# Supplementary material for: Discovery of gene-alcohol interaction loci influencing blood pressure in 1.1 million individuals from multiple populations
Source: Research Square preprint supplement (doi:10.21203/rs.3.rs-9283196/v1), 2026-04-03

## Supplementary Figure 3. Miami and QQ plots of 1df (pint, top) and joint 2df of main and GxAlc interaction (pjoint, bottom) P-values for population, trait, alcohol exposure, and sex (Tables 1 and 2). The red and yellow line colors represent the novel and known GxAlc BP loci, respectively.


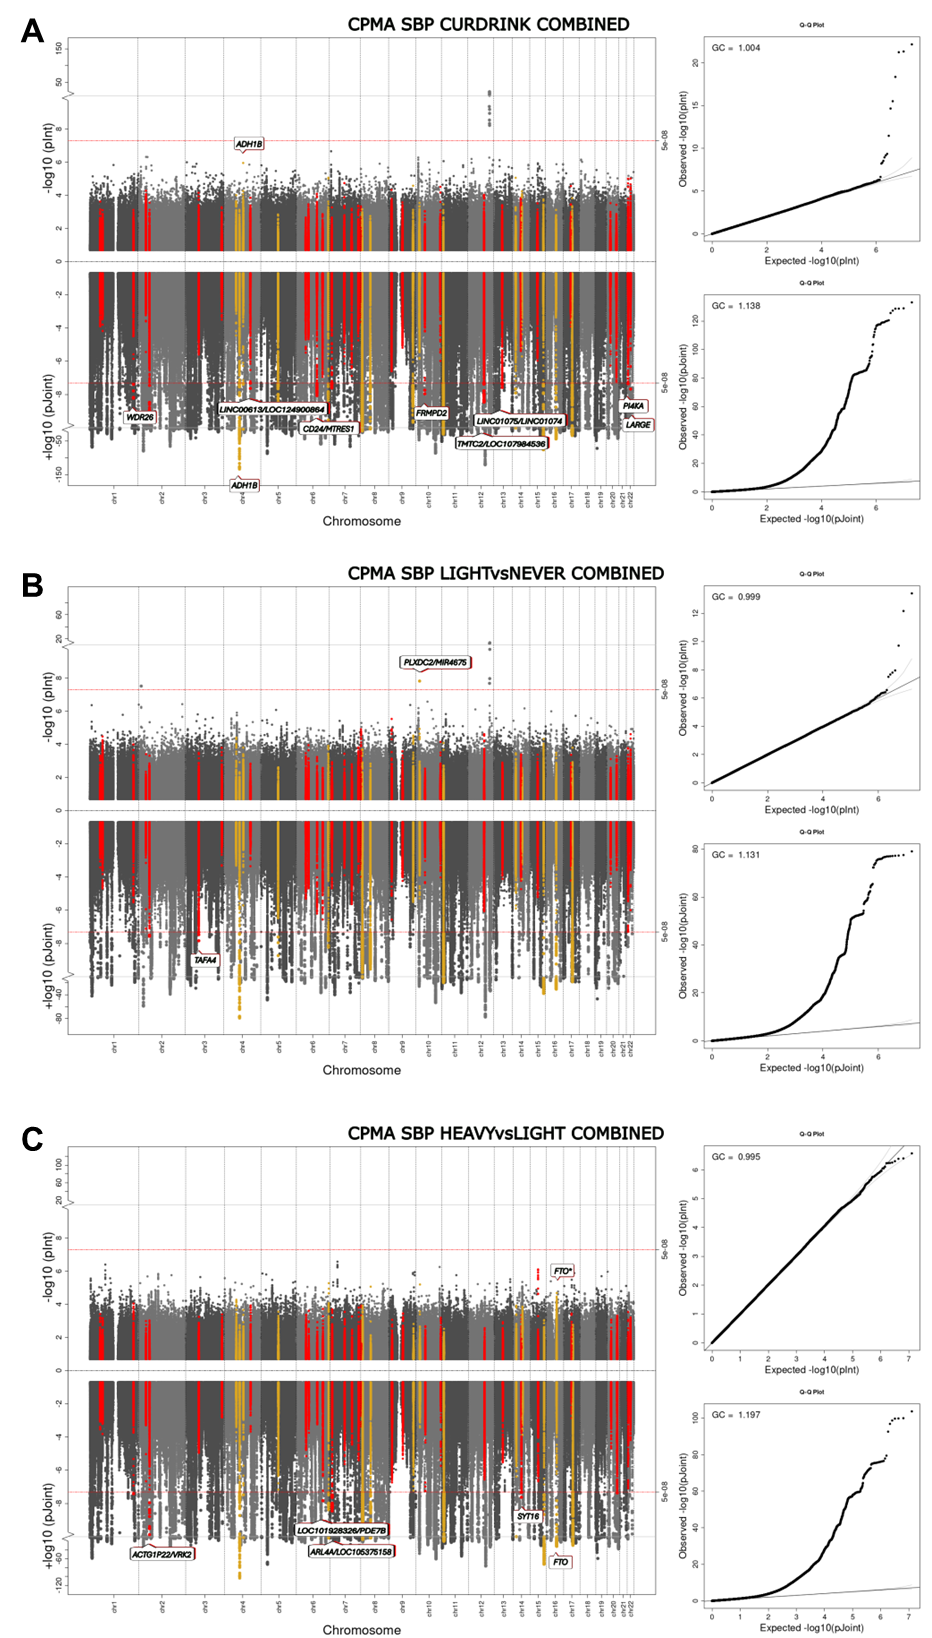


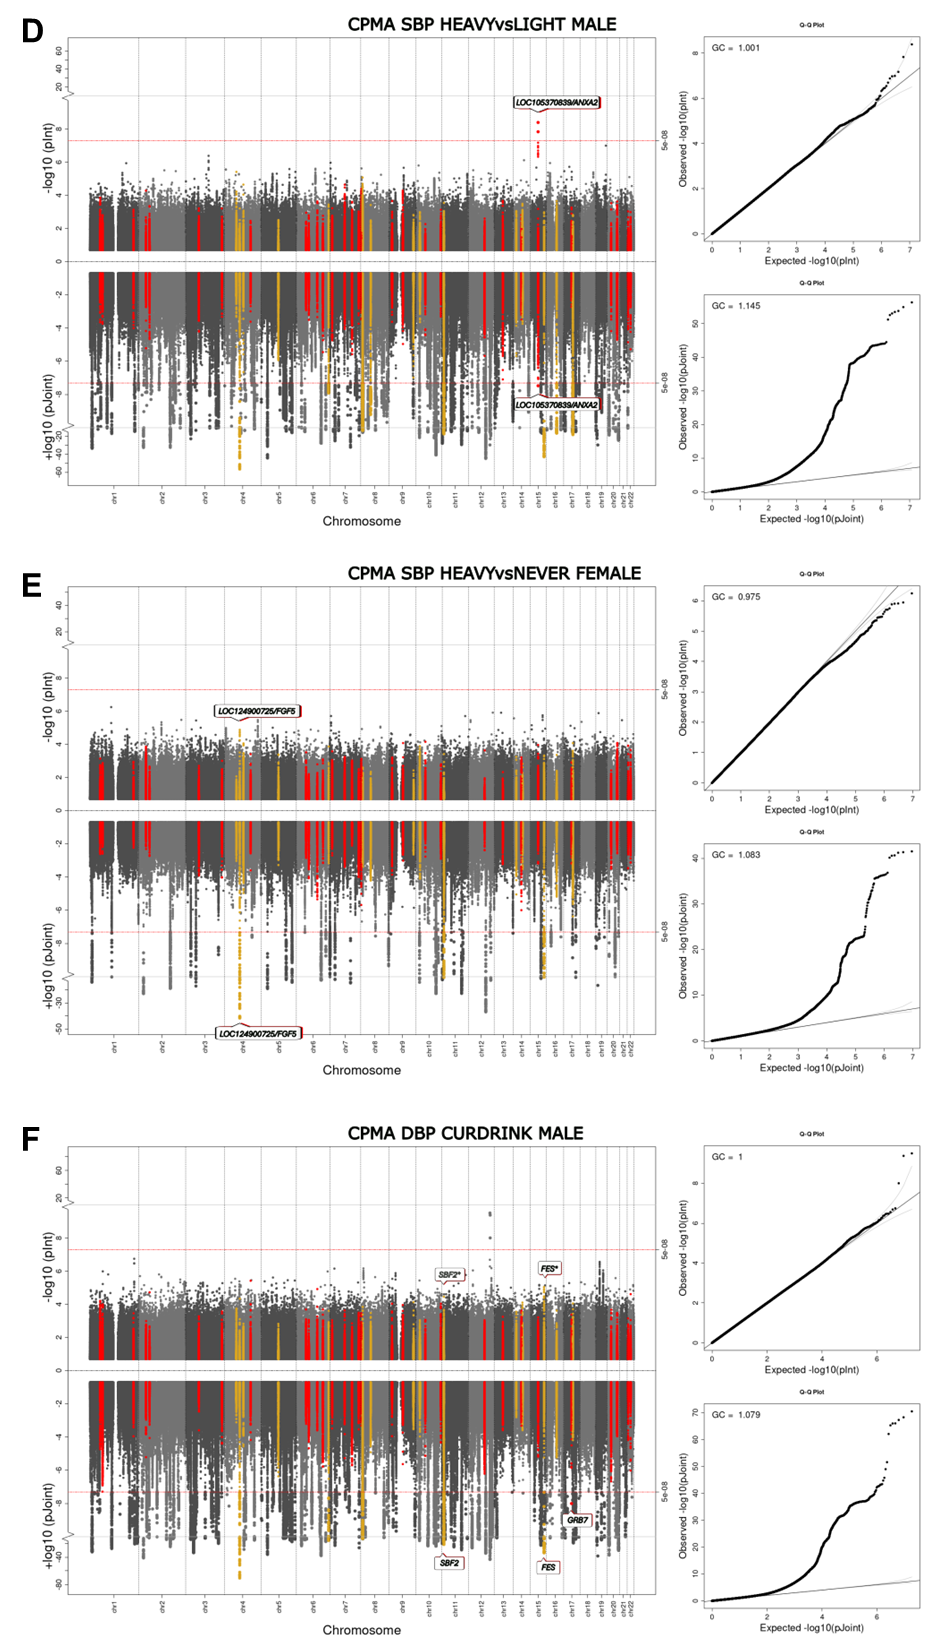


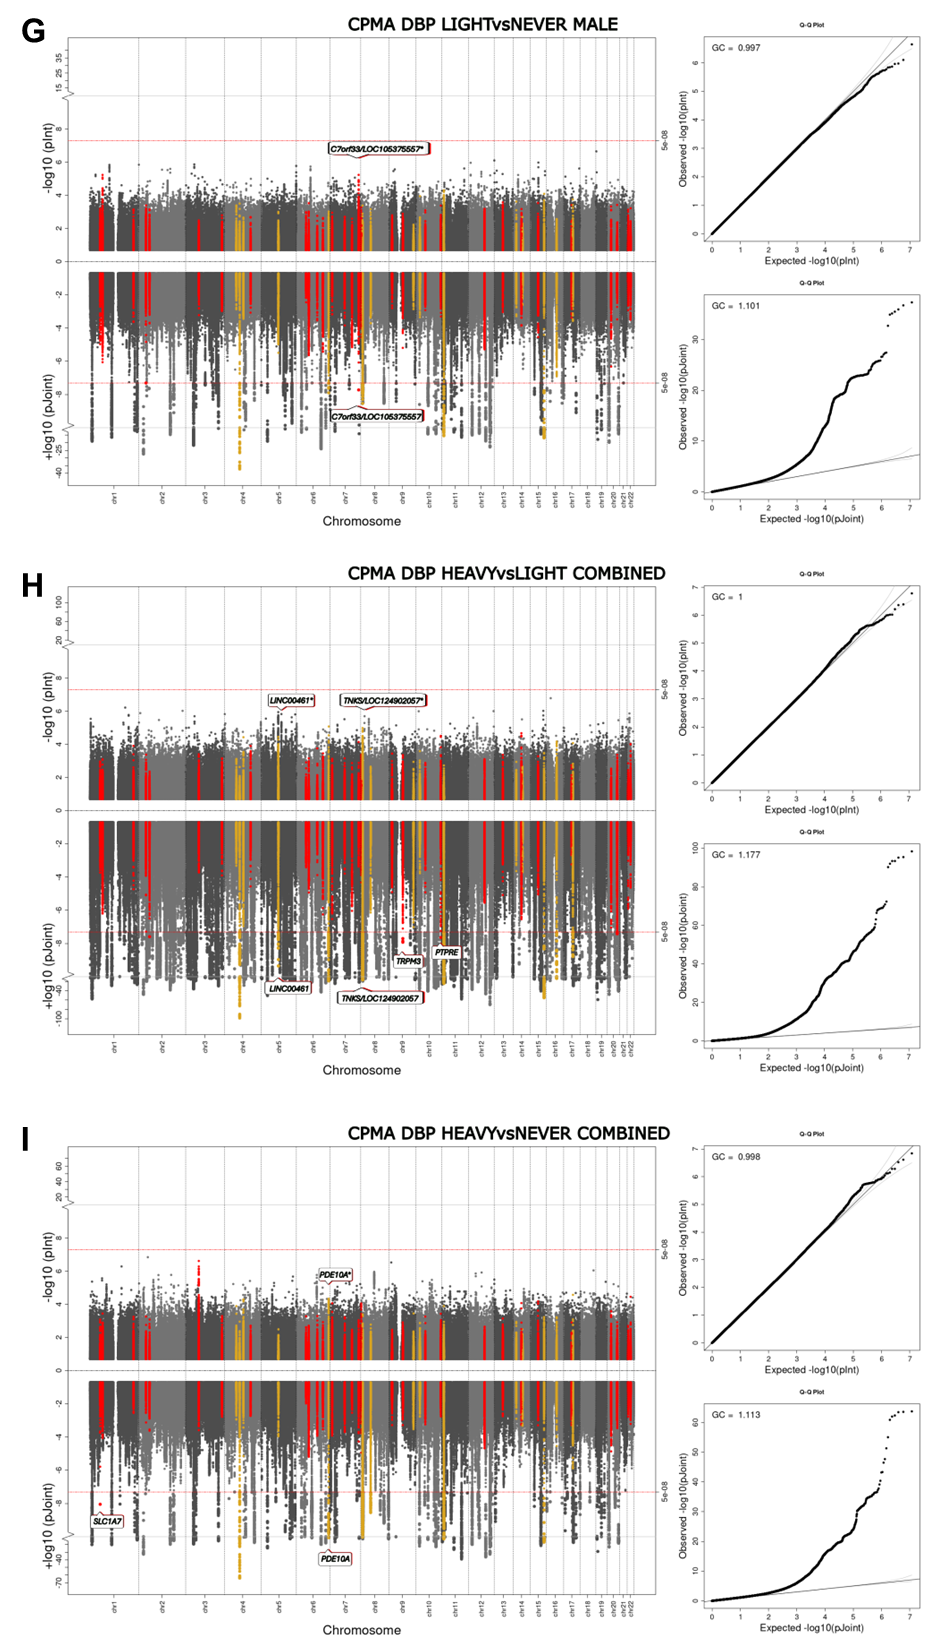


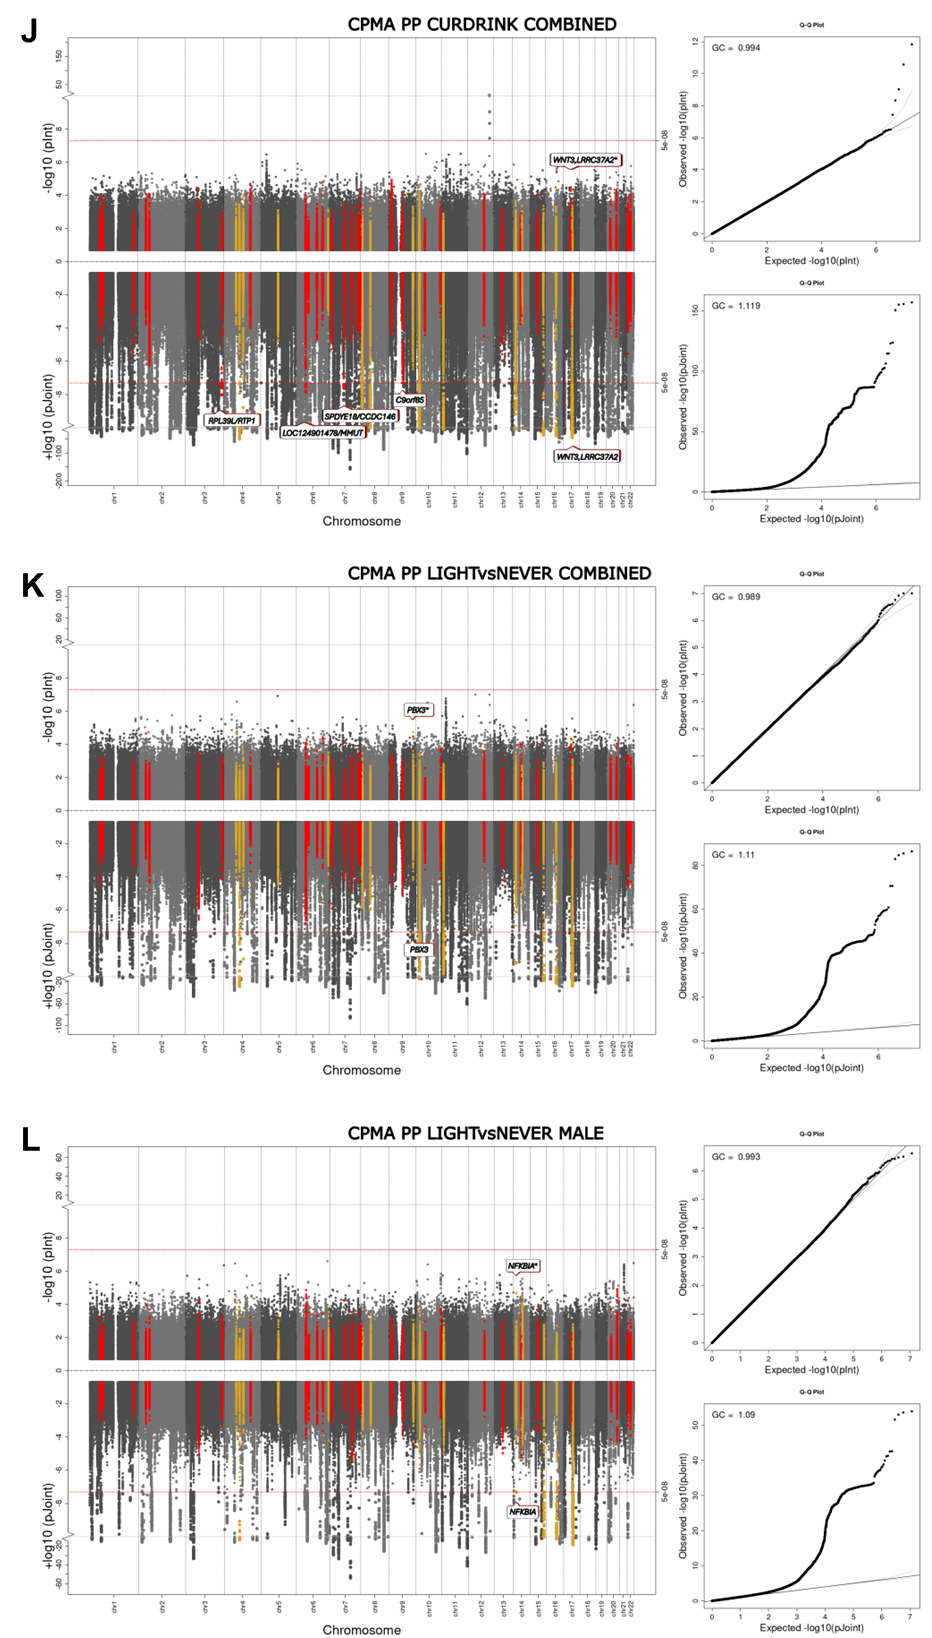


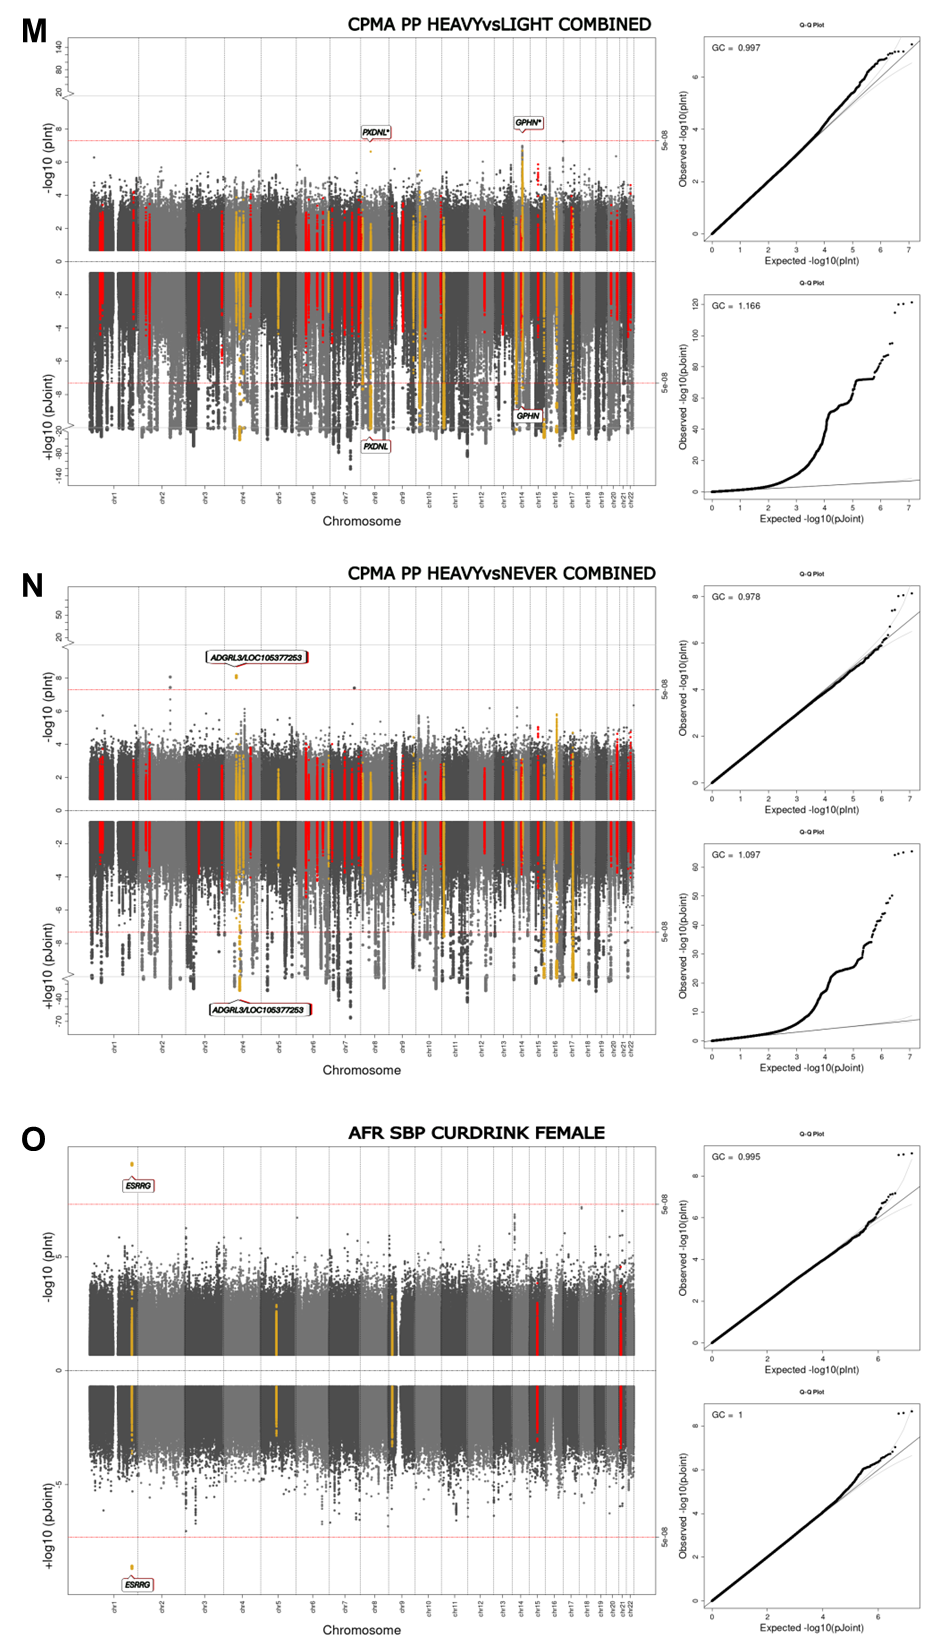


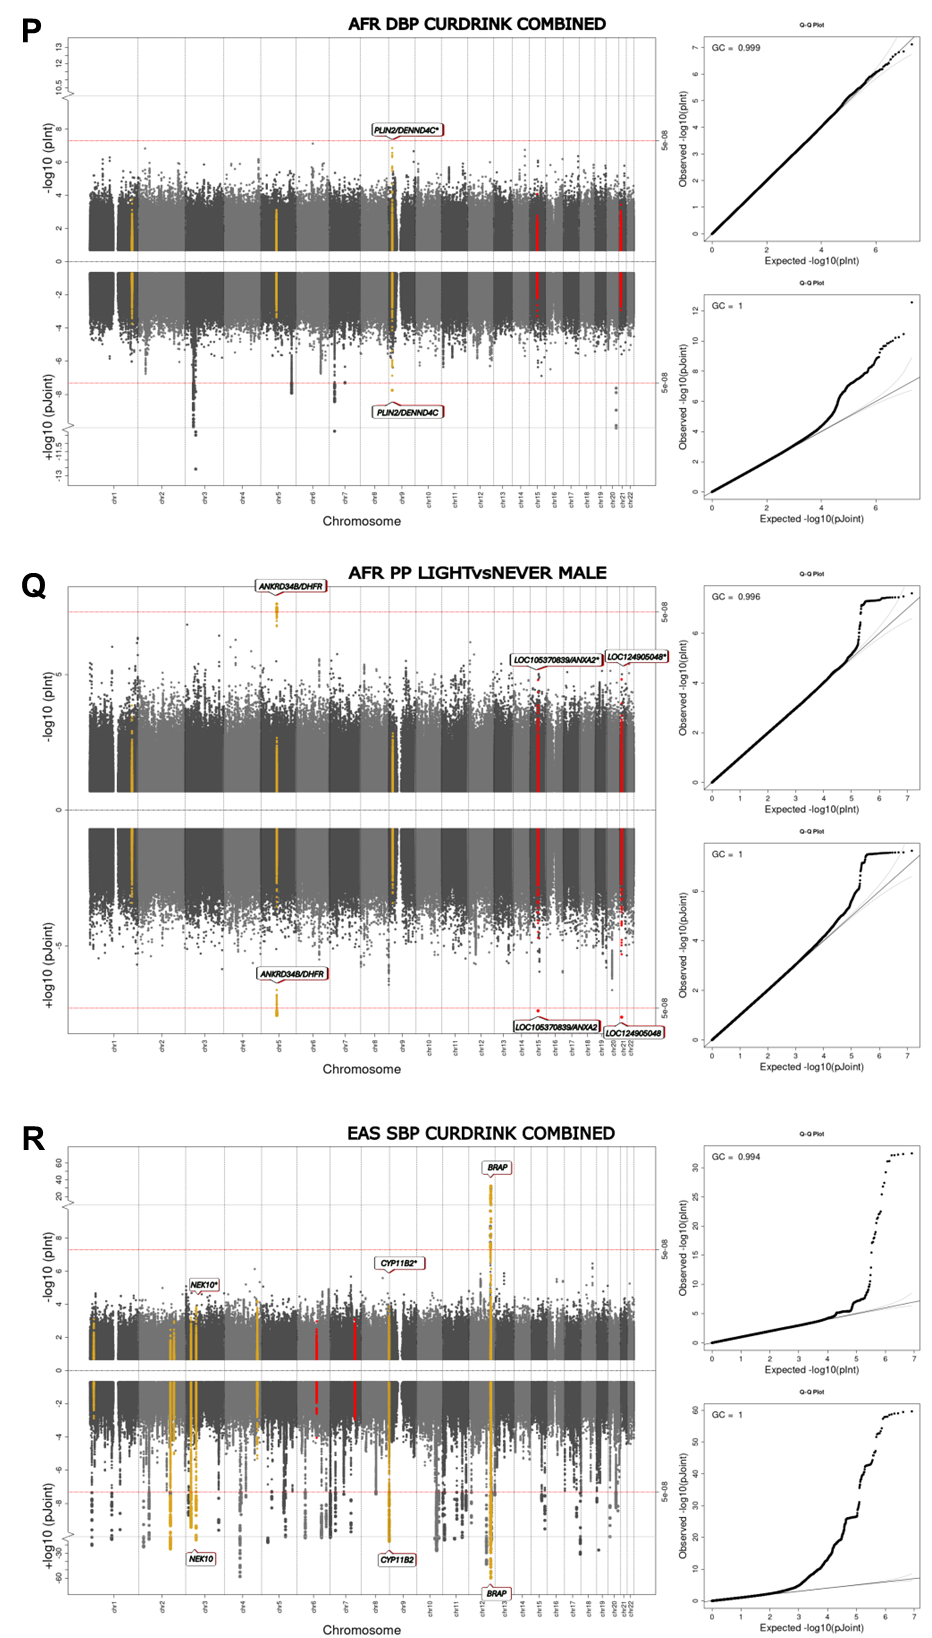


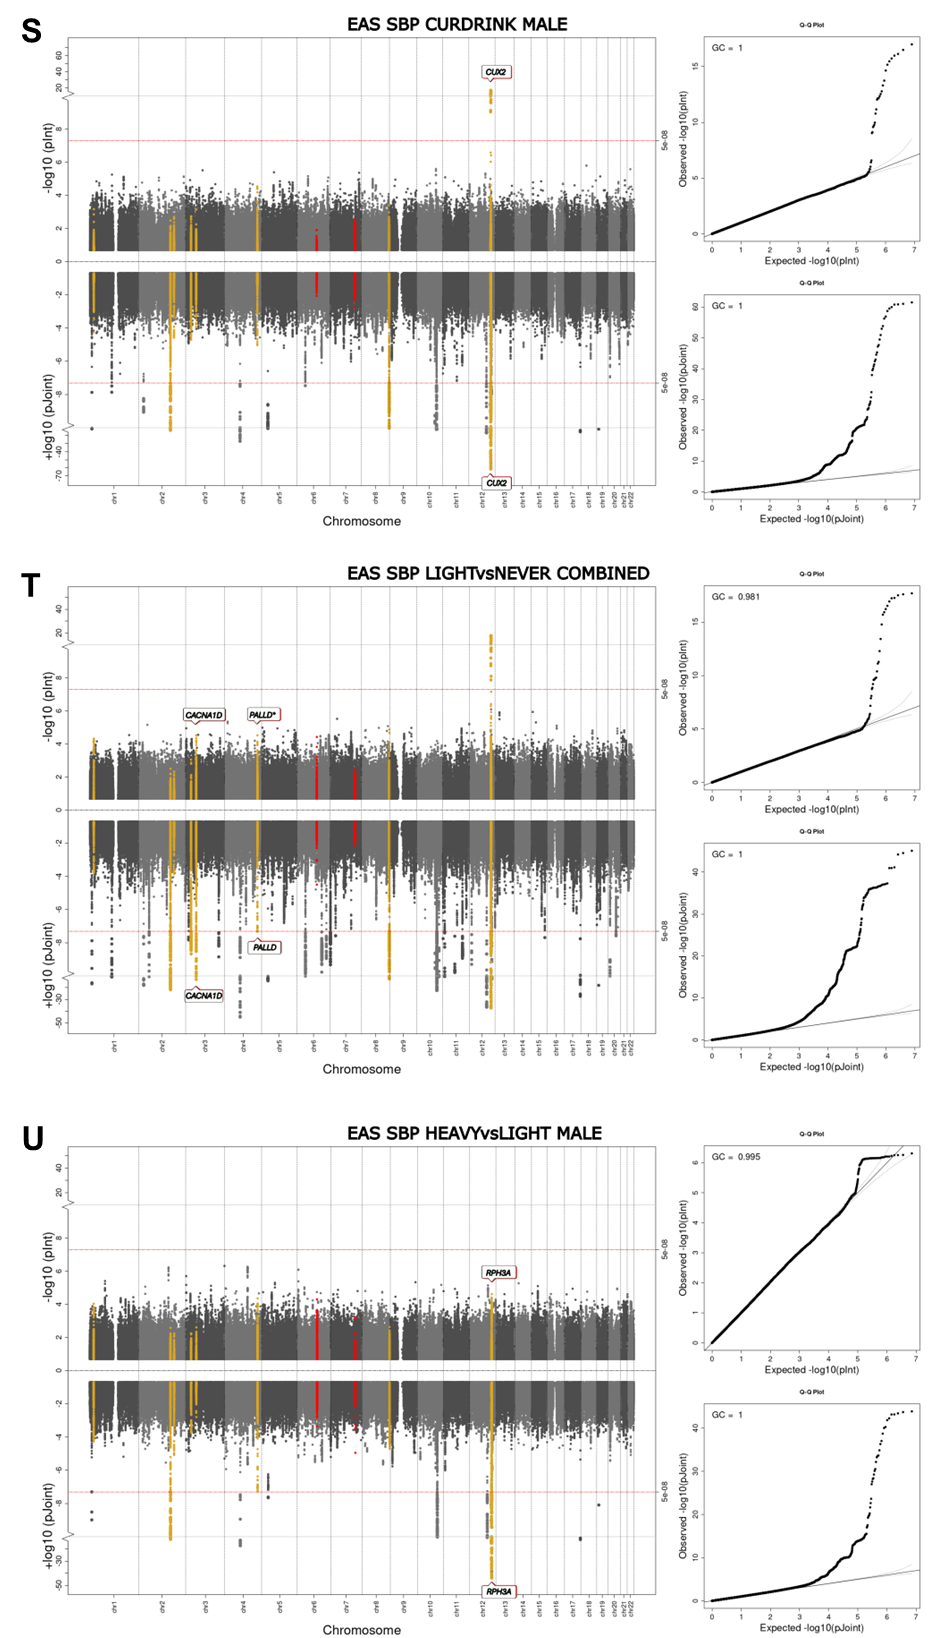


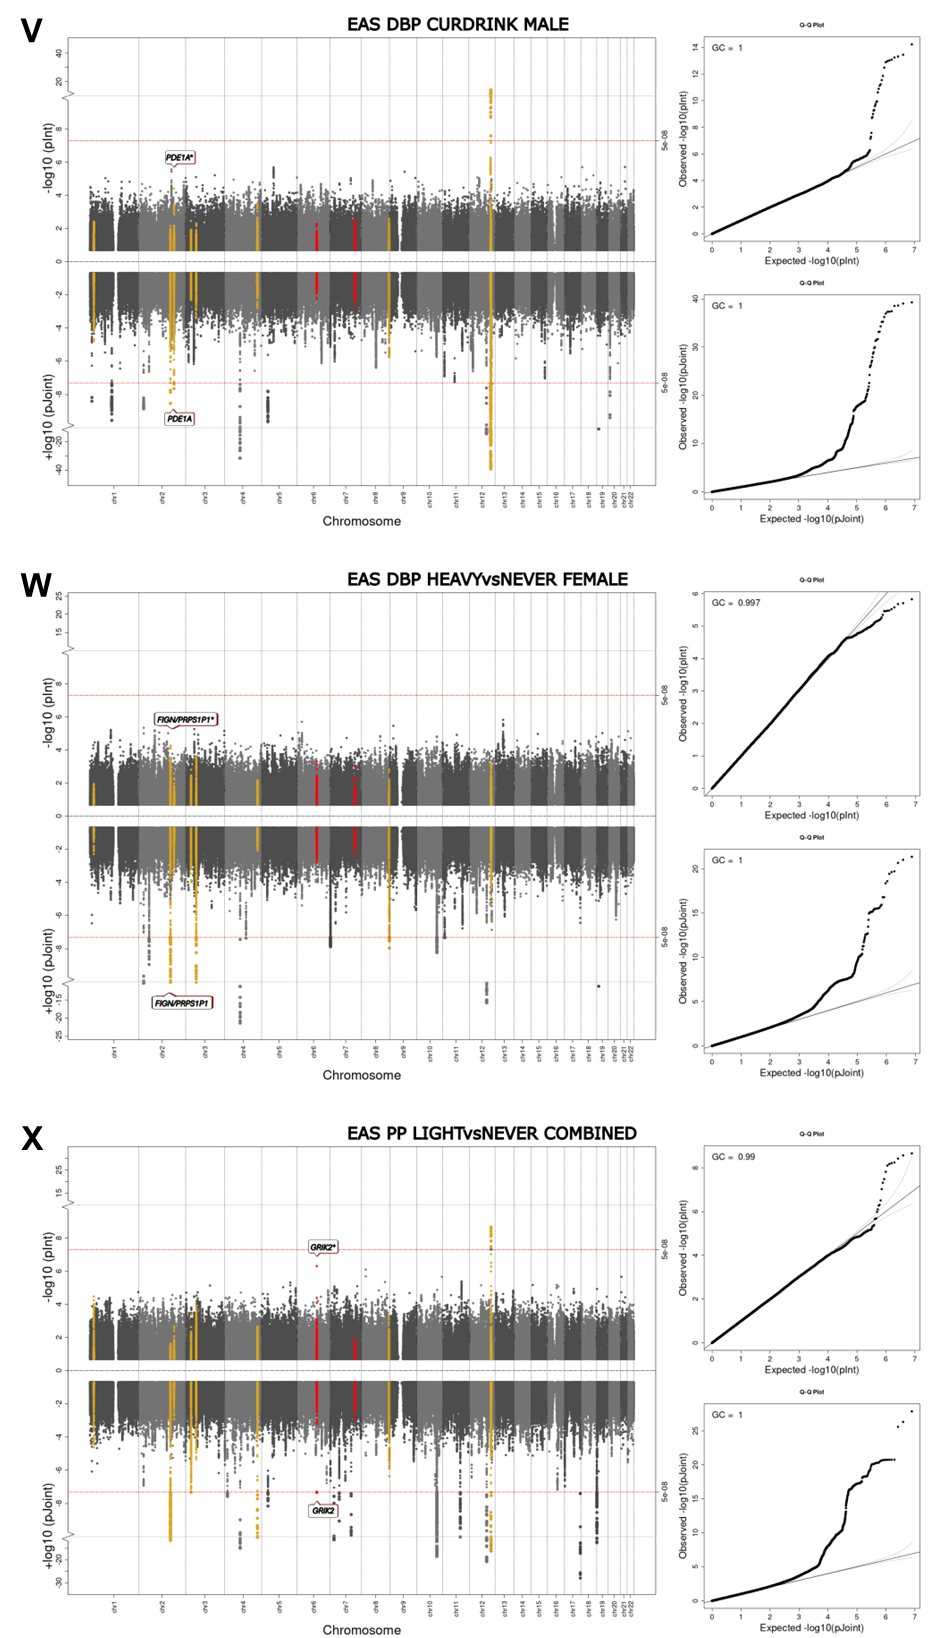


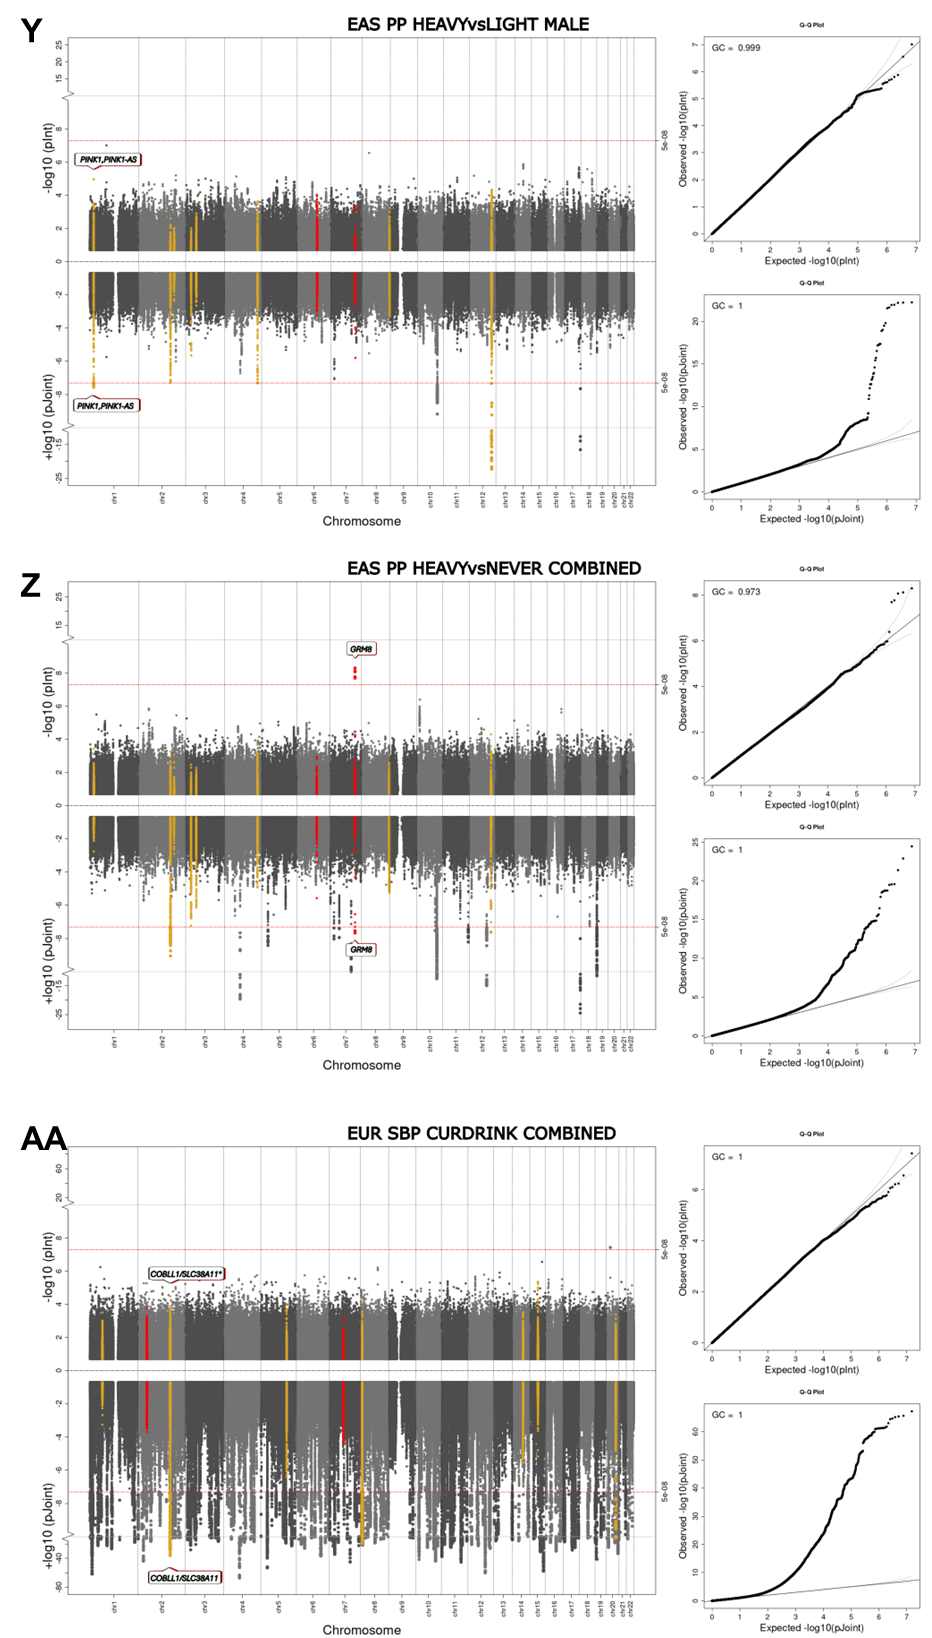


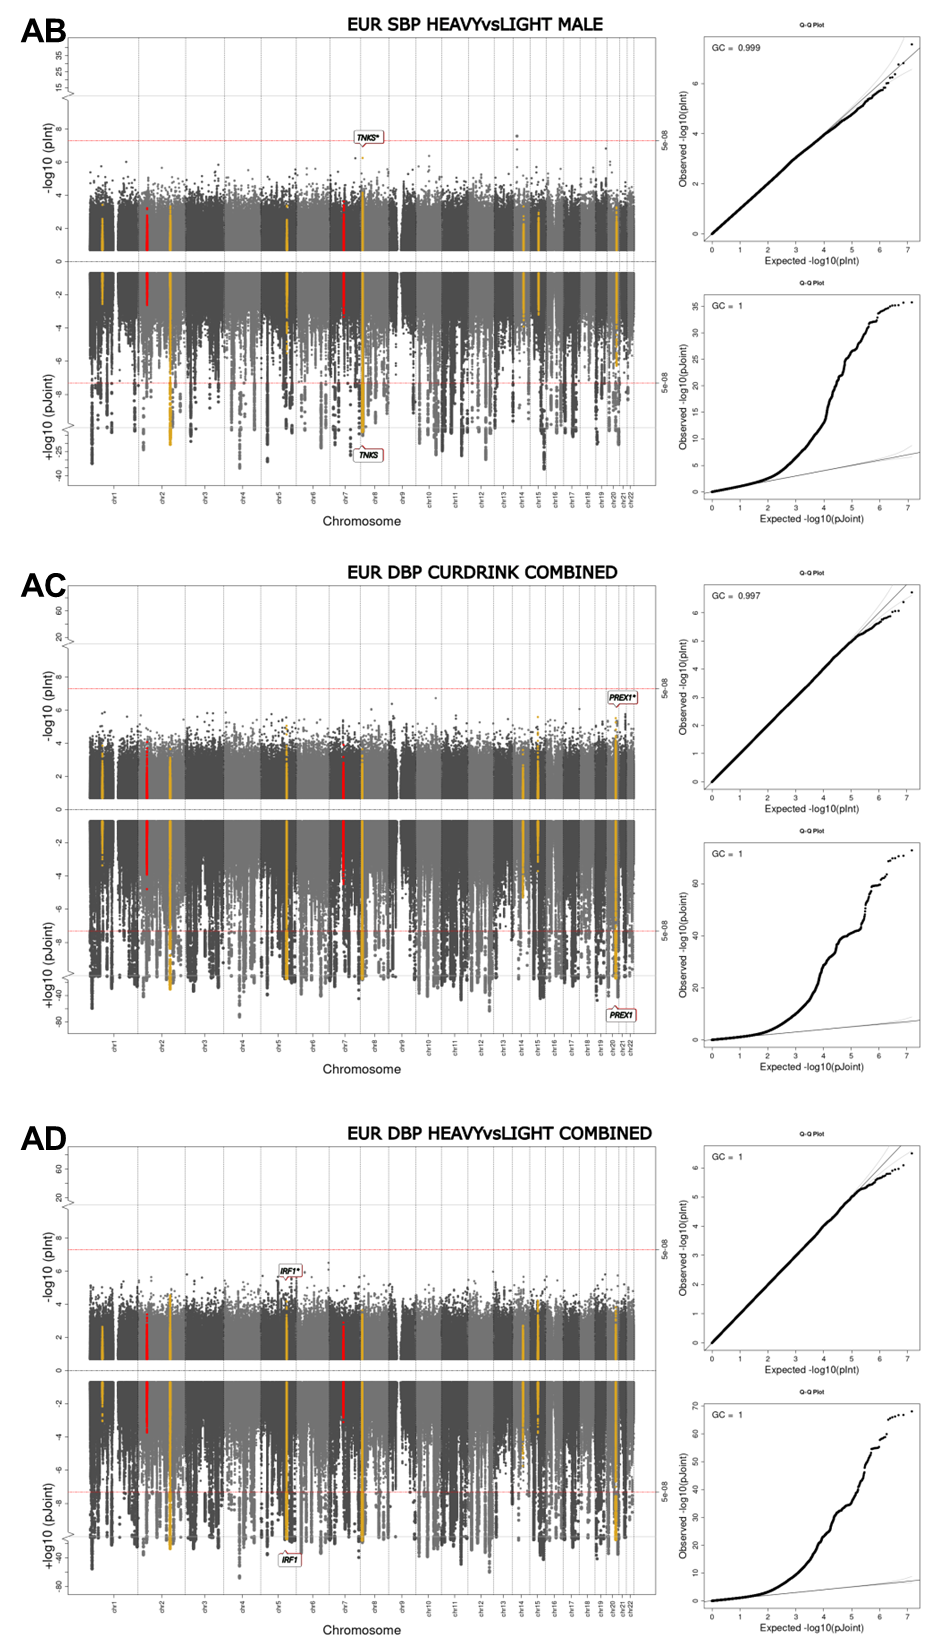


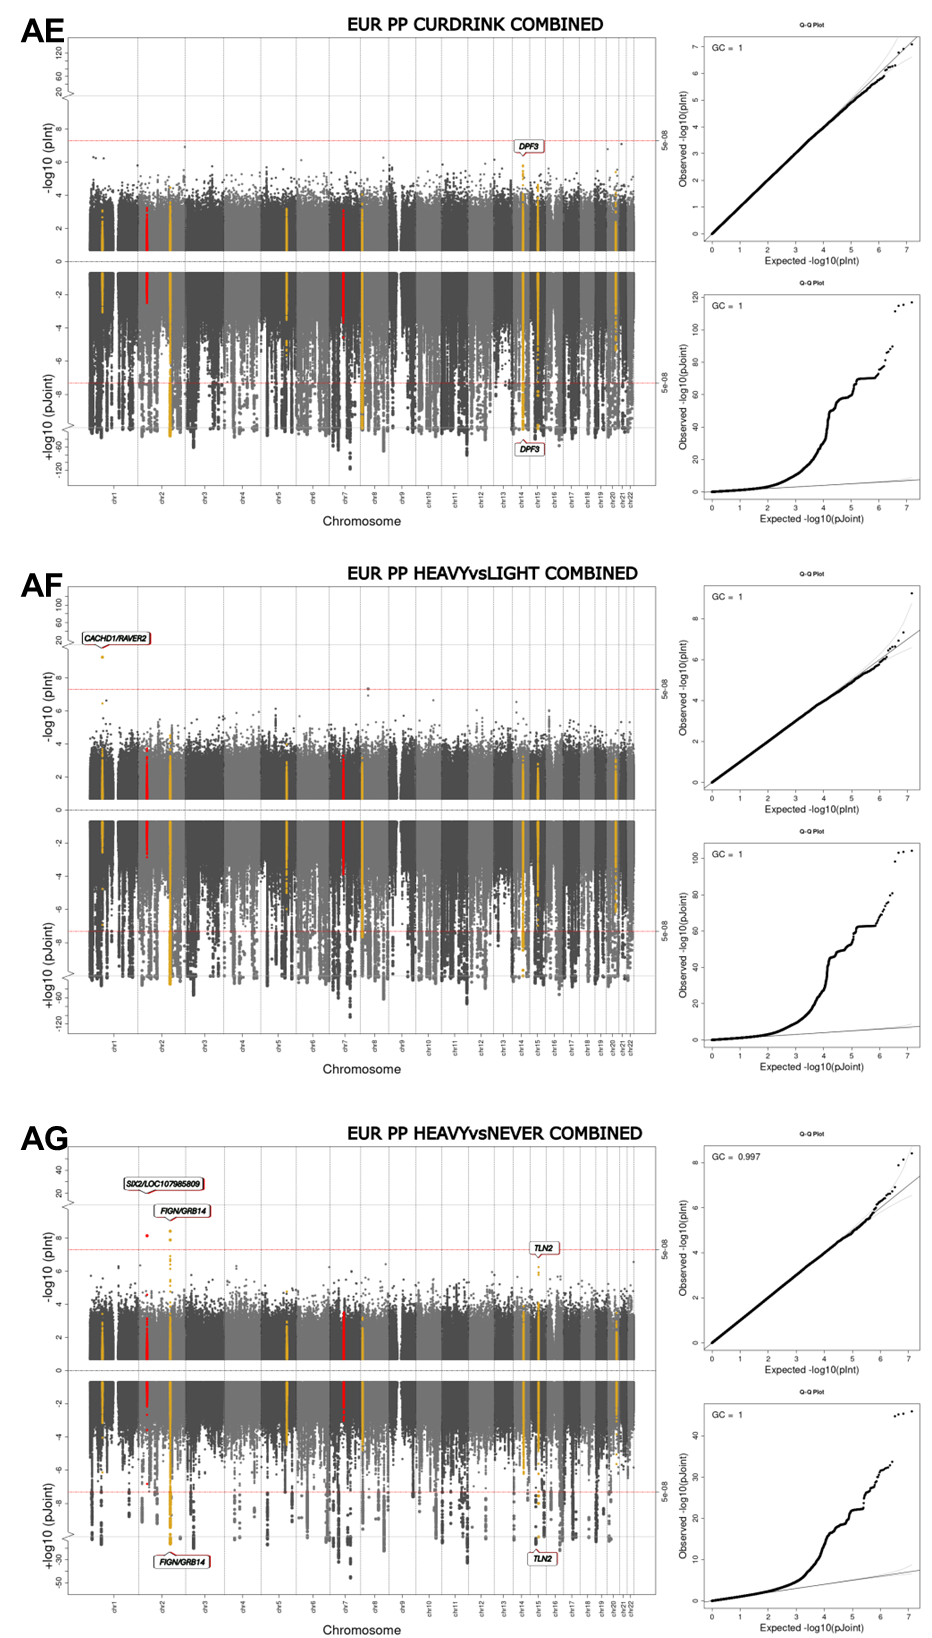


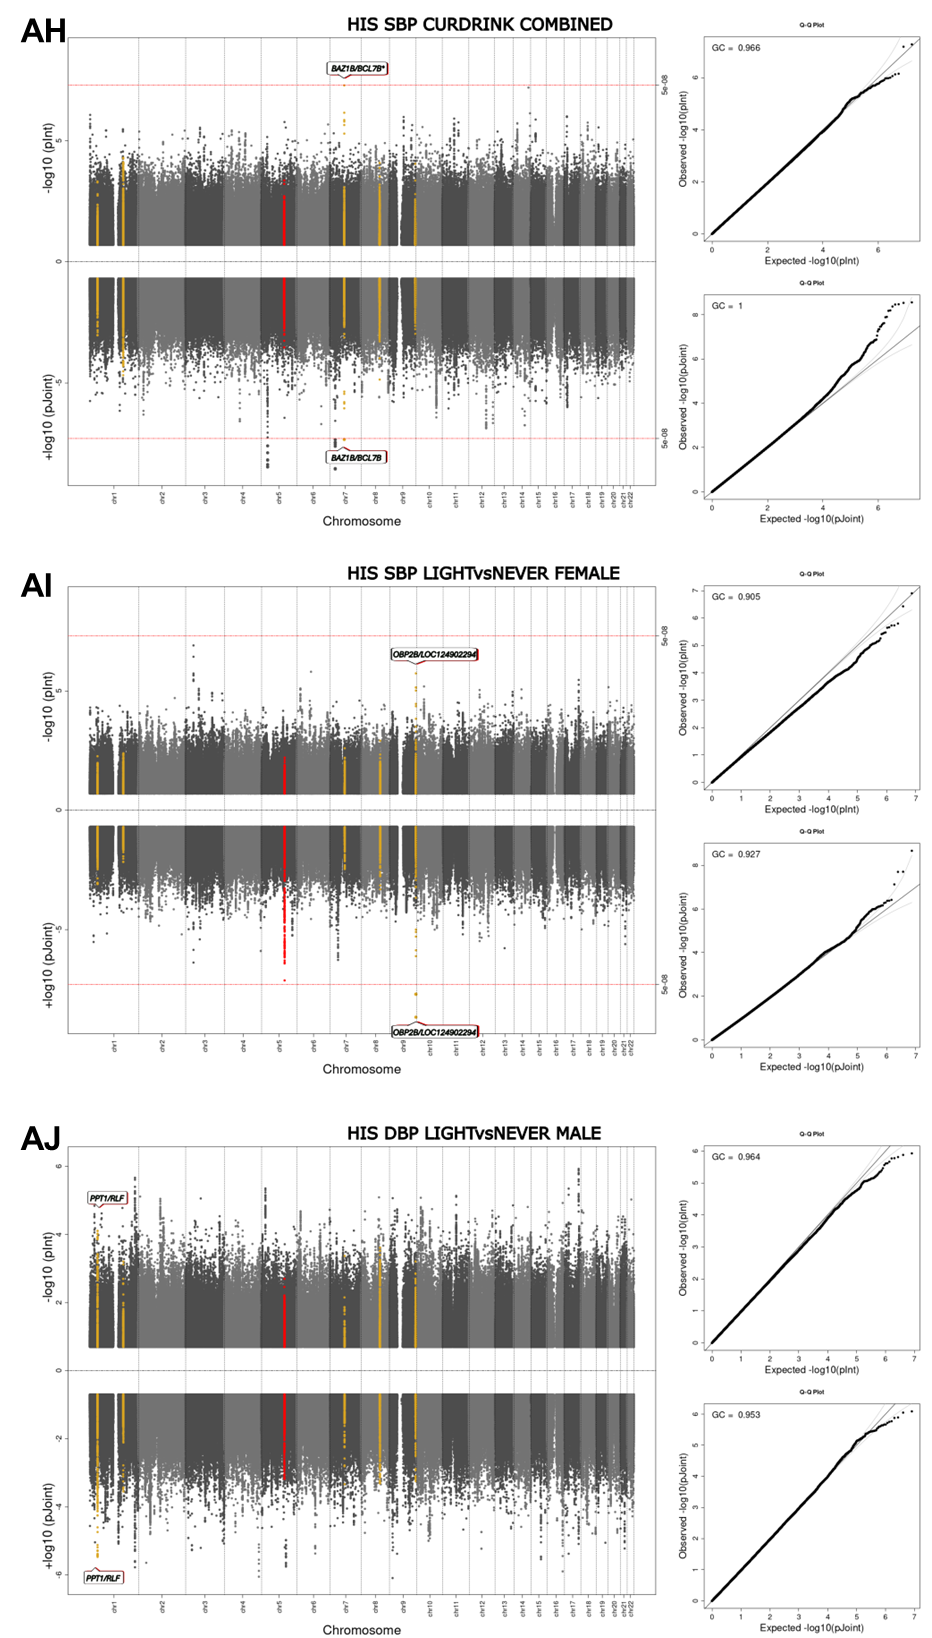


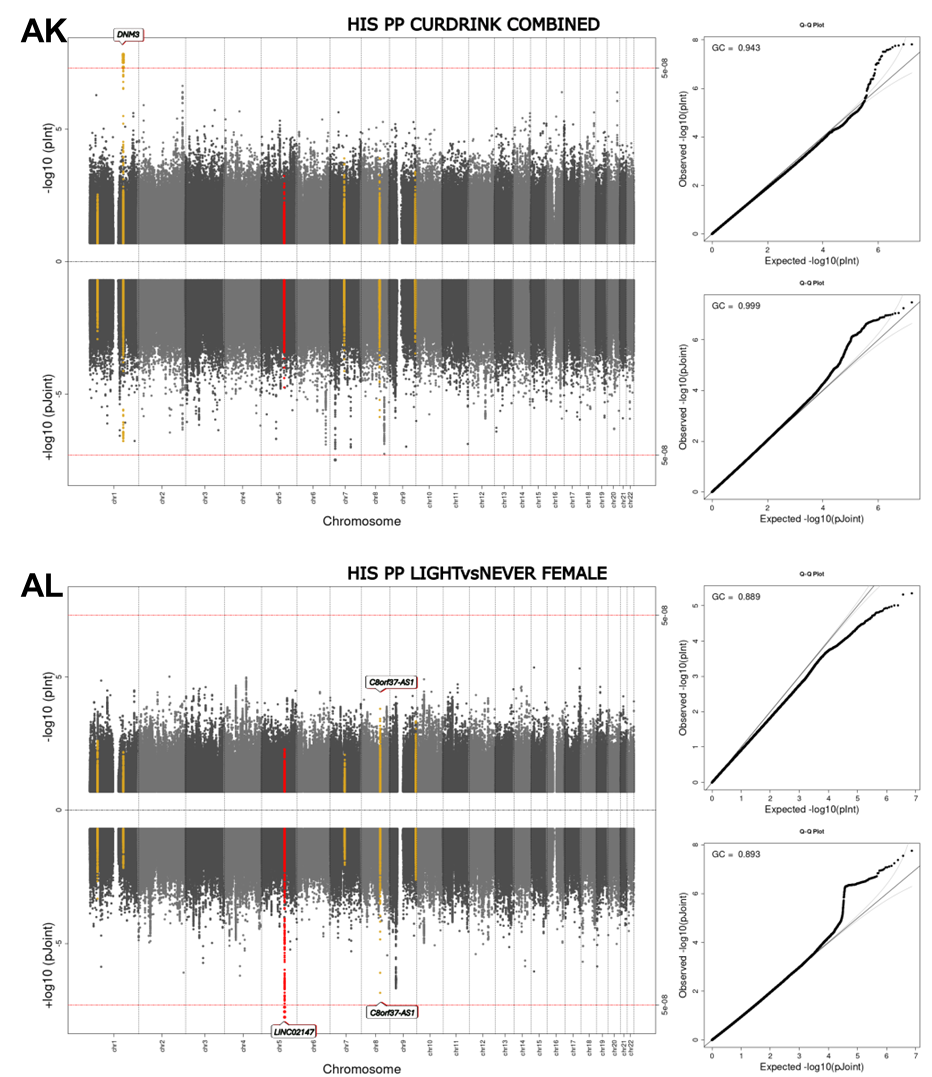

Supplement: Supplementary file 2 [file 0bd9a832a2f2963e8efe6b4b.docx]
