# Supplementary material for: Discovery of gene-alcohol interaction loci influencing blood pressure in 1.1 million individuals from multiple populations
Source: Research Square preprint supplement (doi:10.21203/rs.3.rs-9283196/v1), 2026-04-03

## Supplementary Figure 2. Regional association and forest plots for the 21 primary 1df GxAlc interaction loci

The regional association PGxAlc (shown as the p-value on the Y-axis for each analysis), along with the forest plot of population-specific GxAlc interaction significance levels (M1-1df Int(p)), effect sizes (represented as bars), and the P-value for between-population heterogeneity of the GxAlc interaction effect (pHet).


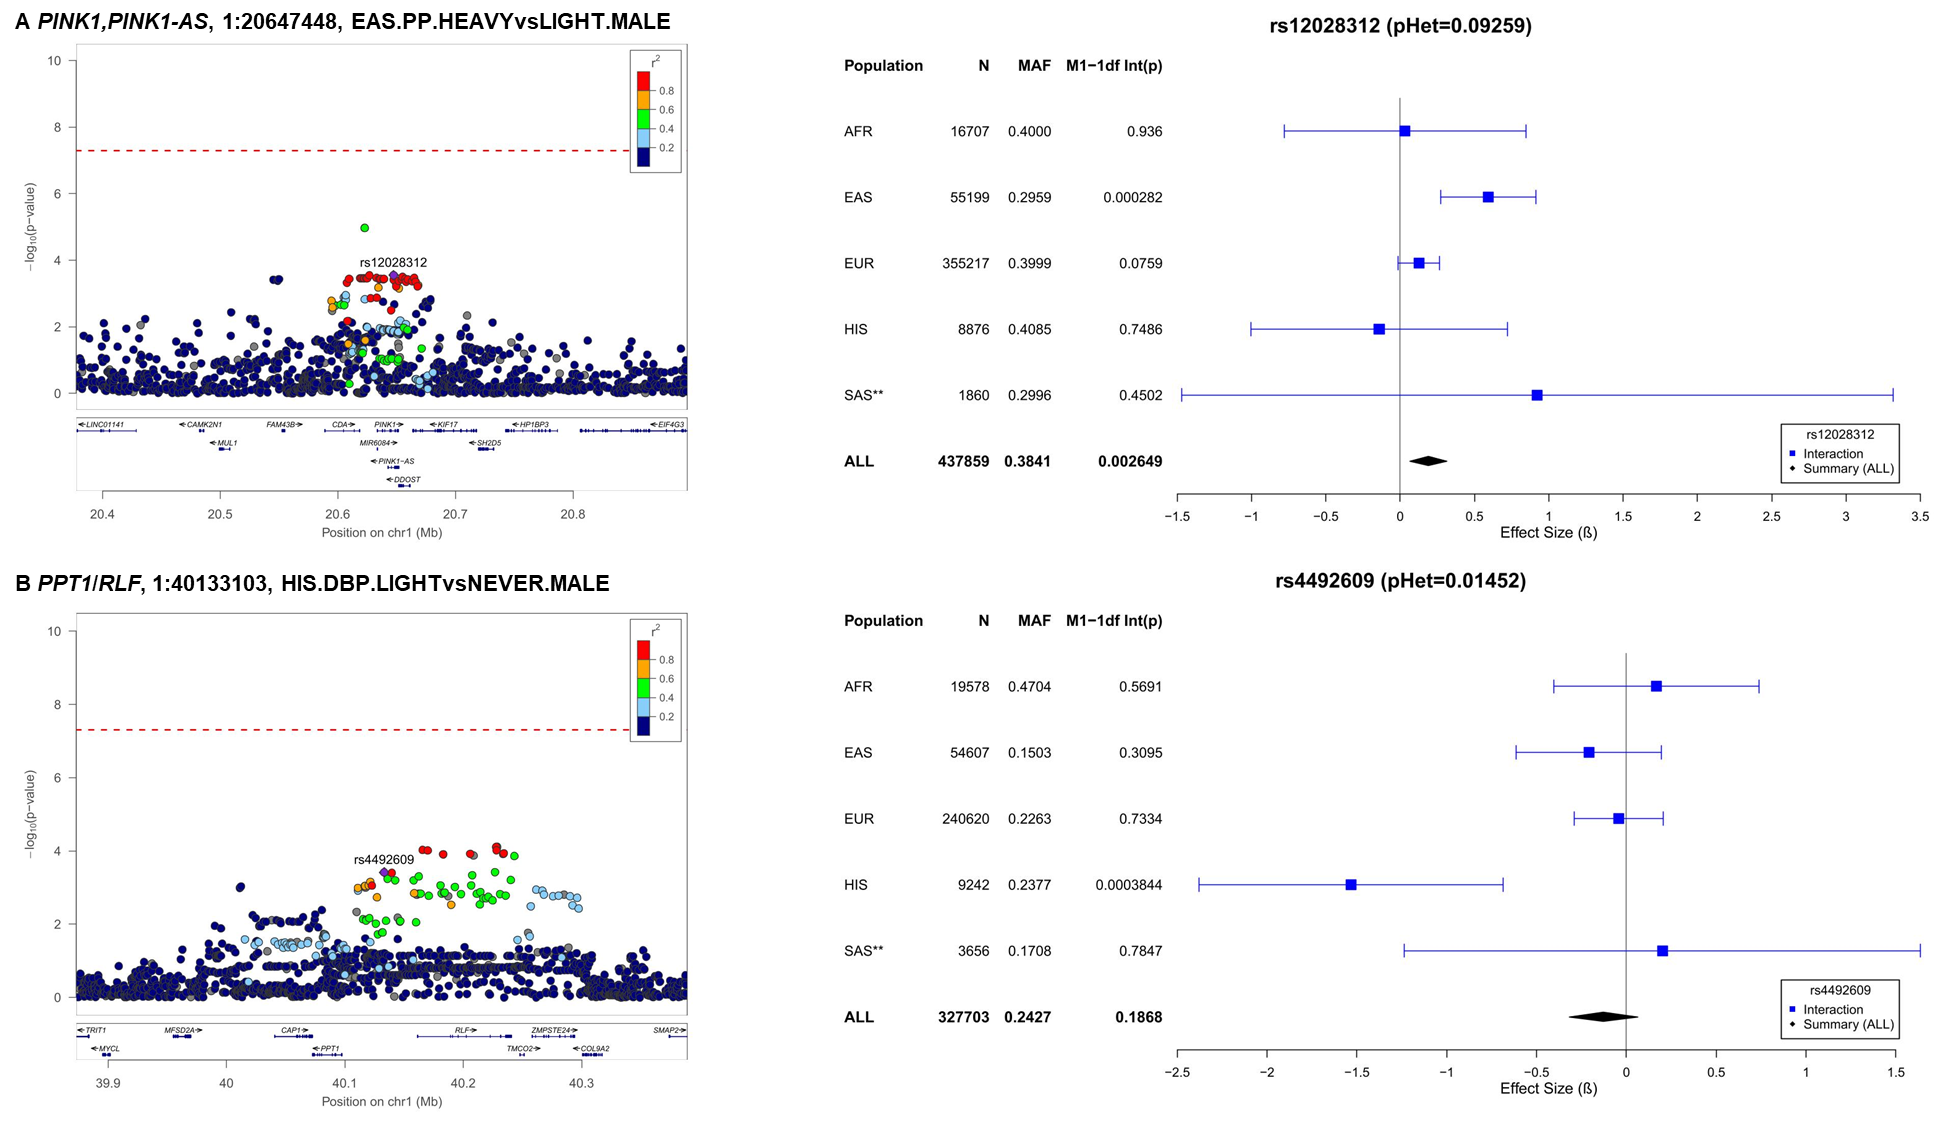


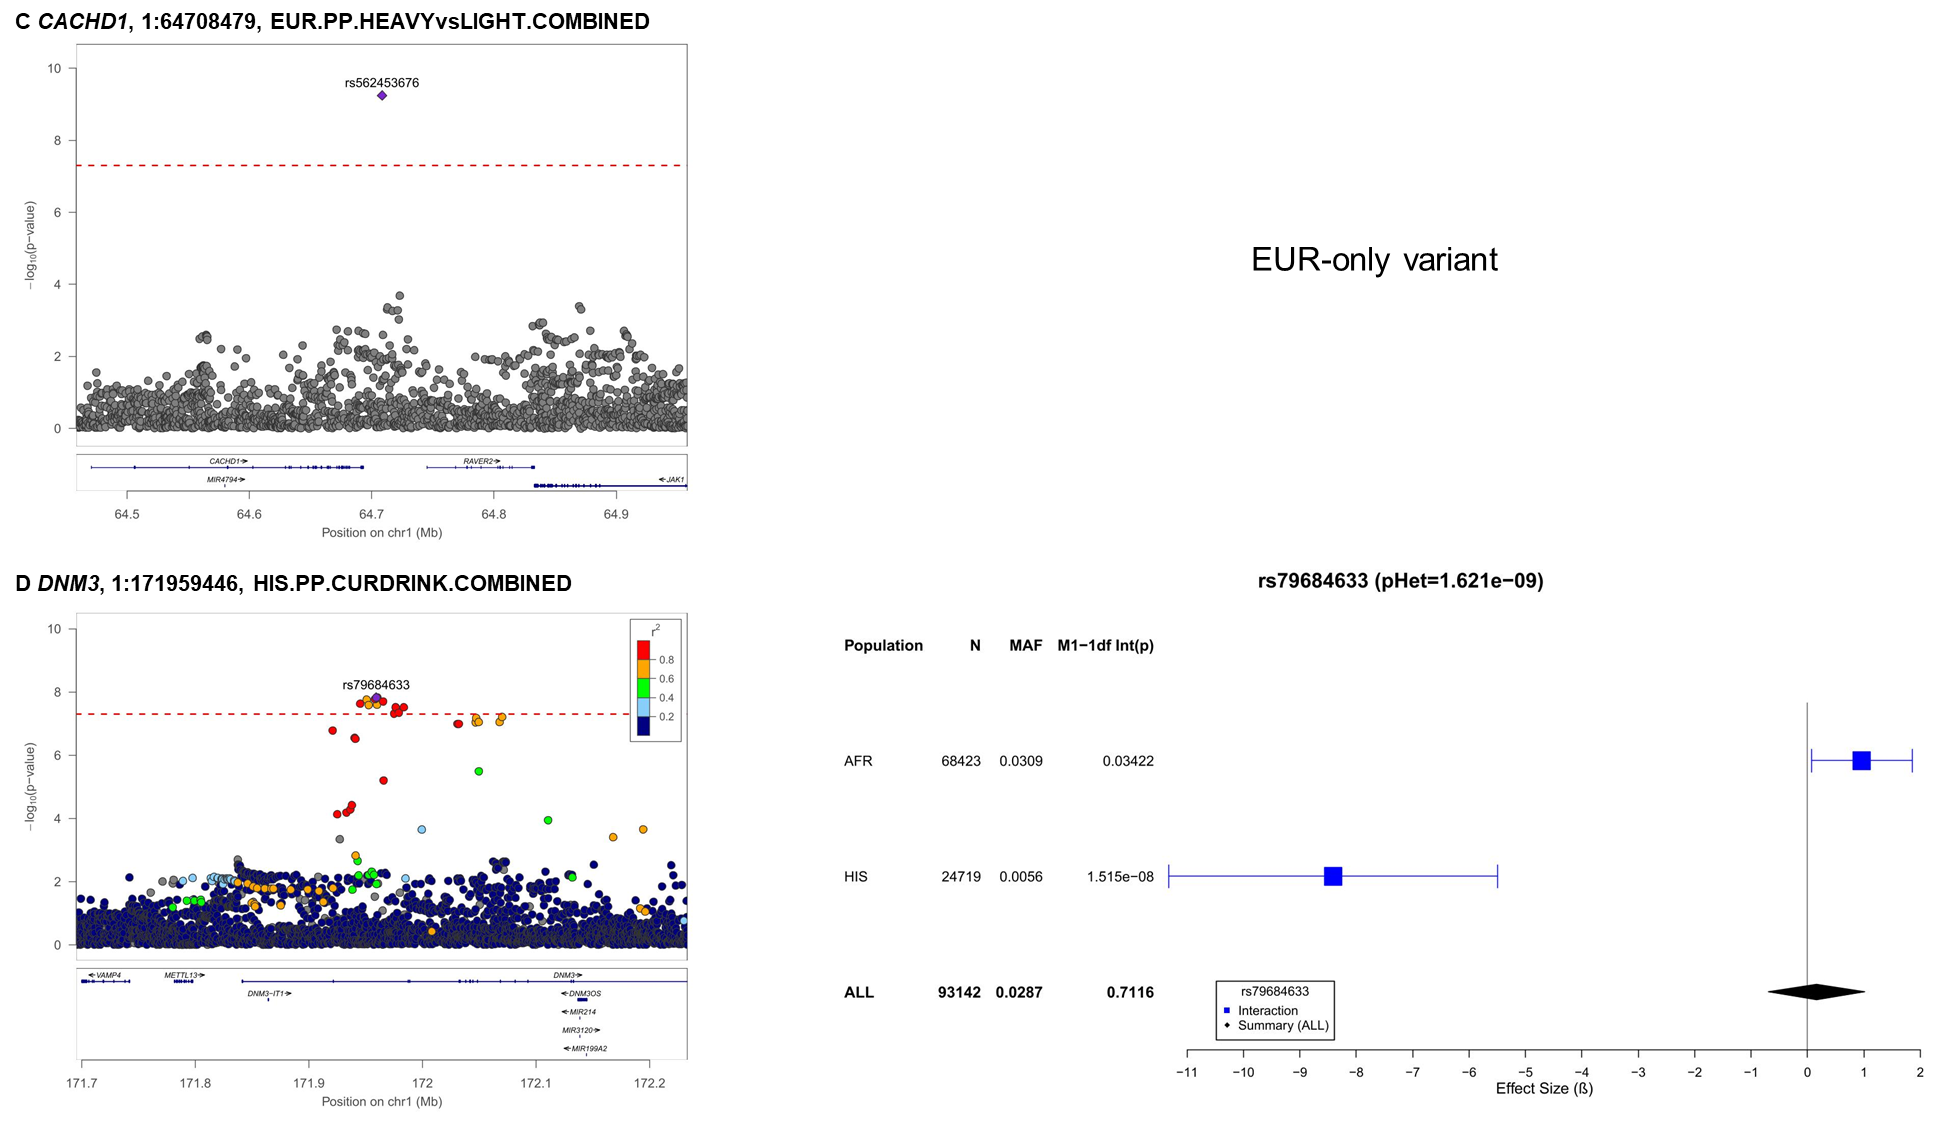


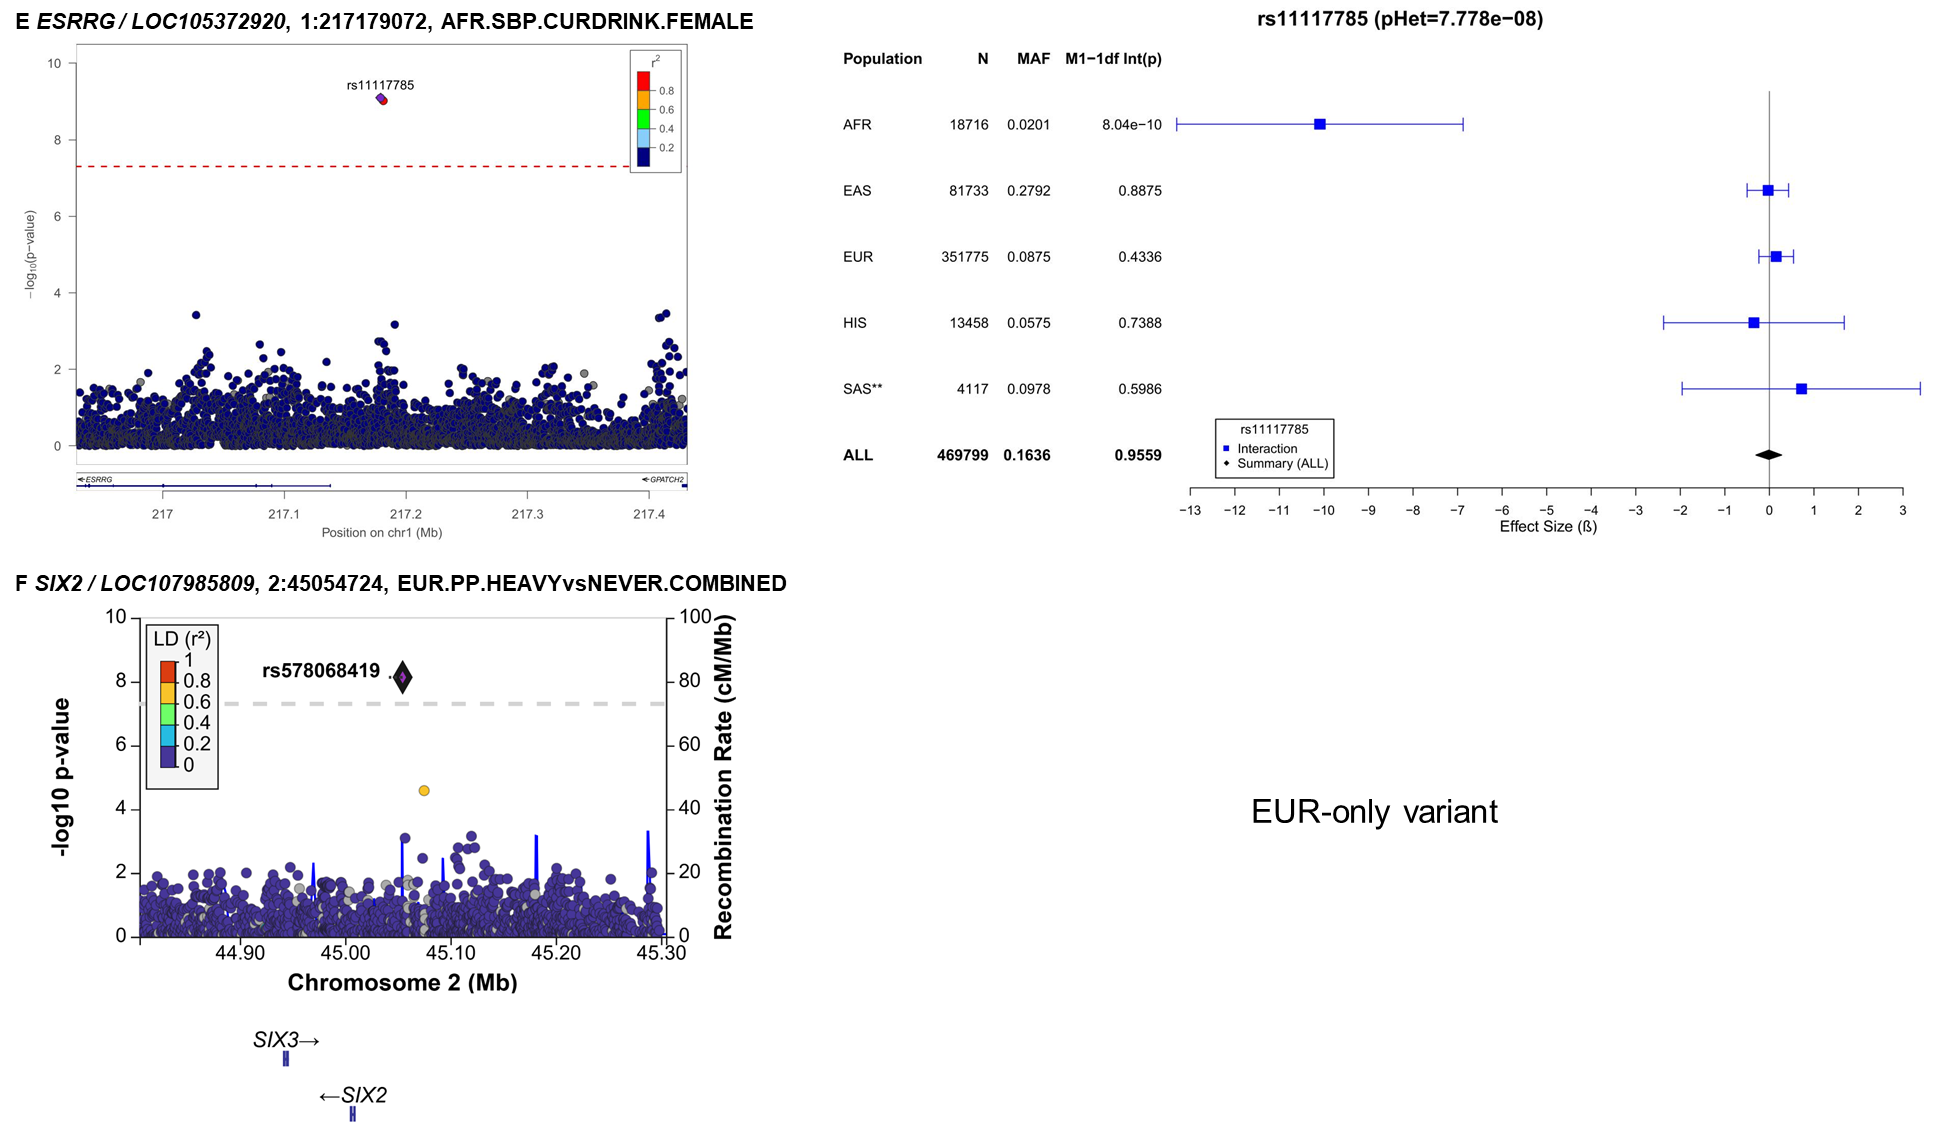


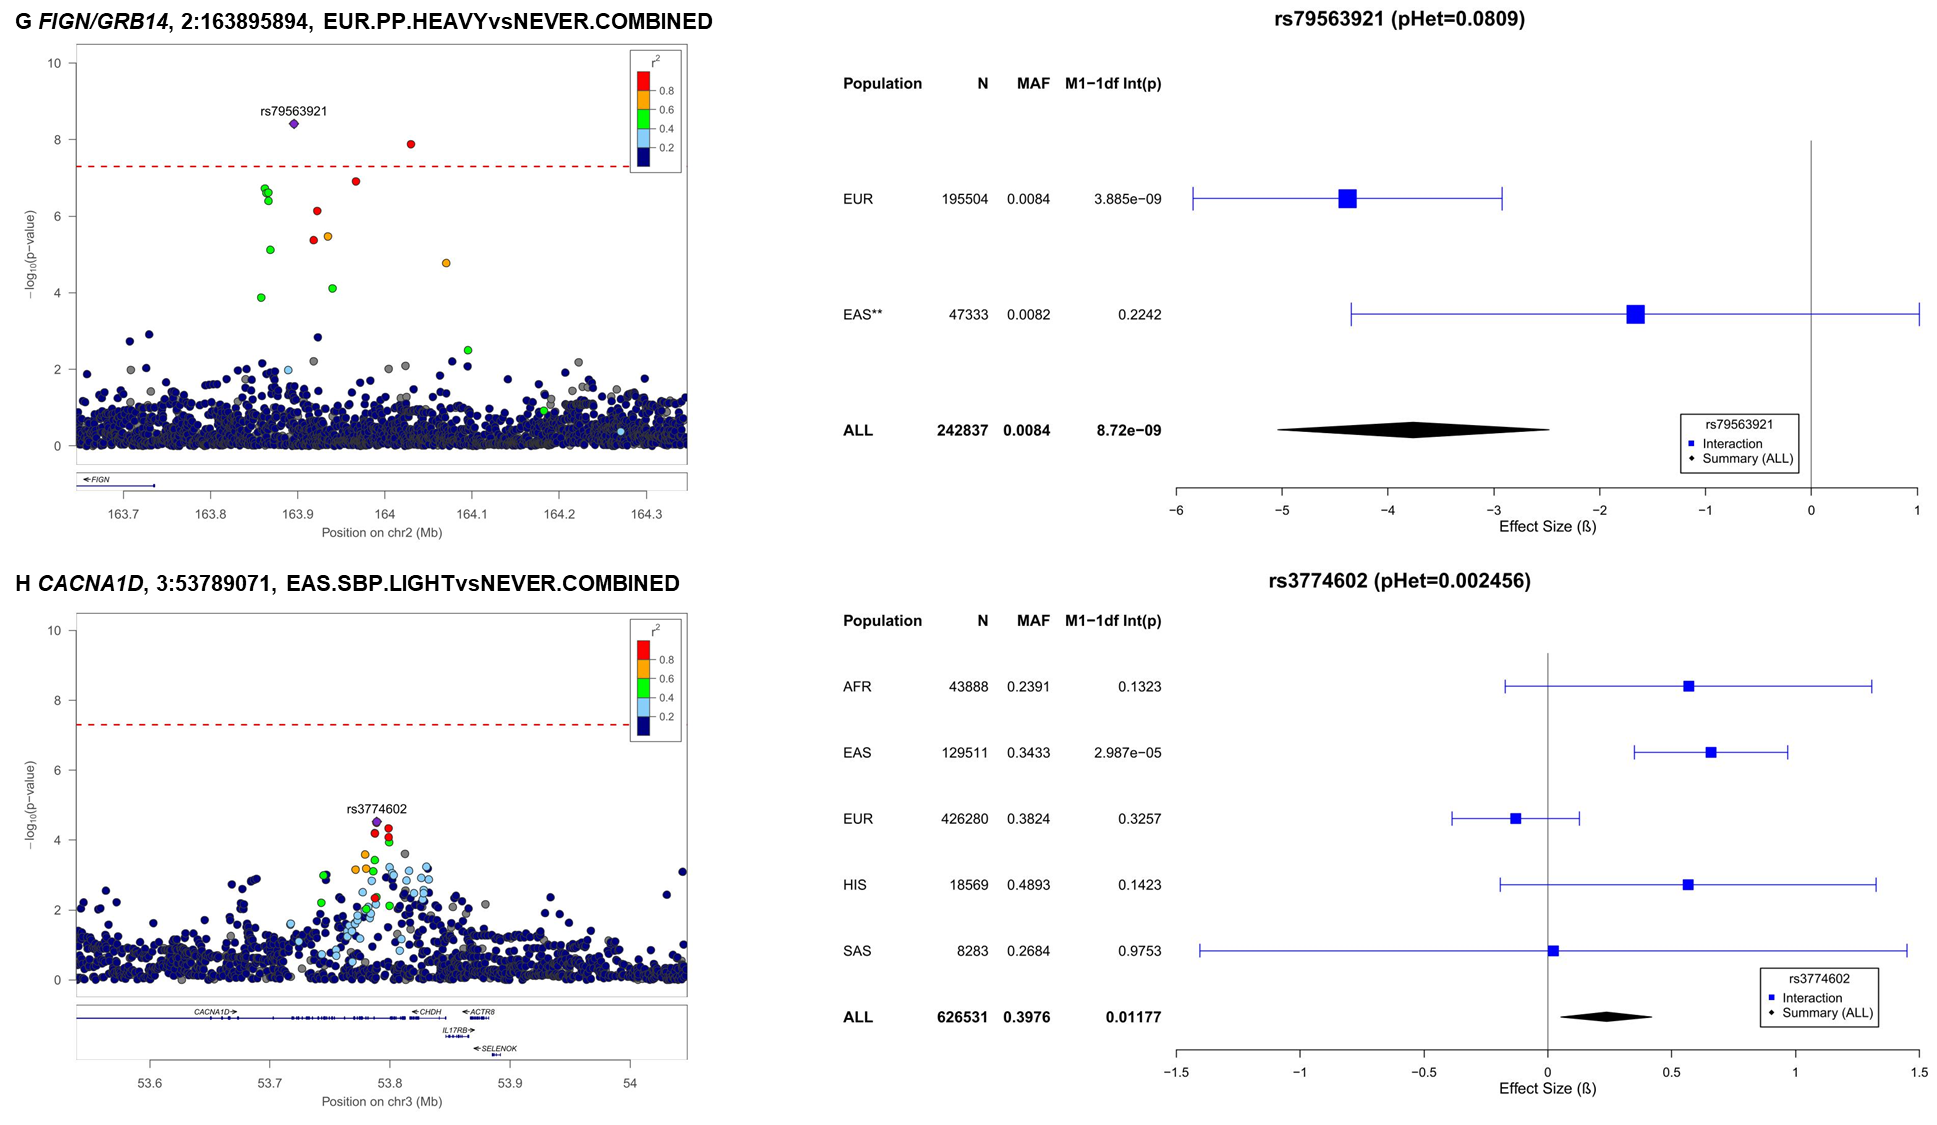


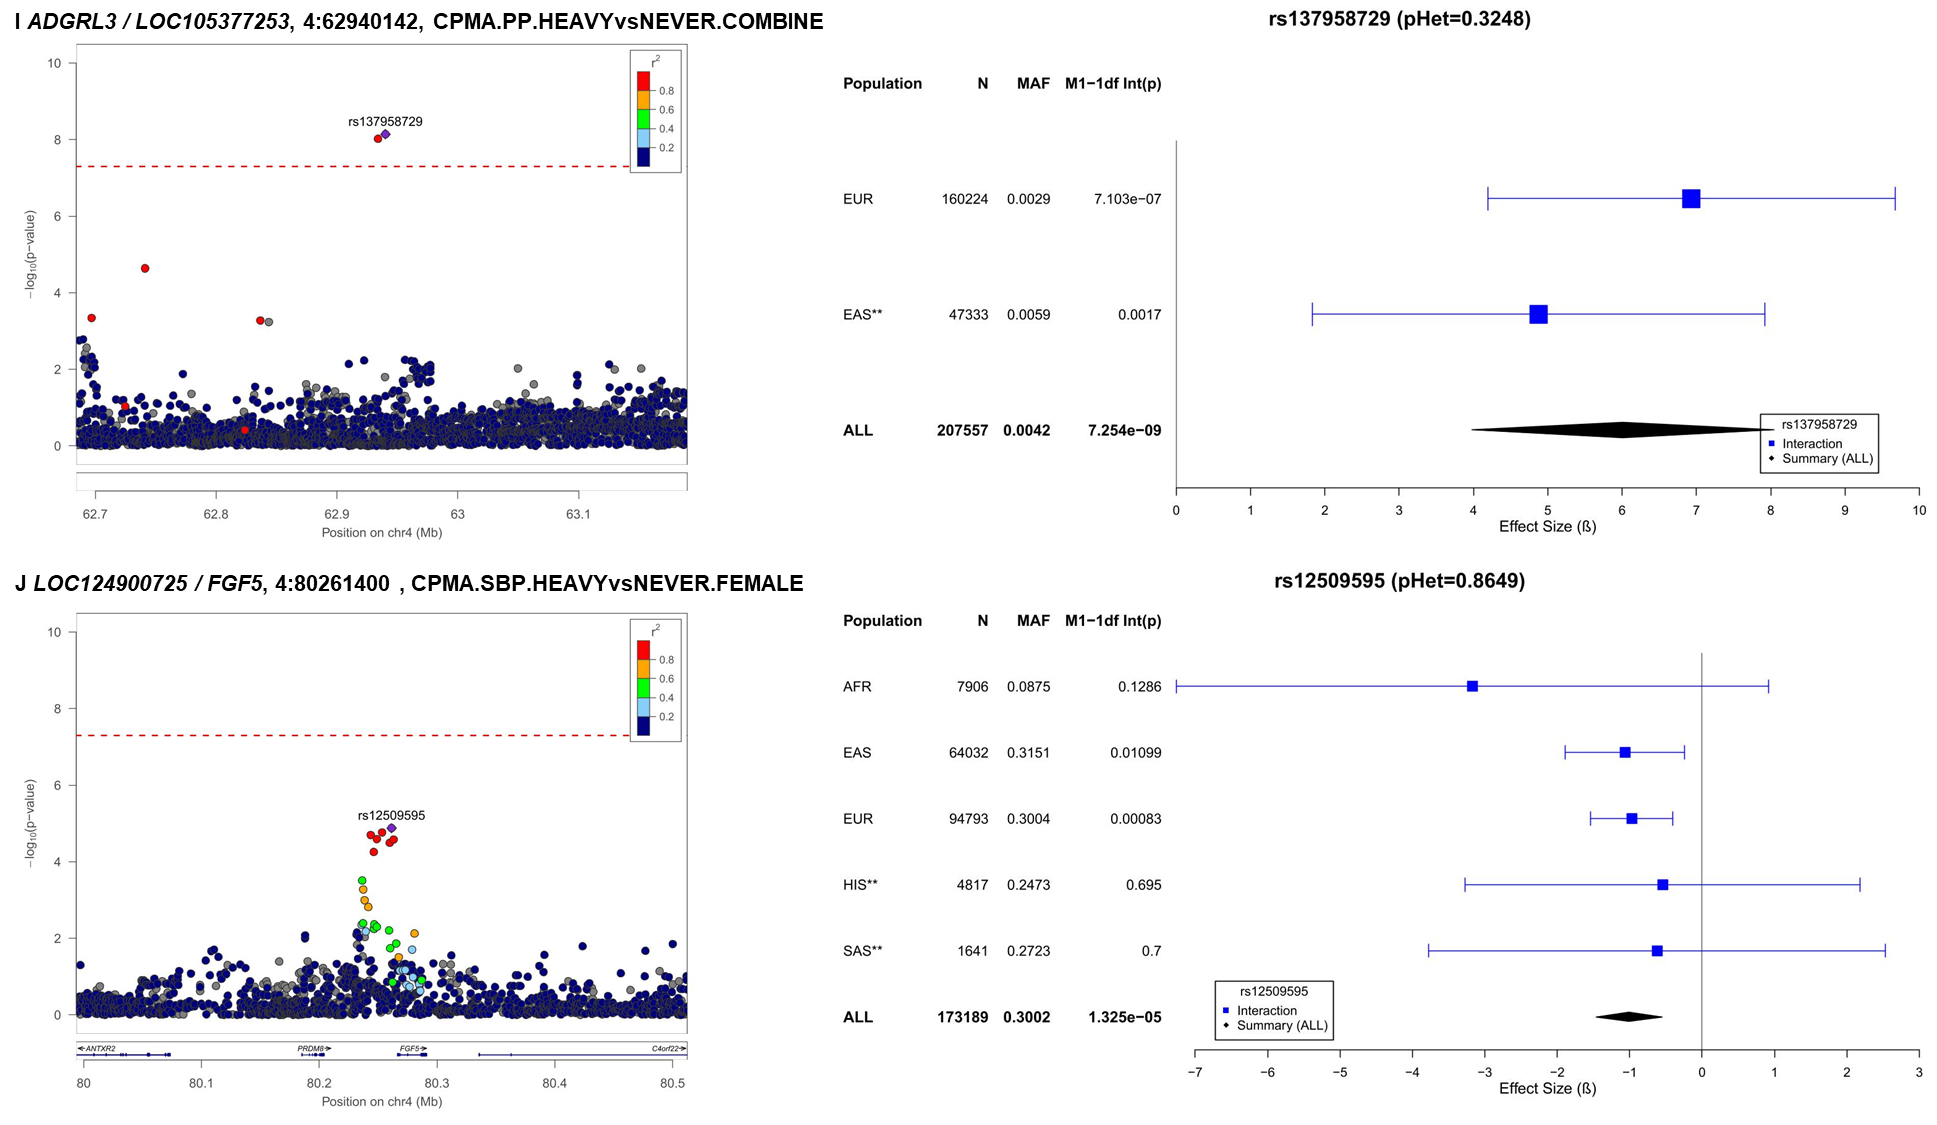


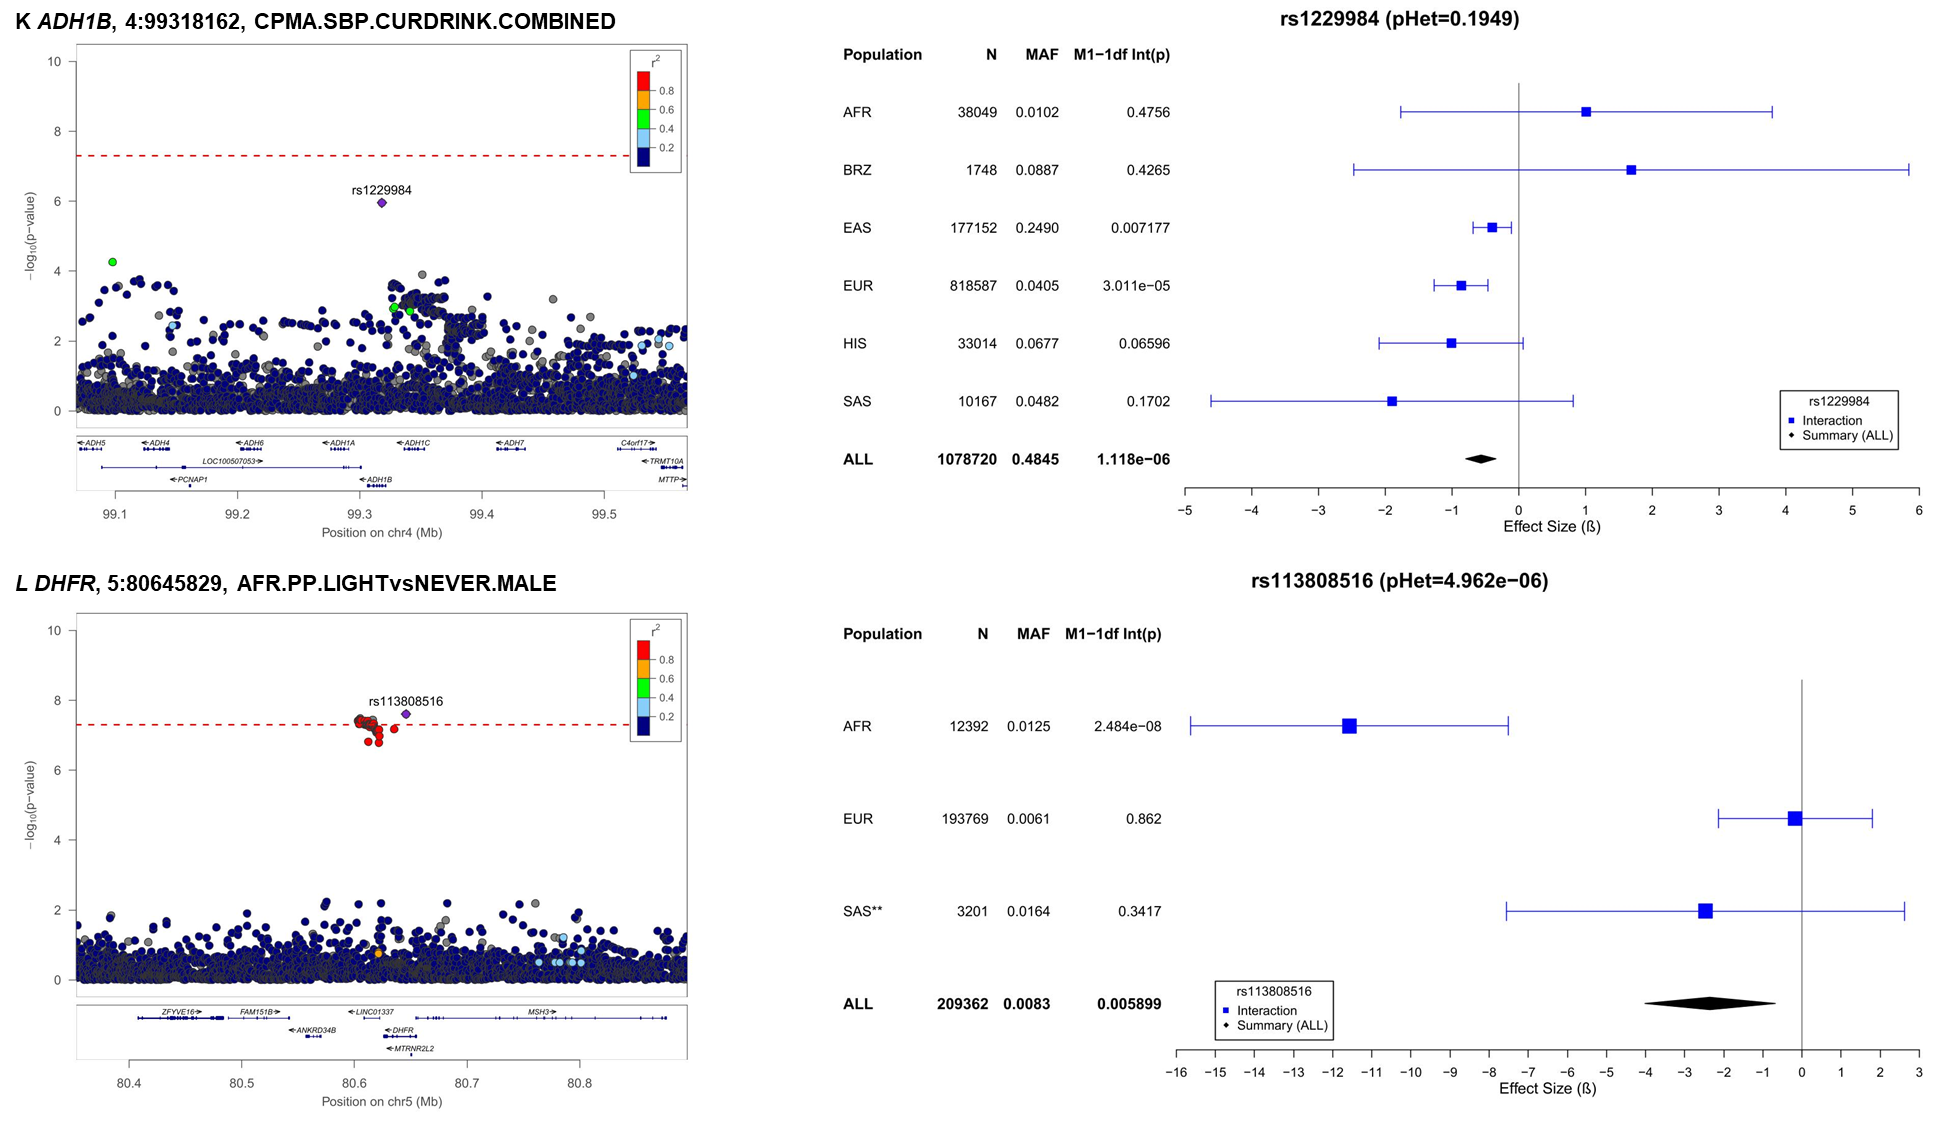


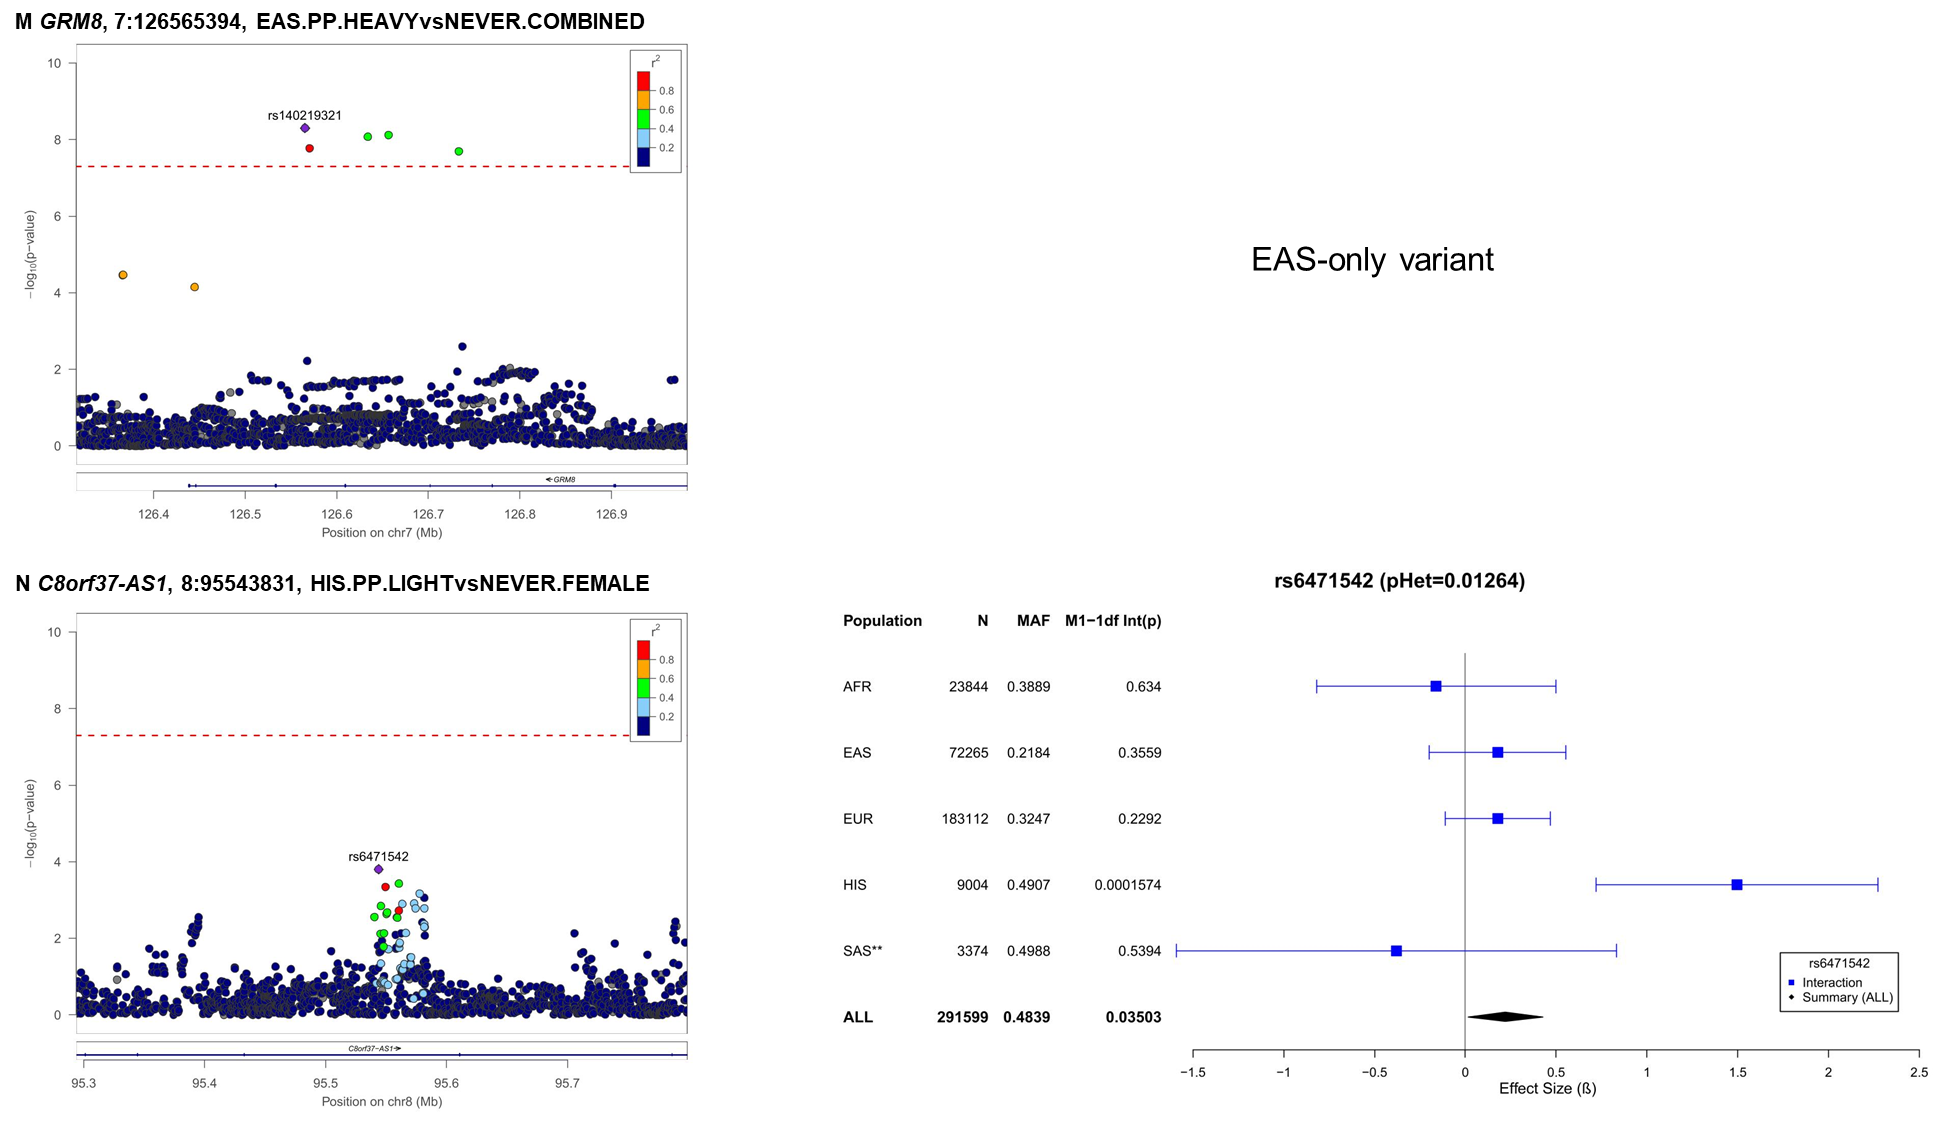


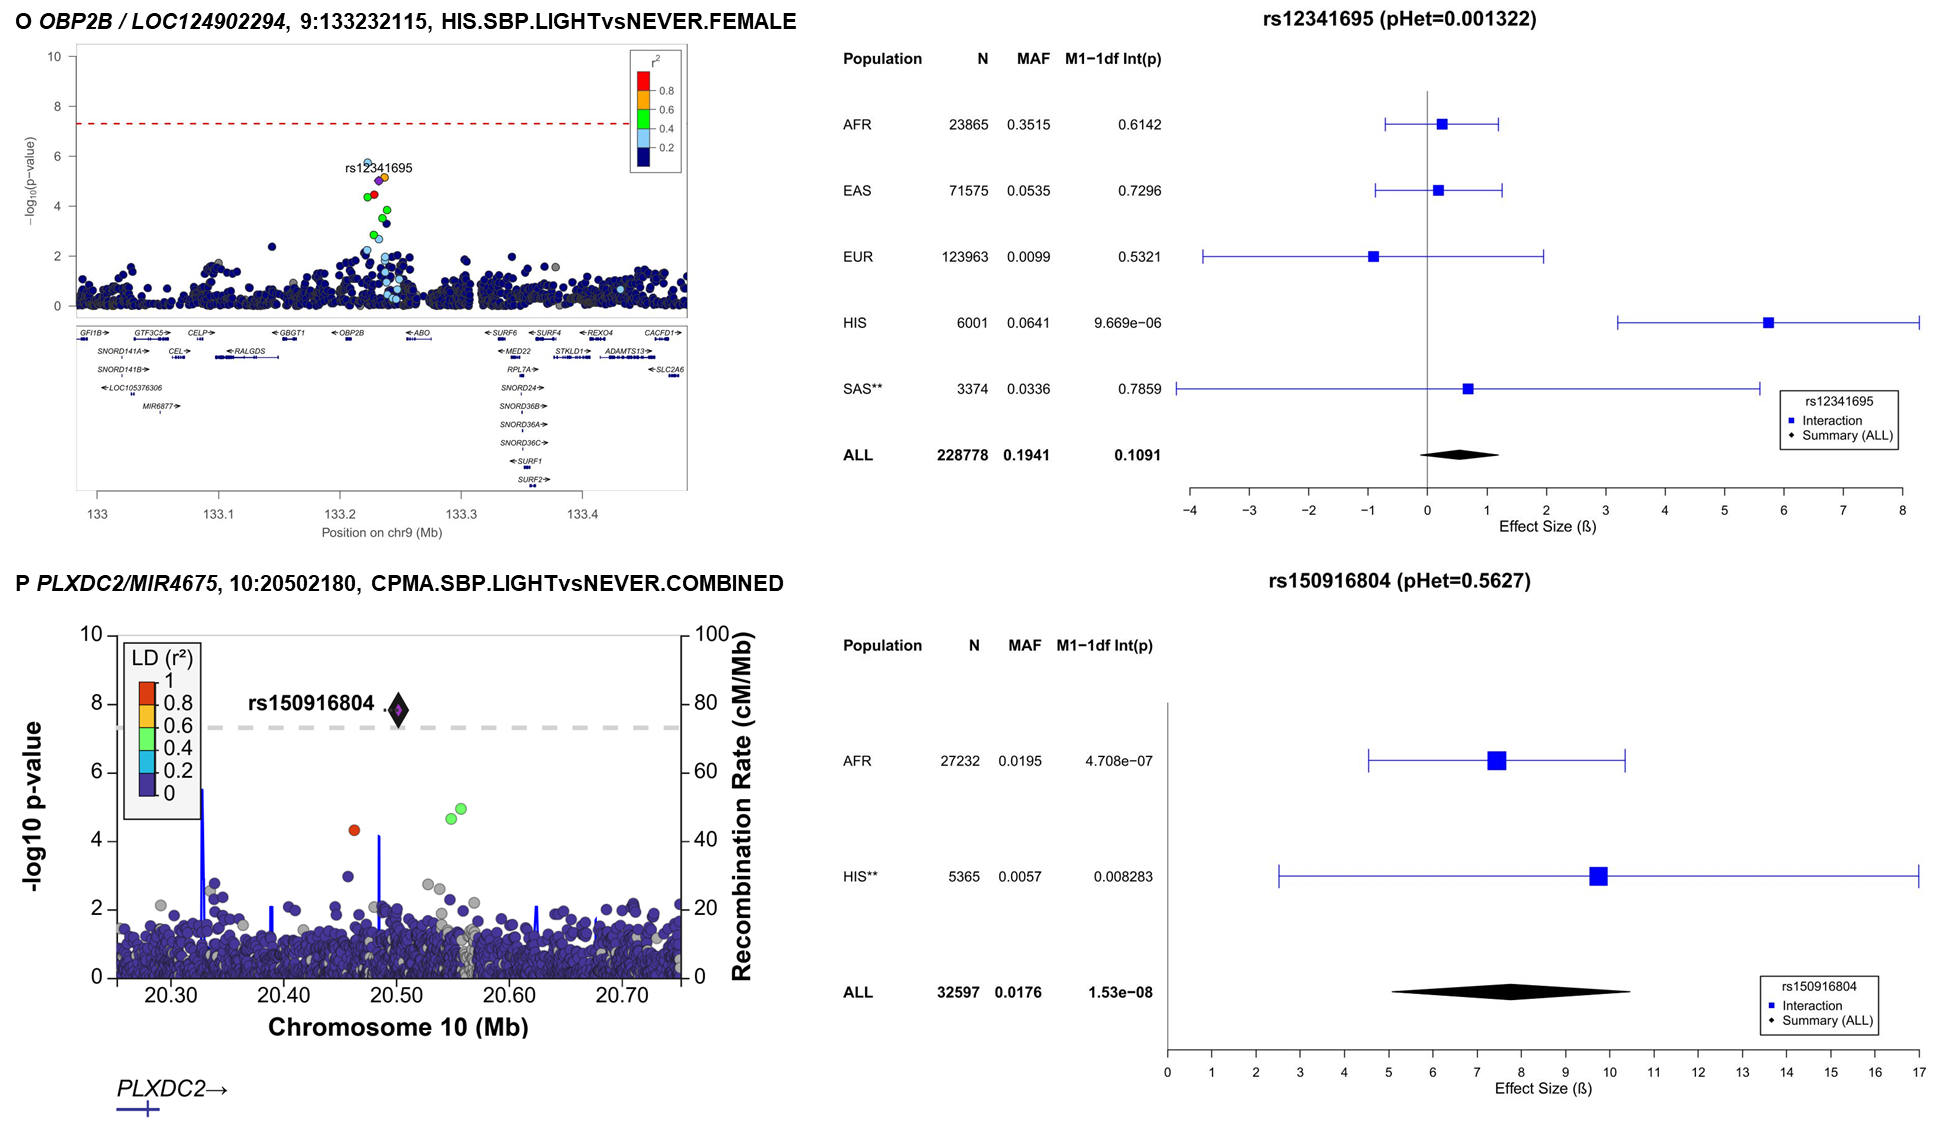


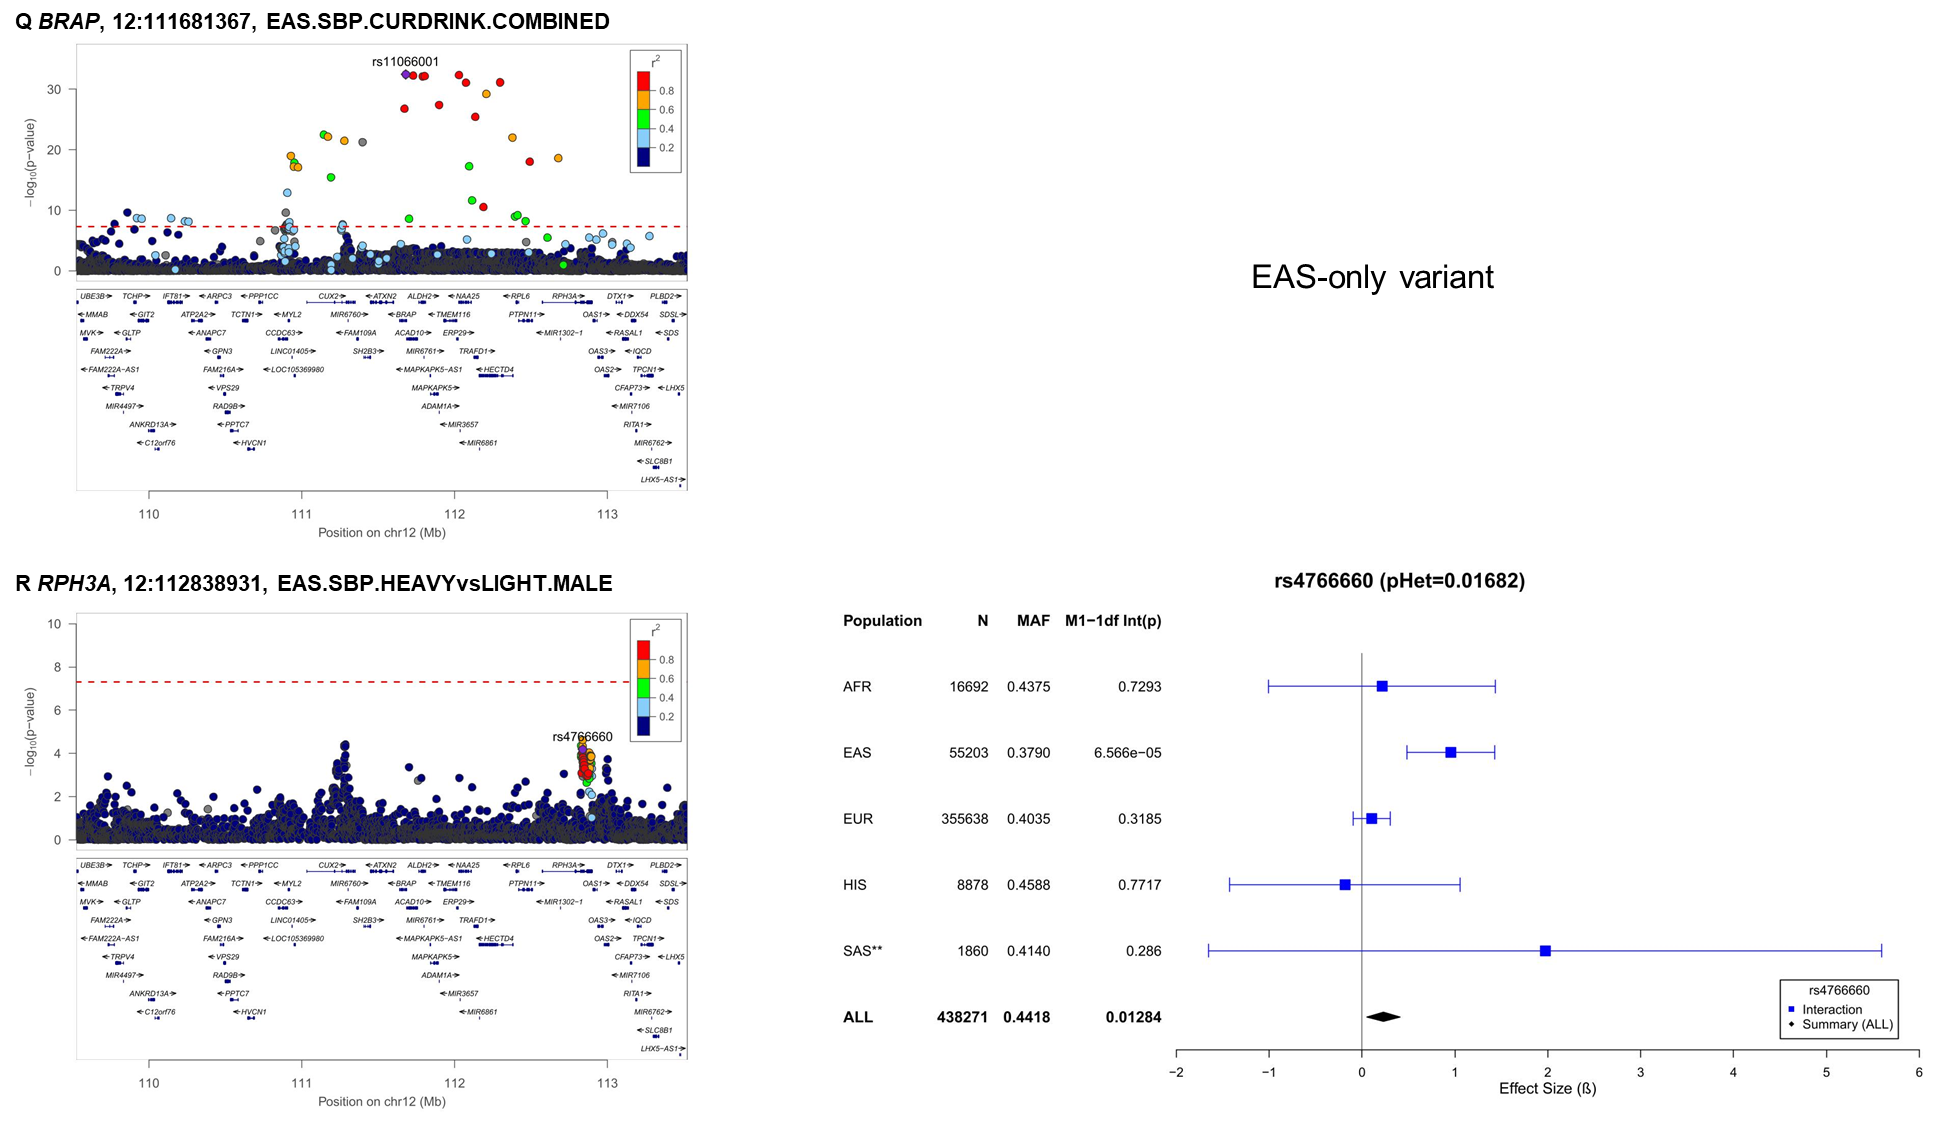


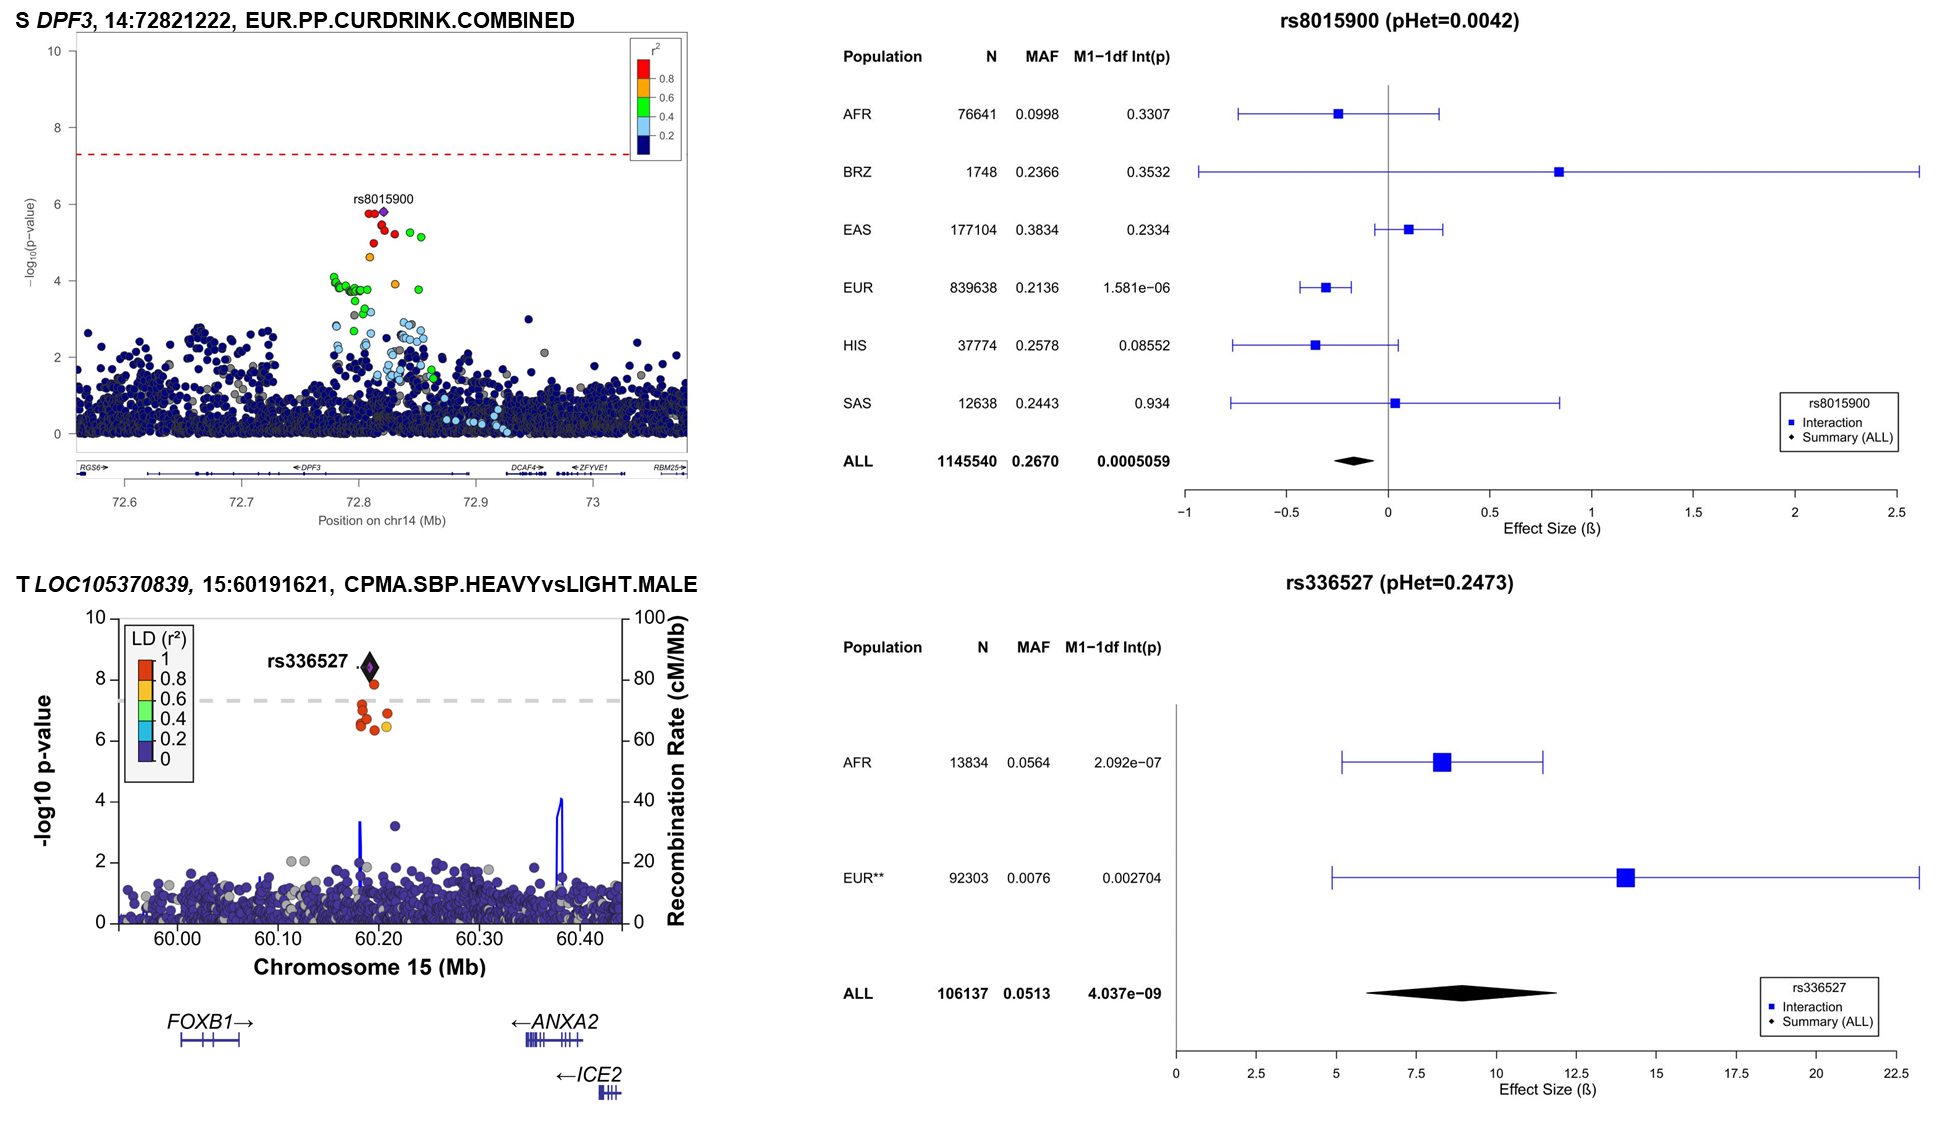


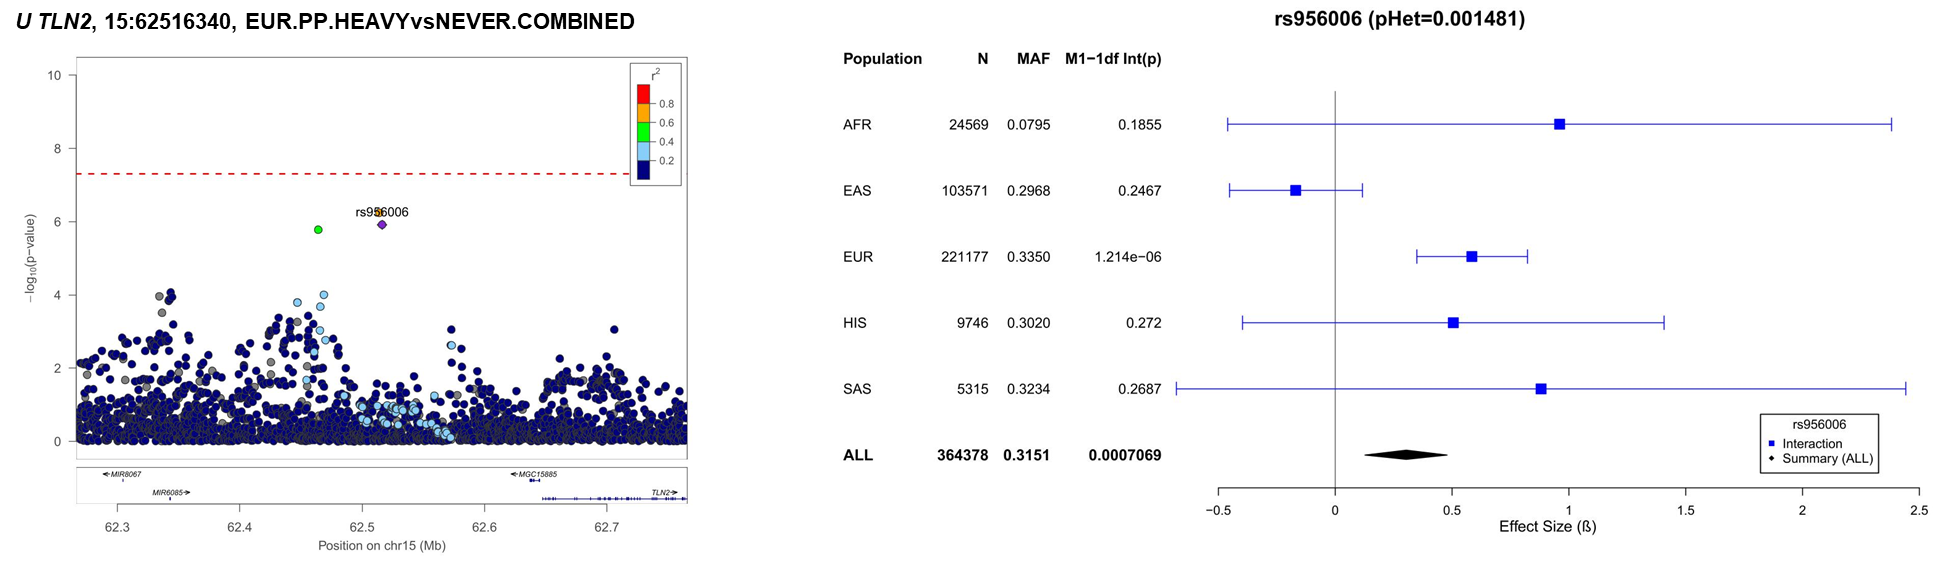

Supplement: Supplementary file 7 [file ddd2c5c5b24c8574ec309a85.docx]
