# Supplementary material for: Discovery of gene-alcohol interaction loci influencing blood pressure in 1.1 million individuals from multiple populations
Source: Research Square preprint supplement (doi:10.21203/rs.3.rs-9283196/v1), 2026-04-03
Supplement: Supplementary file 1 [file 02b1b130fa1796e21704cd09.xlsx]

## Sheet: ST4. 2df all
Supplementary Table 4. Detailed results for the 2,106 significant 2df loci (Pjoint<5e-8 & FDR<5%; r2<0.1)
rsid	MarkerName	NearestGene	novel	NearestGeneDistance	chr	pos	Allele1	Allele2	Freq1	Effect	StdErr	Pmain	IntEffect	IntStdErr	Pint	IntCov	ChiSq2df	PJoint	FDRJoint	N	N_EXP	Direction	DirectionInt	HetDf	HetPVal	fileInTag	INDEP.2df.locusId	INDEP.2df.locusTag
rs11066015	12:111730205:A_G	ACAD10	known	0	12	111730205	a	g	0.1989	-0.9473	0.1625	5.55809e-09	-2.088	0.2459	2.04415e-17	-0.02625	301.176	3.112e-62	2.51878e-55	89030	55721	-??---++?-+	-??-+-++?-+	14	0.0001255	EAS.SBP.CURDRINK.MALE.regionleads	13.2	ALL.DBP.CURDRINK.COMBINED.locusleads;ALL.DBP.CURDRINK.MALE.locusleads;ALL.DBP.HEAVYvsLIGHT.COMBINED.locusleads;ALL.DBP.HEAVYvsLIGHT.MALE.locusleads;ALL.DBP.HEAVYvsNEVER.COMBINED.locusleads;ALL.DBP.LIGHTvsNEVER.COMBINED.locusleads;ALL.DBP.LIGHTvsNEVER.MALE.locusleads;ALL.PP.CURDRINK.COMBINED.locusleads;ALL.PP.CURDRINK.COMBINED.regionleads;ALL.PP.CURDRINK.MALE.locusleads;ALL.PP.CURDRINK.MALE.region…
rs11117785	1:217179072:C_T	ESRRG	known	41317	1	217179072	t	c	0.9798	4.164	0.9115	4.9171e-06	-9.772	1.559	3.65432e-10	-0.8238	40.619	2.118e-09	0.0147163	18716	5646	???????+??????++?+	???????-??????--?-	6	0.799	AFR.SBP.CURDRINK.FEMALE.locusleads	192.2	AFR.SBP.CURDRINK.FEMALE.locusleads;AFR.SBP.CURDRINK.FEMALE.regionleads
rs146516486	7:126634131:C_T	GRM8	novel-T2	0	7	126634131	t	c	0.9857	0.9978	0.268	0.000196765	-3.277	0.5533	3.16802e-09	-0.0718	36.044	2.129e-08	0.000291427	101759	24957	+??+?	-??-?	2	0.8376	EAS.PP.HEAVYvsNEVER.COMBINED.regionleads	675	EAS.PP.HEAVYvsNEVER.COMBINED.regionleads
rs336527	15:60191621:A_G	ANXA2	novel-T2	-155529	15	60191621	a	g	0.9859	-0.8734	0.5672	0.123598	8.7	1.494	5.76992e-09	-0.3204	34.444	3.316e-08	3.25143e-05	106137	19303	-?-??	+?+??	2	0.3785	ALL.SBP.HEAVYvsLIGHT.MALE.locusleads	715.1	ALL.PP.HEAVYvsNEVER.MALE.locusleads;ALL.PP.HEAVYvsNEVER.MALE.regionleads;ALL.SBP.HEAVYvsLIGHT.MALE.locusleads;ALL.SBP.HEAVYvsLIGHT.MALE.regionleads
rs3004308	9:19181239:C_T	DENND4C	known	-49525	9	19181239	t	c	0.2252	0.5379	0.1037	2.13619e-07	-0.8754	0.1504	5.86793e-09	-0.01071	36.568	1.778e-08	0.00615607	69501	32279	+++++++++++++?+++-?	------+-+----?----?	32	0.5744	AFR.DBP.CURDRINK.COMBINED.locusleads	476.3	AFR.DBP.CURDRINK.COMBINED.locusleads;AFR.DBP.CURDRINK.COMBINED.regionleads
rs58006665	8:2519003:C_G	MYOM2	novel-T3	373547	8	2519003	c	g	0.0632	-0.6846	0.1449	2.30526e-06	1.238	0.2128	5.96739e-09	-0.02097	34.932	2.598e-08	0.000121033	110850	65323	-?---	+?+-+	6	0.2411	ALL.DBP.HEAVYvsNEVER.FEMALE.regionleads	695.1	ALL.DBP.HEAVYvsNEVER.FEMALE.locusleads;ALL.DBP.HEAVYvsNEVER.FEMALE.regionleads
rs66579735	7:73530040:C_T	BCL7B	known	-6312	7	73530040	t	c	0.3662	-0.3858	0.1521	0.011197	1.47	0.2552	8.40203e-09	-0.02288	34.313	4.56e-08	0.0463629	37779	14461	+---+----	++++-++++	16	0.4348	HIS.SBP.CURDRINK.COMBINED.regionleads	729.1	HIS.SBP.CURDRINK.COMBINED.locusleads;HIS.SBP.CURDRINK.COMBINED.regionleads
rs17277113	1:172165181:C_T	DNM3	known	0	1	172165181	t	c	0.0156	4.097	0.6851	2.22934e-09	-4.197	0.7394	1.377e-08	-0.4693	35.888	4.208e-08	0.000401601	64238	56758	?+??????+?????+??+???	?-??????-?????-??-???	6	0.7941	EUR.DBP.HEAVYvsNEVER.FEMALE.locusleads	507.2	EUR.DBP.HEAVYvsNEVER.FEMALE.locusleads;EUR.DBP.HEAVYvsNEVER.FEMALE.regionleads
rs138533866	5:80604190:A_G	DHFR	known	-22035	5	80604190	a	g	0.0134	10.3	1.756	4.47502e-09	-10.93	1.952	2.15113e-08	-3.081	34.989	2.72e-08	0.0119548	12392	10451	???????+?+	???????-?-	2	0.7958	AFR.PP.LIGHTvsNEVER.MALE.regionleads	700.1	AFR.PP.LIGHTvsNEVER.MALE.locusleads;AFR.PP.LIGHTvsNEVER.MALE.regionleads
rs9498580	6:101416978:C_T	GRIK2	novel-T2	0	6	101416978	t	c	0.2445	0.8043	0.1435	2.08402e-08	-1.074	0.2034	1.29018e-07	-0.02058	34.94	4.667e-08	0.000360772	64648	32276	+?+++-+	-?---+-	10	0.7036	EAS.PP.LIGHTvsNEVER.COMBINED.regionleads	730.1	EAS.PP.LIGHTvsNEVER.COMBINED.locusleads;EAS.PP.LIGHTvsNEVER.COMBINED.regionleads
rs150049407	15:60212158:A_G	ANXA2	novel-T2	-134992	15	60212158	a	g	0.9849	-7.49	1.288	6.05551e-09	8.004	1.55	2.41894e-07	-1.655	34.199	4.029e-08	0.0130055	11638	9217	?-?????-??	?+?????+??	2	0.881	AFR.PP.LIGHTvsNEVER.MALE.regionleads	715.2	AFR.PP.LIGHTvsNEVER.MALE.locusleads;AFR.PP.LIGHTvsNEVER.MALE.regionleads
rs28890775	8:51295062:C_T	PXDNL	known	-24514	8	51295062	t	c	0.0031	0.2177	0.3373	0.518655	3.67	0.7437	8.02389e-07	-0.1136	34.783	2.799e-08	1.2074e-05	326989	122965	+?-??	+?+??	2	0.4987	ALL.PP.HEAVYvsLIGHT.COMBINED.locusleads	256.2	ALL.PP.HEAVYvsLIGHT.COMBINED.locusleads
rs10952768	7:148621485:C_T	C7orf33	novel-T2	5625	7	148621485	t	c	0.7058	-0.4596	0.08015	9.79458e-09	0.4006	0.08773	4.96449e-06	-0.006423	35.595	1.864e-08	5.60741e-05	325958	270119	----+	-+++-	8	0.02534	ALL.DBP.LIGHTvsNEVER.MALE.regionleads	666.1	ALL.DBP.LIGHTvsNEVER.MALE.locusleads;ALL.DBP.LIGHTvsNEVER.MALE.regionleads
rs12381396	7:1007141:A_G	C7orf50	known	0	7	1007141	a	g	0.8385	-0.7071	0.09963	1.27255e-12	0.627	0.1377	5.27916e-06	-0.00992	51.07	8.135e-12	6.97621e-08	270691	172378	----+	++++-	8	0.9977	ALL.SBP.LIGHTvsNEVER.FEMALE.locusleads	355.2	ALL.DBP.CURDRINK.COMBINED.locusleads;ALL.DBP.CURDRINK.FEMALE.locusleads;ALL.DBP.CURDRINK.FEMALE.regionleads;ALL.DBP.HEAVYvsNEVER.COMBINED.locusleads;ALL.DBP.HEAVYvsNEVER.FEMALE.locusleads;ALL.DBP.LIGHTvsNEVER.COMBINED.locusleads;ALL.DBP.LIGHTvsNEVER.FEMALE.locusleads;ALL.SBP.CURDRINK.COMBINED.locusleads;ALL.SBP.CURDRINK.COMBINED.regionleads;ALL.SBP.CURDRINK.FEMALE.locusleads;ALL.SBP.CURDRINK.FEMA…
rs10139792	14:67157866:C_T	GPHN	known	0	14	67157866	t	c	0.1019	0.2728	0.04813	1.44489e-08	-0.4022	0.09175	1.16707e-05	-0.002296	34.949	2.575e-08	1.12112e-05	688950	200560	+++++	----+	8	0.8426	ALL.PP.HEAVYvsLIGHT.COMBINED.regionleads	694.1	ALL.PP.HEAVYvsLIGHT.COMBINED.locusleads;ALL.PP.HEAVYvsLIGHT.COMBINED.regionleads
rs72752651	9:125914346:C_T	PBX3	known	0	9	125914346	t	c	0.9134	0.7345	0.1364	7.2486e-08	-0.6117	0.1475	3.36686e-05	-0.0186	33.791	4.596e-08	5.00705e-05	464733	389339	+?+++	-?---	6	0.641	ALL.PP.LIGHTvsNEVER.COMBINED.regionleads	90.7	ALL.PP.LIGHTvsNEVER.COMBINED.locusleads;ALL.PP.LIGHTvsNEVER.COMBINED.regionleads
rs551676206	4:99097938:A_C	LOC100507053	known	0	4	99097938	a	c	0.985	0.01172	0.2352	0.960258	1.209	0.299	5.2664e-05	-0.05476	42.28	6.593e-10	4.33572e-07	677268	494997	-??+-+	+??++-	6	0.7415	ALL.SBP.CURDRINK.COMBINED.locusleads	202.2	ALL.PP.CURDRINK.COMBINED.locusleads;ALL.PP.HEAVYvsLIGHT.COMBINED.locusleads;ALL.SBP.CURDRINK.COMBINED.locusleads;ALL.SBP.HEAVYvsLIGHT.COMBINED.locusleads
rs76480984	21:19544123:C_T	LOC101927797	novel-T2	784311	21	19544123	t	c	0.9102	2.88	0.5087	1.50064e-08	-2.335	0.5844	6.4544e-05	-0.2571	35.282	2.351e-08	0.0119548	19225	14163	++-+++?+++	+-+---?---	16	0.6834	AFR.PP.LIGHTvsNEVER.MALE.regionleads	689.1	AFR.PP.LIGHTvsNEVER.MALE.locusleads;AFR.PP.LIGHTvsNEVER.MALE.regionleads
rs72508681	7:77108751:C_T	CCDC146	novel-T3	-13865	7	77108751	t	c	0.7829	-0.2226	0.03848	7.25886e-09	0.1871	0.04702	6.91598e-05	-0.00148	35.188	2.285e-08	1.2002e-05	1138500	760823	-?----	-?++++	8	0.1566	ALL.PP.CURDRINK.COMBINED.regionleads	682.1	ALL.PP.CURDRINK.COMBINED.locusleads;ALL.PP.CURDRINK.COMBINED.regionleads
rs4903064	14:72812712:C_T	DPF3	known	0	14	72812712	t	c	0.7716	-0.3636	0.05015	4.16005e-13	0.2263	0.0571	7.39448e-05	-0.002512	77.468	9.493e-15	1.82291e-11	834470	631013	-+-----+++--+-?-?----+-++--+--+++--++++-+-----+-+---??-------++	---++---+--+++?+?+-++-++++--++---+++--++-+++++-+-++-??+++++++-+	116	0.4381	EUR.PP.CURDRINK.COMBINED.locusleads	251.1	ALL.PP.CURDRINK.COMBINED.locusleads;ALL.PP.CURDRINK.COMBINED.regionleads;ALL.PP.CURDRINK.MALE.locusleads;ALL.PP.CURDRINK.MALE.regionleads;EUR.PP.CURDRINK.COMBINED.locusleads;EUR.PP.CURDRINK.COMBINED.regionleads;EUR.PP.CURDRINK.FEMALE.locusleads;EUR.PP.CURDRINK.FEMALE.regionleads;EUR.PP.CURDRINK.MALE.locusleads;EUR.PP.CURDRINK.MALE.regionleads;EUR.PP.LIGHTvsNEVER.COMBINED.locusleads;EUR.PP.LIGHTvs…
rs62307298	4:99344393:C_G	ADH1C	known	0	4	99344393	c	g	0.6634	0.02314	0.03237	0.474696	-0.1508	0.03892	0.000106794	-0.001046	35.129	2.354e-08	1.10949e-05	1049900	698201	-?+++-	-?----	8	0.7749	ALL.DBP.CURDRINK.COMBINED.locusleads	202.3	ALL.DBP.CURDRINK.COMBINED.locusleads;ALL.DBP.CURDRINK.COMBINED.regionleads
rs8027450	15:90875164:C_T	FURIN	known	0	15	90875164	t	c	0.2743	0.363	0.05455	2.8437e-11	0.2457	0.06471	0.000146493	-0.002973	348.523	2.086e-76	2.37283e-71	1141740	765184	-+++++	++++++	10	0.0901	ALL.SBP.CURDRINK.COMBINED.regionleads	12.1	ALL.DBP.CURDRINK.COMBINED.locusleads;ALL.DBP.CURDRINK.COMBINED.regionleads;ALL.DBP.CURDRINK.FEMALE.locusleads;ALL.DBP.CURDRINK.FEMALE.regionleads;ALL.DBP.CURDRINK.MALE.locusleads;ALL.DBP.CURDRINK.MALE.regionleads;ALL.DBP.HEAVYvsLIGHT.COMBINED.locusleads;ALL.DBP.HEAVYvsLIGHT.COMBINED.regionleads;ALL.DBP.HEAVYvsLIGHT.FEMALE.locusleads;ALL.DBP.HEAVYvsLIGHT.FEMALE.regionleads;ALL.DBP.HEAVYvsLIGHT.MAL…
rs10100578	8:105459678:A_G	ZFPM2	known	0	8	105459678	a	g	0.547	-0.2294	0.04036	1.31699e-08	0.1791	0.04742	0.0001588	-0.001628	36.341	1.284e-08	1.38212e-05	625802	452589	-----	++++-	8	0.4954	ALL.DBP.LIGHTvsNEVER.COMBINED.locusleads	188.5	ALL.DBP.HEAVYvsNEVER.COMBINED.locusleads;ALL.DBP.HEAVYvsNEVER.COMBINED.regionleads;ALL.DBP.LIGHTvsNEVER.COMBINED.locusleads
rs13215309	6:163329381:A_C	PACRG-AS1	known	4908	6	163329381	a	c	0.1202	-1.003	0.1974	3.75347e-07	0.7721	0.2105	0.000244519	-0.03895	35.721	1.751e-08	3.20967e-05	141268	123224	-?-?-	-?+?-	4	0.3488	ALL.DBP.HEAVYvsNEVER.COMBINED.regionleads	661	ALL.DBP.HEAVYvsNEVER.COMBINED.regionleads;EUR.DBP.HEAVYvsNEVER.COMBINED.regionleads
rs696	14:35401887:C_T	NFKBIA	known	0	14	35401887	t	c	0.3807	0.04504	0.0311	0.147552	0.1396	0.03823	0.000260629	-0.0009661	70.648	4.56e-16	9.09898e-13	1150970	768111	+-+++-	-+++++	10	0.5531	ALL.PP.CURDRINK.COMBINED.locusleads	214.1	ALL.PP.CURDRINK.COMBINED.locusleads;ALL.PP.CURDRINK.COMBINED.regionleads;ALL.PP.CURDRINK.FEMALE.locusleads;ALL.PP.CURDRINK.MALE.locusleads;ALL.PP.CURDRINK.MALE.regionleads;ALL.PP.HEAVYvsLIGHT.COMBINED.locusleads;ALL.PP.HEAVYvsLIGHT.COMBINED.regionleads;ALL.PP.HEAVYvsLIGHT.FEMALE.locusleads;ALL.PP.HEAVYvsLIGHT.FEMALE.regionleads;ALL.PP.HEAVYvsLIGHT.MALE.locusleads;ALL.PP.HEAVYvsLIGHT.MALE.regionle…
rs3828591	5:32713002:C_G	NPR3	known	0	5	32713002	c	g	0.3588	-0.2068	0.04887	2.31999e-05	-0.2144	0.05883	0.000268017	-0.002386	182.621	2.21e-40	4.80516e-36	1149220	767986	-----+	-++-+-	10	0.0007286	ALL.SBP.CURDRINK.COMBINED.locusleads	7.2	ALL.DBP.CURDRINK.COMBINED.locusleads;ALL.DBP.CURDRINK.FEMALE.locusleads;ALL.DBP.CURDRINK.MALE.locusleads;ALL.DBP.HEAVYvsLIGHT.COMBINED.locusleads;ALL.DBP.HEAVYvsLIGHT.FEMALE.locusleads;ALL.DBP.HEAVYvsLIGHT.MALE.locusleads;ALL.DBP.HEAVYvsNEVER.COMBINED.locusleads;ALL.DBP.LIGHTvsNEVER.COMBINED.locusleads;ALL.DBP.LIGHTvsNEVER.FEMALE.locusleads;ALL.PP.CURDRINK.COMBINED.locusleads;ALL.PP.CURDRINK.FEMA…
rs7167634	15:43632942:A_G	CATSPER2	known	0	15	43632942	a	g	0.6814	-0.03184	0.02991	0.28709	-0.1356	0.03782	0.000336556	-0.0008925	52.97	3.145e-12	3.60612e-09	1010440	659311	+?+---	-?----	8	0.9162	ALL.DBP.CURDRINK.COMBINED.locusleads	348.1	ALL.DBP.CURDRINK.COMBINED.locusleads;ALL.DBP.CURDRINK.COMBINED.regionleads;ALL.DBP.HEAVYvsLIGHT.COMBINED.locusleads;ALL.DBP.HEAVYvsLIGHT.COMBINED.regionleads;EUR.DBP.CURDRINK.COMBINED.locusleads;EUR.DBP.CURDRINK.COMBINED.regionleads;EUR.DBP.HEAVYvsLIGHT.COMBINED.locusleads;EUR.DBP.HEAVYvsLIGHT.COMBINED.regionleads
rs2317240	16:81464102:C_T	CMIP	known	0	16	81464102	t	c	0.5722	0.2507	0.04626	5.98098e-08	-0.1882	0.05284	0.000368467	-0.002138	35.282	2.181e-08	2.16634e-05	560942	435321	+++++	-----	8	0.8709	ALL.DBP.LIGHTvsNEVER.COMBINED.locusleads	217.4	ALL.DBP.LIGHTvsNEVER.COMBINED.locusleads
rs74442448	8:9073796:G_T	MIR4660	known	25278	8	9073796	t	g	0.0986	0.5048	0.07686	5.1069e-11	-0.3321	0.09348	0.000381398	-0.005889	53.356	2.594e-12	2.72257e-09	1117020	747903	+++++-	++----	10	0.08804	ALL.SBP.CURDRINK.COMBINED.locusleads	97.13	ALL.PP.CURDRINK.COMBINED.locusleads;ALL.SBP.CURDRINK.COMBINED.locusleads
rs111415059	10:44578859:A_G	CXCL12	known	193762	10	44578859	a	g	0.2297	0.2322	0.03709	3.83874e-10	-0.1568	0.04494	0.000484656	-0.001373	47.884	4e-11	3.77916e-08	1143990	764753	++++++	------	10	0.6154	ALL.PP.CURDRINK.COMBINED.regionleads	253.2	ALL.PP.CURDRINK.COMBINED.locusleads;ALL.PP.CURDRINK.COMBINED.regionleads;ALL.PP.CURDRINK.FEMALE.locusleads;ALL.PP.CURDRINK.FEMALE.regionleads;ALL.PP.HEAVYvsNEVER.COMBINED.locusleads;ALL.PP.HEAVYvsNEVER.COMBINED.regionleads
rs6546787	2:72856920:C_T	SPR	known	-30462	2	72856920	t	c	0.7263	0.004215	0.03174	0.894353	0.133	0.03828	0.000511999	-0.001005	40.702	1.451e-09	9.45396e-07	1141880	764363	+--+++	++++++	10	0.864	ALL.DBP.CURDRINK.COMBINED.locusleads	377.2	ALL.DBP.CURDRINK.COMBINED.locusleads;ALL.DBP.HEAVYvsLIGHT.COMBINED.locusleads
rs11711045	3:53677809:A_G	CACNA1D	known	0	3	53677809	a	g	0.7197	-0.02848	0.02883	0.323221	-0.122	0.03545	0.000578569	-0.0008307	54.033	1.848e-12	2.23195e-09	1148440	766197	+-+-+-	-+---+	10	0.2588	ALL.DBP.CURDRINK.COMBINED.locusleads	50.6	ALL.DBP.CURDRINK.COMBINED.locusleads;ALL.DBP.CURDRINK.MALE.locusleads;ALL.DBP.HEAVYvsLIGHT.COMBINED.locusleads;ALL.DBP.HEAVYvsLIGHT.MALE.locusleads;ALL.DBP.LIGHTvsNEVER.COMBINED.locusleads;ALL.SBP.CURDRINK.COMBINED.locusleads;ALL.SBP.HEAVYvsLIGHT.COMBINED.locusleads;ALL.SBP.LIGHTvsNEVER.COMBINED.locusleads;EUR.DBP.CURDRINK.MALE.locusleads;EUR.DBP.CURDRINK.MALE.regionleads
rs3825202	12:112843816:A_G	RPH3A	known	0	12	112843816	a	g	0.4061	-0.215	0.08935	0.0161165	-0.519	0.1511	0.000592966	-0.007979	42.046	2.726e-09	1.56476e-05	129511	49545	--+---+	----+--	12	0.5707	EAS.SBP.LIGHTvsNEVER.COMBINED.locusleads	13.12	EAS.SBP.HEAVYvsLIGHT.COMBINED.locusleads;EAS.SBP.HEAVYvsLIGHT.MALE.locusleads;EAS.SBP.LIGHTvsNEVER.COMBINED.locusleads;EAS.SBP.LIGHTvsNEVER.MALE.locusleads
rs558332143	8:75197055:C_CT	CASC9	known	-26061	8	75197055	ct	c	0.9711	-1.425	0.2691	1.18737e-07	1.056	0.3078	0.000601806	-0.07244	34.156	3.83e-08	6.38089e-05	206034	152613	-?---	-?+++	6	0.3243	ALL.PP.HEAVYvsNEVER.COMBINED.locusleads	68.14	ALL.PP.HEAVYvsNEVER.COMBINED.locusleads
rs572529	1:20609683:C_T	CDA	known	0	1	20609683	t	c	0.2936	-0.5798	0.09706	2.32039e-09	0.5646	0.1646	0.000603284	-0.009417	35.701	2.692e-08	0.00148181	55199	19656	-----	++++-	8	0.1205	EAS.PP.HEAVYvsLIGHT.MALE.locusleads	698.1	EAS.PP.HEAVYvsLIGHT.MALE.locusleads;EAS.PP.HEAVYvsLIGHT.MALE.regionleads
rs56169418	11:116225685:C_CACTG	LINC00900	known	465485	11	116225685	cactg	c	0.2973	-0.00775	0.05066	0.878414	-0.2157	0.06325	0.00064897	-0.002562	34.638	3.009e-08	1.34664e-05	1050240	692289	-?+-+-	-?+--+	8	0.06656	ALL.SBP.CURDRINK.COMBINED.locusleads	710.1	ALL.SBP.CURDRINK.COMBINED.locusleads;ALL.SBP.CURDRINK.COMBINED.regionleads
rs6597257	6:7209018:A_G	RREB1	known	0	6	7209018	a	g	0.551	0.2492	0.04211	3.26208e-09	-0.1629	0.04789	0.00067006	-0.001773	49.236	1.131e-09	8.20845e-07	840889	635868	+++-++-++-++-++---++++-+-+-+-+-+++--+--+++--++++--+-??++++-++--	---++-+-++--++-+++---++-+-+-+-----+--++---++-------+??----+--++	120	0.5663	EUR.PP.CURDRINK.COMBINED.locusleads	307.2	EUR.PP.CURDRINK.COMBINED.locusleads
rs7903146	10:112998590:C_T	TCF7L2	known	0	10	112998590	t	c	0.2483	0.3263	0.03903	6.25931e-17	-0.1568	0.04635	0.000717102	-0.001522	115.555	8.083e-26	4.53059e-22	1143100	766864	++++++	-++-+-	10	0.7899	ALL.PP.CURDRINK.COMBINED.regionleads	94.1	ALL.PP.CURDRINK.COMBINED.locusleads;ALL.PP.CURDRINK.COMBINED.regionleads;ALL.PP.CURDRINK.FEMALE.locusleads;ALL.PP.CURDRINK.FEMALE.regionleads;ALL.PP.CURDRINK.MALE.locusleads;ALL.PP.CURDRINK.MALE.regionleads;ALL.PP.HEAVYvsLIGHT.COMBINED.locusleads;ALL.PP.HEAVYvsLIGHT.COMBINED.regionleads;ALL.PP.HEAVYvsLIGHT.MALE.locusleads;ALL.PP.HEAVYvsLIGHT.MALE.regionleads;ALL.PP.HEAVYvsNEVER.COMBINED.locuslead…
rs66666124	5:158965694:A_G	EBF1	known	0	5	158965694	a	g	0.1539	0.01807	0.03778	0.63244	0.1511	0.04553	0.000904405	-0.001427	44.514	2.157e-10	1.69733e-07	1140420	764885	++-+--	++++++	10	0.1436	ALL.DBP.CURDRINK.COMBINED.locusleads	60.14	ALL.DBP.CURDRINK.COMBINED.locusleads;ALL.DBP.HEAVYvsLIGHT.COMBINED.locusleads;EUR.DBP.CURDRINK.COMBINED.locusleads
rs151118177	11:130071867:C_CT	APLP2	known	0	11	130071867	ct	c	0.0463	0.1793	0.0739	0.0152557	0.4652	0.1408	0.000953236	-0.005458	34.797	2.779e-08	1.19953e-05	580134	167896	+?+-?	+?++?	4	0.6832	ALL.PP.HEAVYvsLIGHT.COMBINED.locusleads	4.14	ALL.PP.HEAVYvsLIGHT.COMBINED.locusleads
rs77594100	8:63211536:A_C	YTHDF3	known	0	8	63211536	a	c	0.0315	-0.3066	0.1117	0.00605381	-0.7248	0.2229	0.00114724	-0.01247	36.085	1.46e-08	6.32045e-06	619326	172710	??--?	??-+?	2	0.47	ALL.SBP.HEAVYvsLIGHT.COMBINED.regionleads	646.1	ALL.SBP.HEAVYvsLIGHT.COMBINED.locusleads;ALL.SBP.HEAVYvsLIGHT.COMBINED.regionleads
rs6899715	6:117695611:A_G	NUS1	known	0	6	117695611	a	g	0.1537	-0.1504	0.0453	0.00089989	-0.2922	0.09117	0.00135062	-0.002051	42.286	7.466e-09	2.07698e-05	269561	71826	--++--+-???---++----?++++---++---+-?-?----++	-+--+--+???-----+-++?+--++-----+--+?+?--++-+	74	0.2742	EUR.DBP.HEAVYvsLIGHT.FEMALE.locusleads	416.4	EUR.DBP.HEAVYvsLIGHT.FEMALE.locusleads;EUR.DBP.HEAVYvsLIGHT.FEMALE.regionleads
rs693974	20:10576604:C_T	SLX4IP	known	0	20	10576604	t	c	0.568	0.1307	0.03059	1.93174e-05	0.1206	0.03766	0.00136318	-0.0009351	148.517	5.622e-33	5.48403e-29	1147000	765041	+-++++	-++++-	10	0.1277	ALL.PP.CURDRINK.COMBINED.locusleads	20.3	ALL.DBP.CURDRINK.COMBINED.locusleads;ALL.DBP.CURDRINK.FEMALE.locusleads;ALL.DBP.CURDRINK.MALE.locusleads;ALL.DBP.HEAVYvsLIGHT.COMBINED.locusleads;ALL.DBP.HEAVYvsLIGHT.FEMALE.locusleads;ALL.DBP.HEAVYvsLIGHT.MALE.locusleads;ALL.DBP.HEAVYvsNEVER.COMBINED.locusleads;ALL.DBP.LIGHTvsNEVER.COMBINED.locusleads;ALL.DBP.LIGHTvsNEVER.MALE.locusleads;ALL.PP.CURDRINK.COMBINED.locusleads;ALL.PP.CURDRINK.FEMALE…
rs74157129	10:104525601:C_T	CCDC147	known	70511	10	104525601	t	c	0.9849	-0.5101	0.1678	0.00236634	-1.129	0.3553	0.00148501	-0.02811	36.554	1.155e-08	5.13163e-06	580378	164423	-?--?	+?-+?	4	0.002722	ALL.SBP.HEAVYvsLIGHT.COMBINED.locusleads	308.2	ALL.SBP.HEAVYvsLIGHT.COMBINED.locusleads;ALL.SBP.HEAVYvsLIGHT.COMBINED.regionleads
rs12978215	19:12409469:C_G	ZNF799	known	8195	19	12409469	c	g	0.5664	0.00595	0.02938	0.839511	0.1101	0.0352	0.00176095	-0.000863	35.811	1.674e-08	8.22537e-06	1144430	764706	+++-++	+-+++-	10	0.07348	ALL.DBP.CURDRINK.COMBINED.regionleads	656.1	ALL.DBP.CURDRINK.COMBINED.locusleads;ALL.DBP.CURDRINK.COMBINED.regionleads;ALL.DBP.HEAVYvsLIGHT.COMBINED.locusleads;ALL.DBP.HEAVYvsLIGHT.COMBINED.regionleads
rs4660729	1:43302229:C_G	TIE1	known	0	1	43302229	c	g	0.3605	0.1631	0.03657	8.19827e-06	0.2295	0.07348	0.00178836	-0.001337	57.813	2.793e-13	3.35863e-10	747997	207861	-++-+	+-++-	8	0.01581	ALL.SBP.HEAVYvsLIGHT.COMBINED.regionleads	301.1	ALL.DBP.CURDRINK.COMBINED.locusleads;ALL.DBP.CURDRINK.COMBINED.regionleads;ALL.DBP.CURDRINK.FEMALE.locusleads;ALL.DBP.CURDRINK.FEMALE.regionleads;ALL.DBP.HEAVYvsLIGHT.COMBINED.locusleads;ALL.DBP.HEAVYvsLIGHT.COMBINED.regionleads;ALL.DBP.HEAVYvsLIGHT.FEMALE.locusleads;ALL.DBP.HEAVYvsLIGHT.FEMALE.regionleads;ALL.PP.HEAVYvsLIGHT.COMBINED.locusleads;ALL.PP.HEAVYvsLIGHT.COMBINED.regionleads;ALL.SBP.CU…
rs12544976	8:10721562:C_T	SOX7	known	-2205	8	10721562	t	c	0.4585	-0.07242	0.04586	0.114301	-0.1727	0.05548	0.00185301	-0.002088	61.98	3.476e-14	5.05016e-11	1148500	766228	--+-+-	++---+	10	0.0186	ALL.SBP.CURDRINK.COMBINED.locusleads	97.5	ALL.SBP.CURDRINK.COMBINED.locusleads;EUR.DBP.CURDRINK.COMBINED.locusleads;EUR.DBP.HEAVYvsLIGHT.COMBINED.locusleads;EUR.DBP.HEAVYvsLIGHT.MALE.locusleads;EUR.SBP.HEAVYvsLIGHT.MALE.locusleads
rs61585154	17:48596256:A_G	HOXB-AS3,HOXB6	known	0	17	48596256	a	g	0.0341	0.01002	0.2076	0.961504	0.7455	0.2395	0.00185362	-0.04308	39.956	2.107e-09	9.70893e-06	199120	155163	-?+-?	+?++?	4	0.7014	ALL.DBP.LIGHTvsNEVER.FEMALE.regionleads	41.33	ALL.DBP.CURDRINK.COMBINED.locusleads;ALL.DBP.HEAVYvsLIGHT.COMBINED.locusleads;ALL.DBP.HEAVYvsLIGHT.FEMALE.locusleads;ALL.DBP.HEAVYvsLIGHT.FEMALE.regionleads;ALL.DBP.LIGHTvsNEVER.COMBINED.locusleads;ALL.DBP.LIGHTvsNEVER.COMBINED.regionleads;ALL.DBP.LIGHTvsNEVER.FEMALE.locusleads;ALL.DBP.LIGHTvsNEVER.FEMALE.regionleads;EUR.DBP.CURDRINK.COMBINED.locusleads;EUR.DBP.HEAVYvsLIGHT.COMBINED.locusleads;EU…
rs7843880	8:9241663:A_G	LOC157273	known	-83387	8	9241663	a	g	0.6474	-0.07019	0.02315	0.00242967	-0.1389	0.04464	0.00186102	-0.0005159	37.68	6.575e-09	3.06995e-06	749805	208379	-+--+	-----	8	0.3325	ALL.DBP.HEAVYvsLIGHT.COMBINED.locusleads	97.31	ALL.DBP.HEAVYvsLIGHT.COMBINED.locusleads
rs73075656	3:41064456:G_T	CTNNB1	known	-134994	3	41064456	t	g	0.1131	-0.2094	0.05247	6.58364e-05	-0.3152	0.1013	0.00186108	-0.00275	52.544	3.893e-12	9.39853e-09	431123	125540	-+--+	+---+	8	0.8492	ALL.PP.HEAVYvsLIGHT.MALE.regionleads	353.1	ALL.PP.CURDRINK.COMBINED.locusleads;ALL.PP.CURDRINK.COMBINED.regionleads;ALL.PP.CURDRINK.MALE.locusleads;ALL.PP.CURDRINK.MALE.regionleads;ALL.PP.HEAVYvsLIGHT.COMBINED.locusleads;ALL.PP.HEAVYvsLIGHT.COMBINED.regionleads;ALL.PP.HEAVYvsLIGHT.MALE.locusleads;ALL.PP.HEAVYvsLIGHT.MALE.regionleads;ALL.SBP.CURDRINK.MALE.locusleads;ALL.SBP.CURDRINK.MALE.regionleads;ALL.SBP.HEAVYvsLIGHT.MALE.locusleads;ALL…
rs237465	20:49417619:A_G	KCNB1	known	0	20	49417619	a	g	0.5011	0.01058	0.02654	0.690156	0.1002	0.03244	0.00200981	-0.0007031	35.238	2.23e-08	1.05754e-05	1147220	765150	+-+-+-	+++++-	10	0.8525	ALL.DBP.CURDRINK.COMBINED.locusleads	678.1	ALL.DBP.CURDRINK.COMBINED.locusleads;ALL.DBP.CURDRINK.COMBINED.regionleads;ALL.DBP.HEAVYvsLIGHT.COMBINED.locusleads;ALL.DBP.HEAVYvsLIGHT.COMBINED.regionleads
rs4691071	4:155749403:C_T	GUCY1B3	known	-9569	4	155749403	t	c	0.1637	0.7278	0.1469	7.25573e-07	-0.4866	0.1592	0.00223913	-0.02159	40.04	3.105e-08	3.88964e-05	424222	364927	++++++??++++++-+-++-++++??++++	+-----??---+--+-+--+-+--??+--+	50	0.8136	EUR.SBP.LIGHTvsNEVER.COMBINED.locusleads	77.1	EUR.SBP.LIGHTvsNEVER.COMBINED.locusleads
rs72786085	10:18424277:C_G	CACNB2	known	0	10	18424277	c	g	0.0814	-0.3206	0.07017	4.90281e-06	-0.4306	0.141	0.00225887	-0.004921	58.584	1.899e-13	2.36021e-10	654433	178765	-?---	+?---	6	0.8888	ALL.SBP.HEAVYvsLIGHT.COMBINED.locusleads	34.7	ALL.DBP.CURDRINK.COMBINED.locusleads;ALL.DBP.CURDRINK.FEMALE.locusleads;ALL.DBP.HEAVYvsLIGHT.COMBINED.locusleads;ALL.DBP.HEAVYvsLIGHT.FEMALE.locusleads;ALL.DBP.HEAVYvsNEVER.COMBINED.locusleads;ALL.SBP.CURDRINK.COMBINED.locusleads;ALL.SBP.CURDRINK.FEMALE.locusleads;ALL.SBP.HEAVYvsLIGHT.COMBINED.locusleads;ALL.SBP.HEAVYvsLIGHT.FEMALE.locusleads;ALL.SBP.HEAVYvsLIGHT.MALE.locusleads;ALL.SBP.HEAVYvsNE…
rs4243951	11:9834977:A_G	SBF2	known	0	11	9834977	a	g	0.3385	-0.0761	0.03077	0.0133914	-0.1149	0.0378	0.00236828	-0.0009463	81.606	1.903e-18	6.26455e-15	1147110	765816	-+----	-----+	10	0.7073	ALL.DBP.CURDRINK.COMBINED.locusleads	65.3	ALL.DBP.CURDRINK.COMBINED.locusleads;ALL.DBP.CURDRINK.FEMALE.locusleads;ALL.DBP.CURDRINK.MALE.locusleads;ALL.DBP.HEAVYvsLIGHT.COMBINED.locusleads;ALL.DBP.HEAVYvsLIGHT.MALE.locusleads;ALL.DBP.LIGHTvsNEVER.COMBINED.locusleads;ALL.DBP.LIGHTvsNEVER.FEMALE.locusleads;ALL.DBP.LIGHTvsNEVER.MALE.locusleads;ALL.PP.HEAVYvsLIGHT.COMBINED.locusleads;ALL.SBP.CURDRINK.COMBINED.locusleads;ALL.SBP.CURDRINK.FEMAL…
rs12341695	9:133232115:C_T	OBP2B	known	22865	9	133232115	t	c	0.945	-3.357	0.4874	5.67548e-12	2.349	0.775	0.00243771	-0.2206	48.91	2.395e-11	0.000176334	6001	1733	????--	????++	2	0.202	HIS.DBP.LIGHTvsNEVER.FEMALE.locusleads	144.3	HIS.DBP.LIGHTvsNEVER.FEMALE.locusleads;HIS.DBP.LIGHTvsNEVER.FEMALE.regionleads;HIS.SBP.LIGHTvsNEVER.FEMALE.locusleads;HIS.SBP.LIGHTvsNEVER.FEMALE.regionleads
rs57419314	3:41628386:A_G	ULK4	known	0	3	41628386	a	g	0.9604	0.6889	0.1088	2.42315e-10	-0.3729	0.1238	0.00259433	-0.01184	68.744	3.51e-13	5.34516e-10	832841	630390	-++--+??+++?+?++?-++++++??+-++--??++-+-+--+++++++---??+?+++++-+	+--++-??++-?-?--?+------??++--++??--+-+-++-------+++??-?-+--+-+	100	0.4327	EUR.PP.CURDRINK.COMBINED.locusleads	14.3	ALL.PP.CURDRINK.COMBINED.locusleads;EUR.PP.CURDRINK.COMBINED.locusleads
rs11770771	7:131506850:A_G	PODXL	known	0	7	131506850	a	g	0.4138	0.1567	0.03711	2.4152e-05	0.2175	0.07252	0.00270714	-0.001375	53.784	2.094e-12	2.10948e-09	709329	204815	+++++	+++--	8	0.9198	ALL.SBP.HEAVYvsLIGHT.COMBINED.regionleads	269.3	ALL.PP.HEAVYvsLIGHT.COMBINED.locusleads;ALL.SBP.CURDRINK.COMBINED.locusleads;ALL.SBP.HEAVYvsLIGHT.COMBINED.locusleads;ALL.SBP.HEAVYvsLIGHT.COMBINED.regionleads;ALL.SBP.HEAVYvsLIGHT.FEMALE.locusleads;ALL.SBP.HEAVYvsLIGHT.FEMALE.regionleads;ALL.SBP.HEAVYvsNEVER.COMBINED.locusleads;ALL.SBP.HEAVYvsNEVER.COMBINED.regionleads;EUR.SBP.HEAVYvsLIGHT.COMBINED.locusleads
rs1863777	2:19529370:C_T	OSR1	known	170759	2	19529370	t	c	0.2754	-0.1667	0.03722	7.50727e-06	-0.1317	0.04437	0.00299528	-0.001385	172.365	3.727e-38	4.67815e-34	1143920	765678	------	-+---+	10	0.8793	ALL.PP.CURDRINK.COMBINED.regionleads	54.1	ALL.DBP.CURDRINK.COMBINED.locusleads;ALL.DBP.CURDRINK.COMBINED.regionleads;ALL.DBP.CURDRINK.MALE.locusleads;ALL.DBP.CURDRINK.MALE.regionleads;ALL.DBP.HEAVYvsLIGHT.COMBINED.locusleads;ALL.DBP.HEAVYvsLIGHT.COMBINED.regionleads;ALL.PP.CURDRINK.COMBINED.locusleads;ALL.PP.CURDRINK.COMBINED.regionleads;ALL.PP.CURDRINK.FEMALE.locusleads;ALL.PP.CURDRINK.MALE.locusleads;ALL.PP.CURDRINK.MALE.regionleads;AL…
rs72715072	8:123837320:A_C	FER1L6	known	-14666	8	123837320	a	c	0.0967	0.0597	0.04302	0.16522	0.1687	0.05706	0.00311115	-0.001849	38.953	3.478e-09	2.0442e-06	1138870	760287	+++++-	++++++	10	0.2327	ALL.DBP.CURDRINK.COMBINED.regionleads	566.1	ALL.DBP.CURDRINK.COMBINED.locusleads;ALL.DBP.CURDRINK.COMBINED.regionleads
rs1229984	4:99318162:C_T	ADH1B	known	0	4	99318162	t	c	0.0299	-0.2836	0.1147	0.0134158	-0.4012	0.136	0.00317774	-0.01299	87.945	1.245e-16	3.18287e-13	818557	620277	??------+?-?-+?-?++++-+-??--?-+?-+--+??+-------+-+--??-?-++-+-?	??++-++-+?+?++?-?+------??-+?--?+-+--??-+++++-+-+-++??+?+--+--?	92	0.1688	EUR.PP.CURDRINK.COMBINED.regionleads	202.1	ALL.PP.CURDRINK.COMBINED.locusleads;ALL.PP.CURDRINK.COMBINED.regionleads;ALL.PP.CURDRINK.MALE.locusleads;ALL.PP.CURDRINK.MALE.regionleads;ALL.PP.HEAVYvsLIGHT.COMBINED.locusleads;ALL.PP.HEAVYvsLIGHT.COMBINED.regionleads;ALL.PP.LIGHTvsNEVER.COMBINED.locusleads;ALL.PP.LIGHTvsNEVER.COMBINED.regionleads;ALL.SBP.CURDRINK.COMBINED.locusleads;ALL.SBP.CURDRINK.COMBINED.regionleads;ALL.SBP.CURDRINK.MALE.lo…
rs7753826	6:26042011:A_T	HIST1H2BB	known	-1215	6	26042011	a	t	0.2601	0.1058	0.0314	0.000753247	0.1135	0.03863	0.00330197	-0.0009702	99.432	2.563e-22	1.28684e-18	1148190	766003	-+++-+	+-+++-	10	0.005879	ALL.DBP.CURDRINK.COMBINED.locusleads	39.2	ALL.DBP.CURDRINK.COMBINED.locusleads;ALL.DBP.CURDRINK.FEMALE.locusleads;ALL.DBP.CURDRINK.MALE.locusleads;ALL.DBP.HEAVYvsLIGHT.COMBINED.locusleads;ALL.DBP.HEAVYvsLIGHT.FEMALE.locusleads;ALL.DBP.HEAVYvsLIGHT.MALE.locusleads;ALL.DBP.LIGHTvsNEVER.COMBINED.locusleads;ALL.PP.CURDRINK.COMBINED.locusleads;ALL.PP.CURDRINK.FEMALE.locusleads;ALL.PP.CURDRINK.FEMALE.regionleads;ALL.PP.HEAVYvsLIGHT.COMBINED.lo…
rs111730145	14:74759384:C_T	YLPM1	known	-3981	14	74759384	t	c	0.8523	0.3818	0.05976	1.67095e-10	-0.3222	0.1097	0.00331296	-0.003566	41.221	1.119e-09	6.17246e-07	615148	187230	+++++	---++	8	0.8943	ALL.SBP.HEAVYvsLIGHT.COMBINED.locusleads	522.1	ALL.SBP.CURDRINK.COMBINED.locusleads;ALL.SBP.HEAVYvsLIGHT.COMBINED.locusleads;ALL.SBP.HEAVYvsLIGHT.COMBINED.regionleads;ALL.SBP.LIGHTvsNEVER.COMBINED.locusleads;ALL.SBP.LIGHTvsNEVER.COMBINED.regionleads
rs118139683	20:33588320:A_T	CBFA2T2	known	0	20	33588320	a	t	0.904	-0.2766	0.05392	2.90016e-07	0.1854	0.06321	0.00335617	-0.002905	33.928	4.292e-08	1.87065e-05	1024870	720645	------	--++++	10	0.3822	ALL.DBP.CURDRINK.COMBINED.locusleads	298.2	ALL.DBP.CURDRINK.COMBINED.locusleads
rs4142362	20:10923051:A_C	LOC101929413	known	13779	20	10923051	a	c	0.7541	0.04599	0.03006	0.126032	0.1087	0.03725	0.00352148	-0.0009033	51.725	5.862e-12	6.30462e-09	1142950	762270	++-++-	+-++-+	10	0.0003808	ALL.DBP.CURDRINK.COMBINED.locusleads	20.16	ALL.DBP.CURDRINK.COMBINED.locusleads
rs1380257	18:54272973:A_G	POLI	known	0	18	54272973	a	g	0.4211	0.1411	0.02198	1.36748e-10	-0.126	0.04318	0.00352264	-0.0004825	41.347	1.051e-09	6.17987e-07	746273	207600	++++-	+----	8	0.4067	ALL.DBP.HEAVYvsLIGHT.COMBINED.locusleads	518.1	ALL.DBP.HEAVYvsLIGHT.COMBINED.locusleads;ALL.DBP.HEAVYvsLIGHT.COMBINED.regionleads;EUR.DBP.CURDRINK.COMBINED.locusleads;EUR.DBP.CURDRINK.COMBINED.regionleads
rs2206815	20:10688540:A_C	JAG1	known	14494	20	10688540	a	c	0.506	-0.1706	0.03057	2.39643e-08	-0.1094	0.03751	0.0035392	-0.0009339	196.401	2.249e-43	3.24822e-39	1146910	765003	------	-+---+	10	0.495	ALL.PP.CURDRINK.COMBINED.locusleads	20.2	ALL.PP.CURDRINK.COMBINED.locusleads;ALL.PP.CURDRINK.COMBINED.regionleads;ALL.PP.CURDRINK.FEMALE.locusleads;ALL.PP.CURDRINK.FEMALE.regionleads;ALL.PP.CURDRINK.MALE.locusleads;ALL.PP.CURDRINK.MALE.regionleads;ALL.PP.HEAVYvsLIGHT.COMBINED.locusleads;ALL.PP.HEAVYvsLIGHT.COMBINED.regionleads;ALL.PP.HEAVYvsLIGHT.FEMALE.locusleads;ALL.PP.HEAVYvsLIGHT.FEMALE.regionleads;ALL.PP.HEAVYvsLIGHT.MALE.locuslead…
rs12258967	10:18439030:C_G	CACNB2	known	0	10	18439030	c	g	0.7332	0.4531	0.0401	1.32341e-29	0.2368	0.08167	0.0037379	-0.001606	221.461	8.136e-49	3.72093e-44	745958	207376	+++++	+-+-+	8	0.01327	ALL.SBP.HEAVYvsLIGHT.COMBINED.locusleads	34.1	ALL.DBP.CURDRINK.COMBINED.locusleads;ALL.DBP.CURDRINK.COMBINED.regionleads;ALL.DBP.CURDRINK.FEMALE.locusleads;ALL.DBP.CURDRINK.FEMALE.regionleads;ALL.DBP.CURDRINK.MALE.locusleads;ALL.DBP.CURDRINK.MALE.regionleads;ALL.DBP.HEAVYvsLIGHT.COMBINED.locusleads;ALL.DBP.HEAVYvsLIGHT.COMBINED.regionleads;ALL.DBP.HEAVYvsLIGHT.FEMALE.locusleads;ALL.DBP.HEAVYvsLIGHT.FEMALE.regionleads;ALL.DBP.HEAVYvsLIGHT.MAL…
rs4985460	16:69930471:A_G	WWP2	known	0	16	69930471	a	g	0.3465	0.1057	0.02583	4.27409e-05	0.1478	0.05105	0.00378916	-0.0006669	49.86	1.489e-11	1.44398e-08	748678	208077	+++++	++++-	8	0.9826	ALL.PP.HEAVYvsLIGHT.COMBINED.locusleads	22.6	ALL.PP.CURDRINK.COMBINED.locusleads;ALL.PP.HEAVYvsLIGHT.COMBINED.locusleads;ALL.PP.HEAVYvsLIGHT.FEMALE.locusleads;ALL.SBP.CURDRINK.COMBINED.locusleads;ALL.SBP.HEAVYvsLIGHT.COMBINED.locusleads;ALL.SBP.HEAVYvsLIGHT.FEMALE.locusleads;ALL.SBP.HEAVYvsLIGHT.FEMALE.regionleads;EUR.PP.HEAVYvsLIGHT.COMBINED.locusleads;EUR.PP.HEAVYvsLIGHT.FEMALE.locusleads;EUR.SBP.HEAVYvsLIGHT.COMBINED.locusleads
rs11590118	1:227999495:G_T	WNT3A	known	-7526	1	227999495	t	g	0.098	-0.491	0.09078	6.34908e-08	0.296	0.1027	0.00394933	-0.008236	45.626	1.84e-09	4.83933e-06	351439	273078	+-+--+??-+-?-?+-?+------+++--+-??---+----+----+--+??+?--+---+	-+--+-??---?-?-+?-++--+----+---??+-+-++++-++-+-++-??+?++-+-++	100	0.5756	EUR.DBP.CURDRINK.FEMALE.regionleads	227.2	EUR.DBP.CURDRINK.FEMALE.locusleads;EUR.DBP.CURDRINK.FEMALE.regionleads;EUR.SBP.CURDRINK.COMBINED.locusleads;EUR.SBP.CURDRINK.FEMALE.locusleads;EUR.SBP.CURDRINK.FEMALE.regionleads
rs11100084	4:156815791:C_T	PDGFC	known	0	4	156815791	t	c	0.7463	0.1303	0.04001	0.00112721	0.2315	0.0804	0.00398492	-0.001599	37.472	7.294e-09	3.40047e-06	750333	208433	-++++	+++++	8	0.8644	ALL.SBP.HEAVYvsLIGHT.COMBINED.regionleads	604.1	ALL.DBP.CURDRINK.COMBINED.locusleads;ALL.DBP.CURDRINK.COMBINED.regionleads;ALL.SBP.HEAVYvsLIGHT.COMBINED.locusleads;ALL.SBP.HEAVYvsLIGHT.COMBINED.regionleads
rs4841229	8:9820519:A_C	TNKS	known	38173	8	9820519	a	c	0.6101	-0.1814	0.03649	6.65312e-07	-0.2047	0.07136	0.00412353	-0.001273	61.593	4.22e-14	5.97735e-11	751328	208602	-+--+	---+-	8	0.000153	ALL.SBP.HEAVYvsLIGHT.COMBINED.locusleads	97.6	ALL.DBP.CURDRINK.COMBINED.locusleads;ALL.SBP.CURDRINK.COMBINED.locusleads;ALL.SBP.HEAVYvsLIGHT.COMBINED.locusleads;EUR.SBP.HEAVYvsNEVER.COMBINED.locusleads
rs12876275	13:31613721:G_T	RXFP2	known	-125820	13	31613721	t	g	0.4047	0.4757	0.0695	7.66875e-12	-0.233	0.08161	0.00430311	-0.004824	78.652	8.334e-18	8.7157e-14	644257	450703	++++++	-+----	10	0.5112	ALL.SBP.CURDRINK.MALE.regionleads	177.1	ALL.DBP.CURDRINK.COMBINED.locusleads;ALL.DBP.CURDRINK.COMBINED.regionleads;ALL.DBP.CURDRINK.MALE.locusleads;ALL.DBP.CURDRINK.MALE.regionleads;ALL.DBP.HEAVYvsLIGHT.COMBINED.locusleads;ALL.DBP.HEAVYvsLIGHT.COMBINED.regionleads;ALL.DBP.HEAVYvsLIGHT.MALE.locusleads;ALL.DBP.HEAVYvsLIGHT.MALE.regionleads;ALL.DBP.LIGHTvsNEVER.COMBINED.locusleads;ALL.DBP.LIGHTvsNEVER.COMBINED.regionleads;ALL.PP.CURDRINK.…
rs61529021	12:132525817:C_T	FBRSL1	known	0	12	132525817	t	c	0.0288	0.7079	0.1153	8.27109e-10	-0.4568	0.1608	0.00450011	-0.01328	42.712	5.311e-10	3.56495e-07	1049920	710595	+?++++	-?---+	8	0.3829	ALL.SBP.CURDRINK.COMBINED.regionleads	493.1	ALL.SBP.CURDRINK.COMBINED.locusleads;ALL.SBP.CURDRINK.COMBINED.regionleads;ALL.SBP.CURDRINK.FEMALE.locusleads;ALL.SBP.CURDRINK.FEMALE.regionleads;ALL.SBP.LIGHTvsNEVER.COMBINED.locusleads;ALL.SBP.LIGHTvsNEVER.COMBINED.regionleads;EAS.SBP.CURDRINK.COMBINED.locusleads;EAS.SBP.CURDRINK.COMBINED.regionleads
rs11913132	22:40382774:A_G	SGSM3	known	0	22	40382774	a	g	0.7711	-0.0634	0.03507	0.0706356	-0.1244	0.04382	0.00452713	-0.001226	53.699	2.185e-12	2.54876e-09	1145290	764941	++---+	-+--+-	10	0.729	ALL.PP.CURDRINK.COMBINED.locusleads	226.2	ALL.PP.CURDRINK.COMBINED.locusleads;ALL.PP.CURDRINK.MALE.locusleads;ALL.PP.HEAVYvsLIGHT.MALE.locusleads
rs113104814	11:73358588:G_T	ARHGEF17	known	0	11	73358588	t	g	0.0945	-0.1304	0.0365	0.000353451	-0.2084	0.07378	0.00473376	-0.001332	40.664	1.479e-09	8.361e-07	710340	198608	---+-	++---	8	0.4349	ALL.DBP.HEAVYvsLIGHT.COMBINED.locusleads	521.2	ALL.DBP.HEAVYvsLIGHT.COMBINED.locusleads;ALL.DBP.HEAVYvsLIGHT.COMBINED.regionleads;ALL.SBP.CURDRINK.COMBINED.locusleads;ALL.SBP.CURDRINK.COMBINED.regionleads;EUR.DBP.HEAVYvsLIGHT.COMBINED.locusleads;EUR.DBP.HEAVYvsLIGHT.COMBINED.regionleads
rs12431811	14:93989441:C_T	LINC00521	known	-7828	14	93989441	t	c	0.4666	-0.09192	0.02636	0.000488286	-0.1474	0.05237	0.00488397	-0.0006936	40.051	2.009e-09	1.17345e-06	696098	188760	-+-++	+----	8	0.5171	ALL.PP.HEAVYvsLIGHT.COMBINED.locusleads	380.2	ALL.PP.HEAVYvsLIGHT.COMBINED.locusleads;ALL.PP.HEAVYvsLIGHT.COMBINED.regionleads;ALL.PP.HEAVYvsNEVER.COMBINED.locusleads;ALL.PP.HEAVYvsNEVER.COMBINED.regionleads;EUR.PP.HEAVYvsLIGHT.COMBINED.locusleads;EUR.PP.HEAVYvsLIGHT.COMBINED.regionleads;EUR.PP.HEAVYvsNEVER.COMBINED.locusleads;EUR.PP.HEAVYvsNEVER.COMBINED.regionleads
rs11191699	10:103469639:C_T	CALHM3	known	-3164	10	103469639	t	c	0.3551	-0.2968	0.04736	3.68326e-10	0.1613	0.05746	0.00499788	-0.002241	56.432	5.571e-13	6.60302e-10	1147540	766070	------	-+++++	10	0.5341	ALL.SBP.CURDRINK.COMBINED.locusleads	8.5	ALL.PP.CURDRINK.COMBINED.locusleads;ALL.PP.HEAVYvsLIGHT.COMBINED.locusleads;ALL.SBP.CURDRINK.COMBINED.locusleads;ALL.SBP.CURDRINK.FEMALE.locusleads;ALL.SBP.LIGHTvsNEVER.COMBINED.locusleads
rs11655598	17:46790728:C_G	WNT3	known	0	17	46790728	c	g	0.743	-0.03822	0.03546	0.281108	-0.1218	0.04343	0.00503927	-0.001256	41.743	8.621e-10	6.30983e-07	1142640	764226	-?--++	+?----	8	0.04137	ALL.PP.CURDRINK.COMBINED.locusleads	41.3	ALL.PP.CURDRINK.COMBINED.locusleads;ALL.PP.CURDRINK.MALE.locusleads;ALL.PP.HEAVYvsLIGHT.COMBINED.locusleads;ALL.SBP.HEAVYvsLIGHT.COMBINED.locusleads
rs6606672	11:69333804:A_G	MYEOV	known	36517	11	69333804	a	g	0.6254	-0.1665	0.0313	1.04059e-07	0.108	0.0386	0.00514317	-0.0009793	34.923	2.61e-08	1.34912e-05	1141240	763980	------	++++--	10	0.772	ALL.PP.CURDRINK.COMBINED.regionleads	288.4	ALL.PP.CURDRINK.COMBINED.locusleads;ALL.PP.CURDRINK.COMBINED.regionleads
rs80144893	3:41977870:C_T	ULK4	known	15702	3	41977870	t	c	0.0376	0.1268	0.0614	0.0389091	0.2377	0.08575	0.0055711	-0.003768	41.281	1.086e-09	7.29927e-07	1061580	701305	+-++--	++++++	10	0.6363	ALL.DBP.CURDRINK.COMBINED.locusleads	14.5	ALL.DBP.CURDRINK.COMBINED.locusleads;ALL.DBP.HEAVYvsLIGHT.COMBINED.locusleads;ALL.PP.CURDRINK.COMBINED.locusleads;ALL.PP.CURDRINK.MALE.locusleads
rs284142	1:91791069:C_T	TGFBR3	known	0	1	91791069	t	c	0.6745	0.02689	0.03374	0.425464	0.1131	0.04083	0.00560525	-0.001138	37.653	6.665e-09	3.99576e-06	1147190	765134	-+++++	++-+-+	10	0.1128	ALL.PP.CURDRINK.COMBINED.locusleads	597.1	ALL.PP.CURDRINK.COMBINED.locusleads;ALL.PP.CURDRINK.COMBINED.regionleads;ALL.PP.HEAVYvsLIGHT.COMBINED.locusleads;ALL.PP.HEAVYvsLIGHT.COMBINED.regionleads
rs149014145	7:27297845:A_T	EVX1	known	51272	7	27297845	a	t	0.9786	-0.9696	0.1902	3.43638e-07	0.6158	0.2225	0.00564637	-0.03611	35.236	2.231e-08	2.4976e-05	468503	330969	-??--+	+??+--	6	0.004215	ALL.PP.CURDRINK.MALE.locusleads	24.11	ALL.PP.CURDRINK.MALE.locusleads
rs74763072	8:17562860:A_G	SLC7A2	known	0	8	17562860	a	g	0.0311	0.1113	0.07548	0.14033	0.2617	0.09511	0.00593138	-0.005696	43.701	3.24e-10	2.46021e-07	1101650	744825	-++++-	++++++	10	0.1716	ALL.DBP.CURDRINK.COMBINED.locusleads	479.1	ALL.DBP.CURDRINK.COMBINED.locusleads;ALL.DBP.CURDRINK.COMBINED.regionleads;ALL.DBP.HEAVYvsLIGHT.COMBINED.locusleads;ALL.DBP.HEAVYvsLIGHT.COMBINED.regionleads;ALL.DBP.LIGHTvsNEVER.COMBINED.locusleads;ALL.DBP.LIGHTvsNEVER.COMBINED.regionleads
rs12350739	9:16885019:A_G	BNC2	known	14231	9	16885019	a	g	0.4884	-0.2091	0.04	1.71817e-07	0.127	0.04644	0.0062435	-0.001595	39.061	3.296e-09	2.13678e-06	1064380	739679	------	+-++++	10	0.7942	ALL.PP.CURDRINK.COMBINED.locusleads	558.1	ALL.PP.CURDRINK.COMBINED.locusleads;ALL.PP.CURDRINK.COMBINED.regionleads;EUR.PP.CURDRINK.COMBINED.locusleads;EUR.PP.CURDRINK.COMBINED.regionleads
rs11302936	14:70945578:C_CT	PCNX	known	0	14	70945578	ct	c	0.3975	-0.07482	0.04823	0.120826	-0.1677	0.06141	0.00631759	-0.002322	42.881	4.88e-10	3.29808e-07	1001300	651666	-?-+-+	-?+---	8	0.2075	ALL.SBP.CURDRINK.COMBINED.locusleads	491.1	ALL.PP.CURDRINK.COMBINED.locusleads;ALL.PP.CURDRINK.COMBINED.regionleads;ALL.PP.CURDRINK.MALE.locusleads;ALL.PP.CURDRINK.MALE.regionleads;ALL.PP.HEAVYvsLIGHT.COMBINED.locusleads;ALL.PP.HEAVYvsLIGHT.COMBINED.regionleads;ALL.SBP.CURDRINK.COMBINED.locusleads;ALL.SBP.CURDRINK.COMBINED.regionleads;ALL.SBP.HEAVYvsLIGHT.COMBINED.locusleads;ALL.SBP.HEAVYvsLIGHT.COMBINED.regionleads;ALL.SBP.LIGHTvsNEVER.C…
rs10069956	5:148491576:A_C	HTR4	known	0	5	148491576	a	c	0.438	0.1566	0.02647	3.29602e-09	-0.08835	0.03249	0.00654206	-0.0007004	48.068	3.65e-11	3.33835e-08	1147150	765117	+++++-	+----+	10	0.02225	ALL.DBP.CURDRINK.COMBINED.locusleads	113.4	ALL.DBP.CURDRINK.COMBINED.locusleads;ALL.DBP.CURDRINK.MALE.locusleads;ALL.SBP.CURDRINK.COMBINED.locusleads;EUR.DBP.CURDRINK.MALE.locusleads
rs2903378	20:41580791:A_G	CHD6	known	0	20	41580791	a	g	0.7466	0.4586	0.06699	7.60508e-12	-0.2413	0.08903	0.00672178	-0.00448	60.456	7.45e-14	3.06788e-10	493897	313843	+-++++	-+----	10	0.8063	ALL.SBP.CURDRINK.FEMALE.locusleads	175.2	ALL.DBP.LIGHTvsNEVER.COMBINED.locusleads;ALL.DBP.LIGHTvsNEVER.COMBINED.regionleads;ALL.DBP.LIGHTvsNEVER.FEMALE.locusleads;ALL.DBP.LIGHTvsNEVER.FEMALE.regionleads;ALL.SBP.CURDRINK.COMBINED.locusleads;ALL.SBP.CURDRINK.FEMALE.locusleads;ALL.SBP.CURDRINK.FEMALE.regionleads;ALL.SBP.HEAVYvsNEVER.FEMALE.locusleads;ALL.SBP.HEAVYvsNEVER.FEMALE.regionleads;ALL.SBP.LIGHTvsNEVER.COMBINED.locusleads;ALL.SBP.L…
rs229888	7:74304968:A_G	CLIP2	known	0	7	74304968	a	g	0.6701	0.1894	0.03352	1.60114e-08	-0.1138	0.04204	0.00679053	-0.001121	40.661	1.481e-09	1.03379e-06	1089890	719298	+-++++	-+----	10	0.5598	ALL.PP.CURDRINK.COMBINED.locusleads	469.2	ALL.PP.CURDRINK.COMBINED.locusleads;ALL.PP.CURDRINK.COMBINED.regionleads
rs57636537	9:125066464:A_T	SCAI	known	0	9	125066464	a	t	0.8125	-0.05526	0.03804	0.146312	-0.1352	0.04999	0.00683988	-0.001445	36.453	1.214e-08	6.82243e-06	1004990	654747	+?+---	+?+-++	8	4.457e-10	ALL.PP.CURDRINK.COMBINED.locusleads	90.5	ALL.PP.CURDRINK.COMBINED.locusleads
rs2969138	7:72449986:C_T	CALN1	novel-T3	37611	7	72449986	t	c	0.3982	-0.4355	0.1012	1.68227e-05	0.2847	0.1074	0.00802923	-0.01023	36.064	4.996e-08	0.000194509	234853	207943	-------++-?++--+-----??-+	++++--+--+?--++-++-++??+-	42	0.8094	EUR.DBP.LIGHTvsNEVER.MALE.locusleads	736.1	EUR.DBP.LIGHTvsNEVER.MALE.locusleads;EUR.DBP.LIGHTvsNEVER.MALE.regionleads
rs34976449	1:8438266:T_TG	RERE	known	0	1	8438266	t	tg	0.3603	-0.05879	0.05086	0.247715	-0.1653	0.06236	0.00803162	-0.002579	39.369	2.825e-09	1.62046e-06	1050910	692826	+?--++	-?+---	8	0.4405	ALL.SBP.CURDRINK.COMBINED.locusleads	340.2	ALL.SBP.CURDRINK.COMBINED.locusleads;ALL.SBP.HEAVYvsLIGHT.COMBINED.locusleads
rs9714033	3:121905895:G_T	SLC15A2	known	0	3	121905895	t	g	0.4859	-0.2146	0.04144	2.23591e-07	0.1283	0.04842	0.00805558	-0.001715	38.578	4.197e-09	5.30431e-06	616276	447453	-----	+++-+	8	0.8297	ALL.DBP.LIGHTvsNEVER.COMBINED.locusleads	573.1	ALL.DBP.LIGHTvsNEVER.COMBINED.locusleads
rs35026066	13:113805239:C_T	TMEM255B	known	0	13	113805239	t	c	0.1822	-0.09892	0.03058	0.00121731	-0.1593	0.06037	0.00832178	-0.0009336	35.028	2.476e-08	9.83094e-06	654767	178513	-----	+--++	8	0.5123	ALL.DBP.HEAVYvsLIGHT.COMBINED.locusleads	136.4	ALL.DBP.HEAVYvsLIGHT.COMBINED.locusleads
rs1325990	10:18418423:A_G	CACNB2	known	0	10	18418423	a	g	0.4442	-0.2341	0.0353	3.31779e-11	-0.1876	0.07124	0.00845467	-0.001244	90.287	2.48e-20	9.92873e-17	750590	208489	---+-	++---	8	0.2235	ALL.SBP.HEAVYvsLIGHT.COMBINED.locusleads	34.4	ALL.DBP.CURDRINK.COMBINED.locusleads;ALL.DBP.CURDRINK.FEMALE.locusleads;ALL.DBP.HEAVYvsLIGHT.COMBINED.locusleads;ALL.DBP.HEAVYvsLIGHT.FEMALE.locusleads;ALL.DBP.HEAVYvsNEVER.COMBINED.locusleads;ALL.DBP.HEAVYvsNEVER.FEMALE.locusleads;ALL.PP.CURDRINK.COMBINED.locusleads;ALL.PP.HEAVYvsLIGHT.COMBINED.locusleads;ALL.PP.LIGHTvsNEVER.COMBINED.locusleads;ALL.SBP.CURDRINK.COMBINED.locusleads;ALL.SBP.CURDRI…
rs723757	3:160927647:C_T	PPM1L	known	0	3	160927647	t	c	0.4145	0.1907	0.0385	7.29853e-07	-0.1177	0.04488	0.00872747	-0.001479	34.319	3.529e-08	1.76091e-05	1136030	762545	+++++-	-++--+	10	0.4272	ALL.PP.CURDRINK.COMBINED.locusleads	545.2	ALL.PP.CURDRINK.COMBINED.locusleads
rs2137301	8:23536524:G_T	SLC25A37	known	0	8	23536524	t	g	0.8349	-0.04205	0.03514	0.231446	-0.1143	0.04363	0.00879924	-0.001232	37.692	6.537e-09	3.565e-06	1143070	763571	++---+	------	10	0.5181	ALL.DBP.CURDRINK.COMBINED.locusleads	182.2	ALL.DBP.CURDRINK.COMBINED.locusleads;ALL.DBP.HEAVYvsLIGHT.COMBINED.locusleads
rs76020419	8:6502768:G_T	ANGPT2,MCPH1	known	0	8	6502768	t	g	0.0375	-0.8073	0.158	3.23023e-07	0.4616	0.1762	0.00879942	-0.02497	45.762	1.734e-09	4.59532e-06	331703	261134	++-+?+??-???-????-?-----??-?-?????--??----?-+?+?-?????+-?--+-	--+-?-??+???-????+?+++-+??+?+?????--??++++?+-?-?-?????++?++++	60	0.007135	EUR.DBP.CURDRINK.FEMALE.locusleads	475.2	ALL.DBP.CURDRINK.COMBINED.locusleads;ALL.DBP.CURDRINK.FEMALE.locusleads;ALL.DBP.CURDRINK.FEMALE.regionleads;ALL.SBP.CURDRINK.FEMALE.locusleads;ALL.SBP.CURDRINK.FEMALE.regionleads;ALL.SBP.HEAVYvsLIGHT.COMBINED.locusleads;ALL.SBP.HEAVYvsLIGHT.COMBINED.regionleads;EUR.DBP.CURDRINK.COMBINED.locusleads;EUR.DBP.CURDRINK.FEMALE.locusleads;EUR.DBP.CURDRINK.FEMALE.regionleads;EUR.SBP.CURDRINK.FEMALE.locus…
rs11629850	15:40024874:A_G	EIF2AK4	known	0	15	40024874	a	g	0.4867	0.03276	0.02668	0.21949	0.08516	0.03255	0.00888929	-0.0007111	41.305	1.073e-09	7.22057e-07	1145910	764770	+++++-	+-++-+	10	0.5707	ALL.DBP.CURDRINK.COMBINED.locusleads	519.1	ALL.DBP.CURDRINK.COMBINED.locusleads;ALL.DBP.CURDRINK.COMBINED.regionleads;ALL.DBP.HEAVYvsLIGHT.COMBINED.locusleads;ALL.DBP.HEAVYvsLIGHT.COMBINED.regionleads;ALL.SBP.CURDRINK.COMBINED.locusleads;ALL.SBP.CURDRINK.COMBINED.regionleads;ALL.SBP.HEAVYvsLIGHT.COMBINED.locusleads;ALL.SBP.HEAVYvsLIGHT.COMBINED.regionleads;EUR.DBP.CURDRINK.COMBINED.locusleads;EUR.DBP.CURDRINK.COMBINED.regionleads;EUR.DBP.…
rs61736572	19:2249584:A_G	AMH	known	0	19	2249584	a	g	0.0486	0.2618	0.06812	0.000121432	0.2278	0.0871	0.0089127	-0.004634	95.686	1.668e-21	6.21671e-18	1081300	737321	-?++++	+?+++-	8	0.07549	ALL.PP.CURDRINK.COMBINED.locusleads	16.2	ALL.PP.CURDRINK.COMBINED.locusleads;ALL.PP.CURDRINK.FEMALE.locusleads;ALL.PP.CURDRINK.MALE.locusleads;ALL.PP.HEAVYvsLIGHT.COMBINED.locusleads;ALL.PP.HEAVYvsLIGHT.FEMALE.locusleads;ALL.PP.HEAVYvsLIGHT.MALE.locusleads;ALL.PP.HEAVYvsNEVER.COMBINED.locusleads;ALL.PP.LIGHTvsNEVER.COMBINED.locusleads;ALL.SBP.CURDRINK.COMBINED.locusleads;ALL.SBP.HEAVYvsLIGHT.COMBINED.locusleads;ALL.SBP.HEAVYvsLIGHT.MALE…
rs2935545	8:100663644:A_G	SNX31	known	13979	8	100663644	a	g	0.3013	-0.1657	0.03804	1.32496e-05	-0.2006	0.07679	0.00899302	-0.001445	49.041	2.243e-11	1.82497e-08	750602	208490	-----	+---+	8	0.5178	ALL.SBP.HEAVYvsLIGHT.COMBINED.locusleads	396.1	ALL.DBP.CURDRINK.COMBINED.locusleads;ALL.DBP.CURDRINK.COMBINED.regionleads;ALL.DBP.CURDRINK.FEMALE.locusleads;ALL.DBP.CURDRINK.FEMALE.regionleads;ALL.DBP.HEAVYvsLIGHT.COMBINED.locusleads;ALL.DBP.HEAVYvsLIGHT.COMBINED.regionleads;ALL.DBP.HEAVYvsNEVER.COMBINED.locusleads;ALL.DBP.HEAVYvsNEVER.COMBINED.regionleads;ALL.SBP.CURDRINK.COMBINED.locusleads;ALL.SBP.CURDRINK.COMBINED.regionleads;ALL.SBP.HEAV…
rs4473928	7:7199926:A_G	C1GALT1	known	0	7	7199926	a	g	0.8714	-0.1941	0.03703	1.59107e-07	-0.1846	0.07079	0.00911494	-0.001369	66.764	3.233e-13	6.7416e-10	573203	168349	----+--??--??-?----?--?-++-???----??++----+??-??????-+--+-	+-++-++??-+??+?+++-?++?++-+???++-+??++++-+-??-??????------	74	0.5751	EUR.DBP.HEAVYvsLIGHT.COMBINED.locusleads	305.1	ALL.DBP.CURDRINK.COMBINED.locusleads;ALL.DBP.CURDRINK.COMBINED.regionleads;ALL.DBP.CURDRINK.MALE.locusleads;ALL.DBP.CURDRINK.MALE.regionleads;ALL.DBP.HEAVYvsLIGHT.COMBINED.locusleads;ALL.DBP.HEAVYvsLIGHT.COMBINED.regionleads;ALL.DBP.HEAVYvsLIGHT.MALE.locusleads;ALL.DBP.HEAVYvsLIGHT.MALE.regionleads;ALL.DBP.HEAVYvsNEVER.COMBINED.locusleads;ALL.DBP.HEAVYvsNEVER.COMBINED.regionleads;ALL.SBP.CURDRINK…
rs117965476	1:10742711:C_T	CASZ1	known	0	1	10742711	t	c	0.9335	0.3719	0.1295	0.00408122	0.5303	0.2039	0.00930108	-0.01675	40.998	1.251e-09	7.74735e-07	316472	153573	+?+++?	+?+--?	6	0.5195	ALL.SBP.CURDRINK.COMBINED.locusleads	19.5	ALL.DBP.CURDRINK.COMBINED.locusleads;ALL.SBP.CURDRINK.COMBINED.locusleads;ALL.SBP.HEAVYvsLIGHT.COMBINED.locusleads;EAS.DBP.CURDRINK.COMBINED.locusleads;EAS.SBP.CURDRINK.COMBINED.locusleads;EAS.SBP.HEAVYvsLIGHT.COMBINED.locusleads
rs7076938	10:114029616:C_T	ADRB1	known	-14430	10	114029616	t	c	0.7343	0.129	0.02979	1.48898e-05	0.09471	0.03643	0.00932834	-0.0008861	131.811	2.386e-29	2.00327e-25	1150430	767935	-+++-+	+-+++-	10	0.0006694	ALL.DBP.CURDRINK.COMBINED.locusleads	56.3	ALL.DBP.CURDRINK.COMBINED.locusleads;ALL.DBP.CURDRINK.FEMALE.locusleads;ALL.DBP.CURDRINK.MALE.locusleads;ALL.DBP.HEAVYvsLIGHT.COMBINED.locusleads;ALL.DBP.HEAVYvsLIGHT.FEMALE.locusleads;ALL.DBP.HEAVYvsLIGHT.FEMALE.regionleads;ALL.DBP.HEAVYvsLIGHT.MALE.locusleads;ALL.DBP.HEAVYvsNEVER.COMBINED.locusleads;ALL.DBP.LIGHTvsNEVER.COMBINED.locusleads;ALL.DBP.LIGHTvsNEVER.FEMALE.locusleads;ALL.PP.HEAVYvsLI…
rs7731407	5:111765330:A_C	NREP	known	0	5	111765330	a	c	0.3511	-0.1422	0.0383	0.000204984	-0.2011	0.07739	0.00936247	-0.001466	39.832	4.706e-08	2.55636e-05	631976	176021	-+--+-+---++--?+--+-------+++-+++-+++++------++??+++-+----	+--+-----+-+--?+-+---++-+--+-+-+-+-----+--+-+-+??--+-+++++	108	0.3788	EUR.SBP.HEAVYvsLIGHT.COMBINED.regionleads	731.1	EUR.SBP.HEAVYvsLIGHT.COMBINED.locusleads;EUR.SBP.HEAVYvsLIGHT.COMBINED.regionleads
rs57866767	10:94263320:C_T	PLCE1	known	0	10	94263320	t	c	0.5485	0.2547	0.0437	5.59696e-09	0.1394	0.05368	0.00940774	-0.001907	192.594	1.509e-42	3.66489e-38	1148450	766206	--++++	++++++	10	0.03972	ALL.SBP.CURDRINK.COMBINED.locusleads	46.1	ALL.DBP.CURDRINK.COMBINED.locusleads;ALL.DBP.CURDRINK.COMBINED.regionleads;ALL.DBP.CURDRINK.FEMALE.locusleads;ALL.DBP.CURDRINK.FEMALE.regionleads;ALL.DBP.CURDRINK.MALE.locusleads;ALL.DBP.CURDRINK.MALE.regionleads;ALL.DBP.HEAVYvsLIGHT.COMBINED.locusleads;ALL.DBP.HEAVYvsLIGHT.COMBINED.regionleads;ALL.DBP.HEAVYvsLIGHT.FEMALE.locusleads;ALL.DBP.HEAVYvsLIGHT.FEMALE.regionleads;ALL.DBP.HEAVYvsLIGHT.MAL…
rs56182212	22:40495044:A_T	MKL1	known	0	22	40495044	a	t	0.1227	0.08742	0.04366	0.0452535	0.1454	0.05613	0.00958603	-0.001905	47.462	4.94e-11	4.57916e-08	1084600	718427	+-+++-	+-++-+	10	0.3932	ALL.PP.CURDRINK.COMBINED.locusleads	226.3	ALL.PP.CURDRINK.COMBINED.locusleads
rs9818761	3:124905339:C_T	MUC13	known	-102	3	124905339	t	c	0.568	-0.06597	0.04748	0.164703	-0.1508	0.05829	0.00967974	-0.002253	42.918	4.791e-10	3.24348e-07	1018850	677316	-+--+-	+----+	10	0.3795	ALL.SBP.CURDRINK.COMBINED.locusleads	240.2	ALL.SBP.CURDRINK.COMBINED.locusleads;ALL.SBP.HEAVYvsLIGHT.COMBINED.locusleads
rs57748895	1:115283548:A_T	NGF	known	-2367	1	115283548	a	t	0.9738	-0.2444	0.09186	0.00780084	-0.2938	0.1138	0.00983086	-0.008428	70.8	4.226e-16	1.00596e-12	915438	660777	-??--?	+??-+?	4	1.617e-05	ALL.DBP.CURDRINK.COMBINED.locusleads	121.2	ALL.DBP.CURDRINK.COMBINED.locusleads;ALL.DBP.CURDRINK.FEMALE.locusleads;ALL.DBP.HEAVYvsLIGHT.FEMALE.locusleads;ALL.DBP.HEAVYvsLIGHT.MALE.locusleads;ALL.DBP.LIGHTvsNEVER.COMBINED.locusleads;ALL.SBP.CURDRINK.COMBINED.locusleads;EUR.DBP.CURDRINK.MALE.locusleads;EUR.DBP.CURDRINK.MALE.regionleads;EUR.DBP.HEAVYvsLIGHT.MALE.locusleads;EUR.DBP.HEAVYvsLIGHT.MALE.regionleads
rs921769	5:57893290:A_G	LOC101928539	known	0	5	57893290	a	g	0.2647	-0.1507	0.03458	1.3125e-05	-0.1697	0.06589	0.0100094	-0.001194	51.587	6.287e-11	2.39232e-07	353024	102391	+++-------?-?----+++-+++?+-++----+---+---??----+-	-----++-++?-?--+----+--+?-+--+---------++??+-+--+	86	0.6955	EUR.DBP.HEAVYvsLIGHT.MALE.locusleads	424.1	ALL.DBP.CURDRINK.COMBINED.locusleads;ALL.DBP.CURDRINK.MALE.locusleads;ALL.DBP.CURDRINK.MALE.regionleads;ALL.DBP.HEAVYvsLIGHT.COMBINED.locusleads;ALL.DBP.HEAVYvsLIGHT.MALE.locusleads;ALL.DBP.HEAVYvsLIGHT.MALE.regionleads;EUR.DBP.CURDRINK.MALE.locusleads;EUR.DBP.CURDRINK.MALE.regionleads;EUR.DBP.HEAVYvsLIGHT.COMBINED.locusleads;EUR.DBP.HEAVYvsLIGHT.COMBINED.regionleads;EUR.DBP.HEAVYvsLIGHT.MALE.loc…
rs11086807	20:41563560:G_T	CHD6	known	0	20	41563560	t	g	0.1293	0.5866	0.09908	3.21026e-09	-0.4369	0.1698	0.0100813	-0.009787	36.198	1.38e-08	4.13635e-05	273412	170331	++++-	----+	8	0.1716	ALL.SBP.LIGHTvsNEVER.FEMALE.locusleads	175.3	ALL.SBP.LIGHTvsNEVER.FEMALE.locusleads
rs194533	7:90241463:A_G	C7orf63	known	-3710	7	90241463	a	g	0.4974	0.09116	0.02158	2.39704e-05	0.108	0.04259	0.0112189	-0.0004652	47.215	5.591e-11	4.45951e-08	750578	208477	+++++	+++-+	8	0.9824	ALL.DBP.HEAVYvsLIGHT.COMBINED.regionleads	417.1	ALL.DBP.CURDRINK.COMBINED.locusleads;ALL.DBP.CURDRINK.COMBINED.regionleads;ALL.DBP.HEAVYvsLIGHT.COMBINED.locusleads;ALL.DBP.HEAVYvsLIGHT.COMBINED.regionleads;ALL.DBP.HEAVYvsLIGHT.MALE.locusleads;EUR.DBP.CURDRINK.COMBINED.locusleads;EUR.DBP.CURDRINK.COMBINED.regionleads;EUR.DBP.CURDRINK.MALE.locusleads;EUR.DBP.HEAVYvsLIGHT.COMBINED.locusleads;EUR.DBP.HEAVYvsLIGHT.COMBINED.regionleads;EUR.DBP.HEAVY…
rs7763350	6:43381570:A_C	ZNF318	known	12127	6	43381570	a	c	0.6502	-0.4706	0.04636	3.28011e-24	0.1443	0.05693	0.0112546	-0.002146	199.666	4.396e-44	1.19606e-39	1148430	766188	------	+++++-	10	0.2003	ALL.SBP.CURDRINK.COMBINED.locusleads	43.1	ALL.DBP.CURDRINK.COMBINED.locusleads;ALL.DBP.CURDRINK.COMBINED.regionleads;ALL.DBP.CURDRINK.FEMALE.locusleads;ALL.DBP.CURDRINK.FEMALE.regionleads;ALL.DBP.CURDRINK.MALE.locusleads;ALL.DBP.CURDRINK.MALE.regionleads;ALL.DBP.HEAVYvsLIGHT.COMBINED.locusleads;ALL.DBP.HEAVYvsLIGHT.COMBINED.regionleads;ALL.DBP.HEAVYvsNEVER.COMBINED.locusleads;ALL.DBP.HEAVYvsNEVER.COMBINED.regionleads;ALL.DBP.LIGHTvsNEVER…
rs143167197	1:28407861:A_G	PHACTR4	known	0	1	28407861	a	g	0.9286	-0.178	0.08929	0.0462063	-0.2732	0.1079	0.0113422	-0.007978	59.686	1.095e-13	1.4685e-10	1109740	746963	-?----	-?----	8	0.9643	ALL.SBP.CURDRINK.COMBINED.locusleads	281.1	ALL.PP.CURDRINK.COMBINED.locusleads;ALL.PP.CURDRINK.COMBINED.regionleads;ALL.PP.HEAVYvsLIGHT.COMBINED.locusleads;ALL.PP.HEAVYvsLIGHT.COMBINED.regionleads;ALL.SBP.CURDRINK.COMBINED.locusleads;ALL.SBP.CURDRINK.COMBINED.regionleads;ALL.SBP.CURDRINK.MALE.locusleads;ALL.SBP.CURDRINK.MALE.regionleads;ALL.SBP.HEAVYvsLIGHT.COMBINED.locusleads;ALL.SBP.HEAVYvsLIGHT.COMBINED.regionleads;ALL.SBP.HEAVYvsLIGHT…
rs11785067	8:10564457:C_T	PRSS55	known	10291	8	10564457	t	c	0.777	0.1039	0.05864	0.0764231	0.1772	0.07	0.0113599	-0.003394	53.609	2.286e-12	2.42663e-09	1089240	723447	--++-+	+--++-	10	0.09275	ALL.SBP.CURDRINK.COMBINED.locusleads	97.12	ALL.DBP.HEAVYvsLIGHT.COMBINED.locusleads;ALL.SBP.CURDRINK.COMBINED.locusleads
rs55636822	17:81083414:A_G	BAIAP2	known	0	17	81083414	a	g	0.2368	0.2773	0.05288	1.57176e-07	-0.1627	0.06428	0.0113701	-0.002792	37.18	8.442e-09	4.35095e-06	1135790	757459	--++++	++----	10	0.2521	ALL.SBP.CURDRINK.COMBINED.regionleads	55.4	ALL.SBP.CURDRINK.COMBINED.locusleads;ALL.SBP.CURDRINK.COMBINED.regionleads
rs1757462	15:41492243:A_G	ITPKA	known	-1614	15	41492243	a	g	0.7328	-0.05041	0.03069	0.100475	-0.09663	0.0382	0.0114199	-0.0009415	44.432	2.247e-10	1.76237e-07	1071900	705000	-?--+-	-?---+	8	0.6862	ALL.DBP.CURDRINK.COMBINED.locusleads	178.5	ALL.DBP.CURDRINK.COMBINED.locusleads;ALL.DBP.HEAVYvsLIGHT.COMBINED.locusleads;ALL.DBP.LIGHTvsNEVER.COMBINED.locusleads
rs891511	7:151007755:A_G	NOS3	known	0	7	151007755	a	g	0.3984	-0.1748	0.0275	2.06586e-10	-0.08533	0.03381	0.0116091	-0.0007544	213.203	5.054e-47	1.54408e-42	1148440	766200	-+----	+-----	10	0.7292	ALL.DBP.CURDRINK.COMBINED.locusleads	27.2	ALL.DBP.CURDRINK.COMBINED.locusleads;ALL.DBP.CURDRINK.FEMALE.locusleads;ALL.DBP.CURDRINK.FEMALE.regionleads;ALL.DBP.CURDRINK.MALE.locusleads;ALL.DBP.HEAVYvsLIGHT.COMBINED.locusleads;ALL.DBP.HEAVYvsLIGHT.FEMALE.locusleads;ALL.DBP.HEAVYvsLIGHT.FEMALE.regionleads;ALL.DBP.HEAVYvsLIGHT.MALE.locusleads;ALL.DBP.HEAVYvsNEVER.COMBINED.locusleads;ALL.DBP.LIGHTvsNEVER.COMBINED.locusleads;ALL.DBP.LIGHTvsNEVE…
rs12549629	8:9896063:C_G	LINC00599	known	-4000	8	9896063	c	g	0.7323	-0.09324	0.02465	0.000155226	-0.1206	0.04787	0.0117581	-0.0005913	40.349	1.731e-09	9.60104e-07	751263	208587	---++	+----	8	0.0321	ALL.DBP.HEAVYvsLIGHT.COMBINED.locusleads	97.27	ALL.DBP.HEAVYvsLIGHT.COMBINED.locusleads;ALL.SBP.HEAVYvsLIGHT.COMBINED.locusleads
rs76451181	17:1475682:A_G	MYO1C	known	0	17	1475682	a	g	0.0599	0.07333	0.08421	0.383864	0.2469	0.09856	0.0122426	-0.00708	39.531	2.606e-09	1.72887e-06	917352	666139	+??+++	-??++-	6	0.5075	ALL.PP.CURDRINK.COMBINED.locusleads	127.3	ALL.PP.CURDRINK.COMBINED.locusleads;EUR.PP.CURDRINK.COMBINED.locusleads;EUR.PP.HEAVYvsLIGHT.COMBINED.locusleads
rs12469847	2:112064921:C_T	TMEM87B	known	0	2	112064921	t	c	0.2619	-0.09614	0.05367	0.0732424	-0.1622	0.06487	0.0124058	-0.002876	53.047	3.027e-12	3.13165e-09	1093800	723500	--+--+	++--+-	10	0.3937	ALL.SBP.CURDRINK.COMBINED.regionleads	347.1	ALL.DBP.CURDRINK.COMBINED.locusleads;ALL.DBP.CURDRINK.COMBINED.regionleads;ALL.DBP.HEAVYvsLIGHT.COMBINED.locusleads;ALL.DBP.HEAVYvsLIGHT.COMBINED.regionleads;ALL.SBP.CURDRINK.COMBINED.locusleads;ALL.SBP.CURDRINK.COMBINED.regionleads;ALL.SBP.HEAVYvsLIGHT.COMBINED.locusleads;ALL.SBP.HEAVYvsLIGHT.COMBINED.regionleads;EUR.DBP.CURDRINK.COMBINED.locusleads;EUR.DBP.CURDRINK.COMBINED.regionleads;EUR.DBP.…
rs9388010	6:121832591:A_G	GJA1	known	382847	6	121832591	a	g	0.8051	0.1968	0.03807	2.34816e-07	0.128	0.05122	0.0124536	-0.001444	115.447	8.529e-26	4.77261e-22	1017730	661162	+?++++	-?+++-	8	7.671e-05	ALL.PP.CURDRINK.COMBINED.locusleads	95.1	ALL.DBP.CURDRINK.COMBINED.locusleads;ALL.DBP.CURDRINK.COMBINED.regionleads;ALL.DBP.CURDRINK.MALE.locusleads;ALL.DBP.CURDRINK.MALE.regionleads;ALL.DBP.LIGHTvsNEVER.MALE.locusleads;ALL.DBP.LIGHTvsNEVER.MALE.regionleads;ALL.PP.CURDRINK.COMBINED.locusleads;ALL.PP.CURDRINK.COMBINED.regionleads;ALL.PP.CURDRINK.FEMALE.locusleads;ALL.PP.CURDRINK.FEMALE.regionleads;ALL.PP.CURDRINK.MALE.locusleads;ALL.PP.C…
rs140869992	16:2108569:A_G	PKD1	known	0	16	2108569	a	g	0.0136	-0.2115	0.2875	0.461942	-0.8388	0.3363	0.0126241	-0.08263	36.751	1.046e-08	5.26657e-06	796599	582913	+??--+	-??-+-	6	0.285	ALL.SBP.CURDRINK.COMBINED.locusleads	235.3	ALL.SBP.CURDRINK.COMBINED.locusleads;EUR.DBP.HEAVYvsLIGHT.COMBINED.locusleads;EUR.SBP.HEAVYvsLIGHT.COMBINED.locusleads
rs492044	6:22060570:C_T	CASC15	known	0	6	22060570	t	c	0.6289	0.1887	0.03262	7.2601e-09	-0.1658	0.06662	0.0128196	-0.001063	33.626	4.99e-08	5.91055e-05	307313	80461	+++++	-+-+-	8	0.7126	ALL.DBP.HEAVYvsLIGHT.FEMALE.locusleads	322.5	ALL.DBP.HEAVYvsLIGHT.FEMALE.locusleads
rs12336020	9:4338104:A_T	GLIS3	known	38069	9	4338104	a	t	0.8174	0.3048	0.05501	3.01074e-08	-0.1724	0.06949	0.0131039	-0.003021	40.293	1.78e-09	1.06515e-06	1144960	764332	+-++++	------	10	0.9908	ALL.SBP.CURDRINK.COMBINED.regionleads	532.1	ALL.SBP.CURDRINK.COMBINED.locusleads;ALL.SBP.CURDRINK.COMBINED.regionleads;ALL.SBP.LIGHTvsNEVER.COMBINED.locusleads;ALL.SBP.LIGHTvsNEVER.COMBINED.regionleads
rs9897429	17:49441016:A_G	LOC101927207	known	-16844	17	49441016	a	g	0.4989	0.102	0.02184	3.00717e-06	0.1065	0.04294	0.0131307	-0.0004763	53.576	2.323e-12	2.59461e-09	748594	208199	+++++	+-+--	8	0.2969	ALL.DBP.HEAVYvsLIGHT.COMBINED.locusleads	41.16	ALL.DBP.CURDRINK.COMBINED.locusleads;ALL.DBP.HEAVYvsLIGHT.COMBINED.locusleads;ALL.SBP.CURDRINK.COMBINED.locusleads;EUR.DBP.CURDRINK.COMBINED.locusleads;EUR.DBP.HEAVYvsLIGHT.COMBINED.locusleads
rs10938397	4:45180510:A_G	GNPDA2	known	453876	4	45180510	a	g	0.6058	-0.2636	0.04557	7.27251e-09	0.1375	0.05552	0.0132646	-0.002074	49.152	2.122e-11	1.88477e-08	1151160	768194	------	++++-+	10	0.6017	ALL.SBP.CURDRINK.COMBINED.locusleads	395.1	ALL.SBP.CURDRINK.COMBINED.locusleads;ALL.SBP.CURDRINK.COMBINED.regionleads;ALL.SBP.CURDRINK.FEMALE.locusleads;ALL.SBP.CURDRINK.FEMALE.regionleads
rs72838268	6:27053394:A_G	LINC00240	known	29420	6	27053394	a	g	0.8043	-0.1407	0.03107	5.94084e-06	-0.1493	0.06059	0.0137357	-0.0009469	50.628	1.015e-11	1.02483e-08	747383	207333	++--+	----+	8	0.6619	ALL.PP.HEAVYvsLIGHT.COMBINED.locusleads	39.16	ALL.PP.HEAVYvsLIGHT.COMBINED.locusleads
rs35441	12:115115310:C_T	TBX3	known	431146	12	115115310	t	c	0.3685	-0.2941	0.02741	7.38669e-27	0.08235	0.03344	0.0137926	-0.0007512	237.011	3.417e-52	2.00572e-47	1148400	766184	-+----	+-+++-	10	0.02448	ALL.DBP.CURDRINK.COMBINED.locusleads	28.1	ALL.DBP.CURDRINK.COMBINED.locusleads;ALL.DBP.CURDRINK.COMBINED.regionleads;ALL.DBP.CURDRINK.FEMALE.locusleads;ALL.DBP.CURDRINK.FEMALE.regionleads;ALL.DBP.CURDRINK.MALE.locusleads;ALL.DBP.CURDRINK.MALE.regionleads;ALL.DBP.HEAVYvsLIGHT.COMBINED.locusleads;ALL.DBP.HEAVYvsLIGHT.COMBINED.regionleads;ALL.DBP.HEAVYvsLIGHT.FEMALE.locusleads;ALL.DBP.HEAVYvsLIGHT.FEMALE.regionleads;ALL.DBP.HEAVYvsLIGHT.MAL…
rs7294732	12:19714225:C_T	AEBP2	known	191986	12	19714225	t	c	0.6791	0.1654	0.03211	2.59041e-07	-0.09752	0.03961	0.0138163	-0.00103	35.078	2.415e-08	1.25955e-05	1147140	765121	++++++	------	10	0.3902	ALL.PP.CURDRINK.COMBINED.locusleads	35.17	ALL.PP.CURDRINK.COMBINED.locusleads
rs16851397	3:141415976:A_G	ZBTB38	known	0	3	141415976	a	g	0.9479	-0.1387	0.0677	0.0404871	-0.1986	0.08101	0.0142243	-0.004581	61.457	4.516e-14	7.2622e-11	957937	683583	-+?--+	--?---	8	0.7494	ALL.DBP.CURDRINK.COMBINED.regionleads	271.1	ALL.DBP.CURDRINK.COMBINED.locusleads;ALL.DBP.CURDRINK.COMBINED.regionleads;ALL.DBP.CURDRINK.MALE.locusleads;ALL.DBP.CURDRINK.MALE.regionleads;ALL.DBP.HEAVYvsLIGHT.COMBINED.locusleads;ALL.DBP.HEAVYvsLIGHT.COMBINED.regionleads;ALL.DBP.HEAVYvsLIGHT.MALE.locusleads;ALL.DBP.HEAVYvsLIGHT.MALE.regionleads;ALL.DBP.LIGHTvsNEVER.COMBINED.locusleads;ALL.DBP.LIGHTvsNEVER.COMBINED.regionleads;ALL.DBP.LIGHTvsN…
rs2711302	2:45993749:A_G	PRKCE	known	0	2	45993749	a	g	0.7734	0.186	0.03268	1.25888e-08	-0.09982	0.04073	0.014255	-0.001062	44.472	2.203e-10	1.73055e-07	1143910	763745	++++++	-+---+	10	0.4897	ALL.DBP.CURDRINK.COMBINED.locusleads	222.5	ALL.DBP.CURDRINK.COMBINED.locusleads
rs56743778	14:71947676:G_T	RGS6	known	0	14	71947676	t	g	0.1597	-0.3078	0.05977	2.60847e-07	0.1786	0.07295	0.0143551	-0.00357	36.014	1.513e-08	7.31076e-06	1145080	764825	-+---+	++-++-	10	0.623	ALL.SBP.CURDRINK.COMBINED.regionleads	650.1	ALL.SBP.CURDRINK.COMBINED.locusleads;ALL.SBP.CURDRINK.COMBINED.regionleads
rs12195276	6:72947991:C_T	KCNQ5	known	0	6	72947991	t	c	0.6737	-0.09084	0.03201	0.00454166	-0.09723	0.03976	0.0144683	-0.001024	71.308	3.279e-16	6.69415e-13	1146920	765012	-++---	-+-++-	10	0.08155	ALL.PP.CURDRINK.COMBINED.regionleads	209.1	ALL.PP.CURDRINK.COMBINED.locusleads;ALL.PP.CURDRINK.COMBINED.regionleads;ALL.PP.CURDRINK.FEMALE.locusleads;ALL.PP.CURDRINK.FEMALE.regionleads;ALL.PP.CURDRINK.MALE.locusleads;ALL.PP.CURDRINK.MALE.regionleads;ALL.PP.HEAVYvsLIGHT.COMBINED.locusleads;ALL.PP.HEAVYvsLIGHT.COMBINED.regionleads;ALL.PP.LIGHTvsNEVER.COMBINED.locusleads;ALL.PP.LIGHTvsNEVER.COMBINED.regionleads;ALL.SBP.CURDRINK.COMBINED.locu…
rs13091418	3:185611968:C_G	SENP2	known	0	3	185611968	c	g	0.6454	-0.04898	0.02755	0.0754271	-0.08325	0.03405	0.0144879	-0.0007586	46.692	7.262e-11	6.27777e-08	1097990	724944	-----+	-+--++	10	0.6197	ALL.DBP.CURDRINK.COMBINED.locusleads	427.1	ALL.DBP.CURDRINK.COMBINED.locusleads;ALL.DBP.CURDRINK.COMBINED.regionleads;ALL.DBP.CURDRINK.MALE.locusleads;ALL.DBP.CURDRINK.MALE.regionleads;ALL.DBP.HEAVYvsLIGHT.COMBINED.locusleads;ALL.DBP.HEAVYvsLIGHT.COMBINED.regionleads;EUR.DBP.CURDRINK.COMBINED.locusleads;EUR.DBP.CURDRINK.COMBINED.regionleads;EUR.DBP.HEAVYvsLIGHT.COMBINED.locusleads;EUR.DBP.HEAVYvsLIGHT.COMBINED.regionleads
rs6734118	2:37332212:A_C	QPCT	known	-12397	2	37332212	a	c	0.3551	-0.1855	0.06782	0.00623459	-0.2465	0.1009	0.0145652	-0.004588	40.741	1.423e-09	3.2468e-06	359329	191299	+---+	---+-	8	0.01837	ALL.SBP.HEAVYvsNEVER.COMBINED.regionleads	284.2	ALL.DBP.CURDRINK.COMBINED.locusleads;ALL.SBP.CURDRINK.COMBINED.locusleads;ALL.SBP.HEAVYvsLIGHT.COMBINED.locusleads;ALL.SBP.HEAVYvsNEVER.COMBINED.locusleads;ALL.SBP.HEAVYvsNEVER.COMBINED.regionleads;EUR.SBP.HEAVYvsNEVER.COMBINED.locusleads;EUR.SBP.HEAVYvsNEVER.COMBINED.regionleads
rs11130381	3:53815978:C_T	CHDH	known	-318	3	53815978	t	c	0.5229	0.3529	0.06107	7.53182e-09	-0.1862	0.07624	0.0145945	-0.003727	46.692	7.26e-11	1.49292e-07	494713	314623	++++++	+---++	10	0.2241	ALL.SBP.CURDRINK.FEMALE.locusleads	50.1	ALL.DBP.CURDRINK.FEMALE.locusleads;ALL.PP.CURDRINK.COMBINED.locusleads;ALL.SBP.CURDRINK.COMBINED.locusleads;ALL.SBP.CURDRINK.FEMALE.locusleads;ALL.SBP.HEAVYvsNEVER.COMBINED.locusleads;ALL.SBP.HEAVYvsNEVER.FEMALE.locusleads;ALL.SBP.LIGHTvsNEVER.COMBINED.locusleads;ALL.SBP.LIGHTvsNEVER.FEMALE.locusleads;EAS.DBP.CURDRINK.FEMALE.locusleads;EAS.DBP.HEAVYvsNEVER.FEMALE.locusleads;EAS.DBP.LIGHTvsNEVER.F…
rs607398	21:43371011:A_C	LINC00322	known	38972	21	43371011	a	c	0.6767	-0.1655	0.03819	1.46694e-05	-0.186	0.07617	0.0146099	-0.001455	47.097	5.929e-11	4.4184e-08	748135	207483	+----	----+	8	0.645	ALL.SBP.HEAVYvsLIGHT.COMBINED.regionleads	259.4	ALL.DBP.CURDRINK.COMBINED.locusleads;ALL.DBP.HEAVYvsLIGHT.COMBINED.locusleads;ALL.SBP.CURDRINK.COMBINED.locusleads;ALL.SBP.HEAVYvsLIGHT.COMBINED.locusleads;ALL.SBP.HEAVYvsLIGHT.COMBINED.regionleads;ALL.SBP.HEAVYvsNEVER.COMBINED.locusleads;ALL.SBP.HEAVYvsNEVER.COMBINED.regionleads;EUR.DBP.HEAVYvsLIGHT.COMBINED.locusleads;EUR.SBP.CURDRINK.COMBINED.locusleads;EUR.SBP.HEAVYvsLIGHT.COMBINED.locusleads…
rs4130172	2:42889285:C_T	HAAO	known	96674	2	42889285	t	c	0.3682	-0.03046	0.02805	0.277515	-0.08326	0.03412	0.0146787	-0.0007859	35.247	2.22e-08	1.05334e-05	1147610	766107	+---+-	-++--+	10	0.2706	ALL.DBP.CURDRINK.COMBINED.locusleads	135.12	ALL.DBP.CURDRINK.COMBINED.locusleads
rs12527663	6:143284949:C_G	AIG1	known	0	6	143284949	c	g	0.7612	0.07951	0.03742	0.0336033	0.1097	0.04506	0.0149111	-0.001399	61.063	5.501e-14	8.32927e-11	1143920	764662	++++-+	-+++++	10	0.3702	ALL.PP.CURDRINK.COMBINED.locusleads	201.2	ALL.PP.CURDRINK.COMBINED.locusleads;ALL.PP.CURDRINK.FEMALE.locusleads;ALL.PP.HEAVYvsLIGHT.COMBINED.locusleads;ALL.PP.HEAVYvsLIGHT.FEMALE.locusleads;ALL.PP.LIGHTvsNEVER.COMBINED.locusleads;ALL.PP.LIGHTvsNEVER.COMBINED.regionleads;EUR.PP.CURDRINK.COMBINED.locusleads;EUR.PP.HEAVYvsLIGHT.COMBINED.locusleads
rs11848164	14:39071955:C_T	SEC23A	known	0	14	39071955	t	c	0.4614	-0.1005	0.02419	3.25844e-05	-0.1154	0.04747	0.0150568	-0.0005841	45.143	1.576e-10	1.2149e-07	750570	208476	+----	----+	8	0.1512	ALL.PP.HEAVYvsLIGHT.COMBINED.regionleads	448.1	ALL.PP.CURDRINK.COMBINED.locusleads;ALL.PP.CURDRINK.COMBINED.regionleads;ALL.PP.HEAVYvsLIGHT.COMBINED.locusleads;ALL.PP.HEAVYvsLIGHT.COMBINED.regionleads;ALL.SBP.CURDRINK.COMBINED.locusleads;ALL.SBP.CURDRINK.COMBINED.regionleads;ALL.SBP.HEAVYvsLIGHT.COMBINED.locusleads;ALL.SBP.HEAVYvsLIGHT.COMBINED.regionleads
rs2085904	8:119471593:G_T	NOV	known	47155	8	119471593	t	g	0.3913	0.1632	0.03207	3.60207e-07	0.09548	0.0393	0.015119	-0.001027	154.827	2.397e-34	2.49019e-30	1095750	723725	+++++-	--++++	10	0.0003504	ALL.PP.CURDRINK.COMBINED.locusleads	6.3	ALL.PP.CURDRINK.COMBINED.locusleads;ALL.PP.CURDRINK.FEMALE.locusleads;ALL.PP.CURDRINK.MALE.locusleads;ALL.PP.HEAVYvsLIGHT.COMBINED.locusleads;ALL.PP.HEAVYvsLIGHT.FEMALE.locusleads;ALL.PP.HEAVYvsLIGHT.MALE.locusleads;ALL.PP.HEAVYvsNEVER.COMBINED.locusleads;ALL.PP.LIGHTvsNEVER.COMBINED.locusleads;ALL.PP.LIGHTvsNEVER.MALE.locusleads;ALL.SBP.CURDRINK.COMBINED.locusleads;ALL.SBP.CURDRINK.MALE.locuslea…
rs12917264	15:90877322:C_T	FURIN	known	0	15	90877322	t	c	0.0522	0.1635	0.1388	0.238815	0.3851	0.159	0.0154348	-0.01924	51.119	7.936e-12	7.5989e-09	898791	657395	+??+++	-??+++	6	0.3551	ALL.SBP.CURDRINK.COMBINED.locusleads	12.4	ALL.DBP.CURDRINK.COMBINED.locusleads;ALL.DBP.HEAVYvsLIGHT.COMBINED.locusleads;ALL.SBP.CURDRINK.COMBINED.locusleads;ALL.SBP.CURDRINK.FEMALE.locusleads;ALL.SBP.HEAVYvsLIGHT.COMBINED.locusleads
rs601338	19:48703417:A_G	FUT2	known	0	19	48703417	a	g	0.4802	0.07958	0.02229	0.000356694	0.1071	0.04431	0.0156464	-0.0004944	36.333	1.289e-08	5.56649e-06	671936	182167	+++-+	--++-	8	0.803	ALL.DBP.HEAVYvsLIGHT.COMBINED.locusleads	443.2	ALL.DBP.CURDRINK.COMBINED.locusleads;ALL.DBP.CURDRINK.COMBINED.regionleads;ALL.DBP.HEAVYvsLIGHT.COMBINED.locusleads;ALL.DBP.HEAVYvsLIGHT.COMBINED.regionleads
rs11689667	2:85264242:C_T	TCF7L1	known	0	2	85264242	t	c	0.6036	0.2485	0.03204	8.76983e-15	-0.09398	0.0389	0.0156947	-0.001025	108.683	2.511e-24	1.19771e-20	1147150	765113	+-++++	------	10	0.09142	ALL.PP.CURDRINK.COMBINED.locusleads	107.1	ALL.PP.CURDRINK.COMBINED.locusleads;ALL.PP.CURDRINK.COMBINED.regionleads;ALL.PP.CURDRINK.FEMALE.locusleads;ALL.PP.CURDRINK.FEMALE.regionleads;ALL.PP.CURDRINK.MALE.locusleads;ALL.PP.CURDRINK.MALE.regionleads;ALL.PP.HEAVYvsLIGHT.COMBINED.locusleads;ALL.PP.HEAVYvsLIGHT.COMBINED.regionleads;ALL.PP.HEAVYvsLIGHT.MALE.locusleads;ALL.PP.HEAVYvsLIGHT.MALE.regionleads;ALL.PP.HEAVYvsNEVER.COMBINED.locuslead…
rs77951330	2:163971423:A_G	FIGN	known	235420	2	163971423	a	g	0.0604	-0.2909	0.05624	2.31013e-07	-0.262	0.1087	0.0159393	-0.003161	62.054	3.35e-14	5.11122e-11	648268	177496	+?---	-?-++	6	0.6236	ALL.PP.HEAVYvsLIGHT.COMBINED.locusleads	18.6	ALL.PP.CURDRINK.COMBINED.locusleads;ALL.PP.CURDRINK.MALE.locusleads;ALL.PP.HEAVYvsLIGHT.COMBINED.locusleads;ALL.PP.HEAVYvsLIGHT.MALE.locusleads;ALL.PP.HEAVYvsNEVER.COMBINED.locusleads;ALL.PP.LIGHTvsNEVER.COMBINED.locusleads;ALL.PP.LIGHTvsNEVER.MALE.locusleads;ALL.SBP.CURDRINK.COMBINED.locusleads;ALL.SBP.CURDRINK.MALE.locusleads;ALL.SBP.HEAVYvsLIGHT.COMBINED.locusleads;ALL.SBP.HEAVYvsLIGHT.MALE.lo…
rs35892964	2:40327715:C_T	SLC8A1	known	0	2	40327715	t	c	0.7151	0.2946	0.04878	1.54726e-09	-0.1446	0.06001	0.0159701	-0.002378	54.8	1.26e-12	1.39926e-09	1147700	766146	+-++++	-+--++	10	0.1487	ALL.SBP.CURDRINK.COMBINED.regionleads	329.1	ALL.DBP.CURDRINK.COMBINED.locusleads;ALL.SBP.CURDRINK.COMBINED.locusleads;ALL.SBP.CURDRINK.COMBINED.regionleads
rs5753103	22:30372788:A_G	CCDC157,KIAA1656	known	0	22	30372788	a	g	0.5265	0.05051	0.03196	0.114012	0.09335	0.0388	0.0161315	-0.00102	44.922	1.759e-10	1.48055e-07	1151020	768146	++-+++	--++--	10	0.3777	ALL.PP.CURDRINK.COMBINED.locusleads	410.2	ALL.PP.CURDRINK.COMBINED.locusleads;ALL.PP.CURDRINK.MALE.locusleads;ALL.PP.CURDRINK.MALE.regionleads;ALL.PP.HEAVYvsLIGHT.COMBINED.locusleads;ALL.PP.HEAVYvsLIGHT.COMBINED.regionleads;ALL.PP.HEAVYvsLIGHT.MALE.locusleads;ALL.PP.HEAVYvsLIGHT.MALE.regionleads;EUR.PP.CURDRINK.COMBINED.locusleads;EUR.PP.CURDRINK.MALE.locusleads;EUR.PP.CURDRINK.MALE.regionleads;EUR.PP.HEAVYvsLIGHT.COMBINED.locusleads;EUR…
rs60078308	2:43050437:A_G	LOC102723854	known	10894	2	43050437	a	g	0.0902	-0.1108	0.05248	0.0347482	-0.1508	0.06277	0.0162869	-0.002752	61.914	3.594e-14	5.89153e-11	967039	687179	-+?---	+-?---	8	0.3211	ALL.DBP.CURDRINK.COMBINED.locusleads	135.3	ALL.DBP.CURDRINK.COMBINED.locusleads;ALL.DBP.HEAVYvsLIGHT.COMBINED.locusleads;ALL.DBP.LIGHTvsNEVER.COMBINED.locusleads;ALL.SBP.CURDRINK.COMBINED.locusleads;ALL.SBP.HEAVYvsLIGHT.COMBINED.locusleads
rs12515541	5:57799184:G_T	LOC101928539	known	-91146	5	57799184	t	g	0.6111	0.09181	0.02175	2.4306e-05	0.1026	0.04281	0.0165463	-0.0004724	45.561	1.278e-10	9.45155e-08	751310	208591	+-+++	+++--	8	0.8353	ALL.DBP.HEAVYvsLIGHT.COMBINED.regionleads	424.2	ALL.DBP.CURDRINK.COMBINED.locusleads;ALL.DBP.HEAVYvsLIGHT.COMBINED.locusleads;ALL.DBP.HEAVYvsLIGHT.COMBINED.regionleads;ALL.DBP.HEAVYvsLIGHT.MALE.locusleads;EUR.DBP.CURDRINK.COMBINED.locusleads;EUR.DBP.CURDRINK.COMBINED.regionleads;EUR.DBP.HEAVYvsLIGHT.COMBINED.locusleads
rs27712	5:97028359:C_T	LNPEP	known	0	5	97028359	t	c	0.6152	-0.04202	0.02786	0.131489	-0.08064	0.03374	0.0168465	-0.000775	43.551	3.492e-10	2.63536e-07	1147020	765059	------	----++	10	0.7344	ALL.DBP.CURDRINK.COMBINED.locusleads	293.2	ALL.DBP.CURDRINK.COMBINED.locusleads;ALL.DBP.CURDRINK.MALE.locusleads;ALL.DBP.CURDRINK.MALE.regionleads;ALL.DBP.HEAVYvsLIGHT.COMBINED.locusleads;EUR.DBP.HEAVYvsLIGHT.COMBINED.locusleads
rs57885979	5:108899825:A_T	FER	known	0	5	108899825	a	t	0.7986	0.05287	0.04209	0.209073	0.1198	0.05014	0.0168801	-0.001769	41.463	9.92e-10	7.17426e-07	1143250	764294	++-+-+	+-+++-	10	0.4083	ALL.PP.CURDRINK.COMBINED.locusleads	306.2	ALL.PP.CURDRINK.COMBINED.locusleads
rs117315912	19:2099713:A_G	IZUMO4	known	129	19	2099713	a	g	0.027	0.3017	0.08666	0.00049876	0.3959	0.1657	0.0168825	-0.007508	36.502	1.185e-08	5.62674e-06	669249	188623	+-+++	-++--	8	0.8599	ALL.PP.HEAVYvsLIGHT.COMBINED.locusleads	16.6	ALL.PP.CURDRINK.COMBINED.locusleads;ALL.PP.HEAVYvsLIGHT.COMBINED.locusleads;EUR.PP.HEAVYvsLIGHT.COMBINED.locusleads
rs77307421	6:159341566:C_T	FNDC1	known	69458	6	159341566	t	c	0.0252	0.3247	0.08857	0.000246348	0.4111	0.1723	0.0170348	-0.007842	38.202	5.065e-09	2.64407e-06	607959	171136	??++?	??+-?	2	0.2985	ALL.PP.HEAVYvsLIGHT.COMBINED.locusleads	87.3	ALL.PP.CURDRINK.COMBINED.locusleads;ALL.PP.HEAVYvsLIGHT.COMBINED.locusleads
rs762915336	5:148934298:C_CT	SH3TC2	known	-47851	5	148934298	ct	c	0.9382	0.1774	0.06059	0.00341286	0.1799	0.07541	0.0170501	-0.003666	71.522	2.946e-16	7.20958e-13	960850	660454	+?-+++	-?+++-	8	0.1914	ALL.DBP.CURDRINK.COMBINED.locusleads	113.2	ALL.DBP.CURDRINK.COMBINED.locusleads;ALL.DBP.CURDRINK.MALE.locusleads;ALL.DBP.HEAVYvsLIGHT.COMBINED.locusleads;ALL.DBP.HEAVYvsLIGHT.MALE.locusleads;ALL.DBP.LIGHTvsNEVER.COMBINED.locusleads;ALL.SBP.CURDRINK.COMBINED.locusleads;ALL.SBP.HEAVYvsLIGHT.COMBINED.locusleads;EUR.DBP.CURDRINK.COMBINED.locusleads;EUR.DBP.CURDRINK.MALE.locusleads;EUR.DBP.HEAVYvsLIGHT.COMBINED.locusleads;EUR.DBP.HEAVYvsLIGHT.…
rs2349792	11:14742738:A_G	PDE3B	known	0	11	14742738	a	g	0.477	-0.2257	0.07946	0.00450538	-0.3062	0.1286	0.0172645	-0.00631	35.66	1.805e-08	8.32137e-05	180803	72078	-----	---+-	8	0.2785	ALL.SBP.HEAVYvsNEVER.FEMALE.locusleads	665.1	ALL.SBP.HEAVYvsNEVER.FEMALE.locusleads;ALL.SBP.HEAVYvsNEVER.FEMALE.regionleads
rs2054624	17:78806016:C_T	USP36	known	0	17	78806016	t	c	0.1772	0.2944	0.04617	1.81258e-10	-0.2203	0.09279	0.0175881	-0.002129	41.497	9.751e-10	5.44319e-07	746615	207655	+++++	-+--+	8	0.49	ALL.SBP.HEAVYvsLIGHT.COMBINED.locusleads	166.2	ALL.PP.HEAVYvsLIGHT.COMBINED.locusleads;ALL.SBP.CURDRINK.COMBINED.locusleads;ALL.SBP.HEAVYvsLIGHT.COMBINED.locusleads
rs10810431	9:15706643:A_G	CCDC171	novel-T3	0	9	15706643	a	g	0.4898	-0.07607	0.06731	0.258416	-0.1939	0.08171	0.017643	-0.004523	34.965	2.555e-08	2.69321e-05	493640	314529	------	-+---+	10	0.03971	ALL.SBP.CURDRINK.FEMALE.regionleads	693.1	ALL.SBP.CURDRINK.FEMALE.locusleads;ALL.SBP.CURDRINK.FEMALE.regionleads;ALL.SBP.HEAVYvsLIGHT.FEMALE.locusleads;ALL.SBP.HEAVYvsLIGHT.FEMALE.regionleads
rs12465080	2:229874960:A_G	TRIP12	known	0	2	229874960	a	g	0.8794	0.2058	0.03357	8.76178e-10	-0.1562	0.06587	0.0177238	-0.001125	38.335	4.738e-09	2.30302e-06	712498	198724	++++-	-+---	8	0.2607	ALL.DBP.HEAVYvsLIGHT.COMBINED.locusleads	582.1	ALL.DBP.HEAVYvsLIGHT.COMBINED.locusleads;ALL.DBP.HEAVYvsLIGHT.COMBINED.regionleads;ALL.DBP.HEAVYvsLIGHT.FEMALE.locusleads;ALL.DBP.HEAVYvsLIGHT.FEMALE.regionleads
rs117971566	14:23346117:C_T	SLC22A17	known	-193	14	23346117	t	c	0.0159	0.1008	0.1697	0.552519	0.463	0.1955	0.0178707	-0.02877	33.933	4.281e-08	2.08752e-05	865866	637054	-??++-	+??+++	6	0.9733	ALL.PP.CURDRINK.COMBINED.locusleads	57.6	ALL.PP.CURDRINK.COMBINED.locusleads
rs12567136	1:11823674:C_T	CLCN6	known	0	1	11823674	t	c	0.146	-0.505	0.06402	3.06675e-15	-0.1823	0.07725	0.0182813	-0.004096	314.096	6.235e-69	5.83881e-64	1145700	766628	-+----	+++---	10	0.0001916	ALL.SBP.CURDRINK.COMBINED.regionleads	15.1	ALL.DBP.CURDRINK.COMBINED.locusleads;ALL.DBP.CURDRINK.COMBINED.regionleads;ALL.DBP.CURDRINK.FEMALE.locusleads;ALL.DBP.CURDRINK.FEMALE.regionleads;ALL.DBP.CURDRINK.MALE.locusleads;ALL.DBP.CURDRINK.MALE.regionleads;ALL.DBP.HEAVYvsLIGHT.COMBINED.locusleads;ALL.DBP.HEAVYvsLIGHT.COMBINED.regionleads;ALL.DBP.HEAVYvsLIGHT.FEMALE.locusleads;ALL.DBP.HEAVYvsLIGHT.FEMALE.regionleads;ALL.DBP.HEAVYvsLIGHT.MAL…
rs147124747	10:103308462:A_G	PCGF6	known	0	10	103308462	a	g	0.0148	-0.8339	0.1702	9.60662e-07	-0.8026	0.3403	0.0183486	-0.02897	54.843	1.233e-12	1.29882e-09	582505	164240	??-?-	??-?+	2	0.1702	ALL.SBP.HEAVYvsLIGHT.COMBINED.locusleads	8.6	ALL.PP.CURDRINK.COMBINED.locusleads;ALL.PP.HEAVYvsLIGHT.COMBINED.locusleads;ALL.SBP.CURDRINK.COMBINED.locusleads;ALL.SBP.HEAVYvsLIGHT.COMBINED.locusleads;ALL.SBP.HEAVYvsNEVER.COMBINED.locusleads;ALL.SBP.LIGHTvsNEVER.COMBINED.locusleads;EUR.SBP.CURDRINK.COMBINED.locusleads
rs750718839	13:41378878:T_TTCAC	NAA16	known	1848	13	41378878	t	ttcac	0.9214	0.3126	0.07481	2.93327e-05	0.34	0.1442	0.0183818	-0.005594	45.477	1.333e-10	9.13691e-08	670590	195956	+++--	++++-	8	0.7913	ALL.SBP.HEAVYvsLIGHT.COMBINED.locusleads	343.2	ALL.PP.CURDRINK.COMBINED.locusleads;ALL.PP.CURDRINK.COMBINED.regionleads;ALL.PP.HEAVYvsLIGHT.COMBINED.locusleads;ALL.PP.HEAVYvsLIGHT.COMBINED.regionleads;ALL.SBP.CURDRINK.COMBINED.locusleads;ALL.SBP.HEAVYvsLIGHT.COMBINED.locusleads
rs640553	20:19526396:A_C	SLC24A3	known	0	20	19526396	a	c	0.8218	-0.2534	0.0371	8.4803e-12	0.1119	0.04748	0.0184341	-0.001375	69.319	8.862e-16	1.70625e-12	1146900	764913	-+----	+-++++	10	0.3498	ALL.PP.CURDRINK.COMBINED.locusleads	53.2	ALL.PP.CURDRINK.COMBINED.locusleads;ALL.PP.LIGHTvsNEVER.COMBINED.locusleads
rs704	17:28367840:A_G	VTN	known	0	17	28367840	a	g	0.525	-0.2614	0.0451	6.79117e-09	0.1293	0.05498	0.0186846	-0.002033	51.177	7.709e-12	7.39667e-09	1142090	761378	------	--++++	10	0.5545	ALL.SBP.CURDRINK.COMBINED.locusleads	370.1	ALL.DBP.CURDRINK.COMBINED.locusleads;ALL.DBP.CURDRINK.COMBINED.regionleads;ALL.SBP.CURDRINK.COMBINED.locusleads;ALL.SBP.CURDRINK.COMBINED.regionleads;ALL.SBP.CURDRINK.MALE.locusleads;ALL.SBP.CURDRINK.MALE.regionleads;ALL.SBP.HEAVYvsNEVER.COMBINED.locusleads;ALL.SBP.HEAVYvsNEVER.COMBINED.regionleads;ALL.SBP.LIGHTvsNEVER.COMBINED.locusleads;ALL.SBP.LIGHTvsNEVER.COMBINED.regionleads
rs1902272	13:31551178:C_T	RXFP2	known	-188363	13	31551178	t	c	0.6812	0.2737	0.04662	4.33512e-09	-0.1349	0.05745	0.018868	-0.002172	51.466	6.674e-12	6.46833e-09	1147270	765171	++++++	------	10	0.2475	ALL.SBP.CURDRINK.COMBINED.locusleads	177.2	ALL.SBP.CURDRINK.COMBINED.locusleads;ALL.SBP.CURDRINK.MALE.locusleads
rs10923090	1:88522062:C_T	LOC101927891	known	-15450	1	88522062	t	c	0.4574	0.04346	0.03047	0.153776	0.08764	0.03746	0.0193064	-0.0009274	38.043	5.484e-09	3.36161e-06	1147070	765075	--++++	-+++++	10	0.04214	ALL.PP.CURDRINK.COMBINED.locusleads	78.3	ALL.PP.CURDRINK.COMBINED.locusleads;ALL.SBP.CURDRINK.COMBINED.locusleads;ALL.SBP.HEAVYvsLIGHT.COMBINED.locusleads
rs12052761	2:68838709:A_G	ARHGAP25	known	11884	2	68838709	a	g	0.4231	-0.04175	0.02654	0.115696	-0.07611	0.03261	0.0195985	-0.0007039	41.026	1.234e-09	8.18849e-07	1147180	765121	++---+	--+---	10	0.4098	ALL.DBP.CURDRINK.COMBINED.locusleads	388.2	ALL.DBP.CURDRINK.COMBINED.locusleads;ALL.DBP.CURDRINK.COMBINED.regionleads;ALL.DBP.CURDRINK.FEMALE.locusleads;ALL.DBP.CURDRINK.FEMALE.regionleads;ALL.DBP.HEAVYvsLIGHT.COMBINED.locusleads;ALL.DBP.HEAVYvsLIGHT.COMBINED.regionleads;ALL.DBP.HEAVYvsLIGHT.FEMALE.locusleads;ALL.DBP.HEAVYvsLIGHT.FEMALE.regionleads;EUR.DBP.HEAVYvsLIGHT.COMBINED.locusleads;EUR.DBP.HEAVYvsLIGHT.COMBINED.regionleads
rs3211994	16:2039027:C_T	SLC9A3R2	known	1	16	2039027	t	c	0.186	-0.08141	0.06765	0.228822	-0.1857	0.08008	0.0203988	-0.004572	40.071	1.989e-09	1.17793e-06	962801	683935	++?---	--?-+-	8	0.5107	ALL.SBP.CURDRINK.COMBINED.locusleads	235.2	ALL.DBP.CURDRINK.COMBINED.locusleads;ALL.DBP.HEAVYvsLIGHT.COMBINED.locusleads;ALL.SBP.CURDRINK.COMBINED.locusleads;EUR.SBP.HEAVYvsLIGHT.COMBINED.locusleads
rs7220814	17:7387376:A_G	TNK1	known	0	17	7387376	a	g	0.9211	0.154	0.0416	0.000213971	0.1835	0.07949	0.0209732	-0.001729	38.494	4.376e-09	2.15057e-06	723724	203181	++++-	+++-+	8	0.444	ALL.DBP.HEAVYvsLIGHT.COMBINED.locusleads	104.14	ALL.DBP.CURDRINK.COMBINED.locusleads;ALL.DBP.HEAVYvsLIGHT.COMBINED.locusleads
rs7679903	4:54231206:C_T	PDGFRA	known	0	4	54231206	t	c	0.7837	-0.1313	0.03701	0.000388626	-0.1046	0.04535	0.0210824	-0.001367	92.818	6.996e-21	2.48814e-17	1146910	764924	-+---+	-+--+-	10	0.001122	ALL.PP.CURDRINK.COMBINED.locusleads	23.2	ALL.PP.CURDRINK.COMBINED.locusleads;ALL.PP.CURDRINK.FEMALE.locusleads;ALL.PP.CURDRINK.MALE.locusleads;ALL.PP.HEAVYvsLIGHT.COMBINED.locusleads;ALL.PP.HEAVYvsLIGHT.FEMALE.locusleads;ALL.PP.HEAVYvsLIGHT.MALE.locusleads;ALL.PP.LIGHTvsNEVER.COMBINED.locusleads;EUR.PP.CURDRINK.COMBINED.locusleads;EUR.PP.CURDRINK.FEMALE.locusleads;EUR.PP.HEAVYvsLIGHT.COMBINED.locusleads
rs12978472	19:7257979:C_G	INSR	known	0	19	7257979	c	g	0.8818	0.2918	0.05127	1.25974e-08	0.1377	0.05975	0.0211888	-0.002627	227.429	4.115e-50	1.83701e-45	943486	679047	+??+++	+??+++	6	0.1791	ALL.DBP.CURDRINK.COMBINED.locusleads	32.1	ALL.DBP.CURDRINK.COMBINED.locusleads;ALL.DBP.CURDRINK.COMBINED.regionleads;ALL.DBP.CURDRINK.FEMALE.locusleads;ALL.DBP.CURDRINK.FEMALE.regionleads;ALL.DBP.CURDRINK.MALE.locusleads;ALL.DBP.CURDRINK.MALE.regionleads;ALL.DBP.HEAVYvsLIGHT.COMBINED.locusleads;ALL.DBP.HEAVYvsLIGHT.COMBINED.regionleads;ALL.DBP.HEAVYvsLIGHT.FEMALE.locusleads;ALL.DBP.HEAVYvsLIGHT.FEMALE.regionleads;ALL.DBP.HEAVYvsLIGHT.MAL…
rs62059712	17:7836852:C_T	KDM6B	known	-3064	17	7836852	t	c	0.9249	0.5444	0.07822	3.40619e-12	-0.2068	0.08975	0.0212126	-0.006116	107.022	5.761e-24	2.64393e-20	933619	670203	++?++-	+-?--+	8	0.5693	ALL.PP.CURDRINK.COMBINED.regionleads	104.2	ALL.PP.CURDRINK.COMBINED.locusleads;ALL.PP.CURDRINK.COMBINED.regionleads;ALL.PP.CURDRINK.FEMALE.locusleads;ALL.PP.CURDRINK.FEMALE.regionleads;ALL.PP.CURDRINK.MALE.locusleads;ALL.PP.HEAVYvsLIGHT.COMBINED.locusleads;ALL.PP.HEAVYvsLIGHT.COMBINED.regionleads;ALL.PP.HEAVYvsLIGHT.MALE.locusleads;ALL.PP.HEAVYvsLIGHT.MALE.regionleads;ALL.PP.LIGHTvsNEVER.COMBINED.locusleads;ALL.PP.LIGHTvsNEVER.COMBINED.re…
rs7869756	9:128448131:A_G	MIR1268A	known	0	9	128448131	a	g	0.7633	-0.1898	0.03437	3.34671e-08	0.09991	0.04338	0.0212712	-0.00118	41.905	7.952e-10	5.86302e-07	1144200	763233	-----+	+++++-	10	0.002783	ALL.PP.CURDRINK.COMBINED.regionleads	506.1	ALL.PP.CURDRINK.COMBINED.locusleads;ALL.PP.CURDRINK.COMBINED.regionleads;ALL.PP.CURDRINK.MALE.locusleads;ALL.PP.CURDRINK.MALE.regionleads;EUR.PP.CURDRINK.COMBINED.locusleads;EUR.PP.CURDRINK.COMBINED.regionleads
rs9638084	7:156519051:A_G	LINC01006	known	0	7	156519051	a	g	0.4621	0.03938	0.02748	0.151846	0.07704	0.03351	0.0215041	-0.0007546	38.757	3.836e-09	2.22937e-06	1147100	765092	+-++++	++++++	10	0.9931	ALL.DBP.CURDRINK.COMBINED.regionleads	575.1	ALL.DBP.CURDRINK.COMBINED.locusleads;ALL.DBP.CURDRINK.COMBINED.regionleads;ALL.DBP.HEAVYvsLIGHT.COMBINED.locusleads;ALL.DBP.HEAVYvsLIGHT.COMBINED.regionleads
rs1939308	11:100550697:G_T	ARHGAP42	known	-136978	11	100550697	t	g	0.3914	0.0588	0.02971	0.0478012	0.08158	0.03551	0.021597	-0.0008816	55.697	8.045e-13	1.04668e-09	1066010	737894	+?-+++	+?++--	8	0.7162	ALL.DBP.CURDRINK.COMBINED.locusleads	17.2	ALL.DBP.CURDRINK.COMBINED.locusleads;ALL.DBP.CURDRINK.MALE.locusleads;ALL.DBP.HEAVYvsLIGHT.COMBINED.locusleads;ALL.DBP.HEAVYvsLIGHT.MALE.locusleads;ALL.DBP.HEAVYvsNEVER.COMBINED.locusleads;ALL.DBP.LIGHTvsNEVER.COMBINED.locusleads;ALL.SBP.CURDRINK.COMBINED.locusleads;ALL.SBP.CURDRINK.MALE.locusleads;ALL.SBP.HEAVYvsLIGHT.COMBINED.locusleads;ALL.SBP.HEAVYvsLIGHT.MALE.locusleads;ALL.SBP.LIGHTvsNEVER.…
rs35663614	19:16327617:G_GC	KLF2	known	89	19	16327617	g	gc	0.4179	0.2241	0.0418	8.26508e-08	-0.1222	0.0532	0.0216192	-0.001745	38.213	5.036e-09	7.11817e-06	435236	274546	+?+++-	-?--++	8	0.5532	ALL.DBP.CURDRINK.FEMALE.locusleads	583.1	ALL.DBP.CURDRINK.COMBINED.locusleads;ALL.DBP.CURDRINK.COMBINED.regionleads;ALL.DBP.CURDRINK.FEMALE.locusleads;ALL.DBP.CURDRINK.FEMALE.regionleads
rs1051001	17:48060543:C_T	NFE2L1	known	0	17	48060543	t	c	0.0689	-0.369	0.07843	2.54075e-06	0.2074	0.09031	0.0216454	-0.006149	35.098	2.391e-08	1.24871e-05	933056	669133	-+?---	+-?+++	8	0.7986	ALL.PP.CURDRINK.COMBINED.locusleads	41.4	ALL.PP.CURDRINK.COMBINED.locusleads
rs2028109	15:48626906:A_C	FBN1	known	0	15	48626906	a	c	0.9106	0.6491	0.06661	1.94193e-22	-0.1786	0.0778	0.0216971	-0.004433	231.125	6.485e-51	1.07995e-46	963372	685224	++?+++	+-?--+	8	0.7626	ALL.PP.CURDRINK.COMBINED.regionleads	30.1	ALL.PP.CURDRINK.COMBINED.locusleads;ALL.PP.CURDRINK.COMBINED.regionleads;ALL.PP.CURDRINK.FEMALE.locusleads;ALL.PP.CURDRINK.FEMALE.regionleads;ALL.PP.CURDRINK.MALE.locusleads;ALL.PP.CURDRINK.MALE.regionleads;ALL.PP.HEAVYvsLIGHT.COMBINED.locusleads;ALL.PP.HEAVYvsLIGHT.COMBINED.regionleads;ALL.PP.HEAVYvsLIGHT.FEMALE.locusleads;ALL.PP.HEAVYvsLIGHT.FEMALE.regionleads;ALL.PP.HEAVYvsLIGHT.MALE.locuslead…
rs78464352	5:52900431:A_G	ITGA1	known	0	5	52900431	a	g	0.0914	-0.4397	0.06888	1.73011e-10	0.2069	0.09045	0.0221695	-0.004722	56.045	6.762e-13	7.89429e-10	1140340	761350	-----+	+-+++-	10	0.4378	ALL.SBP.CURDRINK.COMBINED.regionleads	316.1	ALL.DBP.CURDRINK.COMBINED.locusleads;ALL.DBP.CURDRINK.COMBINED.regionleads;ALL.DBP.LIGHTvsNEVER.COMBINED.locusleads;ALL.DBP.LIGHTvsNEVER.COMBINED.regionleads;ALL.SBP.CURDRINK.COMBINED.locusleads;ALL.SBP.CURDRINK.COMBINED.regionleads;ALL.SBP.CURDRINK.FEMALE.locusleads;ALL.SBP.CURDRINK.FEMALE.regionleads;ALL.SBP.LIGHTvsNEVER.COMBINED.locusleads;ALL.SBP.LIGHTvsNEVER.COMBINED.regionleads;EAS.SBP.CURD…
rs2251860	5:140668624:C_T	WDR55	known	0	5	140668624	t	c	0.5339	-0.05013	0.03015	0.0963752	-0.08468	0.03711	0.0224973	-0.0009079	41.364	1.042e-09	7.49896e-07	1142000	761337	-+--+-	+-----	10	0.7451	ALL.PP.CURDRINK.COMBINED.locusleads	517.1	ALL.PP.CURDRINK.COMBINED.locusleads;ALL.PP.CURDRINK.COMBINED.regionleads;ALL.PP.HEAVYvsLIGHT.COMBINED.locusleads
rs17633654	4:151238408:G_T	SH3D19	known	10378	4	151238408	t	g	0.054	0.1842	0.05022	0.000244588	0.2165	0.09495	0.0225989	-0.002521	38.137	5.231e-09	2.51253e-06	729330	203487	++++-	+++-+	8	0.8249	ALL.DBP.HEAVYvsLIGHT.COMBINED.regionleads	587.1	ALL.DBP.CURDRINK.COMBINED.locusleads;ALL.DBP.CURDRINK.COMBINED.regionleads;ALL.DBP.HEAVYvsLIGHT.COMBINED.locusleads;ALL.DBP.HEAVYvsLIGHT.COMBINED.regionleads
rs895505	2:42930307:C_T	LOC102723854	known	-97545	2	42930307	t	c	0.2562	0.0621	0.03155	0.049033	0.0864	0.03794	0.0227695	-0.0009945	53.353	2.597e-12	3.0341e-09	1146670	766055	+-++++	++++++	10	0.8279	ALL.DBP.CURDRINK.COMBINED.locusleads	135.6	ALL.DBP.CURDRINK.COMBINED.locusleads;ALL.DBP.HEAVYvsLIGHT.COMBINED.locusleads;ALL.DBP.HEAVYvsLIGHT.FEMALE.locusleads;EUR.DBP.CURDRINK.COMBINED.locusleads;EUR.DBP.HEAVYvsLIGHT.COMBINED.locusleads
rs7028268	9:22048415:A_G	CDKN2B-AS1	known	0	9	22048415	a	g	0.3909	-0.1418	0.02765	2.9223e-07	0.07673	0.03373	0.0229162	-0.0007637	37.476	7.282e-09	3.92147e-06	1150280	768086	------	-+++-+	10	0.01348	ALL.DBP.CURDRINK.COMBINED.locusleads	165.4	ALL.DBP.CURDRINK.COMBINED.locusleads
rs61777969	1:10737719:C_T	CASZ1	known	0	1	10737719	t	c	0.0719	-0.3726	0.119	0.00174157	-0.4262	0.1877	0.0231685	-0.01415	39.979	2.083e-09	1.22789e-06	322076	155926	-?---+	+?-++-	8	0.5883	ALL.SBP.CURDRINK.COMBINED.locusleads	19.6	ALL.DBP.CURDRINK.COMBINED.locusleads;ALL.SBP.CURDRINK.COMBINED.locusleads;ALL.SBP.HEAVYvsLIGHT.COMBINED.locusleads
rs2317704	3:101511460:C_G	SENP7	known	0	3	101511460	c	g	0.5691	-0.06155	0.02669	0.0211046	-0.07407	0.03267	0.0233769	-0.0007115	56.768	4.709e-13	6.38141e-10	1147220	765147	------	-+----	10	0.8997	ALL.DBP.CURDRINK.COMBINED.locusleads	313.1	ALL.DBP.CURDRINK.COMBINED.locusleads;ALL.DBP.CURDRINK.COMBINED.regionleads;ALL.DBP.CURDRINK.MALE.locusleads;ALL.DBP.CURDRINK.MALE.regionleads;ALL.DBP.HEAVYvsLIGHT.COMBINED.locusleads;ALL.DBP.HEAVYvsLIGHT.COMBINED.regionleads;ALL.DBP.HEAVYvsLIGHT.MALE.locusleads;ALL.DBP.HEAVYvsLIGHT.MALE.regionleads;ALL.DBP.LIGHTvsNEVER.COMBINED.locusleads;ALL.DBP.LIGHTvsNEVER.COMBINED.regionleads;ALL.DBP.LIGHTvsN…
rs9921437	16:65245354:C_T	LINC00922	known	-39144	16	65245354	t	c	0.4934	-0.1254	0.03181	8.07522e-05	-0.08735	0.03866	0.0238559	-0.001009	108.114	3.337e-24	1.57012e-20	1141330	761249	-+----	++--++	10	0.8235	ALL.PP.CURDRINK.COMBINED.locusleads	108.1	ALL.PP.CURDRINK.COMBINED.locusleads;ALL.PP.CURDRINK.COMBINED.regionleads;ALL.PP.CURDRINK.FEMALE.locusleads;ALL.PP.CURDRINK.FEMALE.regionleads;ALL.PP.CURDRINK.MALE.locusleads;ALL.PP.CURDRINK.MALE.regionleads;ALL.PP.HEAVYvsLIGHT.COMBINED.locusleads;ALL.PP.HEAVYvsLIGHT.COMBINED.regionleads;ALL.PP.HEAVYvsLIGHT.FEMALE.locusleads;ALL.PP.HEAVYvsLIGHT.FEMALE.regionleads;ALL.PP.HEAVYvsLIGHT.MALE.locuslead…
rs7635832	3:172271486:G_T	FNDC3B	known	0	3	172271486	t	g	0.785	-0.227	0.03651	5.0522e-10	0.1029	0.0458	0.0246576	-0.001331	58.66	1.829e-13	2.53139e-10	1072400	712122	-+----	++++++	10	0.5812	ALL.PP.CURDRINK.COMBINED.regionleads	294.1	ALL.PP.CURDRINK.COMBINED.locusleads;ALL.PP.CURDRINK.COMBINED.regionleads;ALL.PP.CURDRINK.MALE.locusleads;ALL.PP.CURDRINK.MALE.regionleads;ALL.PP.HEAVYvsNEVER.COMBINED.locusleads;ALL.PP.HEAVYvsNEVER.COMBINED.regionleads;ALL.SBP.CURDRINK.COMBINED.locusleads;ALL.SBP.CURDRINK.COMBINED.regionleads;ALL.SBP.HEAVYvsNEVER.COMBINED.locusleads;ALL.SBP.HEAVYvsNEVER.COMBINED.regionleads;ALL.SBP.LIGHTvsNEVER.C…
rs34688434	15:90854503:A_C	FURIN	known	-14088	15	90854503	a	c	0.0807	-0.2815	0.0712	7.69674e-05	-0.3148	0.1404	0.0249507	-0.005066	39.91	2.157e-09	1.12528e-06	660168	180013	+?--+	+?---	6	0.2292	ALL.SBP.HEAVYvsLIGHT.COMBINED.locusleads	12.6	ALL.DBP.HEAVYvsLIGHT.COMBINED.locusleads;ALL.SBP.CURDRINK.COMBINED.locusleads;ALL.SBP.HEAVYvsLIGHT.COMBINED.locusleads;EUR.SBP.CURDRINK.COMBINED.locusleads;EUR.SBP.HEAVYvsLIGHT.COMBINED.locusleads
rs8141699	22:41036540:C_T	MIR1281	known	-55972	22	41036540	t	c	0.943	0.08264	0.09631	0.390858	0.2504	0.1118	0.0251095	-0.009269	35.1	2.388e-08	3.21717e-05	504494	358975	+??+-+	-??+++	6	0.5532	ALL.DBP.CURDRINK.MALE.regionleads	690.1	ALL.DBP.CURDRINK.MALE.locusleads;ALL.DBP.CURDRINK.MALE.regionleads;ALL.DBP.HEAVYvsLIGHT.MALE.locusleads;ALL.DBP.HEAVYvsLIGHT.MALE.regionleads
rs741066	7:150803432:C_T	TMEM176A	known	0	7	150803432	t	c	0.2718	0.1113	0.02412	3.9418e-06	0.1072	0.048	0.025527	-0.0005814	48.95	2.348e-11	2.04659e-08	750218	208275	+++++	-++++	8	0.7712	ALL.DBP.HEAVYvsLIGHT.COMBINED.locusleads	27.6	ALL.DBP.CURDRINK.COMBINED.locusleads;ALL.DBP.HEAVYvsLIGHT.COMBINED.locusleads;ALL.SBP.HEAVYvsLIGHT.COMBINED.locusleads;EUR.DBP.CURDRINK.COMBINED.locusleads;EUR.DBP.HEAVYvsLIGHT.COMBINED.locusleads
rs78378222	17:7668434:G_T	TP53	known	0	17	7668434	t	g	0.9866	-1.097	0.1638	2.12463e-11	0.4103	0.1844	0.0260776	-0.02684	110.673	9.285e-25	5.82547e-21	830995	623854	-??--?	-??++?	4	0.5312	ALL.DBP.CURDRINK.COMBINED.locusleads	104.1	ALL.DBP.CURDRINK.COMBINED.locusleads;ALL.DBP.CURDRINK.COMBINED.regionleads;ALL.DBP.CURDRINK.FEMALE.locusleads;ALL.DBP.CURDRINK.FEMALE.regionleads;ALL.DBP.CURDRINK.MALE.locusleads;ALL.PP.CURDRINK.COMBINED.locusleads;ALL.PP.CURDRINK.MALE.locusleads;ALL.PP.CURDRINK.MALE.regionleads;EUR.DBP.CURDRINK.COMBINED.locusleads;EUR.DBP.CURDRINK.COMBINED.regionleads;EUR.DBP.CURDRINK.FEMALE.locusleads;EUR.DBP.C…
rs79828365	12:20024214:C_T	LOC100506393	known	0	12	20024214	t	c	0.0537	0.3452	0.05891	4.63464e-09	-0.2583	0.1162	0.0262231	-0.003469	35.093	2.397e-08	1.05124e-05	641128	176006	+?++?	-?-+?	4	0.4622	ALL.PP.HEAVYvsLIGHT.COMBINED.locusleads	35.16	ALL.PP.HEAVYvsLIGHT.COMBINED.locusleads
rs163799	20:59003192:C_T	CTSZ	known	0	20	59003192	t	c	0.4492	0.04896	0.03777	0.194884	0.09976	0.04492	0.026362	-0.001425	38.952	3.482e-09	6.13748e-06	643457	449726	-+++++	++-+++	10	0.9227	ALL.DBP.CURDRINK.MALE.locusleads	26.7	ALL.DBP.CURDRINK.COMBINED.locusleads;ALL.DBP.CURDRINK.MALE.locusleads;ALL.DBP.HEAVYvsLIGHT.COMBINED.locusleads;ALL.DBP.HEAVYvsLIGHT.MALE.locusleads;EUR.DBP.CURDRINK.COMBINED.locusleads;EUR.DBP.CURDRINK.MALE.locusleads;EUR.DBP.HEAVYvsNEVER.COMBINED.locusleads
rs4702	15:90883330:A_G	FURIN	known	0	15	90883330	a	g	0.5764	0.2254	0.04856	3.45587e-06	0.1301	0.05862	0.0264609	-0.002355	137.949	1.108e-30	1.21903e-26	1032070	709528	+++++-	-+++-+	10	0.3105	ALL.SBP.CURDRINK.COMBINED.locusleads	12.2	ALL.PP.CURDRINK.COMBINED.locusleads;ALL.PP.CURDRINK.FEMALE.locusleads;ALL.PP.CURDRINK.MALE.locusleads;ALL.PP.HEAVYvsLIGHT.COMBINED.locusleads;ALL.PP.HEAVYvsLIGHT.FEMALE.locusleads;ALL.PP.HEAVYvsLIGHT.MALE.locusleads;ALL.SBP.CURDRINK.COMBINED.locusleads;ALL.SBP.CURDRINK.MALE.locusleads;ALL.SBP.HEAVYvsLIGHT.COMBINED.locusleads;ALL.SBP.HEAVYvsLIGHT.MALE.locusleads
rs112868731	3:41841863:A_C	ULK4	known	0	3	41841863	a	c	0.8032	0.3843	0.04057	2.73181e-21	0.1143	0.05158	0.0266932	-0.001638	329.504	2.813e-72	3.43245e-67	1010370	658492	+?++++	-?-+-+	8	3.953e-05	ALL.PP.CURDRINK.COMBINED.regionleads	14.1	AFR.DBP.CURDRINK.COMBINED.locusleads;AFR.DBP.CURDRINK.COMBINED.regionleads;ALL.DBP.CURDRINK.COMBINED.locusleads;ALL.DBP.CURDRINK.COMBINED.regionleads;ALL.DBP.CURDRINK.FEMALE.locusleads;ALL.DBP.CURDRINK.FEMALE.regionleads;ALL.DBP.CURDRINK.MALE.locusleads;ALL.DBP.CURDRINK.MALE.regionleads;ALL.DBP.HEAVYvsLIGHT.COMBINED.locusleads;ALL.DBP.HEAVYvsLIGHT.COMBINED.regionleads;ALL.DBP.HEAVYvsLIGHT.FEMALE.…
rs57541197	10:61751548:A_G	C10orf107	known	0	10	61751548	a	g	0.1284	-0.2637	0.04792	3.73549e-08	-0.1238	0.05587	0.0267012	-0.002295	211.921	9.592e-47	2.84419e-42	964828	687764	--?---	-+?-+-	8	0.2917	ALL.DBP.CURDRINK.COMBINED.locusleads	40.1	ALL.DBP.CURDRINK.COMBINED.locusleads;ALL.DBP.CURDRINK.COMBINED.regionleads;ALL.DBP.CURDRINK.FEMALE.locusleads;ALL.DBP.CURDRINK.FEMALE.regionleads;ALL.DBP.CURDRINK.MALE.locusleads;ALL.DBP.CURDRINK.MALE.regionleads;ALL.DBP.HEAVYvsLIGHT.COMBINED.locusleads;ALL.DBP.HEAVYvsLIGHT.COMBINED.regionleads;ALL.DBP.HEAVYvsLIGHT.FEMALE.locusleads;ALL.DBP.HEAVYvsLIGHT.FEMALE.regionleads;ALL.DBP.HEAVYvsLIGHT.MAL…
rs112557194	15:80657784:C_T	ABHD17C	known	-37526	15	80657784	t	c	0.7013	0.1447	0.03989	0.000286206	0.1768	0.07982	0.0267612	-0.001587	34.699	2.918e-08	1.16089e-05	713204	199821	++++-	+++++	8	0.6032	ALL.SBP.HEAVYvsLIGHT.COMBINED.locusleads	51.8	ALL.DBP.CURDRINK.COMBINED.locusleads;ALL.SBP.HEAVYvsLIGHT.COMBINED.locusleads
rs34196696	12:89403923:C_T	POC1B	known	-15797	12	89403923	t	c	0.7351	0.0795	0.0499	0.111118	0.1368	0.06182	0.0269062	-0.002487	37.504	7.181e-09	3.76199e-06	1148280	766110	-+++++	++-++-	10	0.2629	ALL.SBP.CURDRINK.COMBINED.locusleads	3.14	ALL.SBP.CURDRINK.COMBINED.locusleads;ALL.SBP.HEAVYvsLIGHT.COMBINED.locusleads;EUR.SBP.CURDRINK.COMBINED.locusleads;EUR.SBP.HEAVYvsLIGHT.COMBINED.locusleads
rs3814134	9:124505410:A_G	NR5A1	known	0	9	124505410	a	g	0.8805	-0.2113	0.06184	0.000633427	-0.2339	0.1057	0.0269068	-0.003731	37.383	7.626e-09	1.01159e-05	403100	265450	-?-+-+	-?----	8	0.8295	ALL.DBP.CURDRINK.FEMALE.locusleads	90.4	ALL.DBP.CURDRINK.FEMALE.locusleads;ALL.DBP.CURDRINK.FEMALE.regionleads;ALL.PP.CURDRINK.COMBINED.locusleads;ALL.PP.CURDRINK.COMBINED.regionleads;ALL.PP.HEAVYvsLIGHT.COMBINED.locusleads;ALL.PP.HEAVYvsLIGHT.COMBINED.regionleads;ALL.SBP.CURDRINK.COMBINED.locusleads;ALL.SBP.CURDRINK.COMBINED.regionleads;ALL.SBP.CURDRINK.FEMALE.locusleads;ALL.SBP.CURDRINK.FEMALE.regionleads;ALL.SBP.LIGHTvsNEVER.COMBINE…
NA	16:65172960:G_T	LOC101927650	known	0	16	65172960	t	g	0.8273	-0.2999	0.05395	2.71557e-08	0.162	0.0733	0.0270985	-0.002907	38.559	4.237e-09	2.67474e-06	512394	265686	-?----	+?-+-+	8	0.9027	ALL.PP.CURDRINK.COMBINED.locusleads	108.2	ALL.PP.CURDRINK.COMBINED.locusleads
rs13179413	5:56572270:C_T	LOC101928448	known	0	5	56572270	t	c	0.249	0.1065	0.05367	0.047217	0.143	0.06471	0.0271149	-0.002879	51.46	6.692e-12	6.48453e-09	1148580	767860	++++--	+--+++	10	0.8097	ALL.SBP.CURDRINK.COMBINED.locusleads	244.2	ALL.DBP.CURDRINK.COMBINED.locusleads;ALL.DBP.HEAVYvsLIGHT.COMBINED.locusleads;ALL.DBP.HEAVYvsLIGHT.COMBINED.regionleads;ALL.PP.CURDRINK.COMBINED.locusleads;ALL.PP.HEAVYvsLIGHT.COMBINED.locusleads;ALL.PP.HEAVYvsLIGHT.COMBINED.regionleads;ALL.SBP.CURDRINK.COMBINED.locusleads;ALL.SBP.HEAVYvsLIGHT.COMBINED.locusleads;ALL.SBP.HEAVYvsLIGHT.COMBINED.regionleads;EUR.DBP.HEAVYvsLIGHT.COMBINED.locusleads;E…
rs11972567	7:46213679:C_T	IGFBP3	known	292407	7	46213679	t	c	0.0592	0.4988	0.09114	4.42733e-08	-0.2279	0.1036	0.0278206	-0.008304	60.081	1.267e-11	1.44991e-08	834887	631151	++-+++-?+++?+-+-?+-+-+--??++-+-+??+++--++-++-++++-++??+?++++-++	-++---+?---?+++-?++-++++??++-++-??++-+++-++-++------??+?----++-	104	0.171	EUR.PP.CURDRINK.COMBINED.locusleads	5.8	ALL.PP.CURDRINK.COMBINED.locusleads;EUR.PP.CURDRINK.COMBINED.locusleads;EUR.PP.CURDRINK.MALE.locusleads
rs681461	1:207935602:C_T	CD34	known	24264	1	207935602	t	c	0.5743	-0.1987	0.03365	3.52853e-09	0.08894	0.04044	0.0278561	-0.00113	58.398	2.085e-13	2.85567e-10	1146400	765066	-+----	++-+++	10	0.1152	ALL.PP.CURDRINK.COMBINED.locusleads	147.3	ALL.PP.CURDRINK.COMBINED.locusleads;ALL.PP.CURDRINK.FEMALE.locusleads;ALL.PP.CURDRINK.FEMALE.regionleads;ALL.PP.CURDRINK.MALE.locusleads;EUR.PP.CURDRINK.FEMALE.locusleads;EUR.PP.CURDRINK.FEMALE.regionleads
rs75478696	6:54038688:G_T	MLIP	known	0	6	54038688	t	g	0.9014	-0.3777	0.07871	1.59756e-06	0.2065	0.09421	0.0283859	-0.006192	33.927	4.294e-08	1.84977e-05	1135000	759858	-+----	---+--	10	0.3014	ALL.SBP.CURDRINK.COMBINED.locusleads	369.2	ALL.SBP.CURDRINK.COMBINED.locusleads
rs55965007	9:136626445:A_C	EGFL7	known	-32410	9	136626445	a	c	0.4675	0.1053	0.0228	3.86671e-06	0.0986	0.04504	0.0285848	-0.0005191	48.832	2.49e-11	2.15748e-08	746823	207324	+-++-	+++-+	8	0.8672	ALL.DBP.HEAVYvsLIGHT.COMBINED.locusleads	185.2	ALL.DBP.CURDRINK.COMBINED.locusleads;ALL.DBP.CURDRINK.COMBINED.regionleads;ALL.DBP.HEAVYvsLIGHT.COMBINED.locusleads;ALL.DBP.HEAVYvsLIGHT.COMBINED.regionleads;ALL.DBP.HEAVYvsLIGHT.MALE.locusleads;ALL.DBP.HEAVYvsLIGHT.MALE.regionleads;ALL.SBP.HEAVYvsLIGHT.COMBINED.locusleads;ALL.SBP.HEAVYvsLIGHT.COMBINED.regionleads;EUR.DBP.HEAVYvsLIGHT.COMBINED.locusleads;EUR.DBP.HEAVYvsLIGHT.COMBINED.regionleads;…
rs3184504	12:111446804:C_T	SH2B3	known	0	12	111446804	t	c	0.4403	0.2553	0.03305	1.12153e-14	0.08429	0.03854	0.0287368	-0.00109	348.465	2.147e-76	2.88177e-70	945830	680425	+-++++	-+-+++	10	0.7586	ALL.DBP.CURDRINK.COMBINED.regionleads	13.1	ALL.DBP.CURDRINK.COMBINED.locusleads;ALL.DBP.CURDRINK.COMBINED.regionleads;ALL.DBP.CURDRINK.FEMALE.locusleads;ALL.DBP.CURDRINK.FEMALE.regionleads;ALL.DBP.CURDRINK.MALE.locusleads;ALL.DBP.CURDRINK.MALE.regionleads;ALL.DBP.HEAVYvsLIGHT.COMBINED.locusleads;ALL.DBP.HEAVYvsLIGHT.COMBINED.regionleads;ALL.DBP.HEAVYvsLIGHT.FEMALE.locusleads;ALL.DBP.HEAVYvsLIGHT.FEMALE.regionleads;ALL.DBP.HEAVYvsLIGHT.MAL…
rs35483589	2:164024334:A_G	FIGN	known	288331	2	164024334	a	g	0.0631	-0.173	0.04411	8.78122e-05	-0.1921	0.08788	0.0288203	-0.001942	38.388	4.616e-09	2.25232e-06	743099	206572	+---+	-+---	8	0.6572	ALL.DBP.HEAVYvsLIGHT.COMBINED.locusleads	18.11	ALL.DBP.HEAVYvsLIGHT.COMBINED.locusleads
rs61911503	11:122654033:A_G	UBASH3B	known	-1656	11	122654033	a	g	0.1169	0.1701	0.03289	2.31869e-07	0.1431	0.06555	0.0290309	-0.001081	57.234	3.73e-13	4.85176e-10	735292	205359	-++-+	+++++	8	0.2297	ALL.DBP.HEAVYvsLIGHT.COMBINED.regionleads	309.1	ALL.DBP.CURDRINK.COMBINED.locusleads;ALL.DBP.HEAVYvsLIGHT.COMBINED.locusleads;ALL.DBP.HEAVYvsLIGHT.COMBINED.regionleads;ALL.DBP.HEAVYvsLIGHT.MALE.locusleads;EUR.DBP.CURDRINK.COMBINED.locusleads;EUR.DBP.CURDRINK.COMBINED.regionleads;EUR.DBP.HEAVYvsLIGHT.COMBINED.locusleads;EUR.DBP.HEAVYvsLIGHT.COMBINED.regionleads;EUR.DBP.HEAVYvsLIGHT.MALE.locusleads;EUR.DBP.HEAVYvsLIGHT.MALE.regionleads
rs760077	1:155208991:A_T	MTX1	known	0	1	155208991	a	t	0.3476	0.2878	0.04918	4.85777e-09	-0.1287	0.05903	0.0292391	-0.002415	57.689	2.972e-13	3.70146e-10	1141220	761271	+-++++	+---+-	10	0.0003863	ALL.SBP.CURDRINK.COMBINED.locusleads	303.1	ALL.DBP.CURDRINK.COMBINED.locusleads;ALL.DBP.CURDRINK.COMBINED.regionleads;ALL.DBP.CURDRINK.MALE.locusleads;ALL.DBP.CURDRINK.MALE.regionleads;ALL.DBP.HEAVYvsNEVER.COMBINED.locusleads;ALL.DBP.HEAVYvsNEVER.COMBINED.regionleads;ALL.DBP.LIGHTvsNEVER.COMBINED.locusleads;ALL.DBP.LIGHTvsNEVER.COMBINED.regionleads;ALL.SBP.CURDRINK.COMBINED.locusleads;ALL.SBP.CURDRINK.COMBINED.regionleads;ALL.SBP.CURDRINK…
rs35745826	15:78859924:A_ACT	MORF4L1	known	-12856	15	78859924	a	act	0.8281	-0.1886	0.0406	3.39549e-06	-0.1128	0.05208	0.0303189	-0.001648	106.711	6.729e-24	3.07276e-20	988239	653541	+?----	-?---+	8	0.8102	ALL.PP.CURDRINK.COMBINED.locusleads	110.1	ALL.DBP.CURDRINK.COMBINED.locusleads;ALL.DBP.CURDRINK.MALE.locusleads;ALL.PP.CURDRINK.COMBINED.locusleads;ALL.PP.CURDRINK.COMBINED.regionleads;ALL.PP.CURDRINK.FEMALE.locusleads;ALL.PP.CURDRINK.FEMALE.regionleads;ALL.PP.CURDRINK.MALE.locusleads;ALL.PP.CURDRINK.MALE.regionleads;ALL.PP.HEAVYvsLIGHT.COMBINED.locusleads;ALL.PP.HEAVYvsLIGHT.COMBINED.regionleads;ALL.PP.HEAVYvsLIGHT.FEMALE.locusleads;ALL…
rs62051143	16:72453111:C_T	PMFBP1	known	280661	16	72453111	t	c	0.9503	-0.1863	0.09232	0.0435932	-0.2272	0.105	0.030479	-0.008517	72.272	2.025e-16	4.26022e-13	1006510	714702	+-+-++	-+----	10	0.169	ALL.PP.CURDRINK.COMBINED.locusleads	22.2	ALL.PP.CURDRINK.COMBINED.locusleads;ALL.PP.CURDRINK.MALE.locusleads;ALL.PP.HEAVYvsLIGHT.COMBINED.locusleads;ALL.PP.HEAVYvsLIGHT.MALE.locusleads;ALL.PP.LIGHTvsNEVER.COMBINED.locusleads;EUR.PP.CURDRINK.COMBINED.locusleads;EUR.PP.CURDRINK.FEMALE.locusleads;EUR.PP.HEAVYvsLIGHT.COMBINED.locusleads
rs11211262	1:46255483:C_T	RAD54L	known	0	1	46255483	t	c	0.4089	-0.09008	0.02573	0.000463565	-0.1068	0.04941	0.0306563	-0.0006613	33.992	4.156e-08	1.71521e-05	709316	204805	-----	---++	8	0.763	ALL.PP.HEAVYvsLIGHT.COMBINED.locusleads	338.2	ALL.PP.HEAVYvsLIGHT.COMBINED.locusleads
rs77115054	1:58979707:A_G	LOC101926925	known	-40768	1	58979707	a	g	0.0901	-0.2963	0.04832	8.67612e-10	0.2039	0.09437	0.0307228	-0.002333	38.891	3.589e-09	1.95231e-06	653044	178275	+?---	+?+++	6	0.1695	ALL.PP.HEAVYvsLIGHT.COMBINED.locusleads	47.6	ALL.PP.HEAVYvsLIGHT.COMBINED.locusleads
rs782787180	17:81398772:C_CGGGCCTCCG	BAHCC1	known	-948	17	81398772	cgggcctccg	c	0.6741	-0.05035	0.03474	0.147243	-0.09221	0.04268	0.0307342	-0.001203	34.728	2.877e-08	1.32174e-05	933271	631723	-?+-++	+?----	8	0.09066	ALL.DBP.CURDRINK.COMBINED.locusleads	55.5	ALL.DBP.CURDRINK.COMBINED.locusleads
rs2442477	8:6496749:A_G	MCPH1	known	0	8	6496749	a	g	0.5415	-0.1851	0.03519	1.44042e-07	0.08691	0.0403	0.0310387	-0.001238	52.566	3.033e-10	2.76137e-07	834397	630988	+---++++-+----?+?------+-+--+--------+--------++----??+-+-+----	-+++----+-+-++?-?+-++++++-++-+++-++-+++++-++++--++++??++----+-+	116	0.006286	EUR.DBP.CURDRINK.COMBINED.locusleads	475.1	ALL.DBP.CURDRINK.COMBINED.locusleads;ALL.DBP.CURDRINK.COMBINED.regionleads;ALL.DBP.HEAVYvsLIGHT.COMBINED.locusleads;ALL.DBP.HEAVYvsLIGHT.COMBINED.regionleads;EUR.DBP.CURDRINK.COMBINED.locusleads;EUR.DBP.CURDRINK.COMBINED.regionleads;EUR.DBP.HEAVYvsLIGHT.COMBINED.locusleads;EUR.DBP.HEAVYvsLIGHT.COMBINED.regionleads
rs7908334	10:94206601:C_T	PLCE1	known	0	10	94206601	t	c	0.1954	0.09771	0.05634	0.0828663	0.1472	0.06838	0.0313441	-0.003171	42.747	5.218e-10	3.50814e-07	1146590	766029	++++++	-+-+--	10	0.1928	ALL.SBP.CURDRINK.COMBINED.locusleads	46.8	ALL.DBP.CURDRINK.COMBINED.locusleads;ALL.DBP.HEAVYvsLIGHT.COMBINED.locusleads;ALL.DBP.LIGHTvsNEVER.COMBINED.locusleads;ALL.SBP.CURDRINK.COMBINED.locusleads;ALL.SBP.HEAVYvsLIGHT.COMBINED.locusleads
rs2144249	6:170384996:C_T	FAM120B	known	0	6	170384996	t	c	0.7412	0.283	0.05685	6.42406e-07	-0.152	0.07091	0.032068	-0.003228	34.278	3.603e-08	1.58168e-05	1142760	762063	++++++	----++	10	0.2364	ALL.SBP.CURDRINK.COMBINED.locusleads	600.2	ALL.SBP.CURDRINK.COMBINED.locusleads;ALL.SBP.CURDRINK.MALE.locusleads;ALL.SBP.CURDRINK.MALE.regionleads
rs9294978	6:169233822:A_G	THBS2	known	0	6	169233822	a	g	0.2448	0.1119	0.02885	0.000105024	0.1223	0.05721	0.032538	-0.0008312	37.449	7.38e-09	3.69584e-06	747204	207754	+-+++	-++-+	8	0.004833	ALL.PP.HEAVYvsLIGHT.COMBINED.locusleads	85.11	ALL.PP.HEAVYvsLIGHT.COMBINED.locusleads;EUR.PP.HEAVYvsLIGHT.COMBINED.locusleads
rs832890	15:64874110:C_T	PLEKHO2	known	6108	15	64874110	t	c	0.4071	0.04941	0.0332	0.136684	0.08547	0.03999	0.0325749	-0.001102	38.775	3.804e-09	2.43005e-06	1147100	765091	-+-+++	-+++--	10	0.4522	ALL.PP.CURDRINK.COMBINED.locusleads	572.1	ALL.PP.CURDRINK.COMBINED.locusleads;ALL.PP.CURDRINK.COMBINED.regionleads;ALL.PP.HEAVYvsLIGHT.COMBINED.locusleads;ALL.PP.HEAVYvsLIGHT.COMBINED.regionleads;EUR.PP.CURDRINK.COMBINED.locusleads;EUR.PP.CURDRINK.COMBINED.regionleads
rs4300734	18:55079637:A_C	LOC101927229	known	-26266	18	55079637	a	c	0.7602	0.185	0.04269	1.46712e-05	0.1857	0.08691	0.032623	-0.001822	42.743	1.389e-08	8.64798e-06	629608	175613	-+------+-+-+-?+++++++++++-?--+-++++++-+++?-+-+??-+++-+---	+++++++-+-+---?+---+++++--+?+++++-+++--+++?--++??+--+-++++	104	0.6704	EUR.SBP.HEAVYvsLIGHT.COMBINED.locusleads	640.1	ALL.SBP.HEAVYvsLIGHT.COMBINED.locusleads;ALL.SBP.HEAVYvsLIGHT.COMBINED.regionleads;EUR.SBP.HEAVYvsLIGHT.COMBINED.locusleads;EUR.SBP.HEAVYvsLIGHT.COMBINED.regionleads
rs10167465	2:43170037:A_G	ZFP36L2	known	-52364	2	43170037	a	g	0.6233	-0.08751	0.02751	0.00146755	-0.07178	0.03365	0.0329136	-0.0007562	77.341	1.606e-17	4.74459e-14	1148430	766193	------	--+--+	10	0.2003	ALL.DBP.CURDRINK.COMBINED.locusleads	135.2	ALL.DBP.CURDRINK.COMBINED.locusleads;ALL.DBP.CURDRINK.FEMALE.locusleads;ALL.DBP.CURDRINK.MALE.locusleads;ALL.DBP.HEAVYvsLIGHT.COMBINED.locusleads;ALL.DBP.HEAVYvsLIGHT.FEMALE.locusleads;ALL.DBP.HEAVYvsLIGHT.MALE.locusleads;ALL.DBP.LIGHTvsNEVER.COMBINED.locusleads;ALL.DBP.LIGHTvsNEVER.COMBINED.regionleads;ALL.SBP.CURDRINK.COMBINED.locusleads;EUR.DBP.CURDRINK.COMBINED.locusleads;EUR.DBP.CURDRINK.FEM…
rs11867090	16:4102717:A_G	ADCY9	known	0	16	4102717	a	g	0.1112	-0.1825	0.03531	2.35971e-07	-0.1497	0.07031	0.0332425	-0.001246	56.582	2.526e-11	3.4459e-08	629643	175499	-----?+?-+--+-?----++-?-+++???-+-+----+-----++???--+-+----	-++++?-?++-+-+?+++----?+-+-???---+--++--++-+--???-+-------	94	0.1618	EUR.DBP.HEAVYvsLIGHT.COMBINED.locusleads	154.3	ALL.DBP.CURDRINK.COMBINED.locusleads;ALL.DBP.HEAVYvsLIGHT.COMBINED.locusleads;ALL.SBP.CURDRINK.COMBINED.locusleads;ALL.SBP.HEAVYvsLIGHT.COMBINED.locusleads;EUR.DBP.CURDRINK.COMBINED.locusleads;EUR.DBP.HEAVYvsLIGHT.COMBINED.locusleads;EUR.SBP.CURDRINK.COMBINED.locusleads;EUR.SBP.HEAVYvsLIGHT.COMBINED.locusleads
rs2072153	17:49312652:C_G	ZNF652	known	0	17	49312652	c	g	0.3223	-0.1455	0.0236	7.037e-10	-0.09645	0.04536	0.0334764	-0.0005563	76.902	2e-17	5.58631e-14	705538	203964	-----	-+-+-	8	0.3203	ALL.DBP.HEAVYvsLIGHT.COMBINED.locusleads	41.11	ALL.DBP.CURDRINK.COMBINED.locusleads;ALL.DBP.CURDRINK.FEMALE.locusleads;ALL.DBP.CURDRINK.MALE.locusleads;ALL.DBP.HEAVYvsLIGHT.COMBINED.locusleads;ALL.DBP.HEAVYvsLIGHT.FEMALE.locusleads;ALL.DBP.HEAVYvsLIGHT.MALE.locusleads;ALL.DBP.LIGHTvsNEVER.COMBINED.locusleads;ALL.SBP.CURDRINK.COMBINED.locusleads;ALL.SBP.CURDRINK.MALE.locusleads;ALL.SBP.HEAVYvsLIGHT.COMBINED.locusleads;ALL.SBP.HEAVYvsLIGHT.MALE…
rs34038052	3:158539107:A_AT	RSRC1	known	0	3	158539107	a	at	0.4513	0.06064	0.02799	0.0302739	0.07376	0.03474	0.033737	-0.0007829	47.269	5.441e-11	4.81988e-08	1051740	692920	-?++++	+?++++	8	0.1261	ALL.DBP.CURDRINK.COMBINED.locusleads	248.2	ALL.DBP.CURDRINK.COMBINED.locusleads;ALL.DBP.HEAVYvsLIGHT.COMBINED.locusleads;ALL.DBP.HEAVYvsLIGHT.MALE.locusleads;ALL.SBP.CURDRINK.COMBINED.locusleads;ALL.SBP.HEAVYvsLIGHT.COMBINED.locusleads
rs7279867	21:42048875:C_T	UMODL1	known	-14083	21	42048875	t	c	0.6751	0.2394	0.04704	3.59415e-07	-0.1223	0.05764	0.0338553	-0.00221	38.139	5.227e-09	2.82469e-06	1145120	763817	++++++	------	10	0.7784	ALL.SBP.CURDRINK.COMBINED.regionleads	586.1	ALL.SBP.CURDRINK.COMBINED.locusleads;ALL.SBP.CURDRINK.COMBINED.regionleads
rs373146	20:4436945:C_T	ADRA1D	known	187933	20	4436945	t	c	0.2768	-0.09793	0.02373	3.67776e-05	-0.09903	0.04676	0.034189	-0.0005624	40.887	1.323e-09	7.57846e-07	750561	208475	-----	+----	8	0.04556	ALL.DBP.HEAVYvsLIGHT.COMBINED.locusleads	241.2	ALL.DBP.CURDRINK.COMBINED.locusleads;ALL.DBP.HEAVYvsLIGHT.COMBINED.locusleads;EUR.DBP.HEAVYvsLIGHT.COMBINED.locusleads
rs11779363	8:128324207:A_G	MIR1208	known	174019	8	128324207	a	g	0.7308	0.2876	0.05266	4.72259e-08	-0.1407	0.06657	0.0345525	-0.00277	42.758	5.19e-10	3.4906e-07	1096440	723646	+-+++-	-+----	10	0.07113	ALL.SBP.CURDRINK.COMBINED.regionleads	492.1	ALL.SBP.CURDRINK.COMBINED.locusleads;ALL.SBP.CURDRINK.COMBINED.regionleads;ALL.SBP.CURDRINK.FEMALE.locusleads;ALL.SBP.CURDRINK.FEMALE.regionleads;ALL.SBP.LIGHTvsNEVER.COMBINED.locusleads
rs2888691	7:150932551:A_G	KCNH2	known	-12404	7	150932551	a	g	0.1652	-0.08281	0.03636	0.0227562	-0.09388	0.04456	0.035133	-0.001321	52.044	4.998e-12	5.47005e-09	1134050	759772	++--++	------	10	0.2895	ALL.DBP.CURDRINK.COMBINED.locusleads	27.5	ALL.DBP.CURDRINK.COMBINED.locusleads;ALL.DBP.CURDRINK.FEMALE.locusleads;ALL.DBP.HEAVYvsLIGHT.COMBINED.locusleads;ALL.DBP.HEAVYvsLIGHT.FEMALE.locusleads;ALL.DBP.LIGHTvsNEVER.COMBINED.locusleads;EUR.DBP.CURDRINK.COMBINED.locusleads
rs10828749	10:18467952:A_G	CACNB2	known	0	10	18467952	a	g	0.4154	-0.1213	0.02169	2.23902e-08	-0.08975	0.04265	0.035349	-0.0004699	64.193	1.15e-14	2.06699e-11	753977	209145	++--+	-----	8	0.0007997	ALL.DBP.HEAVYvsLIGHT.COMBINED.locusleads	34.5	ALL.DBP.CURDRINK.COMBINED.locusleads;ALL.DBP.CURDRINK.FEMALE.locusleads;ALL.DBP.CURDRINK.MALE.locusleads;ALL.DBP.HEAVYvsLIGHT.COMBINED.locusleads;ALL.DBP.HEAVYvsLIGHT.FEMALE.locusleads;ALL.DBP.HEAVYvsLIGHT.MALE.locusleads;ALL.SBP.CURDRINK.COMBINED.locusleads;ALL.SBP.CURDRINK.FEMALE.locusleads;ALL.SBP.HEAVYvsLIGHT.COMBINED.locusleads;ALL.SBP.HEAVYvsLIGHT.FEMALE.locusleads;ALL.SBP.HEAVYvsLIGHT.MALE…
rs7601637	2:37766161:A_G	LINC00211	known	-60085	2	37766161	a	g	0.7015	0.2424	0.04029	1.78359e-09	-0.1669	0.07945	0.035668	-0.001621	37.39	7.603e-09	3.52942e-06	744578	207315	+++++	---++	8	0.6436	ALL.SBP.HEAVYvsLIGHT.COMBINED.locusleads	284.3	ALL.SBP.CURDRINK.COMBINED.locusleads;ALL.SBP.HEAVYvsLIGHT.COMBINED.locusleads
rs8090822	18:44934366:C_G	SETBP1	known	0	18	44934366	c	g	0.524	0.2046	0.03225	2.23604e-10	-0.08197	0.03906	0.0358551	-0.001039	70.992	3.84e-16	7.7553e-13	1147160	765124	++++++	+++---	10	0.8945	ALL.PP.CURDRINK.COMBINED.locusleads	52.5	ALL.PP.CURDRINK.COMBINED.locusleads;ALL.PP.CURDRINK.MALE.locusleads;ALL.PP.CURDRINK.MALE.regionleads;ALL.PP.LIGHTvsNEVER.COMBINED.locusleads;ALL.PP.LIGHTvsNEVER.COMBINED.regionleads;ALL.SBP.CURDRINK.COMBINED.locusleads;EUR.PP.CURDRINK.COMBINED.locusleads;EUR.PP.CURDRINK.MALE.locusleads
rs6602177	10:17125142:C_T	CUBN	known	0	10	17125142	t	c	0.6955	-0.04476	0.03254	0.168965	-0.08238	0.03926	0.035877	-0.001058	35.208	2.262e-08	1.07105e-05	1062570	735858	+?+-++	-?----	8	0.5154	ALL.DBP.CURDRINK.COMBINED.regionleads	680.1	ALL.DBP.CURDRINK.COMBINED.locusleads;ALL.DBP.CURDRINK.COMBINED.regionleads;ALL.DBP.HEAVYvsLIGHT.COMBINED.locusleads;ALL.DBP.HEAVYvsLIGHT.COMBINED.regionleads;EUR.DBP.CURDRINK.COMBINED.locusleads;EUR.DBP.CURDRINK.COMBINED.regionleads
rs1885486	6:7695740:A_G	BMP6	known	-31037	6	7695740	a	g	0.4788	0.2404	0.04254	1.59376e-08	-0.1011	0.04832	0.0364116	-0.001809	68.745	3.508e-13	5.3437e-10	840889	635868	++--+++--++-+-++-+++++++-+-++-+++++++++++++++++++-++??-+++++++-	++++---++--++++-++-+-+--+++-++-----+-+-------+-+-+--??+--+---++	120	0.2066	EUR.PP.CURDRINK.COMBINED.regionleads	307.1	ALL.PP.CURDRINK.COMBINED.locusleads;ALL.PP.CURDRINK.COMBINED.regionleads;ALL.PP.CURDRINK.MALE.locusleads;ALL.PP.CURDRINK.MALE.regionleads;ALL.PP.HEAVYvsLIGHT.COMBINED.locusleads;ALL.PP.HEAVYvsLIGHT.COMBINED.regionleads;EUR.PP.CURDRINK.COMBINED.locusleads;EUR.PP.CURDRINK.COMBINED.regionleads;EUR.PP.CURDRINK.FEMALE.locusleads;EUR.PP.CURDRINK.FEMALE.regionleads;EUR.PP.HEAVYvsLIGHT.COMBINED.locuslead…
rs6878113	5:158096619:A_G	LOC101927697	known	-224081	5	158096619	a	g	0.2994	0.07878	0.02962	0.00782127	0.07527	0.03599	0.0364909	-0.0008763	63.524	1.606e-14	2.80851e-11	1147750	766096	-+-+++	+-++-+	10	0.03727	ALL.DBP.CURDRINK.COMBINED.locusleads	60.7	ALL.DBP.CURDRINK.COMBINED.locusleads;ALL.DBP.HEAVYvsLIGHT.COMBINED.locusleads;ALL.DBP.HEAVYvsLIGHT.FEMALE.locusleads;ALL.SBP.CURDRINK.COMBINED.locusleads;ALL.SBP.HEAVYvsLIGHT.COMBINED.locusleads
rs7562830	2:180971611:A_G	UBE2E3	known	-8773	2	180971611	a	g	0.7557	0.05242	0.03299	0.112068	0.08197	0.03934	0.0371938	-0.001088	41.702	8.802e-10	6.04767e-07	1141340	764221	--++-+	+-+++-	10	0.6348	ALL.DBP.CURDRINK.COMBINED.regionleads	512.1	ALL.DBP.CURDRINK.COMBINED.locusleads;ALL.DBP.CURDRINK.COMBINED.regionleads;ALL.DBP.HEAVYvsLIGHT.COMBINED.locusleads;ALL.DBP.HEAVYvsLIGHT.COMBINED.regionleads;ALL.SBP.CURDRINK.COMBINED.locusleads;ALL.SBP.CURDRINK.COMBINED.regionleads;ALL.SBP.HEAVYvsLIGHT.COMBINED.locusleads;ALL.SBP.HEAVYvsLIGHT.COMBINED.regionleads;EUR.DBP.CURDRINK.COMBINED.locusleads;EUR.DBP.CURDRINK.COMBINED.regionleads;EUR.DBP.…
rs2836489	21:38538756:C_T	ERG	known	0	21	38538756	t	c	0.6166	0.1154	0.0229	4.67234e-07	0.09429	0.04534	0.0375603	-0.0005241	54.1	7.311e-11	8.89802e-08	630897	175655	--++-+-++-+-++?+-++++-++++-+--+-+++++++?+--++++??+++++++-+	++-++-+-++-+-+?++-+-+-++----+--+--+++-+?++++---??++-+++-+-	106	0.9309	EUR.DBP.HEAVYvsLIGHT.COMBINED.locusleads	101.5	ALL.DBP.CURDRINK.COMBINED.locusleads;ALL.DBP.HEAVYvsLIGHT.COMBINED.locusleads;EUR.DBP.CURDRINK.COMBINED.locusleads;EUR.DBP.HEAVYvsLIGHT.COMBINED.locusleads
rs11661473	18:44597158:A_G	LOC101927921	known	65461	18	44597158	a	g	0.2244	0.07039	0.0374	0.0598244	0.09054	0.04354	0.0375744	-0.001398	55.323	9.702e-13	1.23786e-09	1064750	741078	+--+++	-+++-+	10	0.4089	ALL.DBP.CURDRINK.COMBINED.locusleads	52.6	ALL.DBP.CURDRINK.COMBINED.locusleads;ALL.DBP.CURDRINK.COMBINED.regionleads;ALL.DBP.HEAVYvsLIGHT.COMBINED.locusleads;ALL.DBP.HEAVYvsLIGHT.COMBINED.regionleads;ALL.PP.CURDRINK.COMBINED.locusleads;ALL.SBP.CURDRINK.COMBINED.locusleads;ALL.SBP.CURDRINK.FEMALE.locusleads;ALL.SBP.CURDRINK.FEMALE.regionleads;ALL.SBP.HEAVYvsLIGHT.COMBINED.locusleads;ALL.SBP.HEAVYvsLIGHT.FEMALE.locusleads;ALL.SBP.HEAVYvsLI…
rs16932207	10:31121308:A_G	ZNF438	known	89371	10	31121308	a	g	0.7239	0.05884	0.03283	0.0730908	0.08498	0.04108	0.0385793	-0.001076	36.938	9.527e-09	5.50077e-06	1147990	765911	-+++++	++++--	10	0.4182	ALL.PP.CURDRINK.COMBINED.locusleads	363.2	ALL.PP.CURDRINK.COMBINED.locusleads;ALL.PP.HEAVYvsLIGHT.COMBINED.locusleads
rs4371408	20:52407694:A_G	LOC101927700	novel-T3	-213143	20	52407694	a	g	0.6301	0.04497	0.02713	0.0974034	0.06863	0.03329	0.0392477	-0.0007353	37.271	8.068e-09	4.28956e-06	1147150	765119	+--+-+	-++++-	10	0.5876	ALL.DBP.CURDRINK.COMBINED.regionleads	608.1	ALL.DBP.CURDRINK.COMBINED.locusleads;ALL.DBP.CURDRINK.COMBINED.regionleads;ALL.DBP.HEAVYvsLIGHT.COMBINED.locusleads;ALL.DBP.HEAVYvsLIGHT.COMBINED.regionleads;ALL.SBP.HEAVYvsLIGHT.COMBINED.locusleads;ALL.SBP.HEAVYvsLIGHT.COMBINED.regionleads
rs144575549	6:169158170:A_AT	THBS2	known	-57609	6	169158170	a	at	0.0562	-0.4957	0.1008	8.75854e-07	0.2405	0.1167	0.0393183	-0.01016	43.028	1.483e-08	8.04015e-06	751351	564319	??+----?--??++?-???--?--+?++----???--+-??---?--???-??????------	??--+++?++??--?-???++?++-?-++-+-???++-+??+++?++???+??????-+++-+	72	0.7896	EUR.PP.CURDRINK.COMBINED.locusleads	85.12	ALL.PP.CURDRINK.COMBINED.locusleads;EUR.PP.CURDRINK.COMBINED.locusleads
rs1283032	4:136177315:C_T	LINC00613	novel-T3	263635	4	136177315	t	c	0.5105	0.2399	0.04841	7.2112e-07	-0.1233	0.06006	0.0400777	-0.00234	35.171	2.305e-08	1.06278e-05	1071610	704080	+?++++	-?----	8	0.9282	ALL.SBP.CURDRINK.COMBINED.locusleads	685.1	ALL.SBP.CURDRINK.COMBINED.locusleads;ALL.SBP.CURDRINK.COMBINED.regionleads
rs10036728	5:123577548:A_G	CSNK1G3	known	0	5	123577548	a	g	0.1886	-0.08927	0.03602	0.0131993	-0.08804	0.04289	0.0401024	-0.001296	63.873	1.35e-14	2.38926e-11	1139640	763758	++---+	----+-	10	0.9273	ALL.DBP.CURDRINK.COMBINED.locusleads	98.6	ALL.DBP.CURDRINK.COMBINED.locusleads;ALL.DBP.CURDRINK.FEMALE.locusleads;ALL.DBP.CURDRINK.FEMALE.regionleads;ALL.DBP.CURDRINK.MALE.locusleads;ALL.DBP.HEAVYvsLIGHT.COMBINED.locusleads;ALL.DBP.HEAVYvsLIGHT.FEMALE.locusleads;ALL.DBP.HEAVYvsLIGHT.FEMALE.regionleads;ALL.DBP.HEAVYvsNEVER.COMBINED.locusleads;ALL.DBP.HEAVYvsNEVER.COMBINED.regionleads;ALL.DBP.LIGHTvsNEVER.COMBINED.locusleads;EUR.DBP.CURDRI…
rs70992186	2:148019052:A_AT	ORC4	known	0	2	148019052	a	at	0.3221	0.05267	0.02949	0.0740945	0.07663	0.03736	0.0402549	-0.000869	34.855	2.7e-08	1.25064e-05	1001300	651675	+?-+++	+?++-+	8	0.1378	ALL.DBP.CURDRINK.COMBINED.locusleads	551.1	ALL.DBP.CURDRINK.COMBINED.locusleads
rs7560061	2:182062050:A_G	PPP1R1C	known	0	2	182062050	a	g	0.7494	-0.3663	0.07599	1.43291e-06	0.1825	0.08918	0.0407148	-0.005772	38.702	1.351e-08	4.34634e-05	220968	159859	-----?+--------+---+-+??----	++-++?-++-++++--++++--??++++	48	0.4361	EUR.DBP.HEAVYvsNEVER.COMBINED.locusleads	109.6	EUR.DBP.HEAVYvsNEVER.COMBINED.locusleads
rs17471520	7:27139171:C_T	HOXA-AS3	known	-1192	7	27139171	t	c	0.8832	-0.4402	0.06456	9.20194e-12	0.1674	0.08193	0.0410319	-0.004165	75.628	3.781e-17	8.62324e-14	1147000	765850	------	-+-++-	10	0.6129	ALL.SBP.CURDRINK.COMBINED.locusleads	24.3	ALL.DBP.CURDRINK.COMBINED.locusleads;ALL.DBP.CURDRINK.FEMALE.locusleads;ALL.DBP.HEAVYvsNEVER.COMBINED.locusleads;ALL.DBP.LIGHTvsNEVER.COMBINED.locusleads;ALL.SBP.CURDRINK.COMBINED.locusleads;ALL.SBP.CURDRINK.FEMALE.locusleads;ALL.SBP.CURDRINK.MALE.locusleads;ALL.SBP.HEAVYvsNEVER.COMBINED.locusleads;ALL.SBP.LIGHTvsNEVER.COMBINED.locusleads
rs6756350	2:43051403:G_T	LOC102723854	known	11860	2	43051403	t	g	0.2857	0.06111	0.03047	0.0449012	0.07644	0.03753	0.041673	-0.0009275	43.293	3.973e-10	2.95975e-07	1147410	766026	+-+++-	+--+++	10	0.8697	ALL.DBP.CURDRINK.COMBINED.locusleads	135.9	ALL.DBP.CURDRINK.COMBINED.locusleads;ALL.DBP.HEAVYvsLIGHT.COMBINED.locusleads
rs1466698	20:10502221:A_G	SLX4IP	known	0	20	10502221	a	g	0.1716	0.1419	0.04994	0.00449146	0.1191	0.05852	0.0418306	-0.002492	81.059	2.502e-18	6.68444e-15	959639	684399	+-?++-	++?+++	8	0.2381	ALL.PP.CURDRINK.COMBINED.locusleads	20.12	ALL.DBP.CURDRINK.COMBINED.locusleads;ALL.DBP.CURDRINK.MALE.locusleads;ALL.DBP.HEAVYvsLIGHT.COMBINED.locusleads;ALL.DBP.HEAVYvsLIGHT.MALE.locusleads;ALL.PP.CURDRINK.COMBINED.locusleads;ALL.PP.CURDRINK.MALE.locusleads;ALL.PP.HEAVYvsLIGHT.COMBINED.locusleads;ALL.PP.HEAVYvsLIGHT.MALE.locusleads;ALL.PP.LIGHTvsNEVER.COMBINED.locusleads;ALL.PP.LIGHTvsNEVER.MALE.locusleads;EUR.PP.CURDRINK.COMBINED.locusl…
rs11770302	7:74070922:C_G	ELN	known	1016	7	74070922	c	g	0.1124	-0.3601	0.07632	2.37834e-06	0.1798	0.08836	0.0418652	-0.005825	38.658	4.032e-09	5.57836e-06	620274	449980	-----	+-+-+	8	0.806	ALL.PP.LIGHTvsNEVER.COMBINED.regionleads	469.3	ALL.PP.LIGHTvsNEVER.COMBINED.locusleads;ALL.PP.LIGHTvsNEVER.COMBINED.regionleads
rs9559749	13:110248340:A_G	COL4A1	known	0	13	110248340	a	g	0.1884	0.0546	0.03589	0.128181	0.0872	0.04288	0.0419937	-0.001287	38.687	3.973e-09	2.30042e-06	1143300	765037	+--+++	-+++++	10	0.3644	ALL.DBP.CURDRINK.COMBINED.locusleads	564.2	ALL.DBP.CURDRINK.COMBINED.locusleads;ALL.DBP.CURDRINK.MALE.locusleads;ALL.DBP.CURDRINK.MALE.regionleads;ALL.DBP.HEAVYvsLIGHT.COMBINED.locusleads;ALL.DBP.HEAVYvsLIGHT.COMBINED.regionleads
rs12657492	5:148981802:C_G	SH3TC2	known	-347	5	148981802	c	g	0.5623	0.0732	0.02698	0.00666528	0.06675	0.03296	0.0428487	-0.0007269	61.637	4.127e-14	6.68363e-11	1147180	765131	++++++	---++-	10	0.08421	ALL.DBP.CURDRINK.COMBINED.locusleads	113.3	ALL.DBP.CURDRINK.COMBINED.locusleads;ALL.DBP.CURDRINK.MALE.locusleads;ALL.DBP.HEAVYvsLIGHT.COMBINED.locusleads;ALL.DBP.HEAVYvsLIGHT.MALE.locusleads
rs71415423	14:89416793:A_T	FOXN3	known	0	14	89416793	a	t	0.6719	0.1657	0.03214	2.52861e-07	-0.08044	0.03978	0.0431638	-0.001033	39.73	2.359e-09	1.58011e-06	1146640	764789	++++++	------	10	0.6697	ALL.PP.CURDRINK.COMBINED.locusleads	482.2	ALL.PP.CURDRINK.COMBINED.locusleads
rs3928894	9:21818311:C_T	MTAP	known	0	9	21818311	t	c	0.5727	0.1855	0.02767	2.02774e-11	-0.06809	0.03379	0.0438949	-0.0007647	81.283	2.236e-18	7.31175e-15	1087800	720816	++++++	-----+	10	0.1748	ALL.DBP.CURDRINK.COMBINED.regionleads	165.1	ALL.DBP.CURDRINK.COMBINED.locusleads;ALL.DBP.CURDRINK.COMBINED.regionleads;ALL.DBP.CURDRINK.FEMALE.locusleads;ALL.DBP.CURDRINK.FEMALE.regionleads;ALL.DBP.CURDRINK.MALE.locusleads;ALL.DBP.CURDRINK.MALE.regionleads;ALL.DBP.HEAVYvsLIGHT.COMBINED.locusleads;ALL.DBP.HEAVYvsLIGHT.COMBINED.regionleads;ALL.DBP.LIGHTvsNEVER.COMBINED.locusleads;ALL.DBP.LIGHTvsNEVER.COMBINED.regionleads;ALL.SBP.CURDRINK.COM…
rs4882068	11:48438903:A_C	OR4A47	known	-49889	11	48438903	a	c	0.7861	-0.1372	0.05187	0.0081673	-0.131	0.06502	0.0439293	-0.002683	53.237	2.753e-12	2.87328e-09	1148470	766210	+----+	-+--+-	10	0.2977	ALL.SBP.CURDRINK.COMBINED.locusleads	67.7	ALL.DBP.CURDRINK.COMBINED.locusleads;ALL.DBP.CURDRINK.FEMALE.locusleads;ALL.DBP.HEAVYvsLIGHT.COMBINED.locusleads;ALL.DBP.HEAVYvsLIGHT.FEMALE.locusleads;ALL.SBP.CURDRINK.COMBINED.locusleads;ALL.SBP.CURDRINK.FEMALE.locusleads;ALL.SBP.HEAVYvsLIGHT.FEMALE.locusleads
rs10759426	9:110391367:C_T	SVEP1	known	0	9	110391367	t	c	0.8469	-0.2557	0.05002	3.18841e-07	-0.1974	0.09801	0.0440011	-0.002499	54.987	1.148e-12	1.21697e-09	747942	207629	-+---	+--+-	8	0.1703	ALL.SBP.HEAVYvsLIGHT.COMBINED.locusleads	278.2	ALL.DBP.HEAVYvsLIGHT.COMBINED.locusleads;ALL.SBP.CURDRINK.COMBINED.locusleads;ALL.SBP.CURDRINK.FEMALE.locusleads;ALL.SBP.HEAVYvsLIGHT.COMBINED.locusleads;ALL.SBP.HEAVYvsLIGHT.FEMALE.locusleads;EUR.PP.HEAVYvsLIGHT.COMBINED.locusleads;EUR.PP.HEAVYvsLIGHT.COMBINED.regionleads;EUR.SBP.CURDRINK.COMBINED.locusleads;EUR.SBP.HEAVYvsLIGHT.COMBINED.locusleads;EUR.SBP.HEAVYvsLIGHT.COMBINED.regionleads
rs16886849	7:80728647:C_T	SEMA3C	known	-13890	7	80728647	t	c	0.8685	0.08204	0.0378	0.0299788	0.09459	0.047	0.0441617	-0.001428	44.639	2.027e-10	1.60419e-07	1145330	764564	+++++-	+-++-+	10	0.9899	ALL.DBP.CURDRINK.COMBINED.locusleads	252.2	ALL.DBP.CURDRINK.COMBINED.locusleads;ALL.DBP.HEAVYvsLIGHT.COMBINED.locusleads
rs35783513	2:174445275:A_G	GPR155	known	0	2	174445275	a	g	0.5618	0.4994	0.1184	2.46582e-05	-0.2576	0.128	0.0441673	-0.01402	42.429	1.118e-08	1.63921e-05	381793	328625	+-+-++-?+?++++-++++++-+-??++++	++-++-+?+?----++-+------??----	50	0.8715	EUR.SBP.LIGHTvsNEVER.COMBINED.locusleads	228.4	ALL.SBP.CURDRINK.COMBINED.locusleads;EUR.SBP.LIGHTvsNEVER.COMBINED.locusleads
rs6033019	20:11067078:G_T	LOC101929413	known	157806	20	11067078	t	g	0.0197	0.2833	0.1052	0.00708195	0.2764	0.1374	0.0442574	-0.01105	47.153	5.767e-11	5.08139e-08	815596	574843	++?+++	+-?++-	8	0.6902	ALL.DBP.CURDRINK.COMBINED.locusleads	20.2	ALL.DBP.CURDRINK.COMBINED.locusleads;ALL.DBP.CURDRINK.MALE.locusleads;ALL.DBP.HEAVYvsLIGHT.COMBINED.locusleads;ALL.DBP.LIGHTvsNEVER.COMBINED.locusleads;ALL.SBP.HEAVYvsLIGHT.COMBINED.locusleads;EUR.DBP.CURDRINK.COMBINED.locusleads;EUR.DBP.HEAVYvsLIGHT.COMBINED.locusleads;EUR.DBP.LIGHTvsNEVER.COMBINED.locusleads
rs10225553	7:35362102:A_G	LOC401324	known	0	7	35362102	a	g	0.3732	0.04699	0.02825	0.0962398	0.07061	0.03511	0.0443141	-0.0007968	34.384	3.417e-08	1.53398e-05	1070880	703825	-?++--	+?++++	8	0.6764	ALL.DBP.CURDRINK.COMBINED.locusleads	285.2	ALL.DBP.CURDRINK.COMBINED.locusleads
rs986506	4:38332910:A_G	LINC01258	known	-87751	4	38332910	a	g	0.4633	-0.09756	0.05171	0.059204	-0.1228	0.06133	0.0452543	-0.00267	47.815	4.14e-11	3.48514e-08	1142010	764452	--+---	--+-+-	10	0.909	ALL.SBP.CURDRINK.COMBINED.locusleads	191.2	ALL.PP.CURDRINK.COMBINED.locusleads;ALL.PP.HEAVYvsLIGHT.COMBINED.locusleads;ALL.PP.HEAVYvsLIGHT.COMBINED.regionleads;ALL.SBP.CURDRINK.COMBINED.locusleads;EUR.PP.HEAVYvsLIGHT.COMBINED.locusleads;EUR.PP.HEAVYvsLIGHT.COMBINED.regionleads
rs17770255	6:130889078:C_T	EPB41L2	known	0	6	130889078	t	c	0.2923	0.06921	0.05413	0.201042	0.1282	0.06404	0.0452983	-0.002928	34.798	2.778e-08	1.25408e-05	1131290	760221	++-+--	-+++++	10	0.02615	ALL.SBP.CURDRINK.COMBINED.locusleads	523.2	ALL.SBP.CURDRINK.COMBINED.locusleads;ALL.SBP.HEAVYvsLIGHT.COMBINED.locusleads;ALL.SBP.HEAVYvsLIGHT.COMBINED.regionleads
rs1582871	12:115587003:A_C	MED13L	known	-371572	12	115587003	a	c	0.3537	0.04672	0.02747	0.0889872	0.06716	0.03368	0.0461453	-0.0007542	36.908	9.675e-09	5.04092e-06	1148260	766118	++-+++	--++--	10	0.09737	ALL.DBP.CURDRINK.COMBINED.locusleads	28.13	ALL.DBP.CURDRINK.COMBINED.locusleads;ALL.DBP.HEAVYvsLIGHT.COMBINED.locusleads
rs59370398	6:63442460:T_TG	LGSN	novel-T3	122483	6	63442460	t	tg	0.5122	0.1934	0.04029	1.58508e-06	-0.09423	0.04734	0.0465365	-0.001622	38.844	3.675e-09	4.73952e-06	609477	445082	+++--	-+-++	8	0.1129	ALL.DBP.LIGHTvsNEVER.COMBINED.locusleads	570.1	ALL.DBP.CURDRINK.COMBINED.locusleads;ALL.DBP.CURDRINK.COMBINED.regionleads;ALL.DBP.LIGHTvsNEVER.COMBINED.locusleads;ALL.DBP.LIGHTvsNEVER.COMBINED.regionleads
rs9506725	13:21740007:C_T	FGF9	known	35506	13	21740007	t	c	0.672	0.2428	0.05134	2.25344e-06	0.2019	0.1017	0.0471166	-0.002632	47.942	3.887e-11	1.00596e-07	417137	120629	--++-	+++--	8	0.2993	ALL.SBP.HEAVYvsLIGHT.MALE.regionleads	406.1	ALL.DBP.CURDRINK.COMBINED.locusleads;ALL.DBP.CURDRINK.COMBINED.regionleads;ALL.DBP.CURDRINK.MALE.locusleads;ALL.DBP.CURDRINK.MALE.regionleads;ALL.DBP.HEAVYvsLIGHT.MALE.locusleads;ALL.DBP.HEAVYvsLIGHT.MALE.regionleads;ALL.PP.CURDRINK.COMBINED.locusleads;ALL.PP.CURDRINK.COMBINED.regionleads;ALL.SBP.CURDRINK.COMBINED.locusleads;ALL.SBP.CURDRINK.COMBINED.regionleads;ALL.SBP.CURDRINK.MALE.locusleads;A…
rs879620	16:3965728:C_T	ADCY9	known	0	16	3965728	t	c	0.5175	0.06857	0.04046	0.0901209	0.09479	0.04775	0.0471299	-0.001635	44.03	2.748e-10	4.79887e-07	625821	452596	-++++	+++-+	8	0.9406	ALL.DBP.LIGHTvsNEVER.COMBINED.locusleads	154.4	ALL.DBP.CURDRINK.COMBINED.locusleads;ALL.DBP.HEAVYvsLIGHT.COMBINED.locusleads;ALL.DBP.LIGHTvsNEVER.COMBINED.locusleads;ALL.DBP.LIGHTvsNEVER.MALE.locusleads;ALL.DBP.LIGHTvsNEVER.MALE.regionleads;EUR.DBP.LIGHTvsNEVER.MALE.locusleads;EUR.DBP.LIGHTvsNEVER.MALE.regionleads
rs12481717	20:32627862:A_G	C20orf203	known	-3762	20	32627862	a	g	0.2171	0.1687	0.05481	0.00208461	0.1366	0.06884	0.0472211	-0.002986	61.725	3.95e-14	5.69037e-11	1134070	759777	+-++++	++++++	10	0.6246	ALL.SBP.CURDRINK.COMBINED.regionleads	270.1	ALL.PP.CURDRINK.COMBINED.locusleads;ALL.PP.CURDRINK.COMBINED.regionleads;ALL.PP.CURDRINK.MALE.locusleads;ALL.PP.CURDRINK.MALE.regionleads;ALL.PP.HEAVYvsLIGHT.COMBINED.locusleads;ALL.PP.HEAVYvsLIGHT.COMBINED.regionleads;ALL.PP.HEAVYvsLIGHT.MALE.locusleads;ALL.PP.HEAVYvsLIGHT.MALE.regionleads;ALL.SBP.CURDRINK.COMBINED.locusleads;ALL.SBP.CURDRINK.COMBINED.regionleads;ALL.SBP.CURDRINK.MALE.locusleads…
rs2403661	11:13263734:G_T	ARNTL	known	-14043	11	13263734	t	g	0.334	-0.09949	0.02773	0.000333466	-0.06781	0.03418	0.047266	-0.0007683	82.678	1.114e-18	3.74373e-15	1150910	768080	----+-	-+----	10	0.4388	ALL.DBP.CURDRINK.COMBINED.regionleads	161.1	ALL.DBP.CURDRINK.COMBINED.locusleads;ALL.DBP.CURDRINK.COMBINED.regionleads;ALL.DBP.CURDRINK.FEMALE.locusleads;ALL.DBP.CURDRINK.FEMALE.regionleads;ALL.DBP.CURDRINK.MALE.locusleads;ALL.DBP.CURDRINK.MALE.regionleads;ALL.DBP.HEAVYvsLIGHT.COMBINED.locusleads;ALL.DBP.HEAVYvsLIGHT.COMBINED.regionleads;ALL.DBP.HEAVYvsLIGHT.FEMALE.locusleads;ALL.DBP.HEAVYvsLIGHT.FEMALE.regionleads;ALL.DBP.HEAVYvsLIGHT.MAL…
rs35514860	19:4966178:C_G	KDM4B	known	-2934	19	4966178	c	g	0.3028	-0.157	0.02723	8.13198e-09	-0.1065	0.05384	0.0479193	-0.0007403	65.344	6.468e-15	1.13091e-11	741402	206693	----+	++---	8	0.4955	ALL.PP.HEAVYvsLIGHT.COMBINED.regionleads	180.2	ALL.DBP.CURDRINK.COMBINED.locusleads;ALL.PP.CURDRINK.COMBINED.locusleads;ALL.PP.CURDRINK.COMBINED.regionleads;ALL.PP.CURDRINK.MALE.locusleads;ALL.PP.CURDRINK.MALE.regionleads;ALL.PP.HEAVYvsLIGHT.COMBINED.locusleads;ALL.PP.HEAVYvsLIGHT.COMBINED.regionleads;ALL.PP.HEAVYvsLIGHT.MALE.locusleads;ALL.PP.HEAVYvsLIGHT.MALE.regionleads;ALL.PP.HEAVYvsNEVER.COMBINED.locusleads;ALL.PP.HEAVYvsNEVER.COMBINED.r…
rs75029446	19:4701715:C_T	DPP9	known	0	19	4701715	t	c	0.0454	-0.5093	0.09302	4.371e-08	0.2505	0.1269	0.0483823	-0.008644	38.918	3.54e-09	1.98595e-06	1118850	747478	-----+	-++++-	10	0.7282	ALL.SBP.CURDRINK.COMBINED.locusleads	180.4	ALL.PP.CURDRINK.COMBINED.locusleads;ALL.SBP.CURDRINK.COMBINED.locusleads
rs116705782	16:82977624:A_G	CDH13,LOC101928417	known	0	16	82977624	a	g	0.0434	-0.4779	0.09425	3.96653e-07	0.2155	0.1096	0.0492708	-0.008882	47.671	4.45e-11	4.16232e-08	946400	680115	-+?--+	++?++-	8	0.3389	ALL.PP.CURDRINK.COMBINED.locusleads	37.5	ALL.PP.CURDRINK.COMBINED.locusleads;ALL.PP.HEAVYvsLIGHT.COMBINED.locusleads
rs73083362	20:10703347:A_G	JAG1	known	29301	20	10703347	a	g	0.2362	-0.1527	0.0394	0.000106347	-0.09183	0.04675	0.0494979	-0.001552	109.156	1.981e-24	9.51896e-21	1144080	764685	++----	-+--++	10	0.01498	ALL.PP.CURDRINK.COMBINED.locusleads	20.6	ALL.PP.CURDRINK.COMBINED.locusleads;ALL.PP.CURDRINK.FEMALE.locusleads;ALL.PP.CURDRINK.MALE.locusleads;ALL.PP.HEAVYvsLIGHT.COMBINED.locusleads;ALL.PP.HEAVYvsLIGHT.FEMALE.locusleads;ALL.PP.HEAVYvsLIGHT.MALE.locusleads;ALL.PP.LIGHTvsNEVER.COMBINED.locusleads;ALL.PP.LIGHTvsNEVER.MALE.locusleads;ALL.SBP.CURDRINK.COMBINED.locusleads;ALL.SBP.CURDRINK.MALE.locusleads;ALL.SBP.HEAVYvsLIGHT.COMBINED.locusle…
rs4677956	3:122492107:A_G	KPNA1	known	0	3	122492107	a	g	0.272	0.1794	0.02935	9.81216e-10	-0.1066	0.05432	0.0497107	-0.0008606	39.888	3.222e-08	1.78987e-05	539144	160572	+-++--+-?-?-?-+++++?-++?-+--++-+?+??-++++?+???-?????+??+++	-+-----+?+?+?----+-?+--?+-+---+-?-??+----?+???-?????-??++-	76	0.329	EUR.DBP.HEAVYvsLIGHT.COMBINED.regionleads	713.1	ALL.DBP.HEAVYvsLIGHT.COMBINED.locusleads;ALL.DBP.HEAVYvsLIGHT.COMBINED.regionleads;EUR.DBP.HEAVYvsLIGHT.COMBINED.locusleads;EUR.DBP.HEAVYvsLIGHT.COMBINED.regionleads
rs56388530	4:105989801:C_T	NPNT	known	18130	4	105989801	t	c	0.7281	0.2248	0.04843	3.45469e-06	0.118	0.06028	0.050285	-0.002341	111.924	4.965e-25	2.94359e-21	1145730	764456	+-++++	+-++-+	10	0.7926	ALL.SBP.CURDRINK.COMBINED.locusleads	102.1	ALL.DBP.CURDRINK.COMBINED.locusleads;ALL.DBP.CURDRINK.COMBINED.regionleads;ALL.DBP.CURDRINK.FEMALE.locusleads;ALL.DBP.CURDRINK.FEMALE.regionleads;ALL.DBP.CURDRINK.MALE.locusleads;ALL.DBP.CURDRINK.MALE.regionleads;ALL.DBP.HEAVYvsLIGHT.COMBINED.locusleads;ALL.DBP.HEAVYvsLIGHT.COMBINED.regionleads;ALL.DBP.HEAVYvsLIGHT.MALE.locusleads;ALL.DBP.HEAVYvsLIGHT.MALE.regionleads;ALL.DBP.LIGHTvsNEVER.COMBINE…
rs7451008	6:20673649:C_T	CDKAL1	known	0	6	20673649	t	c	0.6988	-0.1836	0.03238	1.42659e-08	0.07866	0.04019	0.0503236	-0.001048	51.477	6.635e-12	7.18937e-09	1147630	766122	-+----	+-++--	10	0.4625	ALL.PP.CURDRINK.COMBINED.locusleads	361.1	ALL.PP.CURDRINK.COMBINED.locusleads;ALL.PP.CURDRINK.COMBINED.regionleads;ALL.PP.CURDRINK.MALE.locusleads;ALL.PP.CURDRINK.MALE.regionleads;ALL.SBP.CURDRINK.COMBINED.locusleads;ALL.SBP.CURDRINK.COMBINED.regionleads
rs72851229	3:29332728:C_G	RBMS3	known	0	3	29332728	c	g	0.1684	-0.0603	0.03533	0.0878658	-0.08432	0.0431	0.0504203	-0.001247	37.13	8.654e-09	4.56519e-06	1146950	764942	-+----	-----+	10	0.749	ALL.DBP.CURDRINK.COMBINED.regionleads	612.1	ALL.DBP.CURDRINK.COMBINED.locusleads;ALL.DBP.CURDRINK.COMBINED.regionleads
rs10766303	11:16217830:C_T	SOX6	known	0	11	16217830	t	c	0.4964	0.09166	0.02647	0.000534609	0.06328	0.03237	0.0505953	-0.0007001	80.802	2.844e-18	9.20573e-15	1148270	766126	+-++++	-+++++	10	0.7306	ALL.DBP.CURDRINK.COMBINED.locusleads	71.3	ALL.DBP.CURDRINK.COMBINED.locusleads;ALL.DBP.CURDRINK.FEMALE.locusleads;ALL.DBP.CURDRINK.MALE.locusleads;ALL.DBP.HEAVYvsLIGHT.COMBINED.locusleads;ALL.DBP.HEAVYvsLIGHT.MALE.locusleads;ALL.DBP.LIGHTvsNEVER.COMBINED.locusleads;ALL.DBP.LIGHTvsNEVER.FEMALE.locusleads;ALL.SBP.CURDRINK.COMBINED.locusleads;ALL.SBP.HEAVYvsLIGHT.COMBINED.locusleads;ALL.SBP.LIGHTvsNEVER.COMBINED.locusleads
rs576603	11:1892909:C_T	LSP1	known	646	11	1892909	t	c	0.421	0.4886	0.04771	1.29834e-24	-0.1129	0.05777	0.0506656	-0.00227	235.397	7.66e-52	2.94323e-47	1135220	760127	++++++	-+----	10	0.7575	ALL.SBP.CURDRINK.COMBINED.locusleads	29.1	ALL.DBP.CURDRINK.COMBINED.locusleads;ALL.DBP.CURDRINK.COMBINED.regionleads;ALL.DBP.CURDRINK.FEMALE.locusleads;ALL.DBP.CURDRINK.FEMALE.regionleads;ALL.DBP.CURDRINK.MALE.locusleads;ALL.DBP.CURDRINK.MALE.regionleads;ALL.DBP.HEAVYvsLIGHT.COMBINED.locusleads;ALL.DBP.HEAVYvsLIGHT.COMBINED.regionleads;ALL.DBP.HEAVYvsLIGHT.FEMALE.locusleads;ALL.DBP.HEAVYvsLIGHT.FEMALE.regionleads;ALL.DBP.HEAVYvsLIGHT.MAL…
rs9912738	17:49433222:C_T	PHB	known	18317	17	49433222	t	c	0.6272	-0.109	0.02729	6.49303e-05	-0.06543	0.03352	0.0509419	-0.000744	95.754	1.612e-21	7.43362e-18	1147030	765069	------	++--+-	10	0.00309	ALL.DBP.CURDRINK.COMBINED.locusleads	41.6	ALL.DBP.CURDRINK.COMBINED.locusleads;ALL.DBP.CURDRINK.MALE.locusleads;ALL.DBP.HEAVYvsLIGHT.COMBINED.locusleads;ALL.DBP.HEAVYvsLIGHT.FEMALE.locusleads;ALL.DBP.HEAVYvsLIGHT.MALE.locusleads;ALL.DBP.HEAVYvsNEVER.MALE.locusleads;ALL.DBP.LIGHTvsNEVER.COMBINED.locusleads;ALL.SBP.CURDRINK.MALE.locusleads;ALL.SBP.HEAVYvsLIGHT.MALE.locusleads
rs12656497	5:32831833:C_T	NPR3	known	40109	5	32831833	t	c	0.41	-0.441	0.04435	2.68847e-23	-0.1062	0.05441	0.0509564	-0.001966	399.577	1.71e-87	8.00671e-82	1151170	768199	------	-+----	10	0.02502	ALL.SBP.CURDRINK.COMBINED.locusleads	7.1	ALL.DBP.CURDRINK.COMBINED.locusleads;ALL.DBP.CURDRINK.COMBINED.regionleads;ALL.DBP.CURDRINK.FEMALE.locusleads;ALL.DBP.CURDRINK.FEMALE.regionleads;ALL.DBP.CURDRINK.MALE.locusleads;ALL.DBP.CURDRINK.MALE.regionleads;ALL.DBP.HEAVYvsLIGHT.COMBINED.locusleads;ALL.DBP.HEAVYvsLIGHT.COMBINED.regionleads;ALL.DBP.HEAVYvsLIGHT.FEMALE.locusleads;ALL.DBP.HEAVYvsLIGHT.FEMALE.regionleads;ALL.DBP.HEAVYvsLIGHT.MAL…
rs28704736	11:896081:C_T	CHID1	known	0	11	896081	t	c	0.4484	0.2739	0.04717	6.37326e-09	-0.1143	0.05868	0.0514326	-0.002222	54.436	1.511e-12	1.65491e-09	1068860	702383	+?++++	-?---+	8	0.6521	ALL.SBP.CURDRINK.COMBINED.locusleads	242.2	ALL.DBP.CURDRINK.COMBINED.locusleads;ALL.PP.CURDRINK.COMBINED.locusleads;ALL.PP.CURDRINK.FEMALE.locusleads;ALL.PP.CURDRINK.FEMALE.regionleads;ALL.PP.LIGHTvsNEVER.COMBINED.locusleads;ALL.SBP.CURDRINK.COMBINED.locusleads;ALL.SBP.CURDRINK.COMBINED.regionleads;ALL.SBP.LIGHTvsNEVER.COMBINED.locusleads;ALL.SBP.LIGHTvsNEVER.COMBINED.regionleads;EUR.PP.CURDRINK.COMBINED.locusleads;EUR.PP.CURDRINK.COMBINE…
NA	6:61178678:C_CA	MTRNR2L9	known	-395424	6	61178678	ca	c	0.4935	0.4104	0.1043	8.32648e-05	-0.2128	0.1093	0.0515425	-0.01087	51.504	4.421e-10	3.54436e-07	389099	355119	???-+??????????-????+????????????????????????????????????+?????	???--??????????+????-????????????????????????????????????-?????	8	0.5897	EUR.PP.CURDRINK.COMBINED.regionleads	488	ALL.PP.CURDRINK.COMBINED.regionleads;ALL.PP.HEAVYvsLIGHT.COMBINED.regionleads;EUR.PP.CURDRINK.COMBINED.regionleads;EUR.PP.HEAVYvsLIGHT.COMBINED.regionleads;EUR.PP.LIGHTvsNEVER.COMBINED.regionleads
rs73040771	19:29860012:C_T	CCNE1	known	35704	19	29860012	t	c	0.0737	-0.2454	0.04782	2.8707e-07	0.1163	0.06005	0.0527797	-0.002281	38.731	3.887e-09	2.25614e-06	1135850	760119	-+----	++++++	10	0.8129	ALL.DBP.CURDRINK.COMBINED.locusleads	100.2	ALL.DBP.CURDRINK.COMBINED.locusleads
rs12629635	3:158604280:C_T	MLF1	known	0	3	158604280	t	c	0.1655	0.1046	0.03558	0.00328367	0.08398	0.0435	0.0535357	-0.001265	65.256	6.759e-15	1.2673e-11	1132420	759323	--++--	++++++	10	0.7025	ALL.DBP.CURDRINK.COMBINED.locusleads	248.1	ALL.DBP.CURDRINK.COMBINED.locusleads;ALL.DBP.CURDRINK.COMBINED.regionleads;ALL.DBP.CURDRINK.MALE.locusleads;ALL.DBP.CURDRINK.MALE.regionleads;ALL.DBP.HEAVYvsLIGHT.COMBINED.locusleads;ALL.DBP.HEAVYvsLIGHT.COMBINED.regionleads;ALL.DBP.HEAVYvsLIGHT.MALE.locusleads;ALL.DBP.HEAVYvsLIGHT.MALE.regionleads;ALL.DBP.LIGHTvsNEVER.COMBINED.locusleads;ALL.DBP.LIGHTvsNEVER.COMBINED.regionleads;ALL.DBP.LIGHTvsN…
rs11617458	13:98215191:A_G	FARP1	known	0	13	98215191	a	g	0.7505	0.2265	0.04883	3.50876e-06	-0.1071	0.05549	0.0535972	-0.002383	41.961	2.308e-08	1.19667e-05	839401	634611	+--+++-+---++--+?++++-+--?-+--+-++-+++-++++--+++++++??-+++-+++-	-++--+-+++---++-?---++-++?+----+--+-+-+----++----+--??+---+-+-+	116	0.474	EUR.PP.CURDRINK.COMBINED.regionleads	686.1	ALL.PP.CURDRINK.COMBINED.locusleads;ALL.PP.CURDRINK.COMBINED.regionleads;EUR.PP.CURDRINK.COMBINED.locusleads;EUR.PP.CURDRINK.COMBINED.regionleads
rs6538388	12:93123012:C_T	LOC643339	known	0	12	93123012	t	c	0.1216	-0.3513	0.06284	2.26562e-08	0.1579	0.082	0.0541531	-0.003946	44.656	2.009e-10	1.47484e-07	1129060	754999	------	+--++-	10	0.1371	ALL.SBP.CURDRINK.COMBINED.locusleads	458.1	ALL.SBP.CURDRINK.COMBINED.locusleads;ALL.SBP.CURDRINK.COMBINED.regionleads
rs7933475	11:9963486:A_T	SBF2	known	0	11	9963486	a	t	0.6001	-0.1167	0.04702	0.0130676	-0.1103	0.05737	0.0545293	-0.002209	53.564	2.337e-12	2.47425e-09	1098050	724969	-+----	-----+	10	0.3346	ALL.SBP.CURDRINK.COMBINED.locusleads	65.5	ALL.DBP.LIGHTvsNEVER.MALE.locusleads;ALL.SBP.CURDRINK.COMBINED.locusleads;ALL.SBP.HEAVYvsLIGHT.MALE.locusleads;ALL.SBP.LIGHTvsNEVER.COMBINED.locusleads;ALL.SBP.LIGHTvsNEVER.FEMALE.locusleads;EUR.SBP.CURDRINK.MALE.locusleads
rs12702584	7:7155049:C_T	C1GALT1	known	-27565	7	7155049	t	c	0.7932	-0.1266	0.02634	1.53689e-06	-0.09944	0.05183	0.0550375	-0.0006935	48.7	2.661e-11	2.28928e-08	749415	208302	----+	++-+-	8	0.4883	ALL.DBP.HEAVYvsLIGHT.COMBINED.locusleads	305.2	ALL.DBP.CURDRINK.COMBINED.locusleads;ALL.DBP.HEAVYvsLIGHT.COMBINED.locusleads;ALL.DBP.HEAVYvsLIGHT.MALE.locusleads
rs117376447	8:119623644:A_G	ENPP2	known	0	8	119623644	a	g	0.081	0.184	0.06196	0.00298132	0.1417	0.07396	0.0553778	-0.003837	73.732	9.756e-17	2.15825e-13	1136870	761738	-++++-	+--+-+	10	0.004407	ALL.PP.CURDRINK.COMBINED.locusleads	6.6	ALL.PP.CURDRINK.COMBINED.locusleads;ALL.PP.CURDRINK.FEMALE.locusleads;ALL.PP.CURDRINK.MALE.locusleads;ALL.PP.HEAVYvsLIGHT.COMBINED.locusleads;ALL.PP.LIGHTvsNEVER.COMBINED.locusleads
rs200672760	17:41814751:G_GT	FKBP10	known	0	17	41814751	g	gt	0.9099	-0.21	0.04699	7.85729e-06	-0.1679	0.08785	0.0559773	-0.002205	45.852	1.105e-10	8.84281e-08	672857	196524	+--+-	++--+	8	0.5891	ALL.PP.HEAVYvsLIGHT.COMBINED.locusleads	433.1	ALL.PP.CURDRINK.COMBINED.locusleads;ALL.PP.CURDRINK.MALE.locusleads;ALL.PP.HEAVYvsLIGHT.COMBINED.locusleads;ALL.PP.HEAVYvsLIGHT.MALE.locusleads;ALL.PP.HEAVYvsLIGHT.MALE.regionleads;ALL.PP.HEAVYvsNEVER.MALE.locusleads;ALL.PP.HEAVYvsNEVER.MALE.regionleads;EUR.PP.HEAVYvsLIGHT.COMBINED.locusleads;EUR.PP.HEAVYvsLIGHT.MALE.locusleads;EUR.PP.HEAVYvsLIGHT.MALE.regionleads;EUR.PP.HEAVYvsNEVER.COMBINED.loc…
rs7862275	9:110378678:C_T	SVEP1	known	0	9	110378678	t	c	0.0484	0.2941	0.1131	0.00931277	0.2758	0.1444	0.0561368	-0.01275	46.623	7.515e-11	6.03966e-08	900357	634882	+-?+++	+-?++-	8	0.4202	ALL.SBP.CURDRINK.COMBINED.locusleads	278.4	ALL.SBP.CURDRINK.COMBINED.locusleads;ALL.SBP.HEAVYvsLIGHT.COMBINED.locusleads
rs1647570	11:65800785:A_T	OVOL1	known	3566	11	65800785	a	t	0.6989	0.05774	0.03104	0.06286	0.07366	0.03858	0.0562261	-0.0009607	35.94	1.569e-08	7.76554e-06	1008420	656546	+?-++-	+?++++	8	0.4684	ALL.DBP.CURDRINK.COMBINED.locusleads	114.6	ALL.DBP.CURDRINK.COMBINED.locusleads
rs74938797	2:55962365:C_T	MIR217	known	-20601	2	55962365	t	c	0.5867	-0.1647	0.02763	2.50834e-09	-0.0992	0.05196	0.0562413	-0.0007622	71.359	3.196e-16	6.72882e-13	690230	200326	-----	+---+	8	0.7801	ALL.PP.HEAVYvsLIGHT.COMBINED.locusleads	208.1	ALL.PP.CURDRINK.COMBINED.locusleads;ALL.PP.CURDRINK.COMBINED.regionleads;ALL.PP.CURDRINK.FEMALE.locusleads;ALL.PP.CURDRINK.MALE.locusleads;ALL.PP.HEAVYvsLIGHT.COMBINED.locusleads;ALL.PP.HEAVYvsLIGHT.COMBINED.regionleads;ALL.PP.HEAVYvsLIGHT.FEMALE.locusleads;ALL.PP.HEAVYvsLIGHT.FEMALE.regionleads;ALL.PP.HEAVYvsLIGHT.MALE.locusleads;ALL.PP.HEAVYvsLIGHT.MALE.regionleads;ALL.PP.HEAVYvsNEVER.COMBINED.…
rs4246958	11:69444462:C_T	MYEOV	known	147175	11	69444462	t	c	0.4263	0.2358	0.05085	3.53215e-06	-0.1153	0.06047	0.0565555	-0.002582	34.914	2.622e-08	1.19145e-05	1141790	764504	+-++++	+++-+-	10	0.1778	ALL.SBP.CURDRINK.COMBINED.locusleads	288.5	ALL.SBP.CURDRINK.COMBINED.locusleads
rs75900458	4:80230788:G_T	PRDM8	known	26460	4	80230788	t	g	0.0647	0.3041	0.05246	6.75932e-09	-0.1519	0.07992	0.0573478	-0.00274	39.831	2.243e-09	1.38704e-06	937984	617100	-++--+	++-++-	10	0.01007	ALL.DBP.CURDRINK.COMBINED.locusleads	2.8	ALL.DBP.CURDRINK.COMBINED.locusleads;ALL.SBP.CURDRINK.COMBINED.locusleads
rs10096038	8:140084981:C_T	TRAPPC9	known	0	8	140084981	t	c	0.711	-0.07684	0.03365	0.0224005	-0.0781	0.04121	0.0580697	-0.001131	47.402	5.09e-11	4.70694e-08	1146110	764930	-+---+	+-+-+-	10	0.09366	ALL.PP.CURDRINK.COMBINED.locusleads	142.2	ALL.PP.CURDRINK.COMBINED.locusleads;ALL.PP.HEAVYvsLIGHT.COMBINED.locusleads;ALL.PP.HEAVYvsLIGHT.MALE.locusleads;ALL.SBP.CURDRINK.COMBINED.locusleads;ALL.SBP.CURDRINK.MALE.locusleads;ALL.SBP.HEAVYvsLIGHT.COMBINED.locusleads;ALL.SBP.HEAVYvsLIGHT.COMBINED.regionleads;ALL.SBP.HEAVYvsLIGHT.MALE.locusleads;ALL.SBP.HEAVYvsLIGHT.MALE.regionleads
rs6674593	1:232434684:A_C	SIPA1L2	known	0	1	232434684	a	c	0.2783	0.2387	0.04825	7.53078e-07	-0.1131	0.0599	0.0590062	-0.002324	36.833	1.004e-08	5.07784e-06	1147210	765143	++++++	-----+	10	0.8242	ALL.SBP.CURDRINK.COMBINED.locusleads	623.1	ALL.SBP.CURDRINK.COMBINED.locusleads;ALL.SBP.CURDRINK.COMBINED.regionleads
rs12540769	7:12744757:A_C	ARL4A	novel-T3	53824	7	12744757	a	c	0.2729	0.1671	0.03941	2.23479e-05	0.1505	0.07971	0.0590133	-0.001552	38.946	3.492e-09	1.7472e-06	750328	208435	-++-+	-+++-	8	0.7686	ALL.SBP.HEAVYvsLIGHT.COMBINED.locusleads	568.1	ALL.SBP.CURDRINK.COMBINED.locusleads;ALL.SBP.CURDRINK.COMBINED.regionleads;ALL.SBP.HEAVYvsLIGHT.COMBINED.locusleads;ALL.SBP.HEAVYvsLIGHT.COMBINED.regionleads;EUR.SBP.HEAVYvsLIGHT.COMBINED.locusleads;EUR.SBP.HEAVYvsLIGHT.COMBINED.regionleads
rs2724378	1:207875000:A_C	CD34	known	-11537	1	207875000	a	c	0.7275	-0.199	0.04233	2.58691e-06	0.09262	0.04914	0.0594543	-0.00179	40.083	1.977e-09	1.34655e-06	1064990	739107	--+---	+--+++	10	0.3014	ALL.PP.CURDRINK.COMBINED.locusleads	147.5	ALL.PP.CURDRINK.COMBINED.locusleads;EUR.PP.CURDRINK.COMBINED.locusleads
rs11045173	12:20320085:A_G	PDE3A	known	-49159	12	20320085	a	g	0.8226	0.06994	0.03804	0.0659754	0.08514	0.04529	0.0601237	-0.001446	43.126	4.318e-10	3.18986e-07	1086350	721879	--+++-	++-+-+	10	0.4433	ALL.DBP.CURDRINK.COMBINED.locusleads	35.13	ALL.DBP.CURDRINK.COMBINED.locusleads;ALL.DBP.HEAVYvsLIGHT.COMBINED.locusleads;EUR.DBP.CURDRINK.COMBINED.locusleads;EUR.DBP.HEAVYvsLIGHT.COMBINED.locusleads
rs4668424	2:163598094:C_T	FIGN	known	-9513	2	163598094	t	c	0.1756	0.3837	0.05744	2.3892e-11	-0.1398	0.07449	0.0605507	-0.003297	70.911	3.998e-16	7.98799e-13	1145010	763538	++++++	-----+	10	0.9193	ALL.SBP.CURDRINK.COMBINED.locusleads	18.4	ALL.DBP.CURDRINK.COMBINED.locusleads;ALL.DBP.CURDRINK.FEMALE.locusleads;ALL.DBP.HEAVYvsLIGHT.COMBINED.locusleads;ALL.DBP.LIGHTvsNEVER.COMBINED.locusleads;ALL.DBP.LIGHTvsNEVER.FEMALE.locusleads;ALL.SBP.CURDRINK.COMBINED.locusleads;ALL.SBP.CURDRINK.FEMALE.locusleads;ALL.SBP.HEAVYvsLIGHT.COMBINED.locusleads;ALL.SBP.HEAVYvsLIGHT.FEMALE.locusleads;ALL.SBP.LIGHTvsNEVER.COMBINED.locusleads;ALL.SBP.LIGHT…
rs4601133	6:97905873:G_T	MIR2113	known	-118657	6	97905873	t	g	0.1141	0.4632	0.1169	7.42122e-05	-0.2352	0.1254	0.0607105	-0.01367	41.046	1.267e-08	1.94983e-05	370662	322096	??-++???+??+-++++++++??+??+++-	??+-+???-??-+--------??-??-+-+	36	0.5257	EUR.DBP.LIGHTvsNEVER.COMBINED.locusleads	477.3	ALL.SBP.CURDRINK.COMBINED.locusleads;EUR.DBP.LIGHTvsNEVER.COMBINED.locusleads;EUR.DBP.LIGHTvsNEVER.COMBINED.regionleads
rs6032948	20:10778727:C_T	LOC101929395	known	24700	20	10778727	t	c	0.282	0.07147	0.03056	0.0193521	0.0692	0.03697	0.0612359	-0.0009331	50.986	8.484e-12	8.81203e-09	1145970	765918	++++++	++-+--	10	0.04941	ALL.DBP.CURDRINK.COMBINED.locusleads	20.17	ALL.DBP.CURDRINK.COMBINED.locusleads;ALL.DBP.CURDRINK.MALE.locusleads;ALL.DBP.HEAVYvsLIGHT.COMBINED.locusleads;ALL.DBP.HEAVYvsLIGHT.MALE.locusleads;ALL.DBP.LIGHTvsNEVER.COMBINED.locusleads
rs62056195	16:71515582:A_G	CHST4	known	-10537	16	71515582	a	g	0.8996	-0.1187	0.06861	0.083618	-0.1476	0.0789	0.0613836	-0.004706	49.579	1.714e-11	1.73839e-08	899719	647294	--?-++	-+?---	8	0.2777	ALL.PP.CURDRINK.COMBINED.locusleads	22.7	ALL.PP.CURDRINK.COMBINED.locusleads;ALL.PP.HEAVYvsLIGHT.COMBINED.locusleads;ALL.PP.HEAVYvsLIGHT.MALE.locusleads;ALL.PP.LIGHTvsNEVER.COMBINED.locusleads;EUR.PP.LIGHTvsNEVER.COMBINED.locusleads
rs7912283	10:131959515:A_G	PPP2R2D	known	0	10	131959515	a	g	0.6657	-0.1642	0.02812	5.24331e-09	0.1001	0.05352	0.0614382	-0.0007901	36.053	1.483e-08	6.87188e-06	661870	194637	-----	+++++	8	0.6417	ALL.PP.HEAVYvsLIGHT.COMBINED.locusleads	648.1	ALL.PP.CURDRINK.COMBINED.locusleads;ALL.PP.CURDRINK.COMBINED.regionleads;ALL.PP.HEAVYvsLIGHT.COMBINED.locusleads;ALL.PP.HEAVYvsLIGHT.COMBINED.regionleads
rs151165225	19:45257662:C_T	MARK4	known	0	19	45257662	t	c	0.247	0.1645	0.02796	4.01911e-09	0.1013	0.05423	0.0617663	-0.0007815	67.263	2.477e-15	5.18447e-12	589402	169290	+?+++	+?+-+	6	0.6616	ALL.DBP.HEAVYvsLIGHT.COMBINED.locusleads	126.2	ALL.DBP.CURDRINK.COMBINED.locusleads;ALL.DBP.CURDRINK.COMBINED.regionleads;ALL.DBP.CURDRINK.MALE.locusleads;ALL.DBP.CURDRINK.MALE.regionleads;ALL.DBP.HEAVYvsLIGHT.COMBINED.locusleads;ALL.DBP.HEAVYvsLIGHT.COMBINED.regionleads;ALL.DBP.HEAVYvsLIGHT.MALE.locusleads;ALL.DBP.HEAVYvsLIGHT.MALE.regionleads;ALL.DBP.HEAVYvsNEVER.COMBINED.locusleads;ALL.DBP.HEAVYvsNEVER.COMBINED.regionleads;ALL.DBP.HEAVYvsN…
rs1571920	10:62931039:A_T	EGR2	known	111872	10	62931039	a	t	0.695	-0.09913	0.02705	0.000247633	-0.09205	0.0495	0.0629427	-0.0007297	34.583	3.093e-08	1.19417e-05	653867	198028	-----	+----	8	0.9753	ALL.DBP.HEAVYvsLIGHT.COMBINED.locusleads	134.5	ALL.DBP.HEAVYvsLIGHT.COMBINED.locusleads
rs11770622	7:46157668:C_T	IGFBP3	known	236396	7	46157668	t	c	0.164	0.1535	0.03484	1.05367e-05	0.1277	0.06876	0.0632849	-0.001213	41.89	1.185e-08	7.82038e-06	630950	175902	-++-+---+++-++?-+++++-?+--+?-+++--++++--+--+-+-??+-++++++-	+--+++++---+--?+++---+?+++-?+-+--+-+-+-+++--+++??-+++++---	104	0.6913	EUR.PP.HEAVYvsLIGHT.COMBINED.locusleads	5.11	EUR.PP.HEAVYvsLIGHT.COMBINED.locusleads
rs2782980	10:114021768:C_T	ADRB1	known	-22278	10	114021768	t	c	0.2762	-0.169	0.03034	2.54441e-08	-0.06822	0.03676	0.063479	-0.00092	161.079	1.052e-35	1.34308e-31	1150140	767950	------	+-+---	10	0.47	ALL.DBP.CURDRINK.COMBINED.locusleads	56.1	ALL.DBP.CURDRINK.COMBINED.locusleads;ALL.DBP.CURDRINK.COMBINED.regionleads;ALL.DBP.CURDRINK.FEMALE.locusleads;ALL.DBP.CURDRINK.FEMALE.regionleads;ALL.DBP.CURDRINK.MALE.locusleads;ALL.DBP.CURDRINK.MALE.regionleads;ALL.DBP.HEAVYvsLIGHT.COMBINED.locusleads;ALL.DBP.HEAVYvsLIGHT.COMBINED.regionleads;ALL.DBP.HEAVYvsLIGHT.FEMALE.locusleads;ALL.DBP.HEAVYvsLIGHT.MALE.locusleads;ALL.DBP.HEAVYvsLIGHT.MALE.r…
rs12612084	2:143420831:C_T	ARHGAP15	known	0	2	143420831	t	c	0.5437	0.151	0.03193	2.25523e-06	-0.07223	0.03895	0.0636778	-0.001019	34.744	2.854e-08	1.45896e-05	1147190	765134	++++++	----+-	10	0.3309	ALL.PP.CURDRINK.COMBINED.locusleads	704.1	ALL.PP.CURDRINK.COMBINED.locusleads;ALL.PP.CURDRINK.COMBINED.regionleads
rs7315519	12:112755122:A_G	RPH3A	known	-36621	12	112755122	a	g	0.4117	0.07932	0.02745	0.00385711	0.06175	0.03333	0.0639275	-0.0007527	63.743	1.44e-14	2.53717e-11	1151030	768139	++++++	+-++-+	10	0.6422	ALL.DBP.CURDRINK.COMBINED.locusleads	13.4	ALL.DBP.CURDRINK.COMBINED.locusleads;ALL.DBP.CURDRINK.FEMALE.locusleads;ALL.DBP.CURDRINK.MALE.locusleads;ALL.DBP.HEAVYvsLIGHT.COMBINED.locusleads;ALL.DBP.HEAVYvsLIGHT.MALE.locusleads;ALL.DBP.HEAVYvsNEVER.COMBINED.locusleads;ALL.SBP.CURDRINK.COMBINED.locusleads;ALL.SBP.HEAVYvsLIGHT.COMBINED.locusleads;ALL.SBP.HEAVYvsNEVER.COMBINED.locusleads;EUR.DBP.CURDRINK.COMBINED.locusleads;EUR.DBP.HEAVYvsLIGH…
rs17722209	5:149026823:C_T	SH3TC2	known	0	5	149026823	t	c	0.8072	0.1439	0.03311	1.38567e-05	0.07521	0.0406	0.0639594	-0.001095	105.591	1.178e-23	6.79772e-20	1140480	761079	++++-+	--+++-	10	0.1759	ALL.DBP.CURDRINK.COMBINED.locusleads	113.1	ALL.DBP.CURDRINK.COMBINED.locusleads;ALL.DBP.CURDRINK.COMBINED.regionleads;ALL.DBP.CURDRINK.FEMALE.locusleads;ALL.DBP.CURDRINK.FEMALE.regionleads;ALL.DBP.CURDRINK.MALE.locusleads;ALL.DBP.CURDRINK.MALE.regionleads;ALL.DBP.HEAVYvsLIGHT.COMBINED.locusleads;ALL.DBP.HEAVYvsLIGHT.COMBINED.regionleads;ALL.DBP.HEAVYvsLIGHT.FEMALE.locusleads;ALL.DBP.HEAVYvsLIGHT.FEMALE.regionleads;ALL.DBP.HEAVYvsLIGHT.MAL…
rs7989823	13:110307296:A_C	COL4A2	known	0	13	110307296	a	c	0.4262	-0.1388	0.03496	7.17967e-05	-0.1179	0.06384	0.0647755	-0.001222	38.832	2.039e-08	3.33079e-05	328587	99505	-+----?++??----+-?----++++-++??--+----??+?????-+-	--+--+?--??++++--?++++-+---++??+--+-+-??-?????-+-	70	0.8076	EUR.DBP.HEAVYvsLIGHT.MALE.locusleads	564.3	EUR.DBP.HEAVYvsLIGHT.MALE.locusleads;EUR.DBP.HEAVYvsLIGHT.MALE.regionleads
rs7164068	15:101179175:C_G	CHSY1	known	0	15	101179175	c	g	0.1307	-0.06973	0.03829	0.0685913	-0.08794	0.04765	0.064959	-0.001465	34.116	3.907e-08	1.72333e-05	1142410	762507	-----+	-+--+-	10	0.9986	ALL.DBP.CURDRINK.COMBINED.locusleads	722.1	ALL.DBP.CURDRINK.COMBINED.locusleads;ALL.DBP.CURDRINK.COMBINED.regionleads
rs16916781	10:61835267:C_T	ARID5B	known	-65986	10	61835267	t	c	0.9528	0.3431	0.08834	0.000102812	0.3285	0.1784	0.0655677	-0.007801	33.851	4.46e-08	1.6846e-05	658467	179344	+?++?	-?+-?	4	0.8133	ALL.SBP.HEAVYvsLIGHT.COMBINED.locusleads	40.6	ALL.DBP.CURDRINK.COMBINED.locusleads;ALL.SBP.HEAVYvsLIGHT.COMBINED.locusleads
rs10535629	11:17353713:G_GGCA	NCR3LG1	known	0	11	17353713	g	ggca	0.6404	-0.1319	0.03396	0.00010276	-0.07824	0.04252	0.0657572	-0.001152	82.092	1.493e-18	4.07473e-15	991879	650041	-?---+	-?----	8	0.4886	ALL.PP.CURDRINK.COMBINED.locusleads	71.2	ALL.PP.CURDRINK.COMBINED.locusleads;ALL.PP.CURDRINK.COMBINED.regionleads;ALL.PP.CURDRINK.FEMALE.locusleads;ALL.PP.CURDRINK.FEMALE.regionleads;ALL.PP.CURDRINK.MALE.locusleads;ALL.PP.CURDRINK.MALE.regionleads;ALL.PP.HEAVYvsLIGHT.COMBINED.locusleads;ALL.PP.HEAVYvsLIGHT.COMBINED.regionleads;ALL.PP.HEAVYvsLIGHT.FEMALE.locusleads;ALL.PP.HEAVYvsLIGHT.FEMALE.regionleads;ALL.PP.HEAVYvsLIGHT.MALE.locuslead…
rs56340611	15:90864388:C_T	FURIN	known	-4203	15	90864388	t	c	0.9438	0.2143	0.05088	2.53264e-05	0.1874	0.102	0.0661723	-0.002588	38.391	4.609e-09	2.24967e-06	643446	176640	+?+++	+?++-	6	0.9959	ALL.DBP.HEAVYvsLIGHT.COMBINED.locusleads	12.7	ALL.DBP.CURDRINK.COMBINED.locusleads;ALL.DBP.HEAVYvsLIGHT.COMBINED.locusleads;ALL.SBP.HEAVYvsLIGHT.COMBINED.locusleads;EUR.DBP.HEAVYvsLIGHT.COMBINED.locusleads
rs9315829	13:41292803:G_T	NAA16	known	-18401	13	41292803	t	g	0.1934	-0.2385	0.04592	2.06028e-07	-0.1676	0.09127	0.0663118	-0.002103	53.365	2.582e-12	2.54678e-09	748386	207911	+---+	---+-	8	0.2334	ALL.SBP.HEAVYvsLIGHT.COMBINED.regionleads	343.1	ALL.PP.CURDRINK.COMBINED.locusleads;ALL.PP.HEAVYvsLIGHT.COMBINED.locusleads;ALL.SBP.CURDRINK.COMBINED.locusleads;ALL.SBP.CURDRINK.COMBINED.regionleads;ALL.SBP.CURDRINK.MALE.locusleads;ALL.SBP.CURDRINK.MALE.regionleads;ALL.SBP.HEAVYvsLIGHT.COMBINED.locusleads;ALL.SBP.HEAVYvsLIGHT.COMBINED.regionleads;ALL.SBP.HEAVYvsLIGHT.MALE.locusleads;ALL.SBP.HEAVYvsLIGHT.MALE.regionleads;EUR.SBP.CURDRINK.COMBIN…
rs12789028	11:65558683:A_G	LTBP3	known	455	11	65558683	a	g	0.188	0.1381	0.03317	3.13542e-05	0.1191	0.06488	0.0664025	-0.001099	38.577	4.962e-08	2.77649e-05	630674	175557	+-++-+?++++-+-?+-++++--+++-+-+--++-++++++--+++-??-+-++++++	-++-+-?++--+-+?+--+-+-+--++-+-++---+-----++-++-??+-++-+--+	106	0.7719	EUR.PP.HEAVYvsLIGHT.COMBINED.locusleads	114.7	EUR.PP.HEAVYvsLIGHT.COMBINED.locusleads;EUR.PP.HEAVYvsLIGHT.COMBINED.regionleads
rs4978815	9:109496714:G_T	PTPN3	known	0	9	109496714	t	g	0.1427	-0.2028	0.03949	2.81429e-07	0.08707	0.04744	0.0664507	-0.001558	45.648	1.224e-10	1.01342e-07	1142320	763604	-+----	+--+--	10	0.5795	ALL.DBP.CURDRINK.COMBINED.locusleads	436.1	ALL.DBP.CURDRINK.COMBINED.locusleads
rs6820615	4:168811451:A_C	PALLD	known	0	4	168811451	a	c	0.4326	0.1201	0.0253	2.0642e-06	0.09179	0.05006	0.0667134	-0.0006388	46.462	8.146e-11	6.72663e-08	750163	208338	++++-	-++++	8	0.755	ALL.PP.HEAVYvsLIGHT.COMBINED.locusleads	81.2	ALL.PP.CURDRINK.COMBINED.locusleads;ALL.PP.HEAVYvsLIGHT.COMBINED.locusleads
rs113543611	1:150603278:C_T	ENSA	known	-18844	1	150603278	t	c	0.0368	-0.508	0.1076	2.34469e-06	0.2284	0.1248	0.0672308	-0.01156	41.632	9.116e-10	6.64098e-07	904707	657251	-??--+	-??++-	6	0.3532	ALL.PP.CURDRINK.COMBINED.locusleads	229.3	ALL.PP.CURDRINK.COMBINED.locusleads;EUR.PP.CURDRINK.COMBINED.locusleads
rs3781761	11:130422950:A_G	ADAMTS8	known	0	11	130422950	a	g	0.2499	0.2053	0.03582	9.95845e-09	0.0798	0.04364	0.0674599	-0.001282	163.121	3.791e-36	4.23093e-32	1145530	764731	-+++++	++-+-+	10	0.006981	ALL.PP.CURDRINK.COMBINED.locusleads	4.3	ALL.PP.CURDRINK.COMBINED.locusleads;ALL.PP.CURDRINK.FEMALE.locusleads;ALL.PP.CURDRINK.MALE.locusleads;ALL.PP.HEAVYvsLIGHT.COMBINED.locusleads;ALL.PP.HEAVYvsLIGHT.FEMALE.locusleads;ALL.PP.HEAVYvsLIGHT.MALE.locusleads;ALL.PP.HEAVYvsNEVER.COMBINED.locusleads;ALL.PP.HEAVYvsNEVER.FEMALE.locusleads;ALL.PP.HEAVYvsNEVER.MALE.locusleads;ALL.PP.LIGHTvsNEVER.COMBINED.locusleads;ALL.PP.LIGHTvsNEVER.FEMALE.lo…
rs2048072	4:101186913:A_T	PPP3CA	known	0	4	101186913	a	t	0.4301	-0.05814	0.02697	0.0311049	-0.06021	0.03296	0.0677359	-0.0007263	43.355	3.852e-10	2.87845e-07	1148390	766176	+-----	-++--+	10	0.1	ALL.DBP.CURDRINK.COMBINED.locusleads	243.2	ALL.DBP.CURDRINK.COMBINED.locusleads;ALL.DBP.HEAVYvsLIGHT.COMBINED.locusleads
rs11039216	11:47385041:C_T	SPI1	known	6465	11	47385041	t	c	0.4712	0.2159	0.04574	2.35662e-06	0.1014	0.05553	0.0678442	-0.002088	122.732	2.234e-27	1.76596e-23	1148410	766187	+-++++	-+++-+	10	0.004154	ALL.SBP.CURDRINK.COMBINED.locusleads	67.2	ALL.DBP.CURDRINK.COMBINED.locusleads;ALL.DBP.CURDRINK.FEMALE.locusleads;ALL.DBP.CURDRINK.MALE.locusleads;ALL.DBP.HEAVYvsLIGHT.COMBINED.locusleads;ALL.DBP.HEAVYvsLIGHT.FEMALE.locusleads;ALL.DBP.HEAVYvsLIGHT.FEMALE.regionleads;ALL.DBP.LIGHTvsNEVER.COMBINED.locusleads;ALL.PP.CURDRINK.COMBINED.locusleads;ALL.PP.CURDRINK.FEMALE.locusleads;ALL.PP.CURDRINK.MALE.locusleads;ALL.PP.HEAVYvsLIGHT.COMBINED.lo…
rs146345612	5:32881943:C_T	LOC340113	known	-65499	5	32881943	t	c	0.9741	0.4488	0.1901	0.0182325	0.3977	0.2184	0.0686113	-0.03612	67.404	2.309e-15	4.0478e-12	883467	649179	++?+-+	+-?+++	8	0.1638	ALL.SBP.CURDRINK.COMBINED.locusleads	7.7	ALL.DBP.CURDRINK.COMBINED.locusleads;ALL.DBP.HEAVYvsLIGHT.COMBINED.locusleads;ALL.PP.CURDRINK.COMBINED.locusleads;ALL.PP.HEAVYvsLIGHT.COMBINED.locusleads;ALL.SBP.CURDRINK.COMBINED.locusleads;ALL.SBP.HEAVYvsLIGHT.COMBINED.locusleads;ALL.SBP.HEAVYvsLIGHT.MALE.locusleads;ALL.SBP.LIGHTvsNEVER.COMBINED.locusleads;EUR.DBP.CURDRINK.COMBINED.locusleads;EUR.DBP.HEAVYvsLIGHT.COMBINED.locusleads;EUR.PP.CURD…
rs10414043	19:44912456:A_G	APOC1	known	-2207	19	44912456	a	g	0.1173	-0.2077	0.04255	1.0538e-06	0.09405	0.05171	0.0689424	-0.001808	38.699	3.95e-09	2.28882e-06	1138580	762122	-?----	+?-+-+	8	0.7592	ALL.DBP.CURDRINK.COMBINED.locusleads	126.3	ALL.DBP.CURDRINK.COMBINED.locusleads
rs1050288	12:27802363:C_T	KLHL42	known	0	12	27802363	t	c	0.3799	0.1636	0.03202	3.23343e-07	-0.07148	0.03941	0.0697158	-0.001024	42.052	7.388e-10	5.47727e-07	1148260	766105	++++++	------	10	0.4294	ALL.PP.CURDRINK.COMBINED.regionleads	500.1	ALL.PP.CURDRINK.COMBINED.locusleads;ALL.PP.CURDRINK.COMBINED.regionleads;EUR.PP.CURDRINK.COMBINED.locusleads;EUR.PP.CURDRINK.COMBINED.regionleads
rs188315257	2:25018517:G_T	DNAJC27-AS1	known	0	2	25018517	t	g	0.911	0.3337	0.06524	3.13807e-07	0.2403	0.1328	0.0703752	-0.004253	50.739	9.597e-12	8.41066e-09	655100	178945	+?+++	-?+-+	6	0.9872	ALL.SBP.HEAVYvsLIGHT.COMBINED.regionleads	375.1	ALL.DBP.CURDRINK.COMBINED.locusleads;ALL.DBP.CURDRINK.COMBINED.regionleads;ALL.SBP.CURDRINK.COMBINED.locusleads;ALL.SBP.CURDRINK.COMBINED.regionleads;ALL.SBP.HEAVYvsLIGHT.COMBINED.locusleads;ALL.SBP.HEAVYvsLIGHT.COMBINED.regionleads;EUR.SBP.CURDRINK.COMBINED.locusleads;EUR.SBP.CURDRINK.COMBINED.regionleads;EUR.SBP.HEAVYvsLIGHT.COMBINED.locusleads;EUR.SBP.HEAVYvsLIGHT.COMBINED.regionleads
rs7633280	3:168863703:A_G	EGFEM1P	known	33117	3	168863703	a	g	0.6154	-0.158	0.03663	1.6076e-05	-0.1326	0.07329	0.070412	-0.00134	39.523	2.616e-09	1.34074e-06	751072	208553	+----	---+-	8	0.3459	ALL.SBP.HEAVYvsLIGHT.COMBINED.locusleads	61.9	ALL.DBP.CURDRINK.COMBINED.locusleads;ALL.SBP.CURDRINK.COMBINED.locusleads;ALL.SBP.HEAVYvsLIGHT.COMBINED.locusleads;ALL.SBP.LIGHTvsNEVER.COMBINED.locusleads
rs58693787	18:50615340:A_G	MAPK4	known	0	18	50615340	a	g	0.7229	0.06203	0.02922	0.0337655	0.06526	0.03608	0.0704886	-0.0008537	40.684	1.464e-09	9.52787e-07	1147570	766092	++++-+	+-++-+	10	0.6054	ALL.DBP.CURDRINK.COMBINED.locusleads	215.3	ALL.DBP.CURDRINK.COMBINED.locusleads;ALL.DBP.HEAVYvsLIGHT.COMBINED.locusleads;ALL.SBP.CURDRINK.COMBINED.locusleads;ALL.SBP.HEAVYvsLIGHT.COMBINED.locusleads;EUR.SBP.CURDRINK.COMBINED.locusleads;EUR.SBP.CURDRINK.COMBINED.regionleads
rs56250922	6:143270821:A_G	AIG1	known	0	6	143270821	a	g	0.8815	0.2388	0.03762	2.18576e-10	-0.1323	0.07355	0.0720541	-0.001414	43.098	4.378e-10	3.01888e-07	743786	207426	+++++	----+	8	0.536	ALL.PP.HEAVYvsLIGHT.COMBINED.locusleads	201.5	ALL.PP.CURDRINK.COMBINED.locusleads;ALL.PP.HEAVYvsLIGHT.COMBINED.locusleads
rs848309	1:15981952:C_T	ZBTB17	known	5820	1	15981952	t	c	0.4125	-0.0744	0.02692	0.00571423	-0.05899	0.03282	0.0722754	-0.0007237	57.773	2.849e-13	4.00114e-10	1145290	764697	-+----	--+---	10	0.4724	ALL.DBP.CURDRINK.COMBINED.locusleads	302.1	ALL.DBP.CURDRINK.COMBINED.locusleads;ALL.DBP.CURDRINK.COMBINED.regionleads;ALL.DBP.HEAVYvsLIGHT.COMBINED.locusleads;ALL.DBP.HEAVYvsLIGHT.COMBINED.regionleads;ALL.DBP.HEAVYvsLIGHT.FEMALE.locusleads;ALL.DBP.HEAVYvsLIGHT.FEMALE.regionleads;ALL.DBP.LIGHTvsNEVER.COMBINED.locusleads;ALL.DBP.LIGHTvsNEVER.COMBINED.regionleads;ALL.SBP.CURDRINK.COMBINED.locusleads;ALL.SBP.HEAVYvsLIGHT.COMBINED.locusleads;A…
rs11771468	7:80764725:A_G	SEMA3C	known	0	7	80764725	a	g	0.1507	-0.1123	0.03696	0.00237822	-0.08104	0.04516	0.0727321	-0.001365	64.575	9.499e-15	1.72809e-11	1144730	764599	------	-+--++	10	0.5942	ALL.DBP.CURDRINK.COMBINED.locusleads	252.1	ALL.DBP.CURDRINK.COMBINED.locusleads;ALL.DBP.CURDRINK.COMBINED.regionleads;ALL.DBP.CURDRINK.MALE.locusleads;ALL.DBP.CURDRINK.MALE.regionleads;ALL.DBP.HEAVYvsLIGHT.COMBINED.locusleads;ALL.DBP.HEAVYvsLIGHT.COMBINED.regionleads;ALL.DBP.HEAVYvsLIGHT.MALE.locusleads;ALL.DBP.LIGHTvsNEVER.COMBINED.locusleads;ALL.DBP.LIGHTvsNEVER.COMBINED.regionleads;EUR.DBP.CURDRINK.COMBINED.locusleads;EUR.DBP.CURDRINK.…
rs17109875	10:94266818:C_T	PLCE1	known	0	10	94266818	t	c	0.8816	0.2691	0.06659	5.31903e-05	0.1485	0.08281	0.0729311	-0.00443	87.954	7.962e-20	2.48074e-16	1134320	757566	++++-+	---+++	10	0.6025	ALL.SBP.CURDRINK.COMBINED.locusleads	46.3	ALL.DBP.CURDRINK.COMBINED.locusleads;ALL.PP.CURDRINK.COMBINED.locusleads;ALL.PP.CURDRINK.MALE.locusleads;ALL.PP.HEAVYvsLIGHT.COMBINED.locusleads;ALL.PP.HEAVYvsLIGHT.COMBINED.regionleads;ALL.PP.HEAVYvsLIGHT.FEMALE.locusleads;ALL.SBP.CURDRINK.COMBINED.locusleads;ALL.SBP.CURDRINK.FEMALE.locusleads;ALL.SBP.CURDRINK.MALE.locusleads;ALL.SBP.HEAVYvsLIGHT.COMBINED.locusleads;ALL.SBP.HEAVYvsLIGHT.FEMALE.l…
rs3039821	1:176843956:T_TTTG	PAPPA2	known	1122	1	176843956	t	tttg	0.2382	0.12	0.02836	2.32332e-05	0.09474	0.05288	0.0731965	-0.0008038	41.013	1.242e-09	7.17008e-07	683343	198365	+++++	+-++-	8	0.9187	ALL.DBP.HEAVYvsLIGHT.COMBINED.regionleads	411.2	ALL.DBP.HEAVYvsLIGHT.COMBINED.locusleads;ALL.DBP.HEAVYvsLIGHT.COMBINED.regionleads;EUR.DBP.HEAVYvsLIGHT.COMBINED.locusleads;EUR.DBP.HEAVYvsLIGHT.COMBINED.regionleads
rs10020750	4:145769735:A_G	ZNF827	known	0	4	145769735	a	g	0.5221	-0.1268	0.02505	4.1515e-07	-0.08862	0.04949	0.0733471	-0.0006264	50.993	8.452e-12	8.68328e-09	753955	209141	----+	---+-	8	0.9186	ALL.PP.HEAVYvsLIGHT.COMBINED.locusleads	371.1	ALL.PP.CURDRINK.COMBINED.locusleads;ALL.PP.CURDRINK.COMBINED.regionleads;ALL.PP.HEAVYvsLIGHT.COMBINED.locusleads;ALL.PP.HEAVYvsLIGHT.COMBINED.regionleads;ALL.PP.HEAVYvsLIGHT.MALE.locusleads;ALL.PP.HEAVYvsLIGHT.MALE.regionleads;ALL.SBP.CURDRINK.COMBINED.locusleads;ALL.SBP.CURDRINK.COMBINED.regionleads;ALL.SBP.HEAVYvsLIGHT.COMBINED.locusleads;ALL.SBP.HEAVYvsLIGHT.COMBINED.regionleads;EUR.PP.CURDRIN…
rs10639151	7:90614442:G_GCT	CDK14	known	0	7	90614442	g	gct	0.3616	-0.07553	0.03328	0.023236	-0.07381	0.04122	0.0733518	-0.001107	42.689	5.372e-10	4.09159e-07	1051690	692900	-?+---	+?--++	8	0.1218	ALL.PP.CURDRINK.COMBINED.locusleads	417.3	ALL.PP.CURDRINK.COMBINED.locusleads;ALL.PP.CURDRINK.MALE.locusleads;ALL.PP.HEAVYvsLIGHT.COMBINED.locusleads;ALL.PP.HEAVYvsLIGHT.COMBINED.regionleads;EUR.PP.CURDRINK.COMBINED.locusleads;EUR.PP.HEAVYvsLIGHT.COMBINED.locusleads;EUR.PP.HEAVYvsLIGHT.COMBINED.regionleads
rs11964809	6:22403449:A_C	PRL	known	100596	6	22403449	a	c	0.4464	0.2466	0.0453	5.21826e-08	-0.09938	0.05569	0.074339	-0.002051	50.154	1.286e-11	1.18777e-08	1098060	724974	-+++++	++----	10	0.005245	ALL.SBP.CURDRINK.COMBINED.locusleads	322.2	ALL.PP.CURDRINK.COMBINED.locusleads;ALL.PP.CURDRINK.COMBINED.regionleads;ALL.PP.LIGHTvsNEVER.COMBINED.locusleads;ALL.PP.LIGHTvsNEVER.COMBINED.regionleads;ALL.SBP.CURDRINK.COMBINED.locusleads;ALL.SBP.CURDRINK.COMBINED.regionleads;ALL.SBP.LIGHTvsNEVER.COMBINED.locusleads;ALL.SBP.LIGHTvsNEVER.COMBINED.regionleads
rs6898766	5:33230929:C_T	TARS	known	-209766	5	33230929	t	c	0.7117	-0.1612	0.0395	4.48399e-05	-0.1433	0.08043	0.0748025	-0.001557	35.492	1.963e-08	8.21462e-06	724532	201228	---+-	-----	8	0.9281	ALL.SBP.HEAVYvsLIGHT.COMBINED.locusleads	7.14	ALL.SBP.HEAVYvsLIGHT.COMBINED.locusleads
rs10748799	10:100798737:C_T	PAX2	known	0	10	100798737	t	c	0.1959	-0.1288	0.02725	2.28304e-06	-0.09639	0.05415	0.0750669	-0.000742	45.485	1.328e-10	9.79203e-08	749131	208237	+----	-+-+-	8	0.005584	ALL.DBP.HEAVYvsLIGHT.COMBINED.locusleads	220.3	ALL.DBP.CURDRINK.COMBINED.locusleads;ALL.DBP.HEAVYvsLIGHT.COMBINED.locusleads;ALL.SBP.HEAVYvsLIGHT.COMBINED.locusleads
rs8105753	19:31436641:A_C	TSHZ3	known	87357	19	31436641	a	c	0.6417	0.09084	0.04625	0.0495176	0.1008	0.05663	0.07508	-0.002137	38.084	5.373e-09	2.89558e-06	1147210	765142	+-++--	-+-+++	10	0.6344	ALL.SBP.CURDRINK.COMBINED.locusleads	324.2	ALL.SBP.CURDRINK.COMBINED.locusleads
rs9865811	3:64008829:A_G	PSMD6-AS2	known	0	3	64008829	a	g	0.3489	-0.1568	0.03118	4.93392e-07	0.06892	0.03874	0.0752332	-0.0009717	39.827	2.248e-09	1.5128e-06	1147150	765114	----+-	++++-+	10	0.01773	ALL.PP.CURDRINK.COMBINED.regionleads	544.1	ALL.PP.CURDRINK.COMBINED.locusleads;ALL.PP.CURDRINK.COMBINED.regionleads;EUR.PP.CURDRINK.COMBINED.locusleads;EUR.PP.CURDRINK.COMBINED.regionleads
rs7844887	8:23544969:A_G	SLC25A37	known	0	8	23544969	a	g	0.2548	0.1094	0.02937	0.000195401	0.06498	0.03656	0.0755103	-0.0008616	77.63	1.39e-17	4.1411e-14	1147180	765131	++++++	++++++	10	0.942	ALL.DBP.CURDRINK.COMBINED.regionleads	182.1	ALL.DBP.CURDRINK.COMBINED.locusleads;ALL.DBP.CURDRINK.COMBINED.regionleads;ALL.DBP.CURDRINK.FEMALE.locusleads;ALL.DBP.CURDRINK.FEMALE.regionleads;ALL.DBP.CURDRINK.MALE.locusleads;ALL.DBP.CURDRINK.MALE.regionleads;ALL.DBP.HEAVYvsLIGHT.COMBINED.locusleads;ALL.DBP.HEAVYvsLIGHT.COMBINED.regionleads;ALL.DBP.HEAVYvsLIGHT.MALE.locusleads;ALL.DBP.HEAVYvsLIGHT.MALE.regionleads;ALL.DBP.LIGHTvsNEVER.COMBINE…
rs6516881	21:28935810:A_G	LTN1	known	0	21	28935810	a	g	0.2784	-0.1598	0.02835	1.73355e-08	0.09369	0.05289	0.0764922	-0.0008017	33.944	4.257e-08	1.57769e-05	690450	200526	+----	+++-+	8	0.1436	ALL.DBP.HEAVYvsLIGHT.COMBINED.locusleads	236.3	ALL.DBP.HEAVYvsLIGHT.COMBINED.locusleads;ALL.DBP.HEAVYvsLIGHT.COMBINED.regionleads
rs7726162	5:113049308:A_C	MCC	known	0	5	113049308	a	c	0.5013	0.07035	0.05341	0.187782	0.107	0.06047	0.0768151	-0.002852	40.753	1.553e-08	3.08644e-05	354725	274860	++-+-+--++------?+-+-+++-++-++++--+++-++++------+-??--+-+---+	--+++--++--+++++?-+-++------+-+-++-+-++-++++++++-+??++-++++++	114	0.9635	EUR.DBP.CURDRINK.FEMALE.locusleads	652.1	ALL.DBP.HEAVYvsLIGHT.FEMALE.locusleads;ALL.DBP.HEAVYvsLIGHT.FEMALE.regionleads;ALL.SBP.CURDRINK.COMBINED.locusleads;ALL.SBP.CURDRINK.COMBINED.regionleads;EUR.DBP.CURDRINK.FEMALE.locusleads;EUR.DBP.CURDRINK.FEMALE.regionleads;EUR.DBP.HEAVYvsLIGHT.FEMALE.locusleads;EUR.DBP.HEAVYvsLIGHT.FEMALE.regionleads
rs35290766	3:158229782:T_TC	RSRC1	known	0	3	158229782	t	tc	0.4014	0.0582	0.02805	0.0379989	0.06168	0.03487	0.076918	-0.0007861	37.656	6.654e-09	3.62096e-06	1051750	692930	+?++-+	+?++++	8	0.4959	ALL.DBP.CURDRINK.COMBINED.locusleads	248.3	ALL.DBP.CURDRINK.COMBINED.locusleads
rs6469999	8:121402967:A_G	HAS2	known	-210063	8	121402967	a	g	0.2801	-0.07681	0.03442	0.0256446	-0.07732	0.04379	0.0774462	-0.001182	37.115	8.722e-09	5.08232e-06	1146930	764933	-++---	----++	10	0.3488	ALL.PP.CURDRINK.COMBINED.locusleads	613.1	ALL.PP.CURDRINK.COMBINED.locusleads;ALL.PP.CURDRINK.COMBINED.regionleads
rs551674994	19:11077868:C_CT	LDLR	known	-11493	19	11077868	ct	c	0.8657	0.5163	0.1098	2.57391e-06	-0.2229	0.1263	0.0775897	-0.01205	44.22	2.499e-10	6.10455e-07	267513	201875	+??+++	-??--+	6	0.815	ALL.PP.CURDRINK.FEMALE.locusleads	11.7	ALL.PP.CURDRINK.COMBINED.locusleads;ALL.PP.CURDRINK.FEMALE.locusleads;EUR.PP.CURDRINK.FEMALE.locusleads
rs16891829	4:15379286:C_T	C1QTNF7	known	0	4	15379286	t	c	0.9309	-0.2638	0.05053	1.78286e-07	0.1197	0.06787	0.0777883	-0.002541	37.067	8.932e-09	5.19311e-06	1138330	760803	-+----	+-+++-	10	0.2977	ALL.PP.CURDRINK.COMBINED.locusleads	335.2	ALL.PP.CURDRINK.COMBINED.locusleads
rs55964935	2:19495608:C_T	OSR1	known	136997	2	19495608	t	c	0.4867	-0.1112	0.04195	0.00803074	-0.0841	0.0477	0.0778832	-0.001759	80.753	2.438e-15	5.08162e-12	840886	635865	---+-++-++++-+--++-+--++-+++++---+-++++-+-++---+--++??++--++-++	+-+-+--+----+-++--+-----------++--++---+-+--++--+-+-??--++--+--	120	0.02542	EUR.PP.CURDRINK.COMBINED.locusleads	54.3	ALL.PP.CURDRINK.COMBINED.locusleads;ALL.PP.HEAVYvsLIGHT.COMBINED.locusleads;EUR.PP.CURDRINK.COMBINED.locusleads;EUR.PP.CURDRINK.MALE.locusleads;EUR.PP.HEAVYvsLIGHT.COMBINED.locusleads;EUR.PP.HEAVYvsLIGHT.MALE.locusleads;EUR.PP.LIGHTvsNEVER.COMBINED.locusleads
rs4076050	11:10310023:C_T	CAND1.11	known	0	11	10310023	t	c	0.112	-0.09634	0.04006	0.0161772	-0.09046	0.05132	0.0779569	-0.001604	39.624	2.487e-09	1.52019e-06	1141800	761216	-+----	-+---+	10	0.4478	ALL.DBP.CURDRINK.COMBINED.locusleads	65.8	ALL.DBP.CURDRINK.COMBINED.locusleads
rs57683689	6:107013848:A_C	C6orf203	novel-T3	-14323	6	107013848	a	c	0.0921	-0.3668	0.07216	3.71229e-07	0.165	0.09373	0.0783442	-0.005205	37.181	8.438e-09	4.34911e-06	1132400	757159	+-----	-+++++	10	0.2142	ALL.SBP.CURDRINK.COMBINED.regionleads	610.1	ALL.SBP.CURDRINK.COMBINED.locusleads;ALL.SBP.CURDRINK.COMBINED.regionleads
rs769009	10:48182406:G_T	FRMPD2	novel-T3	0	10	48182406	t	g	0.5572	0.08697	0.04505	0.0535422	0.09727	0.05527	0.0784238	-0.002028	36.68	1.084e-08	5.43453e-06	1143500	762485	++++-+	-+-++-	10	0.06339	ALL.SBP.CURDRINK.COMBINED.regionleads	629.1	ALL.SBP.CURDRINK.COMBINED.locusleads;ALL.SBP.CURDRINK.COMBINED.regionleads
rs570357356	1:93313664:A_G	LOC100131564	known	0	1	93313664	a	g	0.9779	0.1982	0.1375	0.149456	0.2808	0.1596	0.0785098	-0.01888	36.76	1.042e-08	5.38436e-06	711129	516190	-??++-	-??+++	6	0.4359	ALL.DBP.CURDRINK.COMBINED.locusleads	627.1	ALL.DBP.CURDRINK.COMBINED.locusleads;ALL.DBP.CURDRINK.COMBINED.regionleads
rs4722530	7:25844482:G_T	MIR148A	known	-105436	7	25844482	t	g	0.2977	0.1907	0.03662	1.91364e-07	-0.07966	0.04529	0.0785967	-0.001339	44.315	2.383e-10	1.9493e-07	1151080	768161	+-++++	----+-	10	0.4355	ALL.PP.CURDRINK.COMBINED.regionleads	466.1	ALL.DBP.CURDRINK.COMBINED.locusleads;ALL.DBP.CURDRINK.COMBINED.regionleads;ALL.DBP.HEAVYvsLIGHT.COMBINED.locusleads;ALL.DBP.HEAVYvsLIGHT.COMBINED.regionleads;ALL.PP.CURDRINK.COMBINED.locusleads;ALL.PP.CURDRINK.COMBINED.regionleads;EUR.PP.CURDRINK.COMBINED.locusleads;EUR.PP.CURDRINK.COMBINED.regionleads
rs6963580	7:92448073:C_G	GATAD1	known	0	7	92448073	c	g	0.7883	0.08434	0.03578	0.0184142	0.07908	0.04501	0.0789275	-0.001279	41.294	1.079e-09	7.74061e-07	1146630	764805	+--+++	-++-++	10	4.054e-06	ALL.PP.CURDRINK.COMBINED.locusleads	38.6	ALL.PP.CURDRINK.COMBINED.locusleads
rs4553272	10:21549451:C_T	MLLT10	known	0	10	21549451	t	c	0.4798	0.1719	0.03671	2.83193e-06	0.1297	0.0741	0.0800601	-0.001346	43.828	8.814e-09	5.75446e-06	631968	176021	--+-+-++-+++-+?++++-+--+-+-+-++++++++-+++-++-++??++++-++++	+-+--+--+--+--?+-----+-++-+++++---+-+++-+------??++-++---+	108	0.8364	EUR.SBP.HEAVYvsLIGHT.COMBINED.regionleads	456.2	ALL.SBP.HEAVYvsLIGHT.COMBINED.locusleads;ALL.SBP.HEAVYvsLIGHT.COMBINED.regionleads;EUR.SBP.HEAVYvsLIGHT.COMBINED.locusleads;EUR.SBP.HEAVYvsLIGHT.COMBINED.regionleads
rs62053262	16:69935396:C_G	WWP2	known	0	16	69935396	c	g	0.9531	-0.6775	0.107	2.42356e-10	-0.211	0.1211	0.0814452	-0.01143	283.917	2.23e-62	8.1484e-58	881512	650007	+??-+-	-??--+	6	0.1599	ALL.PP.CURDRINK.COMBINED.regionleads	22.1	ALL.PP.CURDRINK.COMBINED.locusleads;ALL.PP.CURDRINK.COMBINED.regionleads;ALL.PP.CURDRINK.FEMALE.locusleads;ALL.PP.CURDRINK.FEMALE.regionleads;ALL.PP.CURDRINK.MALE.locusleads;ALL.PP.CURDRINK.MALE.regionleads;ALL.PP.HEAVYvsLIGHT.COMBINED.locusleads;ALL.PP.HEAVYvsLIGHT.COMBINED.regionleads;ALL.PP.HEAVYvsLIGHT.FEMALE.locusleads;ALL.PP.HEAVYvsLIGHT.FEMALE.regionleads;ALL.PP.HEAVYvsLIGHT.MALE.locuslead…
rs6599250	3:38742538:C_T	SCN10A	known	0	3	38742538	t	c	0.3458	0.07848	0.03479	0.0240819	0.07238	0.04157	0.0816556	-0.001209	48.776	2.561e-11	2.51791e-08	1138120	762007	++++++	---+++	10	0.3636	ALL.PP.CURDRINK.COMBINED.regionleads	400.1	ALL.PP.CURDRINK.COMBINED.locusleads;ALL.PP.CURDRINK.COMBINED.regionleads;ALL.PP.CURDRINK.MALE.locusleads;ALL.PP.CURDRINK.MALE.regionleads;ALL.PP.HEAVYvsLIGHT.COMBINED.locusleads;ALL.PP.HEAVYvsLIGHT.COMBINED.regionleads;EUR.PP.CURDRINK.COMBINED.locusleads;EUR.PP.CURDRINK.COMBINED.regionleads;EUR.PP.HEAVYvsLIGHT.COMBINED.locusleads;EUR.PP.HEAVYvsLIGHT.COMBINED.regionleads
rs6538183	12:89392406:A_G	POC1B	known	-27314	12	89392406	a	g	0.8859	-0.1559	0.03885	5.99849e-05	-0.1344	0.07734	0.0822494	-0.001507	34.894	2.648e-08	1.14936e-05	742473	206818	+---+	-+--+	8	0.2766	ALL.PP.HEAVYvsLIGHT.COMBINED.locusleads	3.16	ALL.PP.HEAVYvsLIGHT.COMBINED.locusleads
rs760523889	17:62559299:C_CAT	TLK2	known	0	17	62559299	cat	c	0.4065	0.2406	0.04934	1.08057e-06	-0.1019	0.05871	0.0826258	-0.002431	42.589	5.648e-10	9.4706e-07	599513	413918	+?+++-	-?---+	8	0.1343	ALL.PP.CURDRINK.MALE.locusleads	86.3	ALL.PP.CURDRINK.COMBINED.locusleads;ALL.PP.CURDRINK.MALE.locusleads;EUR.PP.CURDRINK.MALE.locusleads
rs73079350	3:41834818:C_T	ULK4	known	0	3	41834818	t	c	0.1352	-0.3718	0.05646	4.54295e-11	-0.1135	0.06542	0.0827508	-0.003186	257.932	9.792e-57	2.07742e-52	964532	686752	+-?---	--?-+-	8	0.102	ALL.PP.CURDRINK.COMBINED.locusleads	14.2	ALL.DBP.CURDRINK.COMBINED.locusleads;ALL.DBP.CURDRINK.FEMALE.locusleads;ALL.DBP.CURDRINK.MALE.locusleads;ALL.DBP.HEAVYvsLIGHT.COMBINED.locusleads;ALL.DBP.HEAVYvsLIGHT.FEMALE.locusleads;ALL.DBP.HEAVYvsNEVER.COMBINED.locusleads;ALL.DBP.HEAVYvsNEVER.FEMALE.locusleads;ALL.DBP.LIGHTvsNEVER.COMBINED.locusleads;ALL.DBP.LIGHTvsNEVER.FEMALE.locusleads;ALL.DBP.LIGHTvsNEVER.MALE.locusleads;ALL.PP.CURDRINK.C…
rs6031431	20:44166512:A_G	JPH2	known	0	20	44166512	a	g	0.5607	-0.3561	0.0447	1.63307e-15	0.09468	0.05462	0.0830191	-0.001996	132.377	1.797e-29	1.80902e-25	1148400	766189	-+----	--++++	10	0.8571	ALL.SBP.CURDRINK.COMBINED.regionleads	75.1	ALL.DBP.CURDRINK.COMBINED.locusleads;ALL.DBP.CURDRINK.COMBINED.regionleads;ALL.DBP.CURDRINK.MALE.locusleads;ALL.DBP.CURDRINK.MALE.regionleads;ALL.DBP.HEAVYvsLIGHT.COMBINED.locusleads;ALL.DBP.HEAVYvsLIGHT.COMBINED.regionleads;ALL.DBP.HEAVYvsLIGHT.MALE.locusleads;ALL.DBP.HEAVYvsLIGHT.MALE.regionleads;ALL.DBP.HEAVYvsNEVER.COMBINED.locusleads;ALL.DBP.HEAVYvsNEVER.COMBINED.regionleads;ALL.DBP.LIGHTvsN…
rs6855246	4:102191313:A_G	SLC39A8	known	-59727	4	102191313	a	g	0.9051	0.2344	0.05025	3.09103e-06	0.1079	0.06228	0.0831849	-0.002519	107.287	5.045e-24	3.01673e-20	963565	685577	-+?+++	++?++-	8	0.00131	ALL.DBP.CURDRINK.COMBINED.locusleads	49.2	ALL.DBP.CURDRINK.COMBINED.locusleads;ALL.DBP.CURDRINK.FEMALE.locusleads;ALL.DBP.CURDRINK.MALE.locusleads;ALL.DBP.HEAVYvsLIGHT.COMBINED.locusleads;ALL.DBP.HEAVYvsLIGHT.FEMALE.locusleads;ALL.DBP.HEAVYvsLIGHT.FEMALE.regionleads;ALL.DBP.HEAVYvsLIGHT.MALE.locusleads;ALL.DBP.LIGHTvsNEVER.COMBINED.locusleads;ALL.SBP.CURDRINK.COMBINED.locusleads;ALL.SBP.CURDRINK.MALE.locusleads;ALL.SBP.HEAVYvsLIGHT.COMBI…
rs61708525	12:94267677:A_G	PLXNC1	known	0	12	94267677	a	g	0.7049	0.2994	0.06814	1.11338e-05	-0.133	0.07682	0.0833947	-0.004642	41.246	1.281e-08	2.81558e-05	354698	274849	-+++++++--++-+++?-++++-+-++++-+--+++--++++-+++++++??-+++-++++	++-------++---++?++-++--+-+-++-+---+++--+-+----++-??+---+-+--	114	0.4827	EUR.PP.CURDRINK.FEMALE.locusleads	299.3	EUR.PP.CURDRINK.FEMALE.locusleads
rs7924036	10:63431885:G_T	JMJD1C	known	0	10	63431885	t	g	0.5117	-0.1075	0.02657	5.21188e-05	-0.05591	0.03244	0.0848	-0.0007049	92.847	6.895e-21	2.95992e-17	1148450	766202	++---+	--+---	10	0.0404	ALL.DBP.CURDRINK.COMBINED.regionleads	134.1	ALL.DBP.CURDRINK.COMBINED.locusleads;ALL.DBP.CURDRINK.COMBINED.regionleads;ALL.DBP.CURDRINK.FEMALE.locusleads;ALL.DBP.CURDRINK.MALE.locusleads;ALL.DBP.CURDRINK.MALE.regionleads;ALL.DBP.HEAVYvsLIGHT.COMBINED.locusleads;ALL.DBP.HEAVYvsLIGHT.COMBINED.regionleads;ALL.DBP.HEAVYvsLIGHT.MALE.locusleads;ALL.DBP.HEAVYvsLIGHT.MALE.regionleads;ALL.DBP.LIGHTvsNEVER.COMBINED.locusleads;ALL.DBP.LIGHTvsNEVER.MA…
rs3831698	22:33681047:T_TCA	LARGE	novel-T3	0	22	33681047	t	tca	0.1592	0.3029	0.06323	1.6641e-06	-0.1359	0.07894	0.0851491	-0.003994	35.356	2.102e-08	9.79342e-06	1048390	692534	+?++++	+?---+	8	0.1797	ALL.SBP.CURDRINK.COMBINED.locusleads	674.1	ALL.SBP.CURDRINK.COMBINED.locusleads;ALL.SBP.CURDRINK.COMBINED.regionleads
rs7270958	20:63853277:A_G	ABHD16B	known	-7935	20	63853277	a	g	0.0452	0.1518	0.08674	0.0801084	0.1716	0.09975	0.0853778	-0.00752	46.003	4.562e-09	3.0159e-06	829294	628123	--+-++??+?+?-?+-?--++++--?+++--???++-+++-++++-+?--++??+?++++++-	++++--??-?-?+?++?++-++-++?-+-++???-++---+----++?+-+-??-?------+	96	0.38	EUR.DBP.CURDRINK.COMBINED.locusleads	159.8	EUR.DBP.CURDRINK.COMBINED.locusleads
rs6766610	3:11623385:A_C	VGLL4	known	0	3	11623385	a	c	0.5297	0.3044	0.06023	4.32743e-07	-0.1298	0.07552	0.0856599	-0.003626	40.189	1.875e-09	2.70952e-06	495532	315124	++++--	--+-+-	10	0.1172	ALL.SBP.CURDRINK.FEMALE.locusleads	190.3	ALL.SBP.CURDRINK.COMBINED.locusleads;ALL.SBP.CURDRINK.FEMALE.locusleads;ALL.SBP.LIGHTvsNEVER.COMBINED.locusleads
rs9306234	22:19965665:A_C	COMT	known	0	22	19965665	a	c	0.6098	0.07351	0.03169	0.0203593	0.06654	0.03872	0.085707	-0.001003	44.804	1.866e-10	1.56264e-07	1145700	764681	-+++++	+--+--	10	0.01654	ALL.PP.CURDRINK.COMBINED.locusleads	72.3	ALL.PP.CURDRINK.COMBINED.locusleads;ALL.PP.HEAVYvsLIGHT.COMBINED.locusleads;ALL.SBP.CURDRINK.COMBINED.locusleads;ALL.SBP.HEAVYvsLIGHT.COMBINED.locusleads
rs9880112	3:27465287:A_C	SLC4A7	known	0	3	27465287	a	c	0.036	0.8161	0.1228	3.01645e-11	-0.2749	0.16	0.0857738	-0.01507	71.968	2.357e-16	4.86074e-13	926394	609427	+?++++	-?--+-	8	0.4237	ALL.SBP.CURDRINK.COMBINED.locusleads	45.3	ALL.DBP.CURDRINK.COMBINED.locusleads;ALL.PP.CURDRINK.COMBINED.locusleads;ALL.PP.CURDRINK.FEMALE.locusleads;ALL.PP.HEAVYvsNEVER.COMBINED.locusleads;ALL.PP.LIGHTvsNEVER.COMBINED.locusleads;ALL.SBP.CURDRINK.COMBINED.locusleads;ALL.SBP.CURDRINK.FEMALE.locusleads;ALL.SBP.HEAVYvsNEVER.COMBINED.locusleads;ALL.SBP.LIGHTvsNEVER.COMBINED.locusleads;ALL.SBP.LIGHTvsNEVER.FEMALE.locusleads
rs913221	20:11018106:A_C	LOC101929413	known	108834	20	11018106	a	c	0.4159	0.1142	0.02713	2.56092e-05	0.05717	0.03328	0.0858242	-0.0007362	96.843	9.351e-22	4.42152e-18	1150800	768037	+++++-	++-+-+	10	0.02189	ALL.DBP.CURDRINK.COMBINED.locusleads	20.8	ALL.DBP.CURDRINK.COMBINED.locusleads;ALL.DBP.CURDRINK.FEMALE.locusleads;ALL.DBP.CURDRINK.MALE.locusleads;ALL.DBP.HEAVYvsLIGHT.COMBINED.locusleads;ALL.DBP.HEAVYvsLIGHT.FEMALE.locusleads;ALL.DBP.HEAVYvsLIGHT.MALE.locusleads;ALL.DBP.HEAVYvsNEVER.COMBINED.locusleads;ALL.DBP.LIGHTvsNEVER.COMBINED.locusleads;ALL.SBP.CURDRINK.COMBINED.locusleads;ALL.SBP.HEAVYvsLIGHT.COMBINED.locusleads;ALL.SBP.LIGHTvsNE…
rs4359199	11:43699950:C_T	HSD17B12	known	0	11	43699950	t	c	0.4717	-0.185	0.03657	4.21922e-07	-0.1271	0.07402	0.0859603	-0.001336	49.1	9.679e-10	8.26757e-07	632711	176136	---+---++-+-+-+----++-+-+-+--+--++--+++---++-++??+++-+-+--	+--++++--+-+-+--+--++----+-++-++-+-+-+-+-++--+-??--+----+-	110	0.5992	EUR.SBP.HEAVYvsLIGHT.COMBINED.regionleads	435.2	ALL.DBP.CURDRINK.COMBINED.locusleads;ALL.DBP.CURDRINK.COMBINED.regionleads;ALL.SBP.CURDRINK.COMBINED.locusleads;ALL.SBP.CURDRINK.COMBINED.regionleads;ALL.SBP.HEAVYvsLIGHT.COMBINED.locusleads;ALL.SBP.HEAVYvsLIGHT.COMBINED.regionleads;EUR.SBP.CURDRINK.COMBINED.locusleads;EUR.SBP.CURDRINK.COMBINED.regionleads;EUR.SBP.HEAVYvsLIGHT.COMBINED.locusleads;EUR.SBP.HEAVYvsLIGHT.COMBINED.regionleads
rs12948302	17:31263237:G_T	NF1	known	0	17	31263237	t	g	0.3756	0.1337	0.02801	1.81236e-06	-0.05902	0.0344	0.0862174	-0.0007825	36.499	1.187e-08	6.05468e-06	1146430	765079	++++-+	----+-	10	0.825	ALL.DBP.CURDRINK.COMBINED.regionleads	536.2	ALL.DBP.CURDRINK.COMBINED.locusleads;ALL.DBP.CURDRINK.COMBINED.regionleads
rs6122159	20:63739379:G_T	LIME1	known	272	20	63739379	t	g	0.2727	-0.1438	0.03289	1.23029e-05	-0.1064	0.06204	0.0863411	-0.00108	41.661	8.983e-10	1.55122e-06	434275	126614	---++	---++	8	0.9216	ALL.DBP.HEAVYvsLIGHT.MALE.locusleads	159.7	ALL.DBP.CURDRINK.COMBINED.locusleads;ALL.DBP.CURDRINK.MALE.locusleads;ALL.DBP.CURDRINK.MALE.regionleads;ALL.DBP.HEAVYvsLIGHT.COMBINED.locusleads;ALL.DBP.HEAVYvsLIGHT.MALE.locusleads;ALL.DBP.HEAVYvsLIGHT.MALE.regionleads;ALL.SBP.CURDRINK.COMBINED.locusleads;EUR.SBP.HEAVYvsLIGHT.COMBINED.locusleads
rs2966114	16:81557643:C_T	CMIP	known	0	16	81557643	t	c	0.6264	0.07272	0.02732	0.00777272	0.05736	0.03353	0.0871352	-0.0007459	51.726	5.86e-12	6.30314e-09	1147130	765111	+++++-	--++-+	10	0.4539	ALL.DBP.CURDRINK.COMBINED.locusleads	217.2	ALL.DBP.CURDRINK.COMBINED.locusleads;ALL.DBP.CURDRINK.MALE.locusleads;ALL.DBP.HEAVYvsLIGHT.COMBINED.locusleads;ALL.DBP.HEAVYvsLIGHT.MALE.locusleads;ALL.DBP.LIGHTvsNEVER.COMBINED.locusleads
rs2090270	2:161846717:A_C	SLC4A10	known	0	2	161846717	a	c	0.076	-0.1121	0.05046	0.0263129	-0.107	0.06255	0.0871492	-0.002544	39.885	2.183e-09	1.35431e-06	1065400	707020	+---+-	+----+	10	0.4506	ALL.DBP.CURDRINK.COMBINED.locusleads	541.1	ALL.DBP.CURDRINK.COMBINED.locusleads;ALL.DBP.CURDRINK.COMBINED.regionleads;ALL.DBP.CURDRINK.MALE.locusleads;ALL.DBP.CURDRINK.MALE.regionleads;ALL.DBP.HEAVYvsLIGHT.COMBINED.locusleads;ALL.DBP.HEAVYvsLIGHT.COMBINED.regionleads;ALL.DBP.HEAVYvsLIGHT.MALE.locusleads;ALL.DBP.HEAVYvsLIGHT.MALE.regionleads;ALL.SBP.CURDRINK.COMBINED.locusleads;ALL.SBP.CURDRINK.COMBINED.regionleads;ALL.SBP.HEAVYvsLIGHT.COM…
rs17854357	11:65834089:C_G	SNX32	known	0	11	65834089	c	g	0.1627	0.2403	0.04974	1.35766e-06	0.1715	0.1003	0.0872898	-0.002473	45.651	4.106e-09	2.94003e-06	626735	174900	++-+-+-?++++?-?+++++-+?--++??++-+--+-+-++--++--??+++++++++	--+-+-+?--+-?+?--++---?++++??--++++++-+---+--++??+-++----+	98	0.6307	EUR.SBP.HEAVYvsLIGHT.COMBINED.locusleads	114.4	ALL.SBP.CURDRINK.COMBINED.locusleads;ALL.SBP.HEAVYvsLIGHT.COMBINED.locusleads;EUR.SBP.CURDRINK.COMBINED.locusleads;EUR.SBP.HEAVYvsLIGHT.COMBINED.locusleads
rs233724	12:112592423:A_G	PTPN11	known	82510	12	112592423	a	g	0.4783	-0.0521	0.03042	0.0867698	-0.06226	0.03642	0.0873583	-0.0009239	35.244	2.222e-08	1.05411e-05	1065720	737432	+++--+	+-+---	10	0.0001353	ALL.DBP.CURDRINK.COMBINED.locusleads	13.14	ALL.DBP.CURDRINK.COMBINED.locusleads;ALL.DBP.HEAVYvsLIGHT.COMBINED.locusleads
rs855715	10:114063765:G_T	ADRB1	known	16857	10	114063765	t	g	0.109	-0.2022	0.05206	0.00010276	-0.104	0.06097	0.0880533	-0.002707	107.514	4.503e-24	2.69905e-20	963600	686984	--?-+-	++?---	8	0.1712	ALL.DBP.CURDRINK.COMBINED.locusleads	56.5	ALL.DBP.CURDRINK.COMBINED.locusleads;ALL.DBP.CURDRINK.FEMALE.locusleads;ALL.DBP.CURDRINK.MALE.locusleads;ALL.DBP.HEAVYvsLIGHT.COMBINED.locusleads;ALL.DBP.HEAVYvsLIGHT.FEMALE.locusleads;ALL.DBP.HEAVYvsLIGHT.MALE.locusleads;ALL.DBP.HEAVYvsNEVER.COMBINED.locusleads;ALL.DBP.LIGHTvsNEVER.COMBINED.locusleads;ALL.DBP.LIGHTvsNEVER.FEMALE.locusleads;ALL.SBP.CURDRINK.COMBINED.locusleads;ALL.SBP.CURDRINK.FE…
rs13189816	5:32989010:C_T	LOC340113	known	26543	5	32989010	t	c	0.5409	-0.1688	0.03723	5.78831e-06	-0.128	0.07511	0.0883499	-0.001386	41.249	2.598e-08	1.51065e-05	632225	176071	-+-----+-+-++-+++--+---+-+--+++---+-++-----++-???+++-----+	++-+-+-------+-++---++----+----+++-+--+++++---???-----+++-	108	0.422	EUR.SBP.HEAVYvsLIGHT.COMBINED.locusleads	7.15	ALL.DBP.HEAVYvsLIGHT.COMBINED.locusleads;EUR.SBP.HEAVYvsLIGHT.COMBINED.locusleads
rs524552	1:91479478:A_C	CDC7	known	-21368	1	91479478	a	c	0.6576	0.1441	0.03528	4.41781e-05	0.1175	0.069	0.0885871	-0.001243	36.105	1.445e-08	2.11387e-05	281283	79332	+-++-	+++-+	8	0.4309	ALL.DBP.HEAVYvsLIGHT.FEMALE.locusleads	597.2	ALL.DBP.CURDRINK.FEMALE.locusleads;ALL.DBP.CURDRINK.FEMALE.regionleads;ALL.DBP.HEAVYvsLIGHT.FEMALE.locusleads;ALL.DBP.HEAVYvsLIGHT.FEMALE.regionleads
rs17823562	18:45408123:A_C	SLC14A2	known	0	18	45408123	a	c	0.447	0.1447	0.03169	4.9686e-06	-0.06542	0.03854	0.0896103	-0.001003	33.824	4.52e-08	2.18916e-05	1146220	764975	-++++-	+----+	10	0.0643	ALL.PP.CURDRINK.COMBINED.locusleads	52.12	ALL.PP.CURDRINK.COMBINED.locusleads
rs12051272	16:82629683:G_T	CDH13	known	0	16	82629683	t	g	0.0663	-0.1555	0.05115	0.00236517	-0.1249	0.07365	0.0899126	-0.002611	37.087	8.842e-09	4.65315e-06	996584	661117	-?----	+?--++	8	0.31	ALL.DBP.CURDRINK.COMBINED.locusleads	37.6	ALL.DBP.CURDRINK.COMBINED.locusleads;ALL.DBP.CURDRINK.COMBINED.regionleads
rs72828111	10:113082631:A_G	TCF7L2	known	0	10	113082631	a	g	0.2614	0.1631	0.03486	2.88679e-06	-0.0722	0.04259	0.0900311	-0.001215	35.681	1.787e-08	9.63461e-06	1147400	766036	+-+++-	++----	10	0.2857	ALL.PP.CURDRINK.COMBINED.locusleads	94.2	ALL.PP.CURDRINK.COMBINED.locusleads;EUR.PP.CURDRINK.COMBINED.locusleads
rs4131224	7:100946831:A_G	MUC3A	known	-2588	7	100946831	a	g	0.1059	-0.07247	0.05414	0.180712	-0.1062	0.06267	0.0901531	-0.002929	33.672	4.878e-08	2.09084e-05	950193	680030	--?---	++?-++	8	0.6117	ALL.DBP.CURDRINK.COMBINED.locusleads	223.9	ALL.DBP.CURDRINK.COMBINED.locusleads
rs781348894	8:140062975:G_GAAGCCTCAGGAAACTTAC	TRAPPC9	known	0	8	140062975	g	gaagcctcaggaaacttac	0.4897	-0.1392	0.03276	2.14646e-05	-0.06934	0.04092	0.0901654	-0.001072	90.065	2.771e-20	9.23062e-17	988395	653705	-?---+	+?----	8	0.005462	ALL.PP.CURDRINK.COMBINED.locusleads	142.1	ALL.PP.CURDRINK.COMBINED.locusleads;ALL.PP.CURDRINK.COMBINED.regionleads;ALL.PP.CURDRINK.MALE.locusleads;ALL.PP.CURDRINK.MALE.regionleads;ALL.PP.HEAVYvsLIGHT.COMBINED.locusleads;ALL.PP.HEAVYvsLIGHT.COMBINED.regionleads;ALL.PP.HEAVYvsLIGHT.MALE.locusleads;ALL.PP.HEAVYvsLIGHT.MALE.regionleads;ALL.PP.HEAVYvsNEVER.MALE.locusleads;ALL.PP.HEAVYvsNEVER.MALE.regionleads;ALL.PP.LIGHTvsNEVER.COMBINED.locus…
rs9296668	6:51973465:A_G	PKHD1	known	0	6	51973465	a	g	0.5673	-0.1141	0.02734	3.00124e-05	-0.05611	0.03315	0.0905298	-0.0007457	98.738	3.625e-22	1.79101e-18	1147670	766137	-+----	+---++	10	0.1827	ALL.DBP.CURDRINK.COMBINED.locusleads	124.1	ALL.DBP.CURDRINK.COMBINED.locusleads;ALL.DBP.CURDRINK.COMBINED.regionleads;ALL.DBP.CURDRINK.FEMALE.locusleads;ALL.DBP.CURDRINK.FEMALE.regionleads;ALL.DBP.CURDRINK.MALE.locusleads;ALL.DBP.CURDRINK.MALE.regionleads;ALL.DBP.HEAVYvsLIGHT.COMBINED.locusleads;ALL.DBP.HEAVYvsLIGHT.COMBINED.regionleads;ALL.DBP.HEAVYvsLIGHT.FEMALE.locusleads;ALL.DBP.HEAVYvsLIGHT.FEMALE.regionleads;ALL.DBP.HEAVYvsLIGHT.MAL…
rs10854187	20:51500400:A_C	NFATC2	known	0	20	51500400	a	c	0.7034	-0.2217	0.04798	3.82493e-06	0.09969	0.05906	0.0914219	-0.002301	33.848	4.468e-08	1.91698e-05	1146390	765046	+-----	---+++	10	0.3663	ALL.SBP.CURDRINK.COMBINED.locusleads	138.3	ALL.SBP.CURDRINK.COMBINED.locusleads
rs34565858	12:122776806:G_GT	CCDC62	known	0	12	122776806	g	gt	0.1731	0.08297	0.03581	0.0205064	0.07809	0.04629	0.0916085	-0.001281	35.347	2.111e-08	1.0078e-05	1042340	689402	+?-+++	-?+++-	8	0.1436	ALL.DBP.CURDRINK.COMBINED.locusleads	184.3	ALL.DBP.CURDRINK.COMBINED.locusleads;ALL.DBP.HEAVYvsLIGHT.COMBINED.locusleads
rs9349379	6:12903725:A_G	PHACTR1	known	0	6	12903725	a	g	0.5797	0.1755	0.03275	8.37864e-08	0.06684	0.03969	0.0921717	-0.001071	144.906	3.42e-32	3.1878e-28	1149510	767884	+-++++	--++++	10	0.02449	ALL.PP.CURDRINK.COMBINED.regionleads	66.1	ALL.PP.CURDRINK.COMBINED.locusleads;ALL.PP.CURDRINK.COMBINED.regionleads;ALL.PP.CURDRINK.FEMALE.locusleads;ALL.PP.CURDRINK.FEMALE.regionleads;ALL.PP.CURDRINK.MALE.locusleads;ALL.PP.CURDRINK.MALE.regionleads;ALL.PP.HEAVYvsLIGHT.COMBINED.locusleads;ALL.PP.HEAVYvsLIGHT.COMBINED.regionleads;ALL.PP.HEAVYvsLIGHT.FEMALE.locusleads;ALL.PP.HEAVYvsLIGHT.FEMALE.regionleads;ALL.PP.HEAVYvsLIGHT.MALE.locuslead…
rs243954	4:110375870:A_G	ENPEP	known	-100202	4	110375870	a	g	0.3067	0.06448	0.03847	0.0937164	0.07443	0.04421	0.0922676	-0.001479	43.232	1.434e-08	8.12535e-06	786736	592342	++-++-+-+++++-+-?+-+?-+-++++--++???---++---++-+++-+-??++-+++--+	--+--+-+-+--++-+?-+-?+-+---+++++???-+++-+++--+---+-+??--++--++-	110	0.5834	EUR.DBP.CURDRINK.COMBINED.locusleads	116.4	ALL.SBP.CURDRINK.COMBINED.locusleads;EUR.DBP.CURDRINK.COMBINED.locusleads;EUR.DBP.HEAVYvsLIGHT.COMBINED.locusleads
rs6920648	6:52143818:A_G	MIR206	known	-530	6	52143818	a	g	0.617	-0.07123	0.02942	0.0154718	-0.05913	0.03516	0.0926191	-0.0008648	51.478	6.633e-12	7.04539e-09	1144110	764637	-+---+	----++	10	0.2603	ALL.DBP.CURDRINK.COMBINED.locusleads	124.2	ALL.DBP.CURDRINK.COMBINED.locusleads;ALL.DBP.HEAVYvsLIGHT.COMBINED.locusleads
rs62043959	16:81491599:A_C	CMIP	known	0	16	81491599	a	c	0.7541	0.1708	0.03419	5.86492e-07	-0.06811	0.04053	0.0928633	-0.001167	46.92	6.477e-11	5.6506e-08	1072570	740705	++++++	+-----	10	0.2162	ALL.DBP.CURDRINK.COMBINED.locusleads	217.3	ALL.DBP.CURDRINK.COMBINED.locusleads;ALL.DBP.HEAVYvsNEVER.COMBINED.locusleads;ALL.DBP.HEAVYvsNEVER.COMBINED.regionleads;ALL.DBP.LIGHTvsNEVER.COMBINED.locusleads;ALL.SBP.CURDRINK.COMBINED.locusleads;ALL.SBP.CURDRINK.COMBINED.regionleads;EUR.DBP.CURDRINK.COMBINED.locusleads
rs9865724	3:149992398:A_G	TMEM183B	known	9032	3	149992398	a	g	0.2743	0.1911	0.03524	5.86677e-08	-0.07362	0.04382	0.0929467	-0.001241	49.675	1.634e-11	1.66303e-08	1071610	704087	+?+++-	-?----	8	0.1198	ALL.PP.CURDRINK.COMBINED.regionleads	383.1	ALL.PP.CURDRINK.COMBINED.locusleads;ALL.PP.CURDRINK.COMBINED.regionleads;ALL.PP.LIGHTvsNEVER.COMBINED.locusleads;ALL.PP.LIGHTvsNEVER.COMBINED.regionleads;EUR.PP.CURDRINK.COMBINED.locusleads;EUR.PP.CURDRINK.COMBINED.regionleads
rs6456195	6:170277342:A_C	FLJ38122	known	0	6	170277342	a	c	0.1471	-0.1773	0.03623	9.89403e-07	0.07623	0.0454	0.0931374	-0.001312	37.588	6.883e-09	3.73035e-06	1141160	761848	------	++-+-+	10	0.237	ALL.DBP.CURDRINK.COMBINED.regionleads	600.1	ALL.DBP.CURDRINK.COMBINED.locusleads;ALL.DBP.CURDRINK.COMBINED.regionleads;ALL.DBP.CURDRINK.MALE.locusleads;ALL.DBP.CURDRINK.MALE.regionleads;ALL.SBP.CURDRINK.COMBINED.locusleads;ALL.SBP.CURDRINK.COMBINED.regionleads
rs11739036	5:32723372:A_G	NPR3	known	0	5	32723372	a	g	0.3034	0.1778	0.05094	0.000482333	0.1029	0.0614	0.0937586	-0.002593	79.012	6.964e-18	1.72994e-14	1139970	764276	-+-+++	---+--	10	0.006283	ALL.SBP.CURDRINK.COMBINED.locusleads	7.5	ALL.DBP.CURDRINK.COMBINED.locusleads;ALL.DBP.HEAVYvsLIGHT.COMBINED.locusleads;ALL.PP.CURDRINK.COMBINED.locusleads;ALL.PP.CURDRINK.FEMALE.locusleads;ALL.PP.HEAVYvsLIGHT.COMBINED.locusleads;ALL.SBP.CURDRINK.COMBINED.locusleads;ALL.SBP.CURDRINK.FEMALE.locusleads;ALL.SBP.HEAVYvsLIGHT.COMBINED.locusleads;ALL.SBP.HEAVYvsLIGHT.FEMALE.locusleads;ALL.SBP.HEAVYvsLIGHT.MALE.locusleads;EUR.PP.HEAVYvsLIGHT.CO…
rs73234350	6:169158321:A_G	THBS2	known	-57458	6	169158321	a	g	0.0333	-0.4443	0.099	7.19358e-06	0.1973	0.1178	0.0939592	-0.009793	35.009	2.5e-08	1.29877e-05	1039840	725036	--+---	+--+++	10	0.4388	ALL.PP.CURDRINK.COMBINED.locusleads	85.13	ALL.PP.CURDRINK.COMBINED.locusleads
rs12192387	6:78702318:C_T	IRAK1BP1	known	-165225	6	78702318	t	c	0.179	0.1216	0.02945	3.64293e-05	0.09852	0.05885	0.0941136	-0.0008655	35.643	1.821e-08	7.53549e-06	663928	180316	+-++-	-++++	8	0.7692	ALL.DBP.HEAVYvsLIGHT.COMBINED.locusleads	122.4	ALL.DBP.HEAVYvsLIGHT.COMBINED.locusleads
rs2238647	19:18599725:A_G	CRLF1	known	0	19	18599725	a	g	0.2922	-0.2435	0.04447	4.36028e-08	0.1058	0.0632	0.0941206	-0.001974	39.29	2.94e-09	6.92616e-06	362895	191866	-----	+++-+	8	0.8863	ALL.DBP.HEAVYvsNEVER.COMBINED.locusleads	148.4	ALL.DBP.HEAVYvsNEVER.COMBINED.locusleads;ALL.DBP.HEAVYvsNEVER.COMBINED.regionleads;ALL.DBP.LIGHTvsNEVER.COMBINED.locusleads;ALL.SBP.CURDRINK.COMBINED.locusleads;ALL.SBP.HEAVYvsNEVER.COMBINED.locusleads;EAS.DBP.LIGHTvsNEVER.COMBINED.locusleads;EAS.DBP.LIGHTvsNEVER.COMBINED.regionleads
rs34398313	8:140115631:C_CT	TRAPPC9	known	0	8	140115631	ct	c	0.6407	-0.08558	0.03581	0.0168559	-0.07312	0.0437	0.0942827	-0.001281	45.644	1.226e-10	1.0634e-07	1041960	689002	-?----	-?+-++	8	0.6838	ALL.PP.CURDRINK.COMBINED.locusleads	142.4	ALL.PP.CURDRINK.COMBINED.locusleads;ALL.PP.CURDRINK.MALE.locusleads
rs12930129	16:70614012:A_G	IL34	known	0	16	70614012	a	g	0.4914	-0.07162	0.03084	0.0202163	-0.06337	0.03788	0.0943441	-0.0009496	42.783	5.125e-10	3.91948e-07	1146810	764973	------	-----+	10	0.2706	ALL.PP.CURDRINK.COMBINED.locusleads	22.9	ALL.PP.CURDRINK.COMBINED.locusleads;ALL.PP.HEAVYvsLIGHT.COMBINED.locusleads
rs75940076	3:53683929:A_G	CACNA1D	known	0	3	53683929	a	g	0.122	0.08154	0.05035	0.105348	0.09754	0.05847	0.0952749	-0.002533	38.749	3.853e-09	2.2386e-06	951011	680825	--?+-+	++?++-	8	0.3432	ALL.DBP.CURDRINK.COMBINED.locusleads	50.13	ALL.DBP.CURDRINK.COMBINED.locusleads;ALL.DBP.HEAVYvsLIGHT.COMBINED.locusleads;ALL.SBP.CURDRINK.COMBINED.locusleads;ALL.SBP.HEAVYvsLIGHT.COMBINED.locusleads
rs9885577	5:121858531:C_T	FTMT	known	5703	5	121858531	t	c	0.3647	0.1814	0.03677	8.0823e-07	0.1237	0.07417	0.0953574	-0.001351	46.743	7.079e-11	5.19319e-08	747855	207588	+++++	-++--	8	0.5367	ALL.SBP.HEAVYvsLIGHT.COMBINED.locusleads	426.1	ALL.PP.CURDRINK.COMBINED.locusleads;ALL.PP.CURDRINK.COMBINED.regionleads;ALL.PP.HEAVYvsLIGHT.COMBINED.locusleads;ALL.PP.HEAVYvsLIGHT.COMBINED.regionleads;ALL.SBP.CURDRINK.COMBINED.locusleads;ALL.SBP.CURDRINK.COMBINED.regionleads;ALL.SBP.HEAVYvsLIGHT.COMBINED.locusleads;ALL.SBP.HEAVYvsLIGHT.COMBINED.regionleads;EUR.PP.CURDRINK.COMBINED.locusleads;EUR.PP.CURDRINK.COMBINED.regionleads;EUR.PP.HEAVYvs…
rs77764666	20:10736801:A_C	LOC101929395	known	-16288	20	10736801	a	c	0.9344	-0.1884	0.05807	0.00117715	-0.1158	0.06944	0.0953898	-0.00337	74.098	8.127e-17	2.17673e-13	1106570	744854	+-----	--+--+	10	0.3475	ALL.DBP.CURDRINK.COMBINED.locusleads	20.13	ALL.DBP.CURDRINK.COMBINED.locusleads;ALL.DBP.CURDRINK.MALE.locusleads;ALL.DBP.HEAVYvsLIGHT.COMBINED.locusleads;ALL.DBP.HEAVYvsLIGHT.MALE.locusleads;ALL.DBP.LIGHTvsNEVER.COMBINED.locusleads;ALL.DBP.LIGHTvsNEVER.MALE.locusleads;EUR.DBP.CURDRINK.COMBINED.locusleads;EUR.DBP.CURDRINK.MALE.locusleads;EUR.DBP.HEAVYvsLIGHT.COMBINED.locusleads;EUR.DBP.HEAVYvsLIGHT.MALE.locusleads;EUR.DBP.LIGHTvsNEVER.COMB…
NA	10:47327566:G_T	GDF2	known	1296	10	47327566	t	g	0.1566	-0.1158	0.05929	0.0508063	-0.1172	0.07028	0.0953921	-0.003516	41.945	7.796e-10	5.43135e-07	562537	453023	-?---+	-?--+-	8	0.7681	ALL.DBP.CURDRINK.COMBINED.regionleads	505	ALL.DBP.CURDRINK.COMBINED.regionleads;ALL.DBP.HEAVYvsLIGHT.COMBINED.regionleads
rs17512515	17:61207116:G_T	BCAS3	known	0	17	61207116	t	g	0.8658	-0.2175	0.04549	1.74191e-06	0.0882	0.05293	0.0956434	-0.002069	45.597	1.255e-10	1.03666e-07	1060050	737256	-+----	---+++	10	0.1379	ALL.DBP.CURDRINK.COMBINED.locusleads	59.5	ALL.DBP.CURDRINK.COMBINED.locusleads;ALL.DBP.CURDRINK.MALE.locusleads;ALL.SBP.CURDRINK.COMBINED.locusleads;ALL.SBP.CURDRINK.MALE.locusleads
rs1171830	10:59906128:A_C	CCDC6	known	0	10	59906128	a	c	0.4714	0.1777	0.03172	2.11717e-08	-0.06424	0.0386	0.0960627	-0.001004	57.608	3.094e-13	4.13824e-10	1146850	765912	+-++++	++----	10	0.02334	ALL.PP.CURDRINK.COMBINED.regionleads	304.1	ALL.PP.CURDRINK.COMBINED.locusleads;ALL.PP.CURDRINK.COMBINED.regionleads;ALL.PP.CURDRINK.MALE.locusleads;ALL.PP.CURDRINK.MALE.regionleads;ALL.PP.HEAVYvsLIGHT.COMBINED.locusleads;ALL.PP.HEAVYvsLIGHT.COMBINED.regionleads;ALL.PP.LIGHTvsNEVER.COMBINED.locusleads;ALL.PP.LIGHTvsNEVER.COMBINED.regionleads;ALL.SBP.CURDRINK.COMBINED.locusleads;ALL.SBP.CURDRINK.COMBINED.regionleads;EUR.PP.CURDRINK.COMBINED…
rs11642015	16:53768582:C_T	FTO	known	0	16	53768582	t	c	0.3444	0.4568	0.05026	1.00195e-19	-0.09945	0.05996	0.0971953	-0.002522	200.648	2.691e-44	7.62027e-40	1146620	767473	++++++	-+---+	10	0.903	ALL.SBP.CURDRINK.COMBINED.regionleads	42.1	ALL.DBP.CURDRINK.COMBINED.locusleads;ALL.DBP.CURDRINK.COMBINED.regionleads;ALL.DBP.CURDRINK.FEMALE.locusleads;ALL.DBP.CURDRINK.FEMALE.regionleads;ALL.DBP.HEAVYvsLIGHT.COMBINED.locusleads;ALL.DBP.HEAVYvsLIGHT.COMBINED.regionleads;ALL.DBP.HEAVYvsLIGHT.FEMALE.locusleads;ALL.DBP.HEAVYvsLIGHT.FEMALE.regionleads;ALL.DBP.LIGHTvsNEVER.COMBINED.locusleads;ALL.DBP.LIGHTvsNEVER.COMBINED.regionleads;ALL.DBP.…
rs151117229	6:26491127:C_T	LOC285819	known	8618	6	26491127	t	c	0.0322	0.3809	0.08807	1.52553e-05	-0.1702	0.1028	0.0977943	-0.007754	34.469	3.274e-08	1.47902e-05	1005770	709324	--++-+	-+--+-	10	0.7834	ALL.DBP.CURDRINK.COMBINED.locusleads	39.25	ALL.DBP.CURDRINK.COMBINED.locusleads
rs7817124	8:80491773:C_G	ZBTB10	known	0	8	80491773	c	g	0.2561	-0.2408	0.04063	3.09167e-09	-0.1352	0.08172	0.0980402	-0.001646	63.087	1.999e-14	3.0241e-11	750583	208483	+----	----+	8	0.509	ALL.SBP.HEAVYvsLIGHT.COMBINED.locusleads	260.1	ALL.PP.CURDRINK.COMBINED.locusleads;ALL.PP.CURDRINK.COMBINED.regionleads;ALL.PP.CURDRINK.MALE.locusleads;ALL.PP.CURDRINK.MALE.regionleads;ALL.PP.HEAVYvsLIGHT.COMBINED.locusleads;ALL.PP.HEAVYvsLIGHT.COMBINED.regionleads;ALL.PP.HEAVYvsLIGHT.MALE.locusleads;ALL.PP.HEAVYvsLIGHT.MALE.regionleads;ALL.SBP.CURDRINK.COMBINED.locusleads;ALL.SBP.CURDRINK.COMBINED.regionleads;ALL.SBP.CURDRINK.MALE.locusleads…
rs12660433	6:169190592:C_T	THBS2	known	-25187	6	169190592	t	c	0.1276	0.2718	0.04376	5.25977e-10	-0.09024	0.05459	0.0983207	-0.001914	69.419	8.429e-16	1.62927e-12	1145240	764782	++++++	-----+	10	0.279	ALL.PP.CURDRINK.COMBINED.locusleads	85.4	ALL.PP.CURDRINK.COMBINED.locusleads;ALL.PP.CURDRINK.FEMALE.locusleads;ALL.PP.CURDRINK.MALE.locusleads;ALL.PP.HEAVYvsLIGHT.COMBINED.locusleads;ALL.PP.HEAVYvsLIGHT.FEMALE.locusleads;ALL.PP.HEAVYvsNEVER.COMBINED.locusleads;EUR.PP.CURDRINK.COMBINED.locusleads;EUR.PP.CURDRINK.FEMALE.locusleads;EUR.PP.HEAVYvsLIGHT.COMBINED.locusleads;EUR.PP.HEAVYvsLIGHT.FEMALE.locusleads;EUR.PP.HEAVYvsNEVER.COMBINED.lo…
rs7161968	15:40586486:C_T	CASC5	known	-7762	15	40586486	t	c	0.2571	-0.07997	0.03143	0.0109471	-0.06564	0.03974	0.0985883	-0.0009841	41.726	8.694e-10	5.98429e-07	1148180	765999	-+----	----+-	10	0.6961	ALL.DBP.CURDRINK.COMBINED.locusleads	178.6	ALL.DBP.CURDRINK.COMBINED.locusleads;ALL.DBP.HEAVYvsLIGHT.COMBINED.locusleads
rs832891	15:64875134:A_T	PLEKHO2	known	7132	15	64875134	a	t	0.3138	-0.06541	0.03812	0.0861809	-0.07398	0.0448	0.0986693	-0.001452	37.773	6.276e-09	3.78793e-06	1138960	763273	-++---	+----+	10	0.4982	ALL.PP.CURDRINK.COMBINED.locusleads	572.2	ALL.PP.CURDRINK.COMBINED.locusleads;ALL.PP.HEAVYvsLIGHT.COMBINED.locusleads
rs1840705	10:61530518:C_G	TMEM26	known	77068	10	61530518	c	g	0.3406	0.1163	0.02243	2.15992e-07	0.07315	0.04431	0.0987654	-0.0005025	51.438	6.768e-12	6.70761e-09	751304	208593	++++-	-++--	8	0.8968	ALL.DBP.HEAVYvsLIGHT.COMBINED.locusleads	40.4	ALL.DBP.CURDRINK.COMBINED.locusleads;ALL.DBP.CURDRINK.MALE.locusleads;ALL.DBP.HEAVYvsLIGHT.COMBINED.locusleads;ALL.DBP.HEAVYvsLIGHT.MALE.locusleads;ALL.SBP.HEAVYvsLIGHT.COMBINED.locusleads;EUR.DBP.CURDRINK.COMBINED.locusleads;EUR.DBP.HEAVYvsLIGHT.COMBINED.locusleads;EUR.DBP.HEAVYvsLIGHT.MALE.locusleads
rs4305	17:63480868:A_G	ACE	known	0	17	63480868	a	g	0.4644	0.2442	0.04549	7.95207e-08	-0.09153	0.05547	0.0989263	-0.002066	51.614	6.195e-12	6.03839e-09	1146490	765107	+-++++	-+--+-	10	0.5943	ALL.SBP.CURDRINK.COMBINED.locusleads	157.2	ALL.DBP.CURDRINK.COMBINED.locusleads;ALL.DBP.LIGHTvsNEVER.COMBINED.locusleads;ALL.SBP.CURDRINK.COMBINED.locusleads;ALL.SBP.HEAVYvsNEVER.FEMALE.locusleads;ALL.SBP.HEAVYvsNEVER.FEMALE.regionleads;ALL.SBP.LIGHTvsNEVER.COMBINED.locusleads
rs1077795	19:17111774:A_G	MYO9B	known	0	19	17111774	a	g	0.7774	0.1028	0.03401	0.0025058	0.06668	0.04047	0.0994265	-0.001156	68.693	1.212e-15	2.62979e-12	1142040	764453	+-+++-	++++++	10	0.7608	ALL.DBP.CURDRINK.COMBINED.regionleads	224.1	ALL.DBP.CURDRINK.COMBINED.locusleads;ALL.DBP.CURDRINK.COMBINED.regionleads;ALL.DBP.CURDRINK.FEMALE.locusleads;ALL.DBP.CURDRINK.FEMALE.regionleads;ALL.DBP.HEAVYvsLIGHT.COMBINED.locusleads;ALL.DBP.HEAVYvsLIGHT.COMBINED.regionleads;ALL.DBP.HEAVYvsLIGHT.FEMALE.locusleads;ALL.DBP.HEAVYvsLIGHT.FEMALE.regionleads;ALL.DBP.LIGHTvsNEVER.COMBINED.locusleads;ALL.DBP.LIGHTvsNEVER.COMBINED.regionleads;ALL.SBP.…
rs55714388	1:11850405:A_C	NPPA	known	2622	1	11850405	a	c	0.9144	0.5152	0.1016	3.96009e-07	0.1932	0.1175	0.100123	-0.01031	168.652	2.386e-37	4.23254e-33	948876	680245	+-?+++	++?+++	8	0.9733	ALL.SBP.CURDRINK.COMBINED.locusleads	15.3	ALL.DBP.CURDRINK.FEMALE.locusleads;ALL.DBP.HEAVYvsLIGHT.COMBINED.locusleads;ALL.DBP.HEAVYvsLIGHT.FEMALE.locusleads;ALL.DBP.HEAVYvsLIGHT.MALE.locusleads;ALL.DBP.LIGHTvsNEVER.COMBINED.locusleads;ALL.DBP.LIGHTvsNEVER.FEMALE.locusleads;ALL.PP.CURDRINK.COMBINED.locusleads;ALL.PP.CURDRINK.FEMALE.locusleads;ALL.PP.CURDRINK.MALE.locusleads;ALL.PP.HEAVYvsLIGHT.COMBINED.locusleads;ALL.PP.HEAVYvsLIGHT.MALE.…
rs4729576	7:100094971:A_G	MCM7	known	0	7	100094971	a	g	0.2841	0.0973	0.02912	0.000833732	0.05855	0.03562	0.10023	-0.0008476	68.73	1.19e-15	2.58567e-12	1147220	765149	+-++++	-++++-	10	0.3401	ALL.DBP.CURDRINK.COMBINED.regionleads	223.1	ALL.DBP.CURDRINK.COMBINED.locusleads;ALL.DBP.CURDRINK.COMBINED.regionleads;ALL.DBP.CURDRINK.FEMALE.locusleads;ALL.DBP.CURDRINK.FEMALE.regionleads;ALL.DBP.CURDRINK.MALE.locusleads;ALL.DBP.CURDRINK.MALE.regionleads;ALL.DBP.HEAVYvsLIGHT.COMBINED.locusleads;ALL.DBP.HEAVYvsLIGHT.COMBINED.regionleads;ALL.DBP.HEAVYvsLIGHT.FEMALE.locusleads;ALL.DBP.HEAVYvsLIGHT.FEMALE.regionleads;ALL.DBP.LIGHTvsNEVER.COM…
rs62065775	17:44982887:C_T	C1QL1	known	14611	17	44982887	t	c	0.2226	0.1724	0.02956	5.46994e-09	-0.09441	0.05744	0.100253	-0.0008727	36.521	1.174e-08	5.5809e-06	746296	207561	+++++	+----	8	0.6565	ALL.PP.HEAVYvsLIGHT.COMBINED.locusleads	41.38	ALL.PP.CURDRINK.COMBINED.locusleads;ALL.PP.HEAVYvsLIGHT.COMBINED.locusleads;ALL.PP.LIGHTvsNEVER.COMBINED.locusleads
rs7115200	11:72041114:G_T	NUMA1	known	0	11	72041114	t	g	0.555	-0.123	0.02687	4.7035e-06	0.05413	0.03295	0.100426	-0.0007214	33.917	4.315e-08	1.87941e-05	1140670	760794	-+----	+-++++	10	0.6163	ALL.DBP.CURDRINK.COMBINED.locusleads	521.5	ALL.DBP.CURDRINK.COMBINED.locusleads
rs149042196	6:121621557:A_G	GJA1	known	171813	6	121621557	a	g	0.0393	-0.1967	0.0749	0.00863521	-0.1625	0.09913	0.101159	-0.005606	37.405	7.544e-09	4.4632e-06	953580	634507	+?---+	-?+---	8	0.07828	ALL.PP.CURDRINK.COMBINED.locusleads	95.4	ALL.PP.CURDRINK.COMBINED.locusleads
rs79928910	3:141422019:A_G	ZBTB38	known	0	3	141422019	a	g	0.0824	0.1586	0.0456	0.000505038	0.09547	0.05829	0.101454	-0.002079	60.94	5.847e-14	9.2214e-11	1137660	759302	+-++--	++-+++	10	0.1254	ALL.DBP.CURDRINK.COMBINED.locusleads	271.2	ALL.DBP.CURDRINK.COMBINED.locusleads;ALL.DBP.HEAVYvsLIGHT.COMBINED.locusleads
rs8067445	17:76691695:G_T	MXRA7	known	0	17	76691695	t	g	0.4058	-0.08837	0.03107	0.00445199	-0.06207	0.03802	0.102561	-0.0009643	55.026	1.125e-12	1.37324e-09	1145880	764363	------	-+--+-	10	0.8945	ALL.PP.CURDRINK.COMBINED.locusleads	327.1	ALL.PP.CURDRINK.COMBINED.locusleads;ALL.PP.CURDRINK.COMBINED.regionleads;ALL.PP.HEAVYvsLIGHT.COMBINED.locusleads;ALL.PP.HEAVYvsLIGHT.COMBINED.regionleads;ALL.PP.HEAVYvsNEVER.COMBINED.locusleads;ALL.PP.HEAVYvsNEVER.COMBINED.regionleads;EUR.PP.CURDRINK.COMBINED.locusleads;EUR.PP.CURDRINK.COMBINED.regionleads;EUR.PP.HEAVYvsLIGHT.COMBINED.locusleads;EUR.PP.HEAVYvsLIGHT.COMBINED.regionleads
rs62375215	5:133069945:C_G	HSPA4	known	0	5	133069945	c	g	0.7639	0.07639	0.03214	0.0174641	0.06302	0.03872	0.103613	-0.001032	47.211	5.602e-11	4.94987e-08	1144160	764660	+++++-	++-+-+	10	0.8164	ALL.DBP.CURDRINK.COMBINED.regionleads	418.1	ALL.DBP.CURDRINK.COMBINED.locusleads;ALL.DBP.CURDRINK.COMBINED.regionleads;ALL.DBP.CURDRINK.FEMALE.locusleads;ALL.DBP.CURDRINK.FEMALE.regionleads;ALL.DBP.HEAVYvsLIGHT.COMBINED.locusleads;ALL.DBP.HEAVYvsLIGHT.COMBINED.regionleads;EUR.DBP.CURDRINK.COMBINED.locusleads;EUR.DBP.CURDRINK.COMBINED.regionleads;EUR.DBP.HEAVYvsLIGHT.COMBINED.locusleads;EUR.DBP.HEAVYvsLIGHT.COMBINED.regionleads
rs7609476	2:215429293:A_C	FN1	known	0	2	215429293	a	c	0.472	-0.1123	0.02549	1.05467e-05	-0.0827	0.05086	0.103943	-0.0006486	38.96	3.467e-09	1.89348e-06	725585	201347	-+-++	-+---	8	0.2079	ALL.PP.HEAVYvsLIGHT.COMBINED.locusleads	83.3	ALL.PP.HEAVYvsLIGHT.COMBINED.locusleads;ALL.PP.HEAVYvsLIGHT.MALE.locusleads
NA	16:69518882:C_G	MIR1538	known	-46925	16	69518882	c	g	0.7943	-0.1786	0.03112	9.51953e-09	-0.09898	0.06088	0.103988	-0.0009672	61.02	5.618e-14	8.25598e-11	737259	205128	----+	-+--+	8	0.4118	ALL.PP.HEAVYvsLIGHT.COMBINED.locusleads	22.3	ALL.PP.CURDRINK.COMBINED.locusleads;ALL.PP.CURDRINK.MALE.locusleads;ALL.PP.HEAVYvsLIGHT.COMBINED.locusleads;ALL.PP.HEAVYvsLIGHT.MALE.locusleads;EUR.PP.CURDRINK.COMBINED.locusleads
rs956006	15:62516340:C_T	MGC15885	known	-120831	15	62516340	t	c	0.3086	-0.2243	0.03379	3.17842e-11	0.0668	0.04117	0.104688	-0.001141	88.816	5.174e-20	1.66726e-16	1142170	762200	------	++-+--	10	0.4269	ALL.PP.CURDRINK.COMBINED.regionleads	145.1	ALL.PP.CURDRINK.COMBINED.locusleads;ALL.PP.CURDRINK.COMBINED.regionleads;ALL.PP.CURDRINK.FEMALE.locusleads;ALL.PP.CURDRINK.FEMALE.regionleads;ALL.PP.CURDRINK.MALE.locusleads;ALL.PP.CURDRINK.MALE.regionleads;ALL.PP.HEAVYvsLIGHT.COMBINED.locusleads;ALL.PP.HEAVYvsNEVER.COMBINED.locusleads;ALL.PP.HEAVYvsNEVER.COMBINED.regionleads;ALL.PP.LIGHTvsNEVER.COMBINED.locusleads;ALL.PP.LIGHTvsNEVER.COMBINED.re…
rs7803865	7:100908172:A_G	ACHE	known	12201	7	100908172	a	g	0.533	-0.07783	0.03467	0.0247758	-0.06419	0.03966	0.105553	-0.001201	59.287	1.89e-11	2.33337e-08	842295	637492	----+-----++-+----+-+-+--+--+--?+++--+--++++--+--+++----++--++-	--+-++++++--++-+-++----++-+--++?-+---+-+----++-++-+---++--+----	122	0.4461	EUR.DBP.CURDRINK.COMBINED.locusleads	223.4	ALL.DBP.CURDRINK.COMBINED.locusleads;ALL.DBP.HEAVYvsLIGHT.COMBINED.locusleads;EUR.DBP.CURDRINK.COMBINED.locusleads;EUR.DBP.HEAVYvsLIGHT.COMBINED.locusleads
rs2077218	10:94311804:A_G	PLCE1	known	0	10	94311804	a	g	0.7759	0.1812	0.05277	0.000595251	0.1043	0.06449	0.105812	-0.002783	70.868	4.086e-16	8.15653e-13	1149940	767841	+++++-	+-++-+	10	0.5429	ALL.SBP.CURDRINK.COMBINED.locusleads	46.5	ALL.DBP.CURDRINK.COMBINED.locusleads;ALL.DBP.CURDRINK.MALE.locusleads;ALL.DBP.HEAVYvsLIGHT.COMBINED.locusleads;ALL.PP.CURDRINK.COMBINED.locusleads;ALL.PP.HEAVYvsLIGHT.COMBINED.locusleads;ALL.SBP.CURDRINK.COMBINED.locusleads;ALL.SBP.CURDRINK.FEMALE.locusleads;ALL.SBP.CURDRINK.MALE.locusleads;ALL.SBP.HEAVYvsLIGHT.COMBINED.locusleads;ALL.SBP.HEAVYvsLIGHT.MALE.locusleads;ALL.SBP.LIGHTvsNEVER.COMBINED…
rs60818561	8:141358060:C_G	GPR20	known	0	8	141358060	c	g	0.943	-0.2278	0.04877	2.99877e-06	-0.1599	0.09892	0.105995	-0.002375	42.045	7.413e-10	4.53413e-07	663555	180276	-?-+?	-?--?	4	0.7261	ALL.DBP.HEAVYvsLIGHT.COMBINED.locusleads	326.4	ALL.DBP.CURDRINK.COMBINED.locusleads;ALL.DBP.HEAVYvsLIGHT.COMBINED.locusleads;ALL.SBP.CURDRINK.COMBINED.locusleads;EUR.DBP.CURDRINK.COMBINED.locusleads;EUR.DBP.CURDRINK.COMBINED.regionleads;EUR.DBP.HEAVYvsLIGHT.COMBINED.locusleads;EUR.DBP.HEAVYvsLIGHT.COMBINED.regionleads
rs4906335	14:103554804:A_C	BAG5	known	-1739	14	103554804	a	c	0.2807	0.06908	0.03811	0.0698862	0.0706	0.04376	0.106669	-0.001452	45.385	5.893e-09	3.76437e-06	839653	634811	-+-+-++-++++-+-+?-+------++-+++-+++----++++-++-+----??---+++++-	+++-+--------+++?++++++++--+--+++---++++-+-+-++-++++??+++--+---	118	0.8703	EUR.DBP.CURDRINK.COMBINED.locusleads	323.2	EUR.DBP.CURDRINK.COMBINED.locusleads;EUR.DBP.CURDRINK.COMBINED.regionleads;EUR.DBP.HEAVYvsLIGHT.COMBINED.locusleads;EUR.DBP.HEAVYvsLIGHT.COMBINED.regionleads
rs6710439	2:207676904:G_T	CCNYL1	known	-34635	2	207676904	t	g	0.4454	-0.2485	0.05073	9.65798e-07	0.09767	0.06054	0.106676	-0.002571	44.642	2.023e-10	1.48365e-07	1065160	736468	------	++++++	10	0.9517	ALL.SBP.CURDRINK.COMBINED.locusleads	239.2	ALL.DBP.CURDRINK.COMBINED.locusleads;ALL.SBP.CURDRINK.COMBINED.locusleads
rs541203	10:95469382:C_G	SORBS1	known	0	10	95469382	c	g	0.4551	0.156	0.03506	8.60644e-06	0.1131	0.07024	0.107356	-0.001228	39.296	2.93e-09	1.48808e-06	750563	208486	+++++	+-++-	8	0.07423	ALL.SBP.HEAVYvsLIGHT.COMBINED.locusleads	46.9	ALL.PP.HEAVYvsLIGHT.COMBINED.locusleads;ALL.PP.HEAVYvsLIGHT.COMBINED.regionleads;ALL.SBP.CURDRINK.COMBINED.locusleads;ALL.SBP.HEAVYvsLIGHT.COMBINED.locusleads;EUR.PP.HEAVYvsLIGHT.COMBINED.locusleads;EUR.PP.HEAVYvsLIGHT.COMBINED.regionleads;EUR.SBP.HEAVYvsLIGHT.COMBINED.locusleads
rs17836882	12:89791082:A_C	LINC00936	known	79130	12	89791082	a	c	0.1061	-0.5832	0.1355	1.67697e-05	-0.3431	0.2132	0.107554	-0.01837	50.192	1.043e-10	5.25573e-07	173316	75938	-??---+--???-	-??++--++???+	14	0.9624	EAS.SBP.CURDRINK.COMBINED.locusleads	3.9	EAS.DBP.CURDRINK.COMBINED.locusleads;EAS.SBP.CURDRINK.COMBINED.locusleads
rs28456011	1:1631827:A_G	MMP23B	known	-353	1	1631827	a	g	0.1769	0.09276	0.04899	0.0582984	0.09535	0.0593	0.107851	-0.002398	35.151	2.328e-08	1.21996e-05	975872	686242	-?+++-	+?++++	8	0.4616	ALL.PP.CURDRINK.COMBINED.locusleads	171.8	ALL.PP.CURDRINK.COMBINED.locusleads
rs3176468	1:50973209:C_T	CDKN2C	known	0	1	50973209	t	c	0.9034	-0.2859	0.04344	4.65751e-11	0.08662	0.05391	0.108109	-0.001885	82.081	1.501e-18	4.99345e-15	1141280	762722	------	-+++++	10	0.871	ALL.DBP.CURDRINK.COMBINED.regionleads	162.1	ALL.DBP.CURDRINK.COMBINED.locusleads;ALL.DBP.CURDRINK.COMBINED.regionleads;ALL.DBP.CURDRINK.FEMALE.locusleads;ALL.DBP.CURDRINK.FEMALE.regionleads;ALL.DBP.CURDRINK.MALE.locusleads;ALL.DBP.CURDRINK.MALE.regionleads;ALL.DBP.HEAVYvsLIGHT.COMBINED.locusleads;ALL.DBP.HEAVYvsLIGHT.COMBINED.regionleads;ALL.DBP.HEAVYvsLIGHT.FEMALE.locusleads;ALL.DBP.HEAVYvsLIGHT.FEMALE.regionleads;ALL.DBP.LIGHTvsNEVER.COM…
rs16892639	8:119450019:A_T	NOV	known	25581	8	119450019	a	t	0.2601	0.2798	0.03509	1.53891e-15	0.06892	0.04291	0.10824	-0.00123	261.335	1.785e-57	4.3247e-53	1144560	764635	++++++	---+-+	10	4.868e-11	ALL.PP.CURDRINK.COMBINED.locusleads	6.2	ALL.DBP.CURDRINK.COMBINED.locusleads;ALL.DBP.HEAVYvsLIGHT.COMBINED.locusleads;ALL.DBP.LIGHTvsNEVER.COMBINED.locusleads;ALL.PP.CURDRINK.COMBINED.locusleads;ALL.PP.CURDRINK.FEMALE.locusleads;ALL.PP.CURDRINK.MALE.locusleads;ALL.PP.HEAVYvsLIGHT.COMBINED.locusleads;ALL.PP.HEAVYvsLIGHT.FEMALE.locusleads;ALL.PP.HEAVYvsLIGHT.MALE.locusleads;ALL.PP.HEAVYvsNEVER.COMBINED.locusleads;ALL.SBP.CURDRINK.COMBINE…
rs12234997	8:9380198:A_G	LOC157273	known	45118	8	9380198	a	g	0.4469	0.274	0.05874	3.09182e-06	-0.1076	0.067	0.10828	-0.003429	46.892	5.651e-09	3.5673e-06	838386	634058	-++---+--+-++-?--++-++-++---+-++---++--+-++++++--+++++++-+++-+-	+---++--+-+--+?++-++--++-+++-+-++++-+++-++----++++------+---+-+	122	0.5309	EUR.SBP.CURDRINK.COMBINED.locusleads	97.3	EUR.SBP.CURDRINK.COMBINED.locusleads
rs188955288	19:4067316:C_T	ZBTB7A	known	498	19	4067316	t	c	0.1889	-0.1183	0.04988	0.0177068	-0.09563	0.05957	0.108419	-0.002485	48.433	3.039e-11	2.94388e-08	877454	619795	-??-++	-??-+-	6	0.615	ALL.PP.CURDRINK.COMBINED.regionleads	402.1	ALL.PP.CURDRINK.COMBINED.locusleads;ALL.PP.CURDRINK.COMBINED.regionleads;ALL.PP.CURDRINK.MALE.locusleads;ALL.PP.CURDRINK.MALE.regionleads;ALL.PP.HEAVYvsLIGHT.COMBINED.locusleads;ALL.PP.HEAVYvsLIGHT.COMBINED.regionleads;EUR.PP.CURDRINK.COMBINED.locusleads;EUR.PP.CURDRINK.COMBINED.regionleads;EUR.PP.HEAVYvsLIGHT.COMBINED.locusleads;EUR.PP.HEAVYvsLIGHT.COMBINED.regionleads
rs7943060	11:1857871:C_G	LSP1	known	0	11	1857871	c	g	0.6956	-0.1646	0.05028	0.00106161	-0.09741	0.06073	0.108717	-0.002526	69.534	7.959e-16	1.51561e-12	1139950	760803	+---+-	--+--+	10	0.1087	ALL.SBP.CURDRINK.COMBINED.locusleads	29.4	ALL.SBP.CURDRINK.COMBINED.locusleads;ALL.SBP.HEAVYvsLIGHT.MALE.locusleads
rs148867855	1:42552568:A_AT	CCDC30	known	0	1	42552568	a	at	0.8442	0.1659	0.03813	1.35577e-05	0.1135	0.07077	0.108761	-0.001453	40.893	1.319e-09	8.06415e-07	644320	189562	+++++	+-+--	8	0.7855	ALL.PP.HEAVYvsLIGHT.COMBINED.locusleads	92.3	ALL.PP.CURDRINK.COMBINED.locusleads;ALL.PP.HEAVYvsLIGHT.COMBINED.locusleads
rs10922151	1:196989168:G_T	CFHR5	known	0	1	196989168	t	g	0.7835	-0.1894	0.04559	3.26114e-05	-0.145	0.09059	0.109462	-0.002072	35.396	2.06e-08	8.57086e-06	740788	206734	-----	----+	8	0.7715	ALL.SBP.HEAVYvsLIGHT.COMBINED.locusleads	672.1	ALL.SBP.CURDRINK.COMBINED.locusleads;ALL.SBP.CURDRINK.COMBINED.regionleads;ALL.SBP.HEAVYvsLIGHT.COMBINED.locusleads;ALL.SBP.HEAVYvsLIGHT.COMBINED.regionleads
rs11160546	14:99767016:C_T	EML1	known	-26391	14	99767016	t	c	0.6602	0.2585	0.04457	6.63682e-09	-0.08101	0.05063	0.10959	-0.001986	87.991	1.221e-16	3.12515e-13	839658	634811	+++++++++++-++++?-++++--+++++-+-++-++++++-+-++-+++++??+--+-++++	+++-+------+----?+-----+-----+-+--+++---++-+-----++-??-++-++++-	118	0.6248	EUR.PP.CURDRINK.COMBINED.regionleads	155.2	ALL.PP.CURDRINK.COMBINED.locusleads;ALL.PP.CURDRINK.FEMALE.locusleads;ALL.PP.CURDRINK.MALE.locusleads;ALL.PP.HEAVYvsLIGHT.COMBINED.locusleads;ALL.PP.HEAVYvsLIGHT.MALE.locusleads;ALL.PP.HEAVYvsLIGHT.MALE.regionleads;ALL.PP.LIGHTvsNEVER.COMBINED.locusleads;ALL.SBP.CURDRINK.COMBINED.locusleads;EUR.PP.CURDRINK.COMBINED.locusleads;EUR.PP.CURDRINK.COMBINED.regionleads;EUR.PP.CURDRINK.MALE.locusleads;EU…
rs1800780	7:151001791:A_G	NOS3	known	0	7	151001791	a	g	0.4402	0.05736	0.02665	0.0313702	0.05208	0.03257	0.109817	-0.0007093	38.541	4.276e-09	2.45588e-06	1150990	768116	--++++	+++++-	10	0.07571	ALL.DBP.CURDRINK.COMBINED.locusleads	27.9	ALL.DBP.CURDRINK.COMBINED.locusleads;ALL.DBP.HEAVYvsLIGHT.COMBINED.locusleads
rs11605229	11:69308071:C_T	MYEOV	known	10784	11	69308071	t	c	0.1148	-0.1295	0.04163	0.00186621	-0.08211	0.05139	0.110092	-0.001733	58.906	1.617e-13	2.36994e-10	1125650	754663	------	-+--+-	10	0.8431	ALL.DBP.CURDRINK.COMBINED.locusleads	288.1	ALL.DBP.CURDRINK.COMBINED.locusleads;ALL.DBP.CURDRINK.COMBINED.regionleads;ALL.DBP.CURDRINK.FEMALE.locusleads;ALL.DBP.CURDRINK.FEMALE.regionleads;ALL.DBP.CURDRINK.MALE.locusleads;ALL.DBP.CURDRINK.MALE.regionleads;ALL.DBP.HEAVYvsLIGHT.COMBINED.locusleads;ALL.DBP.HEAVYvsLIGHT.COMBINED.regionleads;ALL.DBP.LIGHTvsNEVER.COMBINED.locusleads;ALL.DBP.LIGHTvsNEVER.COMBINED.regionleads;ALL.SBP.CURDRINK.COM…
rs6087848	20:32250245:A_G	POFUT1	known	11581	20	32250245	a	g	0.4186	-0.05308	0.03136	0.0905312	-0.05865	0.03701	0.113033	-0.0009818	34.875	2.673e-08	1.23968e-05	971835	690314	-+----	-++-++	10	0.5342	ALL.DBP.CURDRINK.COMBINED.locusleads	270.2	ALL.DBP.CURDRINK.COMBINED.locusleads
rs7182776	15:72170490:C_T	GRAMD2	known	0	15	72170490	t	c	0.2579	-0.07558	0.02927	0.00981823	-0.05765	0.03651	0.114332	-0.0008564	43.84	3.022e-10	2.30835e-07	1144930	763819	-++-+-	++----	10	0.2349	ALL.DBP.CURDRINK.COMBINED.locusleads	143.2	ALL.DBP.CURDRINK.COMBINED.locusleads;ALL.DBP.HEAVYvsLIGHT.COMBINED.locusleads;ALL.DBP.LIGHTvsNEVER.COMBINED.locusleads;ALL.DBP.LIGHTvsNEVER.COMBINED.regionleads;EUR.DBP.CURDRINK.COMBINED.locusleads
rs67070774	3:49862917:A_G	CAMKV	known	0	3	49862917	a	g	0.1288	-0.2625	0.04787	4.16753e-08	0.08832	0.05599	0.114698	-0.00229	65.832	5.067e-15	9.71677e-12	961792	683950	-+?---	+-?+++	8	0.8286	ALL.DBP.CURDRINK.COMBINED.locusleads	169.2	ALL.DBP.CURDRINK.COMBINED.locusleads;ALL.DBP.CURDRINK.MALE.locusleads;ALL.DBP.HEAVYvsLIGHT.COMBINED.locusleads;ALL.DBP.HEAVYvsLIGHT.FEMALE.locusleads;ALL.DBP.LIGHTvsNEVER.COMBINED.locusleads;ALL.SBP.CURDRINK.COMBINED.locusleads;ALL.SBP.CURDRINK.COMBINED.regionleads;ALL.SBP.CURDRINK.MALE.locusleads;ALL.SBP.CURDRINK.MALE.regionleads;ALL.SBP.HEAVYvsLIGHT.COMBINED.locusleads;ALL.SBP.HEAVYvsLIGHT.MALE…
rs513069	11:122143358:A_G	MIR100HG	known	0	11	122143358	a	g	0.3302	0.05732	0.02775	0.0388676	0.05383	0.03415	0.114961	-0.0007698	35.381	2.075e-08	9.93011e-06	1147120	765100	++-++-	++++-+	10	0.01756	ALL.DBP.CURDRINK.COMBINED.locusleads	309.3	ALL.DBP.CURDRINK.COMBINED.locusleads
rs10828269	10:18149643:C_G	CACNB2	known	0	10	18149643	c	g	0.4644	0.1174	0.02625	7.73535e-06	0.05073	0.03219	0.115036	-0.0006885	101.094	1.116e-22	5.86351e-19	1147160	765123	+-++++	++++--	10	0.6711	ALL.DBP.CURDRINK.COMBINED.locusleads	34.3	ALL.DBP.CURDRINK.COMBINED.locusleads;ALL.DBP.CURDRINK.FEMALE.locusleads;ALL.DBP.CURDRINK.MALE.locusleads;ALL.DBP.HEAVYvsLIGHT.COMBINED.locusleads;ALL.DBP.HEAVYvsLIGHT.FEMALE.locusleads;ALL.DBP.HEAVYvsLIGHT.MALE.locusleads;ALL.DBP.LIGHTvsNEVER.COMBINED.locusleads;ALL.DBP.LIGHTvsNEVER.FEMALE.locusleads;ALL.PP.CURDRINK.COMBINED.locusleads;ALL.PP.HEAVYvsLIGHT.COMBINED.locusleads;ALL.SBP.CURDRINK.COMB…
rs57496258	10:73973394:C_T	VCL	known	-24719	10	73973394	t	c	0.2226	0.1835	0.03603	3.52482e-07	-0.07005	0.04448	0.115288	-0.001298	44.814	1.856e-10	1.55524e-07	1147120	765104	++++++	-++---	10	0.3135	ALL.PP.CURDRINK.COMBINED.locusleads	137.4	ALL.PP.CURDRINK.COMBINED.locusleads;ALL.PP.HEAVYvsLIGHT.COMBINED.locusleads
rs2728457	8:76808191:A_G	ZFHX4	known	0	8	76808191	a	g	0.6196	0.1945	0.04722	3.80491e-05	0.109	0.0693	0.115749	-0.002227	52.653	3.687e-12	1.54932e-08	354493	191710	+++++	+++--	8	0.5543	ALL.PP.HEAVYvsNEVER.COMBINED.locusleads	68.5	ALL.PP.CURDRINK.COMBINED.locusleads;ALL.PP.CURDRINK.COMBINED.regionleads;ALL.PP.HEAVYvsLIGHT.COMBINED.locusleads;ALL.PP.HEAVYvsLIGHT.COMBINED.regionleads;ALL.PP.HEAVYvsNEVER.COMBINED.locusleads;ALL.PP.HEAVYvsNEVER.COMBINED.regionleads;ALL.SBP.CURDRINK.COMBINED.locusleads;EUR.PP.CURDRINK.COMBINED.locusleads;EUR.PP.CURDRINK.COMBINED.regionleads;EUR.PP.HEAVYvsLIGHT.COMBINED.locusleads;EUR.PP.HEAVYvs…
rs12637184	3:169769649:A_G	ACTRT3	known	0	3	169769649	a	g	0.2929	-0.3462	0.04993	4.09953e-12	0.0965	0.06141	0.116089	-0.002487	96.04	1.397e-21	5.34428e-18	1143940	763969	------	-+++++	10	0.9582	ALL.SBP.CURDRINK.COMBINED.locusleads	61.4	ALL.DBP.CURDRINK.COMBINED.locusleads;ALL.PP.CURDRINK.COMBINED.locusleads;ALL.PP.CURDRINK.COMBINED.regionleads;ALL.PP.CURDRINK.MALE.locusleads;ALL.PP.CURDRINK.MALE.regionleads;ALL.PP.HEAVYvsLIGHT.COMBINED.locusleads;ALL.PP.HEAVYvsLIGHT.COMBINED.regionleads;ALL.PP.HEAVYvsLIGHT.MALE.locusleads;ALL.PP.HEAVYvsLIGHT.MALE.regionleads;ALL.PP.LIGHTvsNEVER.MALE.locusleads;ALL.PP.LIGHTvsNEVER.MALE.regionlea…
rs12156251	8:11426026:A_G	C8orf12,FAM167A	known	0	8	11426026	a	g	0.8608	0.3144	0.0705	8.21225e-06	-0.1315	0.08369	0.116119	-0.004949	35.769	1.709e-08	8.15237e-06	1137610	764000	++++++	-+----	10	0.8816	ALL.SBP.CURDRINK.COMBINED.locusleads	97.41	ALL.SBP.CURDRINK.COMBINED.locusleads
rs17055919	18:74913678:C_T	ZNF407	known	0	18	74913678	t	c	0.8584	-0.1848	0.03591	2.65818e-07	0.07064	0.04503	0.11671	-0.001289	44.086	2.672e-10	2.0637e-07	1146910	764929	------	++-+--	10	0.8183	ALL.DBP.CURDRINK.COMBINED.locusleads	470.1	ALL.DBP.CURDRINK.COMBINED.locusleads;ALL.DBP.CURDRINK.COMBINED.regionleads
rs12542987	8:142908756:G_T	CYP11B2	known	-1802	8	142908756	t	g	0.102	0.4419	0.0701	2.90338e-10	-0.1567	0.1001	0.117481	-0.004905	55.523	8.776e-13	1.00446e-09	1120740	749337	+++++-	----++	10	0.6727	ALL.SBP.CURDRINK.COMBINED.locusleads	111.2	ALL.DBP.LIGHTvsNEVER.COMBINED.locusleads;ALL.SBP.CURDRINK.COMBINED.locusleads;ALL.SBP.CURDRINK.MALE.locusleads
rs2322633	6:80136272:C_T	BCKDHB	known	0	6	80136272	t	c	0.4817	-0.0681	0.0267	0.0107549	-0.05092	0.03255	0.117732	-0.0007121	47.164	5.735e-11	5.05629e-08	1147220	765150	----+-	+-----	10	0.55	ALL.DBP.CURDRINK.COMBINED.regionleads	420.1	ALL.DBP.CURDRINK.COMBINED.locusleads;ALL.DBP.CURDRINK.COMBINED.regionleads;ALL.DBP.CURDRINK.MALE.locusleads;ALL.DBP.CURDRINK.MALE.regionleads;ALL.DBP.HEAVYvsLIGHT.COMBINED.locusleads;ALL.DBP.HEAVYvsLIGHT.COMBINED.regionleads;ALL.DBP.LIGHTvsNEVER.MALE.locusleads;ALL.DBP.LIGHTvsNEVER.MALE.regionleads;EUR.DBP.HEAVYvsLIGHT.COMBINED.locusleads;EUR.DBP.HEAVYvsLIGHT.COMBINED.regionleads
rs62642497	11:130914679:C_T	SNX19	known	0	11	130914679	t	c	0.2037	0.73	0.1185	7.259e-10	-0.2731	0.1747	0.117994	-0.01397	50.388	2.094e-11	8.36724e-06	78266	33753	++++++++--+++++++++	---+--+-++--------+	36	0.8415	AFR.PP.CURDRINK.COMBINED.locusleads	4.7	AFR.PP.CURDRINK.COMBINED.locusleads;AFR.PP.CURDRINK.COMBINED.regionleads;ALL.PP.CURDRINK.COMBINED.locusleads
rs55653899	6:51766191:C_T	PKHD1	known	0	6	51766191	t	c	0.2577	0.06996	0.03925	0.0746807	0.07032	0.04503	0.118376	-0.00154	43.517	1.275e-08	7.32637e-06	840883	635870	-+-++-++++-++++++++----+--++++-++++---+++-++++--+++-??-+-+++-+-	-++--+-+--+-+---+-++++++++-++-++-+-+-----+---+-+---+??+-++-+++-	120	0.6823	EUR.DBP.CURDRINK.COMBINED.locusleads	124.6	ALL.DBP.CURDRINK.COMBINED.locusleads;ALL.DBP.HEAVYvsLIGHT.COMBINED.locusleads;EUR.DBP.CURDRINK.COMBINED.locusleads;EUR.DBP.HEAVYvsLIGHT.COMBINED.locusleads
rs17080102	6:150683634:C_G	PLEKHG1	known	0	6	150683634	c	g	0.0685	-0.7977	0.0855	1.06046e-20	0.1651	0.1058	0.118644	-0.007304	189.665	6.529e-42	1.53927e-37	1138630	761390	------	+-+-++	10	0.007873	ALL.SBP.CURDRINK.COMBINED.locusleads	48.1	ALL.DBP.CURDRINK.COMBINED.locusleads;ALL.DBP.CURDRINK.COMBINED.regionleads;ALL.DBP.CURDRINK.FEMALE.locusleads;ALL.DBP.CURDRINK.FEMALE.regionleads;ALL.DBP.CURDRINK.MALE.locusleads;ALL.DBP.CURDRINK.MALE.regionleads;ALL.DBP.HEAVYvsLIGHT.COMBINED.locusleads;ALL.DBP.HEAVYvsLIGHT.COMBINED.regionleads;ALL.DBP.HEAVYvsLIGHT.FEMALE.locusleads;ALL.DBP.HEAVYvsLIGHT.FEMALE.regionleads;ALL.DBP.HEAVYvsLIGHT.MAL…
rs1896341	12:114980205:C_T	TBX3	known	296041	12	114980205	t	c	0.5119	0.1914	0.04204	5.29349e-06	-0.07437	0.04779	0.119665	-0.001767	47.13	2.708e-09	1.77809e-06	843538	637833	-+---+++-+++---++++++++++--+-+++--+--+++-++++++++++-+-++++-++-+	+-+++--+------+----------++-+---++-+++--+----++--+++-+---+--++-	124	0.2117	EUR.PP.CURDRINK.COMBINED.locusleads	28.12	ALL.DBP.CURDRINK.COMBINED.locusleads;ALL.PP.CURDRINK.COMBINED.locusleads;ALL.SBP.CURDRINK.COMBINED.locusleads;EUR.PP.CURDRINK.COMBINED.locusleads
rs6021247	20:51492442:A_G	NFATC2	known	0	20	51492442	a	g	0.563	0.3027	0.04533	2.42726e-11	-0.08586	0.05519	0.119775	-0.002052	91.609	1.281e-20	4.41785e-17	1140530	761104	-+++++	+---+-	10	0.08511	ALL.SBP.CURDRINK.COMBINED.regionleads	138.1	ALL.DBP.CURDRINK.COMBINED.locusleads;ALL.DBP.CURDRINK.COMBINED.regionleads;ALL.DBP.CURDRINK.FEMALE.locusleads;ALL.DBP.CURDRINK.FEMALE.regionleads;ALL.DBP.CURDRINK.MALE.locusleads;ALL.DBP.CURDRINK.MALE.regionleads;ALL.DBP.HEAVYvsLIGHT.COMBINED.locusleads;ALL.DBP.HEAVYvsLIGHT.COMBINED.regionleads;ALL.DBP.LIGHTvsNEVER.COMBINED.locusleads;ALL.DBP.LIGHTvsNEVER.COMBINED.regionleads;ALL.DBP.LIGHTvsNEVER…
rs7167767	15:80733414:A_G	ABHD17C	known	0	15	80733414	a	g	0.675	0.1261	0.04772	0.0082297	0.09027	0.05803	0.119809	-0.002276	49.734	1.586e-11	1.44164e-08	1147500	766056	++-++-	+--+-+	10	0.003093	ALL.SBP.CURDRINK.COMBINED.locusleads	51.3	ALL.DBP.CURDRINK.COMBINED.locusleads;ALL.DBP.HEAVYvsLIGHT.COMBINED.locusleads;ALL.DBP.LIGHTvsNEVER.COMBINED.locusleads;ALL.SBP.CURDRINK.COMBINED.locusleads;ALL.SBP.HEAVYvsLIGHT.COMBINED.locusleads;ALL.SBP.LIGHTvsNEVER.COMBINED.locusleads
rs1873164	2:178888822:A_G	CCDC141	known	0	2	178888822	a	g	0.7438	-0.1417	0.02609	5.59765e-08	-0.07984	0.05133	0.119845	-0.0006797	54.566	1.416e-12	1.64862e-09	753218	209086	+--+-	++---	8	0.002092	ALL.DBP.HEAVYvsLIGHT.COMBINED.locusleads	112.3	ALL.DBP.CURDRINK.COMBINED.locusleads;ALL.DBP.CURDRINK.FEMALE.locusleads;ALL.DBP.HEAVYvsLIGHT.COMBINED.locusleads;EUR.DBP.CURDRINK.COMBINED.locusleads;EUR.DBP.HEAVYvsLIGHT.COMBINED.locusleads
rs67214975	10:18438322:A_C	CACNB2	known	0	10	18438322	a	c	0.4076	-0.2297	0.0464	7.40493e-07	-0.08739	0.05622	0.120082	-0.00215	123.579	1.462e-27	1.19657e-23	1146360	765047	------	+++-+-	10	0.04449	ALL.SBP.CURDRINK.COMBINED.locusleads	34.2	ALL.DBP.CURDRINK.COMBINED.locusleads;ALL.DBP.CURDRINK.FEMALE.locusleads;ALL.DBP.CURDRINK.MALE.locusleads;ALL.DBP.HEAVYvsLIGHT.COMBINED.locusleads;ALL.DBP.HEAVYvsLIGHT.FEMALE.locusleads;ALL.DBP.HEAVYvsLIGHT.MALE.locusleads;ALL.DBP.HEAVYvsNEVER.COMBINED.locusleads;ALL.DBP.LIGHTvsNEVER.COMBINED.locusleads;ALL.PP.CURDRINK.COMBINED.locusleads;ALL.PP.HEAVYvsLIGHT.COMBINED.locusleads;ALL.SBP.CURDRINK.CO…
rs9340788	6:151822254:A_C	ESR1	known	0	6	151822254	a	c	0.0636	-0.2276	0.05308	1.80397e-05	-0.1674	0.1077	0.120109	-0.002814	36.109	1.442e-08	6.70195e-06	645413	176955	-?-+?	+?--?	4	0.7092	ALL.PP.HEAVYvsLIGHT.COMBINED.locusleads	44.5	ALL.PP.CURDRINK.COMBINED.locusleads;ALL.PP.HEAVYvsLIGHT.COMBINED.locusleads;ALL.SBP.CURDRINK.COMBINED.locusleads
rs9471008	6:39217706:A_G	KCNK5	known	0	6	39217706	a	g	0.1384	-0.2828	0.06157	4.36613e-06	0.1085	0.06997	0.120982	-0.00379	48.508	1.529e-09	1.07784e-06	839378	634596	-+--+---+-+-+--+?-+--+--+?+-+-+-+---+++++-----+++--+??-+--+----	+-++-+++-+-+-+--?+--+-++-?-+++-+---+--+--++-++---++-??++++-++-+	116	0.902	EUR.PP.CURDRINK.COMBINED.locusleads	474.2	EUR.PP.CURDRINK.COMBINED.locusleads;EUR.PP.CURDRINK.COMBINED.regionleads
rs82164	19:3097872:C_T	GNA11	known	0	19	3097872	t	c	0.4087	-0.2271	0.05217	1.3424e-05	0.09582	0.06189	0.121567	-0.002719	34.328	3.514e-08	1.54656e-05	1068300	736944	-+---+	+-+++-	10	0.8926	ALL.SBP.CURDRINK.COMBINED.regionleads	717.1	ALL.SBP.CURDRINK.COMBINED.locusleads;ALL.SBP.CURDRINK.COMBINED.regionleads
rs60776549	5:3714531:A_G	IRX1	known	113128	5	3714531	a	g	0.7582	-0.1541	0.02486	5.69268e-10	-0.07601	0.04914	0.12191	-0.0006175	67.844	1.853e-15	3.97156e-12	749893	208310	---+-	-+--+	8	0.5807	ALL.DBP.HEAVYvsLIGHT.COMBINED.regionleads	230.1	ALL.DBP.CURDRINK.COMBINED.locusleads;ALL.DBP.CURDRINK.COMBINED.regionleads;ALL.DBP.CURDRINK.FEMALE.locusleads;ALL.DBP.CURDRINK.FEMALE.regionleads;ALL.DBP.CURDRINK.MALE.locusleads;ALL.DBP.CURDRINK.MALE.regionleads;ALL.DBP.HEAVYvsLIGHT.COMBINED.locusleads;ALL.DBP.HEAVYvsLIGHT.COMBINED.regionleads;ALL.DBP.HEAVYvsLIGHT.MALE.locusleads;ALL.DBP.HEAVYvsLIGHT.MALE.regionleads;ALL.DBP.LIGHTvsNEVER.COMBINE…
rs80077929	7:46054491:C_T	IGFBP3	known	133219	7	46054491	t	c	0.1033	-0.3424	0.06599	2.11807e-07	0.118	0.07632	0.122075	-0.004352	60.98	5.734e-14	8.65602e-11	943773	678842	--?---	++?+++	8	0.01219	ALL.PP.CURDRINK.COMBINED.locusleads	5.5	ALL.PP.CURDRINK.COMBINED.locusleads;ALL.PP.CURDRINK.MALE.locusleads;ALL.PP.HEAVYvsLIGHT.COMBINED.locusleads;EUR.PP.CURDRINK.COMBINED.locusleads;EUR.PP.HEAVYvsLIGHT.COMBINED.locusleads
rs421435	2:163947442:A_G	FIGN	known	211439	2	163947442	a	g	0.3947	0.1509	0.04522	0.000846822	0.08584	0.0556	0.122616	-0.002044	64.574	9.506e-15	1.50774e-11	1139150	762188	--++++	-+-+++	10	0.01701	ALL.SBP.CURDRINK.COMBINED.locusleads	18.5	ALL.SBP.CURDRINK.COMBINED.locusleads;ALL.SBP.CURDRINK.MALE.locusleads;ALL.SBP.HEAVYvsLIGHT.COMBINED.locusleads;ALL.SBP.HEAVYvsLIGHT.MALE.locusleads;ALL.SBP.LIGHTvsNEVER.COMBINED.locusleads
rs13107325	4:102267552:C_T	SLC39A8	known	0	4	102267552	t	c	0.0655	-0.3923	0.06483	1.43761e-09	-0.1186	0.07692	0.123107	-0.0042	188.043	1.469e-41	2.54309e-37	920537	662326	-+?--?	+-?--?	6	0.7791	ALL.DBP.CURDRINK.COMBINED.locusleads	49.1	ALL.DBP.CURDRINK.COMBINED.locusleads;ALL.DBP.CURDRINK.COMBINED.regionleads;ALL.DBP.CURDRINK.FEMALE.locusleads;ALL.DBP.CURDRINK.FEMALE.regionleads;ALL.DBP.CURDRINK.MALE.locusleads;ALL.DBP.CURDRINK.MALE.regionleads;ALL.DBP.HEAVYvsLIGHT.COMBINED.locusleads;ALL.DBP.HEAVYvsLIGHT.COMBINED.regionleads;ALL.DBP.HEAVYvsLIGHT.MALE.locusleads;ALL.DBP.HEAVYvsLIGHT.MALE.regionleads;ALL.DBP.HEAVYvsNEVER.COMBINE…
rs58020660	11:77897508:A_T	INTS4	known	0	11	77897508	a	t	0.8722	-0.1185	0.03805	0.00184367	-0.07417	0.04811	0.123153	-0.001446	52.379	4.227e-12	4.70397e-09	1092260	721386	+-----	-++---	10	0.01627	ALL.DBP.CURDRINK.COMBINED.regionleads	354.1	ALL.DBP.CURDRINK.COMBINED.locusleads;ALL.DBP.CURDRINK.COMBINED.regionleads;ALL.DBP.CURDRINK.MALE.locusleads;ALL.DBP.CURDRINK.MALE.regionleads;ALL.DBP.HEAVYvsLIGHT.COMBINED.locusleads;ALL.DBP.HEAVYvsLIGHT.COMBINED.regionleads;EUR.DBP.CURDRINK.COMBINED.locusleads;EUR.DBP.CURDRINK.COMBINED.regionleads;EUR.DBP.CURDRINK.MALE.locusleads;EUR.DBP.CURDRINK.MALE.regionleads;EUR.DBP.HEAVYvsLIGHT.COMBINED.lo…
rs74385561	11:47449501:C_T	RAPSN	known	323	11	47449501	t	c	0.0983	-0.3388	0.0876	0.000109921	-0.1564	0.1015	0.123344	-0.007654	106.185	8.753e-24	4.45704e-20	1042380	726628	-+---+	+---+-	10	0.9546	ALL.SBP.CURDRINK.COMBINED.locusleads	67.4	ALL.DBP.CURDRINK.COMBINED.locusleads;ALL.DBP.HEAVYvsLIGHT.COMBINED.locusleads;ALL.PP.CURDRINK.COMBINED.locusleads;ALL.SBP.CURDRINK.COMBINED.locusleads;ALL.SBP.CURDRINK.FEMALE.locusleads;ALL.SBP.HEAVYvsLIGHT.COMBINED.locusleads;EUR.SBP.CURDRINK.COMBINED.locusleads
rs6504411	17:48594792:C_T	HOXB-AS3	known	0	17	48594792	t	c	0.1302	-0.2547	0.06173	3.69075e-05	-0.1204	0.07822	0.123744	-0.003807	77.741	1.314e-17	3.16533e-14	1146350	764880	++---+	------	10	0.2962	ALL.SBP.CURDRINK.COMBINED.locusleads	41.1	ALL.PP.CURDRINK.COMBINED.locusleads;ALL.PP.CURDRINK.FEMALE.locusleads;ALL.PP.CURDRINK.FEMALE.regionleads;ALL.PP.CURDRINK.MALE.locusleads;ALL.PP.HEAVYvsLIGHT.COMBINED.locusleads;ALL.PP.HEAVYvsLIGHT.MALE.locusleads;ALL.PP.HEAVYvsLIGHT.MALE.regionleads;ALL.PP.HEAVYvsNEVER.COMBINED.locusleads;ALL.PP.HEAVYvsNEVER.COMBINED.regionleads;ALL.PP.LIGHTvsNEVER.COMBINED.locusleads;ALL.PP.LIGHTvsNEVER.MALE.loc…
rs2011605	4:15189003:A_G	CPEB2	known	118850	4	15189003	a	g	0.3885	0.1815	0.04222	1.7164e-05	-0.07645	0.04967	0.123766	-0.00178	34.399	3.392e-08	4.34795e-05	554442	394265	++-+++	--+-++	10	0.9883	ALL.DBP.CURDRINK.MALE.regionleads	335.3	ALL.DBP.CURDRINK.MALE.locusleads;ALL.DBP.CURDRINK.MALE.regionleads
rs6932503	6:109286755:A_G	CCDC162P	known	-7547	6	109286755	a	g	0.4923	-0.1022	0.0221	3.75622e-06	-0.06562	0.04266	0.123997	-0.0004875	42.49	5.934e-10	3.73437e-07	709333	204809	+----	---++	8	0.3449	ALL.DBP.HEAVYvsLIGHT.COMBINED.regionleads	497.1	ALL.DBP.CURDRINK.COMBINED.locusleads;ALL.DBP.CURDRINK.COMBINED.regionleads;ALL.DBP.HEAVYvsLIGHT.COMBINED.locusleads;ALL.DBP.HEAVYvsLIGHT.COMBINED.regionleads
rs11602680	11:69286465:A_G	MYEOV	known	-7689	11	69286465	a	g	0.7026	0.08759	0.02971	0.00319666	0.05673	0.03692	0.1244	-0.0008797	51.353	7.06e-12	7.4588e-09	1147790	765975	--++++	++-+--	10	0.1598	ALL.DBP.CURDRINK.COMBINED.locusleads	288.2	ALL.DBP.CURDRINK.COMBINED.locusleads;ALL.DBP.HEAVYvsLIGHT.COMBINED.locusleads;ALL.SBP.CURDRINK.COMBINED.locusleads;EUR.DBP.HEAVYvsLIGHT.COMBINED.locusleads;EUR.DBP.HEAVYvsLIGHT.COMBINED.regionleads;EUR.SBP.CURDRINK.COMBINED.locusleads
rs12930850	16:81568607:A_G	CMIP	known	0	16	81568607	a	g	0.5528	-0.09486	0.02856	0.000895579	-0.05281	0.03437	0.124412	-0.0008143	70.087	6.037e-16	1.39419e-12	1145260	764205	-----+	++---+	10	0.1328	ALL.DBP.CURDRINK.COMBINED.regionleads	217.1	ALL.DBP.CURDRINK.COMBINED.locusleads;ALL.DBP.CURDRINK.COMBINED.regionleads;ALL.DBP.CURDRINK.MALE.locusleads;ALL.DBP.CURDRINK.MALE.regionleads;ALL.DBP.HEAVYvsLIGHT.COMBINED.locusleads;ALL.DBP.HEAVYvsLIGHT.COMBINED.regionleads;ALL.DBP.HEAVYvsLIGHT.MALE.locusleads;ALL.DBP.HEAVYvsLIGHT.MALE.regionleads;ALL.DBP.LIGHTvsNEVER.COMBINED.locusleads;ALL.DBP.LIGHTvsNEVER.COMBINED.regionleads;ALL.DBP.LIGHTvsN…
rs13428381	2:43210883:A_G	ZFP36L2	known	-11518	2	43210883	a	g	0.4127	0.08957	0.02956	0.00244466	0.0547	0.03562	0.124623	-0.0008727	61.499	4.422e-14	7.12356e-11	1088620	721189	+++++-	--+++-	10	0.4689	ALL.DBP.CURDRINK.COMBINED.locusleads	135.4	ALL.DBP.CURDRINK.COMBINED.locusleads;ALL.DBP.CURDRINK.MALE.locusleads;ALL.DBP.CURDRINK.MALE.regionleads;ALL.DBP.HEAVYvsLIGHT.COMBINED.locusleads;ALL.DBP.HEAVYvsLIGHT.MALE.locusleads;ALL.DBP.HEAVYvsLIGHT.MALE.regionleads;ALL.DBP.LIGHTvsNEVER.COMBINED.locusleads;ALL.DBP.LIGHTvsNEVER.MALE.locusleads;ALL.DBP.LIGHTvsNEVER.MALE.regionleads;ALL.SBP.CURDRINK.COMBINED.locusleads;EUR.DBP.CURDRINK.COMBINED.…
rs17558745	1:218375179:C_T	TGFB2	known	0	1	218375179	t	c	0.2805	0.09223	0.03049	0.00248694	0.05648	0.03678	0.124632	-0.000929	61.216	5.096e-14	8.11454e-11	1149440	767842	--+++-	++++++	10	0.06216	ALL.DBP.CURDRINK.COMBINED.regionleads	272.1	ALL.DBP.CURDRINK.COMBINED.locusleads;ALL.DBP.CURDRINK.COMBINED.regionleads;ALL.DBP.CURDRINK.MALE.locusleads;ALL.DBP.CURDRINK.MALE.regionleads;ALL.DBP.HEAVYvsLIGHT.COMBINED.locusleads;ALL.DBP.HEAVYvsLIGHT.COMBINED.regionleads;EUR.DBP.CURDRINK.COMBINED.locusleads;EUR.DBP.CURDRINK.COMBINED.regionleads;EUR.DBP.HEAVYvsLIGHT.COMBINED.locusleads;EUR.DBP.HEAVYvsLIGHT.COMBINED.regionleads
rs13161518	5:88673697:C_T	LINC00461	known	0	5	88673697	t	c	0.8016	-0.09598	0.03326	0.00390484	-0.06526	0.04255	0.125097	-0.001106	45.168	1.555e-10	1.26093e-07	1080460	715185	++---+	----+-	10	0.9805	ALL.DBP.CURDRINK.COMBINED.locusleads	447.1	ALL.DBP.CURDRINK.COMBINED.locusleads;ALL.DBP.CURDRINK.COMBINED.regionleads;ALL.DBP.HEAVYvsLIGHT.COMBINED.locusleads;ALL.SBP.CURDRINK.COMBINED.locusleads;ALL.SBP.CURDRINK.COMBINED.regionleads
rs11909120	21:28759550:A_T	N6AMT1	known	-112640	21	28759550	a	t	0.84	-0.2423	0.03996	1.33138e-09	0.07663	0.05	0.125374	-0.001596	66.952	2.895e-15	5.28052e-12	1146920	764926	------	+++++-	10	0.07339	ALL.PP.CURDRINK.COMBINED.regionleads	236.1	ALL.PP.CURDRINK.COMBINED.locusleads;ALL.PP.CURDRINK.COMBINED.regionleads;ALL.PP.CURDRINK.FEMALE.locusleads;ALL.PP.CURDRINK.FEMALE.regionleads;ALL.PP.CURDRINK.MALE.locusleads;ALL.PP.CURDRINK.MALE.regionleads;ALL.PP.HEAVYvsLIGHT.COMBINED.locusleads;ALL.PP.HEAVYvsLIGHT.COMBINED.regionleads;ALL.PP.HEAVYvsLIGHT.FEMALE.locusleads;ALL.PP.HEAVYvsLIGHT.FEMALE.regionleads;ALL.PP.LIGHTvsNEVER.COMBINED.locus…
rs7696431	4:168766574:G_T	PALLD	known	0	4	168766574	t	g	0.4889	0.162	0.03062	1.21876e-07	0.05756	0.03756	0.125404	-0.0009366	129.304	8.356e-29	5.72229e-25	1147050	765085	+-++++	--++++	10	0.2418	ALL.PP.CURDRINK.COMBINED.regionleads	81.1	ALL.PP.CURDRINK.COMBINED.locusleads;ALL.PP.CURDRINK.COMBINED.regionleads;ALL.PP.CURDRINK.FEMALE.locusleads;ALL.PP.CURDRINK.FEMALE.regionleads;ALL.PP.CURDRINK.MALE.locusleads;ALL.PP.CURDRINK.MALE.regionleads;ALL.PP.HEAVYvsLIGHT.COMBINED.locusleads;ALL.PP.HEAVYvsLIGHT.COMBINED.regionleads;ALL.PP.HEAVYvsLIGHT.FEMALE.locusleads;ALL.PP.HEAVYvsLIGHT.FEMALE.regionleads;ALL.PP.HEAVYvsLIGHT.MALE.locuslead…
rs6756167	2:175133099:A_T	ATF2	known	0	2	175133099	a	t	0.7452	-0.1641	0.03614	5.60744e-06	0.06812	0.04454	0.126162	-0.001304	34.107	3.925e-08	1.93477e-05	1094580	723461	-----+	--++--	10	0.3941	ALL.PP.CURDRINK.COMBINED.locusleads	228.6	ALL.PP.CURDRINK.COMBINED.locusleads
rs10883543	10:100792995:G_T	PAX2	known	0	10	100792995	t	g	0.8931	0.2594	0.08859	0.00341045	0.158	0.1034	0.126501	-0.007847	69.734	7.203e-16	1.38184e-12	960585	685878	+-?+++	-+?++-	8	0.9624	ALL.SBP.CURDRINK.COMBINED.locusleads	220.1	ALL.DBP.CURDRINK.COMBINED.locusleads;ALL.DBP.CURDRINK.COMBINED.regionleads;ALL.DBP.CURDRINK.FEMALE.locusleads;ALL.DBP.CURDRINK.FEMALE.regionleads;ALL.DBP.CURDRINK.MALE.locusleads;ALL.DBP.HEAVYvsLIGHT.COMBINED.locusleads;ALL.DBP.HEAVYvsLIGHT.COMBINED.regionleads;ALL.DBP.HEAVYvsLIGHT.FEMALE.locusleads;ALL.DBP.HEAVYvsLIGHT.FEMALE.regionleads;ALL.DBP.HEAVYvsNEVER.COMBINED.locusleads;ALL.DBP.HEAVYvsNE…
rs74358828	7:92600969:A_G	CDK6	known	-3951	7	92600969	a	g	0.055	-0.2892	0.05609	2.52282e-07	-0.167	0.1093	0.126536	-0.003144	50.231	1.237e-11	1.22455e-08	711138	198302	----+	++-+-	8	0.1958	ALL.PP.HEAVYvsLIGHT.COMBINED.locusleads	38.4	ALL.PP.CURDRINK.COMBINED.locusleads;ALL.PP.CURDRINK.MALE.locusleads;ALL.PP.HEAVYvsLIGHT.COMBINED.locusleads;EUR.PP.HEAVYvsLIGHT.COMBINED.locusleads
rs10048404	18:56911251:C_T	WDR7	known	0	18	56911251	t	c	0.3295	-0.1439	0.05191	0.0055695	-0.09532	0.06239	0.12656	-0.002692	55.171	1.046e-12	1.17838e-09	1073460	719321	-?--++	+?---+	8	0.2673	ALL.SBP.CURDRINK.COMBINED.regionleads	325.1	ALL.DBP.CURDRINK.COMBINED.locusleads;ALL.DBP.CURDRINK.COMBINED.regionleads;ALL.DBP.HEAVYvsLIGHT.COMBINED.locusleads;ALL.DBP.HEAVYvsLIGHT.COMBINED.regionleads;ALL.SBP.CURDRINK.COMBINED.locusleads;ALL.SBP.CURDRINK.COMBINED.regionleads;ALL.SBP.CURDRINK.FEMALE.locusleads;ALL.SBP.CURDRINK.FEMALE.regionleads;ALL.SBP.HEAVYvsLIGHT.COMBINED.locusleads;ALL.SBP.HEAVYvsLIGHT.COMBINED.regionleads;ALL.SBP.HEAV…
rs36092215	8:141357146:A_G	GPR20	known	0	8	141357146	a	g	0.0559	-0.1966	0.06317	0.00185675	-0.1199	0.07859	0.1271	-0.003983	55.096	1.087e-12	1.37168e-09	947302	675267	-+?---	++?--+	8	0.2576	ALL.DBP.CURDRINK.COMBINED.regionleads	326.1	ALL.DBP.CURDRINK.COMBINED.locusleads;ALL.DBP.CURDRINK.COMBINED.regionleads;ALL.DBP.CURDRINK.MALE.locusleads;ALL.DBP.CURDRINK.MALE.regionleads;ALL.DBP.HEAVYvsLIGHT.COMBINED.locusleads;ALL.DBP.HEAVYvsLIGHT.COMBINED.regionleads;ALL.DBP.HEAVYvsNEVER.COMBINED.locusleads;ALL.DBP.HEAVYvsNEVER.COMBINED.regionleads;ALL.DBP.LIGHTvsNEVER.COMBINED.locusleads;ALL.DBP.LIGHTvsNEVER.COMBINED.regionleads;ALL.SBP.…
rs4858757	3:20075547:G_T	KAT2B	known	0	3	20075547	t	g	0.57	0.2891	0.04641	4.68641e-10	-0.1372	0.09014	0.12799	-0.002151	42.643	5.498e-10	1.00022e-06	437751	127030	++++-	-----	8	0.5265	ALL.SBP.HEAVYvsLIGHT.MALE.regionleads	494.1	ALL.SBP.CURDRINK.COMBINED.locusleads;ALL.SBP.CURDRINK.COMBINED.regionleads;ALL.SBP.CURDRINK.MALE.locusleads;ALL.SBP.CURDRINK.MALE.regionleads;ALL.SBP.HEAVYvsLIGHT.COMBINED.locusleads;ALL.SBP.HEAVYvsLIGHT.COMBINED.regionleads;ALL.SBP.HEAVYvsLIGHT.MALE.locusleads;ALL.SBP.HEAVYvsLIGHT.MALE.regionleads
rs7264882	20:10495952:A_G	SLX4IP	known	0	20	10495952	a	g	0.1859	0.08513	0.0418	0.0416899	0.0741	0.04876	0.128589	-0.001745	44.116	2.633e-10	2.03632e-07	967521	688651	++-++-	--++++	10	0.4479	ALL.DBP.CURDRINK.COMBINED.locusleads	20.21	ALL.DBP.CURDRINK.COMBINED.locusleads;ALL.DBP.HEAVYvsLIGHT.COMBINED.locusleads
rs34928451	8:8525829:C_G	SGK223	known	143995	8	8525829	c	g	0.2864	0.1646	0.0717	0.0216944	0.1287	0.08469	0.128596	-0.005098	45.516	1.307e-10	2.08796e-07	626540	453207	+++++	-+++-	8	0.4734	ALL.SBP.LIGHTvsNEVER.COMBINED.locusleads	97.2	ALL.SBP.CURDRINK.COMBINED.locusleads;ALL.SBP.LIGHTvsNEVER.COMBINED.locusleads
rs1437405	2:20729307:C_T	C2orf43	known	0	2	20729307	t	c	0.6813	0.08227	0.03305	0.012801	0.06182	0.0407	0.128783	-0.001091	42.787	5.116e-10	3.91334e-07	1137510	761874	+--++-	--+++-	10	0.03238	ALL.PP.CURDRINK.COMBINED.locusleads	120.2	ALL.PP.CURDRINK.COMBINED.locusleads;ALL.PP.HEAVYvsLIGHT.COMBINED.locusleads
rs604723	11:100739815:C_T	ARHGAP42	known	0	11	100739815	t	c	0.3102	-0.2602	0.02932	7.02556e-19	-0.054	0.03591	0.132643	-0.0008576	305.683	4.186e-67	1.5323e-61	1138020	762034	-+----	+-+-++	10	0.4371	ALL.DBP.CURDRINK.COMBINED.locusleads	17.1	ALL.DBP.CURDRINK.COMBINED.locusleads;ALL.DBP.CURDRINK.COMBINED.regionleads;ALL.DBP.CURDRINK.FEMALE.locusleads;ALL.DBP.CURDRINK.FEMALE.regionleads;ALL.DBP.CURDRINK.MALE.locusleads;ALL.DBP.CURDRINK.MALE.regionleads;ALL.DBP.HEAVYvsLIGHT.COMBINED.locusleads;ALL.DBP.HEAVYvsLIGHT.COMBINED.regionleads;ALL.DBP.HEAVYvsLIGHT.FEMALE.locusleads;ALL.DBP.HEAVYvsLIGHT.FEMALE.regionleads;ALL.DBP.HEAVYvsLIGHT.MAL…
rs1854556	9:71171194:A_C	TRPM3	novel-T3	49596	9	71171194	a	c	0.5775	-0.1363	0.02371	8.99698e-09	0.06654	0.04435	0.133527	-0.000562	36.521	1.174e-08	5.12463e-06	694392	201585	----+	+++-+	8	0.476	ALL.DBP.HEAVYvsLIGHT.COMBINED.locusleads	632.1	ALL.DBP.HEAVYvsLIGHT.COMBINED.locusleads;ALL.DBP.HEAVYvsLIGHT.COMBINED.regionleads
rs10015716	4:94627399:A_G	PDLIM5	known	0	4	94627399	a	g	0.6414	0.4393	0.1254	0.000459722	-0.199	0.1329	0.134298	-0.01574	42.229	2.632e-09	8.88385e-06	240613	212807	-++++-+-+++-+--+-++-+??+-	++---+-+---+--+-+--+-??-+	44	0.9491	EUR.PP.LIGHTvsNEVER.MALE.regionleads	549.1	ALL.PP.HEAVYvsLIGHT.COMBINED.locusleads;ALL.PP.HEAVYvsLIGHT.COMBINED.regionleads;ALL.PP.LIGHTvsNEVER.MALE.locusleads;ALL.PP.LIGHTvsNEVER.MALE.regionleads;EUR.PP.LIGHTvsNEVER.MALE.locusleads;EUR.PP.LIGHTvsNEVER.MALE.regionleads
rs3811953	5:32783603:C_T	NPR3	known	0	5	32783603	t	c	0.2196	0.186	0.05268	0.000414381	0.09659	0.06452	0.134379	-0.002773	69.873	6.719e-16	1.29627e-12	1151150	768190	+-++++	-+++++	10	0.401	ALL.SBP.CURDRINK.COMBINED.locusleads	7.6	ALL.DBP.CURDRINK.COMBINED.locusleads;ALL.DBP.HEAVYvsLIGHT.COMBINED.locusleads;ALL.PP.CURDRINK.COMBINED.locusleads;ALL.PP.CURDRINK.MALE.locusleads;ALL.PP.HEAVYvsLIGHT.COMBINED.locusleads;ALL.PP.HEAVYvsLIGHT.MALE.locusleads;ALL.SBP.CURDRINK.COMBINED.locusleads;ALL.SBP.CURDRINK.FEMALE.locusleads;ALL.SBP.CURDRINK.MALE.locusleads;ALL.SBP.HEAVYvsLIGHT.COMBINED.locusleads;ALL.SBP.HEAVYvsLIGHT.MALE.locus…
rs6445597	3:53700504:A_G	CACNA1D	known	0	3	53700504	a	g	0.3171	0.1921	0.02282	3.82788e-17	-0.0678	0.04532	0.134646	-0.0005203	80.919	2.684e-18	8.17948e-15	751320	208596	+++++	+---+	8	0.485	ALL.DBP.HEAVYvsLIGHT.COMBINED.locusleads	50.4	ALL.DBP.CURDRINK.COMBINED.locusleads;ALL.DBP.CURDRINK.FEMALE.locusleads;ALL.DBP.CURDRINK.MALE.locusleads;ALL.DBP.HEAVYvsLIGHT.COMBINED.locusleads;ALL.DBP.HEAVYvsLIGHT.FEMALE.locusleads;ALL.DBP.HEAVYvsLIGHT.MALE.locusleads;ALL.DBP.HEAVYvsLIGHT.MALE.regionleads;ALL.DBP.LIGHTvsNEVER.COMBINED.locusleads;ALL.SBP.CURDRINK.COMBINED.locusleads;ALL.SBP.CURDRINK.FEMALE.locusleads;ALL.SBP.HEAVYvsLIGHT.COMBI…
rs2808454	1:207058406:A_T	PFKFB2	known	0	1	207058406	a	t	0.4815	0.09455	0.02172	1.34207e-05	0.06414	0.04288	0.134705	-0.0004708	37.323	7.86e-09	3.59598e-06	750561	208479	+++-+	++++-	8	0.4518	ALL.DBP.HEAVYvsLIGHT.COMBINED.regionleads	606.1	ALL.DBP.HEAVYvsLIGHT.COMBINED.locusleads;ALL.DBP.HEAVYvsLIGHT.COMBINED.regionleads;ALL.DBP.HEAVYvsLIGHT.FEMALE.locusleads;ALL.DBP.HEAVYvsLIGHT.FEMALE.regionleads
rs762395	21:43349796:A_G	LINC00322	known	17757	21	43349796	a	g	0.3359	-0.1093	0.02448	8.01177e-06	-0.07229	0.04835	0.134878	-0.0005992	38.918	4.884e-08	2.56931e-05	594070	166776	--+++-+++??-+------++--??-+?--++?+--+--?-?-+-?+-+--+-??+--	++---+---??+-++-+----++??+-?++--?-+--++?+?+-+?-++----??+-+	92	0.7635	EUR.DBP.HEAVYvsLIGHT.COMBINED.locusleads	259.5	EUR.DBP.HEAVYvsLIGHT.COMBINED.locusleads
rs77924615	16:20381010:A_G	PDILT	known	0	16	20381010	a	g	0.187	-0.1472	0.03485	2.402e-05	-0.06286	0.04221	0.136429	-0.001214	95.339	1.984e-21	9.04752e-18	1142860	763406	--+---	++---+	10	0.318	ALL.DBP.CURDRINK.COMBINED.locusleads	130.1	ALL.DBP.CURDRINK.COMBINED.locusleads;ALL.DBP.CURDRINK.COMBINED.regionleads;ALL.DBP.CURDRINK.FEMALE.locusleads;ALL.DBP.CURDRINK.FEMALE.regionleads;ALL.DBP.CURDRINK.MALE.locusleads;ALL.DBP.CURDRINK.MALE.regionleads;ALL.DBP.HEAVYvsLIGHT.COMBINED.locusleads;ALL.DBP.HEAVYvsLIGHT.COMBINED.regionleads;ALL.DBP.HEAVYvsLIGHT.FEMALE.locusleads;ALL.DBP.HEAVYvsLIGHT.FEMALE.regionleads;ALL.DBP.HEAVYvsLIGHT.MAL…
rs17627481	12:111339678:A_G	CUX2	known	0	12	111339678	a	g	0.049	-0.2258	0.05209	1.45889e-05	-0.1529	0.1027	0.136539	-0.002712	37.112	8.734e-09	3.9482e-06	653850	179122	-?--+	+?-++	6	0.6549	ALL.DBP.HEAVYvsLIGHT.COMBINED.locusleads	13.13	ALL.DBP.CURDRINK.COMBINED.locusleads;ALL.DBP.HEAVYvsLIGHT.COMBINED.locusleads
rs72658305	4:80241223:A_G	FGF5	known	-25364	4	80241223	a	g	0.0857	-0.1341	0.04806	0.00526654	-0.08684	0.05833	0.136548	-0.002309	52.295	4.409e-12	4.88894e-09	1134700	762082	-+----	+-----	10	0.2873	ALL.DBP.CURDRINK.COMBINED.locusleads	2.5	ALL.DBP.CURDRINK.COMBINED.locusleads;ALL.DBP.HEAVYvsLIGHT.COMBINED.locusleads;ALL.SBP.CURDRINK.COMBINED.locusleads;ALL.SBP.HEAVYvsLIGHT.COMBINED.locusleads
rs2300481	2:66555335:C_T	MEIS1	known	0	2	66555335	t	c	0.3674	0.1614	0.03612	7.87926e-06	0.1082	0.07273	0.136832	-0.001303	38.154	5.186e-09	2.49632e-06	750565	208486	-++++	++++-	8	0.4867	ALL.SBP.HEAVYvsLIGHT.COMBINED.locusleads	585.1	ALL.SBP.CURDRINK.COMBINED.locusleads;ALL.SBP.CURDRINK.COMBINED.regionleads;ALL.SBP.HEAVYvsLIGHT.COMBINED.locusleads;ALL.SBP.HEAVYvsLIGHT.COMBINED.regionleads
rs11023909	11:16307389:A_G	SOX6	known	0	11	16307389	a	g	0.8	-0.309	0.05419	1.18299e-08	-0.09914	0.06667	0.137008	-0.002933	142.063	1.417e-31	1.68814e-27	1149340	767722	-+----	-----+	10	0.9361	ALL.SBP.CURDRINK.COMBINED.regionleads	71.1	ALL.DBP.CURDRINK.COMBINED.locusleads;ALL.DBP.CURDRINK.COMBINED.regionleads;ALL.DBP.CURDRINK.FEMALE.locusleads;ALL.DBP.CURDRINK.FEMALE.regionleads;ALL.DBP.CURDRINK.MALE.locusleads;ALL.DBP.CURDRINK.MALE.regionleads;ALL.DBP.HEAVYvsLIGHT.COMBINED.locusleads;ALL.DBP.HEAVYvsLIGHT.COMBINED.regionleads;ALL.DBP.HEAVYvsLIGHT.FEMALE.locusleads;ALL.DBP.HEAVYvsLIGHT.FEMALE.regionleads;ALL.DBP.HEAVYvsLIGHT.MAL…
rs12993460	2:28380770:A_C	FLJ31356	known	-3638	2	28380770	a	c	0.4929	-0.1439	0.04712	0.00225884	-0.08485	0.05707	0.137075	-0.002217	59.418	1.252e-13	1.66321e-10	1150760	767975	-+--+-	--+---	10	0.02211	ALL.SBP.CURDRINK.COMBINED.regionleads	283.1	ALL.PP.CURDRINK.COMBINED.locusleads;ALL.PP.CURDRINK.COMBINED.regionleads;ALL.PP.HEAVYvsLIGHT.COMBINED.locusleads;ALL.PP.HEAVYvsLIGHT.COMBINED.regionleads;ALL.SBP.CURDRINK.COMBINED.locusleads;ALL.SBP.CURDRINK.COMBINED.regionleads;ALL.SBP.CURDRINK.MALE.locusleads;ALL.SBP.CURDRINK.MALE.regionleads;ALL.SBP.HEAVYvsLIGHT.COMBINED.locusleads;ALL.SBP.HEAVYvsLIGHT.COMBINED.regionleads;ALL.SBP.HEAVYvsLIGHT…
NA	9:133261730:C_G	ABO	known	0	9	133261730	c	g	0.4034	0.1283	0.02159	2.80595e-09	-0.06305	0.04245	0.137471	-0.0004652	38.471	4.428e-09	2.1723e-06	753973	209145	+++-+	-----	8	0.2228	ALL.DBP.HEAVYvsLIGHT.COMBINED.locusleads	144.5	ALL.DBP.CURDRINK.COMBINED.locusleads;ALL.DBP.HEAVYvsLIGHT.COMBINED.locusleads
rs7208925	17:49402529:C_G	PHB	known	-1518	17	49402529	c	g	0.6988	0.0818	0.02905	0.00486507	0.0529	0.03562	0.137512	-0.0008424	50.273	1.212e-11	1.22364e-08	1148240	766106	-++++-	+--+--	10	0.3644	ALL.DBP.CURDRINK.COMBINED.locusleads	41.19	ALL.DBP.CURDRINK.COMBINED.locusleads;ALL.DBP.HEAVYvsLIGHT.COMBINED.locusleads
rs12364607	11:130245851:A_G	ZBTB44	known	0	11	130245851	a	g	0.0789	0.2788	0.04774	5.22113e-09	-0.1374	0.09255	0.137649	-0.002278	37.282	8.021e-09	3.97855e-06	702029	196701	--+-+	---+-	8	0.1287	ALL.PP.HEAVYvsLIGHT.COMBINED.locusleads	4.13	ALL.PP.CURDRINK.COMBINED.locusleads;ALL.PP.HEAVYvsLIGHT.COMBINED.locusleads;EUR.PP.CURDRINK.COMBINED.locusleads;EUR.PP.HEAVYvsLIGHT.COMBINED.locusleads
rs55715427	22:42062823:C_G	NAGA	known	0	22	42062823	c	g	0.0839	-0.2243	0.1026	0.0288039	-0.1761	0.1187	0.137922	-0.01053	49.83	1.512e-11	1.37954e-08	938486	672063	+-?---	--?---	8	0.9982	ALL.SBP.CURDRINK.COMBINED.locusleads	381.1	ALL.PP.CURDRINK.COMBINED.locusleads;ALL.PP.CURDRINK.COMBINED.regionleads;ALL.SBP.CURDRINK.COMBINED.locusleads;ALL.SBP.CURDRINK.COMBINED.regionleads;ALL.SBP.HEAVYvsLIGHT.COMBINED.locusleads;ALL.SBP.HEAVYvsLIGHT.COMBINED.regionleads;ALL.SBP.LIGHTvsNEVER.COMBINED.locusleads;ALL.SBP.LIGHTvsNEVER.COMBINED.regionleads;EUR.SBP.CURDRINK.COMBINED.locusleads;EUR.SBP.CURDRINK.COMBINED.regionleads;EUR.SBP.HE…
rs76569060	2:59819119:C_T	LOC101927285	known	539719	2	59819119	t	c	0.0376	-0.4613	0.1077	1.84229e-05	0.1835	0.1239	0.138598	-0.0116	39.055	3.306e-09	2.14251e-06	899821	656339	+??---	-??+++	6	0.6416	ALL.PP.CURDRINK.COMBINED.regionleads	412.3	ALL.PP.CURDRINK.COMBINED.locusleads;ALL.PP.CURDRINK.COMBINED.regionleads;ALL.PP.CURDRINK.FEMALE.locusleads;ALL.PP.CURDRINK.FEMALE.regionleads
rs904018	8:11759007:C_T	GATA4	known	0	8	11759007	t	c	0.3644	0.09519	0.04561	0.0368843	0.08244	0.05574	0.139138	-0.002067	34.165	3.812e-08	1.66317e-05	1148390	766177	+-++++	+-++++	10	0.843	ALL.SBP.CURDRINK.COMBINED.locusleads	97.43	ALL.DBP.HEAVYvsLIGHT.COMBINED.locusleads;ALL.SBP.CURDRINK.COMBINED.locusleads
rs760909898	6:51583374:T_TG	PKHD1	known	-31972	6	51583374	t	tg	0.3707	0.06686	0.02848	0.0188942	0.05227	0.03537	0.13946	-0.0008099	37.596	6.858e-09	3.7185e-06	1050570	692844	+?++++	-?+++-	8	0.4071	ALL.DBP.CURDRINK.COMBINED.locusleads	124.5	ALL.DBP.CURDRINK.COMBINED.locusleads;ALL.DBP.HEAVYvsLIGHT.MALE.locusleads;EUR.DBP.CURDRINK.MALE.locusleads
rs117703053	12:70158859:A_G	LOC101928062	known	-63331	12	70158859	a	g	0.1103	0.2471	0.05088	1.19464e-06	-0.08821	0.05971	0.139593	-0.002587	49.277	1.993e-11	1.92055e-08	948154	679881	+-?+++	--?--+	8	0.7571	ALL.DBP.CURDRINK.COMBINED.regionleads	393.1	ALL.DBP.CURDRINK.COMBINED.locusleads;ALL.DBP.CURDRINK.COMBINED.regionleads;ALL.DBP.CURDRINK.FEMALE.locusleads;ALL.DBP.CURDRINK.FEMALE.regionleads;ALL.DBP.HEAVYvsLIGHT.COMBINED.locusleads;ALL.DBP.HEAVYvsLIGHT.FEMALE.locusleads;ALL.DBP.HEAVYvsLIGHT.FEMALE.regionleads;ALL.SBP.CURDRINK.COMBINED.locusleads;ALL.SBP.CURDRINK.COMBINED.regionleads;ALL.SBP.CURDRINK.FEMALE.locusleads;ALL.SBP.CURDRINK.FEMALE…
rs733177	1:207873039:A_G	CD34	known	-13498	1	207873039	a	g	0.6606	0.216	0.03372	1.49687e-10	-0.06007	0.04072	0.14016	-0.001136	87.318	1.095e-19	3.3607e-16	1147140	765116	+++++-	+-+--+	10	0.4199	ALL.PP.CURDRINK.COMBINED.locusleads	147.1	ALL.PP.CURDRINK.COMBINED.locusleads;ALL.PP.CURDRINK.COMBINED.regionleads;ALL.PP.CURDRINK.FEMALE.locusleads;ALL.PP.CURDRINK.MALE.locusleads;ALL.PP.CURDRINK.MALE.regionleads;ALL.PP.HEAVYvsLIGHT.COMBINED.locusleads;ALL.PP.HEAVYvsLIGHT.COMBINED.regionleads;ALL.PP.HEAVYvsLIGHT.MALE.locusleads;ALL.PP.HEAVYvsLIGHT.MALE.regionleads;ALL.PP.LIGHTvsNEVER.COMBINED.locusleads;ALL.PP.LIGHTvsNEVER.COMBINED.regi…
rs12924781	16:83006942:A_T	CDH13	known	0	16	83006942	a	t	0.862	-0.102	0.05058	0.0437365	-0.09082	0.06161	0.140452	-0.002557	34.046	4.046e-08	1.98615e-05	1007090	659923	-?----	+?--+-	8	0.6719	ALL.PP.CURDRINK.COMBINED.locusleads	37.9	ALL.PP.CURDRINK.COMBINED.locusleads
rs2249883	1:67829225:A_G	GNG12	known	0	1	67829225	a	g	0.7063	0.1459	0.02969	8.91855e-07	-0.05283	0.0359	0.141132	-0.0008806	45.264	1.483e-10	1.20706e-07	1145650	764868	+-++++	+---+-	10	0.007006	ALL.DBP.CURDRINK.COMBINED.regionleads	445.1	ALL.DBP.CURDRINK.COMBINED.locusleads;ALL.DBP.CURDRINK.COMBINED.regionleads;EUR.DBP.CURDRINK.COMBINED.locusleads;EUR.DBP.CURDRINK.COMBINED.regionleads
rs11644048	16:29874377:A_G	SEZ6L2	known	0	16	29874377	a	g	0.6128	0.2468	0.03745	4.39471e-11	-0.1111	0.07558	0.141571	-0.001398	47.626	4.552e-11	3.47299e-08	745154	207323	+++++	-+-+-	8	0.4554	ALL.SBP.HEAVYvsLIGHT.COMBINED.locusleads	318.2	ALL.DBP.CURDRINK.COMBINED.locusleads;ALL.DBP.HEAVYvsLIGHT.COMBINED.locusleads;ALL.SBP.CURDRINK.COMBINED.locusleads;ALL.SBP.CURDRINK.MALE.locusleads;ALL.SBP.HEAVYvsLIGHT.COMBINED.locusleads;ALL.SBP.HEAVYvsLIGHT.COMBINED.regionleads;ALL.SBP.HEAVYvsLIGHT.MALE.locusleads;ALL.SBP.HEAVYvsLIGHT.MALE.regionleads;ALL.SBP.LIGHTvsNEVER.COMBINED.locusleads
rs34811474	4:25407216:A_G	ANAPC4	known	0	4	25407216	a	g	0.2044	-0.2007	0.04149	1.31608e-06	0.07071	0.04817	0.142124	-0.00172	51.474	6.646e-12	7.05734e-09	958619	682825	-??---	+??+++	6	0.7532	ALL.DBP.CURDRINK.COMBINED.locusleads	362.1	ALL.DBP.CURDRINK.COMBINED.locusleads;ALL.DBP.CURDRINK.COMBINED.regionleads;ALL.DBP.CURDRINK.MALE.locusleads;ALL.DBP.CURDRINK.MALE.regionleads;ALL.DBP.HEAVYvsLIGHT.COMBINED.locusleads;ALL.DBP.HEAVYvsLIGHT.COMBINED.regionleads;ALL.DBP.HEAVYvsLIGHT.MALE.locusleads;ALL.DBP.HEAVYvsLIGHT.MALE.regionleads;ALL.DBP.HEAVYvsNEVER.COMBINED.locusleads;ALL.DBP.HEAVYvsNEVER.COMBINED.regionleads;ALL.DBP.HEAVYvsN…
rs12476527	2:26692756:G_T	KCNK3	known	0	2	26692756	t	g	0.52	-0.609	0.04858	4.74202e-36	0.08846	0.06029	0.14231	-0.002355	366.751	2.296e-80	3.00177e-75	1072850	705144	-?----	+?++-+	8	0.1059	ALL.SBP.CURDRINK.COMBINED.locusleads	10.1	ALL.DBP.CURDRINK.COMBINED.locusleads;ALL.DBP.CURDRINK.COMBINED.regionleads;ALL.DBP.CURDRINK.FEMALE.locusleads;ALL.DBP.CURDRINK.FEMALE.regionleads;ALL.DBP.CURDRINK.MALE.locusleads;ALL.DBP.CURDRINK.MALE.regionleads;ALL.DBP.HEAVYvsLIGHT.COMBINED.locusleads;ALL.DBP.HEAVYvsLIGHT.COMBINED.regionleads;ALL.DBP.HEAVYvsLIGHT.FEMALE.locusleads;ALL.DBP.HEAVYvsLIGHT.FEMALE.regionleads;ALL.DBP.HEAVYvsLIGHT.MAL…
rs76824778	1:112696883:C_T	MOV10	known	0	1	112696883	t	c	0.9636	-0.5961	0.09234	1.07869e-10	0.156	0.1064	0.142603	-0.00852	110.506	1.009e-24	6.29522e-21	893846	656134	+?----	-?++++	8	0.8348	ALL.DBP.CURDRINK.COMBINED.locusleads	36.4	ALL.DBP.CURDRINK.COMBINED.locusleads;ALL.DBP.CURDRINK.FEMALE.locusleads;ALL.DBP.CURDRINK.MALE.locusleads;ALL.DBP.HEAVYvsLIGHT.COMBINED.locusleads;ALL.DBP.HEAVYvsLIGHT.FEMALE.locusleads;ALL.DBP.HEAVYvsLIGHT.MALE.locusleads;ALL.DBP.LIGHTvsNEVER.COMBINED.locusleads;ALL.SBP.CURDRINK.COMBINED.locusleads;ALL.SBP.CURDRINK.MALE.locusleads;ALL.SBP.HEAVYvsLIGHT.COMBINED.locusleads;ALL.SBP.HEAVYvsLIGHT.MALE…
rs3820201	1:53115998:A_G	SLC1A7	novel-T3	0	1	53115998	a	g	0.4564	-0.2352	0.0475	7.36137e-07	0.09131	0.06237	0.143193	-0.002252	37.084	8.859e-09	1.76228e-05	363346	192130	-----	+-+--	8	0.4654	ALL.DBP.HEAVYvsNEVER.COMBINED.locusleads	615.1	ALL.DBP.HEAVYvsNEVER.COMBINED.locusleads;ALL.DBP.HEAVYvsNEVER.COMBINED.regionleads
rs113086489	17:7268037:C_T	CLDN7	known	4844	17	7268037	t	c	0.5044	0.1862	0.04483	3.27473e-05	0.08028	0.05499	0.144317	-0.002009	87.104	1.218e-19	3.71899e-16	1145280	763492	-+++++	+--+++	10	0.06402	ALL.SBP.CURDRINK.COMBINED.regionleads	104.4	ALL.DBP.CURDRINK.COMBINED.locusleads;ALL.DBP.CURDRINK.MALE.locusleads;ALL.DBP.HEAVYvsLIGHT.COMBINED.locusleads;ALL.DBP.HEAVYvsLIGHT.MALE.locusleads;ALL.DBP.HEAVYvsNEVER.COMBINED.locusleads;ALL.DBP.HEAVYvsNEVER.COMBINED.regionleads;ALL.PP.CURDRINK.COMBINED.locusleads;ALL.PP.CURDRINK.MALE.locusleads;ALL.PP.HEAVYvsLIGHT.COMBINED.locusleads;ALL.PP.LIGHTvsNEVER.COMBINED.locusleads;ALL.SBP.CURDRINK.COM…
rs10736085	10:94133295:A_T	PLCE1	known	0	10	94133295	a	t	0.5038	0.2276	0.04449	3.12486e-07	0.07926	0.05438	0.144973	-0.001977	121.858	3.459e-27	2.66219e-23	1151070	768160	++++++	+--+--	10	0.7311	ALL.SBP.CURDRINK.COMBINED.locusleads	46.2	ALL.DBP.CURDRINK.COMBINED.locusleads;ALL.DBP.CURDRINK.FEMALE.locusleads;ALL.DBP.HEAVYvsLIGHT.COMBINED.locusleads;ALL.DBP.LIGHTvsNEVER.COMBINED.locusleads;ALL.PP.CURDRINK.COMBINED.locusleads;ALL.PP.CURDRINK.COMBINED.regionleads;ALL.PP.CURDRINK.FEMALE.locusleads;ALL.PP.CURDRINK.FEMALE.regionleads;ALL.PP.CURDRINK.MALE.locusleads;ALL.PP.HEAVYvsLIGHT.COMBINED.locusleads;ALL.PP.HEAVYvsLIGHT.COMBINED.re…
rs61466784	6:169230878:A_C	THBS2	known	0	6	169230878	a	c	0.1788	0.2367	0.04125	9.56983e-09	-0.07288	0.05001	0.145031	-0.001701	66.336	3.938e-15	7.05514e-12	1133980	760295	+++++-	------	10	0.3755	ALL.PP.CURDRINK.COMBINED.locusleads	85.6	ALL.PP.CURDRINK.COMBINED.locusleads;ALL.PP.CURDRINK.MALE.locusleads;ALL.PP.HEAVYvsLIGHT.COMBINED.locusleads;ALL.PP.LIGHTvsNEVER.COMBINED.locusleads
rs872998	10:103770732:C_G	SH3PXD2A	known	0	10	103770732	c	g	0.4517	-0.2452	0.04464	3.9554e-08	0.07926	0.05452	0.146008	-0.001991	58.149	2.361e-13	2.99251e-10	1148430	766185	------	+++++-	10	0.9304	ALL.SBP.CURDRINK.COMBINED.locusleads	8.4	ALL.DBP.CURDRINK.COMBINED.locusleads;ALL.DBP.CURDRINK.FEMALE.locusleads;ALL.DBP.LIGHTvsNEVER.COMBINED.locusleads;ALL.PP.CURDRINK.COMBINED.locusleads;ALL.SBP.CURDRINK.COMBINED.locusleads;ALL.SBP.CURDRINK.FEMALE.locusleads;ALL.SBP.LIGHTvsNEVER.COMBINED.locusleads;ALL.SBP.LIGHTvsNEVER.FEMALE.locusleads;EUR.SBP.CURDRINK.COMBINED.locusleads
rs2649599	1:1370113:A_G	AURKAIP1	known	-3616	1	1370113	a	g	0.3431	-0.3567	0.06078	4.39207e-09	0.1038	0.07142	0.14612	-0.003672	77.714	1.332e-17	7.359e-14	634377	444640	-?+---	-?-+++	8	0.4721	ALL.PP.CURDRINK.MALE.locusleads	171.2	ALL.PP.CURDRINK.COMBINED.locusleads;ALL.PP.CURDRINK.MALE.locusleads;ALL.PP.CURDRINK.MALE.regionleads;ALL.PP.HEAVYvsLIGHT.COMBINED.locusleads;ALL.PP.HEAVYvsLIGHT.MALE.locusleads;ALL.PP.LIGHTvsNEVER.COMBINED.locusleads;ALL.PP.LIGHTvsNEVER.MALE.locusleads;ALL.PP.LIGHTvsNEVER.MALE.regionleads;ALL.SBP.CURDRINK.COMBINED.locusleads;ALL.SBP.CURDRINK.MALE.locusleads;ALL.SBP.CURDRINK.MALE.regionleads;EUR.P…
rs2327429	6:133888699:C_T	EYA4-AS1	known	0	6	133888699	t	c	0.6884	0.2196	0.04797	4.69754e-06	-0.08571	0.05898	0.146167	-0.002298	36.026	1.503e-08	7.26855e-06	1148940	767689	++++++	++----	10	0.9897	ALL.SBP.CURDRINK.COMBINED.locusleads	569.2	ALL.SBP.CURDRINK.COMBINED.locusleads
rs71524263	7:18990655:C_T	HDAC9	known	0	7	18990655	t	c	0.1033	0.1438	0.05695	0.0115691	0.09722	0.06698	0.146647	-0.003241	52.949	3.179e-12	3.62405e-09	1135020	762000	++-+++	+--+--	10	0.2221	ALL.PP.CURDRINK.COMBINED.locusleads	9.4	ALL.PP.CURDRINK.COMBINED.locusleads;ALL.PP.HEAVYvsLIGHT.COMBINED.locusleads;ALL.PP.LIGHTvsNEVER.COMBINED.locusleads
rs134077	22:27667264:A_G	MN1	known	-81012	22	27667264	a	g	0.4281	0.07646	0.02657	0.00400609	0.04724	0.03255	0.146695	-0.0007052	51.367	7.011e-12	7.4117e-09	1147060	765082	++++++	+-+++-	10	0.9353	ALL.DBP.CURDRINK.COMBINED.locusleads	365.1	ALL.DBP.CURDRINK.COMBINED.locusleads;ALL.DBP.CURDRINK.COMBINED.regionleads;ALL.DBP.HEAVYvsLIGHT.COMBINED.locusleads;ALL.DBP.HEAVYvsLIGHT.COMBINED.regionleads;EUR.DBP.CURDRINK.COMBINED.locusleads;EUR.DBP.CURDRINK.COMBINED.regionleads;EUR.DBP.HEAVYvsLIGHT.COMBINED.locusleads;EUR.DBP.HEAVYvsLIGHT.COMBINED.regionleads
rs4285804	10:102626552:A_T	SUFU	known	0	10	102626552	a	t	0.4984	0.1149	0.02702	2.11486e-05	0.04768	0.03287	0.146902	-0.0007286	92.843	6.907e-21	2.96444e-17	1151090	768164	-+++++	++++-+	10	0.009241	ALL.DBP.CURDRINK.COMBINED.locusleads	8.3	ALL.DBP.CURDRINK.COMBINED.locusleads;ALL.DBP.CURDRINK.FEMALE.locusleads;ALL.DBP.CURDRINK.MALE.locusleads;ALL.DBP.HEAVYvsLIGHT.COMBINED.locusleads;ALL.DBP.HEAVYvsLIGHT.MALE.locusleads;ALL.DBP.LIGHTvsNEVER.COMBINED.locusleads;ALL.DBP.LIGHTvsNEVER.MALE.locusleads;ALL.PP.CURDRINK.COMBINED.locusleads;ALL.PP.HEAVYvsLIGHT.COMBINED.locusleads;ALL.PP.LIGHTvsNEVER.COMBINED.locusleads;ALL.SBP.CURDRINK.COMBI…
rs211285	10:32045303:C_T	KIF5B	known	0	10	32045303	t	c	0.7868	-0.2143	0.04398	1.101e-06	0.07471	0.05152	0.147026	-0.001933	50.705	9.762e-12	1.03026e-08	1065040	739837	-----+	+-+++-	10	0.2741	ALL.PP.CURDRINK.COMBINED.locusleads	336.2	ALL.PP.CURDRINK.COMBINED.locusleads;ALL.PP.CURDRINK.FEMALE.locusleads;ALL.PP.CURDRINK.FEMALE.regionleads;ALL.PP.HEAVYvsLIGHT.FEMALE.locusleads;EUR.PP.CURDRINK.FEMALE.locusleads;EUR.PP.CURDRINK.FEMALE.regionleads
rs10946818	6:26370778:A_G	BTN3A2	known	0	6	26370778	a	g	0.128	0.1861	0.03184	5.07027e-09	-0.0911	0.06284	0.147138	-0.001009	37.177	8.455e-09	3.83746e-06	751132	208482	+++++	+----	8	0.1358	ALL.DBP.HEAVYvsLIGHT.COMBINED.locusleads	39.23	ALL.DBP.CURDRINK.COMBINED.locusleads;ALL.DBP.HEAVYvsLIGHT.COMBINED.locusleads
rs113561401	12:20068582:A_G	LOC100506393	known	0	12	20068582	a	g	0.8619	0.1372	0.04631	0.0030501	0.07832	0.05407	0.147479	-0.002143	68.195	1.554e-15	3.30036e-12	966803	687929	+--+-+	-++++-	10	0.9398	ALL.DBP.CURDRINK.COMBINED.locusleads	35.4	ALL.DBP.CURDRINK.COMBINED.locusleads;ALL.DBP.CURDRINK.FEMALE.locusleads;ALL.DBP.HEAVYvsLIGHT.COMBINED.locusleads;ALL.DBP.HEAVYvsLIGHT.FEMALE.locusleads;ALL.DBP.LIGHTvsNEVER.COMBINED.locusleads
NA	6:25864654:C_G	SLC17A3	known	0	6	25864654	c	g	0.1216	-0.2752	0.05584	8.29199e-07	0.09183	0.06343	0.14769	-0.003096	59.002	2.126e-11	2.59189e-08	781557	589234	---+----?---++?+++?-?++-+?------???------------+---+------+---+	+-+--+-+?+-+--?+--?-?---+?++++++???+-++++++++-+--++-++++-+--+--	108	0.6294	EUR.DBP.CURDRINK.COMBINED.locusleads	39.18	ALL.DBP.CURDRINK.COMBINED.locusleads;ALL.DBP.HEAVYvsLIGHT.COMBINED.locusleads;ALL.DBP.LIGHTvsNEVER.COMBINED.locusleads;ALL.PP.CURDRINK.COMBINED.locusleads;ALL.PP.HEAVYvsLIGHT.COMBINED.locusleads;EUR.DBP.CURDRINK.COMBINED.locusleads
rs12616641	2:113321671:A_C	PAX8	known	42750	2	113321671	a	c	0.2053	-0.1565	0.0567	0.00577764	-0.09897	0.06854	0.148746	-0.003212	51.45	6.725e-12	6.51462e-09	1143910	764313	------	+++--+	10	0.5164	ALL.SBP.CURDRINK.COMBINED.locusleads	364.1	ALL.DBP.CURDRINK.COMBINED.locusleads;ALL.DBP.CURDRINK.COMBINED.regionleads;ALL.DBP.HEAVYvsLIGHT.COMBINED.locusleads;ALL.DBP.HEAVYvsLIGHT.COMBINED.regionleads;ALL.DBP.HEAVYvsLIGHT.FEMALE.locusleads;ALL.DBP.HEAVYvsLIGHT.FEMALE.regionleads;ALL.SBP.CURDRINK.COMBINED.locusleads;ALL.SBP.CURDRINK.COMBINED.regionleads;ALL.SBP.CURDRINK.MALE.locusleads;ALL.SBP.CURDRINK.MALE.regionleads;ALL.SBP.HEAVYvsLIGHT…
rs73354387	10:114121777:A_G	C10orf118	known	-437	10	114121777	a	g	0.7929	-0.06866	0.03452	0.0467021	-0.06011	0.04169	0.14935	-0.00119	34.151	3.838e-08	1.69673e-05	1091040	723173	+-----	-+--++	10	0.5309	ALL.DBP.CURDRINK.COMBINED.locusleads	56.11	ALL.DBP.CURDRINK.COMBINED.locusleads
rs1650555	5:158118268:C_G	LOC101927697	known	-202432	5	158118268	c	g	0.5885	0.05906	0.02744	0.0313712	0.04804	0.03333	0.149487	-0.0007521	36.475	1.201e-08	6.11819e-06	1147640	765908	--++--	++-+++	10	0.3799	ALL.DBP.CURDRINK.COMBINED.locusleads	60.16	ALL.DBP.CURDRINK.COMBINED.locusleads
rs7095351	10:19645445:A_G	MALRD1	known	0	10	19645445	a	g	0.5284	-0.2165	0.04581	2.28938e-06	0.07899	0.05481	0.149539	-0.002097	43.083	4.413e-10	7.57311e-07	604596	417668	-?----	-?++++	8	0.7984	ALL.PP.CURDRINK.MALE.regionleads	487.1	ALL.PP.CURDRINK.COMBINED.locusleads;ALL.PP.CURDRINK.COMBINED.regionleads;ALL.PP.CURDRINK.MALE.locusleads;ALL.PP.CURDRINK.MALE.regionleads;ALL.PP.HEAVYvsLIGHT.COMBINED.locusleads;ALL.PP.HEAVYvsLIGHT.COMBINED.regionleads;EUR.PP.CURDRINK.COMBINED.locusleads;EUR.PP.CURDRINK.COMBINED.regionleads;EUR.PP.CURDRINK.MALE.locusleads;EUR.PP.CURDRINK.MALE.regionleads
rs1436138	17:77320798:A_G	2009-09-01	known	0	17	77320798	a	g	0.6082	0.1162	0.02681	1.46289e-05	0.04751	0.033	0.149953	-0.0007178	90.757	1.961e-20	8.1088e-17	1145960	764796	+-++++	+++++-	10	0.8797	ALL.DBP.CURDRINK.COMBINED.locusleads	141.1	ALL.DBP.CURDRINK.COMBINED.locusleads;ALL.DBP.CURDRINK.COMBINED.regionleads;ALL.DBP.CURDRINK.FEMALE.locusleads;ALL.DBP.CURDRINK.FEMALE.regionleads;ALL.DBP.CURDRINK.MALE.locusleads;ALL.DBP.CURDRINK.MALE.regionleads;ALL.DBP.HEAVYvsLIGHT.COMBINED.locusleads;ALL.DBP.HEAVYvsLIGHT.COMBINED.regionleads;ALL.DBP.HEAVYvsLIGHT.FEMALE.locusleads;ALL.DBP.HEAVYvsLIGHT.FEMALE.regionleads;ALL.DBP.HEAVYvsLIGHT.MAL…
rs4480763	15:83280718:C_T	BNC1	known	0	15	83280718	t	c	0.199	-0.1918	0.03792	4.23639e-07	0.06458	0.04493	0.150619	-0.001437	53.254	2.73e-12	3.17658e-09	970275	689598	-+?---	+-?+-+	8	0.2324	ALL.DBP.CURDRINK.COMBINED.regionleads	344.1	ALL.DBP.CURDRINK.COMBINED.locusleads;ALL.DBP.CURDRINK.COMBINED.regionleads;ALL.DBP.CURDRINK.FEMALE.locusleads;ALL.DBP.CURDRINK.FEMALE.regionleads;EUR.DBP.CURDRINK.COMBINED.locusleads;EUR.DBP.CURDRINK.COMBINED.regionleads
rs56034078	1:47489841:G_T	FOXD2	known	49150	1	47489841	t	g	0.7822	0.1665	0.03146	1.20698e-07	-0.056	0.03898	0.150822	-0.0009886	50.85	9.081e-12	9.38515e-09	1140170	760857	++++++	+-----	10	0.4515	ALL.DBP.CURDRINK.COMBINED.locusleads	315.2	ALL.DBP.CURDRINK.COMBINED.locusleads
rs12266520	10:61823972:A_G	C10orf107	known	57639	10	61823972	a	g	0.2702	-0.06042	0.03349	0.0712124	-0.05685	0.03959	0.151011	-0.00112	33.796	4.584e-08	1.98243e-05	1065210	739696	-----+	--+-+-	10	0.1415	ALL.DBP.CURDRINK.COMBINED.locusleads	40.7	ALL.DBP.CURDRINK.COMBINED.locusleads
rs73840111	3:53522143:A_G	CACNA1D	known	0	3	53522143	a	g	0.6944	-0.3138	0.04753	4.05248e-11	0.08375	0.05834	0.15113	-0.002258	89.569	3.551e-20	1.15932e-16	1148250	766102	-+----	--++--	10	0.03514	ALL.SBP.CURDRINK.COMBINED.locusleads	50.3	ALL.DBP.CURDRINK.COMBINED.locusleads;ALL.DBP.HEAVYvsLIGHT.COMBINED.locusleads;ALL.DBP.HEAVYvsLIGHT.FEMALE.locusleads;ALL.DBP.HEAVYvsNEVER.COMBINED.locusleads;ALL.DBP.HEAVYvsNEVER.FEMALE.locusleads;ALL.DBP.LIGHTvsNEVER.COMBINED.locusleads;ALL.DBP.LIGHTvsNEVER.FEMALE.locusleads;ALL.PP.CURDRINK.COMBINED.locusleads;ALL.PP.CURDRINK.FEMALE.locusleads;ALL.SBP.CURDRINK.COMBINED.locusleads;ALL.SBP.CURDRIN…
rs2238613	19:2149830:A_G	AP3D1	known	0	19	2149830	a	g	0.9582	-0.4016	0.06316	2.03793e-10	0.1339	0.09335	0.151462	-0.003987	55.557	8.63e-13	1.07287e-09	1009710	678400	------	-+++++	10	0.4732	ALL.PP.CURDRINK.COMBINED.locusleads	16.5	ALL.PP.CURDRINK.COMBINED.locusleads;ALL.PP.HEAVYvsNEVER.COMBINED.locusleads;ALL.PP.LIGHTvsNEVER.COMBINED.locusleads
rs1541463	12:396593:A_G	CCDC77	known	0	12	396593	a	g	0.7317	-0.4558	0.08857	2.65799e-07	0.1625	0.1133	0.151502	-0.007839	43.624	3.366e-10	1.73491e-06	291207	178667	---+-	--+-+	8	0.6994	ALL.SBP.LIGHTvsNEVER.FEMALE.locusleads	481.1	ALL.PP.CURDRINK.COMBINED.locusleads;ALL.PP.CURDRINK.COMBINED.regionleads;ALL.PP.HEAVYvsLIGHT.COMBINED.locusleads;ALL.PP.HEAVYvsLIGHT.COMBINED.regionleads;ALL.PP.LIGHTvsNEVER.FEMALE.locusleads;ALL.PP.LIGHTvsNEVER.FEMALE.regionleads;ALL.SBP.LIGHTvsNEVER.FEMALE.locusleads;ALL.SBP.LIGHTvsNEVER.FEMALE.regionleads
rs150756637	7:45809643:A_G	SEPT7P2	known	40625	7	45809643	a	g	0.8505	0.1321	0.06738	0.0499348	0.1161	0.08104	0.151965	-0.004533	33.945	4.255e-08	4.37232e-05	578586	397136	+?-+-+	+?+++-	8	0.2134	ALL.PP.CURDRINK.MALE.locusleads	5.13	ALL.PP.CURDRINK.MALE.locusleads
rs7746179	6:126285194:A_G	CENPW	known	-54594	6	126285194	a	g	0.2037	0.1122	0.03222	0.000497109	0.0593	0.0415	0.153028	-0.001036	54.737	1.301e-12	1.61909e-09	1148180	766002	++++++	--++++	10	0.4471	ALL.DBP.CURDRINK.COMBINED.locusleads	21.6	ALL.DBP.CURDRINK.COMBINED.locusleads;ALL.DBP.CURDRINK.MALE.locusleads;ALL.DBP.HEAVYvsLIGHT.COMBINED.locusleads;ALL.DBP.HEAVYvsLIGHT.MALE.locusleads;ALL.DBP.LIGHTvsNEVER.COMBINED.locusleads;ALL.SBP.CURDRINK.COMBINED.locusleads;ALL.SBP.HEAVYvsLIGHT.COMBINED.locusleads
rs1716183	12:123150549:C_T	MPHOSPH9	known	-5846	12	123150549	t	c	0.1937	-0.08472	0.0382	0.0265684	-0.06541	0.04579	0.153154	-0.001452	39.247	3.004e-09	1.79709e-06	1138760	764230	+-+-+-	-+--+-	10	0.3166	ALL.DBP.CURDRINK.COMBINED.locusleads	184.2	ALL.DBP.CURDRINK.COMBINED.locusleads
rs7761562	6:165766548:A_G	PDE10A	known	104448	6	165766548	a	g	0.0807	-0.2281	0.04668	1.02665e-06	-0.0836	0.05862	0.15383	-0.002177	100.849	1.261e-22	6.5824e-19	1139530	762011	-+----	+---++	10	0.1096	ALL.DBP.CURDRINK.COMBINED.regionleads	119.1	ALL.DBP.CURDRINK.COMBINED.locusleads;ALL.DBP.CURDRINK.COMBINED.regionleads;ALL.DBP.CURDRINK.FEMALE.locusleads;ALL.DBP.CURDRINK.FEMALE.regionleads;ALL.DBP.CURDRINK.MALE.locusleads;ALL.DBP.CURDRINK.MALE.regionleads;ALL.DBP.HEAVYvsLIGHT.COMBINED.locusleads;ALL.DBP.HEAVYvsLIGHT.COMBINED.regionleads;ALL.DBP.HEAVYvsLIGHT.FEMALE.locusleads;ALL.DBP.HEAVYvsLIGHT.FEMALE.regionleads;ALL.DBP.HEAVYvsLIGHT.MAL…
rs12202886	6:169323002:A_G	THBS2	known	68888	6	169323002	a	g	0.6297	-0.1241	0.03813	0.0011353	-0.06378	0.04474	0.153993	-0.001452	74.511	6.608e-17	1.49469e-13	1135820	762349	-+---+	--+---	10	0.1493	ALL.PP.CURDRINK.COMBINED.locusleads	85.3	ALL.PP.CURDRINK.COMBINED.locusleads;ALL.PP.CURDRINK.FEMALE.locusleads;ALL.PP.CURDRINK.MALE.locusleads;ALL.PP.HEAVYvsLIGHT.COMBINED.locusleads;ALL.PP.HEAVYvsLIGHT.MALE.locusleads;ALL.PP.LIGHTvsNEVER.COMBINED.locusleads;ALL.PP.LIGHTvsNEVER.MALE.locusleads;ALL.SBP.CURDRINK.COMBINED.locusleads;ALL.SBP.CURDRINK.COMBINED.regionleads;ALL.SBP.HEAVYvsLIGHT.COMBINED.locusleads;ALL.SBP.HEAVYvsLIGHT.COMBINED…
rs2959002	15:74336633:A_G	CCDC33	known	492	15	74336633	a	g	0.3419	0.06741	0.02736	0.0137467	0.04828	0.03393	0.154757	-0.0007473	39.042	3.327e-09	1.96601e-06	1148410	766186	-++++-	+-++-+	10	0.6426	ALL.DBP.CURDRINK.COMBINED.locusleads	25.7	ALL.DBP.CURDRINK.COMBINED.locusleads
rs139462021	6:26196091:A_T	HIST1H3D	known	-692	6	26196091	a	t	0.043	0.1313	0.07266	0.070755	0.1214	0.08545	0.1554	-0.005263	34.291	3.58e-08	1.59729e-05	1086320	738334	++-++-	-+++-+	10	0.04902	ALL.DBP.CURDRINK.COMBINED.locusleads	39.26	ALL.DBP.CURDRINK.COMBINED.locusleads
rs10958723	8:42593045:C_T	SMIM19	known	40048	8	42593045	t	c	0.5326	0.06712	0.03034	0.0269486	0.05287	0.03722	0.15547	-0.0009203	35.829	1.659e-08	9.01645e-06	1147170	765129	-+++--	+--+--	10	0.06137	ALL.PP.CURDRINK.COMBINED.locusleads	117.3	ALL.PP.CURDRINK.COMBINED.locusleads
rs2378502	3:189585922:G_T	TP63	known	-45504	3	189585922	t	g	0.4525	-0.124	0.04458	0.00541056	-0.0773	0.05448	0.155937	-0.001986	48.91	2.396e-11	2.10557e-08	1147270	765168	-+----	----++	10	0.7297	ALL.SBP.CURDRINK.COMBINED.regionleads	398.1	ALL.DBP.CURDRINK.COMBINED.locusleads;ALL.DBP.CURDRINK.COMBINED.regionleads;ALL.DBP.HEAVYvsLIGHT.COMBINED.locusleads;ALL.DBP.HEAVYvsLIGHT.COMBINED.regionleads;ALL.SBP.CURDRINK.COMBINED.locusleads;ALL.SBP.CURDRINK.COMBINED.regionleads;ALL.SBP.HEAVYvsLIGHT.COMBINED.locusleads;ALL.SBP.HEAVYvsLIGHT.COMBINED.regionleads;EUR.DBP.CURDRINK.COMBINED.locusleads;EUR.DBP.CURDRINK.COMBINED.regionleads;EUR.DBP.…
rs11178059	12:70049704:C_T	LOC101928062	known	-172486	12	70049704	t	c	0.2841	-0.06914	0.02894	0.0168906	-0.05024	0.03547	0.156656	-0.0008366	39.418	2.757e-09	1.66601e-06	1147180	765128	++---+	----+-	10	0.8104	ALL.DBP.CURDRINK.COMBINED.locusleads	393.2	ALL.DBP.CURDRINK.COMBINED.locusleads;ALL.DBP.HEAVYvsLIGHT.COMBINED.locusleads;ALL.DBP.HEAVYvsLIGHT.COMBINED.regionleads
rs2852749	18:44651231:A_G	SETBP1	known	-28941	18	44651231	a	g	0.8163	0.2496	0.04466	2.28521e-08	0.1273	0.08991	0.156816	-0.001993	54.523	1.447e-12	1.50549e-09	748116	208090	+++++	+++++	8	0.9847	ALL.SBP.HEAVYvsLIGHT.COMBINED.locusleads	52.7	ALL.PP.CURDRINK.COMBINED.locusleads;ALL.PP.HEAVYvsLIGHT.COMBINED.locusleads;ALL.SBP.CURDRINK.COMBINED.locusleads;ALL.SBP.HEAVYvsLIGHT.COMBINED.locusleads;ALL.SBP.HEAVYvsLIGHT.COMBINED.regionleads;EUR.SBP.HEAVYvsLIGHT.COMBINED.locusleads
rs6077934	20:10851104:A_G	LOC101929413	known	-24228	20	10851104	a	g	0.1771	0.09638	0.03533	0.00637209	0.06074	0.0429	0.156819	-0.001248	48.984	2.308e-11	2.19375e-08	1139540	760637	++++++	+-++--	10	0.5994	ALL.DBP.CURDRINK.COMBINED.locusleads	20.19	ALL.DBP.CURDRINK.COMBINED.locusleads;ALL.DBP.HEAVYvsLIGHT.COMBINED.locusleads;EUR.DBP.CURDRINK.COMBINED.locusleads;EUR.DBP.HEAVYvsLIGHT.COMBINED.locusleads
rs2079147	7:92703061:A_G	CDK6	known	0	7	92703061	a	g	0.5753	-0.1109	0.03548	0.0017738	-0.05972	0.04219	0.156922	-0.001257	64.941	7.909e-15	1.36531e-11	1144650	764929	-++---	----++	10	0.004662	ALL.PP.CURDRINK.COMBINED.locusleads	38.3	ALL.PP.CURDRINK.COMBINED.locusleads;ALL.PP.CURDRINK.MALE.locusleads;ALL.PP.HEAVYvsLIGHT.COMBINED.locusleads
rs13049522	21:46311581:A_G	C21orf58	known	0	21	46311581	a	g	0.2236	0.1752	0.03761	3.18776e-06	-0.06715	0.04747	0.157192	-0.001413	35.556	1.901e-08	1.01833e-05	1139350	759882	+-++++	++----	10	0.5724	ALL.PP.CURDRINK.COMBINED.locusleads	651.2	ALL.PP.CURDRINK.COMBINED.locusleads;ALL.PP.CURDRINK.COMBINED.regionleads
rs59692843	4:137459766:C_T	PCDH18	known	-59153	4	137459766	t	c	0.114	0.2198	0.03398	9.89734e-11	-0.09653	0.06825	0.157257	-0.001154	46.168	9.435e-11	7.16408e-08	720097	200421	+-+++	-+-+-	8	0.7293	ALL.DBP.HEAVYvsLIGHT.COMBINED.locusleads	164.2	ALL.DBP.CURDRINK.COMBINED.locusleads;ALL.DBP.HEAVYvsLIGHT.COMBINED.locusleads;ALL.DBP.HEAVYvsLIGHT.COMBINED.regionleads;ALL.SBP.CURDRINK.COMBINED.locusleads;ALL.SBP.HEAVYvsLIGHT.COMBINED.locusleads;EUR.DBP.CURDRINK.COMBINED.locusleads;EUR.DBP.HEAVYvsLIGHT.COMBINED.locusleads;EUR.DBP.HEAVYvsLIGHT.COMBINED.regionleads
rs9318571	13:78663979:A_G	RNF219	known	4800	13	78663979	a	g	0.5653	-0.1794	0.04258	2.51727e-05	0.06844	0.04839	0.157262	-0.001812	40.909	3.571e-08	1.77321e-05	839659	634811	+---+-------++-+?------++-----+---+-++--++----++--+-??++++-----	-+++-+-++-+++-+-?+-+-++--++--+-+-+++--++--+-++---+-+??----+++++	118	0.1659	EUR.PP.CURDRINK.COMBINED.locusleads	720.1	EUR.PP.CURDRINK.COMBINED.locusleads;EUR.PP.CURDRINK.COMBINED.regionleads
rs17192565	12:90001825:C_T	LINC00936	known	289873	12	90001825	t	c	0.9641	0.254	0.1113	0.0224822	0.1812	0.1282	0.157533	-0.01239	52.036	5.017e-12	5.53629e-09	901136	657800	+??+-+	-??+++	6	0.9065	ALL.PP.CURDRINK.COMBINED.locusleads	3.7	ALL.PP.CURDRINK.COMBINED.locusleads;ALL.PP.HEAVYvsLIGHT.COMBINED.locusleads;ALL.SBP.CURDRINK.COMBINED.locusleads;ALL.SBP.HEAVYvsLIGHT.COMBINED.locusleads;ALL.SBP.HEAVYvsLIGHT.FEMALE.locusleads
rs62069912	17:66280654:C_T	PRKCA	known	-22153	17	66280654	t	c	0.1538	0.2839	0.06308	6.7751e-06	-0.1092	0.07738	0.158181	-0.003972	35.278	2.185e-08	1.013e-05	1141530	764279	+++++-	+---+-	10	0.1006	ALL.SBP.CURDRINK.COMBINED.regionleads	524.2	ALL.SBP.CURDRINK.COMBINED.locusleads;ALL.SBP.CURDRINK.COMBINED.regionleads
rs56298202	17:61404805:C_G	TBX2	known	0	17	61404805	c	g	0.6331	-0.2692	0.0843	0.00140629	-0.1423	0.1009	0.158449	-0.007101	64.865	8.218e-15	1.3161e-11	816068	542283	+?---+	-?+-+-	8	0.4665	ALL.SBP.CURDRINK.COMBINED.locusleads	59.3	ALL.DBP.CURDRINK.COMBINED.locusleads;ALL.DBP.LIGHTvsNEVER.COMBINED.locusleads;ALL.PP.CURDRINK.COMBINED.locusleads;ALL.PP.HEAVYvsLIGHT.COMBINED.locusleads;ALL.PP.LIGHTvsNEVER.COMBINED.locusleads;ALL.SBP.CURDRINK.COMBINED.locusleads;ALL.SBP.CURDRINK.FEMALE.locusleads;ALL.SBP.HEAVYvsLIGHT.COMBINED.locusleads;ALL.SBP.HEAVYvsLIGHT.FEMALE.locusleads;ALL.SBP.LIGHTvsNEVER.COMBINED.locusleads;ALL.SBP.LIGH…
rs11629120	14:22989248:C_T	C14orf93	known	0	14	22989248	t	c	0.5904	-0.1521	0.03545	1.78231e-05	0.05718	0.04055	0.158507	-0.001256	41.559	2.865e-08	1.48227e-05	838394	634458	-++---+-+--+++-+?--+------+-+--?++--++----+++-----+-??++--+-+--	++--++-+-+++--+-?++-++++-+---+-?++----++++---+++-+-+??---+----+	116	0.9798	EUR.DBP.CURDRINK.COMBINED.locusleads	57.5	ALL.DBP.CURDRINK.COMBINED.locusleads;EUR.DBP.CURDRINK.COMBINED.locusleads;EUR.DBP.CURDRINK.COMBINED.regionleads
rs7953774	12:46219950:C_T	SLC38A1	known	0	12	46219950	t	c	0.1561	-0.1105	0.03896	0.00456478	-0.07441	0.05278	0.158595	-0.001514	34.781	2.802e-08	1.43598e-05	1141400	760843	------	+-----	10	0.8404	ALL.PP.CURDRINK.COMBINED.regionleads	702.1	ALL.PP.CURDRINK.COMBINED.locusleads;ALL.PP.CURDRINK.COMBINED.regionleads;ALL.PP.HEAVYvsLIGHT.COMBINED.locusleads;ALL.PP.HEAVYvsLIGHT.COMBINED.regionleads
rs145086498	17:7330658:A_G	NEURL4	known	1339	17	7330658	a	g	0.0266	-0.8759	0.1871	2.84848e-06	0.3035	0.2154	0.158833	-0.03497	50.496	1.084e-11	1.01385e-08	875884	644065	-??--+	+??++-	6	0.5161	ALL.SBP.CURDRINK.COMBINED.locusleads	104.1	ALL.PP.CURDRINK.COMBINED.locusleads;ALL.SBP.CURDRINK.COMBINED.locusleads;ALL.SBP.CURDRINK.MALE.locusleads;ALL.SBP.HEAVYvsLIGHT.COMBINED.locusleads;EUR.DBP.CURDRINK.COMBINED.locusleads;EUR.SBP.CURDRINK.COMBINED.locusleads;EUR.SBP.HEAVYvsLIGHT.COMBINED.locusleads
rs17010961	4:85801950:A_T	ARHGAP24	known	0	4	85801950	a	t	0.1488	0.3769	0.05968	2.69553e-10	0.1045	0.0742	0.159026	-0.003559	158.724	3.416e-35	5.32743e-31	1143150	763681	++++-+	--+++-	10	0.01805	ALL.SBP.CURDRINK.COMBINED.locusleads	58.1	ALL.DBP.CURDRINK.COMBINED.locusleads;ALL.DBP.CURDRINK.COMBINED.regionleads;ALL.DBP.HEAVYvsLIGHT.COMBINED.locusleads;ALL.DBP.HEAVYvsLIGHT.COMBINED.regionleads;ALL.DBP.HEAVYvsLIGHT.FEMALE.locusleads;ALL.DBP.HEAVYvsLIGHT.FEMALE.regionleads;ALL.DBP.LIGHTvsNEVER.COMBINED.locusleads;ALL.DBP.LIGHTvsNEVER.COMBINED.regionleads;ALL.PP.CURDRINK.COMBINED.locusleads;ALL.PP.CURDRINK.COMBINED.regionleads;ALL.PP…
rs3915425	16:15818687:C_T	MYH11	known	0	16	15818687	t	c	0.6709	0.202	0.03379	2.25755e-09	-0.05787	0.04113	0.159427	-0.00114	72.986	1.417e-16	3.06567e-13	1146320	765023	++++++	++----	10	0.361	ALL.PP.CURDRINK.COMBINED.regionleads	203.1	ALL.PP.CURDRINK.COMBINED.locusleads;ALL.PP.CURDRINK.COMBINED.regionleads;ALL.PP.CURDRINK.FEMALE.locusleads;ALL.PP.CURDRINK.FEMALE.regionleads;ALL.PP.HEAVYvsLIGHT.COMBINED.locusleads;ALL.PP.HEAVYvsLIGHT.COMBINED.regionleads;ALL.PP.LIGHTvsNEVER.COMBINED.locusleads;ALL.PP.LIGHTvsNEVER.COMBINED.regionleads;ALL.SBP.CURDRINK.COMBINED.locusleads;ALL.SBP.CURDRINK.COMBINED.regionleads;EUR.PP.CURDRINK.COMB…
rs13175630	5:123326384:A_G	CEP120	known	-18500	5	123326384	a	g	0.0309	0.6961	0.1541	6.26637e-06	-0.2478	0.1763	0.159855	-0.02374	47.716	4.351e-11	9.35165e-08	572251	404483	+?++++	-?--++	8	0.07762	ALL.PP.CURDRINK.MALE.locusleads	98.1	ALL.PP.CURDRINK.COMBINED.locusleads;ALL.PP.CURDRINK.MALE.locusleads;ALL.PP.HEAVYvsLIGHT.COMBINED.locusleads;EUR.PP.CURDRINK.COMBINED.locusleads;EUR.PP.CURDRINK.MALE.locusleads
rs888987	5:159021393:C_G	EBF1	known	0	5	159021393	c	g	0.3537	0.07416	0.02801	0.00810592	0.04814	0.03425	0.159859	-0.0007836	45.307	1.451e-10	1.18375e-07	1134600	758682	++++++	--++-+	10	0.9044	ALL.DBP.CURDRINK.COMBINED.locusleads	60.13	ALL.DBP.CURDRINK.COMBINED.locusleads;ALL.DBP.HEAVYvsLIGHT.COMBINED.locusleads;ALL.SBP.CURDRINK.COMBINED.locusleads
rs548208	1:183334217:A_C	NMNAT2	known	0	1	183334217	a	c	0.2883	-0.1358	0.02447	2.86238e-08	0.06672	0.04754	0.160483	-0.0005986	33.666	4.894e-08	1.7804e-05	705424	203457	---+-	+-+-+	8	0.6379	ALL.DBP.HEAVYvsLIGHT.COMBINED.locusleads	647.2	ALL.DBP.HEAVYvsLIGHT.COMBINED.locusleads
rs79433440	8:11990952:C_T	DEFB134	known	-3027	8	11990952	t	c	0.9616	-0.4303	0.1052	4.30808e-05	0.17	0.1214	0.161415	-0.01106	35.112	2.374e-08	1.11787e-05	858008	634974	+?+---	+?-+++	8	0.237	ALL.DBP.CURDRINK.COMBINED.locusleads	97.42	ALL.DBP.CURDRINK.COMBINED.locusleads
rs668052	7:26828907:A_G	SKAP2	known	0	7	26828907	a	g	0.1471	0.1847	0.04237	1.30529e-05	-0.07111	0.05081	0.161655	-0.001795	35.336	2.123e-08	1.01256e-05	969707	688480	++?+++	-+?---	8	0.8277	ALL.DBP.CURDRINK.COMBINED.locusleads	24.9	ALL.DBP.CURDRINK.COMBINED.locusleads
rs12438734	15:78759793:C_T	ADAMTS7	known	0	15	78759793	t	c	0.8889	0.1395	0.06428	0.0299922	0.1087	0.07769	0.161768	-0.004124	36.738	1.053e-08	1.61179e-05	547022	388715	+?+++-	-?-+++	8	0.6742	ALL.DBP.CURDRINK.MALE.locusleads	110.5	ALL.DBP.CURDRINK.COMBINED.locusleads;ALL.DBP.CURDRINK.MALE.locusleads
rs11563447	7:27365707:C_G	EVX1	known	119134	7	27365707	c	g	0.6872	0.1035	0.03994	0.00955899	0.07228	0.05166	0.161769	-0.001593	35.293	2.169e-08	2.47081e-05	494766	314649	+-++++	+++++-	10	0.7744	ALL.DBP.CURDRINK.FEMALE.locusleads	24.1	ALL.DBP.CURDRINK.FEMALE.locusleads;ALL.SBP.CURDRINK.FEMALE.locusleads
rs62183915	2:203316198:A_G	CYP20A1	known	10358	2	203316198	a	g	0.5104	0.1043	0.03191	0.00108093	0.05413	0.03878	0.162768	-0.001016	61.887	3.642e-14	5.697e-11	1147620	766120	-+++++	+--++-	10	0.1841	ALL.PP.CURDRINK.COMBINED.locusleads	267.1	ALL.PP.CURDRINK.COMBINED.locusleads;ALL.PP.CURDRINK.COMBINED.regionleads;ALL.PP.CURDRINK.FEMALE.locusleads;ALL.PP.CURDRINK.FEMALE.regionleads;ALL.PP.CURDRINK.MALE.locusleads;ALL.PP.CURDRINK.MALE.regionleads;ALL.PP.HEAVYvsLIGHT.COMBINED.locusleads;ALL.PP.HEAVYvsLIGHT.COMBINED.regionleads;ALL.PP.HEAVYvsLIGHT.FEMALE.locusleads;ALL.PP.HEAVYvsLIGHT.FEMALE.regionleads;ALL.SBP.CURDRINK.COMBINED.locuslea…
rs1569832	20:10847652:A_G	LOC101929413	known	-27680	20	10847652	a	g	0.6785	0.1787	0.02279	4.46409e-15	0.06327	0.04539	0.163342	-0.0005192	99.438	2.555e-22	1.23394e-18	750859	208450	+++--	+++++	8	0.1649	ALL.DBP.HEAVYvsLIGHT.COMBINED.locusleads	20.7	ALL.DBP.CURDRINK.COMBINED.locusleads;ALL.DBP.CURDRINK.FEMALE.locusleads;ALL.DBP.CURDRINK.MALE.locusleads;ALL.DBP.HEAVYvsLIGHT.COMBINED.locusleads;ALL.DBP.HEAVYvsLIGHT.FEMALE.locusleads;ALL.DBP.HEAVYvsLIGHT.MALE.locusleads;ALL.DBP.HEAVYvsNEVER.COMBINED.locusleads;ALL.DBP.LIGHTvsNEVER.COMBINED.locusleads;ALL.SBP.CURDRINK.COMBINED.locusleads;ALL.SBP.HEAVYvsLIGHT.COMBINED.locusleads;ALL.SBP.HEAVYvsLI…
rs1047891	2:210675783:A_C	CPS1	known	0	2	210675783	a	c	0.2935	-0.2216	0.05006	9.5691e-06	0.08451	0.06063	0.163359	-0.002505	35.594	1.866e-08	8.8074e-06	1149460	768046	-+----	+--+++	10	0.6563	ALL.SBP.CURDRINK.COMBINED.locusleads	667.1	ALL.SBP.CURDRINK.COMBINED.locusleads;ALL.SBP.CURDRINK.COMBINED.regionleads
rs192114984	8:119477726:C_T	NOV	known	53288	8	119477726	t	c	0.0164	0.79	0.1286	8.09368e-10	-0.323	0.232	0.163849	-0.01652	43.606	5.647e-09	4.11634e-06	506250	157439	+??-?????????????+??++?+?-??????????+?+?++???+??????+?-?+?	-??+?????????????-??-+?+?+??????????+?+?+-???-??????-?+?-?	28	0.2563	EUR.PP.HEAVYvsLIGHT.COMBINED.locusleads	6.9	ALL.PP.CURDRINK.COMBINED.locusleads;EUR.PP.HEAVYvsLIGHT.COMBINED.locusleads
rs15009	5:58454523:C_G	PLK2	known	0	5	58454523	c	g	0.6188	-0.1645	0.03642	6.27963e-06	-0.1017	0.0731	0.164151	-0.001326	38.011	5.573e-09	2.66603e-06	751322	208603	-----	+----	8	0.3578	ALL.SBP.HEAVYvsLIGHT.COMBINED.regionleads	591.1	ALL.DBP.CURDRINK.COMBINED.locusleads;ALL.DBP.CURDRINK.COMBINED.regionleads;ALL.DBP.HEAVYvsLIGHT.COMBINED.locusleads;ALL.DBP.HEAVYvsLIGHT.COMBINED.regionleads;ALL.SBP.HEAVYvsLIGHT.COMBINED.locusleads;ALL.SBP.HEAVYvsLIGHT.COMBINED.regionleads
rs142787797	11:2111982:C_CACT	INS-IGF2	known	-17129	11	2111982	cact	c	0.9329	-0.2497	0.05802	1.67978e-05	-0.1535	0.1105	0.16479	-0.003364	36.875	9.834e-09	4.7676e-06	601380	171100	-?--+	-?-+-	6	0.3758	ALL.PP.HEAVYvsLIGHT.COMBINED.locusleads	29.11	ALL.PP.CURDRINK.COMBINED.locusleads;ALL.PP.HEAVYvsLIGHT.COMBINED.locusleads;ALL.SBP.CURDRINK.COMBINED.locusleads;ALL.SBP.HEAVYvsLIGHT.COMBINED.locusleads
rs2497318	10:92672243:C_T	KIF11	known	16848	10	92672243	t	c	0.3694	-0.1571	0.02976	1.29963e-07	0.04915	0.03551	0.166323	-0.0008849	58.714	1.78e-13	2.58755e-10	1148000	767884	------	++-++-	10	0.4212	ALL.DBP.CURDRINK.COMBINED.regionleads	292.1	ALL.DBP.CURDRINK.COMBINED.locusleads;ALL.DBP.CURDRINK.COMBINED.regionleads
rs939329	12:89646107:A_G	ATP2B1	known	0	12	89646107	a	g	0.5108	0.4971	0.04427	2.94373e-29	-0.07483	0.05414	0.166923	-0.001957	308.032	1.294e-67	1.1683e-62	1149990	767963	++++++	+---+-	10	3.435e-07	ALL.SBP.CURDRINK.COMBINED.locusleads	3.2	ALL.DBP.CURDRINK.COMBINED.locusleads;ALL.DBP.CURDRINK.FEMALE.locusleads;ALL.DBP.CURDRINK.MALE.locusleads;ALL.DBP.HEAVYvsLIGHT.COMBINED.locusleads;ALL.DBP.HEAVYvsLIGHT.MALE.locusleads;ALL.DBP.HEAVYvsNEVER.COMBINED.locusleads;ALL.DBP.HEAVYvsNEVER.FEMALE.locusleads;ALL.DBP.LIGHTvsNEVER.COMBINED.locusleads;ALL.DBP.LIGHTvsNEVER.FEMALE.locusleads;ALL.PP.CURDRINK.COMBINED.locusleads;ALL.PP.CURDRINK.FEMA…
NA	9:133273983:A_G	ABO	known	0	9	133273983	a	g	0.1954	-0.1428	0.03306	1.5644e-05	-0.05605	0.04058	0.167211	-0.001092	89.717	3.298e-20	1.33334e-16	1142610	762448	+-----	-+--+-	10	0.3146	ALL.DBP.CURDRINK.COMBINED.regionleads	144.1	ALL.DBP.CURDRINK.COMBINED.locusleads;ALL.DBP.CURDRINK.COMBINED.regionleads;ALL.DBP.CURDRINK.FEMALE.locusleads;ALL.DBP.CURDRINK.FEMALE.regionleads;ALL.DBP.CURDRINK.MALE.locusleads;ALL.DBP.CURDRINK.MALE.regionleads;ALL.DBP.HEAVYvsLIGHT.COMBINED.locusleads;ALL.DBP.HEAVYvsLIGHT.COMBINED.regionleads;ALL.DBP.HEAVYvsLIGHT.FEMALE.locusleads;ALL.DBP.HEAVYvsLIGHT.FEMALE.regionleads;ALL.DBP.HEAVYvsLIGHT.MAL…
rs3821843	3:53523985:A_G	CACNA1D	known	0	3	53523985	a	g	0.6524	0.4292	0.04766	2.14773e-19	-0.08062	0.05846	0.167875	-0.002269	186.385	3.366e-41	7.60611e-37	1145810	765152	+-++++	-+-+++	10	0.05065	ALL.SBP.CURDRINK.COMBINED.locusleads	50.1	AFR.DBP.CURDRINK.COMBINED.locusleads;AFR.DBP.CURDRINK.COMBINED.regionleads;AFR.DBP.HEAVYvsLIGHT.COMBINED.locusleads;AFR.DBP.HEAVYvsLIGHT.COMBINED.regionleads;AFR.DBP.LIGHTvsNEVER.COMBINED.locusleads;AFR.DBP.LIGHTvsNEVER.COMBINED.regionleads;ALL.DBP.CURDRINK.COMBINED.locusleads;ALL.DBP.CURDRINK.COMBINED.regionleads;ALL.DBP.CURDRINK.FEMALE.locusleads;ALL.DBP.CURDRINK.FEMALE.regionleads;ALL.DBP.CURD…
rs11884157	2:43019934:C_T	LOC102723854	known	-7918	2	43019934	t	c	0.823	0.1573	0.02783	1.58431e-08	-0.07587	0.05511	0.168605	-0.0007736	34.851	2.705e-08	1.06149e-05	749619	208255	++++-	-+-+-	8	0.5036	ALL.DBP.HEAVYvsLIGHT.COMBINED.locusleads	135.13	ALL.DBP.HEAVYvsLIGHT.COMBINED.locusleads
rs4658559	1:243342648:G_T	SDCCAG8	known	0	1	243342648	t	g	0.2651	0.1179	0.03298	0.00035037	0.05413	0.03933	0.168728	-0.001085	76.502	2.443e-17	7.02859e-14	1139490	763520	+++++-	+--+++	10	0.03843	ALL.DBP.CURDRINK.COMBINED.locusleads	62.2	ALL.DBP.CURDRINK.COMBINED.locusleads;ALL.DBP.CURDRINK.MALE.locusleads;ALL.DBP.HEAVYvsLIGHT.COMBINED.locusleads;ALL.DBP.HEAVYvsLIGHT.MALE.locusleads;ALL.DBP.LIGHTvsNEVER.COMBINED.locusleads;ALL.DBP.LIGHTvsNEVER.MALE.locusleads
rs2727563	7:151706043:C_T	PRKAG2	known	0	7	151706043	t	c	0.4134	-0.101	0.02235	6.21278e-06	-0.06082	0.0442	0.168816	-0.0004992	38.356	4.69e-09	2.28253e-06	742589	206998	-+---	+--+-	8	0.5585	ALL.DBP.HEAVYvsLIGHT.COMBINED.locusleads	123.2	ALL.DBP.CURDRINK.COMBINED.locusleads;ALL.DBP.HEAVYvsLIGHT.COMBINED.locusleads;ALL.SBP.HEAVYvsLIGHT.COMBINED.locusleads
rs499713	11:117191245:C_T	SIDT2	known	0	11	117191245	t	c	0.2414	0.2783	0.04984	2.35227e-08	-0.08666	0.06304	0.16923	-0.002482	55.657	8.209e-13	9.44611e-10	1147260	765167	++++++	++---+	10	0.2675	ALL.SBP.CURDRINK.COMBINED.regionleads	80.3	ALL.DBP.CURDRINK.COMBINED.locusleads;ALL.SBP.CURDRINK.COMBINED.locusleads;ALL.SBP.CURDRINK.COMBINED.regionleads;ALL.SBP.CURDRINK.FEMALE.locusleads;ALL.SBP.CURDRINK.FEMALE.regionleads
rs7826952	8:26033033:C_T	EBF2	known	0	8	26033033	t	c	0.7101	0.183	0.04719	0.000105345	0.08055	0.05861	0.169337	-0.002225	72.171	2.129e-16	4.41542e-13	1147230	765145	++++-+	-+-++-	10	0.6883	ALL.SBP.CURDRINK.COMBINED.regionleads	205.1	ALL.DBP.CURDRINK.COMBINED.locusleads;ALL.DBP.HEAVYvsLIGHT.COMBINED.locusleads;ALL.DBP.HEAVYvsLIGHT.COMBINED.regionleads;ALL.PP.CURDRINK.COMBINED.locusleads;ALL.PP.CURDRINK.COMBINED.regionleads;ALL.PP.HEAVYvsLIGHT.COMBINED.locusleads;ALL.PP.HEAVYvsLIGHT.COMBINED.regionleads;ALL.SBP.CURDRINK.COMBINED.locusleads;ALL.SBP.CURDRINK.COMBINED.regionleads;ALL.SBP.CURDRINK.FEMALE.locusleads;ALL.SBP.CURDRIN…
rs12919612	16:29883982:C_G	SEZ6L2	known	0	16	29883982	c	g	0.3592	0.1335	0.06763	0.0483845	0.1104	0.08034	0.169392	-0.004571	35.437	2.018e-08	1.82912e-05	623531	451065	+++-+	+-+++	8	0.3153	ALL.SBP.LIGHTvsNEVER.COMBINED.locusleads	318.3	ALL.SBP.HEAVYvsLIGHT.COMBINED.locusleads;ALL.SBP.LIGHTvsNEVER.COMBINED.locusleads
rs12988157	2:164211571:A_G	GRB14	known	-281241	2	164211571	a	g	0.2841	-0.2105	0.04288	9.15193e-07	-0.08246	0.06002	0.16948	-0.001838	72.643	1.682e-16	1.66678e-12	364744	192357	-----	++-+-	8	0.3834	ALL.DBP.HEAVYvsNEVER.COMBINED.locusleads	18.3	ALL.DBP.HEAVYvsNEVER.COMBINED.locusleads;ALL.DBP.HEAVYvsNEVER.MALE.locusleads;ALL.DBP.HEAVYvsNEVER.MALE.regionleads;ALL.PP.CURDRINK.COMBINED.locusleads;ALL.PP.CURDRINK.FEMALE.locusleads;ALL.PP.LIGHTvsNEVER.MALE.locusleads;ALL.SBP.CURDRINK.COMBINED.locusleads;ALL.SBP.HEAVYvsLIGHT.COMBINED.locusleads;ALL.SBP.HEAVYvsLIGHT.FEMALE.locusleads
rs4626927	1:45782973:C_T	MAST2	known	-20639	1	45782973	t	c	0.4618	0.1344	0.02434	3.35592e-08	0.06584	0.04794	0.169633	-0.0005918	53.937	1.94e-12	2.25441e-09	751272	208245	+++++	+-++-	8	0.8994	ALL.PP.HEAVYvsLIGHT.COMBINED.locusleads	338.1	ALL.PP.CURDRINK.COMBINED.locusleads;ALL.PP.CURDRINK.COMBINED.regionleads;ALL.PP.CURDRINK.MALE.locusleads;ALL.PP.CURDRINK.MALE.regionleads;ALL.PP.HEAVYvsLIGHT.COMBINED.locusleads;ALL.PP.HEAVYvsLIGHT.COMBINED.regionleads;ALL.PP.HEAVYvsLIGHT.MALE.locusleads;ALL.PP.HEAVYvsLIGHT.MALE.regionleads;EUR.PP.CURDRINK.COMBINED.locusleads;EUR.PP.CURDRINK.COMBINED.regionleads;EUR.PP.CURDRINK.MALE.locusleads;EU…
rs149487184	21:34233562:C_T	LINC00310	known	43643	21	34233562	t	c	0.0216	-0.3955	0.09614	3.89212e-05	-0.2543	0.1852	0.169718	-0.009242	33.768	4.65e-08	1.89427e-05	613127	170494	??--?	??-+?	2	0.3626	ALL.PP.HEAVYvsLIGHT.COMBINED.regionleads	453.3	ALL.PP.HEAVYvsLIGHT.COMBINED.locusleads;ALL.PP.HEAVYvsLIGHT.COMBINED.regionleads
rs61918489	12:19775902:C_T	LOC100506393	known	-238782	12	19775902	t	c	0.9135	-0.2087	0.07483	0.0052873	-0.119	0.08674	0.17009	-0.005597	63.447	1.67e-14	2.7605e-11	895623	634071	-??-++	+??---	6	0.8446	ALL.PP.CURDRINK.COMBINED.locusleads	35.5	ALL.PP.CURDRINK.COMBINED.locusleads;ALL.PP.CURDRINK.MALE.locusleads;ALL.PP.HEAVYvsLIGHT.COMBINED.locusleads;ALL.PP.HEAVYvsLIGHT.MALE.locusleads;ALL.PP.LIGHTvsNEVER.MALE.locusleads;EUR.PP.CURDRINK.COMBINED.locusleads;EUR.PP.CURDRINK.MALE.locusleads;EUR.PP.HEAVYvsLIGHT.COMBINED.locusleads;EUR.PP.HEAVYvsLIGHT.MALE.locusleads;EUR.PP.LIGHTvsNEVER.MALE.locusleads
rs1243192	10:21695031:A_C	MLLT10	known	0	10	21695031	a	c	0.2572	0.07957	0.03464	0.0216156	0.05589	0.04076	0.170313	-0.001198	44.684	1.982e-10	1.57259e-07	1062370	738019	--++-+	+++++-	10	0.1313	ALL.DBP.CURDRINK.COMBINED.regionleads	456.1	ALL.DBP.CURDRINK.COMBINED.locusleads;ALL.DBP.CURDRINK.COMBINED.regionleads;ALL.DBP.HEAVYvsLIGHT.COMBINED.locusleads;ALL.DBP.HEAVYvsLIGHT.COMBINED.regionleads;EUR.DBP.CURDRINK.COMBINED.locusleads
rs66518071	11:128892289:C_G	KCNJ5	known	0	11	128892289	c	g	0.7611	0.1423	0.03297	1.5885e-05	-0.0547	0.03997	0.171147	-0.001087	33.627	4.989e-08	2.13152e-05	1140270	761373	+?+++-	-?----	8	0.7509	ALL.DBP.CURDRINK.COMBINED.locusleads	735.1	ALL.DBP.CURDRINK.COMBINED.locusleads;ALL.DBP.CURDRINK.COMBINED.regionleads
rs2460001	1:2179591:C_T	PRKCZ	known	0	1	2179591	t	c	0.5984	0.1985	0.04524	1.1455e-05	-0.07577	0.05545	0.171796	-0.002045	33.808	4.556e-08	1.94995e-05	1143810	762365	++++++	-+---+	10	0.8919	ALL.SBP.CURDRINK.COMBINED.locusleads	171.9	ALL.SBP.CURDRINK.COMBINED.locusleads
rs7002693	8:9291320:C_G	LOC157273	known	-33730	8	9291320	c	g	0.3887	0.1488	0.04563	0.00111015	0.07584	0.05552	0.171941	-0.002049	57.011	4.171e-13	5.06778e-10	1148220	766101	++-+++	+++-+-	10	0.00926	ALL.SBP.CURDRINK.COMBINED.locusleads	97.11	ALL.DBP.CURDRINK.COMBINED.locusleads;ALL.DBP.CURDRINK.MALE.locusleads;ALL.DBP.HEAVYvsLIGHT.COMBINED.locusleads;ALL.DBP.HEAVYvsLIGHT.MALE.locusleads;ALL.SBP.CURDRINK.COMBINED.locusleads;ALL.SBP.CURDRINK.MALE.locusleads;ALL.SBP.HEAVYvsLIGHT.COMBINED.locusleads
rs4909945	11:10652192:C_T	MRVI1	known	0	11	10652192	t	c	0.2653	0.09973	0.03522	0.00463114	0.05613	0.0411	0.172035	-0.001239	61.761	3.879e-14	6.31297e-11	1051780	733239	++-+-+	-+++--	10	0.01525	ALL.DBP.CURDRINK.COMBINED.locusleads	65.4	ALL.DBP.CURDRINK.COMBINED.locusleads;ALL.DBP.CURDRINK.MALE.locusleads;ALL.DBP.HEAVYvsLIGHT.COMBINED.locusleads;ALL.DBP.HEAVYvsLIGHT.MALE.locusleads;ALL.DBP.LIGHTvsNEVER.COMBINED.locusleads;ALL.SBP.HEAVYvsLIGHT.COMBINED.locusleads;EUR.DBP.CURDRINK.COMBINED.locusleads;EUR.DBP.CURDRINK.MALE.locusleads;EUR.DBP.HEAVYvsLIGHT.COMBINED.locusleads;EUR.DBP.HEAVYvsLIGHT.MALE.locusleads;EUR.DBP.LIGHTvsNEVER.…
rs13022802	2:164209199:A_C	GRB14	known	-283613	2	164209199	a	c	0.0699	-0.2621	0.05682	3.97257e-06	-0.1446	0.106	0.17252	-0.003228	41.905	7.953e-10	5.13264e-07	606740	174231	+?---	-?-++	6	0.1376	ALL.PP.HEAVYvsLIGHT.COMBINED.locusleads	18.1	ALL.PP.HEAVYvsLIGHT.COMBINED.locusleads
rs2070699	6:12292539:G_T	EDN1	known	0	6	12292539	t	g	0.4508	-0.1618	0.03119	2.13067e-07	0.05197	0.03811	0.172667	-0.000971	51.811	5.614e-12	6.14424e-09	1141780	762174	------	++++++	10	0.8236	ALL.PP.CURDRINK.COMBINED.locusleads	66.3	ALL.PP.CURDRINK.COMBINED.locusleads;ALL.SBP.CURDRINK.COMBINED.locusleads;ALL.SBP.CURDRINK.COMBINED.regionleads;EUR.PP.CURDRINK.COMBINED.locusleads
rs197915	17:46913156:A_G	GOSR2	known	-9963	17	46913156	a	g	0.5957	-0.1924	0.03062	3.31088e-10	-0.05137	0.03769	0.172895	-0.000937	162.251	5.856e-36	6.47811e-32	1148230	766106	+-----	--+--+	10	0.115	ALL.PP.CURDRINK.COMBINED.locusleads	41.2	ALL.DBP.CURDRINK.COMBINED.locusleads;ALL.DBP.CURDRINK.COMBINED.regionleads;ALL.DBP.HEAVYvsLIGHT.COMBINED.locusleads;ALL.DBP.HEAVYvsLIGHT.COMBINED.regionleads;ALL.PP.CURDRINK.COMBINED.locusleads;ALL.PP.CURDRINK.FEMALE.locusleads;ALL.PP.CURDRINK.MALE.locusleads;ALL.PP.HEAVYvsLIGHT.COMBINED.locusleads;ALL.PP.HEAVYvsLIGHT.FEMALE.locusleads;ALL.PP.HEAVYvsLIGHT.MALE.locusleads;ALL.PP.HEAVYvsNEVER.COMBI…
rs12147852	14:52895157:A_G	FERMT2	known	0	14	52895157	a	g	0.2449	0.1662	0.03651	5.30935e-06	0.0613	0.04498	0.172937	-0.001332	95.476	1.852e-21	6.88083e-18	1095070	723551	-+++++	++++-+	10	0.1031	ALL.PP.CURDRINK.COMBINED.locusleads	129.1	ALL.DBP.HEAVYvsLIGHT.COMBINED.locusleads;ALL.DBP.HEAVYvsLIGHT.COMBINED.regionleads;ALL.PP.CURDRINK.COMBINED.locusleads;ALL.PP.CURDRINK.COMBINED.regionleads;ALL.PP.CURDRINK.FEMALE.locusleads;ALL.PP.CURDRINK.FEMALE.regionleads;ALL.PP.CURDRINK.MALE.locusleads;ALL.PP.CURDRINK.MALE.regionleads;ALL.PP.HEAVYvsLIGHT.COMBINED.locusleads;ALL.PP.HEAVYvsLIGHT.COMBINED.regionleads;ALL.PP.HEAVYvsLIGHT.FEMALE.l…
rs6026739	20:59164414:A_T	ZNF831	known	-26605	20	59164414	a	t	0.8773	-0.3168	0.04129	1.68597e-14	-0.06807	0.04995	0.172957	-0.001704	245.787	4.246e-54	2.73996e-49	1139370	763947	-+----	-----+	10	0.6545	ALL.DBP.CURDRINK.COMBINED.regionleads	26.1	ALL.DBP.CURDRINK.COMBINED.locusleads;ALL.DBP.CURDRINK.COMBINED.regionleads;ALL.DBP.CURDRINK.FEMALE.locusleads;ALL.DBP.CURDRINK.FEMALE.regionleads;ALL.DBP.CURDRINK.MALE.locusleads;ALL.DBP.CURDRINK.MALE.regionleads;ALL.DBP.HEAVYvsLIGHT.COMBINED.locusleads;ALL.DBP.HEAVYvsLIGHT.COMBINED.regionleads;ALL.DBP.HEAVYvsLIGHT.FEMALE.locusleads;ALL.DBP.HEAVYvsLIGHT.FEMALE.regionleads;ALL.DBP.HEAVYvsLIGHT.MAL…
rs7302030	12:115498948:A_T	MED13L	known	-459627	12	115498948	a	t	0.6119	0.1673	0.0311	7.47257e-08	0.08123	0.05961	0.17298	-0.0009661	52.783	3.657e-11	1.48873e-07	355632	103001	---+-+-+++-++++++++++-++-+---++--+-+++-++??+-+++-	+++-+-++--+----++--++-+++++-+-+++-++---++??-+--+-	92	0.7096	EUR.DBP.HEAVYvsLIGHT.MALE.locusleads	28.7	ALL.DBP.CURDRINK.COMBINED.locusleads;ALL.DBP.CURDRINK.MALE.locusleads;ALL.DBP.HEAVYvsLIGHT.COMBINED.locusleads;ALL.DBP.HEAVYvsLIGHT.MALE.locusleads;ALL.DBP.LIGHTvsNEVER.COMBINED.locusleads;ALL.SBP.CURDRINK.COMBINED.locusleads;ALL.SBP.CURDRINK.MALE.locusleads;ALL.SBP.HEAVYvsLIGHT.COMBINED.locusleads;ALL.SBP.HEAVYvsLIGHT.MALE.locusleads;ALL.SBP.LIGHTvsNEVER.COMBINED.locusleads;EUR.DBP.CURDRINK.COMB…
rs55858845	8:9133569:C_T	PPP1R3B	known	-2684	8	9133569	t	c	0.8051	-0.1334	0.02947	5.99297e-06	-0.07812	0.05738	0.173372	-0.0008581	38.509	4.344e-09	2.13696e-06	664494	180948	-----	----+	8	0.5145	ALL.DBP.HEAVYvsLIGHT.COMBINED.locusleads	97.29	ALL.DBP.CURDRINK.COMBINED.locusleads;ALL.DBP.HEAVYvsLIGHT.COMBINED.locusleads;ALL.SBP.CURDRINK.COMBINED.locusleads
rs700082	9:123103791:C_G	RABGAP1	known	0	9	123103791	c	g	0.7673	0.1839	0.0376	1.00347e-06	0.06563	0.04829	0.174121	-0.00141	90.878	1.846e-20	6.27175e-17	1145950	764641	+-++++	+++-+-	10	0.1614	ALL.PP.CURDRINK.COMBINED.locusleads	139.1	ALL.PP.CURDRINK.COMBINED.locusleads;ALL.PP.CURDRINK.COMBINED.regionleads;ALL.PP.CURDRINK.FEMALE.locusleads;ALL.PP.CURDRINK.FEMALE.regionleads;ALL.PP.CURDRINK.MALE.locusleads;ALL.PP.CURDRINK.MALE.regionleads;ALL.PP.HEAVYvsLIGHT.COMBINED.locusleads;ALL.PP.HEAVYvsLIGHT.COMBINED.regionleads;ALL.PP.HEAVYvsLIGHT.FEMALE.locusleads;ALL.PP.HEAVYvsLIGHT.FEMALE.regionleads;ALL.PP.HEAVYvsLIGHT.MALE.locuslead…
rs16852694	3:168863381:A_G	EGFEM1P	known	32795	3	168863381	a	g	0.9169	-0.1393	0.0461	0.00251366	-0.0848	0.06255	0.17519	-0.002123	37.113	8.73e-09	4.60082e-06	1105680	743724	+?---+	+?--+-	8	0.1693	ALL.DBP.CURDRINK.COMBINED.locusleads	61.11	ALL.DBP.CURDRINK.COMBINED.locusleads
rs112204826	21:43301147:C_T	LINC00322	known	-21061	21	43301147	t	c	0.0358	0.2343	0.08976	0.00904644	0.1414	0.1043	0.175193	-0.008056	56.607	5.104e-13	6.87183e-10	927676	666244	+??+++	+??+++	6	0.581	ALL.DBP.CURDRINK.COMBINED.locusleads	259.3	ALL.DBP.CURDRINK.COMBINED.locusleads;ALL.DBP.CURDRINK.MALE.locusleads;ALL.DBP.HEAVYvsLIGHT.COMBINED.locusleads;ALL.DBP.HEAVYvsLIGHT.COMBINED.regionleads;ALL.SBP.CURDRINK.COMBINED.locusleads;ALL.SBP.HEAVYvsLIGHT.COMBINED.locusleads;EUR.DBP.CURDRINK.COMBINED.locusleads;EUR.DBP.CURDRINK.COMBINED.regionleads;EUR.DBP.CURDRINK.MALE.locusleads;EUR.DBP.CURDRINK.MALE.regionleads;EUR.DBP.HEAVYvsLIGHT.COMBI…
rs1856562	1:184583193:C_T	C1orf21	known	0	1	184583193	t	c	0.5027	-0.1265	0.02694	2.65799e-06	0.04449	0.03283	0.175366	-0.0007249	40.977	1.265e-09	8.3658e-07	1146230	764995	------	+-++--	10	0.4615	ALL.DBP.CURDRINK.COMBINED.regionleads	525.1	ALL.DBP.CURDRINK.COMBINED.locusleads;ALL.DBP.CURDRINK.COMBINED.regionleads;ALL.SBP.CURDRINK.COMBINED.locusleads;ALL.SBP.CURDRINK.COMBINED.regionleads;ALL.SBP.CURDRINK.FEMALE.locusleads;ALL.SBP.CURDRINK.FEMALE.regionleads
rs147382204	17:46691231:G_T	NSF	known	0	17	46691231	t	g	0.7209	-0.09936	0.04306	0.0210282	-0.07113	0.0525	0.175463	-0.001852	37.347	7.767e-09	4.58274e-06	907805	604012	-?+-+-	+?-+-+	8	0.1468	ALL.PP.CURDRINK.COMBINED.locusleads	41.36	ALL.PP.CURDRINK.COMBINED.locusleads
rs12940887	17:49325445:C_T	ZNF652	known	0	17	49325445	t	c	0.3114	0.1716	0.03035	1.56723e-08	0.04911	0.03626	0.175614	-0.0009192	154.238	3.218e-34	3.87961e-30	1148990	767825	+++++-	+--+-+	10	0.2988	ALL.DBP.CURDRINK.COMBINED.locusleads	41.3	ALL.DBP.CURDRINK.COMBINED.locusleads;ALL.DBP.CURDRINK.COMBINED.regionleads;ALL.DBP.CURDRINK.FEMALE.locusleads;ALL.DBP.CURDRINK.FEMALE.regionleads;ALL.DBP.CURDRINK.MALE.locusleads;ALL.DBP.CURDRINK.MALE.regionleads;ALL.DBP.HEAVYvsLIGHT.COMBINED.locusleads;ALL.DBP.HEAVYvsLIGHT.COMBINED.regionleads;ALL.DBP.HEAVYvsLIGHT.FEMALE.locusleads;ALL.DBP.HEAVYvsLIGHT.FEMALE.regionleads;ALL.DBP.HEAVYvsLIGHT.MAL…
rs6658785	1:23143236:C_T	LUZP1	known	0	1	23143236	t	c	0.8205	-0.2088	0.04767	1.18618e-05	0.07612	0.05625	0.175978	-0.00227	38.772	3.809e-09	2.43293e-06	969134	688287	--?--+	--?+++	8	0.5544	ALL.PP.CURDRINK.COMBINED.regionleads	574.1	ALL.PP.CURDRINK.COMBINED.locusleads;ALL.PP.CURDRINK.COMBINED.regionleads
rs4924523	15:40963172:A_T	CHAC1	known	6653	15	40963172	a	t	0.4147	0.08869	0.02788	0.001467	0.04557	0.03374	0.176816	-0.0007764	59.766	1.052e-13	1.59036e-10	1147630	766121	+++++-	-+-+--	10	0.6066	ALL.DBP.CURDRINK.COMBINED.locusleads	178.2	ALL.DBP.CURDRINK.COMBINED.locusleads;ALL.DBP.HEAVYvsLIGHT.COMBINED.locusleads;ALL.DBP.HEAVYvsLIGHT.FEMALE.locusleads;ALL.SBP.CURDRINK.COMBINED.locusleads;ALL.SBP.HEAVYvsLIGHT.FEMALE.locusleads
rs13333226	16:20354332:A_G	UMOD	known	1454	16	20354332	a	g	0.8224	0.1631	0.02767	3.75885e-09	0.07459	0.05527	0.177158	-0.0007649	59.367	1.284e-13	1.84638e-10	749096	207983	+-+++	-++-+	8	0.4892	ALL.DBP.HEAVYvsLIGHT.COMBINED.locusleads	130.2	ALL.DBP.CURDRINK.COMBINED.locusleads;ALL.DBP.HEAVYvsLIGHT.COMBINED.locusleads;ALL.DBP.HEAVYvsLIGHT.MALE.locusleads;ALL.DBP.LIGHTvsNEVER.COMBINED.locusleads
rs10188861	2:43538971:C_T	THADA	known	0	2	43538971	t	c	0.6493	0.08105	0.03054	0.00795682	0.04906	0.03636	0.177245	-0.0009318	50.276	1.21e-11	1.2218e-08	1135460	763517	++++++	+--+-+	10	0.8956	ALL.DBP.CURDRINK.COMBINED.locusleads	135.7	ALL.DBP.CURDRINK.COMBINED.locusleads;ALL.DBP.HEAVYvsLIGHT.COMBINED.locusleads;ALL.DBP.LIGHTvsNEVER.COMBINED.locusleads;ALL.PP.CURDRINK.COMBINED.locusleads;ALL.PP.CURDRINK.COMBINED.regionleads;ALL.PP.HEAVYvsLIGHT.COMBINED.locusleads;ALL.PP.HEAVYvsLIGHT.COMBINED.regionleads;ALL.SBP.CURDRINK.COMBINED.locusleads;ALL.SBP.CURDRINK.MALE.locusleads;ALL.SBP.CURDRINK.MALE.regionleads;ALL.SBP.HEAVYvsLIGHT.C…
rs7662342	4:26803771:A_G	TBC1D19	known	47558	4	26803771	a	g	0.4034	0.09349	0.02736	0.000633078	0.04501	0.03336	0.177266	-0.0007481	64.111	1.198e-14	2.13905e-11	1146300	765011	++++-+	--++++	10	0.1215	ALL.DBP.CURDRINK.COMBINED.regionleads	255.1	ALL.DBP.CURDRINK.COMBINED.locusleads;ALL.DBP.CURDRINK.COMBINED.regionleads;ALL.DBP.CURDRINK.FEMALE.locusleads;ALL.DBP.CURDRINK.FEMALE.regionleads;ALL.DBP.HEAVYvsLIGHT.COMBINED.locusleads;ALL.DBP.HEAVYvsLIGHT.COMBINED.regionleads;ALL.DBP.HEAVYvsLIGHT.FEMALE.locusleads;ALL.DBP.HEAVYvsLIGHT.FEMALE.regionleads;ALL.DBP.LIGHTvsNEVER.COMBINED.locusleads;ALL.SBP.CURDRINK.COMBINED.locusleads;ALL.SBP.CURDR…
rs1555514	14:99735527:A_G	CYP46A1	known	8226	14	99735527	a	g	0.1483	-0.1098	0.04154	0.00821179	-0.06968	0.05167	0.177479	-0.001725	41.053	1.217e-09	8.63766e-07	1143810	763710	-+--++	+--+--	10	0.03925	ALL.PP.CURDRINK.COMBINED.locusleads	155.5	ALL.PP.CURDRINK.COMBINED.locusleads
rs79030490	6:133766551:A_C	EYA4-AS1	known	0	6	133766551	a	c	0.0126	-1.195	0.2206	6.05923e-08	0.4408	0.3271	0.177787	-0.04847	38.924	3.531e-09	1.98134e-06	631961	458469	-??--?	+??++?	4	0.7293	ALL.SBP.CURDRINK.COMBINED.locusleads	569.1	AFR.SBP.CURDRINK.COMBINED.locusleads;AFR.SBP.CURDRINK.COMBINED.regionleads;ALL.SBP.CURDRINK.COMBINED.locusleads;ALL.SBP.CURDRINK.COMBINED.regionleads
rs76626684	3:111841564:A_T	PHLDB2,PLCXD2	known	0	3	111841564	a	t	0.8388	0.1031	0.03625	0.00445318	0.05984	0.04448	0.178521	-0.001314	47.988	3.797e-11	3.46399e-08	1093760	723379	++++++	--++++	10	0.04345	ALL.DBP.CURDRINK.COMBINED.locusleads	405.1	ALL.DBP.CURDRINK.COMBINED.locusleads;ALL.DBP.CURDRINK.COMBINED.regionleads;ALL.DBP.HEAVYvsLIGHT.COMBINED.locusleads;ALL.DBP.HEAVYvsLIGHT.COMBINED.regionleads
rs8112326	19:29746041:A_G	C19orf12	known	30252	19	29746041	a	g	0.3797	0.1319	0.02252	4.71258e-09	-0.05981	0.04446	0.178543	-0.0005064	37.794	6.21e-09	2.91819e-06	749344	208010	++++-	---+-	8	0.1492	ALL.DBP.HEAVYvsLIGHT.COMBINED.locusleads	100.3	ALL.DBP.CURDRINK.COMBINED.locusleads;ALL.DBP.HEAVYvsLIGHT.COMBINED.locusleads
rs11690613	2:19743053:A_G	LINC00954	known	-125800	2	19743053	a	g	0.3997	0.1415	0.03158	7.44042e-06	-0.05231	0.03893	0.179047	-0.0009962	35.328	2.131e-08	1.12705e-05	1148360	766158	+-+++-	---+-+	10	0.3874	ALL.PP.CURDRINK.COMBINED.locusleads	54.6	ALL.PP.CURDRINK.COMBINED.locusleads
NA	19:7326961:C_G	INSR	known	32961	19	7326961	c	g	0.5482	0.2148	0.03589	2.16451e-09	-0.06568	0.04891	0.179313	-0.001287	55.858	7.424e-13	9.72105e-10	542895	292878	+?+++?	+?---?	6	0.3937	ALL.DBP.CURDRINK.COMBINED.locusleads	32.6	ALL.DBP.CURDRINK.COMBINED.locusleads;ALL.DBP.CURDRINK.MALE.locusleads;ALL.DBP.LIGHTvsNEVER.COMBINED.locusleads;ALL.SBP.CURDRINK.COMBINED.locusleads
rs35096485	17:80401169:A_G	LOC100294362	known	0	17	80401169	a	g	0.7272	-0.172	0.03534	1.13301e-06	0.06049	0.0451	0.179842	-0.001246	39.236	3.02e-09	1.97413e-06	1068850	702264	-?---+	+?+-+-	8	0.09337	ALL.PP.CURDRINK.COMBINED.locusleads	55.3	ALL.PP.CURDRINK.COMBINED.locusleads;ALL.SBP.CURDRINK.COMBINED.locusleads
rs2836411	21:38447907:C_T	ERG	known	0	21	38447907	t	c	0.319	0.09518	0.02919	0.00111135	0.04749	0.03541	0.179873	-0.000852	61.243	5.027e-14	8.01354e-11	1131240	756210	++-+++	--+++-	10	0.2612	ALL.DBP.CURDRINK.COMBINED.regionleads	101.1	ALL.DBP.CURDRINK.COMBINED.locusleads;ALL.DBP.CURDRINK.COMBINED.regionleads;ALL.DBP.CURDRINK.MALE.locusleads;ALL.DBP.HEAVYvsLIGHT.COMBINED.locusleads;ALL.DBP.HEAVYvsLIGHT.COMBINED.regionleads;ALL.DBP.HEAVYvsLIGHT.MALE.locusleads;ALL.DBP.HEAVYvsLIGHT.MALE.regionleads;ALL.PP.CURDRINK.COMBINED.locusleads;ALL.PP.HEAVYvsNEVER.COMBINED.locusleads;ALL.PP.HEAVYvsNEVER.COMBINED.regionleads;EUR.DBP.CURDRINK…
rs766521	16:75390256:C_T	CFDP1	known	0	16	75390256	t	c	0.5622	0.1664	0.03153	1.30949e-07	0.05196	0.03875	0.179952	-0.0009929	121.158	4.907e-27	3.00471e-23	1084010	725976	++++++	--++++	10	0.00107	ALL.PP.CURDRINK.COMBINED.regionleads	89.1	ALL.PP.CURDRINK.COMBINED.locusleads;ALL.PP.CURDRINK.COMBINED.regionleads;ALL.PP.CURDRINK.FEMALE.locusleads;ALL.PP.CURDRINK.FEMALE.regionleads;ALL.PP.CURDRINK.MALE.locusleads;ALL.PP.CURDRINK.MALE.regionleads;ALL.PP.HEAVYvsLIGHT.COMBINED.locusleads;ALL.PP.HEAVYvsLIGHT.COMBINED.regionleads;ALL.PP.HEAVYvsLIGHT.FEMALE.locusleads;ALL.PP.HEAVYvsLIGHT.FEMALE.regionleads;ALL.PP.HEAVYvsLIGHT.MALE.locuslead…
rs3746038	19:1852495:C_T	KLF16	known	0	19	1852495	t	c	0.2589	-0.3109	0.04961	3.6835e-10	0.08418	0.06279	0.180031	-0.002458	73.667	1.008e-16	2.17733e-13	1141380	761139	-----+	+++++-	10	0.6699	ALL.SBP.CURDRINK.COMBINED.locusleads	16.3	ALL.DBP.CURDRINK.COMBINED.locusleads;ALL.DBP.CURDRINK.COMBINED.regionleads;ALL.DBP.LIGHTvsNEVER.COMBINED.locusleads;ALL.DBP.LIGHTvsNEVER.COMBINED.regionleads;ALL.PP.CURDRINK.COMBINED.locusleads;ALL.SBP.CURDRINK.COMBINED.locusleads;ALL.SBP.CURDRINK.FEMALE.locusleads;ALL.SBP.CURDRINK.MALE.locusleads;ALL.SBP.HEAVYvsLIGHT.COMBINED.locusleads;ALL.SBP.HEAVYvsNEVER.COMBINED.locusleads;ALL.SBP.HEAVYvsNEV…
rs12139438	1:59164883:C_T	HSD52	known	18076	1	59164883	t	c	0.4673	0.1444	0.03047	2.14683e-06	0.04991	0.03734	0.181341	-0.0009276	103.071	4.154e-23	1.78744e-19	1147190	765136	++++--	-+--++	10	0.005502	ALL.PP.CURDRINK.COMBINED.locusleads	47.2	ALL.PP.CURDRINK.COMBINED.locusleads;ALL.PP.CURDRINK.FEMALE.locusleads;ALL.PP.CURDRINK.MALE.locusleads;ALL.PP.HEAVYvsLIGHT.COMBINED.locusleads;ALL.PP.HEAVYvsLIGHT.FEMALE.locusleads;ALL.PP.HEAVYvsLIGHT.MALE.locusleads;ALL.PP.LIGHTvsNEVER.MALE.locusleads;ALL.PP.LIGHTvsNEVER.MALE.regionleads;EUR.PP.LIGHTvsNEVER.MALE.locusleads;EUR.PP.LIGHTvsNEVER.MALE.regionleads
rs4140431	6:159932216:C_T	MAS1	known	24141	6	159932216	t	c	0.6004	-0.07307	0.03177	0.02145	-0.05236	0.03918	0.18142	-0.001008	35.058	2.439e-08	1.27058e-05	1148200	766098	-+--++	++----	10	0.4886	ALL.PP.CURDRINK.COMBINED.regionleads	692.1	ALL.PP.CURDRINK.COMBINED.locusleads;ALL.PP.CURDRINK.COMBINED.regionleads;ALL.PP.HEAVYvsLIGHT.COMBINED.locusleads;ALL.PP.HEAVYvsLIGHT.COMBINED.regionleads
rs17150211	8:9540608:A_G	TNKS	known	-15326	8	9540608	a	g	0.1714	0.258	0.05956	1.47918e-05	-0.0966	0.07229	0.181456	-0.003531	33.749	4.692e-08	2.00199e-05	1145110	764987	++++++	-+----	10	0.2606	ALL.SBP.CURDRINK.COMBINED.locusleads	97.45	ALL.SBP.CURDRINK.COMBINED.locusleads
rs9337951	10:30028144:A_G	KIAA1462	known	0	10	30028144	a	g	0.2907	0.2938	0.04285	7.05799e-12	-0.06627	0.04971	0.182488	-0.001834	127.664	1.897e-28	1.27141e-24	1064470	739802	++-+++	----+-	10	0.3438	ALL.PP.CURDRINK.COMBINED.locusleads	82.1	ALL.DBP.CURDRINK.COMBINED.locusleads;ALL.DBP.CURDRINK.COMBINED.regionleads;ALL.PP.CURDRINK.COMBINED.locusleads;ALL.PP.CURDRINK.COMBINED.regionleads;ALL.PP.CURDRINK.FEMALE.locusleads;ALL.PP.CURDRINK.FEMALE.regionleads;ALL.PP.CURDRINK.MALE.locusleads;ALL.PP.CURDRINK.MALE.regionleads;ALL.PP.HEAVYvsLIGHT.COMBINED.locusleads;ALL.PP.HEAVYvsLIGHT.COMBINED.regionleads;ALL.PP.HEAVYvsLIGHT.FEMALE.locuslead…
rs6108801	20:11008871:C_T	LOC101929413	known	99599	20	11008871	t	c	0.0516	0.1594	0.05973	0.00761509	0.1016	0.07624	0.182652	-0.003566	37.391	7.597e-09	4.06966e-06	1099460	742289	+?++++	-?++-+	8	0.8997	ALL.DBP.CURDRINK.COMBINED.locusleads	20.25	ALL.DBP.CURDRINK.COMBINED.locusleads
rs1129406	12:50809588:C_T	ATF1	known	0	12	50809588	t	c	0.3893	-0.1087	0.02706	5.89439e-05	-0.04396	0.03306	0.183616	-0.0007307	80.028	4.188e-18	1.331e-14	1143260	762408	-+----	--+-+-	10	0.09277	ALL.DBP.CURDRINK.COMBINED.locusleads	99.2	ALL.DBP.CURDRINK.COMBINED.locusleads;ALL.DBP.CURDRINK.FEMALE.locusleads;ALL.DBP.CURDRINK.MALE.locusleads;ALL.DBP.HEAVYvsLIGHT.COMBINED.locusleads;ALL.DBP.HEAVYvsLIGHT.FEMALE.locusleads;ALL.DBP.LIGHTvsNEVER.COMBINED.locusleads;ALL.SBP.CURDRINK.COMBINED.locusleads;ALL.SBP.HEAVYvsLIGHT.COMBINED.locusleads
rs888197	12:12475285:C_T	DUSP16	known	0	12	12475285	t	c	0.685	0.1181	0.02631	7.16297e-06	0.06918	0.05213	0.184487	-0.0006916	37.416	7.501e-09	3.74942e-06	750409	208420	+-++-	+++-+	8	0.2735	ALL.PP.HEAVYvsLIGHT.COMBINED.locusleads	167.4	ALL.PP.CURDRINK.COMBINED.locusleads;ALL.PP.HEAVYvsLIGHT.COMBINED.locusleads
rs74071614	14:91913776:A_C	FBLN5	known	0	14	91913776	a	c	0.1192	0.18	0.03994	6.5825e-06	0.1045	0.07875	0.184514	-0.001594	37.864	5.996e-09	3.06814e-06	669959	181724	+?+++	-?+--	6	0.8405	ALL.PP.HEAVYvsLIGHT.COMBINED.locusleads	265.2	ALL.PP.CURDRINK.COMBINED.locusleads;ALL.PP.HEAVYvsLIGHT.COMBINED.locusleads
rs77110228	15:94776948:C_T	LOC440311	known	-78414	15	94776948	t	c	0.1291	0.2406	0.05571	1.56884e-05	-0.08747	0.06594	0.184671	-0.0031	37.323	7.86e-09	1.25157e-05	638346	446358	++++++	-----+	10	0.9808	ALL.DBP.CURDRINK.MALE.locusleads	76.3	ALL.DBP.CURDRINK.COMBINED.locusleads;ALL.DBP.CURDRINK.MALE.locusleads;ALL.SBP.CURDRINK.COMBINED.locusleads
rs13164856	5:132477512:C_T	C5orf56	known	1468	5	132477512	t	c	0.7043	-0.1414	0.02332	1.3322e-09	0.06113	0.04613	0.185115	-0.0005429	40.842	1.353e-09	7.72723e-07	750580	208479	+----	-++-+	8	0.4401	ALL.DBP.HEAVYvsLIGHT.COMBINED.locusleads	179.3	ALL.DBP.CURDRINK.COMBINED.locusleads;ALL.DBP.HEAVYvsLIGHT.COMBINED.locusleads;ALL.DBP.LIGHTvsNEVER.COMBINED.locusleads;ALL.SBP.HEAVYvsLIGHT.COMBINED.locusleads;ALL.SBP.HEAVYvsLIGHT.COMBINED.regionleads;EUR.SBP.HEAVYvsLIGHT.COMBINED.locusleads;EUR.SBP.HEAVYvsLIGHT.COMBINED.regionleads
rs28551743	8:142877996:A_G	CYP11B1	known	0	8	142877996	a	g	0.4761	-0.3095	0.04443	3.26047e-12	0.07178	0.05429	0.186115	-0.001973	106.397	7.875e-24	4.02625e-20	1147250	765164	-+----	+-+-++	10	0.001259	ALL.SBP.CURDRINK.COMBINED.locusleads	111.1	ALL.DBP.CURDRINK.COMBINED.locusleads;ALL.DBP.CURDRINK.COMBINED.regionleads;ALL.DBP.CURDRINK.FEMALE.locusleads;ALL.DBP.CURDRINK.FEMALE.regionleads;ALL.DBP.CURDRINK.MALE.locusleads;ALL.DBP.CURDRINK.MALE.regionleads;ALL.DBP.HEAVYvsLIGHT.COMBINED.locusleads;ALL.DBP.HEAVYvsLIGHT.COMBINED.regionleads;ALL.DBP.HEAVYvsLIGHT.FEMALE.locusleads;ALL.DBP.HEAVYvsLIGHT.FEMALE.regionleads;ALL.DBP.HEAVYvsNEVER.COM…
rs641901	22:20714371:A_G	PI4KA	novel-T3	0	22	20714371	a	g	0.2249	-0.1216	0.05289	0.0214986	-0.0867	0.06564	0.186554	-0.002795	33.879	4.399e-08	1.89043e-05	1138150	760992	++--+-	-----+	10	0.7253	ALL.SBP.CURDRINK.COMBINED.regionleads	728.1	ALL.SBP.CURDRINK.COMBINED.locusleads;ALL.SBP.CURDRINK.COMBINED.regionleads
rs10780928	9:70394997:A_G	KLF9	known	0	9	70394997	a	g	0.5385	-0.1368	0.02426	1.71128e-08	0.06265	0.04759	0.188022	-0.000588	35.072	2.422e-08	1.06087e-05	750534	208476	---+-	--+++	8	0.4386	ALL.PP.HEAVYvsLIGHT.COMBINED.regionleads	691.1	ALL.PP.HEAVYvsLIGHT.COMBINED.locusleads;ALL.PP.HEAVYvsLIGHT.COMBINED.regionleads
rs4743302	9:98980525:C_T	COL15A1	known	0	9	98980525	t	c	0.5461	0.1186	0.03127	0.000148975	0.05049	0.03837	0.188217	-0.0009766	71.816	2.543e-16	5.2696e-13	1147080	765078	++++-+	--++++	10	0.006544	ALL.PP.CURDRINK.COMBINED.locusleads	206.1	ALL.PP.CURDRINK.COMBINED.locusleads;ALL.PP.CURDRINK.COMBINED.regionleads;ALL.PP.CURDRINK.MALE.locusleads;ALL.PP.CURDRINK.MALE.regionleads;ALL.PP.HEAVYvsLIGHT.COMBINED.locusleads;ALL.PP.HEAVYvsLIGHT.COMBINED.regionleads;ALL.PP.HEAVYvsLIGHT.MALE.locusleads;ALL.PP.HEAVYvsLIGHT.MALE.regionleads;ALL.PP.LIGHTvsNEVER.COMBINED.locusleads;ALL.PP.LIGHTvsNEVER.COMBINED.regionleads;ALL.PP.LIGHTvsNEVER.MALE.l…
rs13180728	5:32727578:G_T	NPR3	known	0	5	32727578	t	g	0.2546	-0.23	0.06567	0.000461156	-0.1003	0.07633	0.188836	-0.004308	83.836	6.24e-19	1.75419e-15	961194	690153	+?----	+?+-+-	8	0.1658	ALL.SBP.CURDRINK.COMBINED.locusleads	7.4	ALL.DBP.CURDRINK.COMBINED.locusleads;ALL.DBP.CURDRINK.FEMALE.locusleads;ALL.DBP.HEAVYvsLIGHT.COMBINED.locusleads;ALL.DBP.HEAVYvsLIGHT.FEMALE.locusleads;ALL.PP.CURDRINK.COMBINED.locusleads;ALL.PP.CURDRINK.FEMALE.locusleads;ALL.PP.HEAVYvsLIGHT.COMBINED.locusleads;ALL.SBP.CURDRINK.COMBINED.locusleads;ALL.SBP.CURDRINK.FEMALE.locusleads;ALL.SBP.CURDRINK.MALE.locusleads;ALL.SBP.HEAVYvsLIGHT.COMBINED.lo…
rs112069880	5:32947230:A_G	LOC340113	known	-212	5	32947230	a	g	0.1266	-0.1505	0.08572	0.0791369	-0.1284	0.09773	0.188906	-0.007346	38.327	3.855e-08	3.86356e-05	482787	358116	----+-----?-+++?--+--++?+-+-++-++-+-+++---++----??---+-	-+++-+++-+?+---?++-++--?-+-+--+--++----+-+---+--??+++-+	98	0.5561	EUR.PP.CURDRINK.MALE.locusleads	7.16	EUR.PP.CURDRINK.MALE.locusleads;EUR.PP.HEAVYvsLIGHT.MALE.locusleads
rs115131972	16:51586142:A_G	MIR548AI	known	176274	16	51586142	a	g	0.0712	0.4692	0.1058	9.21652e-06	-0.1617	0.1233	0.189711	-0.01119	43.231	4.097e-10	2.81443e-07	957832	683887	++?+++	+-?-+-	8	0.3004	ALL.SBP.CURDRINK.COMBINED.locusleads	356.2	ALL.DBP.CURDRINK.COMBINED.locusleads;ALL.SBP.CURDRINK.COMBINED.locusleads;EUR.DBP.CURDRINK.COMBINED.locusleads;EUR.SBP.CURDRINK.COMBINED.locusleads
rs6705662	2:134825809:C_T	ACMSD	known	-12806	2	134825809	t	c	0.6642	0.1155	0.02735	2.41035e-05	0.06497	0.04957	0.189969	-0.00073	35.904	1.598e-08	6.72024e-06	650428	197018	-++-+	+-++-	8	0.1089	ALL.DBP.HEAVYvsLIGHT.COMBINED.regionleads	496.3	ALL.DBP.CURDRINK.COMBINED.locusleads;ALL.DBP.HEAVYvsLIGHT.COMBINED.locusleads;ALL.DBP.HEAVYvsLIGHT.COMBINED.regionleads
rs10777173	12:89503226:C_T	POC1B	known	0	12	89503226	t	c	0.274	0.1573	0.03461	5.49537e-06	-0.05517	0.04214	0.190464	-0.001197	38.586	4.179e-09	2.64194e-06	1148370	766171	--++++	++----	10	0.4343	ALL.PP.CURDRINK.COMBINED.locusleads	3.13	ALL.PP.CURDRINK.COMBINED.locusleads;ALL.SBP.CURDRINK.COMBINED.locusleads
rs62454415	7:27143911:C_G	HOXA-AS3	known	0	7	27143911	c	g	0.8342	0.2615	0.0578	6.06182e-06	-0.0933	0.07154	0.192177	-0.003339	36.337	1.287e-08	6.33086e-06	1148440	766210	+-++++	+-----	10	0.3265	ALL.SBP.CURDRINK.COMBINED.locusleads	24.8	ALL.SBP.CURDRINK.COMBINED.locusleads;EUR.SBP.CURDRINK.COMBINED.locusleads
rs3804972	3:7444869:A_G	GRM7	known	0	3	7444869	a	g	0.4255	0.09543	0.02218	1.68863e-05	0.05713	0.04381	0.19222	-0.000491	34.757	2.836e-08	1.10624e-05	750174	208341	-++-+	+-+--	8	0.7524	ALL.DBP.HEAVYvsLIGHT.COMBINED.locusleads	703.1	ALL.DBP.HEAVYvsLIGHT.COMBINED.locusleads;ALL.DBP.HEAVYvsLIGHT.COMBINED.regionleads
rs1397273	11:57937852:A_G	OR9Q1	known	-86028	11	57937852	a	g	0.699	0.2113	0.04347	1.16898e-06	-0.07202	0.05525	0.192394	-0.001889	40.21	1.855e-09	3.70598e-06	494109	314111	+-+++-	-++---	10	0.8772	ALL.PP.CURDRINK.FEMALE.locusleads	181.2	ALL.PP.CURDRINK.FEMALE.locusleads;ALL.SBP.CURDRINK.FEMALE.locusleads
rs3918226	7:150993088:C_T	NOS3	known	0	7	150993088	t	c	0.0755	0.4291	0.06244	6.32204e-12	0.09482	0.07275	0.192449	-0.003896	243.403	1.399e-53	8.69344e-49	930252	668655	+??+++	+??+++	6	0.8578	ALL.DBP.CURDRINK.COMBINED.locusleads	27.1	ALL.DBP.CURDRINK.COMBINED.locusleads;ALL.DBP.CURDRINK.COMBINED.regionleads;ALL.DBP.CURDRINK.FEMALE.locusleads;ALL.DBP.CURDRINK.MALE.locusleads;ALL.DBP.CURDRINK.MALE.regionleads;ALL.DBP.HEAVYvsLIGHT.COMBINED.locusleads;ALL.DBP.HEAVYvsLIGHT.COMBINED.regionleads;ALL.DBP.HEAVYvsLIGHT.FEMALE.locusleads;ALL.DBP.HEAVYvsLIGHT.MALE.locusleads;ALL.DBP.HEAVYvsLIGHT.MALE.regionleads;ALL.DBP.HEAVYvsNEVER.COMB…
rs7016250	8:64580872:G_T	BHLHE22	known	0	8	64580872	t	g	0.6332	-0.1102	0.04717	0.0194792	-0.07594	0.05828	0.192568	-0.00222	34.675	2.953e-08	1.32438e-05	1147270	765167	--+-++	++----	10	0.4141	ALL.SBP.CURDRINK.COMBINED.locusleads	706.1	ALL.SBP.CURDRINK.COMBINED.locusleads;ALL.SBP.CURDRINK.COMBINED.regionleads
rs761063	16:1326385:C_G	UBE2I	known	0	16	1326385	c	g	0.6799	-0.0934	0.04081	0.0220994	-0.06247	0.04796	0.192731	-0.001662	42.986	4.631e-10	3.57043e-07	968500	687547	-++---	-+--++	10	0.3374	ALL.PP.CURDRINK.COMBINED.locusleads	378.2	ALL.PP.CURDRINK.COMBINED.locusleads;ALL.PP.HEAVYvsLIGHT.COMBINED.locusleads
rs6601720	8:8643214:C_T	CLDN23	known	-58941	8	8643214	t	c	0.5411	-0.1507	0.04428	0.000665668	-0.06994	0.05377	0.193352	-0.001922	58.667	1.822e-13	2.35727e-10	1148500	766229	+-+-+-	-+-+-+	10	0.003501	ALL.SBP.CURDRINK.COMBINED.locusleads	97.9	ALL.DBP.CURDRINK.COMBINED.locusleads;ALL.PP.CURDRINK.COMBINED.locusleads;ALL.PP.HEAVYvsLIGHT.COMBINED.locusleads;ALL.PP.HEAVYvsLIGHT.COMBINED.regionleads;ALL.SBP.CURDRINK.COMBINED.locusleads;ALL.SBP.CURDRINK.MALE.locusleads;ALL.SBP.HEAVYvsLIGHT.COMBINED.locusleads;ALL.SBP.LIGHTvsNEVER.COMBINED.locusleads
rs2168101	11:8233861:A_C	LMO1	known	0	11	8233861	a	c	0.2762	-0.08992	0.03148	0.00428452	-0.04931	0.03792	0.193474	-0.0009901	51.281	7.318e-12	7.70671e-09	1144060	764583	+?---+	+?--+-	8	0.5281	ALL.DBP.CURDRINK.COMBINED.locusleads	366.1	ALL.DBP.CURDRINK.COMBINED.locusleads;ALL.DBP.CURDRINK.COMBINED.regionleads;ALL.DBP.CURDRINK.MALE.locusleads;ALL.DBP.CURDRINK.MALE.regionleads;ALL.DBP.HEAVYvsLIGHT.COMBINED.locusleads;ALL.DBP.HEAVYvsLIGHT.COMBINED.regionleads;ALL.DBP.HEAVYvsLIGHT.MALE.locusleads;ALL.DBP.HEAVYvsLIGHT.MALE.regionleads;EUR.DBP.CURDRINK.COMBINED.locusleads;EUR.DBP.CURDRINK.COMBINED.regionleads;EUR.DBP.HEAVYvsLIGHT.COM…
rs4896643	6:143348864:C_G	AIG1	known	8521	6	143348864	c	g	0.4071	0.1271	0.0254	5.61711e-07	0.06539	0.05034	0.193955	-0.0006437	44.566	2.101e-10	1.56861e-07	750156	208336	+-+++	--++-	8	0.1304	ALL.PP.HEAVYvsLIGHT.COMBINED.locusleads	201.4	ALL.PP.HEAVYvsLIGHT.COMBINED.locusleads;ALL.PP.HEAVYvsLIGHT.FEMALE.locusleads
rs4406486	9:114174714:A_C	COL27A1	known	0	9	114174714	a	c	0.6864	0.1151	0.02603	9.78725e-06	0.06642	0.05122	0.194714	-0.0006764	36.399	1.247e-08	5.89045e-06	750568	208477	+++++	--++-	8	0.5492	ALL.PP.HEAVYvsLIGHT.COMBINED.locusleads	394.2	ALL.PP.CURDRINK.COMBINED.locusleads;ALL.PP.HEAVYvsLIGHT.COMBINED.locusleads;EUR.PP.HEAVYvsLIGHT.COMBINED.locusleads;EUR.PP.HEAVYvsLIGHT.COMBINED.regionleads
rs7338758	13:29563691:C_T	SLC7A1	known	0	13	29563691	t	c	0.3658	0.3724	0.04944	4.98304e-14	-0.07879	0.06082	0.195161	-0.002437	124.139	1.105e-27	9.20475e-24	1150380	768130	++++++	-+---+	10	0.6314	ALL.SBP.CURDRINK.COMBINED.locusleads	88.1	ALL.DBP.CURDRINK.COMBINED.locusleads;ALL.DBP.CURDRINK.COMBINED.regionleads;ALL.DBP.CURDRINK.FEMALE.locusleads;ALL.DBP.CURDRINK.FEMALE.regionleads;ALL.DBP.CURDRINK.MALE.locusleads;ALL.DBP.CURDRINK.MALE.regionleads;ALL.DBP.HEAVYvsLIGHT.COMBINED.locusleads;ALL.DBP.HEAVYvsLIGHT.COMBINED.regionleads;ALL.DBP.HEAVYvsLIGHT.MALE.locusleads;ALL.DBP.HEAVYvsLIGHT.MALE.regionleads;ALL.DBP.LIGHTvsNEVER.COMBINE…
rs7636126	3:47489061:A_G	ELP6	known	-6578	3	47489061	a	g	0.5513	-0.295	0.07889	0.000184472	-0.1535	0.1185	0.195197	-0.00613	38.641	6.472e-09	0.00353893	78225	33734	---+--+---+--+-----	+-+--++-+++-+-+--+-	36	0.3447	AFR.DBP.CURDRINK.COMBINED.regionleads	105.3	AFR.DBP.CURDRINK.COMBINED.locusleads;AFR.DBP.CURDRINK.COMBINED.regionleads
rs7628351	3:25380984:C_G	RARB	known	0	3	25380984	c	g	0.7912	0.1256	0.02678	2.73115e-06	0.06864	0.05311	0.196215	-0.000716	39.883	2.186e-09	1.18196e-06	723474	200999	+++-+	+++--	8	0.1701	ALL.DBP.HEAVYvsLIGHT.COMBINED.locusleads	542.1	ALL.DBP.CURDRINK.COMBINED.locusleads;ALL.DBP.CURDRINK.COMBINED.regionleads;ALL.DBP.HEAVYvsLIGHT.COMBINED.locusleads;ALL.DBP.HEAVYvsLIGHT.COMBINED.regionleads
rs11029039	11:1459408:C_G	BRSK2	known	0	11	1459408	c	g	0.6788	-0.07617	0.03804	0.0452454	-0.05621	0.04362	0.197527	-0.001447	42.42	2.007e-08	1.0868e-05	834263	631136	+++-+-+++-+-----?++-++-++---?++?-+-+--+++++----?-+--??+---++---	-----+---++++-+-?-+---+--+++?-+?+-+-++----++++-?+--+??-++++-+--	112	0.4511	EUR.DBP.CURDRINK.COMBINED.locusleads	29.12	ALL.DBP.CURDRINK.COMBINED.locusleads;EUR.DBP.CURDRINK.COMBINED.locusleads;EUR.DBP.HEAVYvsLIGHT.COMBINED.locusleads
rs10747570	12:50116154:A_G	COX14	known	0	12	50116154	a	g	0.3084	0.1442	0.03118	3.75033e-06	0.04773	0.03704	0.197535	-0.0009715	113.116	2.737e-25	1.79321e-21	1142360	765390	++++++	+--+++	10	0.7686	ALL.DBP.CURDRINK.COMBINED.regionleads	99.1	ALL.DBP.CURDRINK.COMBINED.locusleads;ALL.DBP.CURDRINK.COMBINED.regionleads;ALL.DBP.CURDRINK.FEMALE.locusleads;ALL.DBP.CURDRINK.FEMALE.regionleads;ALL.DBP.CURDRINK.MALE.locusleads;ALL.DBP.CURDRINK.MALE.regionleads;ALL.DBP.HEAVYvsLIGHT.COMBINED.locusleads;ALL.DBP.HEAVYvsLIGHT.COMBINED.regionleads;ALL.DBP.HEAVYvsLIGHT.FEMALE.locusleads;ALL.DBP.HEAVYvsLIGHT.FEMALE.regionleads;ALL.DBP.HEAVYvsLIGHT.MAL…
rs4466373	8:109073637:C_T	TRHR	known	-13786	8	109073637	t	c	0.2535	-0.1174	0.05023	0.0194263	-0.08049	0.06253	0.198017	-0.002522	33.624	4.995e-08	2.11629e-05	1142040	761354	+---+-	-+-+--	10	0.5215	ALL.SBP.CURDRINK.COMBINED.locusleads	264.2	ALL.SBP.CURDRINK.COMBINED.locusleads
rs934264	2:182461016:C_T	PDE1A	known	0	2	182461016	t	c	0.5126	-0.07913	0.02693	0.00329955	-0.04227	0.03284	0.198042	-0.0007245	50.113	1.313e-11	1.31558e-08	1147230	765150	----+-	-+---+	10	0.4393	ALL.DBP.CURDRINK.COMBINED.locusleads	109.4	ALL.DBP.CURDRINK.COMBINED.locusleads;ALL.DBP.CURDRINK.FEMALE.locusleads;ALL.DBP.HEAVYvsLIGHT.COMBINED.locusleads
rs616519	1:10707945:C_T	CASZ1	known	0	1	10707945	t	c	0.4458	0.3301	0.05333	6.02552e-10	-0.08202	0.0638	0.19859	-0.002836	87.423	1.038e-19	3.1936e-16	1141480	763591	+?++++	+?+---	8	0.638	ALL.SBP.CURDRINK.COMBINED.locusleads	19.2	ALL.DBP.CURDRINK.COMBINED.locusleads;ALL.DBP.CURDRINK.FEMALE.locusleads;ALL.DBP.CURDRINK.MALE.locusleads;ALL.DBP.HEAVYvsLIGHT.COMBINED.locusleads;ALL.DBP.HEAVYvsLIGHT.MALE.locusleads;ALL.DBP.HEAVYvsNEVER.COMBINED.locusleads;ALL.DBP.HEAVYvsNEVER.MALE.locusleads;ALL.DBP.LIGHTvsNEVER.COMBINED.locusleads;ALL.DBP.LIGHTvsNEVER.MALE.locusleads;ALL.PP.CURDRINK.COMBINED.locusleads;ALL.SBP.CURDRINK.COMBINE…
rs10719410	4:108174296:A_AT	LEF1-AS1	known	0	4	108174296	a	at	0.6435	-0.3998	0.08207	1.10782e-06	0.1235	0.09607	0.19861	-0.00673	54.147	5.61e-11	1.50367e-07	446557	327058	??+---+-+?--+?-???+-?+++-----+??--+??++-?--???+-????-+-	??-+-+---?+--?+???-+?----++++-??+--??--+?++???++????+-+	68	0.9437	EUR.SBP.CURDRINK.MALE.locusleads	419.1	ALL.DBP.CURDRINK.COMBINED.locusleads;ALL.DBP.CURDRINK.COMBINED.regionleads;ALL.SBP.CURDRINK.COMBINED.locusleads;ALL.SBP.CURDRINK.COMBINED.regionleads;ALL.SBP.CURDRINK.MALE.locusleads;ALL.SBP.CURDRINK.MALE.regionleads;EUR.DBP.CURDRINK.COMBINED.locusleads;EUR.DBP.CURDRINK.COMBINED.regionleads;EUR.DBP.CURDRINK.MALE.locusleads;EUR.DBP.CURDRINK.MALE.regionleads;EUR.SBP.CURDRINK.COMBINED.locusleads;EUR…
rs72786706	5:117929459:A_G	LOC102467224	novel-T3	0	5	117929459	a	g	0.1009	-1.903	0.3429	2.86123e-08	0.7749	0.6031	0.198841	-0.1164	35.743	1.731e-08	0.0196653	8843	2604	-?+---	+?++++	8	0.6096	HIS.PP.LIGHTvsNEVER.FEMALE.locusleads	658.1	HIS.PP.LIGHTvsNEVER.FEMALE.locusleads;HIS.PP.LIGHTvsNEVER.FEMALE.regionleads
rs115037960	6:151989035:C_T	ESR1	known	0	6	151989035	t	c	0.0225	0.2509	0.1157	0.0301177	0.1753	0.1368	0.200042	-0.01339	38.869	3.629e-09	2.33038e-06	1063100	730329	+?++++	-?-+--	8	0.2144	ALL.PP.CURDRINK.COMBINED.locusleads	44.4	ALL.PP.CURDRINK.COMBINED.locusleads;ALL.PP.LIGHTvsNEVER.MALE.locusleads
rs2240075	16:3485540:A_G	NAA60	known	0	16	3485540	a	g	0.6823	-0.1799	0.04706	0.000131956	-0.07478	0.05838	0.200222	-0.002212	68.634	1.248e-15	2.29617e-12	1147170	765120	----++	-++---	10	0.2172	ALL.SBP.CURDRINK.COMBINED.locusleads	154.2	ALL.DBP.CURDRINK.COMBINED.locusleads;ALL.DBP.CURDRINK.MALE.locusleads;ALL.DBP.HEAVYvsLIGHT.COMBINED.locusleads;ALL.DBP.HEAVYvsLIGHT.MALE.locusleads;ALL.DBP.HEAVYvsNEVER.COMBINED.locusleads;ALL.DBP.HEAVYvsNEVER.COMBINED.regionleads;ALL.PP.CURDRINK.COMBINED.locusleads;ALL.PP.CURDRINK.COMBINED.regionleads;ALL.PP.CURDRINK.MALE.locusleads;ALL.PP.CURDRINK.MALE.regionleads;ALL.PP.HEAVYvsLIGHT.MALE.locus…
rs80218197	19:11364038:C_T	LPPR2	known	0	19	11364038	t	c	0.034	-0.748	0.1318	1.38474e-08	0.2672	0.2092	0.201515	-0.01722	40.589	1.536e-09	9.32335e-07	492804	255537	-----?	+++-+?	8	0.7784	ALL.SBP.CURDRINK.COMBINED.locusleads	11.8	ALL.SBP.CURDRINK.COMBINED.locusleads
rs4937515	11:130398252:C_G	ADAMTS8	known	-6670	11	130398252	c	g	0.668	-0.3912	0.03737	1.20805e-25	-0.05624	0.04408	0.202004	-0.001395	472.815	2.14e-103	4.30857e-97	1138350	763814	------	----+-	10	0.76	ALL.PP.CURDRINK.COMBINED.locusleads	4.1	ALL.DBP.CURDRINK.COMBINED.locusleads;ALL.DBP.CURDRINK.COMBINED.regionleads;ALL.DBP.CURDRINK.FEMALE.locusleads;ALL.DBP.CURDRINK.FEMALE.regionleads;ALL.DBP.CURDRINK.MALE.locusleads;ALL.DBP.CURDRINK.MALE.regionleads;ALL.DBP.HEAVYvsLIGHT.COMBINED.locusleads;ALL.DBP.HEAVYvsLIGHT.COMBINED.regionleads;ALL.DBP.HEAVYvsLIGHT.MALE.locusleads;ALL.DBP.HEAVYvsLIGHT.MALE.regionleads;ALL.DBP.HEAVYvsNEVER.COMBINE…
rs2307111	5:75707853:C_T	POC5	known	0	5	75707853	t	c	0.5404	0.1613	0.03103	2.01233e-07	-0.04848	0.03805	0.202623	-0.0009611	52.937	3.198e-12	3.64468e-09	1145060	764275	++++++	--+---	10	0.9012	ALL.PP.CURDRINK.COMBINED.regionleads	351.1	ALL.DBP.CURDRINK.COMBINED.locusleads;ALL.DBP.CURDRINK.COMBINED.regionleads;ALL.DBP.HEAVYvsNEVER.COMBINED.locusleads;ALL.DBP.HEAVYvsNEVER.COMBINED.regionleads;ALL.PP.CURDRINK.COMBINED.locusleads;ALL.PP.CURDRINK.COMBINED.regionleads
rs2907166	1:242979196:A_G	LOC731275	known	-77117	1	242979196	a	g	0.6303	-0.1157	0.02315	5.7976e-07	-0.05834	0.04584	0.203129	-0.000535	44.272	2.435e-10	1.6938e-07	720603	200266	-+---	---++	8	0.8037	ALL.DBP.HEAVYvsLIGHT.COMBINED.locusleads	62.4	ALL.DBP.CURDRINK.COMBINED.locusleads;ALL.DBP.CURDRINK.MALE.locusleads;ALL.DBP.HEAVYvsLIGHT.COMBINED.locusleads
rs7257330	19:29810916:A_G	CCNE1	known	-1077	19	29810916	a	g	0.3278	0.1427	0.03092	3.92838e-06	0.04673	0.03672	0.203159	-0.0009556	112.431	3.854e-25	2.50547e-21	1142590	764004	+-++++	-+-++-	10	0.4845	ALL.DBP.CURDRINK.COMBINED.locusleads	100.1	ALL.DBP.CURDRINK.COMBINED.locusleads;ALL.DBP.CURDRINK.COMBINED.regionleads;ALL.DBP.CURDRINK.FEMALE.locusleads;ALL.DBP.CURDRINK.FEMALE.regionleads;ALL.DBP.CURDRINK.MALE.locusleads;ALL.DBP.CURDRINK.MALE.regionleads;ALL.DBP.HEAVYvsLIGHT.COMBINED.locusleads;ALL.DBP.HEAVYvsLIGHT.COMBINED.regionleads;ALL.DBP.HEAVYvsLIGHT.FEMALE.locusleads;ALL.DBP.HEAVYvsLIGHT.FEMALE.regionleads;ALL.DBP.HEAVYvsLIGHT.MAL…
rs11062218	12:2410192:C_T	CACNA1C	known	0	12	2410192	t	c	0.3609	0.0805	0.02729	0.00317981	0.04245	0.03338	0.203473	-0.0007442	49.503	1.781e-11	1.7346e-08	1147210	765142	+-++-+	-++++-	10	0.433	ALL.DBP.CURDRINK.COMBINED.regionleads	386.1	ALL.DBP.CURDRINK.COMBINED.locusleads;ALL.DBP.CURDRINK.COMBINED.regionleads;ALL.DBP.HEAVYvsLIGHT.COMBINED.locusleads;ALL.DBP.HEAVYvsLIGHT.COMBINED.regionleads;ALL.DBP.LIGHTvsNEVER.COMBINED.locusleads;ALL.DBP.LIGHTvsNEVER.COMBINED.regionleads;EUR.DBP.CURDRINK.COMBINED.locusleads;EUR.DBP.CURDRINK.COMBINED.regionleads;EUR.DBP.HEAVYvsLIGHT.COMBINED.locusleads;EUR.DBP.HEAVYvsLIGHT.COMBINED.regionleads
rs3897821	1:243257086:A_G	SDCCAG8	known	0	1	243257086	a	g	0.6937	-0.1727	0.02944	4.45981e-09	-0.04529	0.03562	0.203559	-0.000866	151.968	1.001e-33	1.1477e-29	1133440	757664	------	+-+---	10	0.7433	ALL.DBP.CURDRINK.COMBINED.locusleads	62.1	ALL.DBP.CURDRINK.COMBINED.locusleads;ALL.DBP.CURDRINK.COMBINED.regionleads;ALL.DBP.CURDRINK.FEMALE.locusleads;ALL.DBP.CURDRINK.FEMALE.regionleads;ALL.DBP.CURDRINK.MALE.locusleads;ALL.DBP.CURDRINK.MALE.regionleads;ALL.DBP.HEAVYvsLIGHT.COMBINED.locusleads;ALL.DBP.HEAVYvsLIGHT.COMBINED.regionleads;ALL.DBP.HEAVYvsLIGHT.FEMALE.locusleads;ALL.DBP.HEAVYvsLIGHT.FEMALE.regionleads;ALL.DBP.HEAVYvsLIGHT.MAL…
rs6416715	16:71052252:A_G	HYDIN	known	0	16	71052252	a	g	0.1497	0.1343	0.05232	0.0102613	0.07746	0.06097	0.203921	-0.002735	52.061	4.955e-12	5.47328e-09	1108970	752468	+?++-+	+?-+++	8	0.4962	ALL.PP.CURDRINK.COMBINED.locusleads	22.5	ALL.PP.CURDRINK.COMBINED.locusleads;ALL.PP.CURDRINK.FEMALE.locusleads;ALL.PP.HEAVYvsLIGHT.COMBINED.locusleads;ALL.PP.LIGHTvsNEVER.COMBINED.locusleads;ALL.SBP.CURDRINK.COMBINED.locusleads;EUR.PP.CURDRINK.COMBINED.locusleads;EUR.PP.HEAVYvsLIGHT.COMBINED.locusleads
rs9832113	3:154304045:C_T	DHX36	known	0	3	154304045	t	c	0.7986	0.07157	0.03655	0.0502136	0.05467	0.04305	0.204114	-0.001335	34.439	3.325e-08	1.49887e-05	1140200	763590	+++++-	---+++	10	0.3522	ALL.DBP.CURDRINK.COMBINED.locusleads	716.1	ALL.DBP.CURDRINK.COMBINED.locusleads;ALL.DBP.CURDRINK.COMBINED.regionleads
rs2764378	10:94372349:C_T	NOC3L	known	9423	10	94372349	t	c	0.3492	0.1147	0.02822	4.81369e-05	0.04354	0.0343	0.204303	-0.0007957	82.03	1.539e-18	5.11479e-15	1137700	761983	+-++++	+++++-	10	0.2632	ALL.DBP.CURDRINK.COMBINED.locusleads	46.4	ALL.DBP.CURDRINK.COMBINED.locusleads;ALL.DBP.CURDRINK.FEMALE.locusleads;ALL.DBP.CURDRINK.MALE.locusleads;ALL.DBP.HEAVYvsLIGHT.COMBINED.locusleads;ALL.DBP.HEAVYvsLIGHT.MALE.locusleads;ALL.DBP.HEAVYvsNEVER.COMBINED.locusleads;ALL.DBP.HEAVYvsNEVER.MALE.locusleads;ALL.DBP.LIGHTvsNEVER.COMBINED.locusleads;ALL.SBP.CURDRINK.COMBINED.locusleads;ALL.SBP.CURDRINK.MALE.locusleads;ALL.SBP.HEAVYvsLIGHT.COMBIN…
rs17733323	8:9519019:C_G	TNKS	known	-36915	8	9519019	c	g	0.8409	-0.2739	0.0632	1.46517e-05	0.09622	0.07589	0.204838	-0.003975	35.993	1.528e-08	7.37404e-06	1144660	765435	-+---+	+--++-	10	0.5782	ALL.SBP.CURDRINK.COMBINED.locusleads	97.39	ALL.SBP.CURDRINK.COMBINED.locusleads;EUR.SBP.CURDRINK.MALE.locusleads
rs11652757	17:2130981:C_T	SMG6	known	0	17	2130981	t	c	0.3353	-0.1776	0.05432	0.00107732	-0.08128	0.06424	0.20578	-0.002946	67.104	2.683e-15	4.6516e-12	1080770	725600	------	-++-+-	10	0.2319	ALL.SBP.CURDRINK.COMBINED.locusleads	234.1	ALL.DBP.CURDRINK.COMBINED.locusleads;ALL.DBP.CURDRINK.COMBINED.regionleads;ALL.DBP.CURDRINK.MALE.locusleads;ALL.DBP.CURDRINK.MALE.regionleads;ALL.DBP.HEAVYvsLIGHT.COMBINED.locusleads;ALL.DBP.HEAVYvsLIGHT.COMBINED.regionleads;ALL.PP.CURDRINK.COMBINED.locusleads;ALL.PP.CURDRINK.COMBINED.regionleads;ALL.PP.HEAVYvsLIGHT.COMBINED.locusleads;ALL.PP.LIGHTvsNEVER.COMBINED.locusleads;ALL.PP.LIGHTvsNEVER.C…
rs77152757	5:132099237:C_CT	CSF2	known	23067	5	132099237	ct	c	0.2295	-0.1073	0.0359	0.00280022	-0.05787	0.0458	0.206396	-0.001288	42.522	5.839e-10	4.4177e-07	1050440	692556	+?----	-?--+-	8	0.7024	ALL.PP.CURDRINK.COMBINED.locusleads	179.2	ALL.PP.CURDRINK.COMBINED.locusleads;ALL.PP.CURDRINK.COMBINED.regionleads;ALL.PP.HEAVYvsLIGHT.COMBINED.locusleads;ALL.PP.HEAVYvsLIGHT.COMBINED.regionleads;ALL.PP.LIGHTvsNEVER.COMBINED.locusleads;ALL.PP.LIGHTvsNEVER.COMBINED.regionleads
rs509239	11:1863887:A_T	LSP1	known	0	11	1863887	a	t	0.374	-0.2697	0.04708	1.01294e-08	-0.07237	0.05732	0.206747	-0.002215	141.835	1.588e-31	1.88628e-27	1143920	763119	+-----	-++--+	10	0.005058	ALL.SBP.CURDRINK.COMBINED.locusleads	29.2	ALL.DBP.CURDRINK.COMBINED.locusleads;ALL.DBP.CURDRINK.FEMALE.locusleads;ALL.DBP.CURDRINK.MALE.locusleads;ALL.DBP.HEAVYvsNEVER.COMBINED.locusleads;ALL.PP.CURDRINK.COMBINED.locusleads;ALL.PP.CURDRINK.FEMALE.locusleads;ALL.PP.CURDRINK.MALE.locusleads;ALL.PP.HEAVYvsLIGHT.COMBINED.locusleads;ALL.PP.HEAVYvsLIGHT.MALE.locusleads;ALL.PP.HEAVYvsNEVER.COMBINED.locusleads;ALL.PP.HEAVYvsNEVER.MALE.locusleads…
rs331095	5:128375594:C_T	FBN2	known	0	5	128375594	t	c	0.624	0.2499	0.05309	2.51264e-06	-0.079	0.06271	0.207753	-0.002815	48.134	3.531e-11	3.00679e-08	1053480	731649	+-++-+	------	10	0.0003242	ALL.SBP.CURDRINK.COMBINED.locusleads	84.3	ALL.DBP.CURDRINK.COMBINED.locusleads;ALL.PP.HEAVYvsLIGHT.COMBINED.locusleads;ALL.SBP.CURDRINK.COMBINED.locusleads;ALL.SBP.HEAVYvsLIGHT.COMBINED.locusleads;EUR.PP.HEAVYvsLIGHT.COMBINED.locusleads
rs73689865	7:40845759:A_T	SUGCT	known	0	7	40845759	a	t	0.0948	0.2413	0.05862	3.84932e-05	-0.08701	0.0691	0.207962	-0.003433	34.581	3.097e-08	1.56836e-05	1134190	762443	-++++-	+-----	10	0.6911	ALL.PP.CURDRINK.COMBINED.locusleads	93.3	ALL.PP.CURDRINK.COMBINED.locusleads
rs111293791	17:77360650:C_T	2009-09-01	known	0	17	77360650	t	c	0.2929	-0.07024	0.03351	0.0360741	-0.05004	0.03978	0.208421	-0.001121	35.612	1.849e-08	8.97702e-06	969791	688514	+-+-+-	-+-+-+	10	0.3151	ALL.DBP.CURDRINK.COMBINED.locusleads	141.3	ALL.DBP.CURDRINK.COMBINED.locusleads
rs34243936	11:130466056:A_G	ADAMTS15	known	0	11	130466056	a	g	0.3632	0.2039	0.03424	2.60035e-09	-0.05159	0.04104	0.20873	-0.001171	80.312	3.635e-18	9.55296e-15	1136200	761046	++++++	---+-+	10	0.03288	ALL.PP.CURDRINK.COMBINED.locusleads	4.5	ALL.PP.CURDRINK.COMBINED.locusleads;ALL.PP.CURDRINK.FEMALE.locusleads;ALL.PP.CURDRINK.MALE.locusleads;ALL.PP.HEAVYvsLIGHT.COMBINED.locusleads;ALL.PP.HEAVYvsNEVER.COMBINED.locusleads;ALL.PP.LIGHTvsNEVER.COMBINED.locusleads;ALL.PP.LIGHTvsNEVER.FEMALE.locusleads;EUR.PP.LIGHTvsNEVER.COMBINED.locusleads
rs2957181	11:57128212:C_T	LRRC55	known	-53534	11	57128212	t	c	0.939	0.4027	0.09609	2.77896e-05	-0.1447	0.1152	0.209088	-0.009221	33.867	4.424e-08	1.90004e-05	1129060	758403	+-+++-	-++--+	10	0.01358	ALL.SBP.CURDRINK.COMBINED.locusleads	118.4	ALL.SBP.CURDRINK.COMBINED.locusleads
rs36106790	11:111704910:C_CT	SIK2	known	0	11	111704910	ct	c	0.2443	0.2647	0.04472	3.23803e-09	-0.1065	0.08484	0.209368	-0.001997	39.843	2.229e-09	4.3379e-06	249052	70757	+++-+	+--+-	8	0.07668	ALL.DBP.HEAVYvsLIGHT.FEMALE.regionleads	543.1	ALL.DBP.CURDRINK.COMBINED.locusleads;ALL.DBP.CURDRINK.FEMALE.locusleads;ALL.DBP.CURDRINK.FEMALE.regionleads;ALL.DBP.HEAVYvsLIGHT.FEMALE.locusleads;ALL.DBP.HEAVYvsLIGHT.FEMALE.regionleads;ALL.SBP.CURDRINK.FEMALE.locusleads;ALL.SBP.CURDRINK.FEMALE.regionleads;ALL.SBP.HEAVYvsLIGHT.FEMALE.locusleads;ALL.SBP.HEAVYvsLIGHT.FEMALE.regionleads
rs2968857	7:150965242:C_T	KCNH2	known	0	7	150965242	t	c	0.6765	-0.1098	0.0305	0.000318217	-0.04558	0.03638	0.210247	-0.0009294	74.026	8.423e-17	2.24823e-13	1147970	767868	-----+	+-+-+-	10	0.004197	ALL.DBP.CURDRINK.COMBINED.locusleads	27.3	ALL.DBP.CURDRINK.COMBINED.locusleads;ALL.DBP.CURDRINK.FEMALE.locusleads;ALL.DBP.CURDRINK.MALE.locusleads;ALL.DBP.HEAVYvsLIGHT.COMBINED.locusleads;ALL.DBP.HEAVYvsLIGHT.FEMALE.locusleads;ALL.DBP.HEAVYvsLIGHT.MALE.locusleads;ALL.DBP.LIGHTvsNEVER.COMBINED.locusleads;EUR.DBP.CURDRINK.COMBINED.locusleads;EUR.DBP.CURDRINK.MALE.locusleads;EUR.DBP.HEAVYvsLIGHT.COMBINED.locusleads;EUR.DBP.HEAVYvsLIGHT.FEMA…
rs10459542	14:72918188:C_T	DCAF4	known	-8143	14	72918188	t	c	0.3661	0.1518	0.02682	1.51412e-08	0.06633	0.053	0.210749	-0.0007184	54.771	4.543e-11	5.86872e-08	631957	176012	-+---+--+-+-++?+--+++++----++---+-++-++++--+---??-++++++++	+-++++++---+++?--++-+-+++++--++---+-++++++--+-+??-+---+--+	108	0.6974	EUR.PP.HEAVYvsLIGHT.COMBINED.locusleads	251.2	ALL.PP.CURDRINK.COMBINED.locusleads;ALL.PP.HEAVYvsLIGHT.COMBINED.locusleads;ALL.PP.HEAVYvsLIGHT.COMBINED.regionleads;ALL.PP.HEAVYvsLIGHT.FEMALE.locusleads;ALL.PP.HEAVYvsLIGHT.FEMALE.regionleads;EUR.PP.HEAVYvsLIGHT.COMBINED.locusleads;EUR.PP.HEAVYvsLIGHT.COMBINED.regionleads;EUR.PP.HEAVYvsLIGHT.FEMALE.locusleads;EUR.PP.HEAVYvsLIGHT.FEMALE.regionleads
rs10736586	11:130598201:C_T	MIR8052	known	-68533	11	130598201	t	c	0.6583	0.1325	0.0321	3.66369e-05	0.04924	0.03935	0.210813	-0.00103	80.561	3.209e-18	8.48435e-15	1147070	765089	+-+++-	-+++-+	10	0.4543	ALL.PP.CURDRINK.COMBINED.locusleads	4.4	ALL.PP.CURDRINK.COMBINED.locusleads;ALL.PP.CURDRINK.MALE.locusleads;ALL.PP.HEAVYvsLIGHT.COMBINED.locusleads;ALL.PP.HEAVYvsLIGHT.MALE.locusleads;ALL.PP.LIGHTvsNEVER.COMBINED.locusleads;ALL.PP.LIGHTvsNEVER.MALE.locusleads;ALL.SBP.CURDRINK.COMBINED.locusleads;EUR.PP.CURDRINK.COMBINED.locusleads;EUR.PP.CURDRINK.MALE.locusleads;EUR.PP.HEAVYvsLIGHT.COMBINED.locusleads;EUR.PP.HEAVYvsLIGHT.MALE.locuslead…
rs13253670	8:75758405:G_T	HNF4G	known	191579	8	75758405	t	g	0.1481	0.3664	0.07554	1.23206e-06	-0.1087	0.08691	0.211037	-0.005704	59.385	1.273e-13	4.16399e-10	538784	383929	++?+++	-+?--+	8	0.08752	ALL.PP.CURDRINK.MALE.locusleads	68.3	ALL.PP.CURDRINK.COMBINED.locusleads;ALL.PP.CURDRINK.MALE.locusleads;ALL.SBP.CURDRINK.COMBINED.locusleads;ALL.SBP.CURDRINK.MALE.locusleads;ALL.SBP.HEAVYvsLIGHT.COMBINED.locusleads;EUR.SBP.LIGHTvsNEVER.COMBINED.locusleads
rs2957468	8:105313132:A_G	ZFPM2	known	-5786	8	105313132	a	g	0.3067	0.2309	0.05123	6.5712e-06	-0.07648	0.06141	0.212985	-0.002623	40.978	1.264e-09	7.82088e-07	1145450	764959	-+++++	++--+-	10	0.2371	ALL.SBP.CURDRINK.COMBINED.locusleads	188.2	ALL.DBP.CURDRINK.COMBINED.locusleads;ALL.DBP.LIGHTvsNEVER.COMBINED.locusleads;ALL.DBP.LIGHTvsNEVER.COMBINED.regionleads;ALL.SBP.CURDRINK.COMBINED.locusleads;EUR.SBP.CURDRINK.COMBINED.locusleads
rs80111044	4:80246950:A_G	FGF5	known	-19637	4	80246950	a	g	0.8639	0.1746	0.03687	2.18454e-06	0.0587	0.04718	0.213437	-0.001358	84.881	3.702e-19	1.31523e-15	1145050	763729	+-+++-	-+++++	10	0.0516	ALL.DBP.CURDRINK.COMBINED.locusleads	2.4	ALL.DBP.CURDRINK.COMBINED.locusleads;ALL.DBP.CURDRINK.FEMALE.locusleads;ALL.DBP.CURDRINK.MALE.locusleads;ALL.DBP.HEAVYvsLIGHT.COMBINED.locusleads;ALL.DBP.HEAVYvsLIGHT.FEMALE.locusleads;ALL.DBP.HEAVYvsLIGHT.MALE.locusleads;ALL.DBP.LIGHTvsNEVER.COMBINED.locusleads;ALL.DBP.LIGHTvsNEVER.MALE.locusleads;ALL.SBP.CURDRINK.COMBINED.locusleads;ALL.SBP.CURDRINK.FEMALE.locusleads;ALL.SBP.CURDRINK.MALE.locus…
rs113789029	6:43385897:A_T	ZNF318	known	16454	6	43385897	a	t	0.063	0.3961	0.08795	6.67819e-06	-0.1369	0.1101	0.213715	-0.007726	35.474	1.981e-08	9.28662e-06	1134320	759371	-+++++	+-+--+	10	0.2325	ALL.SBP.CURDRINK.COMBINED.locusleads	43.6	ALL.SBP.CURDRINK.COMBINED.locusleads
rs144978766	5:156699993:C_CAAAAG	SGCD	known	0	5	156699993	caaaag	c	0.7368	-0.2144	0.0509	2.52917e-05	0.07271	0.0585	0.213902	-0.002591	41.817	2.45e-08	1.26238e-05	755241	567124	??-++--+-+?+++?-???--?--------+-???----??-++?--???--?????---+--	??---++-+-?--+?+???-+?+++++++++-???-+-+??-+-?-+???+-?????+++-++	80	0.5194	EUR.PP.CURDRINK.COMBINED.locusleads	599.2	EUR.PP.CURDRINK.COMBINED.locusleads;EUR.PP.CURDRINK.COMBINED.regionleads
rs2285516	16:20919825:A_G	LYRM1	known	0	16	20919825	a	g	0.524	0.223	0.04779	3.06749e-06	-0.07159	0.05761	0.213991	-0.002281	43.7	3.241e-10	2.27349e-07	1147300	766128	++++++	--+-+-	10	0.3239	ALL.SBP.CURDRINK.COMBINED.locusleads	480.1	ALL.SBP.CURDRINK.COMBINED.locusleads;ALL.SBP.CURDRINK.MALE.locusleads;ALL.SBP.CURDRINK.MALE.regionleads
rs376826665	20:10436364:C_CT	SLX4IP	known	0	20	10436364	ct	c	0.5013	0.1327	0.02995	9.39199e-06	-0.0463	0.03731	0.214623	-0.0008952	34.505	3.216e-08	1.45645e-05	1000020	651475	+?++++	+?---+	8	0.08857	ALL.DBP.CURDRINK.COMBINED.locusleads	20.26	ALL.DBP.CURDRINK.COMBINED.locusleads
rs35144677	6:126789018:C_G	MIR588	known	304305	6	126789018	c	g	0.082	0.4299	0.1069	5.78249e-05	-0.1526	0.123	0.214735	-0.01141	36.767	1.038e-08	5.23048e-06	921895	663661	+??+++	-??-+-	6	0.2481	ALL.SBP.CURDRINK.COMBINED.locusleads	21.7	ALL.SBP.CURDRINK.COMBINED.locusleads
rs6541006	1:11797469:A_T	MTHFR	known	0	1	11797469	a	t	0.067	-0.3985	0.09603	3.32846e-05	-0.1464	0.1181	0.215113	-0.009195	79.096	6.675e-18	1.66205e-14	1044450	727495	------	+++-+-	10	6.67e-06	ALL.SBP.CURDRINK.COMBINED.locusleads	15.5	ALL.DBP.CURDRINK.FEMALE.locusleads;ALL.DBP.HEAVYvsLIGHT.COMBINED.locusleads;ALL.DBP.HEAVYvsLIGHT.FEMALE.locusleads;ALL.DBP.LIGHTvsNEVER.COMBINED.locusleads;ALL.DBP.LIGHTvsNEVER.FEMALE.locusleads;ALL.PP.HEAVYvsLIGHT.COMBINED.locusleads;ALL.SBP.CURDRINK.COMBINED.locusleads;ALL.SBP.CURDRINK.FEMALE.locusleads;ALL.SBP.CURDRINK.MALE.locusleads;ALL.SBP.HEAVYvsLIGHT.COMBINED.locusleads;ALL.SBP.HEAVYvsLIG…
rs12300674	12:15117770:C_G	RERG	known	0	12	15117770	c	g	0.2221	0.09726	0.03397	0.00419499	0.05084	0.04102	0.215199	-0.001153	49.532	1.755e-11	1.7121e-08	1131040	760000	-?++-+	+?-++-	8	0.567	ALL.DBP.CURDRINK.COMBINED.locusleads	385.1	ALL.DBP.CURDRINK.COMBINED.locusleads;ALL.DBP.CURDRINK.COMBINED.regionleads;ALL.DBP.CURDRINK.MALE.locusleads;ALL.DBP.CURDRINK.MALE.regionleads;ALL.DBP.HEAVYvsLIGHT.COMBINED.locusleads;ALL.DBP.HEAVYvsLIGHT.COMBINED.regionleads;EUR.DBP.CURDRINK.COMBINED.locusleads;EUR.DBP.CURDRINK.COMBINED.regionleads;EUR.DBP.CURDRINK.MALE.locusleads;EUR.DBP.CURDRINK.MALE.regionleads;EUR.DBP.HEAVYvsLIGHT.COMBINED.lo…
rs1995496	2:241505921:A_G	STK25	known	0	2	241505921	a	g	0.5007	-0.1772	0.04232	2.82485e-05	0.05963	0.04812	0.215274	-0.00179	43.797	1.078e-08	6.06576e-06	843486	637808	++----+-+-++--+++-------+-+----+-++------++-+--+-------+----+--	--+--+-+-++--+-+-+-++++--+--+++-+-++-+---+-+-++-+--++++-+-+--++	124	0.07481	EUR.PP.CURDRINK.COMBINED.regionleads	628.1	ALL.PP.CURDRINK.COMBINED.locusleads;ALL.PP.CURDRINK.COMBINED.regionleads;EUR.PP.CURDRINK.COMBINED.locusleads;EUR.PP.CURDRINK.COMBINED.regionleads
rs635954	1:168720053:A_C	DPT	known	0	1	168720053	a	c	0.3321	-0.1437	0.03154	5.21074e-06	0.04883	0.03941	0.215336	-0.000994	36.759	1.042e-08	5.95506e-06	1148350	766154	-+---+	+-+++-	10	0.9844	ALL.PP.CURDRINK.COMBINED.locusleads	115.3	ALL.PP.CURDRINK.COMBINED.locusleads
rs10184004	2:164651879:C_T	COBLL1	known	-28305	2	164651879	t	c	0.3768	-0.1578	0.0503	0.00170583	-0.07401	0.05995	0.217006	-0.002523	59.558	1.167e-13	1.55955e-10	1148150	767738	------	++--+-	10	0.5345	ALL.SBP.CURDRINK.COMBINED.locusleads	18.7	ALL.PP.CURDRINK.COMBINED.locusleads;ALL.PP.HEAVYvsLIGHT.COMBINED.locusleads;ALL.SBP.CURDRINK.COMBINED.locusleads;ALL.SBP.CURDRINK.FEMALE.locusleads;ALL.SBP.HEAVYvsLIGHT.COMBINED.locusleads;ALL.SBP.LIGHTvsNEVER.COMBINED.locusleads;EAS.DBP.CURDRINK.COMBINED.locusleads;EUR.PP.HEAVYvsLIGHT.COMBINED.locusleads;EUR.SBP.CURDRINK.COMBINED.locusleads;EUR.SBP.HEAVYvsLIGHT.COMBINED.locusleads
rs465002	5:56512648:C_T	LOC101928448	known	0	5	56512648	t	c	0.6835	0.1852	0.03193	6.62406e-09	-0.04927	0.03992	0.217122	-0.001018	65.556	5.817e-15	1.01894e-11	1148390	766175	+-++++	-+----	10	0.8633	ALL.PP.CURDRINK.COMBINED.locusleads	244.1	ALL.PP.CURDRINK.COMBINED.locusleads;ALL.PP.CURDRINK.COMBINED.regionleads;ALL.PP.CURDRINK.FEMALE.locusleads;ALL.PP.CURDRINK.FEMALE.regionleads;ALL.PP.HEAVYvsLIGHT.COMBINED.locusleads;ALL.PP.HEAVYvsNEVER.COMBINED.locusleads;ALL.PP.HEAVYvsNEVER.COMBINED.regionleads;ALL.PP.LIGHTvsNEVER.COMBINED.locusleads;ALL.PP.LIGHTvsNEVER.COMBINED.regionleads;ALL.PP.LIGHTvsNEVER.FEMALE.locusleads;ALL.PP.LIGHTvsNEV…
rs141094380	20:10654010:C_CA	JAG1	known	0	20	10654010	ca	c	0.9356	0.3924	0.07212	5.30026e-08	-0.1065	0.08634	0.217391	-0.005194	65.529	5.896e-15	1.03188e-11	1020350	677981	+?-+++	-?+---	8	0.2671	ALL.PP.CURDRINK.COMBINED.locusleads	20.14	ALL.PP.CURDRINK.COMBINED.locusleads;ALL.PP.CURDRINK.MALE.locusleads;ALL.PP.HEAVYvsLIGHT.COMBINED.locusleads;ALL.PP.HEAVYvsLIGHT.MALE.locusleads;ALL.PP.LIGHTvsNEVER.COMBINED.locusleads;EUR.PP.CURDRINK.COMBINED.locusleads;EUR.PP.CURDRINK.MALE.locusleads;EUR.PP.HEAVYvsLIGHT.COMBINED.locusleads;EUR.PP.LIGHTvsNEVER.COMBINED.locusleads
rs62376956	5:173927044:A_G	CPEB4	known	0	5	173927044	a	g	0.1318	0.2122	0.04935	1.70876e-05	-0.07221	0.05857	0.217619	-0.002434	38.073	5.402e-09	3.3174e-06	1134670	762239	++++++	------	10	0.9135	ALL.PP.CURDRINK.COMBINED.locusleads	103.2	ALL.PP.CURDRINK.COMBINED.locusleads;ALL.PP.CURDRINK.COMBINED.regionleads
rs78768460	20:19494023:A_G	SLC24A3	known	0	20	19494023	a	g	0.0638	-0.2732	0.05355	3.36484e-07	-0.1306	0.106	0.217921	-0.002865	45.475	1.334e-10	1.04598e-07	656917	178990	-?---	-?--+	6	0.8616	ALL.PP.HEAVYvsLIGHT.COMBINED.locusleads	53.4	ALL.PP.CURDRINK.COMBINED.locusleads;ALL.PP.CURDRINK.MALE.locusleads;ALL.PP.HEAVYvsLIGHT.COMBINED.locusleads;ALL.PP.HEAVYvsLIGHT.MALE.locusleads;EUR.PP.CURDRINK.COMBINED.locusleads;EUR.PP.HEAVYvsLIGHT.COMBINED.locusleads;EUR.PP.HEAVYvsLIGHT.MALE.locusleads
rs726857	2:144995857:A_T	TEX41	known	0	2	144995857	a	t	0.4685	0.09526	0.03059	0.00184513	0.04486	0.03644	0.218299	-0.000933	58.853	1.661e-13	2.42947e-10	1138790	763792	++-++-	+--+++	10	0.4266	ALL.DBP.CURDRINK.COMBINED.locusleads	128.3	ALL.DBP.CURDRINK.COMBINED.locusleads;ALL.DBP.HEAVYvsLIGHT.COMBINED.locusleads
rs62065308	16:58660709:A_G	SLC38A7	known	-5684	16	58660709	a	g	0.8006	0.1771	0.04037	1.14967e-05	-0.06027	0.04897	0.218415	-0.001629	36.962	9.414e-09	5.4427e-06	1081470	725581	+-+++-	-----+	10	0.8015	ALL.PP.CURDRINK.COMBINED.locusleads	133.2	ALL.PP.CURDRINK.COMBINED.locusleads;ALL.PP.LIGHTvsNEVER.COMBINED.locusleads
rs460089	5:132294079:C_G	SLC22A4	known	-372	5	132294079	c	g	0.3077	0.06567	0.02878	0.0225016	0.04326	0.03519	0.218949	-0.0008278	34.077	3.983e-08	1.75317e-05	1144950	764617	++-++-	+---++	10	0.01662	ALL.DBP.CURDRINK.COMBINED.locusleads	179.4	ALL.DBP.CURDRINK.COMBINED.locusleads
rs4842266	12:79557786:A_G	PAWR	known	-34178	12	79557786	a	g	0.5827	-0.1438	0.03302	1.33106e-05	-0.0499	0.0406	0.219048	-0.001086	84.811	3.833e-19	1.11022e-15	1139790	760681	+----+	++----	10	0.2305	ALL.PP.CURDRINK.COMBINED.regionleads	152.1	ALL.PP.CURDRINK.COMBINED.locusleads;ALL.PP.CURDRINK.COMBINED.regionleads;ALL.PP.CURDRINK.FEMALE.locusleads;ALL.PP.CURDRINK.FEMALE.regionleads;ALL.PP.CURDRINK.MALE.locusleads;ALL.PP.CURDRINK.MALE.regionleads;ALL.PP.HEAVYvsLIGHT.COMBINED.locusleads;ALL.PP.HEAVYvsLIGHT.COMBINED.regionleads;ALL.PP.HEAVYvsLIGHT.FEMALE.locusleads;ALL.PP.HEAVYvsLIGHT.FEMALE.regionleads;ALL.PP.HEAVYvsLIGHT.MALE.locuslead…
rs34204266	10:63350280:C_T	JMJD1C	known	0	10	63350280	t	c	0.7618	-0.09488	0.03519	0.00701312	-0.05038	0.04118	0.221175	-0.001237	53.009	3.084e-12	3.54364e-09	1136720	763510	++---+	--+---	10	0.8889	ALL.DBP.CURDRINK.COMBINED.locusleads	134.4	ALL.DBP.CURDRINK.COMBINED.locusleads;ALL.DBP.HEAVYvsLIGHT.COMBINED.locusleads
rs7207047	17:45121631:A_G	PLCD3	known	0	17	45121631	a	g	0.3565	-0.2324	0.04776	1.13881e-06	0.07059	0.05772	0.22134	-0.002279	48.416	3.066e-11	2.63917e-08	1150440	768083	-----+	+++++-	10	0.3764	ALL.SBP.CURDRINK.COMBINED.locusleads	41.23	ALL.SBP.CURDRINK.COMBINED.locusleads
rs13029343	2:163852229:C_T	FIGN	known	116226	2	163852229	t	c	0.6475	0.172	0.02545	1.39572e-11	-0.06114	0.05	0.221405	-0.000647	52.256	4.494e-12	4.87044e-09	751278	208591	+++++	-----	8	0.5364	ALL.PP.HEAVYvsLIGHT.COMBINED.locusleads	18.9	ALL.PP.HEAVYvsLIGHT.COMBINED.locusleads
rs6017308	20:44270700:A_G	GDAP1L1	known	0	20	44270700	a	g	0.18	-0.2992	0.07073	2.33514e-05	0.1009	0.08253	0.221486	-0.004999	39.521	2.619e-09	1.51298e-06	969521	689329	--?-++	++?+-+	8	0.8658	ALL.SBP.CURDRINK.COMBINED.locusleads	75.5	ALL.SBP.CURDRINK.COMBINED.locusleads
rs13355146	5:92687954:C_T	NR2F1-AS1	known	-721401	5	92687954	t	c	0.3963	0.1271	0.02184	5.89897e-09	-0.05238	0.04288	0.221878	-0.0004768	37.969	5.691e-09	2.70266e-06	750547	208477	++++-	+---+	8	0.4937	ALL.DBP.HEAVYvsLIGHT.COMBINED.locusleads	339.2	ALL.DBP.CURDRINK.COMBINED.locusleads;ALL.DBP.HEAVYvsLIGHT.COMBINED.locusleads
rs2521879	17:64746560:A_G	LOC146880	known	-3101	17	64746560	a	g	0.1961	-0.09906	0.04105	0.0158151	-0.06072	0.04971	0.221903	-0.001682	37.948	5.75e-09	3.50535e-06	1138430	761839	-+---+	+-+---	10	0.4442	ALL.PP.CURDRINK.COMBINED.locusleads	274.3	ALL.PP.CURDRINK.COMBINED.locusleads;ALL.PP.CURDRINK.MALE.locusleads
rs11777870	8:11148039:A_C	XKR6	known	0	8	11148039	a	c	0.6431	-0.2656	0.06033	1.07034e-05	0.08541	0.06994	0.222014	-0.003616	43.91	2.917e-10	2.06528e-07	954598	684780	+?---+	-?++++	8	0.7786	ALL.SBP.CURDRINK.COMBINED.locusleads	97.22	ALL.DBP.CURDRINK.COMBINED.locusleads;ALL.DBP.HEAVYvsLIGHT.COMBINED.locusleads;ALL.SBP.CURDRINK.COMBINED.locusleads
rs2492321	1:58885774:A_G	LINC01135	known	0	1	58885774	a	g	0.212	-0.1881	0.03192	3.79575e-09	0.07652	0.0627	0.222308	-0.001019	38.99	4.151e-08	2.368e-05	630972	175843	----++-?+-----?++--+--+-++-?-+-++----+-----++-???------+--	-++-+-+?++++++?++---++-----?+-++-++++-+++++--+???-+++-+-+-	102	0.433	EUR.PP.HEAVYvsLIGHT.COMBINED.locusleads	47.8	EUR.PP.HEAVYvsLIGHT.COMBINED.locusleads
rs12441734	15:50769183:C_T	SPPL2A	known	3470	15	50769183	t	c	0.7027	0.09363	0.03467	0.00692133	0.05133	0.04206	0.222313	-0.0012	44.09	2.666e-10	2.15661e-07	1146520	765978	+-++-+	+++-+-	10	0.2836	ALL.PP.CURDRINK.COMBINED.locusleads	429.2	ALL.PP.CURDRINK.COMBINED.locusleads;ALL.PP.CURDRINK.COMBINED.regionleads;ALL.PP.CURDRINK.MALE.locusleads;ALL.PP.CURDRINK.MALE.regionleads;ALL.PP.HEAVYvsLIGHT.COMBINED.locusleads;ALL.PP.HEAVYvsLIGHT.COMBINED.regionleads
rs1962133	6:1679481:A_G	GMDS	known	0	6	1679481	a	g	0.3895	0.1037	0.03094	0.00080332	0.04661	0.03829	0.223494	-0.0009568	55.501	8.875e-13	1.10028e-09	1146960	765040	++++++	++++-+	10	0.9758	ALL.PP.CURDRINK.COMBINED.locusleads	321.1	ALL.PP.CURDRINK.COMBINED.locusleads;ALL.PP.CURDRINK.COMBINED.regionleads;ALL.PP.CURDRINK.FEMALE.locusleads;ALL.PP.CURDRINK.FEMALE.regionleads;ALL.PP.CURDRINK.MALE.locusleads;ALL.PP.CURDRINK.MALE.regionleads;ALL.PP.HEAVYvsLIGHT.COMBINED.locusleads;ALL.PP.HEAVYvsLIGHT.COMBINED.regionleads;ALL.PP.HEAVYvsLIGHT.FEMALE.locusleads;ALL.PP.HEAVYvsLIGHT.FEMALE.regionleads;ALL.SBP.CURDRINK.COMBINED.locuslea…
rs2838320	21:43575156:A_G	HSF2BP	known	0	21	43575156	a	g	0.361	-0.09976	0.02996	0.000869168	-0.04358	0.03588	0.224517	-0.0008966	63.425	1.689e-14	2.93758e-11	1131160	758241	------	-+----	10	0.7846	ALL.DBP.CURDRINK.COMBINED.locusleads	259.1	ALL.DBP.CURDRINK.COMBINED.locusleads;ALL.DBP.CURDRINK.COMBINED.regionleads;ALL.DBP.CURDRINK.MALE.locusleads;ALL.DBP.CURDRINK.MALE.regionleads;ALL.DBP.HEAVYvsLIGHT.COMBINED.locusleads;ALL.DBP.HEAVYvsLIGHT.MALE.locusleads;ALL.DBP.HEAVYvsLIGHT.MALE.regionleads;ALL.SBP.CURDRINK.COMBINED.locusleads;ALL.SBP.CURDRINK.COMBINED.regionleads;ALL.SBP.CURDRINK.FEMALE.locusleads;ALL.SBP.CURDRINK.FEMALE.regionl…
rs35406563	18:50703433:C_G	MAPK4	known	0	18	50703433	c	g	0.4953	0.1189	0.0278	1.89447e-05	-0.04097	0.03379	0.225325	-0.000772	34.607	3.056e-08	1.39323e-05	1144450	764455	-?+++-	+?----	8	0.5429	ALL.DBP.CURDRINK.COMBINED.locusleads	215.4	ALL.DBP.CURDRINK.COMBINED.locusleads
rs34538877	1:41917999:C_T	HIVEP3	known	0	1	41917999	t	c	0.3537	-0.2479	0.05063	9.76547e-07	-0.07314	0.06034	0.225462	-0.002559	118.697	1.68e-26	1.18476e-22	1143880	764581	------	++---+	10	0.776	ALL.SBP.CURDRINK.COMBINED.locusleads	92.1	ALL.DBP.CURDRINK.COMBINED.locusleads;ALL.DBP.CURDRINK.COMBINED.regionleads;ALL.DBP.CURDRINK.MALE.locusleads;ALL.DBP.CURDRINK.MALE.regionleads;ALL.DBP.HEAVYvsLIGHT.COMBINED.locusleads;ALL.DBP.HEAVYvsLIGHT.COMBINED.regionleads;ALL.PP.CURDRINK.COMBINED.locusleads;ALL.PP.CURDRINK.COMBINED.regionleads;ALL.PP.CURDRINK.FEMALE.locusleads;ALL.PP.CURDRINK.FEMALE.regionleads;ALL.PP.CURDRINK.MALE.locusleads;…
rs9806895	16:81523301:C_T	CMIP	known	0	16	81523301	t	c	0.8866	0.1813	0.04149	1.24402e-05	-0.06212	0.05131	0.226018	-0.00172	34.646	2.997e-08	1.36962e-05	1143350	764413	+-++++	-+----	10	0.3002	ALL.DBP.CURDRINK.COMBINED.locusleads	217.5	ALL.DBP.CURDRINK.COMBINED.locusleads
rs6503985	17:48024791:C_T	COPZ2	known	-1375	17	48024791	t	c	0.3524	0.1776	0.04414	5.73246e-05	-0.0606	0.05017	0.227088	-0.001947	40.206	4.78e-08	2.30586e-05	839644	634802	-++--+----+++-+-?+-+--+--++-+--+-++-----++++++-+++++??+--+-++++	+---+--+++---+++?-+-++-++--+-++----++--+--+---++-++-??-++++----	118	0.3705	EUR.PP.CURDRINK.COMBINED.locusleads	41.42	EUR.PP.CURDRINK.COMBINED.locusleads
rs62185095	20:10662617:C_T	JAG1	known	0	20	10662617	t	c	0.0505	0.2259	0.08786	0.0101366	0.1238	0.1025	0.227122	-0.007714	50.159	1.283e-11	1.32986e-08	947357	677593	+??+++	-??+-+	6	0.5537	ALL.PP.CURDRINK.COMBINED.locusleads	20.18	ALL.PP.CURDRINK.COMBINED.locusleads;ALL.PP.HEAVYvsLIGHT.COMBINED.locusleads;EUR.DBP.CURDRINK.COMBINED.locusleads;EUR.PP.CURDRINK.COMBINED.locusleads;EUR.PP.HEAVYvsLIGHT.COMBINED.locusleads
rs6700479	1:10740680:C_T	CASZ1	known	0	1	10740680	t	c	0.1653	0.1875	0.0578	0.00117887	0.08682	0.07197	0.227688	-0.00334	51.381	6.962e-12	6.72318e-09	1139890	760756	++++-+	+++++-	10	0.1005	ALL.SBP.CURDRINK.COMBINED.locusleads	19.3	ALL.DBP.CURDRINK.COMBINED.locusleads;ALL.DBP.CURDRINK.FEMALE.locusleads;ALL.DBP.HEAVYvsLIGHT.COMBINED.locusleads;ALL.DBP.LIGHTvsNEVER.COMBINED.locusleads;ALL.SBP.CURDRINK.COMBINED.locusleads;ALL.SBP.HEAVYvsLIGHT.COMBINED.locusleads;ALL.SBP.LIGHTvsNEVER.COMBINED.locusleads
rs4784640	16:51740399:A_C	LOC101927364	known	-22119	16	51740399	a	c	0.3127	0.1476	0.04842	0.00230119	0.07087	0.05882	0.228256	-0.002344	51.949	5.242e-12	5.17436e-09	1141260	761282	+-++++	-+++++	10	0.7442	ALL.SBP.CURDRINK.COMBINED.locusleads	356.1	ALL.DBP.CURDRINK.COMBINED.locusleads;ALL.DBP.CURDRINK.COMBINED.regionleads;ALL.DBP.HEAVYvsLIGHT.COMBINED.locusleads;ALL.DBP.HEAVYvsLIGHT.COMBINED.regionleads;ALL.SBP.CURDRINK.COMBINED.locusleads;ALL.SBP.CURDRINK.COMBINED.regionleads;ALL.SBP.CURDRINK.MALE.locusleads;ALL.SBP.CURDRINK.MALE.regionleads;ALL.SBP.HEAVYvsLIGHT.COMBINED.locusleads;ALL.SBP.HEAVYvsLIGHT.COMBINED.regionleads;EUR.DBP.CURDRINK…
rs72840788	10:119656173:A_G	BAG3	known	0	10	119656173	a	g	0.179	-0.139	0.04086	0.000669289	-0.05733	0.04761	0.228528	-0.001669	75.849	3.385e-17	9.55712e-14	1049210	731840	-+----	-++-+-	10	0.1578	ALL.DBP.CURDRINK.COMBINED.regionleads	189.1	ALL.DBP.CURDRINK.COMBINED.locusleads;ALL.DBP.CURDRINK.COMBINED.regionleads;ALL.DBP.CURDRINK.MALE.locusleads;ALL.DBP.CURDRINK.MALE.regionleads;ALL.DBP.HEAVYvsLIGHT.COMBINED.locusleads;ALL.DBP.HEAVYvsLIGHT.COMBINED.regionleads;ALL.DBP.HEAVYvsLIGHT.MALE.locusleads;ALL.DBP.HEAVYvsLIGHT.MALE.regionleads;ALL.DBP.HEAVYvsNEVER.COMBINED.locusleads;ALL.DBP.HEAVYvsNEVER.COMBINED.regionleads;EUR.DBP.CURDRINK…
rs4578507	13:97324249:C_T	MBNL2	known	0	13	97324249	t	c	0.6991	0.1357	0.02897	2.81116e-06	-0.04245	0.03526	0.228623	-0.0008389	43.423	3.723e-10	2.79169e-07	1146430	765077	+++++-	+--+-+	10	0.6226	ALL.DBP.CURDRINK.COMBINED.regionleads	483.1	ALL.DBP.CURDRINK.COMBINED.locusleads;ALL.DBP.CURDRINK.COMBINED.regionleads;ALL.DBP.LIGHTvsNEVER.COMBINED.locusleads;ALL.DBP.LIGHTvsNEVER.COMBINED.regionleads
rs10445095	16:80789208:C_G	CDYL2	known	0	16	80789208	c	g	0.1067	-0.2569	0.05855	1.14554e-05	0.08242	0.06853	0.229098	-0.003425	43.06	4.463e-10	3.454e-07	1061460	737512	------	++++++	10	0.9474	ALL.PP.CURDRINK.COMBINED.locusleads	295.2	ALL.PP.CURDRINK.COMBINED.locusleads
rs1464883	7:149469596:A_G	ZNF746	known	-3196	7	149469596	a	g	0.3904	0.0733	0.02895	0.011343	0.04183	0.03479	0.229225	-0.0008374	41.816	8.313e-10	5.74975e-07	1144610	764796	-+++-+	++-+-+	10	0.1	ALL.DBP.CURDRINK.COMBINED.locusleads	510.1	ALL.DBP.CURDRINK.COMBINED.locusleads;ALL.DBP.CURDRINK.COMBINED.regionleads;ALL.DBP.HEAVYvsLIGHT.COMBINED.locusleads;ALL.DBP.HEAVYvsLIGHT.COMBINED.regionleads;ALL.DBP.HEAVYvsLIGHT.FEMALE.locusleads;ALL.DBP.HEAVYvsLIGHT.FEMALE.regionleads;EUR.DBP.CURDRINK.COMBINED.locusleads;EUR.DBP.CURDRINK.COMBINED.regionleads;EUR.DBP.HEAVYvsLIGHT.COMBINED.locusleads;EUR.DBP.HEAVYvsLIGHT.COMBINED.regionleads
rs8034025	15:68763868:C_T	ANP32A	known	-14667	15	68763868	t	c	0.4049	-0.2145	0.05213	3.87661e-05	0.07432	0.0619	0.229888	-0.002716	34.45	3.305e-08	1.46417e-05	1065160	736467	------	++----	10	0.02396	ALL.SBP.CURDRINK.COMBINED.locusleads	714.1	ALL.SBP.CURDRINK.COMBINED.locusleads
rs3079347	3:48006231:C_CCA	MAP4	known	0	3	48006231	cca	c	0.3765	0.1426	0.02544	2.07839e-08	-0.057	0.04751	0.230237	-0.0006466	35.976	1.542e-08	6.51394e-06	652404	189708	-+++-	-----	8	0.06051	ALL.DBP.HEAVYvsLIGHT.COMBINED.locusleads	105.4	ALL.DBP.HEAVYvsLIGHT.COMBINED.locusleads;EUR.DBP.HEAVYvsLIGHT.COMBINED.locusleads
rs6480715	10:74088759:A_G	VCL	known	0	10	74088759	a	g	0.5511	0.152	0.03918	0.000104658	0.05472	0.04565	0.23065	-0.001533	92.045	1.03e-20	3.60026e-17	961400	685545	++-+++	++-+-+	10	0.5514	ALL.PP.CURDRINK.COMBINED.regionleads	137.1	ALL.PP.CURDRINK.COMBINED.locusleads;ALL.PP.CURDRINK.COMBINED.regionleads;ALL.PP.CURDRINK.FEMALE.locusleads;ALL.PP.CURDRINK.FEMALE.regionleads;ALL.PP.CURDRINK.MALE.locusleads;ALL.PP.CURDRINK.MALE.regionleads;ALL.PP.HEAVYvsLIGHT.COMBINED.locusleads;ALL.PP.HEAVYvsLIGHT.COMBINED.regionleads;ALL.PP.HEAVYvsLIGHT.FEMALE.locusleads;ALL.PP.HEAVYvsLIGHT.FEMALE.regionleads;ALL.PP.HEAVYvsLIGHT.MALE.locuslead…
rs4904503	14:89098786:C_T	FOXN3	known	-57385	14	89098786	t	c	0.3175	0.09276	0.03279	0.00467066	0.04844	0.04043	0.23087	-0.001075	43.558	3.48e-10	2.75119e-07	1146780	764935	+-++++	+-++++	10	0.9953	ALL.PP.CURDRINK.COMBINED.regionleads	482.1	ALL.PP.CURDRINK.COMBINED.locusleads;ALL.PP.CURDRINK.COMBINED.regionleads;ALL.PP.HEAVYvsLIGHT.COMBINED.locusleads;ALL.PP.HEAVYvsLIGHT.COMBINED.regionleads;EUR.PP.CURDRINK.COMBINED.locusleads;EUR.PP.CURDRINK.COMBINED.regionleads
rs72722767	8:128192857:A_G	MIR1208	known	42669	8	128192857	a	g	0.3014	-0.1301	0.02318	1.99312e-08	0.05448	0.04549	0.231063	-0.0005368	35.222	2.247e-08	9.03786e-06	750583	208479	----+	+++-+	8	0.04334	ALL.DBP.HEAVYvsLIGHT.COMBINED.regionleads	492.2	ALL.DBP.HEAVYvsLIGHT.COMBINED.locusleads;ALL.DBP.HEAVYvsLIGHT.COMBINED.regionleads;ALL.SBP.HEAVYvsLIGHT.COMBINED.locusleads;ALL.SBP.HEAVYvsLIGHT.COMBINED.regionleads
rs9442595	1:9396454:C_T	SPSB1	known	26923	1	9396454	t	c	0.2791	0.1813	0.04304	2.52716e-05	-0.06248	0.05229	0.232136	-0.001852	33.662	4.901e-08	2.35056e-05	928449	628335	+?+++-	+?---+	8	0.6891	ALL.PP.CURDRINK.COMBINED.locusleads	106.3	ALL.PP.CURDRINK.COMBINED.locusleads
rs746633397	2:25248300:G_GC	DNMT3A	known	0	2	25248300	g	gc	0.0813	0.3861	0.09023	1.8768e-05	-0.1314	0.11	0.232265	-0.00814	34.677	2.951e-08	1.32354e-05	1040210	689993	+?++--	-?--++	8	0.37	ALL.SBP.CURDRINK.COMBINED.locusleads	375.3	ALL.SBP.CURDRINK.COMBINED.locusleads
rs6108599	20:10478305:C_T	SLX4IP	known	0	20	10478305	t	c	0.8979	0.2237	0.04025	2.73253e-08	-0.09731	0.08158	0.232941	-0.001617	34.028	4.082e-08	1.68825e-05	743426	206790	+++-+	----+	8	0.1414	ALL.PP.HEAVYvsLIGHT.COMBINED.locusleads	20.27	ALL.PP.HEAVYvsLIGHT.COMBINED.locusleads
rs57986961	17:46870455:A_G	WNT9B	known	0	17	46870455	a	g	0.3213	-0.1408	0.03287	1.83942e-05	-0.04833	0.04055	0.233315	-0.001079	81.253	2.27e-18	6.09292e-15	1145540	765026	-+----	++---+	10	0.02263	ALL.PP.CURDRINK.COMBINED.locusleads	41.9	ALL.PP.CURDRINK.COMBINED.locusleads;ALL.PP.CURDRINK.MALE.locusleads;ALL.PP.HEAVYvsLIGHT.COMBINED.locusleads;ALL.PP.HEAVYvsLIGHT.MALE.locusleads;ALL.PP.LIGHTvsNEVER.COMBINED.locusleads;ALL.PP.LIGHTvsNEVER.MALE.locusleads;ALL.SBP.CURDRINK.COMBINED.locusleads;ALL.SBP.CURDRINK.MALE.locusleads;ALL.SBP.HEAVYvsLIGHT.COMBINED.locusleads;ALL.SBP.HEAVYvsLIGHT.MALE.locusleads;ALL.SBP.LIGHTvsNEVER.COMBINED.l…
rs73046792	19:49102448:A_G	SNRNP70	known	0	19	49102448	a	g	0.1448	-0.3518	0.08058	1.26631e-05	0.1109	0.09321	0.23413	-0.006488	45.345	1.424e-10	1.08211e-07	955338	679911	-+?---	++?++-	8	0.6334	ALL.SBP.CURDRINK.COMBINED.locusleads	443.1	ALL.PP.CURDRINK.COMBINED.locusleads;ALL.PP.CURDRINK.COMBINED.regionleads;ALL.SBP.CURDRINK.COMBINED.locusleads;ALL.SBP.CURDRINK.COMBINED.regionleads;ALL.SBP.CURDRINK.FEMALE.locusleads;ALL.SBP.CURDRINK.FEMALE.regionleads;EUR.PP.CURDRINK.COMBINED.locusleads;EUR.PP.CURDRINK.COMBINED.regionleads;EUR.SBP.CURDRINK.COMBINED.locusleads;EUR.SBP.CURDRINK.COMBINED.regionleads
rs6927454	6:12550027:C_T	PHACTR1	known	-166777	6	12550027	t	c	0.5105	0.1378	0.02496	3.37396e-08	-0.05774	0.04856	0.234422	-0.000622	34.136	3.867e-08	1.60813e-05	749133	208277	+-+++	-+-+-	8	0.00295	ALL.PP.HEAVYvsLIGHT.COMBINED.locusleads	66.6	ALL.PP.HEAVYvsLIGHT.COMBINED.locusleads
rs3841291	9:93538213:T_TG	FAM120A	known	0	9	93538213	t	tg	0.6487	-0.1512	0.03291	4.34104e-06	0.04894	0.04116	0.234432	-0.001082	38.115	5.289e-09	3.25566e-06	1050730	692755	-?---+	-?+++-	8	0.857	ALL.PP.CURDRINK.COMBINED.locusleads	588.1	ALL.PP.CURDRINK.COMBINED.locusleads;ALL.PP.CURDRINK.COMBINED.regionleads;ALL.PP.CURDRINK.FEMALE.locusleads;ALL.PP.CURDRINK.FEMALE.regionleads;ALL.PP.LIGHTvsNEVER.FEMALE.locusleads;ALL.PP.LIGHTvsNEVER.FEMALE.regionleads
rs768709978	14:35420932:C_CTAAGAGA	NFKBIA	known	16178	14	35420932	ctaagaga	c	0.6303	-0.184	0.03292	2.27977e-08	0.04932	0.04149	0.23455	-0.001083	59.62	1.132e-13	1.61972e-10	1001090	651566	-?----	+?++-+	8	0.611	ALL.PP.CURDRINK.COMBINED.locusleads	214.2	ALL.PP.CURDRINK.COMBINED.locusleads;ALL.PP.CURDRINK.FEMALE.locusleads;ALL.PP.CURDRINK.FEMALE.regionleads;ALL.SBP.CURDRINK.COMBINED.locusleads;EUR.PP.CURDRINK.COMBINED.locusleads
rs34667034	8:51022884:A_G	SNTG1	known	228766	8	51022884	a	g	0.189	0.204	0.054	0.000158234	0.08007	0.06736	0.234563	-0.002914	63.862	1.357e-14	2.10328e-11	1146310	765025	+++++-	+--+-+	10	0.2626	ALL.SBP.CURDRINK.COMBINED.regionleads	256.1	ALL.DBP.CURDRINK.COMBINED.locusleads;ALL.DBP.CURDRINK.COMBINED.regionleads;ALL.DBP.HEAVYvsNEVER.COMBINED.locusleads;ALL.DBP.HEAVYvsNEVER.COMBINED.regionleads;ALL.DBP.LIGHTvsNEVER.COMBINED.locusleads;ALL.DBP.LIGHTvsNEVER.COMBINED.regionleads;ALL.PP.CURDRINK.COMBINED.locusleads;ALL.PP.CURDRINK.COMBINED.regionleads;ALL.PP.HEAVYvsLIGHT.COMBINED.locusleads;ALL.PP.HEAVYvsLIGHT.COMBINED.regionleads;ALL.…
rs36099535	3:14854680:A_G	FGD5	known	0	3	14854680	a	g	0.6772	0.2576	0.05257	9.57717e-07	-0.07407	0.06239	0.235145	-0.002761	53.597	2.299e-12	2.43915e-09	1145720	765788	++++++	--+-+-	10	0.4233	ALL.SBP.CURDRINK.COMBINED.locusleads	140.2	ALL.SBP.CURDRINK.COMBINED.locusleads
rs9747682	17:1443113:A_G	CRK	known	0	17	1443113	a	g	0.2946	-0.1583	0.03335	2.06837e-06	-0.04872	0.04106	0.235403	-0.001111	96.905	9.063e-22	3.44868e-18	1135620	761833	------	----++	10	0.9223	ALL.PP.CURDRINK.COMBINED.regionleads	127.1	ALL.DBP.CURDRINK.COMBINED.locusleads;ALL.DBP.CURDRINK.COMBINED.regionleads;ALL.PP.CURDRINK.COMBINED.locusleads;ALL.PP.CURDRINK.COMBINED.regionleads;ALL.PP.CURDRINK.FEMALE.locusleads;ALL.PP.CURDRINK.FEMALE.regionleads;ALL.PP.CURDRINK.MALE.locusleads;ALL.PP.CURDRINK.MALE.regionleads;ALL.PP.HEAVYvsLIGHT.COMBINED.locusleads;ALL.PP.HEAVYvsLIGHT.COMBINED.regionleads;ALL.PP.HEAVYvsLIGHT.FEMALE.locuslead…
rs35783704	8:104954030:A_G	ZFPM2	known	-364888	8	104954030	a	g	0.0885	-0.5046	0.09357	6.93859e-08	0.1286	0.1084	0.235485	-0.008749	76.076	3.023e-17	6.97109e-14	1041630	728091	------	-+++++	10	0.8788	ALL.SBP.CURDRINK.COMBINED.regionleads	188.1	ALL.DBP.CURDRINK.COMBINED.locusleads;ALL.DBP.CURDRINK.COMBINED.regionleads;ALL.DBP.CURDRINK.FEMALE.locusleads;ALL.DBP.CURDRINK.FEMALE.regionleads;ALL.DBP.HEAVYvsLIGHT.COMBINED.locusleads;ALL.DBP.HEAVYvsLIGHT.COMBINED.regionleads;ALL.PP.CURDRINK.COMBINED.locusleads;ALL.PP.CURDRINK.COMBINED.regionleads;ALL.SBP.CURDRINK.COMBINED.locusleads;ALL.SBP.CURDRINK.COMBINED.regionleads;ALL.SBP.CURDRINK.FEMAL…
rs4842680	12:89722585:A_G	LINC00936	known	10633	12	89722585	a	g	0.5291	-0.2747	0.04508	1.10391e-09	0.06531	0.0551	0.235899	-0.00203	80.495	3.318e-18	8.57561e-15	1148260	766115	------	++---+	10	8.683e-11	ALL.SBP.CURDRINK.COMBINED.locusleads	3.4	ALL.DBP.CURDRINK.COMBINED.locusleads;ALL.DBP.CURDRINK.MALE.locusleads;ALL.DBP.HEAVYvsNEVER.COMBINED.locusleads;ALL.PP.HEAVYvsNEVER.COMBINED.locusleads;ALL.PP.LIGHTvsNEVER.COMBINED.locusleads;ALL.SBP.CURDRINK.COMBINED.locusleads;ALL.SBP.CURDRINK.FEMALE.locusleads;ALL.SBP.CURDRINK.MALE.locusleads;ALL.SBP.HEAVYvsNEVER.COMBINED.locusleads;ALL.SBP.LIGHTvsNEVER.COMBINED.locusleads;ALL.SBP.LIGHTvsNEVER.…
rs185097551	12:89584836:A_C	ATP2B1	known	-3212	12	89584836	a	c	0.9613	0.5724	0.1	1.04045e-08	0.1792	0.1513	0.236254	-0.009993	76.439	2.521e-17	5.87062e-14	963837	637430	+?+++-	+?++-+	8	0.2233	ALL.SBP.CURDRINK.COMBINED.locusleads	3.5	ALL.DBP.CURDRINK.COMBINED.locusleads;ALL.DBP.CURDRINK.FEMALE.locusleads;ALL.DBP.HEAVYvsNEVER.COMBINED.locusleads;ALL.DBP.LIGHTvsNEVER.FEMALE.locusleads;ALL.SBP.CURDRINK.COMBINED.locusleads;ALL.SBP.CURDRINK.FEMALE.locusleads;ALL.SBP.HEAVYvsLIGHT.COMBINED.locusleads;ALL.SBP.HEAVYvsNEVER.COMBINED.locusleads;ALL.SBP.LIGHTvsNEVER.COMBINED.locusleads;ALL.SBP.LIGHTvsNEVER.FEMALE.locusleads;EAS.DBP.CURDR…
rs28575479	8:26525323:C_T	DPYSL2	known	0	8	26525323	t	c	0.1859	0.2028	0.07523	0.00702339	0.1134	0.09578	0.236428	-0.005656	35.633	1.83e-08	2.01134e-05	492807	313877	+-+++-	++++-+	10	0.6275	ALL.SBP.CURDRINK.FEMALE.locusleads	205.7	ALL.SBP.CURDRINK.FEMALE.locusleads
rs2393926	6:27352965:C_G	ZNF204P	known	-4857	6	27352965	c	g	0.5423	0.1112	0.03093	0.000324124	0.04398	0.03723	0.237481	-0.0009315	61.278	4.94e-14	7.53823e-11	1148320	766149	+-+++-	---+++	10	0.1507	ALL.PP.CURDRINK.COMBINED.locusleads	39.9	ALL.PP.CURDRINK.COMBINED.locusleads;ALL.PP.CURDRINK.FEMALE.locusleads;ALL.PP.CURDRINK.MALE.locusleads;ALL.PP.HEAVYvsLIGHT.COMBINED.locusleads;ALL.PP.HEAVYvsNEVER.COMBINED.locusleads;ALL.SBP.CURDRINK.COMBINED.locusleads;ALL.SBP.CURDRINK.COMBINED.regionleads;EUR.PP.HEAVYvsLIGHT.COMBINED.locusleads
rs78714175	11:130422888:A_C	ADAMTS8	known	0	11	130422888	a	c	0.9397	-0.3357	0.07811	1.72513e-05	0.1089	0.0922	0.237552	-0.006094	39.747	2.34e-09	1.56848e-06	956234	679981	-+?---	+-?+++	8	0.5424	ALL.PP.CURDRINK.COMBINED.locusleads	4.11	ALL.PP.CURDRINK.COMBINED.locusleads
rs61884689	11:30432354:G_T	MPPED2	known	0	11	30432354	t	g	0.1367	0.1228	0.05372	0.0222585	0.0738	0.06257	0.238208	-0.002884	42.644	5.494e-10	4.17708e-07	1059960	737299	-+-++-	-+++-+	10	0.04795	ALL.PP.CURDRINK.COMBINED.locusleads	247.3	ALL.PP.CURDRINK.COMBINED.locusleads;ALL.PP.HEAVYvsLIGHT.COMBINED.locusleads
rs35680304	7:131288736:C_T	MKLN1	known	0	7	131288736	t	c	0.5512	0.1112	0.03145	0.000406587	0.04533	0.03844	0.238302	-0.0009858	61.766	3.869e-14	6.01703e-11	1145690	764810	++++++	-+++-+	10	0.8089	ALL.PP.CURDRINK.COMBINED.locusleads	269.1	ALL.PP.CURDRINK.COMBINED.locusleads;ALL.PP.CURDRINK.COMBINED.regionleads;ALL.PP.CURDRINK.MALE.locusleads;ALL.PP.CURDRINK.MALE.regionleads;ALL.PP.HEAVYvsLIGHT.COMBINED.locusleads;ALL.PP.HEAVYvsLIGHT.COMBINED.regionleads;ALL.PP.HEAVYvsLIGHT.MALE.locusleads;ALL.PP.HEAVYvsLIGHT.MALE.regionleads;ALL.PP.LIGHTvsNEVER.COMBINED.locusleads;ALL.PP.LIGHTvsNEVER.COMBINED.regionleads;ALL.SBP.CURDRINK.COMBINED.…
rs34000391	3:168986896:C_T	LOC100507661	known	64903	3	168986896	t	c	0.6924	0.1835	0.04966	0.000219777	0.07277	0.06178	0.238841	-0.00246	61.729	3.942e-14	5.67925e-11	1148390	766185	-+++++	++-+--	10	0.3661	ALL.SBP.CURDRINK.COMBINED.locusleads	61.7	ALL.DBP.CURDRINK.COMBINED.locusleads;ALL.DBP.HEAVYvsLIGHT.COMBINED.locusleads;ALL.SBP.CURDRINK.COMBINED.locusleads;ALL.SBP.CURDRINK.FEMALE.locusleads;ALL.SBP.HEAVYvsLIGHT.COMBINED.locusleads
rs12572072	10:32019043:C_T	KIF5B	known	0	10	32019043	t	c	0.7338	0.1747	0.03315	1.36435e-07	-0.04861	0.04127	0.238855	-0.001099	54.041	1.842e-12	2.17423e-09	1148410	766187	+++++-	--+--+	10	0.0618	ALL.PP.CURDRINK.COMBINED.locusleads	336.1	ALL.PP.CURDRINK.COMBINED.locusleads;ALL.PP.CURDRINK.COMBINED.regionleads;ALL.PP.CURDRINK.MALE.locusleads;ALL.PP.CURDRINK.MALE.regionleads;ALL.PP.HEAVYvsLIGHT.COMBINED.locusleads;ALL.PP.HEAVYvsLIGHT.COMBINED.regionleads;ALL.PP.LIGHTvsNEVER.COMBINED.locusleads;ALL.PP.LIGHTvsNEVER.COMBINED.regionleads;ALL.SBP.CURDRINK.COMBINED.locusleads;ALL.SBP.CURDRINK.COMBINED.regionleads;ALL.SBP.CURDRINK.MALE.lo…
rs6673108	1:42076649:C_T	HIVEP3	known	40724	1	42076649	t	c	0.5693	0.1504	0.0442	0.000667199	0.06379	0.05423	0.239481	-0.001951	57.714	2.935e-13	3.65945e-10	1147270	765172	++++++	-++++-	10	0.4595	ALL.SBP.CURDRINK.COMBINED.locusleads	92.2	ALL.PP.CURDRINK.COMBINED.locusleads;ALL.PP.CURDRINK.MALE.locusleads;ALL.PP.HEAVYvsLIGHT.COMBINED.locusleads;ALL.SBP.CURDRINK.COMBINED.locusleads;ALL.SBP.CURDRINK.MALE.locusleads;ALL.SBP.HEAVYvsLIGHT.COMBINED.locusleads
rs6095255	20:48720511:A_G	PREX1	known	0	20	48720511	a	g	0.3258	0.1403	0.02543	3.44628e-08	0.05896	0.05014	0.239632	-0.0006455	51.612	6.202e-12	6.20697e-09	633684	173333	--+++	-+++-	8	0.5782	ALL.DBP.HEAVYvsLIGHT.COMBINED.locusleads	187.3	ALL.DBP.CURDRINK.COMBINED.locusleads;ALL.DBP.HEAVYvsLIGHT.COMBINED.locusleads
rs904366	15:67019534:G_T	SMAD3	known	-46322	15	67019534	t	g	0.5603	0.1044	0.04498	0.0202851	0.06345	0.05397	0.239734	-0.002022	36.957	9.437e-09	1.22046e-05	626525	453203	+++--	-++++	8	0.622	ALL.PP.LIGHTvsNEVER.COMBINED.regionleads	232.5	ALL.PP.LIGHTvsNEVER.COMBINED.locusleads;ALL.PP.LIGHTvsNEVER.COMBINED.regionleads
rs13395810	2:176671396:C_G	LOC102724224	known	15438	2	176671396	c	g	0.5881	0.3062	0.06951	1.05725e-05	-0.09828	0.08367	0.240149	-0.004821	38.981	3.431e-09	4.63505e-06	492978	313987	+-++++	-+--+-	10	0.6765	ALL.SBP.CURDRINK.FEMALE.regionleads	312.2	ALL.DBP.CURDRINK.COMBINED.locusleads;ALL.DBP.CURDRINK.COMBINED.regionleads;ALL.DBP.CURDRINK.FEMALE.locusleads;ALL.DBP.CURDRINK.FEMALE.regionleads;ALL.SBP.CURDRINK.FEMALE.locusleads;ALL.SBP.CURDRINK.FEMALE.regionleads
rs11248862	16:1294290:A_G	UBE2I	known	-14862	16	1294290	a	g	0.1191	0.1553	0.0632	0.0139994	0.08549	0.07283	0.240463	-0.003992	50.132	1.3e-11	1.34617e-08	947469	680938	+-?+++	--?+--	8	0.113	ALL.PP.CURDRINK.COMBINED.regionleads	378.1	ALL.PP.CURDRINK.COMBINED.locusleads;ALL.PP.CURDRINK.COMBINED.regionleads;ALL.PP.HEAVYvsLIGHT.COMBINED.locusleads;ALL.PP.HEAVYvsLIGHT.COMBINED.regionleads;EUR.PP.CURDRINK.COMBINED.locusleads;EUR.PP.CURDRINK.COMBINED.regionleads;EUR.PP.HEAVYvsLIGHT.COMBINED.locusleads;EUR.PP.HEAVYvsLIGHT.COMBINED.regionleads
rs11067763	12:115760536:A_G	MED13L	known	-198039	12	115760536	a	g	0.8499	0.2708	0.03466	5.58244e-15	-0.0524	0.04472	0.241303	-0.001199	120.329	7.428e-27	5.29386e-23	1147380	765921	++++++	---+-+	10	0.008915	ALL.DBP.CURDRINK.COMBINED.locusleads	28.2	ALL.DBP.CURDRINK.COMBINED.locusleads;ALL.DBP.CURDRINK.FEMALE.locusleads;ALL.DBP.CURDRINK.FEMALE.regionleads;ALL.DBP.CURDRINK.MALE.locusleads;ALL.DBP.HEAVYvsLIGHT.COMBINED.locusleads;ALL.DBP.HEAVYvsLIGHT.MALE.locusleads;ALL.DBP.HEAVYvsNEVER.COMBINED.locusleads;ALL.DBP.HEAVYvsNEVER.COMBINED.regionleads;ALL.DBP.HEAVYvsNEVER.FEMALE.locusleads;ALL.DBP.HEAVYvsNEVER.FEMALE.regionleads;ALL.DBP.LIGHTvsNEV…
rs4470758	5:115039644:A_G	TRIM36	known	-85117	5	115039644	a	g	0.2107	-0.2331	0.05398	1.5726e-05	0.07718	0.06619	0.243599	-0.002912	35.147	2.333e-08	1.07399e-05	1145600	764755	-+---+	-++-+-	10	0.2066	ALL.SBP.CURDRINK.COMBINED.locusleads	132.3	ALL.SBP.CURDRINK.COMBINED.locusleads
rs10559495	10:62964300:T_TA	EGR2	known	145133	10	62964300	t	ta	0.6904	-0.1498	0.02715	3.43865e-08	-0.05759	0.04943	0.243986	-0.0007365	55.612	8.397e-13	1.01919e-09	643169	195014	-----	----+	8	0.9219	ALL.DBP.HEAVYvsLIGHT.COMBINED.locusleads	134.3	ALL.DBP.CURDRINK.COMBINED.locusleads;ALL.DBP.CURDRINK.FEMALE.locusleads;ALL.DBP.HEAVYvsLIGHT.COMBINED.locusleads;ALL.DBP.LIGHTvsNEVER.COMBINED.locusleads;ALL.SBP.CURDRINK.COMBINED.locusleads;ALL.SBP.HEAVYvsLIGHT.COMBINED.locusleads
rs714417	11:45225625:C_T	PRDM11	known	0	11	45225625	t	c	0.4038	-0.1359	0.03293	3.67629e-05	-0.04708	0.04041	0.243995	-0.001083	77.586	1.42e-17	3.49036e-14	1148380	766182	------	-+--++	10	0.233	ALL.PP.CURDRINK.COMBINED.regionleads	183.1	ALL.PP.CURDRINK.COMBINED.locusleads;ALL.PP.CURDRINK.COMBINED.regionleads;ALL.PP.CURDRINK.FEMALE.locusleads;ALL.PP.CURDRINK.FEMALE.regionleads;ALL.PP.CURDRINK.MALE.locusleads;ALL.PP.CURDRINK.MALE.regionleads;ALL.PP.HEAVYvsLIGHT.COMBINED.locusleads;ALL.PP.HEAVYvsLIGHT.COMBINED.regionleads;ALL.PP.HEAVYvsLIGHT.FEMALE.locusleads;ALL.PP.HEAVYvsLIGHT.FEMALE.regionleads;ALL.PP.HEAVYvsLIGHT.MALE.locuslead…
rs2891698	19:18677171:A_G	CRTC1	known	-6443	19	18677171	a	g	0.5794	-0.1309	0.02727	1.58549e-06	0.03861	0.03317	0.244423	-0.0007428	46.74	7.087e-11	6.13914e-08	1145810	764827	------	-++-++	10	0.1412	ALL.DBP.CURDRINK.COMBINED.locusleads	148.3	ALL.DBP.CURDRINK.COMBINED.locusleads;ALL.DBP.CURDRINK.FEMALE.locusleads;EAS.DBP.CURDRINK.COMBINED.locusleads;EAS.DBP.CURDRINK.COMBINED.regionleads;EAS.DBP.CURDRINK.FEMALE.locusleads;EAS.DBP.CURDRINK.FEMALE.regionleads;EAS.DBP.LIGHTvsNEVER.FEMALE.locusleads;EAS.DBP.LIGHTvsNEVER.FEMALE.regionleads;EAS.SBP.CURDRINK.FEMALE.locusleads;EAS.SBP.CURDRINK.FEMALE.regionleads;EAS.SBP.LIGHTvsNEVER.FEMALE.loc…
rs144244914	9:109998124:T_TTG	PALM2-AKAP2	known	0	9	109998124	t	ttg	0.1831	-0.1095	0.03583	0.00224238	-0.05138	0.04433	0.246442	-0.001282	47.048	6.077e-11	5.33144e-08	1048030	691640	-?--++	+?-+--	8	0.09345	ALL.DBP.CURDRINK.COMBINED.regionleads	278.3	ALL.DBP.CURDRINK.COMBINED.locusleads;ALL.DBP.CURDRINK.COMBINED.regionleads;ALL.DBP.HEAVYvsLIGHT.COMBINED.locusleads;ALL.DBP.HEAVYvsLIGHT.COMBINED.regionleads;EUR.DBP.CURDRINK.COMBINED.locusleads;EUR.DBP.CURDRINK.COMBINED.regionleads
rs2138741	4:155534390:G_T	GUCY1A3	known	-132319	4	155534390	t	g	0.7655	0.3812	0.06117	4.61068e-10	-0.1095	0.09454	0.246766	-0.003739	52.987	2.276e-11	2.18321e-07	177130	76414	++--++++-+-++	+---------+-+	24	0.1861	EAS.DBP.CURDRINK.COMBINED.regionleads	77.7	ALL.DBP.CURDRINK.COMBINED.locusleads;ALL.DBP.LIGHTvsNEVER.COMBINED.locusleads;EAS.DBP.CURDRINK.COMBINED.locusleads;EAS.DBP.CURDRINK.COMBINED.regionleads;EAS.DBP.LIGHTvsNEVER.COMBINED.locusleads;EAS.DBP.LIGHTvsNEVER.COMBINED.regionleads
rs294906	6:159249271:A_G	FNDC1	known	0	6	159249271	a	g	0.5898	-0.122	0.03291	0.000209663	-0.04662	0.04035	0.247931	-0.001081	65.342	6.473e-15	1.12766e-11	1147610	766110	------	+-+---	10	0.00103	ALL.PP.CURDRINK.COMBINED.locusleads	87.2	ALL.PP.CURDRINK.COMBINED.locusleads;ALL.PP.CURDRINK.MALE.locusleads;ALL.PP.HEAVYvsLIGHT.COMBINED.locusleads;ALL.PP.HEAVYvsLIGHT.MALE.locusleads;ALL.PP.HEAVYvsNEVER.COMBINED.locusleads;ALL.PP.LIGHTvsNEVER.COMBINED.locusleads;ALL.PP.LIGHTvsNEVER.MALE.locusleads;EUR.PP.HEAVYvsLIGHT.COMBINED.locusleads
rs6748821	2:629601:A_G	TMEM18	known	-38371	2	629601	a	g	0.1559	-0.2264	0.06342	0.000357183	-0.08814	0.07635	0.248328	-0.004021	67.365	2.355e-15	4.12234e-12	1144220	765614	------	-++--+	10	0.1168	ALL.SBP.CURDRINK.COMBINED.locusleads	233.1	ALL.DBP.CURDRINK.COMBINED.locusleads;ALL.DBP.CURDRINK.FEMALE.locusleads;ALL.DBP.CURDRINK.FEMALE.regionleads;ALL.DBP.HEAVYvsLIGHT.COMBINED.locusleads;ALL.DBP.LIGHTvsNEVER.COMBINED.locusleads;ALL.PP.CURDRINK.COMBINED.locusleads;ALL.PP.CURDRINK.COMBINED.regionleads;ALL.PP.HEAVYvsLIGHT.COMBINED.locusleads;ALL.PP.HEAVYvsLIGHT.COMBINED.regionleads;ALL.SBP.CURDRINK.COMBINED.locusleads;ALL.SBP.CURDRINK.C…
rs78206509	17:44857687:A_G	EFTUD2	known	0	17	44857687	a	g	0.0765	0.1521	0.0632	0.0160998	0.08673	0.07517	0.248588	-0.003992	40.15	1.912e-09	1.30652e-06	1132500	760535	---++-	+++-++	10	0.0188	ALL.PP.CURDRINK.COMBINED.locusleads	41.32	ALL.PP.CURDRINK.COMBINED.locusleads;ALL.PP.CURDRINK.MALE.locusleads
rs116936375	10:18448206:A_G	CACNB2	known	0	10	18448206	a	g	0.0379	-0.2046	0.09006	0.0230975	-0.1198	0.104	0.249353	-0.008108	43.961	2.844e-10	2.18398e-07	908061	662654	-??-+-	+??---	6	0.05598	ALL.DBP.CURDRINK.COMBINED.locusleads	34.11	ALL.DBP.CURDRINK.COMBINED.locusleads;ALL.DBP.HEAVYvsLIGHT.COMBINED.locusleads;ALL.SBP.CURDRINK.COMBINED.locusleads;ALL.SBP.HEAVYvsLIGHT.COMBINED.locusleads;EUR.DBP.CURDRINK.COMBINED.locusleads
rs34032327	19:2158084:C_G	DOT1L	known	-6064	19	2158084	c	g	0.6479	0.1757	0.03369	1.83622e-07	-0.0469	0.04073	0.249533	-0.001133	58.612	1.873e-13	2.58784e-10	1137320	761068	+-++++	+++---	10	0.1391	ALL.PP.CURDRINK.COMBINED.locusleads	16.4	ALL.DBP.CURDRINK.MALE.locusleads;ALL.DBP.CURDRINK.MALE.regionleads;ALL.PP.CURDRINK.COMBINED.locusleads;ALL.PP.CURDRINK.FEMALE.locusleads;ALL.PP.HEAVYvsLIGHT.COMBINED.locusleads;ALL.PP.HEAVYvsNEVER.COMBINED.locusleads;ALL.PP.LIGHTvsNEVER.COMBINED.locusleads;ALL.SBP.CURDRINK.COMBINED.locusleads;ALL.SBP.CURDRINK.MALE.locusleads;EAS.PP.CURDRINK.COMBINED.locusleads;EAS.PP.LIGHTvsNEVER.COMBINED.locusle…
NA	6:135813807:A_AT	PDE7B	novel-T3	-37888	6	135813807	a	at	0.3621	0.2394	0.04262	1.9421e-08	-0.09283	0.08064	0.249664	-0.001812	36.09	1.456e-08	6.30484e-06	652412	189711	+++++	-----	8	0.9416	ALL.SBP.HEAVYvsLIGHT.COMBINED.regionleads	645.1	ALL.SBP.HEAVYvsLIGHT.COMBINED.locusleads;ALL.SBP.HEAVYvsLIGHT.COMBINED.regionleads
rs407364	5:123801665:C_T	CSNK1G3	known	184621	5	123801665	t	c	0.4901	0.06374	0.02722	0.0191982	0.03808	0.03313	0.250386	-0.0007405	34.482	3.253e-08	1.47079e-05	1147220	765146	++-+++	--++-+	10	0.9024	ALL.DBP.CURDRINK.COMBINED.locusleads	98.13	ALL.DBP.CURDRINK.COMBINED.locusleads
rs1232589	20:10916913:G_T	LOC101929413	known	7641	20	10916913	t	g	0.4695	-0.1264	0.02789	5.84029e-06	-0.03883	0.03379	0.250491	-0.0007769	94.972	2.382e-21	1.07626e-17	1148360	766163	-----+	-+--+-	10	0.7946	ALL.DBP.CURDRINK.COMBINED.locusleads	20.9	ALL.DBP.CURDRINK.COMBINED.locusleads;ALL.DBP.CURDRINK.FEMALE.locusleads;ALL.DBP.CURDRINK.MALE.locusleads;ALL.DBP.HEAVYvsLIGHT.COMBINED.locusleads;ALL.DBP.HEAVYvsLIGHT.MALE.locusleads;ALL.DBP.LIGHTvsNEVER.COMBINED.locusleads
rs12329202	2:42845036:A_C	HAAO	known	52425	2	42845036	a	c	0.6467	0.208	0.03691	1.74724e-08	-0.08481	0.07381	0.250543	-0.001361	35.467	1.988e-08	8.30896e-06	747389	207706	+-+++	-+-+-	8	0.2636	ALL.SBP.HEAVYvsLIGHT.COMBINED.locusleads	135.11	ALL.SBP.HEAVYvsLIGHT.COMBINED.locusleads
rs769697	12:89309371:A_G	DUSP6	known	-38453	12	89309371	a	g	0.2936	-0.255	0.05544	4.2337e-06	-0.125	0.1088	0.250598	-0.003072	37.6	4.437e-08	6.37506e-05	357470	103444	---+++-+-++--------++-+-+-+++-------+++-+-+-++---	+++--++-+-++-++++++------+---+----+----+-+++---+-	96	0.7163	EUR.SBP.HEAVYvsLIGHT.MALE.locusleads	3.17	EUR.SBP.HEAVYvsLIGHT.MALE.locusleads
rs73033340	7:1156056:A_G	ZFAND2A	known	0	7	1156056	a	g	0.9651	0.4436	0.1001	9.35501e-06	-0.131	0.1141	0.250921	-0.01002	52.042	5.002e-12	5.47324e-09	873469	643714	+??+-+	-??-+-	6	0.2974	ALL.DBP.CURDRINK.COMBINED.locusleads	355.1	ALL.DBP.CURDRINK.COMBINED.locusleads;ALL.DBP.CURDRINK.COMBINED.regionleads;ALL.DBP.HEAVYvsLIGHT.COMBINED.locusleads;ALL.DBP.HEAVYvsLIGHT.COMBINED.regionleads;ALL.SBP.CURDRINK.COMBINED.locusleads;ALL.SBP.HEAVYvsLIGHT.COMBINED.locusleads;ALL.SBP.HEAVYvsLIGHT.COMBINED.regionleads;EUR.DBP.CURDRINK.COMBINED.locusleads;EUR.DBP.CURDRINK.COMBINED.regionleads;EUR.DBP.HEAVYvsLIGHT.COMBINED.locusleads;EUR.D…
rs830458	8:76057527:C_T	LINC01111	known	-349126	8	76057527	t	c	0.4438	-0.314	0.04434	1.42456e-12	0.06251	0.05449	0.251306	-0.001965	112.93	3.003e-25	1.82609e-21	1147220	765146	-+----	+--+++	10	0.01718	ALL.SBP.CURDRINK.COMBINED.locusleads	68.2	ALL.DBP.CURDRINK.COMBINED.locusleads;ALL.DBP.CURDRINK.COMBINED.regionleads;ALL.DBP.CURDRINK.FEMALE.locusleads;ALL.DBP.CURDRINK.FEMALE.regionleads;ALL.DBP.CURDRINK.MALE.locusleads;ALL.DBP.CURDRINK.MALE.regionleads;ALL.DBP.HEAVYvsLIGHT.COMBINED.locusleads;ALL.DBP.HEAVYvsLIGHT.COMBINED.regionleads;ALL.DBP.LIGHTvsNEVER.COMBINED.locusleads;ALL.DBP.LIGHTvsNEVER.COMBINED.regionleads;ALL.DBP.LIGHTvsNEVER…
rs10265221	7:151717243:C_T	PRKAG2	known	0	7	151717243	t	c	0.7628	-0.3618	0.05722	2.56593e-10	0.07774	0.0679	0.252243	-0.003271	99.899	2.029e-22	8.58767e-19	1138170	763472	+-----	-++++-	10	0.439	ALL.SBP.CURDRINK.COMBINED.regionleads	123.1	ALL.DBP.CURDRINK.COMBINED.locusleads;ALL.DBP.CURDRINK.COMBINED.regionleads;ALL.DBP.CURDRINK.FEMALE.locusleads;ALL.DBP.CURDRINK.FEMALE.regionleads;ALL.DBP.CURDRINK.MALE.locusleads;ALL.DBP.CURDRINK.MALE.regionleads;ALL.DBP.HEAVYvsLIGHT.COMBINED.locusleads;ALL.DBP.HEAVYvsLIGHT.COMBINED.regionleads;ALL.DBP.HEAVYvsLIGHT.FEMALE.locusleads;ALL.DBP.HEAVYvsLIGHT.FEMALE.regionleads;ALL.DBP.HEAVYvsLIGHT.MAL…
rs34585419	8:33486501:A_G	MAK16	known	0	8	33486501	a	g	0.441	0.1462	0.03011	1.20065e-06	-0.04242	0.03714	0.253386	-0.0009056	46.141	9.562e-11	8.44815e-08	1147170	765127	++++++	-+--++	10	0.7877	ALL.PP.CURDRINK.COMBINED.locusleads	431.1	ALL.PP.CURDRINK.COMBINED.locusleads;ALL.PP.CURDRINK.COMBINED.regionleads;EUR.PP.CURDRINK.COMBINED.locusleads;EUR.PP.CURDRINK.COMBINED.regionleads
rs17474664	7:90840014:A_G	CDK14	known	0	7	90840014	a	g	0.8993	-0.2851	0.06514	1.20475e-05	0.0858	0.0752	0.253888	-0.004242	47.19	5.661e-11	5.19583e-08	960875	683924	-+?---	+-?+++	8	0.5436	ALL.PP.CURDRINK.COMBINED.locusleads	417.2	ALL.PP.CURDRINK.COMBINED.locusleads;ALL.PP.CURDRINK.COMBINED.regionleads;ALL.PP.CURDRINK.MALE.locusleads;ALL.PP.CURDRINK.MALE.regionleads;ALL.PP.HEAVYvsLIGHT.COMBINED.locusleads;EUR.PP.CURDRINK.COMBINED.locusleads;EUR.PP.CURDRINK.COMBINED.regionleads;EUR.PP.CURDRINK.MALE.locusleads;EUR.PP.CURDRINK.MALE.regionleads
rs73251492	20:10987390:A_G	LOC101929413	known	78118	20	10987390	a	g	0.075	0.1378	0.05205	0.00811003	0.07128	0.06252	0.254238	-0.002708	43.416	3.736e-10	2.80061e-07	1139930	764699	+++++-	++++-+	10	0.9925	ALL.DBP.CURDRINK.COMBINED.locusleads	20.22	ALL.DBP.CURDRINK.COMBINED.locusleads;ALL.DBP.HEAVYvsLIGHT.COMBINED.locusleads
rs12271873	11:45126022:G_T	PRDM11	known	0	11	45126022	t	g	0.8882	0.2024	0.04473	6.04163e-06	0.09739	0.08547	0.25451	-0.001998	37.364	7.701e-09	3.83804e-06	614873	175360	+?+++	+?+--	6	0.2382	ALL.PP.HEAVYvsLIGHT.COMBINED.locusleads	183.2	ALL.PP.CURDRINK.COMBINED.locusleads;ALL.PP.HEAVYvsLIGHT.COMBINED.locusleads
rs11172113	12:57133500:C_T	LRP1	known	0	12	57133500	t	c	0.6199	-0.0944	0.03207	0.0032446	-0.04438	0.03903	0.255507	-0.001027	47.373	5.165e-11	4.77213e-08	1145870	764355	-+---+	----+-	10	0.4171	ALL.PP.CURDRINK.COMBINED.regionleads	160.2	ALL.PP.CURDRINK.COMBINED.locusleads;ALL.PP.CURDRINK.COMBINED.regionleads;ALL.PP.CURDRINK.MALE.locusleads;ALL.PP.CURDRINK.MALE.regionleads;ALL.PP.HEAVYvsLIGHT.COMBINED.locusleads;ALL.PP.HEAVYvsLIGHT.COMBINED.regionleads;ALL.PP.LIGHTvsNEVER.COMBINED.locusleads;ALL.PP.LIGHTvsNEVER.COMBINED.regionleads;EUR.PP.CURDRINK.COMBINED.locusleads;EUR.PP.CURDRINK.COMBINED.regionleads
rs195485	6:115910935:C_T	FRK	known	-30594	6	115910935	t	c	0.3477	-0.1144	0.02252	3.77576e-07	-0.05014	0.04412	0.25577	-0.0005054	44.478	2.197e-10	1.54649e-07	750578	208478	+----	+----	8	0.02872	ALL.DBP.HEAVYvsLIGHT.COMBINED.locusleads	462.1	ALL.DBP.CURDRINK.COMBINED.locusleads;ALL.DBP.CURDRINK.COMBINED.regionleads;ALL.DBP.CURDRINK.MALE.locusleads;ALL.DBP.CURDRINK.MALE.regionleads;ALL.DBP.HEAVYvsLIGHT.COMBINED.locusleads;ALL.DBP.HEAVYvsLIGHT.COMBINED.regionleads;ALL.DBP.HEAVYvsLIGHT.MALE.locusleads;ALL.DBP.HEAVYvsLIGHT.MALE.regionleads;EUR.DBP.CURDRINK.COMBINED.locusleads;EUR.DBP.CURDRINK.COMBINED.regionleads;EUR.DBP.HEAVYvsLIGHT.COM…
rs6788554	3:37415957:C_T	C3orf35	known	0	3	37415957	t	c	0.6667	0.1955	0.03538	3.28136e-08	-0.04796	0.04223	0.256088	-0.001251	71.266	3.349e-16	6.82667e-13	1143180	765471	++++++	+++---	10	0.5757	ALL.PP.CURDRINK.COMBINED.locusleads	210.1	ALL.PP.CURDRINK.COMBINED.locusleads;ALL.PP.CURDRINK.COMBINED.regionleads;ALL.PP.CURDRINK.FEMALE.locusleads;ALL.PP.CURDRINK.FEMALE.regionleads;ALL.PP.CURDRINK.MALE.locusleads;ALL.PP.CURDRINK.MALE.regionleads;ALL.PP.HEAVYvsLIGHT.COMBINED.locusleads;ALL.PP.HEAVYvsLIGHT.COMBINED.regionleads;ALL.PP.HEAVYvsLIGHT.MALE.locusleads;ALL.PP.HEAVYvsLIGHT.MALE.regionleads;EUR.PP.CURDRINK.COMBINED.locusleads;EU…
rs56080003	17:48941687:A_T	SNF8	known	0	17	48941687	a	t	0.4675	-0.1359	0.04872	0.00528044	-0.06912	0.06092	0.256542	-0.00237	38.951	3.483e-09	1.95703e-06	1009280	658204	-?--++	+?+---	8	0.3444	ALL.SBP.CURDRINK.COMBINED.locusleads	41.34	ALL.DBP.HEAVYvsLIGHT.COMBINED.locusleads;ALL.SBP.CURDRINK.COMBINED.locusleads;ALL.SBP.HEAVYvsLIGHT.COMBINED.locusleads
rs726816	8:94956185:G_T	TP53INP1	known	6798	8	94956185	t	g	0.4556	0.2066	0.03498	3.50021e-09	-0.07997	0.0705	0.256658	-0.001222	39.164	3.131e-09	1.58042e-06	750596	208489	++++-	+----	8	0.993	ALL.SBP.HEAVYvsLIGHT.COMBINED.locusleads	359.2	ALL.SBP.CURDRINK.COMBINED.locusleads;ALL.SBP.CURDRINK.COMBINED.regionleads;ALL.SBP.HEAVYvsLIGHT.COMBINED.locusleads;ALL.SBP.HEAVYvsLIGHT.COMBINED.regionleads
rs10439377	2:19585679:C_T	OSR1	known	227068	2	19585679	t	c	0.6051	-0.08888	0.0346	0.0102055	-0.04689	0.04135	0.256804	-0.001196	42.366	6.313e-10	4.746e-07	1144840	764898	+-----	-----+	10	0.1419	ALL.PP.CURDRINK.COMBINED.locusleads	54.5	ALL.PP.CURDRINK.COMBINED.locusleads;EUR.PP.CURDRINK.COMBINED.locusleads;EUR.PP.HEAVYvsLIGHT.COMBINED.locusleads
rs75255502	1:169126077:G_T	ATP1B1	known	0	1	169126077	t	g	0.6836	0.2608	0.03952	4.13409e-11	-0.05396	0.0476	0.256957	-0.00156	103.731	2.986e-23	1.29566e-19	1014790	660213	+?+++-	-?+---	8	0.1124	ALL.PP.CURDRINK.COMBINED.regionleads	115.1	ALL.PP.CURDRINK.COMBINED.locusleads;ALL.PP.CURDRINK.COMBINED.regionleads;ALL.PP.CURDRINK.FEMALE.locusleads;ALL.PP.CURDRINK.FEMALE.regionleads;ALL.PP.CURDRINK.MALE.locusleads;ALL.PP.CURDRINK.MALE.regionleads;ALL.PP.HEAVYvsLIGHT.COMBINED.locusleads;ALL.PP.HEAVYvsLIGHT.COMBINED.regionleads;ALL.PP.HEAVYvsLIGHT.MALE.locusleads;ALL.PP.HEAVYvsLIGHT.MALE.regionleads;ALL.PP.HEAVYvsNEVER.COMBINED.locuslead…
rs11082867	18:51264472:A_C	MEX3C	known	66791	18	51264472	a	c	0.7332	-0.1528	0.0313	1.05128e-06	0.0427	0.03767	0.256993	-0.0009791	51.252	7.427e-12	7.80802e-09	1145520	764804	-+----	+-++++	10	0.1577	ALL.DBP.CURDRINK.COMBINED.regionleads	367.1	ALL.DBP.CURDRINK.COMBINED.locusleads;ALL.DBP.CURDRINK.COMBINED.regionleads;ALL.SBP.CURDRINK.COMBINED.locusleads;ALL.SBP.CURDRINK.COMBINED.regionleads;EUR.DBP.CURDRINK.COMBINED.locusleads;EUR.DBP.CURDRINK.COMBINED.regionleads;EUR.SBP.CURDRINK.COMBINED.locusleads;EUR.SBP.CURDRINK.COMBINED.regionleads
rs752225809	10:30891427:C_CATT	ZNF438	known	0	10	30891427	catt	c	0.687	0.1239	0.04257	0.00360851	0.05739	0.05065	0.257185	-0.001807	51.47	6.66e-12	7.21374e-09	876385	618105	+?-+++	-?++--	8	0.3127	ALL.PP.CURDRINK.COMBINED.locusleads	363.1	ALL.PP.CURDRINK.COMBINED.locusleads;ALL.PP.CURDRINK.COMBINED.regionleads;ALL.PP.HEAVYvsLIGHT.COMBINED.locusleads;ALL.PP.HEAVYvsLIGHT.COMBINED.regionleads;ALL.PP.LIGHTvsNEVER.COMBINED.locusleads;ALL.PP.LIGHTvsNEVER.COMBINED.regionleads;EUR.PP.CURDRINK.COMBINED.locusleads;EUR.PP.CURDRINK.COMBINED.regionleads;EUR.PP.HEAVYvsLIGHT.COMBINED.locusleads;EUR.PP.HEAVYvsLIGHT.COMBINED.regionleads;EUR.PP.LIG…
rs1522554	3:70864142:C_G	FOXP1	known	-90571	3	70864142	c	g	0.3778	-0.2213	0.04627	1.72873e-06	0.06437	0.05685	0.257518	-0.002135	45.051	1.649e-10	1.23473e-07	1145780	764847	-+----	+-++++	10	0.01214	ALL.SBP.CURDRINK.COMBINED.locusleads	449.1	ALL.SBP.CURDRINK.COMBINED.locusleads;ALL.SBP.CURDRINK.COMBINED.regionleads;EUR.SBP.CURDRINK.COMBINED.locusleads;EUR.SBP.CURDRINK.COMBINED.regionleads
rs28401288	1:1639348:G_T	CDK11B	known	0	1	1639348	t	g	0.3178	-0.1642	0.0434	0.000154694	-0.05806	0.0513	0.25773	-0.001881	79.837	4.608e-18	1.19833e-14	962504	679492	+?----	-?--++	8	0.2457	ALL.PP.CURDRINK.COMBINED.locusleads	171.1	ALL.PP.CURDRINK.COMBINED.locusleads;ALL.PP.CURDRINK.COMBINED.regionleads;ALL.PP.CURDRINK.MALE.locusleads;ALL.PP.HEAVYvsLIGHT.COMBINED.locusleads;ALL.PP.HEAVYvsLIGHT.COMBINED.regionleads;ALL.PP.HEAVYvsLIGHT.MALE.locusleads;ALL.PP.HEAVYvsLIGHT.MALE.regionleads;ALL.PP.LIGHTvsNEVER.COMBINED.locusleads;ALL.PP.LIGHTvsNEVER.COMBINED.regionleads;ALL.SBP.CURDRINK.COMBINED.locusleads;EUR.PP.CURDRINK.COMBIN…
rs7268343	20:44125600:A_G	JPH2	known	0	20	44125600	a	g	0.1401	0.1917	0.06011	0.0014269	0.08518	0.07535	0.258283	-0.003606	46.948	6.388e-11	5.21109e-08	1146190	764890	--++++	+-----	10	0.3051	ALL.SBP.CURDRINK.COMBINED.locusleads	75.4	ALL.DBP.CURDRINK.COMBINED.locusleads;ALL.SBP.CURDRINK.COMBINED.locusleads;ALL.SBP.HEAVYvsLIGHT.COMBINED.locusleads
rs75133263	2:175424656:C_T	ATP5G3	known	242894	2	175424656	t	c	0.2013	0.08879	0.0322	0.00582535	0.04608	0.04077	0.258374	-0.001036	36.576	1.142e-08	5.84811e-06	1146170	764874	+-++++	++++-+	10	0.6529	ALL.DBP.CURDRINK.COMBINED.locusleads	228.5	ALL.DBP.CURDRINK.COMBINED.locusleads;ALL.DBP.CURDRINK.COMBINED.regionleads
rs35935487	4:103021162:A_AG	SLC9B1	known	1423	4	103021162	a	ag	0.3472	-0.1335	0.02832	2.42921e-06	-0.04012	0.0355	0.258417	-0.0008016	87.827	8.483e-20	3.25195e-16	1051660	692890	-?----	-?+--+	8	0.9584	ALL.DBP.CURDRINK.COMBINED.locusleads	146.1	ALL.DBP.CURDRINK.COMBINED.locusleads;ALL.DBP.CURDRINK.FEMALE.locusleads;ALL.DBP.CURDRINK.MALE.locusleads;ALL.DBP.HEAVYvsLIGHT.COMBINED.locusleads;ALL.DBP.HEAVYvsLIGHT.FEMALE.locusleads;ALL.DBP.HEAVYvsLIGHT.FEMALE.regionleads;ALL.DBP.HEAVYvsLIGHT.MALE.locusleads;ALL.DBP.LIGHTvsNEVER.COMBINED.locusleads;ALL.DBP.LIGHTvsNEVER.FEMALE.locusleads;ALL.DBP.LIGHTvsNEVER.FEMALE.regionleads;ALL.DBP.LIGHTvsNE…
rs1322756	6:125899077:A_G	NCOA7	known	0	6	125899077	a	g	0.5669	-0.2412	0.04584	1.42667e-07	0.06298	0.05575	0.258609	-0.002095	58.627	1.859e-13	2.40144e-10	1146880	765919	----+-	++++-+	10	0.2979	ALL.SBP.CURDRINK.COMBINED.locusleads	21.5	ALL.PP.CURDRINK.COMBINED.locusleads;ALL.SBP.CURDRINK.COMBINED.locusleads;ALL.SBP.CURDRINK.MALE.locusleads;ALL.SBP.HEAVYvsLIGHT.COMBINED.locusleads;ALL.SBP.LIGHTvsNEVER.COMBINED.locusleads;EUR.SBP.CURDRINK.COMBINED.locusleads
rs3017892	4:101162044:A_G	PPP3CA	known	0	4	101162044	a	g	0.3542	-0.1031	0.02735	0.000163475	-0.03796	0.03365	0.259285	-0.0007472	65.666	5.507e-15	1.04985e-11	1148430	766195	------	+++-++	10	0.3293	ALL.DBP.CURDRINK.COMBINED.locusleads	243.1	ALL.DBP.CURDRINK.COMBINED.locusleads;ALL.DBP.CURDRINK.FEMALE.locusleads;ALL.DBP.CURDRINK.FEMALE.regionleads;ALL.DBP.HEAVYvsLIGHT.COMBINED.locusleads;ALL.DBP.HEAVYvsLIGHT.COMBINED.regionleads;ALL.DBP.HEAVYvsLIGHT.FEMALE.locusleads;ALL.DBP.HEAVYvsLIGHT.FEMALE.regionleads;ALL.DBP.LIGHTvsNEVER.COMBINED.locusleads;ALL.DBP.LIGHTvsNEVER.COMBINED.regionleads;ALL.SBP.CURDRINK.COMBINED.locusleads;ALL.SBP.C…
rs66563455	18:786568:C_T	YES1	known	0	18	786568	t	c	0.7956	0.3393	0.05315	1.72725e-10	-0.07476	0.06641	0.260278	-0.002824	84.726	4e-19	1.14559e-15	1146980	764959	+++++-	---+-+	10	0.5607	ALL.SBP.CURDRINK.COMBINED.locusleads	153.1	ALL.DBP.CURDRINK.COMBINED.locusleads;ALL.DBP.CURDRINK.COMBINED.regionleads;ALL.DBP.CURDRINK.FEMALE.locusleads;ALL.DBP.CURDRINK.FEMALE.regionleads;ALL.DBP.CURDRINK.MALE.locusleads;ALL.DBP.CURDRINK.MALE.regionleads;ALL.DBP.HEAVYvsLIGHT.COMBINED.locusleads;ALL.DBP.HEAVYvsLIGHT.COMBINED.regionleads;ALL.DBP.HEAVYvsNEVER.COMBINED.locusleads;ALL.DBP.HEAVYvsNEVER.COMBINED.regionleads;ALL.PP.CURDRINK.COMB…
rs13243905	7:46511909:A_G	IGFBP3	known	590637	7	46511909	a	g	0.9495	-0.351	0.07885	8.52764e-06	0.1046	0.09294	0.260395	-0.006215	44.806	1.864e-10	1.56116e-07	1102860	744114	+---+-	-+-+--	10	0.006377	ALL.PP.CURDRINK.COMBINED.locusleads	5.1	ALL.PP.CURDRINK.COMBINED.locusleads;ALL.PP.CURDRINK.MALE.locusleads;ALL.PP.LIGHTvsNEVER.MALE.locusleads
rs2949200	7:1161709:C_T	LOC101927021	known	0	7	1161709	t	c	0.4279	-0.1927	0.04004	1.48914e-06	0.06261	0.05567	0.260732	-0.001603	34.447	3.311e-08	5.60236e-05	354642	188570	-----	+++-+	8	0.7405	ALL.DBP.HEAVYvsNEVER.COMBINED.locusleads	355.5	ALL.DBP.HEAVYvsNEVER.COMBINED.locusleads
rs6847086	4:56925698:A_G	REST	known	0	4	56925698	a	g	0.3517	0.07193	0.0274	0.00866025	0.03771	0.03354	0.260873	-0.0007505	38.948	3.488e-09	2.04907e-06	1147220	765148	++++++	+-++-+	10	0.9728	ALL.DBP.CURDRINK.COMBINED.locusleads	567.1	ALL.DBP.CURDRINK.COMBINED.locusleads;ALL.DBP.CURDRINK.COMBINED.regionleads;ALL.DBP.HEAVYvsLIGHT.COMBINED.locusleads;ALL.DBP.HEAVYvsLIGHT.COMBINED.regionleads
rs6778612	3:27329298:C_T	NEK10	known	0	3	27329298	t	c	0.2129	0.3556	0.05585	1.92693e-10	-0.07558	0.06737	0.26192	-0.003118	95.583	1.755e-21	6.61454e-18	1143450	764403	--++++	+-----	10	0.000288	ALL.SBP.CURDRINK.COMBINED.locusleads	45.2	ALL.DBP.CURDRINK.COMBINED.locusleads;ALL.DBP.CURDRINK.FEMALE.locusleads;ALL.DBP.HEAVYvsLIGHT.COMBINED.locusleads;ALL.DBP.HEAVYvsLIGHT.MALE.locusleads;ALL.DBP.LIGHTvsNEVER.FEMALE.locusleads;ALL.PP.CURDRINK.COMBINED.locusleads;ALL.PP.LIGHTvsNEVER.COMBINED.locusleads;ALL.SBP.CURDRINK.COMBINED.locusleads;ALL.SBP.CURDRINK.FEMALE.locusleads;ALL.SBP.CURDRINK.MALE.locusleads;ALL.SBP.HEAVYvsLIGHT.COMBINED…
rs7427249	3:37530998:A_G	ITGA9	known	0	3	37530998	a	g	0.6154	-0.2324	0.04675	6.65662e-07	0.0635	0.05662	0.26207	-0.002183	52.463	4.054e-12	4.08869e-09	1148490	766226	------	++-+-+	10	0.9153	ALL.SBP.CURDRINK.COMBINED.regionleads	210.2	ALL.PP.CURDRINK.COMBINED.locusleads;ALL.PP.HEAVYvsLIGHT.COMBINED.locusleads;ALL.SBP.CURDRINK.COMBINED.locusleads;ALL.SBP.CURDRINK.COMBINED.regionleads;ALL.SBP.CURDRINK.MALE.locusleads;ALL.SBP.CURDRINK.MALE.regionleads;ALL.SBP.HEAVYvsLIGHT.COMBINED.locusleads;ALL.SBP.HEAVYvsLIGHT.COMBINED.regionleads;EUR.PP.CURDRINK.COMBINED.locusleads;EUR.SBP.CURDRINK.COMBINED.locusleads;EUR.SBP.CURDRINK.COMBINED…
rs72792003	16:66708356:G_T	CMTM4	known	11649	16	66708356	t	g	0.9612	-0.3751	0.0878	1.93546e-05	0.1138	0.1016	0.26268	-0.007706	44.299	2.403e-10	1.87515e-07	911302	661262	+??--+	-??++-	6	0.01612	ALL.DBP.CURDRINK.COMBINED.locusleads	442.2	ALL.DBP.CURDRINK.COMBINED.locusleads;ALL.DBP.CURDRINK.COMBINED.regionleads;ALL.DBP.CURDRINK.MALE.locusleads;ALL.DBP.CURDRINK.MALE.regionleads;EUR.DBP.CURDRINK.MALE.locusleads;EUR.DBP.CURDRINK.MALE.regionleads
rs3020333	6:151689119:A_G	ESR1	known	-1376	6	151689119	a	g	0.5697	0.1096	0.02462	8.52069e-06	0.05467	0.04883	0.262885	-0.0006056	34.939	2.589e-08	1.12679e-05	750544	208472	++++-	+++-+	8	0.9841	ALL.PP.HEAVYvsLIGHT.COMBINED.locusleads	44.6	ALL.PP.HEAVYvsLIGHT.COMBINED.locusleads
rs13194508	6:126823538:C_T	RSPO3	known	-295364	6	126823538	t	c	0.8054	0.1994	0.03908	3.35454e-07	-0.05118	0.04578	0.263586	-0.001525	64.308	1.086e-14	1.95555e-11	1083880	720843	++++++	--+---	10	0.5914	ALL.DBP.CURDRINK.COMBINED.locusleads	21.3	ALL.DBP.CURDRINK.COMBINED.locusleads;ALL.DBP.CURDRINK.MALE.locusleads;ALL.DBP.HEAVYvsLIGHT.COMBINED.locusleads;ALL.DBP.LIGHTvsNEVER.COMBINED.locusleads;ALL.SBP.CURDRINK.COMBINED.locusleads;ALL.SBP.HEAVYvsLIGHT.COMBINED.locusleads
rs7153843	14:52792948:C_T	GNPNAT1	known	1280	14	52792948	t	c	0.5009	-0.0924	0.03157	0.00342437	-0.04308	0.03866	0.265138	-0.0009956	45.218	1.517e-10	1.29248e-07	1074520	721876	+-----	++--+-	10	0.2966	ALL.PP.CURDRINK.COMBINED.locusleads	129.2	ALL.PP.CURDRINK.COMBINED.locusleads;ALL.PP.HEAVYvsLIGHT.COMBINED.locusleads
rs71136027	17:44634577:C_CT	LINC01180	known	-11786	17	44634577	ct	c	0.8892	-0.1909	0.05647	0.000723393	-0.07727	0.06938	0.265399	-0.003187	55.539	8.706e-13	1.08112e-09	955224	655609	-?----	-?+--+	8	0.00595	ALL.PP.CURDRINK.COMBINED.locusleads	41.14	ALL.PP.CURDRINK.COMBINED.locusleads;ALL.PP.HEAVYvsLIGHT.COMBINED.locusleads;ALL.PP.LIGHTvsNEVER.COMBINED.locusleads;ALL.SBP.CURDRINK.COMBINED.locusleads;EUR.PP.CURDRINK.COMBINED.locusleads
rs61608816	15:66572637:C_T	LCTL	known	6658	15	66572637	t	c	0.3804	-0.07474	0.02697	0.00558454	-0.03702	0.03327	0.265831	-0.0007273	40.56	1.558e-09	1.00706e-06	1148340	766156	-++---	+---+-	10	0.04281	ALL.DBP.CURDRINK.COMBINED.locusleads	232.3	ALL.DBP.CURDRINK.COMBINED.locusleads;EUR.DBP.CURDRINK.COMBINED.locusleads
rs16847945	1:224389695:A_G	WDR26	novel-T3	0	1	224389695	a	g	0.9187	0.219	0.07499	0.00349594	0.1067	0.09591	0.265923	-0.00561	37.895	5.906e-09	3.15563e-06	1123620	749580	++-+++	+-+-++	10	0.1392	ALL.SBP.CURDRINK.COMBINED.locusleads	593.1	ALL.SBP.CURDRINK.COMBINED.locusleads;ALL.SBP.CURDRINK.COMBINED.regionleads;ALL.SBP.HEAVYvsLIGHT.COMBINED.locusleads;ALL.SBP.HEAVYvsLIGHT.COMBINED.regionleads
rs10850408	12:114942588:C_T	TBX3	known	258424	12	114942588	t	c	0.287	-0.1756	0.05093	0.000565027	-0.06833	0.06148	0.266388	-0.002592	61.846	3.717e-14	5.37664e-11	1144730	764081	-----+	-+-+--	10	0.7353	ALL.SBP.CURDRINK.COMBINED.locusleads	28.5	ALL.DBP.CURDRINK.COMBINED.locusleads;ALL.DBP.HEAVYvsLIGHT.COMBINED.locusleads;ALL.PP.CURDRINK.COMBINED.locusleads;ALL.SBP.CURDRINK.COMBINED.locusleads;ALL.SBP.CURDRINK.MALE.locusleads;ALL.SBP.HEAVYvsLIGHT.COMBINED.locusleads;ALL.SBP.HEAVYvsLIGHT.MALE.locusleads;ALL.SBP.LIGHTvsNEVER.COMBINED.locusleads;EUR.SBP.CURDRINK.COMBINED.locusleads;EUR.SBP.CURDRINK.MALE.locusleads;EUR.SBP.HEAVYvsLIGHT.COMBI…
rs68078464	1:219508359:A_AT	LYPLAL1	known	295494	1	219508359	a	at	0.4861	0.09574	0.03317	0.00389747	0.04554	0.04099	0.266567	-0.001098	42.423	6.138e-10	4.62515e-07	1051740	692922	+?++--	-?+-++	8	0.06186	ALL.PP.CURDRINK.COMBINED.locusleads	250.2	ALL.PP.CURDRINK.COMBINED.locusleads;ALL.PP.HEAVYvsLIGHT.COMBINED.locusleads
rs11045047	12:20113943:A_G	LOC100506393	known	15075	12	20113943	a	g	0.5964	-0.09986	0.03104	0.00129476	-0.04237	0.03815	0.266734	-0.0009627	51.36	7.036e-12	7.59404e-09	1147030	765062	-----+	+++-+-	10	0.009232	ALL.PP.CURDRINK.COMBINED.locusleads	35.9	ALL.DBP.CURDRINK.COMBINED.locusleads;ALL.PP.CURDRINK.COMBINED.locusleads
rs11191679	10:103405499:A_G	PDCD11	known	0	10	103405499	a	g	0.1325	0.118	0.03982	0.00304325	0.05348	0.04817	0.266898	-0.001585	48.649	2.729e-11	2.55578e-08	1142640	765207	+-++++	-+-+--	10	0.4661	ALL.DBP.CURDRINK.COMBINED.locusleads	8.8	ALL.DBP.CURDRINK.COMBINED.locusleads;ALL.DBP.CURDRINK.MALE.locusleads;ALL.DBP.HEAVYvsLIGHT.COMBINED.locusleads;ALL.DBP.HEAVYvsLIGHT.MALE.locusleads;ALL.DBP.LIGHTvsNEVER.COMBINED.locusleads;EAS.PP.HEAVYvsNEVER.COMBINED.locusleads
rs150599115	11:65623008:A_G	PCNXL3	known	0	11	65623008	a	g	0.0173	-0.5737	0.2183	0.00858797	-0.2885	0.2601	0.267349	-0.04761	43.833	3.032e-10	2.1385e-07	847007	613937	-??-+-	-??--+	6	0.1672	ALL.SBP.CURDRINK.COMBINED.locusleads	114.3	ALL.DBP.CURDRINK.COMBINED.locusleads;ALL.SBP.CURDRINK.COMBINED.locusleads;ALL.SBP.HEAVYvsLIGHT.COMBINED.locusleads;EUR.DBP.CURDRINK.COMBINED.locusleads;EUR.SBP.CURDRINK.COMBINED.locusleads;EUR.SBP.HEAVYvsLIGHT.COMBINED.locusleads
rs4917970	10:102493978:C_T	ACTR1A	known	0	10	102493978	t	c	0.1233	-0.466	0.1123	3.33058e-05	-0.1981	0.1788	0.267887	-0.01258	39.82	2.255e-09	1.31993e-06	235234	99774	-?-?-?	+?-?+?	4	0.3247	ALL.SBP.CURDRINK.COMBINED.locusleads	8.14	ALL.SBP.CURDRINK.COMBINED.locusleads
rs34917858	4:85785118:C_T	ARHGAP24	known	0	4	85785118	t	c	0.4362	-0.195	0.04589	2.14447e-05	0.06174	0.05586	0.269046	-0.002103	35.355	2.102e-08	9.79342e-06	1147020	765309	------	+--+-+	10	0.09467	ALL.SBP.CURDRINK.COMBINED.locusleads	58.3	ALL.PP.CURDRINK.COMBINED.locusleads;ALL.SBP.CURDRINK.COMBINED.locusleads
rs28456272	19:7251082:C_T	INSR	known	0	19	7251082	t	c	0.0343	-0.1925	0.09136	0.0351133	-0.1184	0.1073	0.269833	-0.008343	34.848	2.709e-08	1.25412e-05	922577	667897	-??--+	-??---	6	0.7236	ALL.DBP.CURDRINK.COMBINED.locusleads	32.11	ALL.DBP.CURDRINK.COMBINED.locusleads
rs9661802	1:6618804:A_C	PHF13	known	0	1	6618804	a	c	0.6502	0.1369	0.03112	1.08701e-05	0.04241	0.03847	0.27028	-0.000968	82.017	1.55e-18	4.22457e-15	1148220	766108	++++++	+--+--	10	0.3104	ALL.PP.CURDRINK.COMBINED.regionleads	163.1	ALL.PP.CURDRINK.COMBINED.locusleads;ALL.PP.CURDRINK.COMBINED.regionleads;ALL.PP.CURDRINK.FEMALE.locusleads;ALL.PP.CURDRINK.FEMALE.regionleads;ALL.PP.CURDRINK.MALE.locusleads;ALL.PP.CURDRINK.MALE.regionleads;ALL.PP.HEAVYvsLIGHT.COMBINED.locusleads;ALL.PP.HEAVYvsLIGHT.COMBINED.regionleads;ALL.PP.HEAVYvsLIGHT.FEMALE.locusleads;ALL.PP.HEAVYvsLIGHT.FEMALE.regionleads;ALL.PP.LIGHTvsNEVER.COMBINED.locus…
rs7245490	19:31405025:A_G	TSHZ3	known	55741	19	31405025	a	g	0.5852	-0.1524	0.04588	0.00089468	-0.06158	0.05595	0.27106	-0.002101	55.253	1.004e-12	1.135e-09	1144980	764177	----+-	----++	10	0.1677	ALL.SBP.CURDRINK.COMBINED.regionleads	324.1	ALL.DBP.CURDRINK.COMBINED.locusleads;ALL.DBP.CURDRINK.COMBINED.regionleads;ALL.DBP.CURDRINK.MALE.locusleads;ALL.DBP.CURDRINK.MALE.regionleads;ALL.DBP.HEAVYvsLIGHT.COMBINED.locusleads;ALL.DBP.HEAVYvsLIGHT.COMBINED.regionleads;ALL.DBP.HEAVYvsLIGHT.MALE.locusleads;ALL.DBP.HEAVYvsLIGHT.MALE.regionleads;ALL.PP.CURDRINK.COMBINED.locusleads;ALL.PP.CURDRINK.COMBINED.regionleads;ALL.SBP.CURDRINK.COMBINED.…
rs2374496	2:43199060:C_T	ZFP36L2	known	-23341	2	43199060	t	c	0.7242	-0.08487	0.03184	0.00768705	-0.0419	0.03809	0.271321	-0.001013	43.759	3.146e-10	2.39579e-07	1128680	758109	------	-++-++	10	0.8551	ALL.DBP.CURDRINK.COMBINED.locusleads	135.8	ALL.DBP.CURDRINK.COMBINED.locusleads;ALL.DBP.HEAVYvsLIGHT.COMBINED.locusleads
rs9610505	22:21867813:A_T	MAPK1	known	133	22	21867813	a	t	0.6002	-0.1413	0.03307	1.93073e-05	0.04385	0.03993	0.272129	-0.001093	37.06	8.964e-09	5.20961e-06	1146260	764992	-+----	--++--	10	0.572	ALL.PP.CURDRINK.COMBINED.regionleads	616.1	ALL.PP.CURDRINK.COMBINED.locusleads;ALL.PP.CURDRINK.COMBINED.regionleads
rs2675669	10:73894114:C_T	C10orf55	known	-15854	10	73894114	t	c	0.4967	-0.1599	0.0328	1.08808e-06	0.04343	0.03959	0.272644	-0.001073	50.934	8.707e-12	9.26153e-09	1147090	765094	------	+++-++	10	0.1148	ALL.PP.CURDRINK.COMBINED.locusleads	137.3	ALL.PP.CURDRINK.COMBINED.locusleads;ALL.PP.CURDRINK.MALE.locusleads;ALL.SBP.CURDRINK.COMBINED.locusleads
rs34327838	11:27279736:A_T	CCDC34	known	-58777	11	27279736	a	t	0.2846	-0.1865	0.03588	2.01572e-07	0.04737	0.04323	0.273181	-0.001286	59.984	9.432e-14	1.43656e-10	932690	634563	-?----	-?++++	8	0.9643	ALL.DBP.CURDRINK.COMBINED.locusleads	279.1	ALL.DBP.CURDRINK.COMBINED.locusleads;ALL.DBP.CURDRINK.COMBINED.regionleads;ALL.DBP.CURDRINK.MALE.locusleads;ALL.DBP.CURDRINK.MALE.regionleads;ALL.DBP.HEAVYvsLIGHT.COMBINED.locusleads;ALL.DBP.HEAVYvsLIGHT.COMBINED.regionleads;ALL.DBP.HEAVYvsNEVER.COMBINED.locusleads;ALL.DBP.HEAVYvsNEVER.COMBINED.regionleads;ALL.SBP.CURDRINK.COMBINED.locusleads;ALL.SBP.CURDRINK.COMBINED.regionleads;EUR.DBP.CURDRINK…
rs4471820	19:19162528:C_T	MEF2B,MEF2BNB-MEF2B	known	0	19	19162528	t	c	0.1616	0.1592	0.03	1.11648e-07	0.06353	0.05807	0.273944	-0.0008992	48.174	3.46e-11	2.90093e-08	747356	207616	-++++	+-++-	8	0.524	ALL.DBP.HEAVYvsLIGHT.COMBINED.locusleads	148.2	ALL.DBP.CURDRINK.COMBINED.locusleads;ALL.DBP.HEAVYvsLIGHT.COMBINED.locusleads;ALL.DBP.HEAVYvsLIGHT.COMBINED.regionleads;ALL.DBP.LIGHTvsNEVER.COMBINED.locusleads;ALL.DBP.LIGHTvsNEVER.COMBINED.regionleads;EUR.DBP.HEAVYvsLIGHT.COMBINED.locusleads;EUR.DBP.HEAVYvsLIGHT.COMBINED.regionleads
rs2417055	9:127770493:C_T	SH2D3C	known	0	9	127770493	t	c	0.5995	0.2155	0.04951	1.34498e-05	-0.06486	0.05932	0.274222	-0.002449	40.038	2.022e-09	1.19561e-06	1141610	763443	++++--	-++-++	10	0.123	ALL.SBP.CURDRINK.COMBINED.locusleads	538.1	ALL.SBP.CURDRINK.COMBINED.locusleads;ALL.SBP.CURDRINK.COMBINED.regionleads;EUR.SBP.CURDRINK.COMBINED.locusleads;EUR.SBP.CURDRINK.COMBINED.regionleads
rs911547	10:103879663:A_G	OBFC1	known	0	10	103879663	a	g	0.8386	-0.3065	0.06732	5.2916e-06	0.08836	0.08084	0.274384	-0.004518	43.948	2.863e-10	2.03055e-07	1067740	741613	--+---	-+-+++	10	0.4278	ALL.SBP.CURDRINK.COMBINED.locusleads	8.13	ALL.DBP.CURDRINK.COMBINED.locusleads;ALL.SBP.CURDRINK.COMBINED.locusleads
rs35260781	3:27559380:A_AG	SLC4A7	known	74960	3	27559380	a	ag	0.0196	0.9239	0.2037	5.74423e-06	-0.2719	0.2488	0.274462	-0.04145	41.26	1.098e-09	6.88604e-07	792023	560748	+??+-+	-??-++	6	0.3113	ALL.SBP.CURDRINK.COMBINED.locusleads	45.7	ALL.PP.CURDRINK.COMBINED.locusleads;ALL.SBP.CURDRINK.COMBINED.locusleads
rs11065785	12:110975104:C_T	LOC100131138	known	37658	12	110975104	t	c	0.5497	-0.1169	0.02166	6.77473e-08	-0.04665	0.04273	0.274948	-0.0004681	48.716	2.64e-11	2.27243e-08	751280	208588	-+--+	+--++	8	0.001283	ALL.DBP.HEAVYvsLIGHT.COMBINED.locusleads	13.8	ALL.DBP.CURDRINK.COMBINED.locusleads;ALL.DBP.HEAVYvsLIGHT.COMBINED.locusleads
rs36099421	14:35509287:C_T	INSM2	known	-24754	14	35509287	t	c	0.4761	0.07728	0.03248	0.0173451	0.04296	0.03938	0.275313	-0.001054	34.745	2.852e-08	1.45808e-05	1147160	765123	+-++++	-+-++-	10	0.5092	ALL.PP.CURDRINK.COMBINED.locusleads	214.5	ALL.PP.CURDRINK.COMBINED.locusleads
rs7694411	4:71140729:C_T	SLC4A4	known	-46556	4	71140729	t	c	0.7913	-0.1467	0.05317	0.00579653	-0.07284	0.06681	0.2756	-0.002821	36.769	1.037e-08	5.22583e-06	1147270	765166	-----+	-+----	10	0.2261	ALL.SBP.CURDRINK.COMBINED.regionleads	626.1	ALL.DBP.CURDRINK.COMBINED.locusleads;ALL.DBP.CURDRINK.COMBINED.regionleads;ALL.SBP.CURDRINK.COMBINED.locusleads;ALL.SBP.CURDRINK.COMBINED.regionleads
rs17004846	4:80237067:A_G	FGF5	known	-29520	4	80237067	a	g	0.5729	-0.4474	0.04526	4.83059e-23	-0.06044	0.05545	0.275717	-0.002044	346.352	6.176e-76	6.90814e-71	1145960	764392	------	++---+	10	1.06e-05	ALL.SBP.CURDRINK.COMBINED.locusleads	2.2	ALL.DBP.CURDRINK.COMBINED.locusleads;ALL.DBP.CURDRINK.FEMALE.locusleads;ALL.DBP.CURDRINK.MALE.locusleads;ALL.DBP.HEAVYvsLIGHT.COMBINED.locusleads;ALL.DBP.HEAVYvsLIGHT.FEMALE.locusleads;ALL.DBP.HEAVYvsLIGHT.MALE.locusleads;ALL.DBP.HEAVYvsNEVER.COMBINED.locusleads;ALL.DBP.HEAVYvsNEVER.FEMALE.locusleads;ALL.DBP.HEAVYvsNEVER.MALE.locusleads;ALL.DBP.LIGHTvsNEVER.COMBINED.locusleads;ALL.DBP.LIGHTvsNEVE…
rs61704768	17:28513289:A_C	FOXN1	known	-10651	17	28513289	a	c	0.1851	-0.0961	0.04181	0.0215337	-0.05446	0.05005	0.276546	-0.001747	35.139	2.342e-08	1.2264e-05	1138800	763800	------	++--++	10	0.4317	ALL.PP.CURDRINK.COMBINED.locusleads	370.5	ALL.PP.CURDRINK.COMBINED.locusleads;ALL.PP.HEAVYvsLIGHT.COMBINED.locusleads
rs2383208	9:22132077:A_G	CDKN2B-AS1	known	10983	9	22132077	a	g	0.7869	0.1653	0.03553	3.28084e-06	-0.04852	0.04467	0.277396	-0.001262	40.191	1.874e-09	1.28264e-06	1144380	763659	+++++-	---+++	10	0.2488	ALL.PP.CURDRINK.COMBINED.locusleads	165.3	ALL.PP.CURDRINK.COMBINED.locusleads;ALL.PP.CURDRINK.MALE.locusleads;EAS.PP.CURDRINK.COMBINED.locusleads;EAS.PP.CURDRINK.COMBINED.regionleads
rs117403674	8:74801472:C_G	PI15	known	-23064	8	74801472	c	g	0.0156	-0.3269	0.1715	0.0566343	-0.2111	0.1948	0.278509	-0.0294	37.381	7.636e-09	4.51179e-06	861581	635785	--?---	-+?-++	8	0.3618	ALL.PP.CURDRINK.COMBINED.locusleads	68.12	ALL.PP.CURDRINK.COMBINED.locusleads;ALL.PP.HEAVYvsLIGHT.COMBINED.locusleads;EUR.PP.HEAVYvsLIGHT.COMBINED.locusleads
rs610749	11:117340524:G_T	CEP164	known	0	11	117340524	t	g	0.1924	0.1417	0.03946	0.000329439	0.05256	0.04854	0.278889	-0.001556	59.962	9.535e-14	1.38399e-10	1094980	723737	-+++++	++-++-	10	0.04386	ALL.PP.CURDRINK.COMBINED.locusleads	80.2	ALL.PP.CURDRINK.COMBINED.locusleads;ALL.PP.CURDRINK.MALE.locusleads;ALL.PP.HEAVYvsLIGHT.COMBINED.locusleads;ALL.PP.HEAVYvsLIGHT.MALE.locusleads;EUR.PP.CURDRINK.COMBINED.locusleads;EUR.PP.HEAVYvsLIGHT.COMBINED.locusleads
rs57783949	15:80710515:G_T	ABHD17C	known	0	15	80710515	t	g	0.1972	-0.159	0.05803	0.00614463	-0.07551	0.06985	0.279683	-0.003366	43.781	3.113e-10	2.19126e-07	1141820	765276	+---++	-+++--	10	0.1939	ALL.SBP.CURDRINK.COMBINED.locusleads	51.4	ALL.DBP.CURDRINK.COMBINED.locusleads;ALL.DBP.HEAVYvsLIGHT.COMBINED.locusleads;ALL.SBP.CURDRINK.COMBINED.locusleads;ALL.SBP.HEAVYvsLIGHT.COMBINED.locusleads
rs4763290	12:12600715:C_G	CREBL2	known	-11117	12	12600715	c	g	0.635	0.09958	0.0322	0.00198447	0.04301	0.03983	0.280214	-0.001036	46.45	8.195e-11	7.32492e-08	1095630	723654	--+++-	--++-+	10	0.7741	ALL.PP.CURDRINK.COMBINED.locusleads	167.2	ALL.PP.CURDRINK.COMBINED.locusleads;ALL.PP.HEAVYvsLIGHT.COMBINED.locusleads;ALL.PP.HEAVYvsLIGHT.COMBINED.regionleads;ALL.SBP.CURDRINK.COMBINED.locusleads;EUR.PP.CURDRINK.COMBINED.locusleads;EUR.PP.CURDRINK.COMBINED.regionleads;EUR.PP.HEAVYvsLIGHT.COMBINED.locusleads;EUR.PP.HEAVYvsLIGHT.COMBINED.regionleads
rs2004278	15:74972022:C_T	RPP25	known	14588	15	74972022	t	c	0.3253	0.1483	0.02864	2.2419e-07	0.03771	0.03495	0.280601	-0.0008195	112.427	3.862e-25	2.50986e-21	1147440	766028	++-+++	+++-+-	10	0.05946	ALL.DBP.CURDRINK.COMBINED.locusleads	25.3	ALL.DBP.CURDRINK.COMBINED.locusleads;ALL.DBP.CURDRINK.FEMALE.locusleads;ALL.DBP.CURDRINK.MALE.locusleads;ALL.DBP.HEAVYvsLIGHT.FEMALE.locusleads;ALL.DBP.HEAVYvsLIGHT.MALE.locusleads;ALL.DBP.LIGHTvsNEVER.COMBINED.locusleads;ALL.SBP.CURDRINK.COMBINED.locusleads;ALL.SBP.CURDRINK.FEMALE.locusleads;ALL.SBP.CURDRINK.MALE.locusleads;ALL.SBP.HEAVYvsLIGHT.MALE.locusleads;ALL.SBP.LIGHTvsNEVER.COMBINED.locus…
rs1726751	11:74177521:A_G	PPME1	known	0	11	74177521	a	g	0.4474	0.1386	0.03153	1.10359e-05	-0.04145	0.03842	0.280648	-0.0009918	38.515	4.33e-09	2.72764e-06	1146160	764950	++++++	-++--+	10	0.3249	ALL.PP.CURDRINK.COMBINED.locusleads	578.1	ALL.PP.CURDRINK.COMBINED.locusleads;ALL.PP.CURDRINK.COMBINED.regionleads
rs12209452	6:56060164:A_G	COL21A1	known	0	6	56060164	a	g	0.9533	-0.3695	0.0943	8.91588e-05	-0.1175	0.109	0.281042	-0.008888	94.408	3.159e-21	1.15409e-17	915084	661823	-+?---	+-?-+-	8	0.3373	ALL.PP.CURDRINK.COMBINED.locusleads	69.2	ALL.PP.CURDRINK.COMBINED.locusleads;ALL.PP.CURDRINK.MALE.locusleads;ALL.PP.HEAVYvsLIGHT.COMBINED.locusleads;ALL.PP.HEAVYvsLIGHT.MALE.locusleads;ALL.PP.HEAVYvsNEVER.COMBINED.locusleads;ALL.PP.HEAVYvsNEVER.MALE.locusleads;ALL.PP.HEAVYvsNEVER.MALE.regionleads;ALL.PP.LIGHTvsNEVER.COMBINED.locusleads;EUR.PP.HEAVYvsNEVER.COMBINED.locusleads;EUR.PP.HEAVYvsNEVER.COMBINED.regionleads;EUR.PP.HEAVYvsNEVER.M…
rs11070341	15:41597571:C_T	TYRO3	known	18233	15	41597571	t	c	0.5662	0.1208	0.06624	0.0682018	0.07699	0.07144	0.281173	-0.004386	57.845	7.871e-12	3.58655e-08	426271	366822	++-+++----++-++--++-+--+??+-+-	+++---+-+++-+--++++++++-??--++	54	0.5006	EUR.DBP.LIGHTvsNEVER.COMBINED.regionleads	178.3	ALL.DBP.CURDRINK.COMBINED.locusleads;ALL.DBP.CURDRINK.MALE.locusleads;ALL.DBP.HEAVYvsLIGHT.COMBINED.locusleads;ALL.DBP.HEAVYvsLIGHT.MALE.locusleads;ALL.DBP.LIGHTvsNEVER.COMBINED.locusleads;ALL.DBP.LIGHTvsNEVER.MALE.locusleads;ALL.DBP.LIGHTvsNEVER.MALE.regionleads;EUR.DBP.CURDRINK.COMBINED.locusleads;EUR.DBP.CURDRINK.MALE.locusleads;EUR.DBP.CURDRINK.MALE.regionleads;EUR.DBP.HEAVYvsLIGHT.COMBINED.l…
rs2925345	15:41019601:C_T	INO80	known	0	15	41019601	t	c	0.4781	0.113	0.02744	3.82049e-05	0.03583	0.03329	0.281793	-0.0007515	78.612	8.503e-18	2.60056e-14	1147580	766097	+++++-	-+-++-	10	0.4877	ALL.DBP.CURDRINK.COMBINED.regionleads	178.1	ALL.DBP.CURDRINK.COMBINED.locusleads;ALL.DBP.CURDRINK.COMBINED.regionleads;ALL.DBP.CURDRINK.FEMALE.locusleads;ALL.DBP.CURDRINK.FEMALE.regionleads;ALL.DBP.HEAVYvsLIGHT.COMBINED.locusleads;ALL.DBP.HEAVYvsLIGHT.COMBINED.regionleads;ALL.DBP.HEAVYvsLIGHT.FEMALE.locusleads;ALL.DBP.HEAVYvsLIGHT.FEMALE.regionleads;ALL.DBP.HEAVYvsNEVER.COMBINED.locusleads;ALL.DBP.HEAVYvsNEVER.COMBINED.regionleads;ALL.DBP.…
rs8080754	17:64300285:C_T	PECAM1	known	-19130	17	64300285	t	c	0.6511	0.1675	0.04883	0.000602985	0.06328	0.05886	0.282333	-0.002383	60.974	5.751e-14	8.06728e-11	1148500	766224	-+++++	++-+-+	10	0.4771	ALL.SBP.CURDRINK.COMBINED.locusleads	274.1	ALL.PP.CURDRINK.COMBINED.locusleads;ALL.PP.CURDRINK.COMBINED.regionleads;ALL.PP.CURDRINK.FEMALE.locusleads;ALL.PP.CURDRINK.FEMALE.regionleads;ALL.PP.HEAVYvsLIGHT.COMBINED.locusleads;ALL.PP.HEAVYvsLIGHT.COMBINED.regionleads;ALL.PP.HEAVYvsLIGHT.FEMALE.locusleads;ALL.PP.HEAVYvsLIGHT.FEMALE.regionleads;ALL.PP.LIGHTvsNEVER.COMBINED.locusleads;ALL.PP.LIGHTvsNEVER.COMBINED.regionleads;ALL.SBP.CURDRINK.C…
rs6026699	20:59099221:A_T	SLMO2	known	56375	20	59099221	a	t	0.256	0.1021	0.03544	0.00396509	0.04706	0.04381	0.28274	-0.001255	41.739	8.639e-10	5.95009e-07	944490	619908	-?++++	+?-++-	8	0.2768	ALL.DBP.CURDRINK.COMBINED.locusleads	26.5	ALL.DBP.CURDRINK.COMBINED.locusleads;ALL.DBP.HEAVYvsLIGHT.COMBINED.locusleads
rs75248620	11:9887580:A_G	SBF2	known	0	11	9887580	a	g	0.0734	-0.1742	0.06479	0.00717337	-0.08085	0.07531	0.283019	-0.004196	51.246	7.448e-12	7.82683e-09	898016	644148	--?--+	++?--+	8	0.8391	ALL.DBP.CURDRINK.COMBINED.locusleads	65.6	ALL.DBP.CURDRINK.COMBINED.locusleads;ALL.DBP.HEAVYvsLIGHT.COMBINED.locusleads;ALL.DBP.HEAVYvsLIGHT.FEMALE.locusleads;ALL.SBP.CURDRINK.COMBINED.locusleads;ALL.SBP.HEAVYvsLIGHT.COMBINED.locusleads;EUR.SBP.CURDRINK.COMBINED.locusleads
[truncated: 1,249 more rows]
