# Supplementary material for: Discovery of gene-alcohol interaction loci influencing blood pressure in 1.1 million individuals from multiple populations
Source: Research Square preprint supplement (doi:10.21203/rs.3.rs-9283196/v1), 2026-04-03
Supplement: Supplementary file 1 [file 05c1c058e564b10009f6473c.docx]

## Supplementary Figure 1. Summary of 21 primary 1df GxAlc interaction loci by trait, exposure, population, and sex (Table 1).
