# Supplementary material for: Discovery of gene-alcohol interaction loci influencing blood pressure in 1.1 million individuals from multiple populations
Source: Research Square preprint supplement (doi:10.21203/rs.3.rs-9283196/v1), 2026-04-03
Supplement: Supplementary file 3 [file 3cd917c7e993df46ae98b45f.docx]

## Table 3. Novel blood pressure loci with genome-wide significant 2df joint effects but without gene-alcohol interaction

| **Locus** | **Trait** | **Alcohol Class** | **Sex Class** | **N** | **Group** | **Chr:Position** | **Lead Variant** | **Nearest Gene** | **EA** | **EAF** | **PMarginal** | **bG** | **PG** | **bGxAlc** | **PGxAlc** | **P2df** | **Function** |
| --- | --- | --- | --- | --- | --- | --- | --- | --- | --- | --- | --- | --- | --- | --- | --- | --- | --- |
| 1p32.3 | DBP | HEAVYvsNEVER | COMBINED | 363346 | CPMA | 1:53115998 | rs3820201 | *SLC1A7* | A | 0.46 | 7.0E-09 | -0.24 | 7.4E-07 | 0.10 | 0.214 | 8.9E-09 | i_g_up_tr |
| 1p31.3 | DBP | CURDRINK | COMBINED | 1099520 | CPMA | 1:65676847 | rs4655779 | *LEPR / PDE4B* | A | 0.69 | 2.9E-08 | -0.09 | 3.9E-03 | -0.04 | 0.327 | 3.1E-08 |  |
| 1q42.11 | SBP | CURDRINK | COMBINED | 1123620 | CPMA | 1:224389695 | rs16847945 | *WDR26* | A | 0.92 | 1.1E-08 | 0.22 | 3.5E-03 | 0.04 | 0.704 | 5.9E-09 | 3' UTR |
| 2p22.1 | SBP | LIGHTvsNEVER | MALE | 301746 | CPMA | 2:39542624 | rs56203058 | *MAP4K3-DT* | C | 0.91 | 5.5E-09 | -0.53 | 4.8E-03 | 0.10 | 0.663 | 1.5E-08 | intron |
| 2p16.1 | SBP | HEAVYvsLIGHT | COMBINED | 750591 | CPMA | 2:57764977 | rs13032423 | *ACTG1P22* | A | 0.54 | 7.0E-10 | -0.21 | 1.4E-09 | 0.03 | 0.610 | 1.3E-10 |  |
| 3p14.1 | SBP | LIGHTvsNEVER | COMBINED | 623618 | CPMA | 3:68823375 | rs28475377 | *TAFA4* | A | 0.31 | 8.4E-09 | -0.28 | 1.3E-03 | 0.04 | 0.714 | 1.4E-08 | intron |
| 3q27.3 | PP | CURDRINK | COMBINED | 871116 | CPMA | 3:187170359 | rs77209823 | *RPL39L* | A | 0.05 | 5.3E-09 | -0.34 | 2.6E-04 | 0.07 | 0.550 | 9.6E-09 |  |
| 4q28.3 | SBP | CURDRINK | COMBINED | 1071610 | CPMA | 4:136177315 | rs1283032 | *LINC00613* | T | 0.51 | 1.1E-07 | 0.24 | 7.2E-07 | -0.15 | 0.021 | 2.3E-08 |  |
| 5q23.1 | PP | LIGHTvsNEVER | FEMALE | 8843 | HIS | 5:117929459 | rs72786706 | *LINC02147* | A | 0.10 | 3.7E-03 | -1.90 | 2.9E-08 | 0.81 | 0.218 | 1.7E-08 | intron |
| 6p12.3 | PP | CURDRINK | COMBINED | 994732 | CPMA | 6:49388720 | rs9357615 | *MMUT* | A | 0.45 | 9.4E-09 | -0.13 | 1.4E-04 | 0.02 | 0.649 | 1.3E-08 |  |
| 6q12 | DBP | LIGHTvsNEVER | COMBINED | 609477 | CPMA | 6:63442460 | rs59370398 | *LGSN* | T | 0.51 | 1.0E-08 | 0.19 | 1.6E-06 | -0.07 | 0.214 | 3.7E-09 | up_tr_i_g_up_tr |
| 6q21 | SBP | CURDRINK | COMBINED | 1132400 | CPMA | 6:107013848 | rs57683689 | *MTRES1* | A | 0.09 | 5.3E-08 | -0.37 | 3.7E-07 | 0.21 | 0.043 | 8.4E-09 |  |
| 6q23.3 | SBP | HEAVYvsLIGHT | COMBINED | 652412 | CPMA | 6:135813807 | NA | *PDE7B* | A | 0.36 | 2.9E-08 | 0.24 | 1.9E-08 | -0.11 | 0.152 | 1.5E-08 |  |
| 7p21.3 | SBP | HEAVYvsLIGHT | COMBINED | 750328 | CPMA | 7:12744757 | rs12540769 | *ARL4A* | A | 0.27 | 4.6E-08 | 0.17 | 2.2E-05 | 0.11 | 0.161 | 3.5E-09 |  |
| 7q11.22 | DBP | LIGHTvsNEVER | MALE | 234853 | EUR | 7:72449986 | rs2969138 | *CALN1* | T | 0.40 | 6.9E-05 | -0.44 | 1.7E-05 | 0.26 | 0.017 | 5.0E-08 | i_g_up_tr |
| 7q11.23 | PP | CURDRINK | COMBINED | 1138500 | CPMA | 7:77108751 | rs72508681 | *CCDC146* | T | 0.78 | 2.1E-05 | -0.22 | 7.3E-09 | 0.16 | 0.002 | 2.3E-08 | intron |
| 8p23.2 | DBP | HEAVYvsNEVER | FEMALE | 110850 | CPMA | 8:2519003 | rs58006665 | *LINC03021* | C | 0.06 | 3.0E-01 | -0.68 | 2.3E-06 | 1.34 | 1.0E-04 | 2.6E-08 |  |
| 9p22.3 | SBP | CURDRINK | FEMALE | 493640 | CPMA | 9:15706643 | rs10810431 | *CCDC171* | A | 0.49 | 2.3E-07 | -0.08 | 2.6E-01 | -0.32 | 0.001 | 2.6E-08 | intron |
| 9q21.12 | DBP | HEAVYvsLIGHT | COMBINED | 694392 | CPMA | 9:71171194 | rs1854556 | *TRPM3* | A | 0.58 | 8.3E-09 | -0.14 | 9.0E-09 | 0.07 | 0.090 | 1.2E-08 | i_g_up_tr |
| 9q21.13 | PP | CURDRINK | COMBINED | 1145400 | CPMA | 9:71917710 | rs13283858 | *C9orf85* | T | 0.87 | 5.0E-08 | -0.18 | 1.3E-04 | -3.0E-04 | 0.996 | 5.0E-08 | intron |
| 10q11.22 | SBP | CURDRINK | COMBINED | 1143500 | CPMA | 10:48182406 | rs769009 | *FRMPD2* | T | 0.56 | 2.6E-08 | 0.09 | 5.4E-02 | 0.11 | 0.067 | 1.1E-08 | g_dw_tr_g_up_tr_i |
| 10q26.2 | DBP | HEAVYvsLIGHT | COMBINED | 750280 | CPMA | 10:127982989 | rs11015991 | *PTPRE* | A | 0.27 | 1.1E-08 | 0.13 | 3.9E-08 | -0.01 | 0.816 | 2.3E-08 | i_g_up_tr |
| 12q21.31 | SBP | CURDRINK | COMBINED | 1147240 | CPMA | 12:83724138 | rs7304034 | *LOC107984536* | T | 0.55 | 2.2E-09 | 0.17 | 9.3E-05 | -0.05 | 0.435 | 3.4E-09 |  |
| 13q21.31 | SBP | CURDRINK | COMBINED | 1147240 | CPMA | 13:62297695 | rs599310 | *LINC01074* | A | 0.65 | 3.5E-08 | 0.19 | 5.8E-05 | -0.07 | 0.260 | 2.6E-08 |  |
| 14q23.2 | SBP | HEAVYvsLIGHT | COMBINED | 745913 | CPMA | 14:61832287 | rs17099248 | *SYT16* | A | 0.88 | 2.7E-08 | 0.26 | 1.1E-06 | -0.02 | 0.854 | 2.3E-08 | i_g_up_tr |
| 17q12 | DBP | CURDRINK | MALE | 607140 | CPMA | 17:39740603 | rs72832924 | *GRB7* | T | 0.17 | 2.1E-09 | -0.17 | 2.0E-03 | -0.004 | 0.956 | 9.9E-09 | intron |
| 20p11.23 | DBP | CURDRINK | COMBINED | 1071620 | CPMA | 20:21260779 | rs6035820 | *KIZ / XRN2* | A | 0.66 | 4.4E-08 | -0.08 | 6.4E-03 | -0.04 | 0.334 | 1.8E-08 |  |
| 20q13.2 | DBP | CURDRINK | COMBINED | 1147150 | CPMA | 20:52407694 | rs4371408 | *LOC105372666* | A | 0.63 | 4.9E-08 | 0.05 | 9.7E-02 | 0.05 | 0.133 | 8.1E-09 | g_up_tr_i |
| 22q11.21 | SBP | CURDRINK | COMBINED | 1138150 | CPMA | 22:20714371 | rs641901 | *PI4KA* | A | 0.22 | 6.9E-08 | -0.12 | 2.1E-02 | -0.16 | 0.024 | 4.4E-08 | g_dw_tr_i |
| 22q12.3 | SBP | CURDRINK | COMBINED | 1048390 | CPMA | 22:33681047 | rs3831698 | *LARGE* | T | 0.16 | 7.2E-08 | 0.30 | 1.7E-06 | -0.08 | 0.332 | 2.1E-08 | i_g_up_tr |

Note: Significant 2df joint main and interaction meta-analysis loci (P2df<5E-08 and PFDR<5%). Independent loci were defined by distance>500kb or r2<0.1 between variants. Group: populations from AFR, African; EAS, East Asian; EUR, European; HIS, Hispanic/Latino; and CPMA, cross-population meta-analysis. Chr:Position, chromosome:position (hg38). EA, effect allele. EAF, effect allele frequency. Functional consequence of variants: dw, downstream; g, genic; i, intron; n.c, non-coding; tr, transcript; up, upstream; 3' UTR, 3_prime_untranslated region; 5' UTR, 5_prime_untranslated region.
