# Supplementary material for: Discovery of gene-alcohol interaction loci influencing blood pressure in 1.1 million individuals from multiple populations
Source: Research Square preprint supplement (doi:10.21203/rs.3.rs-9283196/v1), 2026-04-03
Supplement: Supplementary file 4 [file 12c941eb3bfe1ed6e55b618e.xlsx]

## Sheet: ST8. drugs
Supplementary Table 8. Top approved drugs and indications for protein-coding target genes at blood pressure-alcohol interacting loci
Target_gene	Pharmacologically_active	Action	Drug_generic	Drug_groups	First_approval	Summary	ChEMBL_ID	DrugBank_ID	Trade_names	Type	Mechanism	LatePhaseTrials	LatestPhase	MESH_Indications	MESH_Description	Indication	RecentClinicalTrials	Status	Title
IL17RB	unknown	antagonist	Brodalumab	Approved, Investigational	2017	Brodalumabis a monoclonal antibody used to treat moderate to severe plaque psoriasis.	CHEMBL1742996	DB11776	Kyntheum, Siliq	Monoclonal antibody (mAb)	Brodalumab binds with high affinity to interleukin (IL)-17 receptor A, thereby inhibiting several pro-inflammatory cytokines from the IL-17 family.TargetActionsOrganismUInterleukin-17 receptor AantagonistinhibitorHumansUInterleukin-17 receptor BantagonistHumansUInterleukin-17 receptor CantagonistHumansUInterleukin-17 receptor DantagonistHumansUInterleukin-17 receptor EantagonistHumansUInterleukin…	32	4	D007154; D011565; D013167; D015535; D001249	Immune System Diseases; Psoriasis; Spondylitis, Ankylosing; Arthritis, Psoriatic; Asthma	Hidradenitis Suppurativa; Crohn's Disease; Asthma; Crohn's Disease; Rheumatoid Arthritis	NCT03910803; NCT01199302; NCT01902290; NCT01150890; NCT00771030	Unknown status; Terminated; Terminated; Terminated; Completed	Treatment of Moderate Hidradenitis Suppurativa; Long-term Safety Study of Brodalumabin Adults With Crohn's Disease; Study of Efficacy and Safety of Brodalumab Compared With Placebo in Adults With Inadequately Controlled Asthma With High Bronchodilator Reversibility; Brodalumab(AMG 827) in Adults With Moderate to Severe Crohn's Disease; Study to Evaluate the Safety, PK, PD and Efficacy of AMG 827 …
PDE10A	yes	inhibitor	Dipyridamole	Approved, Investigational	1961	Dipyridamole is a phosphodiesterase inhibitor used to prevent postoperative thromboembolic events.	CHEMBL932	DB00975	Aggrenox, Persantine	Small Molecule	cAMP and cAMP-inhibited cGMP 3',5'-cyclic phosphodiesterase 10A Inhibitor; Adenosine deaminase	29	4	D020521; D013927; D003324; D006331; D017202	Stroke; Thrombosis; Coronary Artery Disease; Heart Diseases; Myocardial Ischemia	Diabetes Mellitus; Atherosclerosis; Cerebral Ischemia; Transient Ischemic Attack; Ischemic Heart Disease; Cirrhosis of the Liver; Portal Hypertension; Venous Thrombosis	NCT01613755; NCT00767663; NCT00161070; NCT01295567; NCT04645550	Completed; Completed; Completed; Completed; Completed	Metformin-Dipyridamole Interaction Trial; Persantin Preceding Elective PCI; ESPRIT: European/Australasian Stroke Prevention in Reversible Ischaemia Trial; Can Dipyridamole Induce Protection Against Ischemia and Reperfusion Injury in Patients Undergoing Elective Coronary Artery Bypass Grafting (CABG)?; Apixaban, Warfarin and Aspirin Prevents Portal Vein Thrombosis in Patients After Laparoscopic Sp…
PDE10A	yes	inhibitor	Papaverine	Approved, Investigational	NA	Papaverine is an alkaloid used to treat many types of smooth muscle spasms such as "vascular spasms" associated with acute myocardial infarction and angina pectoris, as well as "visceral spasms".	CHEMBL19224	DB01113	NA	Small Molecule	cAMP and cAMP-inhibited cGMP 3',5'-cyclic phosphodiesterase 10A Inhibitor	5	4	D007172; D004066; D005759; D009120; D064129	Erectile Dysfunction; Digestive System Diseases; Gastroenteritis; Muscle Cramp; Prostatic Neoplasms, Castration-Resistant	Radial Artery Spasm; Prostate Cancer	NCT05861765; NCT00080808	Unknown status; Completed	The Efficacy of Papaverine to Prevent Radial Artery Spasm During Transradial Cerebral Angiography; Nerve-Sparing Radical Prostatectomy With or Without Nerve Grafting Followed by Standard Therapy for Erectile Dysfunction in Treating Patients With Localized Prostate Cancer
PDE10A	yes	antagonist	Triflusal	Approved, Withdrawn	NA	Triflusal is a medication related to acetylsalicylic acid with antithrombotic effects used in the treatment of thromboembolic diseases.	CHEMBL1332032	DB08814	NA	Small Molecule	Prostaglandin G/H synthase 1 Antagonist; Nuclear factor NF-kappa-B p105 subunit Antagonist; Nitric oxide synthase, inducible Agonist	3	4	D013927; D007333	Thrombosis; Insulin Resistance	Atherothrombosis; Infarction Cerebral; Vasospastic Syndrome	NCT02616497; NCT01174693; NCT01612273	Completed; Completed; Completed	ASpirin vs Triflusal for Event Reduction In Atherothrombosis Secondary Prevention (ASTERIAS); Comparison of Triflusal and Clopidogrel in Secondary Prevention of Stroke Based on the Genotyping; The Effect of Triflusal on Peripheral Microcirculation Dysfunction
ADH1A	unknown	substrate	NADH	Approved, Nutraceutical	NA	NADH is a nutrient used in some supplement products.	CHEMBL1234616	DB00157	EnBrace HR, EnLyte	Small Molecule	NADH-ubiquinone oxidoreductase chain 3 Binder	1	4	NA	NA	Parkinson's Disease; Chronic Fatigue Syndrome; Amyotrophic Lateral Sclerosis; Multiple Sclerosis; Heart Failure, Systolic	NCT03815916; NCT02063126; NCT03843710; NCT03993171; NCT03423342	Completed; Completed; Withdrawn; Active, not recruiting; Completed	31P-MRS Imaging to Assess the Effects of CNM-Au8 on Impaired Neuronal Redox State in Parkinson's Disease; Clinical Trial to Measure the Maximun HR After ReConnect Supplementation vs. Placebo in CFS.; 31P-MRS Imaging to Assess the Effects of CNM-Au8 on Impaired Neuronal Redox State in Amyotrophic Lateral Sclerosis (REPAIR-ALS); 31P-MRS Imaging to Assess the Effects of CNM-Au8 on Impaired Neuronal …
GRIK2	unknown	antagonist	Phenobarbital	Approved, Investigational	2022	Phenobarbital is a long-lasting barbiturate and anticonvulsant used in the treatment of all types of seizures, except for absent seizures.	CHEMBL40	DB01174	Donnatal, Luminal, Phenobarb, Phenohytro, Sezaby	Small Molecule	Gamma-aminobutyric acid receptor subunit alpha-1 Potentiator	18	4	D004827; D012640; D009357; D012559; D001007	Epilepsy; Seizures; Neonatal Abstinence Syndrome; Schizophrenia; Anxiety	Neonatal Abstinence Syndrome; Generalized Convulsive Status Epilepticus; Neonatal Seizures; Neonatal Seizures; Neonatal Seizure; Neonatal Encephalopathy; Hypoxic-Ischemic Encephalopathy	NCT03670160; NCT03025906; NCT01720667; NCT02550028; NCT05610085	Completed; Unknown status; Completed; Terminated; Recruiting	Clonidine Versus Phenobarbital as Adjunctive Therapy for Neonatal Abstinence Syndrome; Phenobarbital Versus Valproate for Generalized Convulsive Status Epilepticus; Efficacy of Intravenous Levetiracetam in Neonatal Seizures; Levetiracetam Treatment of Neonatal Seizures; A Dose Escalation Study of Levetiracetam in the Treatment of Neonatal Seizures
GRIK2	unknown	antagonist	Pentobarbital	Approved, Vet approved	1973	Pentobarbital is a barbiturate drug used to induce sleep, cause sedation, and control certain types of seizures.	CHEMBL448	DB00312	Nembutal	Small Molecule	Gamma-aminobutyric acid receptor subunit alpha-1 Potentiator; Gamma-aminobutyric acid receptor subunit alpha-2 Potentiator; Gamma-aminobutyric acid receptor subunit alpha-3 Potentiator	3	3	D007319; D013226; D001930; D019966; D006331	Sleep Initiation and Maintenance Disorders; Status Epilepticus; Brain Injuries; Substance-Related Disorders; Heart Diseases	Substance-Related Disorders	NCT00123578	Withdrawn	GHB Withdrawal Symptoms and Effectiveness of Treatment With Lorazepam Versus Pentobarbital- 1
GRIK2	unknown	antagonist	Primidone	Approved, Investigational, Vet approved	1954	Primidone is an antiepileptic used to treat grand mal, psychomotor, and focal epileptic seizures.	CHEMBL856	DB00794	Mysoline	Small Molecule	Gamma-aminobutyric acid receptor subunit alpha-2 Potentiator; Gamma-aminobutyric acid receptor subunit alpha-3 Potentiator; Gamma-aminobutyric acid receptor subunit alpha-4 Potentiator	0	2	D004827; D012640; D020521	Epilepsy; Seizures; Stroke	Clopidogrel Resistance; Secondary Stroke Prevention; Essential Tremor; Brain and Central Nervous System Tumors; Essential Tremor; Brain and Central Nervous System Tumors	NCT02008123; NCT03101241; NCT00068770; NCT00102596; NCT00404248	Withdrawn; Completed; Terminated; Completed; Completed	Effect of Primidone on Platelet Responsiveness in Patients Determined to be Clopidogrel Resistant; A Phase 2 RCT Study of CX-8998 for Essential Tremor; Celecoxib in Patients With Newly Diagnosed GBM Who Are Receiving Anticonvulsant Drugs and Undergoing RT; Clinical Trial Characterizing the Bioavailability of 1-Octanol in Adults With Ethanol-responsive Essential Tremor; Tetra-O-Methyl Nordihydrogu…
GRIK2	unknown	NA	Glutamic acid	Approved, Investigational, Nutraceutical	NA	Glutamic acid is an amino acid commonly found as a component in total parenteral nutrition.	CHEMBL575060	DB00142	Aminosyn II 7 %, Sulfite-free, Aminosyn-PF 7%, Clinisol 15, Olimel, Periolimel, Plenamine, Premasol, Primene, Prosol, Trophamine 10 %	Small Molecule	Glutamate activates both ionotropic and metabotropic glutamate receptors. The ionotropic ones being non-NMDA (AMPA and kainate) and NMDA receptors.	19	4	D012893	Sleep Wake Disorders	Latent Autoimmune Diabetes in Adults; Cervical Intraepithelial Neoplasia; Glioblastoma; Parkinson's Disease; Parkinson's Disease	NCT04262479; NCT01826045; NCT05664464; NCT05894343; NCT05603312	Completed; Completed; Recruiting; Active, not recruiting; Completed	Injections of Glutamic Acid Decarboxylase (GAD) for LADA Type of Diabetes; Efficacy and Safety Study of PGA (Poly-gamma Glutamic Acid) for Cervical Intraepithelial Neoplasia; Glutamate Inhibitors in Glioblastoma; Long-term Follow-up of Glutamic Acid Decarboxylase (GAD) Gene Transfer in Parkinson's Disease; A Double-blind Study to Evaluate the Safety of Glutamic Acid Decarboxylase Gene Transfer in…
GRM8	unknown	NA	Glutamic acid	Approved, Investigational, Nutraceutical	NA	Glutamic acid is an amino acid commonly found as a component in total parenteral nutrition.	CHEMBL575060	DB00142	Aminosyn II 7 %, Sulfite-free, Aminosyn-PF 7%, Clinisol 15, Olimel, Periolimel, Plenamine, Premasol, Primene, Prosol, Trophamine 10 %	Small Molecule	Glutamate activates both ionotropic and metabotropic glutamate receptors. The ionotropic ones being non-NMDA (AMPA and kainate) and NMDA receptors.	19	4	D012893	Sleep Wake Disorders	Latent Autoimmune Diabetes in Adults; Cervical Intraepithelial Neoplasia; Glioblastoma; Parkinson's Disease; Parkinson's Disease	NCT04262479; NCT01826045; NCT05664464; NCT05894343; NCT05603312	Completed; Completed; Recruiting; Active, not recruiting; Completed	Injections of Glutamic Acid Decarboxylase (GAD) for LADA Type of Diabetes; Efficacy and Safety Study of PGA (Poly-gamma Glutamic Acid) for Cervical Intraepithelial Neoplasia; Glutamate Inhibitors in Glioblastoma; Long-term Follow-up of Glutamic Acid Decarboxylase (GAD) Gene Transfer in Parkinson's Disease; A Double-blind Study to Evaluate the Safety of Glutamic Acid Decarboxylase Gene Transfer in…
DBH	yes	inhibitor	Disulfiram	Approved, Investigational	1951	Disulfiram is a carbamate derivative used to treat alcohol addiction.	CHEMBL964	DB00822	Antabuse	Small Molecule	Dopamine beta-hydroxylase Inhibitor; Aldehyde dehydrogenase, mitochondrial Inhibitor	7	4	D000437; D004478; D005909; D010190; D009373	Alcoholism; Ectoparasitic Infestations; Glioblastoma; Pancreatic Neoplasms; Neoplasms, Germ Cell and Embryonal	Cocaine Dependence; Opioid Dependence; Covid19; Cocaine Dependence; Fatigue; Quality of Life; Methamphetamine Dependence	NCT00149630; NCT04485130; NCT00395850; NCT03891667; NCT00731133	Completed; Terminated; Completed; Completed; Completed	Pharmacogenetics of Disulfiram for Cocaine; DISulfiram for COvid-19 (DISCO) Trial; Disulfiram for Cocaine Abuse; Disulfiram: A Test of Symptom Reduction Among Patients With Previously Treated Lyme Disease; Open-Label Disulfiram for Methamphetamine Dependence
DBH	yes	ligand	Dopamine	Approved, Investigational	1974	Dopamine is a catecholamine neurotransmitter used to treat hemodynamic imbalances, poor perfusion of vital organs, low cardiac output, and hypotension.	CHEMBL59	DB00988	Neoatricon	Small Molecule	D(2) dopamine receptor Agonist; D(1A) dopamine receptor Agonist; D(1B) dopamine receptor Agonist	32	4	D051437; D009203; D002318; D006333; D007022	Renal Insufficiency; Myocardial Infarction; Cardiovascular Diseases; Heart Failure; Hypotension	Neonates and Preterm Infants; Parkinson Disease; Parkinson Disease; Renal Transplant; Coma, Traumatic	NCT04525495; NCT07214285; NCT04332276; NCT03107858; NCT06930261	Unknown status; Not yet recruiting; Completed; Unknown status; Recruiting	Dopaminein Neonate; Evaluation of Long-term Safety in Parkinsonian Patients With Intracerebroventricular Administration of A-dopamine (Anaerobic Dopamine) New; Dopaminergic RestauratIon by Intra VEntriculaire Administration; The Effect of Norepinephrine Versus Dopaminein Renal Transplant Recipients on Postoperative Graft Function; Dopaminergic Disruption Induced by Traumatic Coma:Dopaminergic Pat…
ANXA2	yes	inducer	Fluocinolone acetonide	Approved, Investigational, Vet approved	1963	Fluocinolone acetonide is a corticosteroid used to treat skin conditions, eczematous otitis externa, diabetic macular edema, and non-infectious uveitis of the posterior segment of the eye.	CHEMBL989	DB00591	Capex, Derma-Smoothe/FS, Derma-smoothe FS, Dermotic, Flac, Iluvien, Neo-synalar, Otixal, Otovel, Retisert, Synalar, Tri-luma, Yutiq	Small Molecule	Glucocorticoid receptor Agonist; Annexin A1 Inducer; Annexin A2 Inducer	35	4	D008548; D005128; D014605; D011565; D012871	Melanosis; Eye Diseases; Uveitis; Psoriasis; Skin Diseases	Non-infectious Uveitis; Noninfectious Posterior Uveitis; Macular Edema; Retinal Vein Occlusion; Age-Related Macular Degeneration; Diabetic Macular Edema	NCT00456482; NCT00407082; NCT00770770; NCT00695318; NCT00502541	Terminated; Completed; Terminated; Terminated; Completed	Safety and Efficacy of Fluocinolone Acetonide Intravitreal Implant; Safety and Efficacy of Fluocinolone Acetonide Intravitreal Implants; Fluocinolone Acetonide Intravitreal Inserts for Vein Occlusion in Retina; Fluocinolone Acetonide Intravitreal Inserts in Geographic Atrophy; Efficacy of Fluocinolone Acetonide Intravitreal Implant in Diabetic Macular Edema
ANXA2	unknown	ligand	Artenimol	Approved, Investigational	NA	Artenimol is an artemisinin derivative and antimalarial agent used in the treatment of uncomplicated Plasmodium falciparum infections Label. It was first authorized for market by the European Medicines Agency in October 2011 in combination with Piperaquine as the product Eurartesim. Artemisinin combination therapy is highly effective against malaria and stongly recommended by the World Health Org…	CHEMBL307261	DB11638	Eurartesim	Small Molecule	Artemisinins, including Artenimol which is a major active metabolite of many artemisinins, are thought to act via a common mechanism. While the exact mechanism of action is not certain, theories exist as to how artemisinins produce their antimalarial effect. Artemisinins are believed to bind to haem within the P. falciparumparasite. The source of this haem varies with the life stage of the parasi…	99	4	D008288; D005334; D016780; D016778; D011085	Malaria; Fever; Malaria, Vivax; Malaria, Falciparum; Polycystic Ovary Syndrome	Anal High-grade Squamous Intraepithelial Lesion; Anal HSIL; Anal HPV Infection; 1 more; Polycystic Ovary Syndrome; Malaria,Falciparum; Vulvar Diseases; HPV Infection; Vulvar HSIL; 10 more; Anal High Grade Squamous Intraepithelial Lesion; Anal Precancerous Condition; AIN 2/3; 3 more	NCT06206564; NCT06417099; NCT04049916; NCT06075264; NCT05555862	Recruiting; Completed; Completed; Recruiting; Active, not recruiting	Artesunate Ointment for the Treatment of Anal HSIL in HIV-negative Participants; Efficacy of Dihydroartemisinin for Treating PCOS; Pyronaridine-artesunate With Low Dose Primaquine for Preventing P. Falciparum Transmission; Phase II Study of Artesunate Ointment for the Treatment of Vulvar High Grade Squamous Intraepithelial Lesions (Vulvar HSIL, VIN2/3); Artesunate Suppositories for the Treatment …
Notes: Used ChEMBL, DrugBank and ClinicalTrials.gov databases to highlight top approved drugs for target genes that have been evaluated in clinical trials.
