# Supplementary material for: Discovery of gene-alcohol interaction loci influencing blood pressure in 1.1 million individuals from multiple populations
Source: Research Square preprint supplement (doi:10.21203/rs.3.rs-9283196/v1), 2026-04-03
Supplement: Supplementary file 4 [file 40b14b7b33c5c423707c7c7b.docx]

## Table 1. Primary gene-alcohol interaction loci identified for blood pressure from 1df test

| **Locus** | **Trait** | **Alcohol Class** | **Sex Class** | **N** | **Group** | **Chr:Position** | **Lead Variant** | **Nearest Gene** | **EA** | **EAF** | **PMarginal** | **bG** | **PG** | **bGxAlc** | **PGxAlc** | **PSexDiff** | **Function** |
| --- | --- | --- | --- | --- | --- | --- | --- | --- | --- | --- | --- | --- | --- | --- | --- | --- | --- |
| ***Novel BP loci with significant GxAlc interaction*** | | | | | | | | | | | | | | | | | |
| 2p21 | PP | HEAVYvsNEVER | COMBINED | 37,103 | EUR | 2:45054724 | rs578068419 | *SIX2* | T | 0.0034 | 0.6 | 6.91 | 3.0E-06 | -11.60 | 7.3E-09* |  |  |
| 7q31.33 | PP | HEAVYvsNEVER | COMBINED | 101,759 | EAS | 7:126565394 | rs140219321 | *GRM8* | C | 0.9843 | 0.47 | 0.87 | 4.7E-04 | -3.15 | 5.0E-09* |  | i_g_dw_tr |
| 15q22.2 | SBP | HEAVYvsLIGHT | MALE | 106,137 | CPMA | 15:60191621 | rs336527 | *LOC105370839 /*  *ANXA2* | A | 0.9487 | 0.47 | -0.87 | 0.12 | 8.92 | 4.0E-09* | n.a. | g_up_tr_i |
| ***Known BP loci with significant GxAlc interaction*** | | | | | | | | | | | | | | | | | |
| 1p36.12 | PP | HEAVYvsLIGHT | MALE | 55,199 | EAS | 1:20647448 | rs12028312 | *PINK1* | C | 0.7041 | 7.0E-06† | 0.56 | 5.7E-09 | -0.59 | 2.8E-04 | 0.015 | intron |
| 1p34.2 | DBP | LIGHTvsNEVER | MALE | 9,242 | HIS | 1:40133103 | rs4492609 | *PPT1 / RLF* | T | 0.7623 | 4.1E-06† | 1.28 | 4.9E-05 | -1.53 | 3.8E-04 | 0.035 |  |
| 1p31.3 | PP | HEAVYvsLIGHT | COMBINED | 140,915 | EUR | 1:64708479 | rs562453676 | *CACHD1* | A | 0.9909 | 0.45 | 0.87 | 0.011 | -6.94 | 5.7E-10* |  |  |
| 1q24.3 | PP | CURDRINK | COMBINED | 24,719 | HIS | 1:171959446 | rs79684633 | *DNM3* | T | 0.9944 | 0.36 | 2.50 | 6.7E-03 | -8.41 | 1.5E-08* |  | intron |
| 1q41 | SBP | CURDRINK | FEMALE | 18,716 | AFR | 1:217179072 | rs11117785 | *ESRRG* | T | 0.9799 | 0.25 | 4.16 | 4.9E-06 | -10.09 | 8.0E-10* | 6.0E-11 |  |
| 2q24.3 | PP | HEAVYvsNEVER | COMBINED | 195,504 | EUR | 2:163895894 | rs79563921 | *FIGN / GRB14* | A | 0.0084 | 0.89 | 2.05 | 1.0E-04 | -4.38 | 3.9E-09* |  |  |
| 3p21.1 | SBP | LIGHTvsNEVER | COMBINED | 129,511 | EAS | 3:53789071 | rs3774602 | *CACNA1D* | C | 0.6567 | 9.8E-07† | 0.62 | 3.3E-11 | -0.66 | 3.0E-05 |  | i_g_dw_tr |
| 4q13.1 | PP | HEAVYvsNEVER | COMBINED | 207,557 | CPMA | 4:62940142 | rs137958729 | *ADGRL3* | C | 0.9958 | 0.67 | 3.71 | 1.1E-06 | -6.01 | 7.3E-09* |  |  |
| 4q21.21 | SBP | HEAVYvsNEVER | FEMALE | 173,189 | CPMA | 4:80261400 | rs12509595 | *FGF5* | C | 0.3002 | 1.3E-40† | 0.84 | 1.8E-21 | 1.01 | 1.3E-05 | 0.003 |  |
| 4q23 | SBP | CURDRINK | COMBINED | 1,078,720 | CPMA | 4:99318162 | rs1229984 | *ADH1B* | C | 0.5155 | 2.0E-07† | -0.02 | 0.80 | 0.56 | 1.1E-06 |  | missense |
| 5q14.1 | PP | LIGHTvsNEVER | MALE | 12,392 | AFR | 5:80645829 | rs113808516 | *DHFR* | T | 0.0125 | 0.18 | 10.27 | 1.9E-08 | -11.57 | 2.5E-08* | n.a. | intron |
| 8q22.1 | PP | LIGHTvsNEVER | FEMALE | 9,004 | HIS | 8:95543831 | rs6471542 | *C8orf37-AS1* | C | 0.4907 | 5.2E-06† | 1.12 | 2.1E-08 | -1.50 | 1.6E-04 | 0.009 | intron |
| 9q34.2 | SBP | LIGHTvsNEVER | FEMALE | 6,001 | HIS | 9:133232115 | rs12341695 | *OBP2B* | C | 0.0641 | 1.6E-06† | 5.09 | 2.8E-10 | -5.74 | 9.7E-06 | 2.9E-05 |  |
| 10p12.31 | SBP | LIGHTvsNEVER | COMBINED | 32,597 | CPMA | 10:20502180 | rs150916804 | *PLXDC2* | G | 0.0176 | 0.29 | 3.68 | 2.4E-05 | -7.76 | 1.5E-08* |  |  |
| 12q24.12 | SBP | CURDRINK | COMBINED | 173,636 | EAS | 12:111681367 | rs11066001 | BRAP | T | 0.8081 | 2.8E-47† | 0.49 | 1.5E-06 | 2.40 | 3.5E-33* |  | i_g_up_tr |
| 12q24.13 | SBP | HEAVYvsLIGHT | MALE | 55,203 | EAS | 12:112838931 | rs4766660 | *RPH3A* | G | 0.6210 | 3.9E-07† | 0.83 | 4.0E-09 | -0.96 | 6.6E-05 | 0.047 | i_g_up_tr |
| 14q24.2 | PP | CURDRINK | COMBINED | 839,638 | EUR | 14:72821222 | rs8015900 | *DPF3* | A | 0.2136 | 1.7E-10† | 0.37 | 6.7E-13 | -0.31 | 1.6E-06 |  | Intron |
| 15q22.2 | PP | HEAVYvsNEVER | COMBINED | 221,177 | EUR | 15:62516340 | rs956006 | *TLN2* | C | 0.6650 | 1.3E-08† | 0.56 | 6.4E-11 | -0.59 | 1.2E-06 |  | intron |

Note: Significant GxAlc interaction loci were identified from 1df test with genome-wide significant interaction* (PGxAlc<5E-08 and PFDR<5%) or by the 2-step approach †(PGxAlc<0.05/Meff, where Meff is the number of effective independent tests after filtering for PMarginal<10-5). Independent loci were defined by distance>500kb or r2<0.1 between variants. N: sample size used in the analysis. Group: populations from AFR, African; EAS, East Asian; EUR, European; HIS, Hispanic/Latino; and CPMA, cross-population meta-analysis. Chr:Position, chromosome:position (hg38). EA, effect allele. EAF, effect allele frequency. PSexDiff: Significance of sex difference; n.a., not available due to small female sample size. Function, Functional consequence of variants: dw, downstream; g, genic; i, intron; n.c, non-coding; tr, transcript; up, upstream ; 3' UTR, 3_prime_untranslated region; 5' UTR, 5_prime_untranslated region.
