# Supplementary material for: Discovery of gene-alcohol interaction loci influencing blood pressure in 1.1 million individuals from multiple populations
Source: Research Square preprint supplement (doi:10.21203/rs.3.rs-9283196/v1), 2026-04-03
Supplement: Supplementary file 6 [file 8b800aa140deea179e7cb8d6.docx]

## Table 2. Secondary gene-alcohol interaction loci for blood pressure with genome-wide significant 2df joint effects

| **Locus** | **Trait** | **Alcohol Class** | **Sex Class** | **N** | **Group** | **Chr:Position** | **Lead Variant** | **Nearest Gene** | **EA** | **EAF** | **bG** | **PG** | **bGxAlc** | **PGxAlc** | **P2df** | **Function** |
| --- | --- | --- | --- | --- | --- | --- | --- | --- | --- | --- | --- | --- | --- | --- | --- | --- |
| ***Novel BP loci with 2df joint meta-analysis BP loci and GxAlc interaction*** | | | | | | | | | | | | | | | |  |
| 6q16.3 | PP | LIGHTvsNEVER | COMBINED | 64,648 | EAS | 6:101416978 | rs9498580 | *GRIK2* | T | 0.2400 | 0.80 | 2.1E-08 | -1.04 | 5.0E-07 | 4.7E-08 | g_up_tr_i |
| 7q31.33* | PP | HEAVYvsNEVER | COMBINED | 101,759 | EAS | 7:126634131 | rs146516486 | *GRM8** | T | 0.9900 | 1.00 | 2.0E-04 | -3.29 | 8.5E-09 | 2.1E-08 | g_dw_tr_i |
| 7q36.1 | DBP | LIGHTvsNEVER | MALE | 325,958 | CPMA | 7:148621485 | rs10952768 | *C7orf33* | T | 0.7100 | -0.46 | 9.8E-09 | 0.38 | 1.9E-08 | 1.9E-08 |  |
| 15q22.2* | SBP | HEAVYvsLIGHT | MALE | 106,137 | CPMA | 15:60191621 | rs336527 | *LOC105370839* | A | 0.9900 | -0.87 | 0.12 | 8.92 | 4.0E-09 | 3.3E-08 | g_up_tr_i |
| 15q22.2 | PP | LIGHTvsNEVER | MALE | 11,638 | AFR | 15:60212158 | rs150049407 | *LOC105370839* | A | 0.9800 | -7.50 | 6.1E-09 | 7.87 | 1.6E-05 | 4.0E-08 | i_g_up_tr |
| 21q21.1 | PP | LIGHTvsNEVER | MALE | 19,225 | AFR | 21:19544123 | rs76480984 | *LOC124905048* | T | 0.9100 | 2.90 | 1.5E-08 | -2.20 | 4.6E-04 | 2.4E-08 |  |
| ***Known BP loci with 2df joint meta-analysis BP loci and GxAlc interaction*** | | | | | | | | | | | | | | | |  |
| 2q24.3* | DBP | HEAVYvsNEVER | FEMALE | 64,036 | EAS | 2:164119906 | rs13009997 | *FIGN* | T | 0.3864 | -0.33 | 2.8E-06 | -0.91 | 3.3E-04 | 2.7E-09 |  |
| 2q24.3 | SBP | CURDRINK | COMBINED | 840,896 | EUR | 2:164875154 | rs34357955 | *COBLL1* | A | 0.3916 | -0.08 | 0.18 | 0.31 | 3.3E-05 | 2.9E-09 |  |
| 2q32.1 | DBP | CURDRINK | MALE | 89,760 | EAS | 2:182401485 | rs34889222 | *PDE1A* | A | 0.5603 | -0.02 | 0.85 | -0.41 | 4.2E-04 | 4.1E-08 | i_g_up_tr |
| 3p24.1 | SBP | CURDRINK | COMBINED | 99,554 | EAS | 3:27345972 | rs2370957 | *NEK10* | C | 0.1474 | 1.16 | 3.3E-10 | -0.88 | 6.4E-04 | 6.6E-09 | i_g_up_tr |
| 4q32.3 | SBP | LIGHTvsNEVER | COMBINED | 129,511 | EAS | 4:168764661 | rs12499664 | *PALLD* | T | 0.4079 | 0.12 | 0.17 | 0.61 | 7.3E-05 | 4.9E-08 | g_up_tr_i |
| 5q14.1* | PP | LIGHTvsNEVER | MALE | 12,392 | AFR | 5:80604190 | rs138533866 | *DHFR* | A | 0.0130 | 10.30 | 4.5E-09 | -11.0 | 3.6E-08 | 2.7E-08 |  |
| 5q14.3 | DBP | HEAVYvsLIGHT | COMBINED | 717,323 | CPMA | 5:88544870 | rs992623 | *LINC00461* | A | 0.1666 | -0.18 | 1.2E-09 | 0.23 | 5.1E-05 | 9.3E-09 | g_dw_tr_i |
| 5q31.1 | DBP | HEAVYvsLIGHT | COMBINED | 631,962 | EUR | 5:132490630 | rs10900809 | *IRF1* | A | 0.3688 | -0.19 | 3.9E-16 | 0.18 | 6.7E-05 | 3.0E-13 | 5' UTR n.c_tr |
| 6q27 | DBP | HEAVYvsNEVER | COMBINED | 356,373 | CPMA | 6:165764225 | rs6941064 | *PDE10A* | T | 0.8941 | 0.09 | 0.13 | 0.49 | 4.6E-05 | 4.7E-11 | i_g_up_tr |
| 7q11.23 | SBP | CURDRINK | COMBINED | 37,779 | HIS | 7:73530040 | rs66579735 | *BAZ1B/ BCL7B* | T | 0.3700 | -0.39 | 0.011 | 1.45 | 5.3E-08 | 4.6E-08 |  |
| 8p23.1 | SBP | HEAVYvsLIGHT | MALE | 324,870 | EUR | 8:9568812 | rs36100282 | *TNKS* | CT | 0.2416 | 0.13 | 0.055 | 0.48 | 7.0E-05 | 3.6E-08 | intron |
| 8p23.1 | DBP | HEAVYvsLIGHT | COMBINED | 751,317 | CPMA | 8:9794748 | rs7836375 | *TNKS* | A | 0.6143 | -0.08 | 5.8E-04 | -0.18 | 1.0E-05 | 6.9E-15 |  |
| 8q11.21 | PP | HEAVYvsLIGHT | COMBINED | 326,989 | CPMA | 8:51295062 | rs28890775 | *PXDNL* | T | 0.0030 | 0.22 | 0.52 | 3.89 | 2.3E-07 | 2.8E-08 |  |
| 8q24.3 | SBP | CURDRINK | COMBINED | 75,290 | EAS | 8:142915507 | rs28394055 | *CYP11B2* | T | 0.3191 | -0.79 | 9.3E-12 | 0.70 | 2.5E-04 | 4.2E-10 | intron |
| 9p22.1 | DBP | CURDRINK | COMBINED | 69,501 | AFR | 9:19181239 | rs3004308 | *PLIN2* | T | 0.2252 | 0.54 | 2.1E-07 | -0.80 | 2.8E-07 | 1.8E-08 |  |
| 9q33.3 | PP | LIGHTvsNEVER | COMBINED | 464,733 | CPMA | 9:125914346 | rs72752651 | *PBX3* | T | 0.9134 | 0.73 | 7.3E-08 | -0.68 | 1.8E-05 | 4.6E-08 | intron |
| 11p15.4 | DBP | CURDRINK | MALE | 615,023 | CPMA | 11:9833610 | rs7948810 | *SBF2* | T | 0.7785 | -0.06 | 0.23 | 0.25 | 3.5E-05 | 4.4E-08 | i_g_dw_tr |
| 12q24.12* | SBP | CURDRINK | MALE | 85,208 | EAS | 12:111144803 | rs76892715 | *CUX2* | T | 0.1200 | -1.10 | 1.0E-07 | -2.38 | 2.9E-13 | 6.9E-48 | intron |
| 14q13.2 | PP | LIGHTvsNEVER | MALE | 329,976 | CPMA | 14:35401887 | rs696 | *NFKBIA* | T | 0.3777 | -0.23 | 0.004 | 0.40 | 2.3E-05 | 4.6E-08 | 3' UTR |
| 14q23.3 | PP | HEAVYvsLIGHT | COMBINED | 688,950 | CPMA | 14:67157866 | rs10139792 | *GPHN* | T | 0.1000 | 0.27 | 1.4E-08 | -0.41 | 5.7E-06 | 2.6E-08 | intron |
| 15q26.1 | DBP | CURDRINK | MALE | 641,158 | CPMA | 15:90884642 | rs35346340 | *FES* | C | 0.2874 | 0.07 | 0.092 | 0.24 | 9.1E-06 | 5.3E-34 | up_tr_g_up  _tr_i |
| 16q12.2 | SBP | HEAVYvsLIGHT | COMBINED | 351,969 | CPMA | 16:53765557 | rs1395690189 | *FTO* | CA | 0.4385 | 0.38 | 1.9E-09 | -0.40 | 3.4E-05 | 1.5E-08 | intron |
| 17q21.31 | PP | CURDRINK | COMBINED | 912,977 | CPMA | 17:46789595 | na | *WNT3* | CT | 0.6482 | -0.01 | 0.78 | 0.21 | 5.0E-05 | 2.1E-10 | i_g_dw_tr |
| 20q13.13 | DBP | CURDRINK | COMBINED | 755,280 | EUR | 20:48730238 | rs11480108 | *PREX1* | A | 0.7298 | -0.02 | 0.54 | 0.21 | 3.7E-05 | 3.9E-10 | i_g_up_tr |

Note: Significant 2df joint main and interaction meta-analyses (PGxAlc<5E-08 and PFDR<5%) and GxAlc interactions on BP (PGxAlc<0.05/Meff, where Meff is the number of significant 2df loci in the respective population). Independent loci were defined by distance>500kb or r2<0.1 between variants. * indicates the locus was also identified for GxAlc interaction in Table 1. Group: populations from AFR, African; EAS, East Asian; EUR, European; HIS, Hispanic/Latino; and CPMA, cross-population meta-analysis. Chr:Position, chromosome:position (hg38). EA, effect allele. EAF, effect allele frequency. Function, Functional consequence of variants: dw, downstream; g, genic; i, intron; n.c, non-coding; tr, transcript; up, upstream; 3' UTR, 3_prime_untranslated region; 5' UTR, 5_prime_untranslated region.
