# Supplementary material for: Discovery of gene-alcohol interaction loci influencing blood pressure in 1.1 million individuals from multiple populations
Source: Research Square preprint supplement (doi:10.21203/rs.3.rs-9283196/v1), 2026-04-03
Supplement: Supplementary file 7 [file 5e4df588a66a29b1a5287e2b.xlsx]

## Sheet: ST12. GPS
Supplementary Table 12. Potential genes involved in GxAlc interactions for BP from biological insights and druggability
Lead Variant	Chr:Position (hg38)	GxAlc	Novel	Locus	Trait	Alcoholic Class	Sex Class	Group	Nearest Gene	Biological alcohol- and/or BP-related Genes	Druggability Genes	Functional	Regulatory	Pathway	Prioritized	Score
rs36100282	8:9568812	sugg	no	8p23.1***	SBP	HEAVYvsLIGHT	MALE	EUR	TNKS	TNKS, PPP1R3B-DT, MIR124-1HG, MSRA-DT		TNKS	MFHAS1, ERI1, PPP1R3B, TNKS, PRSS55	TNKS	TNKS	5
rs7836375	8:9794748	sugg	no	8p23.1***	DBP	HEAVYvsLIGHT	COMBINED	CPMA	TNKS / LOC124902057	TNKS, PPP1R3B-DT, MIR124-1HG, MSRA-DT		TNKS	MFHAS1, ERI1, PPP1R3B, TNKS, PRSS55	TNKS	TNKS	5
rs1229984	4:99318162	signif	no	4q23	SBP	CURDRINK	COMBINED	CPMA	ADH1B	ADH1B, ADH1A, ADH1C, ADH4, ADH5, ADH6, ADH7, BTF3P13, EIF4E, FAM177A1P1, NDUFS5P4, METAP1, PCNAP1, C4orf17, MTTP, RNU7-149P	ADH1A	ADH1B		ADH4, ADH6, ADH1B	ADH1B	4
rs34357955	2:164875154	sugg	no	2q24.3	SBP	CURDRINK	COMBINED	EUR	COBLL1 / SLC38A11	COBLL1, GRB14, Scn2a, Scn3a			COBLL1, SLC38A11	COBLL1	COBLL1	4
rs11066001	12:111681367	signif	no	12q24.11-q24.13**	SBP	CURDRINK	COMBINED	EAS	BRAP-ACAD10	ALDH2, HECTD4, BRAP, CUX2, LINC02356,		ALDH2	FAM216A	ALDH2	ALDH2	3
rs8015900	14:72821222	signif	no	14q24.2	PP	CURDRINK	COMBINED	EUR	DPF3	DPF3, PSEN1, RGS6			DPF3, DCAF4		DPF3	3
rs956006	15:62516340	signif	no	15q22.2	PP	HEAVYvsNEVER	COMBINED	EUR	TLN2				TLN2	TLN2	TLN2	3
rs113808516	5:80645829	signif	no	5q14.1	PP	LIGHTvsNEVER	MALE	AFR	DHFR	DHFR, ANKRD34B, RASGRF2	RASGRF2			DHFR	DHFR	3
rs10139792	14:67157866	sugg	no	14q23.3	PP	HEAVYvsLIGHT	COMBINED	CPMA	GPHN	GARIN2			CTD-2014B16.3, GPHN, FAM71D, MPP5, ATP6V1D, EIF2S1, PLEK2, TMEM229B	GPHN	GPHN	3
rs6941064	6:165764225	sugg	no	6q27	DBP	HEAVYvsNEVER	COMBINED	CPMA	PDE10A	PDE10A, C6orf118	PDE10A				PDE10A	3
rs66579735	7:73530040	sugg	no	7q11.23	SBP	CURDRINK	COMBINED	HIS	BAZ1B-BCL7B	BCL7B, MLXIPL, CLDN3			POM121, BCL7B, TBL2, MLXIPL		BCL7B	3
rs28394055	8:142915507	sugg	no	8q24.3	SBP	CURDRINK	COMBINED	EAS	CYP11B2	CYP11B2, GPIHBP1/ZFP41				CYP11B2	CYP11B2	3
rs10900809	5:132490630	sugg	no	5q31.1	DBP	HEAVYvsLIGHT	COMBINED	EUR	IRF1	IRF1, SLC22A4, SLC22A5, IL-13, IL-4, LEAP2, P4HA2, UQCRQ, AFF4		SLC22A4	ACSL6, P4HA2, PDLIM4, SLC22A4, SLC22A5, C5orf56, IL13, KIF3A, SHROOM1	ACSL6, PDLIM4, KIF3A	SLC22A4	3
rs578068419	2:45054724	signif	yes	2p21	PP	HEAVYvsNEVER	COMBINED	EUR	SIX2	SIX2, SIX3, CAMKMT, LINC01833	SIX2, SRBD1				SIX2	3
rs140219321	7:126565394	signif	yes	7q31.33 *	PP	HEAVYvsNEVER	COMBINED	EAS	GRM8	GRM8	GRM8				GRM8	3
rs9498580	6:101416978	sugg	yes	6q16.3	PP	LIGHTvsNEVER	COMBINED	EAS	GRIK2	GRIK2	GRIK2				GRIK2	3
rs150916804	10:20502180	signif	no	10p12.31	SBP	LIGHTvsNEVER	COMBINED	CPMA	PLXDC2 / MIR4675	PLXDC2					PLXDC2	2
rs562453676	1:64708479	signif	no	1p31.3	PP	HEAVYvsLIGHT	COMBINED	EUR	CACHD1 / RAVER2	CACHD1					CACHD1	2
rs12028312	1:20647448	signif	no	1p36.12	PP	HEAVYvsLIGHT	MALE	EAS	PINK1, PINK1-AS	PINK1, CAMK2N1, VWA5B1					PINK1	2
rs79684633	1:171959446	signif	no	1q24.3	PP	CURDRINK	COMBINED	HIS	DNM3	DNM3					DNM3	2
rs11117785	1:217179072	signif	no	1q41	SBP	CURDRINK	FEMALE	AFR	ESRRG / LOC105372920	ESRRG					ESRRG	2
rs79563921	2:163895894	signif	no	2q24.3 *	PP	HEAVYvsNEVER	COMBINED	EUR	FIGN / GRB14	FIGN					FIGN	2
rs3774602	3:53789071	signif	no	3p21.1	SBP	CURDRINK	COMBINED	EAS	CACNA1D	CACNA1D, CHDH, IL17RB, CABYRP1, CACNA2D3	IL17RB				CACNA1D, IL17RB	2
rs12341695	9:133232115	signif	no	9q34.13-q34.2	SBP	LIGHTvsNEVER	FEMALE	HIS	OBP2B / LOC124902294	ABO, DBH, ADAMTS13, TSC1, CEL, FAM163B, RPL7A, GFI1B,	DBH				DBH	2
rs696	14:35401887	sugg	no	14q13.2	PP	LIGHTvsNEVER	MALE	CPMA	NFKBIA	NFKBIA					NFKBIA	2
rs35346340	15:90884642	sugg	no	15q26.1	DBP	CURDRINK	MALE	CPMA	FES	FURIN, MAN2A2, SV2B			FURIN, FES, MAN2A2, RCCD1		FES, FURIN, MAN2A2	2
na	16:53765557	sugg	no	16q12.2	SBP	HEAVYvsLIGHT	COMBINED	CPMA	FTO	FTO,					FTO	2
na	17:46789595	sugg	no	17q21.31-q21.32	PP	CURDRINK	COMBINED	CPMA	WNT3, LRRC37A2	WNT3, LRRC37A2, LRRC37A, ARL17B, KANSL1, MAPT, NSF,					WNT3	2
rs34889222	2:182401485	sugg	no	2q32.1	DBP	CURDRINK	MALE	EAS	PDE1A	DNAJC10, PPP1R1C	DNAJC10		PDE1A		PDE1A, DNAJC10	2
rs2370957	3:27345972	sugg	no	3p24.1	SBP	CURDRINK	COMBINED	EAS	NEK10	EOMES, SLC4A7	EOMES				EOMES	2
rs992623	5:88544870	sugg	no	5q14.3	DBP	HEAVYvsLIGHT	COMBINED	CPMA	LINC00461	TMEM161B, LINC02488, MIR9-2HG, MEF2C			TMEM161B		TMEM161B	2
rs3004308	9:19181239	sugg	no	9p22.1	DBP	CURDRINK	COMBINED	AFR	PLIN2-DENND4C	PLIN2, RRAGA			DENND4C		PLIN2, DENND4C	2
rs72752651	9:125914346	sugg	no	9q33.3	PP	LIGHTvsNEVER	COMBINED	CPMA	PBX3	PBX3, MAPKAP1					PBX3	2
rs336527	15:60191621	signif	yes	15q22.2 *	SBP	HEAVYvsLIGHT	MALE	CPMA	LOC105370839	ANXA2, RORA, FOXO1	ANXA2, FOXB1				ANXA2	2
rs10952768	7:148621485	sugg	yes	7q35-q36.1	DBP	LIGHTvsNEVER	MALE	CPMA	C7orf33	CUL1, CNTNAP2, EZH2	C7orf33, CUL1				C7orf33, CUL1	2
rs10774610	12:110902439	signif	no	12q24.11-q24.13**	DBP	CURDRINK	COMBINED	EAS	CCDC63	CCDC63, PPP1CC, RPL29P25, MYL2, VHRT,
rs4766660	12:112838931	signif	no	12q24.11-q24.13**	SBP	HEAVYvsLIGHT	MALE	EAS	RPH3A/OAS2	OAS1, OAS3, PTPN11, LINC01405
rs2525858		signif	no	12q24.11-q24.13**
rs4492609	1:40133103	signif	no	1p34.2	DBP	LIGHTvsNEVER	MALE	HIS	PPT1 / RLF	RIMS3, CAP1
rs137958729	4:62940142	signif	no	4q13.1	PP	HEAVYvsNEVER	COMBINED	CPMA	ADGRL3 / LOC105377253
rs12509595	4:80261400	signif	no	4q21.21	SBP	HEAVYvsNEVER	FEMALE	CPMA	LOC124900725 / FGF5
rs6471542	8:95543831	signif	no	8q22.1	PP	LIGHTvsNEVER	FEMALE	HIS	C8orf37-AS1	NDUFAF6
rs7948810	11:9833610	sugg	no	11p15.4	DBP	CURDRINK	MALE	CPMA	SBF2
rs11480108	20:48730238	sugg	no	20q13.13	DBP	CURDRINK	COMBINED	EUR	PREX1				PREX1		PREX1
rs12499664	4:168764661	sugg	no	4q32.3	SBP	LIGHTvsNEVER	COMBINED	EAS	PALLD	DDX60, DDX60L
rs28890775	8:51295062	sugg	no	8q11.21	PP	HEAVYvsLIGHT	COMBINED	CPMA	PXDNL
rs76480984	21:19544123	sugg	yes	21q21.1	PP	LIGHTvsNEVER	MALE	AFR	LOC124905048 / LINC01683
