# Supplementary material for: Discovery of gene-alcohol interaction loci influencing blood pressure in 1.1 million individuals from multiple populations
Source: Research Square preprint supplement (doi:10.21203/rs.3.rs-9283196/v1), 2026-04-03
Supplement: Supplementary file 8 [file 5ead386578c961b3ddee91bc.xlsx]

## Sheet: ST7. drug-gen
Supplementary Table 7. Top candidate drug-gene interactions for protein-coding targets at BP interacting loci
Ensembl	gene_symbol	chr	start	end	type	variant	Priority	Protein_ID	UniProt_ID	GO_processes	KEGG_Reactome_pathways	IDG_Target_Level	Target_categories	DGIdb_interactions	Top_drug_name	Top_approved_drug_name	Top_drug_indication	Top_ChEMBL_ID	Top_interaction_score	Total_active_ligands	Total_approved_drugs
ENSG00000187758	ADH1A	4	100197524	100212185	protein_coding	rs1229984	1	ADH1A	P07327	drug metabolic process; ethanol oxidation; alcohol metabolic process	Retinol metabolism; Glycolysis / Gluconeogenesis; Fatty acid degradation; Metabolic pathways; Metabolism of xenobiotics by cytochrome P450	Tclin	DRUGGABLE GENOME	16	FOMEPIZOLE	FOMEPIZOLE	for treatment of ethanol intolerance	CHEMBL1308	3.26274	5	1
ENSG00000111275	ALDH2	12	112204691	112247782	protein_coding	rs11066001; rs11066280	1	ALDH2	P05091	alcohol metabolic process; carbohydrate metabolic process; ethanol oxidation; ethanol catabolic process	Tryptophan metabolism; Histidine metabolism; Pyruvate metabolism; Arginine and proline metabolism; Glycolysis / Gluconeogenesis	Tclin	CLINICALLY ACTIONABLE, DRUGGABLE GENOME, ENZYME	46	ABT-670				1.13487	97	2
ENSG00000182718	ANXA2	15	60639333	60695082	protein_coding	rs336527	1	ANXA2	P07355	negative regulation of low-density lipoprotein particle receptor catabolic process; osteoclast development; positive regulation of low-density lipoprotein particle clearance; positive regulation of low-density lipoprotein particle receptor binding; positive regulation of receptor recycling	Cytokine Signaling in Immune system; Dissolution of Fibrin Clot; Gene and protein expression by JAK-STAT signaling after Interleukin-12 stimulation; Hemostasis; Immune System	Tbio	CELL SURFACE, DRUGGABLE GENOME	14	SHA 68R			CHEMBL1765704	3.72884
ENSG00000170279	C7orf33	7	148287657	148312952	protein_coding	rs10952768	1	C7orf33	Q8WU49	NA	NA	Tdark	NA
ENSG00000055130	CUL1	7	148395006	148498128	protein_coding	rs10952768	1	CUL1	Q13616	protein ubiquitination; SCF-dependent proteasomal ubiquitin-dependent protein catabolic process; ubiquitin-dependent protein catabolic process; cell cycle arrest; cellular iron ion homeostasis	Circadian rhythm; TGF-beta signaling pathway; Cell cycle; Oocyte meiosis; Ubiquitin mediated proteolysis	Tbio	ENZYME
ENSG00000123454	DBH	9	136501482	136524466	protein_coding	rs78433526	3	DBH	Q5T382	dopamine catabolic process; norepinephrine biosynthetic process; octopamine biosynthetic process; positive regulation of cold-induced thermogenesis; catecholamine biosynthetic process	Metabolic pathways; Tyrosine metabolism	Tchem	DRUGGABLE GENOME, ENZYME	15	ETAMICASTAT	NALTREXONE		CHEMBL19019	3.48025	3
ENSG00000077232	DNAJC10	2	183580999	183659191	protein_coding	rs34889222	1	DNAJC10	Q8IXB1	intrinsic apoptotic signaling pathway in response to endoplasmic reticulum stress; negative regulation of protein phosphorylation; protein folding in endoplasmic reticulum; response to endoplasmic reticulum stress; ubiquitin-dependent ERAD pathway	Protein processing in endoplasmic reticulum	Tbio	DRUGGABLE GENOME
ENSG00000163508	EOMES	3	27757440	27764206	protein_coding	rs2370957	1	EOMES	O95936	positive regulation of transcription by RNA polymerase II; brain development; CD8-positive, alpha-beta T cell differentiation involved in immune response; cell differentiation involved in embryonic placenta development; endoderm formation	Developmental Biology; POU5F1 (OCT4), SOX2, NANOG repress genes related to differentiation; Transcriptional regulation of pluripotent stem cells	Tbio	TRANSCRIPTION FACTOR	1	GLATIRAMER	GLATIRAMER		CHEMBL1201507	14.9154
ENSG00000171956	FOXB1	15	60296421	60353929	protein_coding	rs336527	1	FOXB1	Q99853	anatomical structure morphogenesis; cell differentiation; regulation of transcription by RNA polymerase II; axon target recognition; cell migration in diencephalon	NA	Tbio	NA
ENSG00000164418	GRIK2	6	101846664	102517958	protein_coding	rs9498580	1	GRIK2	Q13002	modulation of chemical synaptic transmission; positive regulation of synaptic transmission	Glutamatergic synapse; Neuroactive ligand-receptor interaction; Activation of Ca-permeable Kainate Receptor	Tclin	DRUGGABLE GENOME, ION CHANNEL	23	TEZAMPANEL	HEXOBARBITAL	analgesic,antimigraine agent	CHEMBL7728	0.504385	81	3
ENSG00000179603	GRM8	7	126078652	126893348	protein_coding	rs140219321	1	GRM8	O00222	adenylate cyclase-inhibiting G protein-coupled receptor signaling pathway; adenylate cyclase-inhibiting G protein-coupled glutamate receptor signaling pathway; G protein-coupled glutamate receptor signaling pathway; regulation of synaptic transmission, glutamatergic	Glutamatergic synapse; Phospholipase D signaling pathway; Neuroactive ligand-receptor interaction	Tchem	DRUGGABLE GENOME, G PROTEIN COUPLED RECEPTOR	15	AZ12216052	GLUTAMIC ACID		CHEMBL575060	3.48025	18	2
ENSG00000056736	IL17RB	3	53880607	53899827	protein_coding	rs3774602	1	IL17RB	Q9NRM6	defense response; interleukin-17-mediated signaling pathway; regulation of cell growth; positive regulation of inflammatory response	Cytokine Signaling in Immune system; Immune System; Interleukin-17 signaling	Tbio	DRUGGABLE GENOME
ENSG00000112541	PDE10A	6	165740776	166400091	protein_coding	rs6941064	1	PDE10A	Q9Y233	negative regulation of cGMP-mediated signaling; G protein-coupled receptor signaling pathway; cAMP catabolic process; cGMP catabolic process	cAMP signaling pathway; Metabolic pathways; Purine metabolism; Morphine addiction	Tclin	NA							4152	2
ENSG00000113319	RASGRF2	5	80256491	80525975	protein_coding	rs113808516	1	RASGRF2	O14827	response to endoplasmic reticulum stress; G protein-coupled receptor signaling pathway; MAPK cascade; positive regulation of apoptotic process; regulation of small GTPase mediated signal transduction	Ras signaling pathway; MAPK signaling pathway; Activation of NMDA receptors and postsynaptic events; CREB1 phosphorylation through NMDA receptor-mediated activation of RAS signaling	Tbio	KINASE
ENSG00000170577	SIX2	2	45232300	45236569	protein_coding	rs72877666*	1	SIX2	Q9NPC8	cell migration; cell proliferation; kidney development; anatomical structure development; negative regulation of transcription, DNA-templated	NA	Tbio	TRANSCRIPTION FACTOR, TRANSCRIPTION FACTOR COMPLEX
ENSG00000068784	SRBD1	2	45615819	45839304	protein_coding	rs72877666*	1	SRBD1	Q8N5C6	mRNA binding; structural constituent of ribosome	NA	Tbio
Notes: Used DGIdb, Pharos, DrugBank and ChEMBL databases. Target genes with approved drugs are highlighted in grey.
