# Supplementary material for: Discovery of gene-alcohol interaction loci influencing blood pressure in 1.1 million individuals from multiple populations
Source: Research Square preprint supplement (doi:10.21203/rs.3.rs-9283196/v1), 2026-04-03
Supplement: Supplementary file 9 [file 6fa11656e0a58abda4797afc.xlsx]

## Sheet: ST10. GTEx
Supplementary Table 10. Regulatory annotation of 46 GxAlc interaction loci. Shown are GTEx eQTLs that were identified by FUMA SNP2GENE (tissues brain, heart, arteries, liver, kidney, adrenal gland)
ensg	symbol	chr	start	end	strand	type	entrezID	HUGO	eqtlMapSNPs	eqtlMapminP	eqtlMapminQ	eqtlMapts	eqtlDirection	minGwasP	IndSigSNPs	GenomicLocus
ENSG00000082438	COBLL1	2	165510134	165700189	-1	protein_coding	22837	COBLL1	16	1.2194e-07	8.29718e-05	GTEx/v8/Artery_Aorta:GTEx/v8/Brain_Cerebellum:GTEx/v8/Brain_Cortex	NA	2.9e-09	rs34357955	4
ENSG00000169507	SLC38A11	2	165752696	165812035	-1	protein_coding	151258	SLC38A11	6	7.51483e-06	3.63014e-36	GTEx/v8/Artery_Tibial	NA	NA	rs34357955	4
ENSG00000115252	PDE1A	2	183004763	183387919	-1	protein_coding	5136	PDE1A	5	6.64746e-09	2.91318e-30	GTEx/v8/Brain_Caudate_basal_ganglia:GTEx/v8/Brain_Cortex:GTEx/v8/Brain_Hypothalamus:GTEx/v8/Brain_Nucleus_accumbens_basal_ganglia:GTEx/v8/Brain_Putamen_basal_ganglia:GTEx/v8/Brain_Substantia_nigra	NA	4.1e-08	rs34889222	5
ENSG00000164180	TMEM161B	5	87485450	87565293	-1	protein_coding	153396	TMEM161B	6	1.69399e-07	0.000187315	GTEx/v8/Artery_Tibial	NA	9.3e-09	rs992623	10
ENSG00000164398	ACSL6	5	131142683	131347936	-1	protein_coding	23305	ACSL6	22	4.26384e-05	1.80614e-09	GTEx/v8/Whole_Blood	NA	3e-13	rs10900809	11
ENSG00000072682	P4HA2	5	131527531	131631008	-1	protein_coding	101927705	P4HA2	34	5.34287e-29	2.11549e-31	GTEx/v8/Artery_Aorta:GTEx/v8/Artery_Tibial:GTEx/v8/Brain_Cerebellar_Hemisphere:GTEx/v8/Brain_Cerebellum:GTEx/v8/Brain_Putamen_basal_ganglia	NA	3e-13	rs10900809	11
ENSG00000131435	PDLIM4	5	131593364	131609147	1	protein_coding	8572	PDLIM4	34	6.19854e-16	6.02052e-16	GTEx/v8/Brain_Cortex:GTEx/v8/Brain_Frontal_Cortex_BA9:GTEx/v8/Heart_Left_Ventricle	NA	3e-13	rs10900809	11
ENSG00000197208	SLC22A4	5	131630136	131679899	1	protein_coding	6583	SLC22A4	34	1.20702e-07	6.7175e-07	GTEx/v8/Whole_Blood:GTEx/v8/Artery_Aorta	NA	3e-13	rs10900809	11
ENSG00000197375	SLC22A5	5	131705444	131731306	1	protein_coding	6584	SLC22A5	34	6.26908e-30	9.62153e-31	GTEx/v8/Cells_EBV-transformed_lymphocytes:GTEx/v8/Whole_Blood:GTEx/v8/Artery_Tibial:GTEx/v8/Brain_Nucleus_accumbens_basal_ganglia	NA	3e-13	rs10900809	11
ENSG00000197536	C5orf56	5	131746328	131811736	1	protein_coding	NA	C5orf56	34	9.72465e-13	3.3657e-48	GTEx/v8/Whole_Blood:GTEx/v8/Artery_Aorta:GTEx/v8/Artery_Tibial:GTEx/v8/Brain_Caudate_basal_ganglia:GTEx/v8/Brain_Cerebellar_Hemisphere:GTEx/v8/Brain_Cerebellum:GTEx/v8/Brain_Cortex:GTEx/v8/Brain_Frontal_Cortex_BA9:GTEx/v8/Brain_Hippocampus:GTEx/v8/Brain_Nucleus_accumbens_basal_ganglia:GTEx/v8/Heart_Atrial_Appendage	NA	3e-13	rs10900809	11
ENSG00000169194	IL13	5	131991955	131996802	1	protein_coding	3596	IL13	3	2.09225e-05	0.0120585	GTEx/v8/Brain_Nucleus_accumbens_basal_ganglia	NA	NA	rs10900809	11
ENSG00000131437	KIF3A	5	132028320	132073330	-1	protein_coding	11127	KIF3A	6	8.76356e-06	1.44548e-23	GTEx/v8/Artery_Tibial	NA	NA	rs10900809	11
ENSG00000164403	SHROOM1	5	132157833	132166590	-1	protein_coding	134549	SHROOM1	23	2.81019e-05	1.05181e-61	GTEx/v8/Whole_Blood	NA	3e-13	rs10900809	11
ENSG00000196313	POM121	7	72349936	72421979	1	protein_coding	9883	POM121	1	0.000339784	2.69936e-59	GTEx/v8/Artery_Tibial	NA	NA	rs66579735	14
ENSG00000106635	BCL7B	7	72950686	72972332	-1	protein_coding	9275	BCL7B	2	6.46068e-05	1.78952e-08	GTEx/v8/Artery_Aorta	NA	4.6e-08	rs66579735	14
ENSG00000106638	TBL2	7	72983262	72993121	-1	protein_coding	26608	TBL2	1	0.000176412	4.93874e-46	GTEx/v8/Artery_Tibial	NA	NA	rs66579735	14
ENSG00000009950	MLXIPL	7	73007524	73038873	-1	protein_coding	51085	MLXIPL	2	3.72205e-05	1.28327e-05	GTEx/v8/Brain_Cerebellum	NA	NA	rs66579735	14
ENSG00000147324	MFHAS1	8	8640864	8751155	-1	protein_coding	9258	MFHAS1	121	6.53627e-07	2.21586e-22	GTEx/v8/Heart_Atrial_Appendage	NA	6.9e-15	rs36100282;rs7836375	17
ENSG00000104626	ERI1	8	8859657	8974256	1	protein_coding	90459	ERI1	3	7.36982e-05	1.58151e-06	GTEx/v8/Artery_Aorta	NA	NA	rs7836375	17
ENSG00000173281	PPP1R3B	8	8993765	9009084	-1	protein_coding	79660	PPP1R3B	63	6.48718e-07	2.14339e-08	GTEx/v8/Artery_Tibial	NA	6.9e-15	rs7836375	17
ENSG00000173273	TNKS	8	9413424	9639856	1	protein_coding	8658	TNKS	145	1.60779e-09	5.54363e-07	GTEx/v8/Brain_Putamen_basal_ganglia:GTEx/v8/Brain_Spinal_cord_cervical_c-1	NA	3.6e-08	rs36100282;rs7836375	17
ENSG00000184647	PRSS55	8	10383056	10411676	1	protein_coding	203074	PRSS55	1	7.87811e-05	2.50111e-21	GTEx/v8/Brain_Cerebellar_Hemisphere	NA	NA	rs7836375	17
ENSG00000137145	DENND4C	9	19230433	19374139	1	protein_coding	55667	DENND4C	15	7.83468e-19	7.12976e-14	GTEx/v8/Artery_Aorta:GTEx/v8/Heart_Atrial_Appendage	NA	1.8e-08	rs3004308	20
ENSG00000204856	FAM216A	12	110906169	110928190	1	protein_coding	29902	FAM216A	21	3.12447e-05	8.14721e-05	GTEx/v8/Artery_Aorta	NA	5.2e-09	rs10774610	25
ENSG00000258847	CTD-2014B16.3	14	66424015	66471241	-1	protein_coding	NA	NA	1	6.07614e-05	0.0442912	GTEx/v8/Brain_Putamen_basal_ganglia	NA	NA	rs10139792	27
ENSG00000171723	GPHN	14	66974125	67648520	1	protein_coding	10243	GPHN	2	5.36601e-05	1.62906e-06	GTEx/v8/Heart_Left_Ventricle	NA	2.6e-08	rs10139792	27
ENSG00000172717	FAM71D	14	67656110	67695267	1	protein_coding	161142	FAM71D	148	1.02067e-05	0.0049927	GTEx/v8/Brain_Cerebellum	NA	NA	rs10139792	27
ENSG00000072415	MPP5	14	67707826	67802536	1	protein_coding	64398	MPP5	131	1.0661e-06	0.00042912	GTEx/v8/Artery_Tibial	NA	NA	rs10139792	27
ENSG00000100554	ATP6V1D	14	67761088	67826982	-1	protein_coding	51382	ATP6V1D	993	7.1751e-21	1.54127e-18	GTEx/v8/Adrenal_Gland:GTEx/v8/Whole_Blood:GTEx/v8/Artery_Aorta:GTEx/v8/Artery_Coronary:GTEx/v8/Artery_Tibial:GTEx/v8/Brain_Caudate_basal_ganglia:GTEx/v8/Brain_Cortex:GTEx/v8/Heart_Atrial_Appendage:GTEx/v8/Heart_Left_Ventricle:GTEx/v8/Kidney_Cortex:GTEx/v8/Liver	NA	2.6e-08	rs10139792	27
ENSG00000134001	EIF2S1	14	67826714	67853233	1	protein_coding	1965	EIF2S1	993	2.65427e-22	1.69014e-17	GTEx/v8/Artery_Aorta:GTEx/v8/Artery_Coronary:GTEx/v8/Artery_Tibial:GTEx/v8/Heart_Atrial_Appendage	NA	2.6e-08	rs10139792	27
ENSG00000100558	PLEK2	14	67853700	67878917	-1	protein_coding	26499	PLEK2	911	3.33032e-20	4.09729e-16	GTEx/v8/Heart_Atrial_Appendage:GTEx/v8/Heart_Left_Ventricle:GTEx/v8/Liver	NA	2.6e-08	rs10139792	27
ENSG00000198133	TMEM229B	14	67913801	68000456	-1	protein_coding	161145	TMEM229B	579	1.20141e-06	5.88154e-14	GTEx/v8/Heart_Atrial_Appendage	NA	NA	rs10139792	27
ENSG00000205683	DPF3	14	73086004	73360809	-1	protein_coding	8110	DPF3	6	1.99167e-26	3.26016e-28	GTEx/v8/Artery_Aorta:GTEx/v8/Artery_Tibial	NA	1.6e-06	rs8015900	28
ENSG00000119599	DCAF4	14	73393040	73426411	1	protein_coding	26094	DCAF4	6	1.77792e-12	9.3705e-30	GTEx/v8/Whole_Blood:GTEx/v8/Artery_Aorta:GTEx/v8/Artery_Tibial:GTEx/v8/Brain_Cerebellar_Hemisphere:GTEx/v8/Brain_Cerebellum:GTEx/v8/Heart_Atrial_Appendage	NA	1.6e-06	rs8015900	28
ENSG00000171914	TLN2	15	62682725	63136830	1	protein_coding	83660	TLN2	3	3.55219e-25	1.06611e-19	GTEx/v8/Artery_Aorta:GTEx/v8/Artery_Tibial	NA	1.2e-06	rs956006	30
ENSG00000140564	FURIN	15	91411822	91426688	1	protein_coding	5045	FURIN	7	4.97739e-06	8.08037e-06	GTEx/v8/Artery_Aorta:GTEx/v8/Artery_Tibial	NA	5.3e-34	rs35346340	31
ENSG00000182511	FES	15	91426925	91439006	1	protein_coding	2242	FES	15	2.63885e-16	1.42859e-12	GTEx/v8/Adrenal_Gland:GTEx/v8/Whole_Blood:GTEx/v8/Artery_Aorta:GTEx/v8/Artery_Coronary:GTEx/v8/Artery_Tibial:GTEx/v8/Heart_Atrial_Appendage	NA	5.3e-34	rs35346340	31
ENSG00000196547	MAN2A2	15	91445448	91465814	1	protein_coding	4122	MAN2A2	7	1.80698e-05	0.0244275	GTEx/v8/Artery_Aorta	NA	5.3e-34	rs35346340	31
ENSG00000166965	RCCD1	15	91498100	91506349	1	protein_coding	91433	RCCD1	1	4.42737e-05	4.32112e-22	GTEx/v8/Brain_Nucleus_accumbens_basal_ganglia	NA	NA	rs35346340	31
ENSG00000124126	PREX1	20	47240790	47444420	-1	protein_coding	57580	PREX1	9	1.08794e-26	4.01934e-25	GTEx/v8/Artery_Aorta:GTEx/v8/Artery_Tibial:GTEx/v8/Brain_Cerebellum	NA	3.9e-10	rs11480108	32
