# Supplementary material for: Discovery of gene-alcohol interaction loci influencing blood pressure in 1.1 million individuals from multiple populations
Source: Research Square preprint supplement (doi:10.21203/rs.3.rs-9283196/v1), 2026-04-03
Supplement: Supplementary file 10 [file 7078e293b796d3dcf3c0232d.xlsx]

## Sheet: ST5. Biol.func GxAlc
Supplementary Table 5. Brief description of the biological insights of novel and known loci genes for blood pressure with primary and secondary gene-alcohol interactions
Locus	Trait	Alcoholic Class	Sex Class	N	Group	Chr:Position (hg38)	Lead Variant	Nearest Gene	Biological insights
Novel GxAlc locus_Primary (Table 1)
2p21	PP	HEAVYvsNEVER	COMBINED	37103	EUR	2:45054724	rs578068419	SIX2	Locus 2p21contains genes linked to alcohol consumption. (1) Several studies have reported genes (CAMKMT, LINC01833, SIX3, and SIX2) associated with alcohol consumption and alcohol use disorders (AUD) based on GWAS studies conducted in European and multi-population groups (PMIDs: 30336701, 30940813, 32451486, 33861876, 36301540, 36477530, 37106081, 37156939, 37282553). (2) Additionally, SIX2 funct…
7q31.33	PP	HEAVYvsNEVER	COMBINED	101759	EAS	7:126565394	rs140219321	GRM8	Locus 7q31.33 contains the GRM8 gene, which is linked to alcohol consumption. (1) Multiple studies have shown associations between GRM8 and alcohol dependence (PMID: 16213472, 18618593, 25978827, 32299001). (2) GRM8 (also known as GluR8) encodes a metabotropic glutamate receptor that is involved in neurological and psychiatric conditions, including alcohol and cocaine dependence (PMID: 25978827, …
15q22.2 *	SBP	HEAVYvsLIGHT	MALE	106137	CPMA	15:60191621	rs336527	LOC105370839	Locus 15q22.2 contains genes linked to alcohol consumption. The uncharacterized lncRNA LOC105370839 gene in humans is a predicted target for the ANXA2 gene annexin. (1) ANXA2 encodes Annexin A2, a protein that plays a complex role in cellular response to oxidative stress, which is a state of imbalance between the production of harmful reactive oxygen species (ROS). Alcohol consumption can signifi…
Novel GxAlc locus_Secondary (Table 2)
6q16.3	PP	LIGHTvsNEVER	COMBINED	64648	EAS	6:101416978	rs9498580	GRIK2	Locus 6q16.3 contains the GRIK2 gene, which is linked to alcohol consumption. (1) A significant interaction was reported between GRIK2 and the hours spent watching television regarding alcohol consumption in the UK Biobank data (GRIK2-rs438990: P=3x10-9, PMID 34877740). (2) Another study suggested that GRIK2 may have an alcohol-by-allele count interaction effect (P=0.0044), wherein healthy social…
7q35-q36.1	DBP	LIGHTvsNEVER	MALE	325958	CPMA	7:148621485	rs10952768	C7orf33	Locus 7q35-q36.1 contains genes linked to alcohol consumption. (1) The CUL1 gene is involved in alcohol's effects on the body, particularly in the liver and muscle tissue. Alcohol exposure can lead to CUL1 accumulating in the nucleus of liver cells, which inhibits the process of mitophagy, leading to liver damage characteristic of AUC. Additionally, targeting the DUSP1/CUL1 pathway is a potential…
21q21.1	PP	LIGHTvsNEVER	MALE	19225	AFR	21:19544123	rs76480984	LOC124905048 / LINC01683	N.A.
Known GxAlc locus_Primary (Table 1)
1p36.12	PP	HEAVYvsLIGHT	MALE	55199	EAS	1:20647448	rs12028312	PINK1, PINK1-AS	Locus 1p36.12 contains genes linked to alcohol consumption. (1) The PINK1 gene plays a crucial role in maintaining mitochondrial health (i.e., mitophagy). Studies demonstrate that acute alcohol exposure activates the PINK1-Parkin pathway and enhances mitophagy. However, chronic alcohol consumption disrupts this protective response, leading to the accumulation of damaged mitochondria and contribut…
1p34.2	DBP	LIGHTvsNEVER	MALE	9242	HSP	1:40133103	rs4492609	PPT1 / RLF	Locus 1p34.2 contains genes linked to alcohol consumption. (1) Studies have shown that RIMS3 expression was dysregulated in brain tissue following chronic alcohol exposure as part of the widespread "rewiring" of gene expression systems, which may suggest that RIMS3 could be involved in the liver's inflammatory response to alcohol-induced damage (PMID: 32258954). (2) Animal models of different eth…
1p31.3	PP	HEAVYvsLIGHT	COMBINED	140915	EUR	1:64708479	rs562453676	CACHD1 / RAVER2	Locus 1p31.3 contains the CACHD1 gene, which is linked to alcohol consumption. (1) A study reported the dysregulation of the dendritic CACHD1 in the medial prefrontal cortex's corticotropin-releasing receptor one during ethanol withdrawal, suggesting vulnerability to the long-term effects of ethanol dependence in prelimbic neurons of male mice (PMID: 38983690).
1q24.3	PP	CURDRINK	COMBINED	24719	HIS	1:171959446	rs79684633	DNM3	Locus 1q24.3 contains genes linked to alcohol consumption. (1) In a mouse genetic model of chronic ethanol exposure and progressive consumption, Dnm3 expression significantly correlates with ethanol consumption, which may represent a major mechanism of ethanol neuroadaptation (PMID: 27838001). (2) Additionally, a study of free radical scavenging networks demonstrated differential histone methylat…
1q41	SBP	CURDRINK	FEMALE	18716	AFR	1:217179072	rs11117785	ESRRG / LOC105372920	Locus 1q41 contains the ESRRG gene, which is linked to alcohol consumption and BP. (1) A significant association was reported between ESRRG and alcohol consumption (P=4x10-9, PMID 32193382). (2) Additionally, a suggestive association was detected for the ESRRG-alcohol interaction on mean arterial pressure (rs17669622, Frq-A=0.25, P=9x10-7, PMID 24376456) in the European population. The rs17669622…
2q24.3 *	PP	HEAVYvsNEVER	COMBINED	195504	EUR	2:163895894	rs79563921	FIGN / GRB14	Locus 2q24.3 contains the FIGN gene, which was identified in a GWAS study as being associated with alcohol dependence (PMID: 29460428).
3p21.1	SBP	CURDRINK	COMBINED	177153	EAS	3:53789071	rs3774602	CACNA1D	Locus 3p21.1 contains genes linked to alcohol consumption. (1) CHDH is involved in mitophagy, and chronic alcohol consumption can induce mitochondrial dysfunction and oxidative stress. A study found an association between the 3’ flanking CHDH variant and recognition memory outcomes in children prenatally exposed to alcohol (PEA), suggesting that CHDH may influence fetal vulnerability to the terat…
4q13.1	PP	HEAVYvsNEVER	COMBINED	207557	CPMA	4:62940142	rs137958729	ADGRL3 / LOC105377253	N.A.
4q21.21	SBP	HEAVYvsNEVER	FEMALE	173189	CPMA	4:80261400	rs12509595	LOC124900725 / FGF5	Locus 4q21.21 contains the BMP3 gene, which may be linked to alcohol consumption. (1) A study on adolescent rats exposed to binge-pattern alcohol consumption found that the Bmp3 gene exhibited significant hypermethylation at multiple CpG sites, indicating that alcohol can alter the epigenetic landscape of genes involved in bone development and repair (PMID: 27817987).
4q23	SBP	CURDRINK	COMBINED	1078720	CPMA	4:99318162	rs1229984	ADH1B	Locus 4q23 contains well-known genes, including ADH1A, ADH1B, ADH1C, ADH4, ADH5, ADH6, and ADH7, which encode different isoenzymes of alcohol dehydrogenase (ADH) involved, to varying degrees, in ethanol metabolism and the detoxification of other alcohols and aldehydes. (1) rs1229984 is a missense mutation in ADH1B that plays an essential role in alcohol catabolism and has been associated with alc…
5q14.1 *	PP	LIGHTvsNEVER	MALE	12392	AFR	5:80645829	rs113808516	DHFR	Locus 5q14.1 contains genes linked to alcohol consumption and BP. (1) DHFR encodes a key enzyme that incorporates dietary folic acid into the reduced folate pool. The relationship between DHFR and alcohol consumption is complex. Alcoholism is associated with folate deficiency due to reduced dietary folate intake, and heavy alcohol consumption results in decreased folate absorption (PMID: 32283069…
8q22.1	PP	LIGHTvsNEVER	FEMALE	9004	HSP	8:95543831	rs6471542	C8orf37-AS1	Locus 8q22.1 contains the NDUFAF6 gene, which was shown to have a suggestive association with alcohol dependence (P=8x10-6, PMID 29460428).
9q34.13-q34.2	SBP	LIGHTvsNEVER	FEMALE	6001	HIS	9:133232115	rs12341695	OBP2B / LOC124902294	Locus 9q34.13-q34.2 contains genes linked to alcohol consumption. (1) The interaction between Y_RNA/ABO and alcohol consumption has been reported for lipid levels in GWAS (PMID 30698716). (2) DBH (dopamine-beta-hydroxylase) is responsible for converting dopamine to noradrenaline, which may relate to alterations in neurotransmitter function and various psychiatric phenotypes, including alcohol dep…
10p12.31	SBP	LIGHTvsNEVER	COMBINED	32597	CPMA	10:20502180	rs150916804	PLXDC2 / MIR4675	Locus 10p12.31 contains the PLXDC2 gene, which is linked to alcohol consumption. (1) A transcriptome analysis suggested that alcohol-induced changes in PLXDC2 expression contributed to impaired microglial function, immune regulation, and neuroinflammation, which are key features in the development of alcohol-related neurological disorders (PMID: 29759078).
12q24.11-q24.13**	DBP	CURDRINK	COMBINED	177130	EAS	12:110902439	rs10774610	CCDC63	Locus 12q24.11 contains genes linked to alcohol consumption. (1) Several GWAS studies have identified associations between variants of CCDC63, PPP1CC, RPL29P25, MYL2, VHRT, MYL2, CUX2, LINC02356 with alcohol consumption and alcoholic liver disease (PMID 21270382, 28485404, 29460428, 33093602, 34387878, 36477530, 40465716).
	SBP	CURDRINK	COMBINED	173636	EAS	12:111681367	rs11066001	BRAP-ACAD10	Locus 12q24.12-q24.13 contains genes linked to alcohol consumption, including ALDH. (1) Ethanol exposure increases HECTD4 expression in liver cells and mouse liver tissues. Conversely, knockdown of HECTD4 in ethanol-treated cells with N-acetylcysteine decreased CYP2E1 and lipogenic gene expression, while increasing ALDH2 expression, suggesting a potential protective role against ethanol-induced h…
	SBP	HEAVYvsLIGHT	MALE	55203	EAS	12:112838931	rs4766660	RPH3A/OAS2	Locus 12q24.13 contains genes linked to alcohol consumption. (1) Several GWAS studies have identified associations between variants of PTPN11, OAS1, and OAS3 with alcohol consumption, response to alcohol consumption (flushing response), and alcoholic liver disease (PMID 21270382, 28485404, 29460428, 33093602, 36477530, 40465716)
14q24.2	PP	CURDRINK	COMBINED	839638	EUR	14:72821222	rs8015900	DPF3	Locus 14q24.2 contains genes linked to alcohol consumption. (1) A study found that variations in several chromatin remodeling complex genes, including DPF3, are significantly associated with alcohol dependence in adults and antisocial behavior in adolescents. This suggests that DPF3 may contribute to the genetic risk factors underlying AUDs and related behavioral traits (PMID: 28981154). (2) In A…
15q22.2	PP	HEAVYvsNEVER	COMBINED	221177	EUR	15:62516340	rs956006	TLN2	N.A.
Known GxAlc locus_Secondary (Table 2)
2q24.3	SBP	CURDRINK	COMBINED	840896	EUR	2:164875154	rs34357955	COBLL1 / SLC38A11	Locus 2q24.3 contains genes linked to alcohol consumption. (1) A functional gene expression detected differential GRB14 levels between inbred alcohol-preferring and non-preferring rats in the hippocampus (PMID: 17517326). (2) The GRB14 gene and alcohol consumption may be linked through their effects on insulin signaling and metabolic processes (PMID: 27061086). (3) Genes encoding Na+ voltage-gate…
2q32.1	DBP	CURDRINK	MALE	89760	EAS	2:182401485	rs34889222	PDE1A	Locus 2q32.1 contains genes linked to alcohol consumption. (1) The DNAJC10 encodes the endoplasmic reticulum (ER)-resident chaperone protein ERdj5 (PMID: 33676026). (2) Chronic and binge ethanol consumption induces ER stress in hepatocytes. Studies have shown that ERdj5 levels are increased in the livers of mice subjected to such ethanol feeding regimens (PMID: 35390453). (3) A functional study u…
3p24.1	SBP	CURDRINK	COMBINED	99554	EAS	3:27345972	rs2370957	NEK10	Locus 3p24.1 contains genes linked to alcohol consumption. (1) SLC4A7 encodes the sodium bicarbonate cotransporter (NBCn1), a protein integral to regulating intracellular pH and neuronal excitability. NBCn1 knockout mice exhibit a higher propensity for alcohol-induced conditioned place preference, indicating increased reward sensitivity to alcohol (PMID: 32620847). (2) EOMES encodes a transcripti…
4q32.3	SBP	LIGHTvsNEVER	COMBINED	129511	EAS	4:168764661	rs12499664	PALLD	Locus 4q32.3 contains genes linked to alcohol consumption. (1) A study found that DDX60 expression in oral squamous cell carcinoma (OSCC) was associated with patients who consumed alcohol, suggesting a potential interaction between alcohol exposure and DDX60 expression in the context of OSCC (PMID: 27835882). (2) Another study in lymphoblastoid cell lines from individuals with and without AUD fou…
5q14.3	DBP	HEAVYvsLIGHT	COMBINED	717323	CPMA	5:88544870	rs992623	LINC00461	Locus 5q14.3 contains genes linked to alcohol consumption. (1) Several GWAS studies have identified associations between variants of TMEM161B/LINC02488/MIR9-2HG and alcohol consumption (PMID: 30643258, 30643251, 31046077, 31358974, 32193382, 32451486, 36477530, 37106081). (2) Another GWAS also identified TMEM161B-MEF2C - rs10514299 as a novel risk factor for major depressive disorder (MDD, PMID: …
5q31.1	DBP	HEAVYvsLIGHT	COMBINED	631962	EUR	5:132490630	rs10900809	IRF1	Locus 5q31.1 contains genes linked to alcohol consumption. (1) The IRF1 gene plays a significant role in the development and progression of alcohol-related liver diseases through its involvement in immune regulation, inflammatory signaling, and cell death pathways (PMID: 40161842). IRF1 upregulates the expression of the innate immune sensor ZBP1, which leads to ethanol-induced inflammatory cell d…
6q27	DBP	HEAVYvsNEVER	COMBINED	356373	CPMA	6:165764225	rs6941064	PDE10A	Locus 6q27 contains genes linked to alcohol consumption. (1) Studies indicate that changes in PDE10A expression and availability in the striatum and related brain regions occur in rodents exposed to chronic alcohol and during withdrawal (PMID: 22741603, 24782725, 34142214). (2) A study in rats demonstrated that chronic voluntary alcohol consumption induces a reversible increase in PDE10A availabi…
7q11.23	SBP	CURDRINK	COMBINED	37779	HIS	7:73530040	rs66579735	BAZ1B-BCL7B	Locus 7q11.23 contains genes linked to alcohol consumption. (1) BCL7B, along with other genes at 7q11.23, has been identified as associated with alcohol consumption and AUD (PMID: 30643251, 30643258, 31046077, 31358974, 32451486, 36301540, 36477530, 37106081). (2) BCL7B is noted for its contribution to alcohol dependence in the adult COGA case/control sample (PMID: 28981154). (3) The BCL7B protei…
8p23.1***	SBP	HEAVYvsLIGHT	MALE	324870	EUR	8:9568812	rs36100282	TNKS	Locus 8p23.1 contains gene variants associated with alcohol consumption, as identified in GWAS studies (PMID: 30940813, 32451486, 36477530).
	DBP	HEAVYvsLIGHT	COMBINED	751317	CPMA	8:9794748	rs7836375	TNKS / LOC124902057
8q11.21	PP	HEAVYvsLIGHT	COMBINED	326989	CPMA	8:51295062	rs28890775	PXDNL	N.A.
8q24.3	SBP	CURDRINK	COMBINED	75290	EAS	8:142915507	rs28394055	CYP11B2	Locus 8q24.3 contains genes linked to alcohol consumption. (1) GWAS studies have identified the GPIHBP1/ZFP41-rs56960668 interaction with alcohol affecting HDL cholesterol levels (P=1x10-16, PMID 30698716) and (2) with physical activity for HDL cholesterol (P=4x10-9, PMID 30670697). (3) A significant interaction between CYP11B2 and alcohol consumption was found concerning the risk of HTN in the C…
9p22.1	DBP	CURDRINK	COMBINED	69501	AFR	9:19181239	rs3004308	PLIN2-DENND4C	Locus 9p22.1 contains genes involved in alcohol consumption. (1) PLIN2 is implicated in alcohol-induced hepatic lipid accumulation in rodents and humans (PMID: 32029510, 37419179). PLIN2 plays a critical role in the development of alcoholic steatosis and alcohol-induced glucose dysregulation, which are associated with the risk of progressive ALD (PMID: 32029510). (2) The RRAGA gene encodes the Ra…
9q33.3	PP	LIGHTvsNEVER	COMBINED	464733	CPMA	9:125914346	rs72752651	PBX3	Locus 9q33.3 contains genes linked to alcohol consumption. (1) The MAPKAP1 gene, also known as SIN1, encodes a critical component of the mTORC2 complex, which plays a role in regulating cell growth, metabolism, and survival. A study on chronic ethanol consumption found that the expression of the MAPKAP1/SIN1 gene decreased in the amygdala, a brain region associated with emotion and addiction. Thi…
11p15.4	DBP	CURDRINK	MALE	615023	CPMA	11:9833610	rs7948810	SBF2	N.A.
14q13.2	PP	LIGHTvsNEVER	MALE	329976	CPMA	14:35401887	rs696	NFKBIA	Locus 14q13.2 contains genes linked to alcohol consumption. (1) NFKBIA encodes IκBα, an inhibitory protein that regulates the NF-κB signaling pathway. A multi-omics study analyzing postmortem human brain tissue identified NFKBIA as one of the top five hub genes associated with AUD. NFKBIA is central to gene networks related to immune response and inflammation in the dorsal and ventral striatum, r…
14q23.3	PP	HEAVYvsLIGHT	COMBINED	688950	CPMA	14:67157866	rs10139792	GPHN	A GWAS study identified GARIN2 (alias FAM71D) at locus 14q23.3 associated with alcohol consumption (PMID: 36477530).
15q26.1	DBP	CURDRINK	MALE	641158	CPMA	15:90884642	rs35346340	FES	Locus 15q26.1 has genes linked to alcohol. (1) The FURIN gene was identified for AUD in a GWAS study (PMID: 37156939). (2) A study analyzing RNA sequencing data from patients with alcoholic hepatitis revealed dysregulated expression of MAN2A2, which is associated with the endoplasmic reticulum-associated degradation (ERAD) pathway activated in response to endoplasmic reticulum stress due to alcoh…
16q12.2	SBP	HEAVYvsLIGHT	COMBINED	351969	CPMA	16:53765557	na	FTO	Locus 16q12.2 contains the FTO gene, which is linked to alcohol consumption. (1) In mouse models, chronic alcohol consumption leads to increased DNA methylation of the FTO in the kidneys, resulting in reduced FTO expression. This downregulation contributes to inflammation and kidney damage through pathways involving m6A RNA methylation and the degradation of PPAR-α mRNA (PMID: 38389820). (2) A st…
17q21.31-q21.32	PP	CURDRINK	COMBINED	912977	CPMA	17:46789595	na	WNT3, LRRC37A2	Locus 17q21.31-q21.32 contains genes linked to alcohol consumption. (1) Chronic ethanol-fed rat models demonstrated that Wnt3 ligands were downregulated in the liver. However, during liver regeneration, ethanol did not suppress Wnt3 expression, indicating a complex role of WNT3 in the liver's response to alcohol-induced injury (PMID: 25903395). (2) WNT3, LRRC37A2, and LRRC37A genes are associated…
20q13.13	DBP	CURDRINK	COMBINED	755280	EUR	20:48730238	rs11480108	PREX1	N.A.
Population groups: AFR, African; BRA, Brazilian; EAS, East Asian; EUR, European; HIS, Hispanic/Latino; and CPMA, cross-population meta-analysis.
Abbreviations: BP, blood pressure; DBP, diastolic BP; HTN, hypertension; PH, pulmonary hypertension
