# Supplementary material for: Discovery of gene-alcohol interaction loci influencing blood pressure in 1.1 million individuals from multiple populations
Source: Research Square preprint supplement (doi:10.21203/rs.3.rs-9283196/v1), 2026-04-03
Supplement: Supplementary file 12 [file 8717f67cb5b0928d7ecd642c.xlsx]

## Sheet: ST3. 23 GxAlc - full results
Supplementary Table 3. Detailed results from all analyses for the 21 primary GxAlc interaction loci
	Details													Model 2-Main Effects Model Only						M1-1df Interaction							M1-Joint 2df
Locus	Population	Trait	Alcohol Class	Sex Class	Chr	Position (hg38)	Chr:Position:Alleles	rsnumber	Allele1	Allele2	N Total	N Exposed (E1)	N Cohorts	FreqA1	Het p-value	Direction	βMarginal	SEMarginal	PMarginal	FreqA1	Het p-value	Direction	βGxE	SEGxE	PGxE	FDR (PGxE|P2step)	FreqA1	Het p-value	Direction	DirectionInt	βG	SEG	βGxE	SEGxE	CovG,GxE	P2df
	EAS	DBP	CURDRINK	COMBINED	1	20647448	1:20647448:C_T	rs12028312	T	C	177130	76414	13	0.2954	0.3349	+------++---+	-0.0219	0.04658	0.6379	0.2962	0.008134	+-+-+-+---+++	-0.0214	0.0881	0.8081		0.2961	0.01927	-----+-++----	+-+-+-+---+++	-0.02683	0.0565	0.01145	0.0877	-0.00319	0.8756
	EAS	DBP	CURDRINK	FEMALE	1	20647448	1:20647448:C_T	rs12028312	T	C	81738	20010	4	0.2956	0.5701	+-++	0.0596	0.0652	0.3602	0.2965	0.9351	-+-+	-0.0892	0.1495	0.5508		0.2963	0.8621	+-++	-+-+	0.07303	0.07059	-0.05598	0.1485	-0.00498	0.5888
	EAS	DBP	CURDRINK	MALE	1	20647448	1:20647448:C_T	rs12028312	T	C	89760	55949	11	0.2968	0.5053	-++----+--+	-0.1066	0.06311	0.09123	0.2969	0.005275	+-+-+-+--++	0.1601	0.1256	0.2022		0.2974	0.02338	-+++---++--	+-+-+-+--++	-0.1992	0.09821	0.1558	0.1245	-0.009641	0.119
	EAS	DBP	HEAVYvsLIGHT	COMBINED	1	20647448	1:20647448:C_T	rs12028312	T	C	75172	25476	5	0.2952	0.09032	+-+-+	-0.0099	0.06937	0.8867	0.2956	0.8907	--+++	-0.0181	0.141	0.898		0.2958	0.3044	+---+	--+++	-0.006036	0.08122	-0.007067	0.1411	-0.006592	0.991
	EAS	DBP	HEAVYvsLIGHT	FEMALE	1	20647448	1:20647448:C_T	rs12028312	T	C	19857	5810	3	0.2925	0.4081	+-+	0.0409	0.132	0.7566	0.294	0.6396	+--	-0.0994	0.3012	0.7413		0.2933	0.624	+-+	+--	0.05868	0.1532	-0.07807	0.2913	-0.02346	0.9272
	EAS	DBP	HEAVYvsLIGHT	MALE	1	20647448	1:20647448:C_T	rs12028312	T	C	55204	19656	5	0.2963	0.1143	+-+-+	-0.0354	0.07928	0.6554	0.2964	0.6222	-++++	0.0307	0.1594	0.8472		0.2967	0.2307	+---+	-++++	-0.0414	0.09499	0.0288	0.1602	-0.009017	0.9068
	EAS	DBP	HEAVYvsNEVER	COMBINED	1	20647448	1:20647448:C_T	rs12028312	T	C	103581	25378	5	0.2962	0.8389	+--+-	0.0196	0.05861	0.7384	0.2975	0.2697	--+-+	-0.0892	0.1388	0.5205		0.2966	0.4965	+--+-	--+-+	0.03431	0.06373	-0.05828	0.134	-0.004058	0.8504
	EAS	DBP	HEAVYvsNEVER	FEMALE	1	20647448	1:20647448:C_T	rs12028312	T	C	64036	5810	3	0.2964	0.7955	++-	0.0867	0.07216	0.2294	0.2993	0.9235	--+	-0.1611	0.271	0.5523		0.2969	0.9336	++-	--+	0.09612	0.07387	-0.1161	0.2629	-0.005448	0.4304
	EAS	DBP	HEAVYvsNEVER	MALE	1	20647448	1:20647448:C_T	rs12028312	T	C	38850	19542	5	0.2964	0.8934	-++--	-0.1011	0.09374	0.281	0.2964	0.1278	+---+	0.0692	0.1863	0.7103		0.2967	0.4186	-++--	+---+	-0.1377	0.1275	0.08979	0.1822	-0.01623	0.5281
	EAS	DBP	LIGHTvsNEVER	COMBINED	1	20647448	1:20647448:C_T	rs12028312	T	C	129493	49541	7	0.2957	0.03262	+--+--+	0.0223	0.05289	0.6724	0.2964	0.08407	+-+--++	-0.0827	0.1046	0.4288		0.2963	0.01082	++-+---	+-+--++	0.02826	0.06217	-0.02421	0.1031	-0.003863	0.9036
	EAS	DBP	LIGHTvsNEVER	FEMALE	1	20647448	1:20647448:C_T	rs12028312	T	C	72273	14047	3	0.2953	0.4617	+++	0.0895	0.06811	0.189	0.2962	0.5842	--+	-0.1003	0.17	0.5552		0.2959	0.5937	++-	--+	0.09748	0.0716	-0.05172	0.1686	-0.005125	0.3868
	EAS	DBP	LIGHTvsNEVER	MALE	1	20647448	1:20647448:C_T	rs12028312	T	C	55079	35272	5	0.2973	0.3127	+----	-0.0964	0.07778	0.2154	0.297	0.06224	+-+-+	0.0734	0.1608	0.6482		0.2978	0.0972	-----	+-+-+	-0.1889	0.125	0.1464	0.1574	-0.01561	0.2976
	EAS	PP	CURDRINK	COMBINED	1	20647448	1:20647448:C_T	rs12028312	T	C	177104	76405	13	0.2947	0.1399	-+-----++-++-	-0.0607	0.04612	0.1881	0.2954	0.1398	-++++-+++-+-+	-0.279	0.0895	0.001832		0.2961	0.1594	++---+--+-++-	-++++-+++-+-+	0.05875	0.05609	-0.3053	0.08863	-0.003144	0.001259
	EAS	PP	CURDRINK	FEMALE	1	20647448	1:20647448:C_T	rs12028312	T	C	81728	20006	4	0.295	0.113	+-+-	0.0153	0.06307	0.8081	0.2959	0.9062	-+-+	-0.1096	0.1506	0.4665		0.2963	0.3825	+-+-	-+-+	0.03977	0.06781	-0.1132	0.1466	-0.004596	0.7182
	EAS	PP	CURDRINK	MALE	1	20647448	1:20647448:C_T	rs12028312	T	C	89749	55944	11	0.296	0.5284	-+--+-++++-	-0.1525	0.06507	0.01908	0.296	0.5431	-++---++-++	-0.4411	0.1315	0.0007962		0.2975	0.7356	+--+++-+++-	-++---++-++	0.1466	0.1021	-0.4805	0.1296	-0.01043	7.965e-05
	EAS	PP	HEAVYvsLIGHT	COMBINED	1	20647448	1:20647448:C_T	rs12028312	T	C	75163	25474	5	0.2947	0.4181	--+--	-0.2698	0.06869	8.625e-05	0.2952	0.05621	++++-	0.3727	0.141	0.008208		0.2958	0.06805	-----	++++-	-0.3831	0.08053	0.3406	0.1413	-0.006483	1.665e-05
	EAS	PP	HEAVYvsLIGHT	FEMALE	1	20647448	1:20647448:C_T	rs12028312	T	C	19853	5808	3	0.2918	0.8975	--+	-0.053	0.1243	0.6699	0.2934	0.3229	+--	-0.215	0.2897	0.4579		0.2934	0.6455	-++	+--	0.003767	0.1432	-0.2385	0.2794	-0.02049	0.6257
	EAS	PP	HEAVYvsLIGHT	MALE	1	20647448	1:20647448:C_T	rs12028312	T	C	55199	19656	5	0.2957	0.5637	-++--	-0.36	0.08012	7.016e-06	0.2959	0.1316	++++-	0.5929	0.1633	0.000282	0.013653	0.2967	0.2067	-----	++++-	-0.5624	0.09656	0.5743	0.1636	-0.009319	6.381e-08
	EAS	PP	HEAVYvsNEVER	COMBINED	1	20647448	1:20647448:C_T	rs12028312	T	C	103571	25376	5	0.2956	0.2953	++-+-	0.034	0.05728	0.5531	0.2969	0.2527	-+++-	-0.1054	0.1421	0.4583		0.2966	0.251	+--+-	-+++-	0.05726	0.0617	-0.1154	0.1365	-0.003803	0.5841
	EAS	PP	HEAVYvsNEVER	FEMALE	1	20647448	1:20647448:C_T	rs12028312	T	C	64028	5808	3	0.2957	0.6139	++-	0.0329	0.07009	0.639	0.2985	0.855	---	-0.3149	0.2796	0.2601		0.2969	0.8841	++-	---	0.05192	0.07002	-0.2963	0.2709	-0.004895	0.491
	EAS	PP	HEAVYvsNEVER	MALE	1	20647448	1:20647448:C_T	rs12028312	T	C	38848	19542	5	0.2958	0.3336	-+-+-	0.0241	0.09508	0.8001	0.2958	0.4474	-+++-	-0.0498	0.1923	0.7957		0.2968	0.381	+--+-	-+++-	0.05653	0.1282	-0.06558	0.1871	-0.01641	0.9058
	EAS	PP	LIGHTvsNEVER	COMBINED	1	20647448	1:20647448:C_T	rs12028312	T	C	129474	49534	7	0.2951	0.1554	--++++-	-0.0734	0.05175	0.1558	0.2958	0.06715	--+++-+	-0.3962	0.1058	0.0001816		0.2963	0.1284	++--++-	--+++-+	0.06883	0.06085	-0.4232	0.1036	-0.003701	9.414e-05
	EAS	PP	LIGHTvsNEVER	FEMALE	1	20647448	1:20647448:C_T	rs12028312	T	C	72265	14045	3	0.2946	0.9978	+++	0.0461	0.06597	0.485	0.2955	0.6873	-++	-0.0527	0.1712	0.7582		0.2959	0.935	++-	-++	0.05396	0.06934	-0.04703	0.167	-0.004806	0.738
	EAS	PP	LIGHTvsNEVER	MALE	1	20647448	1:20647448:C_T	rs12028312	T	C	55070	35267	5	0.2967	0.2605	--++-	-0.3039	0.07937	0.0001295	0.2963	0.06276	--+++	-0.558	0.1645	0.0006955		0.2979	0.1692	++++-	--+++	0.06684	0.1253	-0.6044	0.1599	-0.01571	5.483e-07
	EAS	SBP	CURDRINK	COMBINED	1	20647448	1:20647448:C_T	rs12028312	T	C	177153	76420	13	0.2952	0.4232	-+-----++-+--	-0.0954	0.07394	0.1971	0.296	0.1135	-++++-+++-+++	-0.3351	0.1374	0.01477		0.2961	0.1759	+----+-++-+--	-++++-+++-+++	0.0345	0.08823	-0.322	0.1374	-0.00778	0.02946
	EAS	SBP	CURDRINK	FEMALE	1	20647448	1:20647448:C_T	rs12028312	T	C	81733	20008	4	0.2955	0.1937	+-++	0.0719	0.1028	0.4844	0.2964	0.9342	-+-+	-0.209	0.2345	0.3728		0.2962	0.5197	+-+-	-+-+	0.1129	0.1092	-0.1802	0.2307	-0.01193	0.5628
	EAS	SBP	CURDRINK	MALE	1	20647448	1:20647448:C_T	rs12028312	T	C	89776	55955	11	0.2964	0.7885	-++----+-+-	-0.2715	0.09895	0.006059	0.2965	0.2137	--+-+-+--++	-0.3266	0.1962	0.09585		0.2975	0.5167	++++---++--	--+-+-+--++	-0.04701	0.1531	-0.3554	0.1943	-0.02344	0.004438
	EAS	SBP	HEAVYvsLIGHT	COMBINED	1	20647448	1:20647448:C_T	rs12028312	T	C	75169	25478	5	0.2951	0.732	--+-+	-0.2986	0.1071	0.005331	0.2955	0.4287	++++-	0.3574	0.2156	0.09733		0.2958	0.6419	----+	++++-	-0.4118	0.1245	0.341	0.2165	-0.0155	0.00491
	EAS	SBP	HEAVYvsLIGHT	FEMALE	1	20647448	1:20647448:C_T	rs12028312	T	C	19855	5809	3	0.2924	0.6847	--+	-0.0204	0.199	0.9181	0.294	0.3315	+--	-0.2756	0.4592	0.5485		0.2933	0.578	-++	+--	0.04516	0.2328	-0.28	0.4427	-0.05417	0.8101
	EAS	SBP	HEAVYvsLIGHT	MALE	1	20647448	1:20647448:C_T	rs12028312	T	C	55203	19659	5	0.296	0.8684	--+-+	-0.4141	0.1222	0.0007069	0.2962	0.4767	++++-	0.6083	0.2442	0.01272		0.2967	0.7476	----+	++++-	-0.62	0.1458	0.5937	0.2459	-0.02125	0.0001641
	EAS	SBP	HEAVYvsNEVER	COMBINED	1	20647448	1:20647448:C_T	rs12028312	T	C	103579	25380	5	0.2961	0.4942	++-+-	0.051	0.09284	0.5827	0.2974	0.8547	-++-+	-0.2303	0.2159	0.2862		0.2967	0.737	+--+-	-++-+	0.098	0.09861	-0.2058	0.2097	-0.009714	0.5253
	EAS	SBP	HEAVYvsNEVER	FEMALE	1	20647448	1:20647448:C_T	rs12028312	T	C	64032	5809	3	0.2962	0.6692	++-	0.1197	0.1142	0.2944	0.2991	0.8395	---	-0.46	0.4244	0.2784		0.2969	0.8441	++-	---	0.1496	0.1142	-0.392	0.412	-0.01303	0.3562
	EAS	SBP	HEAVYvsNEVER	MALE	1	20647448	1:20647448:C_T	rs12028312	T	C	38852	19545	5	0.2963	0.5599	-++--	-0.0845	0.1459	0.5626	0.2963	0.8535	---++	-0.0322	0.2899	0.9116		0.2968	0.8197	++---	---++	-0.06251	0.1972	-0.02654	0.2832	-0.03884	0.8659
	EAS	SBP	LIGHTvsNEVER	COMBINED	1	20647448	1:20647448:C_T	rs12028312	T	C	129511	49545	7	0.2956	0.5184	---+++-	-0.0679	0.08331	0.4149	0.2964	0.09569	--+++-+	-0.5098	0.1635	0.001821		0.2963	0.1625	++-+++-	--+++-+	0.09712	0.09655	-0.4782	0.1609	-0.009318	0.009858
	EAS	SBP	LIGHTvsNEVER	FEMALE	1	20647448	1:20647448:C_T	rs12028312	T	C	72269	14046	3	0.2951	0.7151	+++	0.134	0.1072	0.2115	0.2961	0.5552	--+	-0.1674	0.2671	0.5307		0.2959	0.712	++-	--+	0.1524	0.1108	-0.1133	0.2617	-0.01227	0.3909
	EAS	SBP	LIGHTvsNEVER	MALE	1	20647448	1:20647448:C_T	rs12028312	T	C	55092	35275	5	0.2972	0.9816	---+-	-0.4198	0.1213	0.0005369	0.2968	0.09132	--+++	-0.5335	0.2497	0.03264		0.2979	0.3503	+----	--+++	-0.1102	0.1925	-0.4972	0.2434	-0.03706	0.0002757
	HIS	DBP	CURDRINK	COMBINED	1	40133103	1:40133103:C_T	rs4492609	T	C	37774	14459	9	0.7607	0.01296	+-++++++-	0.1213	0.08027	0.1309	0.7601	0.6182	+--+-+++-	0.1183	0.1778	0.5058		0.7613	0.1007	+-+++++--	+--+-+++-	0.03795	0.09672	0.255	0.1679	-0.009217	0.1005
	HIS	DBP	CURDRINK	FEMALE	1	40133103	1:40133103:C_T	rs4492609	T	C	16636	3966	8	0.7572	0.1895	+-+-++--	-0.2545	0.1121	0.02328	0.7552	0.9368	-++-+---	-0.2652	0.295	0.3687		0.757	0.5334	+-++++--	-++-+---	-0.2287	0.1232	-0.1581	0.2811	-0.01482	0.05936
	HIS	DBP	CURDRINK	MALE	1	40133103	1:40133103:C_T	rs4492609	T	C	20813	10187	8	0.764	0.469	++++++++	0.4851	0.1159	2.875e-05	0.7636	0.1052	+--+-+-+	0.1139	0.2348	0.6274		0.7646	0.194	+++++++-	+--+-+-+	0.4351	0.156	0.1195	0.2276	-0.02405	0.000115
	HIS	DBP	HEAVYvsLIGHT	COMBINED	1	40133103	1:40133103:C_T	rs4492609	T	C	12275	2110	6	0.7612	0.01145	-++++-	0.2855	0.1469	0.05202	0.7622	0.0622	++--+-	-0.1123	0.3897	0.7732		0.7654	0.005647	-++++-	++--+-	0.3161	0.1637	-0.1178	0.3779	-0.02631	0.1321
	HIS	DBP	HEAVYvsLIGHT	MALE	1	40133103	1:40133103:C_T	rs4492609	T	C	8876	1547	5	0.7612	0.02845	-++++	0.5926	0.175	0.00071	0.7611	0.003045	+--++	-0.0268	0.4672	0.9543		0.7654	0.001119	-+++-	+--++	0.5987	0.1966	0.03643	0.448	-0.03804	0.002916
	HIS	DBP	HEAVYvsNEVER	COMBINED	1	40133103	1:40133103:C_T	rs4492609	T	C	9746	2112	6	0.7622	0.04923	+++++-	0.0422	0.1344	0.7535	0.7577	0.2037	++--+-	-0.1269	0.433	0.7695		0.764	0.04613	+-++--	++--+-	0.01369	0.1508	0.1986	0.3696	-0.02235	0.8185
	HIS	DBP	LIGHTvsNEVER	COMBINED	1	40133103	1:40133103:C_T	rs4492609	T	C	18567	10542	7	0.7641	0.0009457	-+++++-	0.1592	0.1073	0.1378	0.7598	0.7944	-+-+-+-	-0.4301	0.266	0.1059		0.7667	0.007366	--++++-	-+-+-+-	0.04307	0.1462	0.2373	0.2144	-0.02117	0.1997
	HIS	DBP	LIGHTvsNEVER	FEMALE	1	40133103	1:40133103:C_T	rs4492609	T	C	9004	2709	6	0.7638	0.4679	------	-0.4006	0.1467	0.006343	0.7591	0.1772	+-----	-0.3077	0.3888	0.4287		0.7669	0.2702	--++--	+-----	-0.3382	0.1668	-0.2609	0.3396	-0.02733	0.01761
	HIS	DBP	LIGHTvsNEVER	MALE	1	40133103	1:40133103:C_T	rs4492609	T	C	9242	7534	5	0.7639	0.0574	-+++-	0.7481	0.1624	4.066e-06	0.7623	0.03087	-++-+	-1.5321	0.4315	0.0003844	0.027054	0.7662	0.0002937	++++-	-++-+	1.276	0.3143	-0.7314	0.3673	-0.0983	5.267e-06
	HIS	PP	CURDRINK	COMBINED	1	40133103	1:40133103:C_T	rs4492609	T	C	37774	14459	9	0.7592	0.5499	---+++++-	-0.0551	0.1014	0.5874	0.7584	0.7076	--++--+++	-0.0314	0.2124	0.8823		0.7613	0.7154	---+++---	--++--+++	-0.07161	0.1218	0.04397	0.2038	-0.0146	0.8306
	HIS	PP	CURDRINK	FEMALE	1	40133103	1:40133103:C_T	rs4492609	T	C	16636	3966	8	0.7554	0.2466	----+++-	-0.1407	0.1463	0.3362	0.7542	0.7691	-+-+--++	0.213	0.3575	0.5513		0.757	0.6131	----++--	-+-+--++	-0.2246	0.1617	0.3652	0.3433	-0.02548	0.3395
	HIS	PP	CURDRINK	MALE	1	40133103	1:40133103:C_T	rs4492609	T	C	20813	10187	8	0.7622	0.9882	---+--+-	-0.0045	0.1357	0.9737	0.7617	0.506	--+-+-++	-0.2981	0.2686	0.2671		0.7646	0.9079	++-+-++-	--+-+-++	0.1482	0.1835	-0.3132	0.2638	-0.03327	0.4972
	HIS	PP	HEAVYvsLIGHT	COMBINED	1	40133103	1:40133103:C_T	rs4492609	T	C	12275	2110	6	0.7577	0.5281	-+-+++	0.04	0.1622	0.8051	0.758	0.3713	++---+	-0.2831	0.4232	0.5036		0.7654	0.6023	--+++-	++---+	0.0911	0.1781	-0.2994	0.4161	-0.03101	0.7515
	HIS	PP	HEAVYvsLIGHT	MALE	1	40133103	1:40133103:C_T	rs4492609	T	C	8876	1547	5	0.7584	0.528	---+-	-0.0887	0.1953	0.6496	0.7578	0.3614	++---	-0.3564	0.5081	0.483		0.7654	0.5589	--+++	++---	0.001299	0.2159	-0.426	0.497	-0.04575	0.64
	HIS	PP	HEAVYvsNEVER	COMBINED	1	40133103	1:40133103:C_T	rs4492609	T	C	9746	2112	6	0.7589	0.5501	-++---	-0.1419	0.1797	0.4297	0.7544	0.4513	+----+	-0.3559	0.4949	0.4721		0.764	0.5277	-++-+-	+----+	-0.1474	0.1998	-0.03357	0.4439	-0.03907	0.6894
	HIS	PP	LIGHTvsNEVER	COMBINED	1	40133103	1:40133103:C_T	rs4492609	T	C	18567	10542	7	0.7614	0.451	--++++-	-0.0028	0.1373	0.984	0.7567	0.2272	----+-+	-0.0439	0.3201	0.891		0.7667	0.3332	-+++-+-	----+-+	-0.1396	0.1987	0.2529	0.269	-0.03908	0.6445
	HIS	PP	LIGHTvsNEVER	FEMALE	1	40133103	1:40133103:C_T	rs4492609	T	C	9004	2709	6	0.7617	0.6893	-++-+-	-0.1969	0.1975	0.319	0.7569	0.9137	----++	0.5891	0.4684	0.2085		0.7669	0.9731	-+++--	----++	-0.4111	0.2361	0.6829	0.4184	-0.05465	0.1591
	HIS	PP	LIGHTvsNEVER	MALE	1	40133103	1:40133103:C_T	rs4492609	T	C	9242	7534	5	0.7596	0.937	+++++	0.164	0.1848	0.3752	0.7579	0.4578	---+-	-0.793	0.4715	0.09256		0.7662	0.7163	+++++	---+-	0.6258	0.3733	-0.6026	0.4261	-0.1386	0.2443
	HIS	SBP	CURDRINK	COMBINED	1	40133103	1:40133103:C_T	rs4492609	T	C	37779	14461	9	0.76	0.06753	---+++++-	0.0971	0.1416	0.493	0.7591	0.6971	---+-++++	0.0857	0.298	0.7735		0.7614	0.2658	+--++++--	---+-++++	-0.0001767	0.1699	0.2855	0.2852	-0.02842	0.47
	HIS	SBP	CURDRINK	FEMALE	1	40133103	1:40133103:C_T	rs4492609	T	C	16638	3966	8	0.7557	0.1877	----++--	-0.4212	0.2073	0.04208	0.7542	0.9414	-+-+--++	-0.1634	0.5133	0.7503		0.757	0.5831	----++--	-+-+--++	-0.4508	0.2282	0.1054	0.4908	-0.05077	0.1061
	HIS	SBP	CURDRINK	MALE	1	40133103	1:40133103:C_T	rs4492609	T	C	20816	10189	8	0.7633	0.7731	+++++++-	0.5283	0.1912	0.005741	0.7629	0.2052	---+-+-+	-0.1866	0.3809	0.6242		0.7646	0.4564	+++++++-	---+-+-+	0.6335	0.2587	-0.2036	0.3734	-0.06614	0.01536
	HIS	SBP	HEAVYvsLIGHT	COMBINED	1	40133103	1:40133103:C_T	rs4492609	T	C	12277	2110	6	0.7599	0.1032	-++++-	0.342	0.2359	0.1472	0.76	0.1523	++---+	-0.4494	0.6209	0.4691		0.7654	0.1099	-++++-	++---+	0.4277	0.26	-0.4667	0.6096	-0.06623	0.2607
	HIS	SBP	HEAVYvsLIGHT	MALE	1	40133103	1:40133103:C_T	rs4492609	T	C	8878	1547	5	0.7606	0.08528	-++++	0.5444	0.2798	0.0517	0.7597	0.0644	++-++	-0.3931	0.7355	0.593		0.7654	0.04966	-++++	++-++	0.6392	0.3105	-0.4174	0.7167	-0.09473	0.1153
	HIS	SBP	HEAVYvsNEVER	COMBINED	1	40133103	1:40133103:C_T	rs4492609	T	C	9746	2112	6	0.7598	0.1787	-++++-	-0.0641	0.2465	0.7949	0.7552	0.2773	++---+	-0.6156	0.6962	0.3766		0.764	0.1578	-++++-	++---+	-0.0654	0.2726	0.005787	0.621	-0.0728	0.9664
	HIS	SBP	LIGHTvsNEVER	COMBINED	1	40133103	1:40133103:C_T	rs4492609	T	C	18569	10544	7	0.7627	0.006857	-+++++-	0.2341	0.1892	0.216	0.7578	0.7746	----+--	-0.477	0.4548	0.2943		0.7667	0.05531	-+++++-	----+--	-0.018	0.2731	0.4643	0.3751	-0.07383	0.2283
	HIS	SBP	LIGHTvsNEVER	FEMALE	1	40133103	1:40133103:C_T	rs4492609	T	C	9004	2709	6	0.7625	0.5577	--+---	-0.6471	0.2759	0.01902	0.7577	0.6559	+---+-	0.2184	0.6753	0.7464		0.7669	0.7315	--++--	+---+-	-0.7599	0.3253	0.4037	0.5959	-0.1038	0.0519
	HIS	SBP	LIGHTvsNEVER	MALE	1	40133103	1:40133103:C_T	rs4492609	T	C	9244	7536	5	0.7617	0.4018	++++-	0.9958	0.2623	0.0001475	0.7595	0.4238	-----	-2.5159	0.6914	0.0002737		0.7663	0.06954	+++++	-----	2.229	0.5356	-1.625	0.6123	-0.2854	2.512e-05
	EUR	DBP	CURDRINK	COMBINED	1	64708479	1:64708479:A_T	rs562453676	A	T	269868	159055	3	0.9908	0.7636	????????????????????-????????????????????????-?????????????+???	-0.2552	0.2706	0.3457	0.9922	0.9901	????????????????????+????????????????????????+?????????????+???	1.7965	0.5532	0.001165		0.9959	0.7926	????????????????????-????????????????????????-?????????????-???	????????????????????+????????????????????????+?????????????+???	-1.46	0.4667	1.646	0.544	-0.2175	0.01268
	EUR	DBP	CURDRINK	FEMALE	1	64708479	1:64708479:A_T	rs562453676	A	T	56030	38999	2	0.9873	0.3737	????????????????????-????????????????????????????????????+???	-0.4507	0.3753	0.2299	0.9877	0.8381	????????????????????+????????????????????????????????????+???	1.5337	0.8346	0.06612		0.9913	0.5253	????????????????????-????????????????????????????????????-???	????????????????????+????????????????????????????????????+???	-1.569	0.7294	1.427	0.8293	-0.5312	0.1168
	EUR	DBP	CURDRINK	MALE	1	64708479	1:64708479:A_T	rs562453676	A	T	200138	112559	2	0.9935	0.8269	???????????????????+?????????????????????-?????????????	-0.0145	0.3646	0.9683	0.9954	0.8851	???????????????????+?????????????????????+?????????????	1.8633	0.7568	0.01382		0.997	0.8563	???????????????????-?????????????????????-?????????????	???????????????????+?????????????????????+?????????????	-1.222	0.6171	1.735	0.7315	-0.3804	0.07755
	EUR	DBP	HEAVYvsLIGHT	COMBINED	1	64708479	1:64708479:A_T	rs562453676	A	T	140915	21845	2	0.9896	0.473	??????????????????+?????????????????????+?????????????????	0.1522	0.3141	0.6281	0.9919	0.2092	??????????????????-?????????????????????+?????????????????	-0.1358	0.9692	0.8886		0.9945	0.3326	??????????????????+?????????????????????+?????????????????	??????????????????-?????????????????????+?????????????????	0.1332	0.3016	-0.01665	0.9511	-0.09056	0.9073
	EUR	DBP	HEAVYvsLIGHT	MALE	1	64708479	1:64708479:A_T	rs562453676	A	T	107541	19578	2	0.9923	0.6553	????????????????+??????????????????+?????????????	0.5301	0.43	0.2176	0.9937	0.3507	????????????????-??????????????????+?????????????	0.7667	1.137	0.5002		0.9963	0.5756	????????????????+??????????????????+?????????????	????????????????-??????????????????+?????????????	0.3807	0.4416	0.7935	1.123	-0.1942	0.3864
	EUR	DBP	HEAVYvsNEVER	COMBINED	1	64708479	1:64708479:A_T	rs562453676	A	T	40138	21964	2	0.9908	0.1992	???????-??????????-?????????	-1.3267	0.6225	0.03308	0.9907	0.1375	???????+??????????+?????????	2.0694	1.2969	0.1106		0.9956	0.2675	???????-??????????-?????????	???????+??????????+?????????	-2.35	0.7875	2.407	1.199	-0.619	0.01492
	EUR	DBP	LIGHTvsNEVER	COMBINED	1	64708479	1:64708479:A_T	rs562453676	A	T	137245	119122	2	0.9891	0.6375	?????????-??????????+?????????	-0.1779	0.3023	0.5564	0.9882	0.4318	?????????+??????????+?????????	2.4558	0.8261	0.002952		0.9943	0.7131	?????????-??????????-?????????	?????????+??????????+?????????	-2.329	0.7748	2.473	0.8299	-0.5999	0.01542
	EUR	PP	CURDRINK	COMBINED	1	64708479	1:64708479:A_T	rs562453676	A	T	269868	159055	3	0.9902	0.4019	????????????????????+????????????????????????+?????????????-???	0.0616	0.3163	0.8456	0.9917	0.7135	????????????????????+????????????????????????+?????????????+???	0.9591	0.6752	0.1554		0.9959	0.6195	????????????????????-????????????????????????-?????????????-???	????????????????????+????????????????????????+?????????????+???	-0.6275	0.5664	0.9032	0.6555	-0.3204	0.4271
	EUR	PP	CURDRINK	FEMALE	1	64708479	1:64708479:A_T	rs562453676	A	T	56030	38999	2	0.9877	0.2585	????????????????????-????????????????????????????????????-???	-0.1441	0.4141	0.7279	0.9882	0.6052	????????????????????+????????????????????????????????????+???	1.7384	0.9538	0.06836		0.9913	0.6017	????????????????????-????????????????????????????????????-???	????????????????????+????????????????????????????????????+???	-1.581	0.8122	1.839	0.9268	-0.6587	0.1544
	EUR	PP	CURDRINK	MALE	1	64708479	1:64708479:A_T	rs562453676	A	T	200138	112559	2	0.9926	0.9433	???????????????????+?????????????????????+?????????????	0.1235	0.4525	0.7849	0.9949	0.2217	???????????????????-?????????????????????+?????????????	-0.0728	0.9857	0.9411		0.997	0.475	???????????????????+?????????????????????-?????????????	???????????????????-?????????????????????+?????????????	0.1918	0.806	-0.1162	0.9425	-0.649	0.963
	EUR	PP	HEAVYvsLIGHT	COMBINED	1	64708479	1:64708479:A_T	rs562453676	A	T	140915	21845	2	0.989	0.7732	??????????????????+?????????????????????+?????????????????	0.2733	0.36	0.4478	0.9909	0.8176	??????????????????-?????????????????????-?????????????????	-6.9393	1.12	5.727e-10	0.00820399	0.9945	0.4044	??????????????????+?????????????????????+?????????????????	??????????????????-?????????????????????-?????????????????	0.8683	0.3405	-6.691	1.116	-0.1155	1.192e-07
	EUR	PP	HEAVYvsLIGHT	MALE	1	64708479	1:64708479:A_T	rs562453676	A	T	107541	19578	2	0.9915	0.705	????????????????-??????????????????+?????????????	-0.0044	0.5163	0.9931	0.9927	0.8843	????????????????-??????????????????-?????????????	-6.9457	1.349	2.621e-07		0.9963	0.63	????????????????+??????????????????+?????????????	????????????????-??????????????????-?????????????	0.9774	0.5181	-6.804	1.349	-0.2673	8.348e-06
	EUR	PP	HEAVYvsNEVER	COMBINED	1	64708479	1:64708479:A_T	rs562453676	A	T	40138	21964	2	0.9903	0.1854	???????-??????????-?????????	-3.0145	0.731	3.728e-05	0.9901	0.5927	???????-??????????-?????????	-4.5867	1.5194	0.002539		0.9956	0.8659	???????-??????????-?????????	???????-??????????-?????????	-1.21	0.9013	-4.607	1.415	-0.8107	7.426e-07
	EUR	PP	LIGHTvsNEVER	COMBINED	1	64708479	1:64708479:A_T	rs562453676	A	T	137245	119122	2	0.9886	0.1588	?????????+??????????+?????????	0.6291	0.3508	0.07294	0.9879	0.3766	?????????+??????????+?????????	1.9877	0.9957	0.0459		0.9943	0.3171	?????????-??????????-?????????	?????????+??????????+?????????	-1.176	0.9122	2.066	0.9786	-0.8316	0.02751
	EUR	SBP	CURDRINK	COMBINED	1	64708479	1:64708479:A_T	rs562453676	A	T	269868	159055	3	0.9903	0.871	????????????????????-????????????????????????+?????????????-???	-0.162	0.4351	0.7096	0.9917	0.8341	????????????????????+????????????????????????+?????????????+???	2.7202	0.9004	0.002519		0.9959	0.7933	????????????????????-????????????????????????-?????????????-???	????????????????????+????????????????????????+?????????????+???	-2.031	0.7577	2.492	0.8773	-0.5733	0.03154
	EUR	SBP	CURDRINK	FEMALE	1	64708479	1:64708479:A_T	rs562453676	A	T	56030	38999	2	0.9874	0.8999	????????????????????-????????????????????????????????????-???	-0.5548	0.5822	0.3407	0.9877	0.6407	????????????????????+????????????????????????????????????+???	3.2295	1.3003	0.01301		0.9913	0.8821	????????????????????-????????????????????????????????????-???	????????????????????+????????????????????????????????????+???	-3.059	1.125	3.196	1.279	-1.263	0.03778
	EUR	SBP	CURDRINK	MALE	1	64708479	1:64708479:A_T	rs562453676	A	T	200138	112559	2	0.9928	0.9377	???????????????????+?????????????????????+?????????????	0.1199	0.5959	0.8405	0.9948	0.3913	???????????????????+?????????????????????+?????????????	1.7949	1.267	0.1565		0.997	0.6529	???????????????????+?????????????????????-?????????????	???????????????????+?????????????????????+?????????????	-1.061	1.041	1.629	1.218	-1.082	0.4317
	EUR	SBP	HEAVYvsLIGHT	COMBINED	1	64708479	1:64708479:A_T	rs562453676	A	T	140915	21845	2	0.9892	0.5145	??????????????????+?????????????????????+?????????????????	0.4105	0.4957	0.4075	0.9911	0.5374	??????????????????-?????????????????????-?????????????????	-7.2595	1.5097	1.519e-06		0.9945	0.2687	??????????????????+?????????????????????+?????????????????	??????????????????-?????????????????????-?????????????????	1.011	0.4628	-6.87	1.502	-0.2133	9.94e-05
	EUR	SBP	HEAVYvsLIGHT	MALE	1	64708479	1:64708479:A_T	rs562453676	A	T	107541	19578	2	0.9917	0.5722	????????????????+??????????????????+?????????????	0.5066	0.6891	0.4622	0.9928	0.6198	????????????????-??????????????????-?????????????	-6.3719	1.7916	0.0003758		0.9963	0.5269	????????????????+??????????????????+?????????????	????????????????-??????????????????-?????????????	1.371	0.6919	-6.176	1.794	-0.4766	0.003623
	EUR	SBP	HEAVYvsNEVER	COMBINED	1	64708479	1:64708479:A_T	rs562453676	A	T	40138	21964	2	0.9904	0.8176	???????-??????????-?????????	-4.4319	0.9838	6.635e-06	0.9902	0.1903	???????-??????????+?????????	-2.7067	2.018	0.1798		0.9956	0.3919	???????-??????????-?????????	???????-??????????+?????????	-3.521	1.207	-2.384	1.882	-1.455	9.636e-06
	EUR	SBP	LIGHTvsNEVER	COMBINED	1	64708479	1:64708479:A_T	rs562453676	A	T	137245	119122	2	0.9887	0.1742	?????????+??????????+?????????	0.4568	0.4793	0.3406	0.988	0.2494	?????????+??????????+?????????	4.414	1.3022	0.0006999		0.9943	0.2833	?????????-??????????-?????????	?????????+??????????+?????????	-3.477	1.211	4.512	1.299	-1.466	0.003255
	HIS	DBP	CURDRINK	COMBINED	1	171959446	1:171959446:C_T	rs79684633	T	C	24719	10237	2	0.9946	0.01214	?????+-??	0.8509	0.6657	0.2012	0.9947	0.448	?????+-??	0.1656	1.3612	0.9032		0.9952	0.03476	?????+-??	?????+-??	0.6273	0.8519	0.7055	1.34	-0.7193	0.3406
	HIS	DBP	CURDRINK	MALE	1	171959446	1:171959446:C_T	rs79684633	T	C	16589	8123	2	0.9948	0.002783	?????+-?	0.6885	0.879	0.4335	0.9948	0.3053	?????+-?	0.4641	1.722	0.7875		0.9955	0.005624	?????+-?	?????+-?	0.4191	1.226	0.5559	1.718	-1.494	0.688
	HIS	PP	CURDRINK	COMBINED	1	171959446	1:171959446:C_T	rs79684633	T	C	24719	10237	2	0.9944	0.6162	?????--??	-0.6775	0.745	0.3632	0.9944	0.5941	?????--??	-8.413	1.4864	1.52e-08	0.0451182	0.9952	0.3794	?????++??	?????--??	2.496	0.9212	-8.112	1.473	-0.8404	1.72e-07
	HIS	PP	CURDRINK	MALE	1	171959446	1:171959446:C_T	rs79684633	T	C	16589	8123	2	0.9943	0.0851	?????--?	-2.3335	0.9418	0.01322	0.9943	0.3328	?????--?	-8.3895	1.8246	4.27e-06		0.9955	0.1265	?????++?	?????--?	1.861	1.304	-8.31	1.831	-1.686	1.72e-06
	HIS	SBP	CURDRINK	COMBINED	1	171959446	1:171959446:C_T	rs79684633	T	C	24724	10239	2	0.9945	0.05501	?????+-??	0.1869	1.069	0.8612	0.9946	0.9812	?????--??	-8.221	2.1328	0.0001159		0.9952	0.04621	?????++??	?????--??	3.14	1.333	-7.363	2.108	-1.76	0.002381
	HIS	SBP	CURDRINK	MALE	1	171959446	1:171959446:C_T	rs79684633	T	C	16592	8125	2	0.9946	0.001604	?????+-?	-1.6241	1.358	0.2318	0.9946	0.9335	?????--?	-8.3001	2.6529	0.001756		0.9955	0.005382	?????+-?	?????--?	2.462	1.892	-8.123	2.653	-3.553	0.004532
	AFR	DBP	CURDRINK	COMBINED	1	217179072	1:217179072:C_T	rs11117785	T	C	62587	27070	10	0.9814	0.3743	-??+????+?-?-?+++-+	0.1994	0.2536	0.4319	0.9815	0.1562	-??-????+?-?+?+--+-	-0.4782	0.5187	0.3566		0.9818	0.2543	+??+????+?+?-?-++-+	-??-????+?-?+?+--+-	0.5358	0.3333	-0.7633	0.4982	-0.1104	0.2328
	AFR	DBP	CURDRINK	FEMALE	1	217179072	1:217179072:C_T	rs11117785	T	C	18715	5646	4	0.9791	0.03694	???????-??????-+?+	0.2428	0.4473	0.5872	0.9797	0.5024	???????-??????--?-	-3.3373	0.985	0.0007042		0.9798	0.3743	???????-??????++?+	???????-??????--?-	1.46	0.5334	-3.749	0.9335	-0.282	0.0003011
	AFR	DBP	CURDRINK	MALE	1	217179072	1:217179072:C_T	rs11117785	T	C	28034	12649	3	0.981	0.1391	??????+?????++?	0.5713	0.378	0.1307	0.981	0.5123	??????+?????+-?	0.8212	0.7464	0.2712		0.981	0.397	??????+?????++?	??????+?????+-?	0.1646	0.5206	0.8438	0.7447	-0.2695	0.1638
	AFR	DBP	HEAVYvsLIGHT	COMBINED	1	217179072	1:217179072:C_T	rs11117785	T	C	12624	1874	2	0.9786	0.1987	??????+??-	-0.2612	0.521	0.6161	0.978	0.1871	??????-??+	0.3734	1.4024	0.79		0.9789	0.1712	??????+??-	??????-??+	-0.264	0.5869	0.0314	1.357	-0.3392	0.8882
	AFR	DBP	HEAVYvsNEVER	COMBINED	1	217179072	1:217179072:C_T	rs11117785	T	C	10036	1886	2	0.9777	0.008474	??????-??+	0.7989	0.5589	0.1528	0.9788	0.2673	??????+??-	0.9837	1.6305	0.5463		0.978	0.02483	??????-??+	??????+??-	1.079	0.6189	-1.176	1.37	-0.3801	0.2257
	AFR	DBP	LIGHTvsNEVER	COMBINED	1	217179072	1:217179072:C_T	rs11117785	T	C	33109	17676	6	0.9807	0.1339	-??+?????-+-+	0.2648	0.363	0.4657	0.9814	0.04013	-??+?????+++-	-0.0864	0.9574	0.9281		0.9818	0.05552	-??+?????-+-+	-??+?????+++-	0.803	0.5258	-1.005	0.7147	-0.2755	0.2909
	AFR	DBP	LIGHTvsNEVER	FEMALE	1	217179072	1:217179072:C_T	rs11117785	T	C	9243	1380	2	0.9773	0.6053	???-???????+	1.0294	0.6254	0.09975	0.9773	0.7768	???-???????-	-4.7474	1.7792	0.007624		0.9782	0.9049	???-???????+	???-???????-	1.683	0.6625	-4.778	1.773	-0.4307	0.006827
	AFR	PP	CURDRINK	COMBINED	1	217179072	1:217179072:C_T	rs11117785	T	C	62587	27070	10	0.9815	0.9213	+??+????+?-?+?+++-+	0.6944	0.3153	0.02762	0.9815	0.03238	+??-????+?-?-?-+---	-0.7898	0.643	0.2193		0.9818	0.2398	+??+????+?-?+?+++++	+??-????+?-?-?-+---	1.039	0.4186	-0.7492	0.6156	-0.1742	0.04037
	AFR	PP	CURDRINK	FEMALE	1	217179072	1:217179072:C_T	rs11117785	T	C	18715	5646	4	0.9794	0.8802	???????-??????++?+	0.6207	0.551	0.26	0.9799	0.9216	???????-??????--?-	-6.615	1.1963	3.207e-08		0.9798	0.5461	???????-??????++?+	???????-??????--?-	2.609	0.6675	-5.868	1.136	-0.4418	8.678e-07
	AFR	PP	CURDRINK	MALE	1	217179072	1:217179072:C_T	rs11117785	T	C	28034	12649	3	0.981	0.2074	??????+?????++?	0.8306	0.4567	0.06898	0.981	0.9539	??????+?????++?	2.6659	0.9015	0.003103		0.981	0.737	??????+?????--?	??????+?????++?	-0.4892	0.6285	2.69	0.8979	-0.3928	0.002265
	AFR	PP	HEAVYvsLIGHT	COMBINED	1	217179072	1:217179072:C_T	rs11117785	T	C	12624	1874	2	0.9787	0.001008	??????+??-	0.3259	0.6206	0.5995	0.9783	0.8568	??????-??+	0.0474	1.6121	0.9765		0.9789	0.004517	??????+??-	??????-??+	0.4569	0.6793	-0.7627	1.593	-0.4546	0.7798
	AFR	PP	HEAVYvsNEVER	COMBINED	1	217179072	1:217179072:C_T	rs11117785	T	C	10036	1886	2	0.9779	0.8392	??????+??+	1.0983	0.7181	0.1261	0.9791	0.09701	??????+??-	-2.264	2.0034	0.2584		0.978	0.2323	??????+??+	??????+??-	1.495	0.8041	-1.821	1.681	-0.6421	0.173
	AFR	PP	LIGHTvsNEVER	COMBINED	1	217179072	1:217179072:C_T	rs11117785	T	C	33109	17676	6	0.9812	0.4301	+??+?????++-+	0.983	0.4391	0.02515	0.9818	0.2049	-??+?????++--	-1.7691	1.1519	0.1246		0.9818	0.2884	+??+?????++++	-??+?????++--	1.734	0.6565	-1.326	0.8714	-0.4297	0.02484
	AFR	PP	LIGHTvsNEVER	FEMALE	1	217179072	1:217179072:C_T	rs11117785	T	C	9243	1380	2	0.9775	0.4934	???-???????+	0.6362	0.8104	0.4324	0.9777	0.3875	???-???????-	-6.2333	2.2589	0.005789		0.9782	0.6416	???-???????+	???-???????-	1.554	0.8612	-6.307	2.236	-0.7287	0.01362
	AFR	SBP	CURDRINK	COMBINED	1	217179072	1:217179072:C_T	rs11117785	T	C	62588	27070	10	0.9814	0.6951	+??+????+?-?-?+++-+	0.8581	0.4329	0.04743	0.9815	0.01375	-??-????-?-?+?-+---	-1.355	0.8807	0.1239		0.9818	0.09579	+??+????+?+?-?+++-+	-??-????-?-?+?-+---	1.569	0.5713	-1.569	0.8475	-0.3244	0.0248
	AFR	SBP	CURDRINK	FEMALE	1	217179072	1:217179072:C_T	rs11117785	T	C	18716	5646	4	0.9794	0.3779	???????+??????-+?+	0.8705	0.7575	0.2505	0.9799	0.7759	???????-??????--?-	-10.0868	1.6417	8.04e-10	0.00526517	0.9798	0.799	???????+??????++?+	???????-??????--?-	4.164	0.9115	-9.772	1.559	-0.8238	2.118e-09
	AFR	SBP	CURDRINK	MALE	1	217179072	1:217179072:C_T	rs11117785	T	C	28034	12649	3	0.981	0.8311	??????-?????++?	1.2144	0.6172	0.0491	0.9809	0.8095	??????-?????++?	3.3075	1.2226	0.006821		0.981	0.9561	??????+?????-+?	??????-?????++?	-0.3719	0.8527	3.312	1.218	-0.723	0.00336
	AFR	SBP	HEAVYvsLIGHT	COMBINED	1	217179072	1:217179072:C_T	rs11117785	T	C	12624	1874	2	0.9787	0.00203	??????+??-	0.1218	0.8592	0.8872	0.9783	0.3747	??????-??+	0.2162	2.2557	0.9236		0.9789	0.005542	??????+??-	??????-??+	0.2699	0.9469	-0.8581	2.22	-0.8833	0.9198
	AFR	SBP	HEAVYvsNEVER	COMBINED	1	217179072	1:217179072:C_T	rs11117785	T	C	10036	1886	2	0.9779	0.08375	??????-??+	1.7362	0.9824	0.07718	0.979	0.06382	??????+??-	-1.0987	2.7543	0.69		0.978	0.08483	??????-??+	??????+??-	2.431	1.101	-2.915	2.308	-1.203	0.08764
	AFR	SBP	LIGHTvsNEVER	COMBINED	1	217179072	1:217179072:C_T	rs11117785	T	C	33109	17676	6	0.9809	0.2007	-??+?????++-+	1.1741	0.6043	0.05205	0.9815	0.01512	-??-?????++--	-2.238	1.5626	0.1521		0.9818	0.03667	+??+?????-+-+	-??-?????++--	2.509	0.8886	-2.399	1.191	-0.7871	0.01946
	AFR	SBP	LIGHTvsNEVER	FEMALE	1	217179072	1:217179072:C_T	rs11117785	T	C	9243	1380	2	0.9778	0.9374	???+???????+	1.8783	1.076	0.08081	0.9781	0.4604	???-???????-	-10.6691	2.9322	0.0002742		0.9782	0.5802	???+???????+	???-???????-	3.495	1.149	-10.29	2.884	-1.3	0.00038
	EUR	DBP	CURDRINK	COMBINED	2	45054724	2:45054724:C_T	rs578068419	T	C	249290	136932	4	0.0027	0.8528	???????????????????????????+?-???????????????+?????????????+???	0.2728	0.378	0.4706	0.0026	0.5255	???????????????????????????+?-???????????????-?????????????+???	0.3301	0.683	0.6289		0.0024	0.8149	???????????????????????????+?-???????????????+?????????????-???	???????????????????????????+?-???????????????-?????????????+???	0.02457	0.527	0.459	0.681	-0.2777	0.5717
	EUR	DBP	CURDRINK	FEMALE	2	45054724	2:45054724:C_T	rs578068419	T	C	36615	20478	2	0.0024	0.05539	???????????????????????????????????????????-?????????????+???	-0.4471	0.9246	0.6288	0.0024	0.4315	???????????????????????????????????????????+?????????????+???	2.3624	1.7914	0.1872		0.0024	0.1775	???????????????????????????????????????????-?????????????-???	???????????????????????????????????????????+?????????????+???	-2.143	1.395	2.872	1.769	-1.945	0.2777
	EUR	DBP	HEAVYvsLIGHT	COMBINED	2	45054724	2:45054724:C_T	rs578068419	T	C	114052	21651	2	0.003	0.4904	???????????????????????+????????????????+?????????????????	0.3784	0.5178	0.465	0.0032	0.6039	???????????????????????-????????????????-?????????????????	-1.521	1.171	0.1941		0.0025	0.6462	???????????????????????+????????????????+?????????????????	???????????????????????-????????????????-?????????????????	0.689	0.5147	-1.449	1.183	-0.2648	0.3546
	EUR	DBP	HEAVYvsNEVER	COMBINED	2	45054724	2:45054724:C_T	rs578068419	T	C	37103	21770	2	0.0033	0.4792	???????????+??????-?????????	-0.5981	0.8267	0.4693	0.0033	0.746	???????????+??????-?????????	-0.5041	1.5662	0.7476		0.0026	0.7073	???????????+??????-?????????	???????????+??????-?????????	-0.1453	1.161	-0.5741	1.575	-1.348	0.7969
	EUR	DBP	LIGHTvsNEVER	COMBINED	2	45054724	2:45054724:C_T	rs578068419	T	C	119474	96257	3	0.003	0.8271	?????????????+?-????+?????????	0.4684	0.5088	0.3572	0.0033	0.9946	?????????????+?+????+?????????	0.8346	1.2584	0.5072		0.0025	0.9759	?????????????+?-????-?????????	?????????????+?+????+?????????	-0.145	1.143	0.7827	1.253	-1.305	0.4901
	EUR	PP	CURDRINK	COMBINED	2	45054724	2:45054724:C_T	rs578068419	T	C	249290	136932	4	0.0028	0.6082	???????????????????????????-?-???????????????+?????????????-???	-0.3074	0.4648	0.5085	0.0026	0.002536	???????????????????????????-?+???????????????-?????????????+???	-2.4239	0.8581	0.004735		0.0024	0.01697	???????????????????????????+?-???????????????+?????????????-???	???????????????????????????-?+???????????????-?????????????+???	1.162	0.6627	-2.351	0.8487	-0.4392	0.0307
	EUR	PP	CURDRINK	FEMALE	2	45054724	2:45054724:C_T	rs578068419	T	C	36615	20478	2	0.0024	0.363	???????????????????????????????????????????+?????????????-???	-1.0013	0.9263	0.2797	0.0024	0.5813	???????????????????????????????????????????-?????????????+???	1.2411	1.824	0.4962		0.0024	0.5783	???????????????????????????????????????????+?????????????-???	???????????????????????????????????????????-?????????????+???	-1.548	1.438	0.9873	1.799	-2.068	0.5189
	EUR	PP	HEAVYvsLIGHT	COMBINED	2	45054724	2:45054724:C_T	rs578068419	T	C	114052	21651	2	0.0031	0.4555	???????????????????????-????????????????-?????????????????	-1.3751	0.6537	0.03542	0.0033	0.9737	???????????????????????-????????????????-?????????????????	-3.9254	1.48	0.007981		0.0025	0.8714	???????????????????????-????????????????-?????????????????	???????????????????????-????????????????-?????????????????	-0.5973	0.6554	-4	1.499	-0.4294	0.004085
	EUR	PP	HEAVYvsNEVER	COMBINED	2	45054724	2:45054724:C_T	rs578068419	T	C	37103	21770	2	0.0034	0.8685	???????????+??????+?????????	0.5528	1.044	0.5966	0.0034	0.7947	???????????-??????-?????????	-11.5957	2.005	7.316e-09	0.0479314	0.0026	0.965	???????????+??????+?????????	???????????-??????-?????????	6.905	1.479	-11.58	2.01	-2.188	1.502e-07
	EUR	PP	LIGHTvsNEVER	COMBINED	2	45054724	2:45054724:C_T	rs578068419	T	C	119474	96257	3	0.0031	0.7534	?????????????+?-????+?????????	0.5841	0.6396	0.3611	0.0034	0.2604	?????????????-?+????-?????????	-6.9006	1.581	1.277e-05		0.0025	0.2599	?????????????+?-????+?????????	?????????????-?+????-?????????	5.701	1.386	-6.276	1.535	-1.921	0.000354
	EUR	SBP	CURDRINK	COMBINED	2	45054724	2:45054724:C_T	rs578068419	T	C	249290	136932	4	0.0026	0.9355	???????????????????????????+?+???????????????+?????????????-???	0.1	0.6469	0.8772	0.0025	0.006535	???????????????????????????-?+???????????????-?????????????+???	-1.6458	1.157	0.1547		0.0024	0.05161	???????????????????????????+?-???????????????+?????????????-???	???????????????????????????-?+???????????????-?????????????+???	1.02	0.884	-1.462	1.149	-0.7813	0.4797
	EUR	SBP	CURDRINK	FEMALE	2	45054724	2:45054724:C_T	rs578068419	T	C	36615	20478	2	0.0024	0.5687	???????????????????????????????????????????-?????????????-???	-1.217	1.434	0.396	0.0024	0.3712	???????????????????????????????????????????+?????????????+???	3.5312	2.7468	0.1986		0.0024	0.6083	???????????????????????????????????????????-?????????????-???	???????????????????????????????????????????+?????????????+???	-3.396	2.153	3.724	2.719	-4.635	0.3225
	EUR	SBP	HEAVYvsLIGHT	COMBINED	2	45054724	2:45054724:C_T	rs578068419	T	C	114052	21651	2	0.0029	0.9309	???????????????????????-????????????????-?????????????????	-0.936	0.9124	0.3049	0.0031	0.809	???????????????????????-????????????????-?????????????????	-5.5272	2.0395	0.006726		0.0025	0.9653	???????????????????????+????????????????+?????????????????	???????????????????????-????????????????-?????????????????	0.1396	0.8931	-5.518	2.068	-0.7973	0.02692
	EUR	SBP	HEAVYvsNEVER	COMBINED	2	45054724	2:45054724:C_T	rs578068419	T	C	37103	21770	2	0.0032	0.604	???????????+??????-?????????	-0.109	1.46	0.9405	0.0032	0.9838	???????????-??????-?????????	-12.0984	2.763	1.193e-05		0.0026	0.9238	???????????+??????+?????????	???????????-??????-?????????	6.736	2.046	-12.16	2.771	-4.186	0.000141
	EUR	SBP	LIGHTvsNEVER	COMBINED	2	45054724	2:45054724:C_T	rs578068419	T	C	119474	96257	3	0.0029	0.8624	?????????????+?+????+?????????	1.0972	0.8725	0.2086	0.0031	0.03105	?????????????-?+????-?????????	-4.6197	2.0957	0.0275		0.0025	0.1074	?????????????+?-????+?????????	?????????????-?+????-?????????	4.518	1.816	-4.169	2.02	-3.297	0.06028
	EUR	DBP	CURDRINK	COMBINED	2	163895894	2:163895894:A_G	rs79563921	A	G	716823	541298	21	0.0098	0.6369	??+??-??????-+++???++?+-???+?-????-?-????-???+??-????????-?+--?	0.1079	0.1226	0.3786	0.0108	0.4169	??-??-??????+---???-+?--???-?-????-?+????+???-??-????????-?-++?	-0.5858	0.2506	0.0194		0.0083	0.5552	??+??+??????-+++???+-?+-???+?-????-?-????-???+??-????????+?+--?	??-??-??????+---???-+?--???-?-????-?+????+???-??-????????-?-++?	0.4892	0.1976	-0.5385	0.235	-0.03899	0.06672
	EUR	DBP	CURDRINK	FEMALE	2	163895894	2:163895894:A_G	rs79563921	A	G	277360	222469	14	0.0094	0.8719	??+??+????????+????+-?????+?-??????-????+??+???????????+?+--?	0.08	0.189	0.6722	0.0107	0.5113	??+??-????????-????-+?????+?-??????+????+??+???????????-?-++?	0.0676	0.4527	0.8813		0.0078	0.8131	??+??+????????+????+-?????-?-??????-????-??-???????????+?+--?	??+??-????????-????-+?????+?-??????+????+??+???????????-?-++?	0.01075	0.3543	0.1046	0.4057	-0.1254	0.8544
	EUR	DBP	CURDRINK	MALE	2	163895894	2:163895894:A_G	rs79563921	A	G	397283	289302	7	0.0094	0.2356	??-???????????????-+???????-?????????-???+??????????-??	0.1359	0.1584	0.391	0.0103	0.05356	??-???????????????-+???????+?????????+???-??????????-??	-0.7955	0.3254	0.01448		0.0085	0.1003	??-???????????????+-???????-?????????-???+??????????+??	??-???????????????-+???????+?????????+???-??????????-??	0.7392	0.2585	-0.8764	0.3103	-0.06668	0.0186
	EUR	DBP	HEAVYvsLIGHT	COMBINED	2	163895894	2:163895894:A_G	rs79563921	A	G	528245	157151	11	0.0086	0.5966	+??-?????????????-+?+??+?-??????????????--??????????-?+???	-0.0415	0.1494	0.7814	0.0074	0.9723	+??+?????????????++?+??+?-??????????????-+??????????+?+???	0.2427	0.2975	0.4147		0.0076	0.9058	+??-?????????????-+?+??+?-??????????????--??????????-?-???	+??+?????????????++?+??+?-??????????????-+??????????+?+???	-0.08955	0.153	0.09855	0.2986	-0.02337	0.8539
	EUR	DBP	HEAVYvsLIGHT	FEMALE	2	163895894	2:163895894:A_G	rs79563921	A	G	206012	60111	7	0.0083	0.8957	???+????????++?+??????????????+???????-?+???	0.0988	0.2265	0.6628	0.0069	0.7664	???+????????--?-??????????????+???????+?+???	0.0341	0.473	0.9425		0.0073	0.929	???-????????++?+??????????????+???????-?-???	???+????????--?-??????????????+???????+?+???	0.05843	0.2348	-0.0247	0.4597	-0.05508	0.9682
	EUR	DBP	HEAVYvsLIGHT	MALE	2	163895894	2:163895894:A_G	rs79563921	A	G	270388	87399	3	0.0089	0.01572	????????????????+??????????????????-??????????-??	-0.1533	0.1951	0.4321	0.0078	0.6689	????????????????+??????????????????-??????????+??	0.0161	0.4046	0.9683		0.0079	0.06728	????????????????+??????????????????-??????????-??	????????????????+??????????????????-??????????+??	-0.122	0.2096	-0.1462	0.4018	-0.04383	0.6392
	EUR	DBP	HEAVYvsNEVER	COMBINED	2	163895894	2:163895894:A_G	rs79563921	A	G	195506	149660	7	0.0075	0.6969	++?????-???+?-????-?????-???	-0.0892	0.2417	0.7122	0.0084	0.7479	++?????+???+?-????-?????-???	0.0626	0.6055	0.9176		0.0072	0.8331	++?????-???+?-????-?????+???	++?????+???+?-????-?????-???	-0.1423	0.4548	0.08596	0.5249	-0.2067	0.933
	EUR	DBP	HEAVYvsNEVER	FEMALE	2	163895894	2:163895894:A_G	rs79563921	A	G	64034	54889	3	0.0073	0.3657	?+??-????????????+???	-0.0735	0.3959	0.8528	0.008	0.9737	?-??-????????????-???	-1.3258	1.3562	0.3283		0.007	0.5639	?+??-????????????+???	?-??-????????????-???	-0.1142	0.8371	0.05336	0.9379	-0.7007	0.9811
	EUR	DBP	HEAVYvsNEVER	MALE	2	163895894	2:163895894:A_G	rs79563921	A	G	106871	87503	3	0.0075	0.7954	????+?????????-????-?	-0.2025	0.3133	0.518	0.0085	0.1228	????+?????????-????-?	-0.2944	0.7712	0.7027		0.0069	0.315	????-?????????+????+?	????+?????????-????-?	-0.006841	0.6424	-0.2406	0.727	-0.4123	0.773
	EUR	DBP	LIGHTvsNEVER	COMBINED	2	163895894	2:163895894:A_G	rs79563921	A	G	386162	338144	10	0.0096	0.3321	??+-?????+???+?-?--?-?????-?-?	-0.168	0.1605	0.2953	0.0107	0.6567	??--?????+???-?-?-+?+?????-?+?	0.2427	0.4504	0.59		0.0081	0.5841	??++?????-???+?-?--?-?????+?-?	??--?????+???-?-?-+?+?????-?+?	-0.5182	0.3977	0.4137	0.4276	-0.1581	0.3755
	EUR	DBP	LIGHTvsNEVER	FEMALE	2	163895894	2:163895894:A_G	rs79563921	A	G	155668	134020	8	0.0092	0.8993	??++???-???-?-??-???????-?-?	-0.121	0.2468	0.624	0.0109	0.5587	??+-???+???+?-??+???????-?+?	0.487	0.7057	0.4901		0.0076	0.8675	??++???-???-?-??-???????+?-?	??+-???+???+?-??+???????-?+?	-0.5805	0.5726	0.5694	0.626	-0.3277	0.6158
	EUR	DBP	LIGHTvsNEVER	MALE	2	163895894	2:163895894:A_G	rs79563921	A	G	207455	185071	4	0.0095	0.2497	??????+?????-????-?????-?	-0.1112	0.2114	0.599	0.0098	0.1105	??????+?????+????-?????-?	0.1362	0.6629	0.8372		0.0085	0.1128	??????-?????-????-?????+?	??????+?????+????-?????-?	-0.2596	0.6339	0.1617	0.6671	-0.4016	0.8307
	EUR	PP	CURDRINK	COMBINED	2	163895894	2:163895894:A_G	rs79563921	A	G	716816	541292	21	0.0096	0.9147	??+??+??????++--???-+?--???+?-????+?-????+???-??-????????-?-++?	-0.0233	0.1442	0.8717	0.0106	0.2262	??+??+??????--+-???--?++???-?-????+?+????+???-??+????????-?--+?	-0.547	0.3068	0.07456		0.0083	0.6321	??-??-??????++--???++?--???+?-????-?-????-???+??-????????+?++-?	??+??+??????--+-???--?++???-?-????+?+????+???-??+????????-?--+?	0.3244	0.2427	-0.4797	0.2852	-0.05883	0.2849
	EUR	PP	CURDRINK	FEMALE	2	163895894	2:163895894:A_G	rs79563921	A	G	277357	222467	14	0.0091	0.9248	??-??+????????-????++?????-?-??????+????+??+???????????+?-++?	0.1899	0.2069	0.3588	0.0103	0.1257	??+??+????????+????-+?????-?-??????+????+??+???????????-?--+?	0.0696	0.5045	0.8903		0.0078	0.4635	??-??-????????-????++?????+?+??????-????-??-???????????+?++-?	??+??+????????+????-+?????-?-??????+????+??+???????????-?--+?	0.1426	0.3942	0.06952	0.451	-0.1552	0.6136
	EUR	PP	CURDRINK	MALE	2	163895894	2:163895894:A_G	rs79563921	A	G	397279	289298	7	0.0092	0.5418	??+???????????????-+???????-?????????-???-??????????-??	-0.2645	0.1974	0.1804	0.0101	0.2517	??-???????????????--???????+?????????-???-??????????-??	-1.0513	0.423	0.01293		0.0085	0.3898	??+???????????????-+???????-?????????-???+??????????+??	??-???????????????--???????+?????????-???-??????????-??	0.459	0.337	-1.011	0.3984	-0.1134	0.02074
	EUR	PP	HEAVYvsLIGHT	COMBINED	2	163895894	2:163895894:A_G	rs79563921	A	G	528239	157149	11	0.0085	0.9621	+??+?????????????-+?+??-?-??????????????-+??????????-?-???	-0.186	0.169	0.2709	0.0074	0.02929	-??-?????????????--?+??-?-??????????????--??????????+?+???	-0.4277	0.3422	0.2113		0.0076	0.296	+??+?????????????-+?-??+?-??????????????++??????????-?-???	-??-?????????????--?+??-?-??????????????--??????????+?+???	-0.06993	0.1744	-0.472	0.3413	-0.03037	0.2008
	EUR	PP	HEAVYvsLIGHT	FEMALE	2	163895894	2:163895894:A_G	rs79563921	A	G	206010	60111	7	0.0083	0.725	???+????????++?-??????????????+???????+?-???	0.1968	0.2414	0.4149	0.0069	0.1254	???-????????--?-??????????????+???????+?+???	0.2599	0.5212	0.618		0.0073	0.3011	???+????????++?-??????????????+???????-?-???	???-????????--?-??????????????+???????+?+???	0.1602	0.2551	0.05034	0.5023	-0.06501	0.7444
	EUR	PP	HEAVYvsLIGHT	MALE	2	163895894	2:163895894:A_G	rs79563921	A	G	270384	87397	3	0.0086	0.8696	????????????????-??????????????????-??????????-??	-0.4583	0.2399	0.05612	0.0077	0.03874	????????????????-??????????????????-??????????-??	-1.0996	0.4894	0.02464		0.0079	0.1561	????????????????-??????????????????+??????????-??	????????????????-??????????????????-??????????-??	-0.1427	0.2581	-1.094	0.4874	-0.06648	0.01385
	EUR	PP	HEAVYvsNEVER	COMBINED	2	163895894	2:163895894:A_G	rs79563921	A	G	195504	149658	7	0.0075	0.5009	+-?????-???+?-????-?????+???	0.0384	0.2835	0.8922	0.0084	0.914	--?????-???-?-????-?????-???	-4.3818	0.7441	3.885e-09	0.0479314	0.0072	0.03324	+-?????+???+?-????+?????+???	--?????-???-?-????-?????-???	2.054	0.529	-2.692	0.6154	-0.2796	0.0001235
	EUR	PP	HEAVYvsNEVER	FEMALE	2	163895894	2:163895894:A_G	rs79563921	A	G	64034	54889	3	0.0072	0.3217	?-??+????????????+???	0.5139	0.4527	0.2563	0.008	0.6197	?+??-????????????-???	-3.0296	1.5976	0.05792		0.007	0.1854	?-??+????????????+???	?+??-????????????-???	1.135	0.994	-0.7566	1.104	-0.988	0.4004
	EUR	PP	HEAVYvsNEVER	MALE	2	163895894	2:163895894:A_G	rs79563921	A	G	106869	87501	3	0.0074	0.7403	????-?????????-????-?	-0.3176	0.3801	0.4035	0.0084	0.1488	????-?????????-????-?	-5.5795	0.9794	1.221e-08		0.0069	0.02349	????+?????????+????+?	????-?????????-????-?	3.367	0.8119	-4.631	0.9129	-0.6586	2.734e-06
	EUR	PP	LIGHTvsNEVER	COMBINED	2	163895894	2:163895894:A_G	rs79563921	A	G	386158	338140	10	0.0094	0.7476	??++?????+???+?-?++?+?????-?+?	0.2571	0.1921	0.1809	0.0104	0.04105	??-+?????-???-?-?+-?-?????-?+?	-1.8192	0.5659	0.001305		0.0081	0.1996	??+-?????+???+?-?-+?+?????+?-?	??-+?????-???-?-?+-?-?????-?+?	1.721	0.4894	-1.684	0.5255	-0.2394	0.003704
	EUR	PP	LIGHTvsNEVER	FEMALE	2	163895894	2:163895894:A_G	rs79563921	A	G	155666	134018	8	0.0089	0.4951	??++???+???-?-??+???????-?+?	0.1964	0.2784	0.4805	0.0103	0.08686	??-+???+???-?-??+???????-?+?	-0.5517	0.8563	0.5194		0.0076	0.168	??+-???+???+?+??+???????+?-?	??-+???+???-?-??+???????-?+?	0.7338	0.6875	-0.6247	0.7458	-0.4724	0.5475
	EUR	PP	LIGHTvsNEVER	MALE	2	163895894	2:163895894:A_G	rs79563921	A	G	207453	185069	4	0.0092	0.8437	??????+?????-????+?????-?	0.1546	0.2634	0.5572	0.0097	0.03296	??????-?????+????-?????-?	-3.1711	0.8455	0.0001766		0.0085	0.1152	??????+?????-????+?????+?	??????-?????+????-?????-?	2.87	0.7949	-3.003	0.8371	-0.6315	0.001916
	EUR	SBP	CURDRINK	COMBINED	2	163895894	2:163895894:A_G	rs79563921	A	G	716821	541294	21	0.0098	0.9209	??+??+??????++-+???++?+-???+?+????-?-????-???+??-????????-?+++?	0.1533	0.2082	0.4617	0.0107	0.5333	??+??+??????----???-+?-+???-?-????+?+????+???-??+????????-?--+?	-1.1543	0.4235	0.006417		0.0083	0.8572	??+??+??????++++???++?+-???+?+????-?-????-???+??-????????+?++-?	??+??+??????----???-+?-+???-?-????+?+????+???-??+????????-?--+?	0.9079	0.3328	-1.067	0.3955	-0.1106	0.03523
	EUR	SBP	CURDRINK	FEMALE	2	163895894	2:163895894:A_G	rs79563921	A	G	277357	222467	14	0.0094	0.9224	??+??+????????-????++?????-?+??????-????+??+???????????+?+++?	0.4113	0.309	0.1831	0.0104	0.2993	??+??+????????-????-+?????-?-??????+????+??+???????????-?--+?	0.2117	0.7301	0.7719		0.0078	0.684	??-??-????????-????+-?????-?+??????-????-??-???????????+?++-?	??+??+????????-????-+?????-?-??????+????+??+???????????-?--+?	0.4424	0.572	-0.02178	0.6563	-0.3268	0.3578
	EUR	SBP	CURDRINK	MALE	2	163895894	2:163895894:A_G	rs79563921	A	G	397279	289298	7	0.0095	0.1948	??-???????????????-+???????-?????????-???+??????????-??	-0.0826	0.2724	0.7617	0.0103	0.9811	??-???????????????--???????-?????????+???-??????????-??	-1.8175	0.559	0.001148		0.0085	0.7216	??+???????????????++???????-?????????-???+??????????+??	??-???????????????--???????-?????????+???-??????????-??	1.171	0.4429	-1.813	0.5317	-0.1957	0.005495
	EUR	SBP	HEAVYvsLIGHT	COMBINED	2	163895894	2:163895894:A_G	rs79563921	A	G	528240	157149	11	0.0088	0.8219	+??+?????????????-+?+??+?+??????????????-+??????????-?-???	-0.1302	0.2485	0.6003	0.0075	0.3093	-??-?????????????+-?+??+?-??????????????--??????????+?+???	-0.3308	0.4992	0.5076		0.0076	0.6677	+??+?????????????-+?-??+?+??????????????-+??????????-?-???	-??-?????????????+-?+??+?-??????????????--??????????+?+???	-0.01781	0.2488	-0.5829	0.4988	-0.0618	0.4228
	EUR	SBP	HEAVYvsLIGHT	FEMALE	2	163895894	2:163895894:A_G	rs79563921	A	G	206011	60111	7	0.0085	0.7497	???+????????++?+??????????????+???????+?-???	0.3491	0.3638	0.3373	0.007	0.1802	???-????????--?-??????????????+???????+?+???	0.2197	0.7807	0.7784		0.0073	0.3915	???+????????++?+??????????????+???????-?-???	???-????????--?-??????????????+???????+?+???	0.2916	0.3741	-0.04553	0.7511	-0.1398	0.7075
	EUR	SBP	HEAVYvsLIGHT	MALE	2	163895894	2:163895894:A_G	rs79563921	A	G	270384	87397	3	0.009	0.2648	????????????????+??????????????????-??????????-??	-0.5519	0.3357	0.1002	0.008	0.1203	????????????????-??????????????????-??????????+??	-1.2073	0.6938	0.08185		0.0079	0.2046	????????????????+??????????????????-??????????-??	????????????????-??????????????????-??????????+??	-0.1781	0.3554	-1.391	0.6913	-0.126	0.03656
	EUR	SBP	HEAVYvsNEVER	COMBINED	2	163895894	2:163895894:A_G	rs79563921	A	G	195504	149658	7	0.0078	0.5127	+-?????-???+?+????-?????+???	0.0198	0.4026	0.9609	0.0086	0.8965	--?????-???-?-????-?????-???	-4.0763	1.008	5.247e-05		0.0072	0.4121	+-?????+???+?+????+?????+???	--?????-???-?-????-?????-???	1.96	0.687	-2.734	0.8219	-0.4716	0.005934
	EUR	SBP	HEAVYvsNEVER	FEMALE	2	163895894	2:163895894:A_G	rs79563921	A	G	64034	54889	3	0.0073	0.413	?-??-????????????+???	0.3392	0.6611	0.6079	0.0081	0.6936	?-??-????????????-???	-4.0851	2.2146	0.06509		0.007	0.224	?-??-????????????+???	?-??-????????????-???	0.7308	1.34	-0.4892	1.518	-1.795	0.8205
	EUR	SBP	HEAVYvsNEVER	MALE	2	163895894	2:163895894:A_G	rs79563921	A	G	106869	87501	3	0.0077	0.7324	????+?????????-????-?	-0.5367	0.5387	0.3192	0.0087	0.822	????-?????????-????-?	-5.6086	1.3172	2.062e-05		0.0069	0.3129	????+?????????+????+?	????-?????????-????-?	3.111	1.088	-4.678	1.238	-1.183	0.0006658
	EUR	SBP	LIGHTvsNEVER	COMBINED	2	163895894	2:163895894:A_G	rs79563921	A	G	386158	338140	10	0.0096	0.6552	??++?????+???+?+?--?+?????-?-?	0.2002	0.2703	0.459	0.0105	0.1501	??-+?????+???-?-?++?-?????-?+?	-1.5529	0.7512	0.0387		0.0081	0.3753	??+-?????+???+?+?--?+?????+?-?	??-+?????+???-?-?++?-?????-?+?	1.474	0.6474	-1.473	0.6991	-0.4189	0.1001
	EUR	SBP	LIGHTvsNEVER	FEMALE	2	163895894	2:163895894:A_G	rs79563921	A	G	155666	134018	8	0.0092	0.4608	??++???+???-?+??+???????-?-?	0.3518	0.401	0.3803	0.0106	0.3412	??++???+???-?-??+???????-?+?	0.4119	1.155	0.7213		0.0076	0.4027	??+-???-???-?+??-???????+?-?	??++???+???-?-??+???????-?+?	0.7857	0.9139	-0.4905	1.003	-0.8347	0.5602
	EUR	SBP	LIGHTvsNEVER	MALE	2	163895894	2:163895894:A_G	rs79563921	A	G	207453	185069	4	0.0096	0.2307	??????+?????-????+?????-?	0.0635	0.359	0.8596	0.0099	0.3381	??????-?????-????-?????-?	-3.024	1.1031	0.00612		0.0085	0.1702	??????+?????-????+?????+?	??????-?????-????-?????-?	2.415	1.027	-2.621	1.086	-1.055	0.06474
	EAS	DBP	CURDRINK	COMBINED	3	53789071	3:53789071:C_T	rs3774602	T	C	177130	76414	13	0.3472	0.9085	-+-----++++--	-0.2005	0.0448	7.557e-06	0.3465	0.172	+-++-+----+-+	0.2374	0.0849	0.00516		0.3491	0.5036	-+-----++++--	+-++-+----+-+	-0.2879	0.05432	0.2148	0.08431	-0.00295	1.217e-06
	EAS	DBP	CURDRINK	FEMALE	3	53789071	3:53789071:C_T	rs3774602	T	C	81738	20010	4	0.3377	0.5986	---+	-0.3759	0.06284	2.211e-09	0.3426	0.7913	+-+-	0.1572	0.1435	0.2732		0.3409	0.8386	---+	+-+-	-0.4143	0.06826	0.1707	0.1422	-0.004656	3.321e-09
	EAS	DBP	CURDRINK	MALE	3	53789071	3:53789071:C_T	rs3774602	T	C	89760	55949	11	0.3532	0.8774	--++-+--++-	-0.0345	0.06074	0.5696	0.3524	0.4507	+-+++++--++	0.1331	0.1208	0.2705		0.3549	0.7305	-+++-+--++-	+-+++++--++	-0.116	0.09417	0.1299	0.1197	-0.008866	0.4726
	EAS	DBP	HEAVYvsLIGHT	COMBINED	3	53789071	3:53789071:C_T	rs3774602	T	C	75172	25476	5	0.3503	0.8729	-+-+-	-0.0614	0.06669	0.357	0.3512	0.6839	-+++-	-0.0552	0.1353	0.6833		0.3528	0.9003	---++	-+++-	-0.03978	0.07821	-0.06793	0.1354	-0.006116	0.5559
	EAS	DBP	HEAVYvsLIGHT	FEMALE	3	53789071	3:53789071:C_T	rs3774602	T	C	19857	5810	3	0.347	0.7107	--+	-0.2323	0.126	0.06518	0.3531	0.7396	---	-0.3462	0.2877	0.2288		0.3505	0.8725	--+	---	-0.1222	0.1463	-0.3728	0.2778	-0.02139	0.08195
	EAS	DBP	HEAVYvsLIGHT	MALE	3	53789071	3:53789071:C_T	rs3774602	T	C	55204	19656	5	0.3512	0.7482	-+-+-	0.0116	0.07642	0.8796	0.3512	0.9385	-+++-	0.0216	0.1533	0.8881		0.3535	0.933	-+-+-	-+++-	0.003123	0.09183	0.02161	0.1541	-0.008431	0.9801
	EAS	DBP	HEAVYvsNEVER	COMBINED	3	53789071	3:53789071:C_T	rs3774602	T	C	103581	25378	5	0.3404	0.9055	-+---	-0.2738	0.05645	1.255e-06	0.3491	0.1866	+-++-	0.2064	0.1331	0.1209		0.3431	0.4975	-+---	+-++-	-0.319	0.0615	0.1997	0.1287	-0.003781	1.363e-06
	EAS	DBP	HEAVYvsNEVER	FEMALE	3	53789071	3:53789071:C_T	rs3774602	T	C	64036	5810	3	0.3354	0.9434	---	-0.412	0.06961	3.177e-09	0.3537	0.7476	---	-0.1223	0.2589	0.6367		0.3384	0.9449	--+	---	-0.4007	0.07129	-0.09831	0.2509	-0.00508	1.969e-08
	EAS	DBP	HEAVYvsNEVER	MALE	3	53789071	3:53789071:C_T	rs3774602	T	C	38850	19542	5	0.3486	0.4395	--++-	-0.0147	0.09028	0.8703	0.3485	0.3796	+-+++	0.1391	0.1791	0.4374		0.3511	0.3562	-+++-	+-+++	-0.07101	0.1231	0.1001	0.1755	-0.01514	0.8266
	EAS	DBP	LIGHTvsNEVER	COMBINED	3	53789071	3:53789071:C_T	rs3774602	T	C	129493	49541	7	0.3428	0.4552	---+---	-0.2153	0.05091	2.307e-05	0.344	0.4512	++--+-+	0.2811	0.1008	0.005299		0.3451	0.5314	---+---	++--+-+	-0.3152	0.05988	0.2785	0.09921	-0.003584	1.776e-06
	EAS	DBP	LIGHTvsNEVER	FEMALE	3	53789071	3:53789071:C_T	rs3774602	T	C	72273	14047	3	0.3358	0.3499	--+	-0.3495	0.06556	9.964e-08	0.3403	0.8785	++-	0.2563	0.1629	0.1158		0.3387	0.8406	--+	++-	-0.4014	0.06911	0.2833	0.1613	-0.004773	5.882e-08
	EAS	DBP	LIGHTvsNEVER	MALE	3	53789071	3:53789071:C_T	rs3774602	T	C	55079	35272	5	0.3499	0.9044	-+---	-0.0248	0.07503	0.7413	0.3469	0.9064	++-++	0.1251	0.1552	0.4202		0.3519	0.9733	-+---	++-++	-0.09252	0.1204	0.1066	0.1518	-0.01449	0.7402
	EAS	PP	CURDRINK	COMBINED	3	53789071	3:53789071:C_T	rs3774602	T	C	177104	76405	13	0.3425	0.9295	-+--+--++-+-+	-0.1524	0.04436	0.0005978	0.3423	0.7653	+++-+++--+-+-	0.2458	0.0864	0.004419		0.3491	0.9453	-+-+---++-+-+	+++-+++--+-+-	-0.2462	0.05403	0.239	0.08535	-0.002918	5.04e-05
	EAS	PP	CURDRINK	FEMALE	3	53789071	3:53789071:C_T	rs3774602	T	C	81728	20006	4	0.3341	0.456	---+	-0.2168	0.06083	0.0003653	0.3389	0.6799	+++-	0.2712	0.1448	0.06098		0.3409	0.6509	---+	+++-	-0.2748	0.06562	0.2667	0.1406	-0.004302	0.0001572
	EAS	PP	CURDRINK	MALE	3	53789071	3:53789071:C_T	rs3774602	T	C	89749	55944	11	0.3493	0.7516	-+-+--+-+++	-0.0847	0.0626	0.1764	0.3483	0.6834	+++-++----+	0.2256	0.1267	0.07504		0.3549	0.6788	-+-+--++++-	+++-++----+	-0.2064	0.09808	0.1948	0.1247	-0.009617	0.1155
	EAS	PP	HEAVYvsLIGHT	COMBINED	3	53789071	3:53789071:C_T	rs3774602	T	C	75163	25474	5	0.3467	0.9443	+-+-+	-0.006	0.06612	0.9275	0.348	0.4944	-+---	-0.1805	0.1354	0.1826		0.3528	0.8259	+-+++	-+---	0.05537	0.0777	-0.1812	0.1357	-0.006036	0.4183
	EAS	PP	HEAVYvsLIGHT	FEMALE	3	53789071	3:53789071:C_T	rs3774602	T	C	19853	5808	3	0.3437	0.9359	-++	0.0099	0.1188	0.9333	0.3492	0.4232	---	-0.5413	0.2775	0.05115		0.3505	0.7238	+++	---	0.1508	0.137	-0.531	0.2672	-0.01876	0.1452
	EAS	PP	HEAVYvsLIGHT	MALE	3	53789071	3:53789071:C_T	rs3774602	T	C	55199	19656	5	0.348	0.9628	+-+-+	-0.0152	0.07736	0.8437	0.3483	0.717	++---	-0.0362	0.1571	0.8177		0.3536	0.9485	--+++	++---	-0.002394	0.0935	-0.03989	0.1575	-0.008741	0.9462
	EAS	PP	HEAVYvsNEVER	COMBINED	3	53789071	3:53789071:C_T	rs3774602	T	C	103571	25376	5	0.3362	0.8322	-+---	-0.2652	0.05534	1.625e-06	0.3447	0.5825	++++-	0.2069	0.1364	0.1293		0.3431	0.8285	-----	++++-	-0.3019	0.05962	0.1837	0.1312	-0.003553	2.093e-06
	EAS	PP	HEAVYvsNEVER	FEMALE	3	53789071	3:53789071:C_T	rs3774602	T	C	64028	5808	3	0.3315	0.5903	---	-0.2823	0.06765	3.023e-05	0.3485	0.3569	-+-	-0.0349	0.2683	0.8964		0.3384	0.5583	--+	-+-	-0.2737	0.06767	-0.09778	0.2595	-0.004578	9.374e-05
	EAS	PP	HEAVYvsNEVER	MALE	3	53789071	3:53789071:C_T	rs3774602	T	C	38848	19542	5	0.3446	0.6218	-+---	-0.2037	0.09154	0.02607	0.3445	0.6986	+++++	0.3305	0.185	0.07396		0.3511	0.8074	-+---	+++++	-0.3768	0.1239	0.3509	0.1804	-0.01536	0.01009
	EAS	PP	LIGHTvsNEVER	COMBINED	3	53789071	3:53789071:C_T	rs3774602	T	C	129474	49534	7	0.3386	0.6014	---++++	-0.1734	0.0499	0.0005076	0.3403	0.8248	+++--++	0.3643	0.1022	0.0003637		0.3451	0.7588	---+++-	+++--++	-0.2895	0.0587	0.3422	0.09985	-0.003444	6.342e-06
	EAS	PP	LIGHTvsNEVER	FEMALE	3	53789071	3:53789071:C_T	rs3774602	T	C	72265	14045	3	0.3322	0.2713	--+	-0.2011	0.06363	0.001585	0.3365	0.4463	++-	0.3944	0.1644	0.01644		0.3387	0.5069	--+	++-	-0.274	0.06701	0.4121	0.1601	-0.004487	0.0001489
	EAS	PP	LIGHTvsNEVER	MALE	3	53789071	3:53789071:C_T	rs3774602	T	C	55070	35267	5	0.3461	0.613	--+++	-0.1304	0.07672	0.08926	0.343	0.7017	++--+	0.3767	0.159	0.01779		0.3519	0.6368	--++-	++--+	-0.3328	0.1209	0.3278	0.1544	-0.01461	0.02463
	EAS	SBP	CURDRINK	COMBINED	3	53789071	3:53789071:C_T	rs3774602	T	C	177153	76420	13	0.3458	0.8697	-+-----++-+-+	-0.3557	0.07108	5.666e-07	0.3454	0.6723	+-+++++---+++	0.498	0.1325	0.0001707		0.3491	0.868	-+-----++-+--	+-+++++---+++	-0.5462	0.08492	0.4702	0.1322	-0.007208	4.519e-09
	EAS	SBP	CURDRINK	FEMALE	3	53789071	3:53789071:C_T	rs3774602	T	C	81733	20008	4	0.3372	0.3442	---+	-0.5972	0.09912	1.698e-09	0.3421	0.7106	+-+-	0.4349	0.2251	0.05336		0.341	0.5939	---+	+-+-	-0.6967	0.1056	0.4423	0.221	-0.01115	3.533e-10
	EAS	SBP	CURDRINK	MALE	3	53789071	3:53789071:C_T	rs3774602	T	C	89776	55955	11	0.352	0.8987	-+++--+-++-	-0.1151	0.09522	0.2268	0.3511	0.7737	+-+-++---++	0.3597	0.1889	0.0569		0.3549	0.8709	-+-+--+-++-	+-+-++---++	-0.3207	0.1469	0.3285	0.1868	-0.02158	0.1026
	EAS	SBP	HEAVYvsLIGHT	COMBINED	3	53789071	3:53789071:C_T	rs3774602	T	C	75169	25478	5	0.3492	0.9731	--+-+	-0.0652	0.1031	0.5273	0.3506	0.5526	-++--	-0.2216	0.2069	0.284		0.3529	0.8967	--+++	-++--	0.01375	0.12	-0.2353	0.2079	-0.0144	0.4359
	EAS	SBP	HEAVYvsLIGHT	FEMALE	3	53789071	3:53789071:C_T	rs3774602	T	C	19855	5809	3	0.3468	0.7457	--+	-0.2265	0.1899	0.2332	0.3527	0.6477	---	-0.9066	0.4387	0.03879		0.3505	0.8481	--+	---	0.03349	0.2223	-0.919	0.4223	-0.04943	0.0499
	EAS	SBP	HEAVYvsLIGHT	MALE	3	53789071	3:53789071:C_T	rs3774602	T	C	55203	19659	5	0.3503	0.992	-+-++	0.0002	0.1179	0.9986	0.3506	0.8731	+++--	0.0081	0.2349	0.9723		0.3536	0.9892	-+-++	+++--	-0.003375	0.141	0.003782	0.2367	-0.01989	0.9997
	EAS	SBP	HEAVYvsNEVER	COMBINED	3	53789071	3:53789071:C_T	rs3774602	T	C	103579	25380	5	0.3395	0.8362	-+---	-0.5414	0.08943	1.412e-09	0.348	0.5326	+-++-	0.443	0.2072	0.03248		0.3431	0.7809	-+---	+-++-	-0.631	0.09519	0.4098	0.2014	-0.009057	3.703e-10
	EAS	SBP	HEAVYvsNEVER	FEMALE	3	53789071	3:53789071:C_T	rs3774602	T	C	64032	5809	3	0.3346	0.8632	---	-0.7059	0.1102	1.453e-10	0.3525	0.454	---	-0.1621	0.4059	0.6896		0.3384	0.7697	--+	---	-0.6861	0.1103	-0.2018	0.3933	-0.01215	3.706e-10
	EAS	SBP	HEAVYvsNEVER	MALE	3	53789071	3:53789071:C_T	rs3774602	T	C	38852	19545	5	0.3475	0.6994	-++--	-0.2034	0.1405	0.1477	0.3474	0.6129	+-+++	0.4998	0.2788	0.07295		0.3511	0.7329	-+---	+-+++	-0.4503	0.1905	0.4762	0.2729	-0.03628	0.0639
	EAS	SBP	LIGHTvsNEVER	COMBINED	3	53789071	3:53789071:C_T	rs3774602	T	C	129511	49545	7	0.3419	0.4061	---++-+	-0.3927	0.08017	9.822e-07	0.3433	0.8463	+++-+++	0.6583	0.1577	2.987e-05	0.00473191	0.3451	0.7029	---+---	+++-+++	-0.6173	0.09306	0.6326	0.155	-0.008656	1.085e-09
	EAS	SBP	LIGHTvsNEVER	FEMALE	3	53789071	3:53789071:C_T	rs3774602	T	C	72269	14046	3	0.3352	0.1549	--+	-0.5539	0.1033	8.27e-08	0.3398	0.7514	++-	0.6729	0.2561	0.00859		0.3387	0.6021	--+	++-	-0.6849	0.107	0.7162	0.2505	-0.01143	2.278e-09
	EAS	SBP	LIGHTvsNEVER	MALE	3	53789071	3:53789071:C_T	rs3774602	T	C	55092	35275	5	0.3489	0.9376	--++-	-0.1548	0.1171	0.1861	0.3458	0.8125	++-++	0.4997	0.2412	0.03825		0.352	0.909	--++-	++-++	-0.429	0.1855	0.4351	0.2348	-0.03441	0.07428
	ALL	DBP	CURDRINK	COMBINED	4	62940142	4:62940142:A_C	rs137958729	A	C	763079	553477	3	0.004	0.7698	??+-+?	0.0598	0.1908	0.754	0.0041	0.01232	??+-+?	-0.1198	0.4067	0.7683		0.0034	0.08403	??-+-?	??+-+?	0.1623	0.3228	-0.1821	0.3879	-0.1041	0.8775
	ALL	DBP	CURDRINK	FEMALE	4	62940142	4:62940142:A_C	rs137958729	A	C	235273	183320	2	0.0039	0.9837	??--??	-0.5142	0.3194	0.1074	0.0044	0.7087	??++??	0.7644	0.8087	0.3445		0.0036	0.7571	??--??	??+-??	-0.6368	0.6178	0.1698	0.7106	-0.3816	0.2433
	ALL	DBP	CURDRINK	MALE	4	62940142	4:62940142:A_C	rs137958729	A	C	434115	305227	3	0.0038	0.5533	??+++?	0.1907	0.2429	0.4324	0.0039	0.1452	??+-+?	-0.4243	0.5149	0.4099		0.0034	0.4045	??++-?	??+-+?	0.353	0.4164	-0.2599	0.5009	-0.1731	0.6608
	ALL	DBP	HEAVYvsLIGHT	COMBINED	4	62940142	4:62940142:A_C	rs137958729	A	C	487667	158618	2	0.0047	0.2786	?+-??	-0.2577	0.2032	0.2046	0.0037	0.7591	?--??	-0.2497	0.4366	0.5674		0.0036	0.4982	?+-??	?--??	-0.2028	0.2205	-0.1914	0.4448	-0.04857	0.3894
	ALL	DBP	HEAVYvsLIGHT	FEMALE	4	62940142	4:62940142:A_C	rs137958729	A	C	156945	56420	2	0.0034	0.4731	?+-??	-0.595	0.3998	0.1366	0.0033	0.5473	?-+??	0.1779	0.737	0.8093		0.0033	0.6539	?+-??	?-+??	-0.6582	0.4674	0.1661	0.7859	-0.2184	0.2741
	ALL	DBP	HEAVYvsLIGHT	MALE	4	62940142	4:62940142:A_C	rs137958729	A	C	292000	98609	2	0.0033	0.3482	?+-??	-0.0819	0.2992	0.7843	0.0033	0.8041	?--??	-0.5894	0.5855	0.3141		0.0033	0.6231	?+-??	?--??	0.03712	0.3475	-0.3261	0.6054	-0.1207	0.839
	ALL	DBP	HEAVYvsNEVER	COMBINED	4	62940142	4:62940142:A_C	rs137958729	A	C	207569	156288	2	0.0037	0.4311	?+-??	-0.3057	0.3506	0.3833	0.0041	0.8333	?--??	-0.3341	0.8716	0.7015		0.0037	0.8023	?+-??	?-+??	-0.07661	0.6596	-0.3082	0.7679	-0.4354	0.614
	ALL	DBP	HEAVYvsNEVER	FEMALE	4	62940142	4:62940142:A_C	rs137958729	A	C	78774	56420	2	0.004	0.9021	?--??	-0.6808	0.5397	0.2072	0.0046	0.6509	?++??	1.0578	1.7531	0.5463		0.004	0.8531	?--??	?++??	-1.054	0.9637	0.5735	1.151	-0.9288	0.4107
	ALL	DBP	HEAVYvsNEVER	MALE	4	62940142	4:62940142:A_C	rs137958729	A	C	126556	98713	2	0.0035	0.2189	?+-??	0.0191	0.4385	0.9652	0.0037	0.9369	?--??	-1.1169	1.0638	0.2937		0.0034	0.5127	?++??	?--??	0.7306	0.8971	-0.943	1.021	-0.8046	0.6528
	ALL	DBP	LIGHTvsNEVER	COMBINED	4	62940142	4:62940142:A_C	rs137958729	A	C	356777	303261	3	0.0038	0.04868	?+-+?	-0.0471	0.2685	0.8607	0.0046	0.912	?++-?	0.1997	0.7252	0.783		0.0035	0.2499	?+-+?	?++-?	0.2635	0.6087	-0.4066	0.671	-0.37	0.8015
	ALL	DBP	LIGHTvsNEVER	FEMALE	4	62940142	4:62940142:A_C	rs137958729	A	C	122879	100525	2	0.0039	0.6848	?--??	-0.7465	0.4435	0.09234	0.0049	0.941	?++??	1.701	1.5345	0.2677		0.0038	0.5532	?--??	?++??	-1.102	0.9628	0.4481	1.074	-0.9269	0.2026
	ALL	DBP	LIGHTvsNEVER	MALE	4	62940142	4:62940142:A_C	rs137958729	A	C	221232	193433	2	0.0035	0.2125	?+-??	0.1229	0.3364	0.7149	0.0039	0.6577	?--??	-0.4737	0.9655	0.6237		0.0034	0.4887	?++??	?--??	0.6801	0.9044	-0.6428	0.9692	-0.8172	0.7495
	ALL	PP	CURDRINK	COMBINED	4	62940142	4:62940142:A_C	rs137958729	A	C	763053	553462	3	0.004	0.8606	??---?	-0.0872	0.2212	0.6933	0.0042	0.7711	??+++?	1.7225	0.4843	0.0003757		0.0034	0.9499	??---?	??+++?	-1.051	0.3778	1.404	0.4537	-0.1426	0.007758
	ALL	PP	CURDRINK	FEMALE	4	62940142	4:62940142:A_C	rs137958729	A	C	235260	183314	2	0.0038	0.04628	??-+??	0.0654	0.3535	0.8533	0.0042	0.296	??++??	1.4535	0.9122	0.1111		0.0036	0.1914	??--??	??++??	-1.117	0.691	1.579	0.7937	-0.4773	0.1346
	ALL	PP	CURDRINK	MALE	4	62940142	4:62940142:A_C	rs137958729	A	C	434102	305218	3	0.004	0.8435	??+--?	0.047	0.2948	0.8734	0.0042	0.1589	??+++?	2.0936	0.6416	0.001103		0.0034	0.5803	??---?	??+++?	-1.19	0.5163	1.767	0.6172	-0.2662	0.01642
	ALL	PP	HEAVYvsLIGHT	COMBINED	4	62940142	4:62940142:A_C	rs137958729	A	C	487652	158614	2	0.0047	0.7062	?++??	0.3097	0.2381	0.1932	0.0037	0.3116	?++??	1.0955	0.5092	0.03144		0.0036	0.6155	?-+??	?++??	0.02012	0.2623	1.154	0.5173	-0.06877	0.03117
	ALL	PP	HEAVYvsLIGHT	FEMALE	4	62940142	4:62940142:A_C	rs137958729	A	C	156939	56418	2	0.0034	0.9172	?++??	0.3839	0.4355	0.378	0.0034	0.8404	?++??	0.9573	0.8231	0.2448		0.0033	0.9786	?-+??	?++??	0.05324	0.5159	0.9627	0.8672	-0.2661	0.3439
	ALL	PP	HEAVYvsLIGHT	MALE	4	62940142	4:62940142:A_C	rs137958729	A	C	291991	98607	2	0.0034	0.9926	?++??	0.6403	0.3585	0.07409	0.0034	0.256	?++??	1.0627	0.697	0.1273		0.0033	0.4777	?-+??	?++??	0.3086	0.4195	0.9316	0.7202	-0.1759	0.081
	ALL	PP	HEAVYvsNEVER	COMBINED	4	62940142	4:62940142:A_C	rs137958729	A	C	207557	156284	2	0.0038	0.2388	?-+??	-0.1729	0.4077	0.6714	0.0042	0.3248	?++??	6.0116	1.0392	7.254e-09	0.0375666	0.0037	0.1725	?--??	?++??	-3.71	0.7618	4.862	0.8934	-0.5804	3.366e-07
	ALL	PP	HEAVYvsNEVER	FEMALE	4	62940142	4:62940142:A_C	rs137958729	A	C	78766	56418	2	0.004	0.01142	?-+??	-0.2281	0.6075	0.7073	0.0046	0.5321	?++??	3.4751	1.9747	0.07844		0.004	0.7835	?--??	?++??	-3.011	1.079	4.025	1.292	-1.163	0.007377
	ALL	PP	HEAVYvsNEVER	MALE	4	62940142	4:62940142:A_C	rs137958729	A	C	126552	98711	2	0.0035	0.3884	?+-??	-0.0854	0.523	0.8703	0.0039	0.1742	?++??	6.6019	1.3042	4.147e-07		0.0034	0.067	?--??	?++??	-4.456	1.084	5.634	1.234	-1.174	2.891e-05
	ALL	PP	LIGHTvsNEVER	COMBINED	4	62940142	4:62940142:A_C	rs137958729	A	C	356758	303250	3	0.004	0.08137	?--+?	-0.3243	0.3115	0.2979	0.0049	0.1704	?+++?	3.6083	0.8479	2.083e-05		0.0035	0.1161	?---?	?+++?	-2.924	0.6905	3.186	0.7671	-0.4764	9.342e-05
	ALL	PP	LIGHTvsNEVER	FEMALE	4	62940142	4:62940142:A_C	rs137958729	A	C	122869	100521	2	0.0038	0.03301	?-+??	-0.5576	0.4865	0.2518	0.0049	0.5534	?++??	2.5225	1.7232	0.1432		0.0038	0.7767	?--??	?++??	-3.042	1.066	3.094	1.19	-1.136	0.01699
	ALL	PP	LIGHTvsNEVER	MALE	4	62940142	4:62940142:A_C	rs137958729	A	C	221223	193426	2	0.0036	0.5647	?--??	-0.2953	0.4095	0.4708	0.004	0.04097	?++??	4.7024	1.1941	8.22e-05		0.0034	0.1202	?--??	?++??	-4.236	1.095	4.554	1.177	-1.199	0.0004289
	ALL	SBP	CURDRINK	COMBINED	4	62940142	4:62940142:A_C	rs137958729	A	C	763070	553470	3	0.004	0.958	??--+?	-0.0224	0.3216	0.9444	0.0042	0.4331	??+++?	1.7483	0.6765	0.009751		0.0034	0.6971	??---?	??+++?	-0.9687	0.5318	1.377	0.6455	-0.2825	0.1022
	ALL	SBP	CURDRINK	FEMALE	4	62940142	4:62940142:A_C	rs137958729	A	C	235265	183316	2	0.0039	0.1658	??--??	-0.4257	0.5318	0.4234	0.0043	0.3468	??++??	2.2854	1.3266	0.08494		0.0036	0.2913	??--??	??++??	-1.74	1.008	1.791	1.166	-1.016	0.2246
	ALL	SBP	CURDRINK	MALE	4	62940142	4:62940142:A_C	rs137958729	A	C	434112	305224	3	0.004	0.6911	??+++?	0.2568	0.4144	0.5355	0.0041	0.9266	??+++?	1.7718	0.8727	0.04234		0.0034	0.8685	??+--?	??+++?	-0.8577	0.7022	1.608	0.8505	-0.4923	0.1403
	ALL	SBP	HEAVYvsLIGHT	COMBINED	4	62940142	4:62940142:A_C	rs137958729	A	C	487658	158618	2	0.0049	0.3355	?+-??	0.0707	0.3372	0.834	0.0038	0.6212	?++??	0.9123	0.7378	0.2162		0.0036	0.6175	?+-??	?++??	-0.1656	0.3648	1.046	0.7491	-0.1329	0.3651
	ALL	SBP	HEAVYvsLIGHT	FEMALE	4	62940142	4:62940142:A_C	rs137958729	A	C	156941	56419	2	0.0034	0.5921	?+-??	-0.1939	0.6638	0.7702	0.0034	0.7941	?++??	1.1088	1.2332	0.3686		0.0033	0.8545	?+-??	?++??	-0.5808	0.7786	1.103	1.309	-0.6062	0.6695
	ALL	SBP	HEAVYvsLIGHT	MALE	4	62940142	4:62940142:A_C	rs137958729	A	C	291995	98610	2	0.0034	0.5616	?++??	0.6272	0.5138	0.2222	0.0034	0.3454	?++??	0.609	1.003	0.5437		0.0033	0.5536	?++??	?++??	0.374	0.5956	0.73	1.04	-0.3545	0.3555
	ALL	SBP	HEAVYvsNEVER	COMBINED	4	62940142	4:62940142:A_C	rs137958729	A	C	207565	156288	2	0.0037	0.7639	?--??	-0.473	0.5975	0.4286	0.0042	0.518	?++??	5.9082	1.4642	5.457e-05		0.0037	0.2105	?--??	?++??	-3.86	1.086	4.728	1.282	-1.18	0.0008048
	ALL	SBP	HEAVYvsNEVER	FEMALE	4	62940142	4:62940142:A_C	rs137958729	A	C	78770	56419	2	0.0041	0.0701	?-+??	-0.9805	0.9006	0.2763	0.0047	0.88	?++??	4.5556	2.8716	0.1126		0.004	0.989	?--??	?++??	-4.068	1.543	4.603	1.873	-2.382	0.02728
	ALL	SBP	HEAVYvsNEVER	MALE	4	62940142	4:62940142:A_C	rs137958729	A	C	126556	98714	2	0.0036	0.1593	?+-??	-0.0233	0.7513	0.9752	0.0039	0.2889	?++??	5.7138	1.8096	0.001592		0.0034	0.0589	?+-??	?++??	-3.78	1.509	4.891	1.731	-2.277	0.0184
	ALL	SBP	LIGHTvsNEVER	COMBINED	4	62940142	4:62940142:A_C	rs137958729	A	C	356766	303254	3	0.004	0.06407	?--+?	-0.3401	0.4537	0.4535	0.0048	0.3727	?+++?	3.9422	1.196	0.00098		0.0035	0.05097	?--+?	?+++?	-2.703	0.9886	2.873	1.1	-0.9769	0.02235
	ALL	SBP	LIGHTvsNEVER	FEMALE	4	62940142	4:62940142:A_C	rs137958729	A	C	122873	100522	2	0.0039	0.2244	?--??	-1.3606	0.7331	0.06346	0.005	0.6537	?++??	4.2888	2.4928	0.08534		0.0038	0.8367	?--??	?++??	-4.157	1.528	3.569	1.722	-2.337	0.01879
	ALL	SBP	LIGHTvsNEVER	MALE	4	62940142	4:62940142:A_C	rs137958729	A	C	221225	193427	2	0.0036	0.6996	?+-??	-0.1563	0.5778	0.7868	0.004	0.07767	?++??	4.318	1.6388	0.008415		0.0034	0.1387	?+-??	?++??	-3.582	1.52	3.963	1.635	-2.309	0.05093
	ALL	DBP	CURDRINK	COMBINED	4	80261400	4:80261400:C_T	rs12509595	T	C	1146290	765747	6	0.7057	7.725e-11	------	-0.4212	0.0179	5.5e-123	0.7065	0.7	-----+	-0.0764	0.0394	0.05255		0.716	3.806e-11	------	-----+	-0.4019	0.02976	-0.0315	0.03617	-0.0008844	3.53e-136
	ALL	DBP	CURDRINK	FEMALE	4	80261400	4:80261400:C_T	rs12509595	T	C	492399	313919	6	0.7028	0.003296	------	-0.4407	0.0254	3.094e-67	0.7035	0.2092	-----+	-0.1289	0.0637	0.04317		0.7141	0.0002649	+-----	-----+	-0.4108	0.04175	-0.05039	0.05167	-0.001742	2.151e-71
	ALL	DBP	CURDRINK	MALE	4	80261400	4:80261400:C_T	rs12509595	T	C	642901	449349	6	0.708	1.204e-07	------	-0.4042	0.0232	9.24e-68	0.7104	0.9743	-++---	-0.005	0.0525	0.9245		0.7181	2.954e-06	------	-++---	-0.3833	0.04196	-0.03028	0.04966	-0.001759	3.325e-71
	ALL	DBP	HEAVYvsLIGHT	COMBINED	4	80261400	4:80261400:C_T	rs12509595	T	C	749075	208197	5	0.7033	0.0001418	-----	-0.4215	0.0211	1.701e-88	0.705	0.07131	++---	-0.0661	0.0451	0.1424		0.7097	9.132e-05	-----	++---	-0.394	0.02342	-0.1257	0.0461	-0.0005479	3.05e-99
	ALL	DBP	HEAVYvsLIGHT	FEMALE	4	80261400	4:80261400:C_T	rs12509595	T	C	304071	79945	5	0.6998	0.1941	-----	-0.4514	0.0311	9.389e-48	0.705	0.4268	+----	-0.1066	0.0707	0.1312		0.7041	0.3626	-----	+----	-0.4155	0.03436	-0.1626	0.07035	-0.001179	1.082e-51
	ALL	DBP	HEAVYvsLIGHT	MALE	4	80261400	4:80261400:C_T	rs12509595	T	C	436242	126871	5	0.7054	0.001154	-----	-0.4019	0.0273	3.897e-49	0.7046	0.08114	++---	-0.0422	0.059	0.4751		0.7113	0.0008386	-----	++---	-0.3793	0.03107	-0.09936	0.05902	-0.0009641	8.974e-53
	ALL	DBP	HEAVYvsNEVER	COMBINED	4	80261400	4:80261400:C_T	rs12509595	T	C	361992	191958	5	0.7	0.0002036	+----	-0.5169	0.031	2.111e-62	0.6989	0.2199	+--+-	-0.1343	0.0793	0.09045		0.711	2.416e-05	+----	++-+-	-0.4983	0.04415	-0.03516	0.06058	-0.001948	3.318e-64
	ALL	DBP	HEAVYvsNEVER	FEMALE	4	80261400	4:80261400:C_T	rs12509595	T	C	173191	71562	5	0.6938	0.05322	-----	-0.5466	0.0435	3.285e-36	0.7016	0.8888	---+-	-0.4463	0.1419	0.001665		0.7026	0.006623	-----	---+-	-0.5066	0.05633	-0.08928	0.08711	-0.003169	1.098e-35
	ALL	DBP	HEAVYvsNEVER	MALE	4	80261400	4:80261400:C_T	rs12509595	T	C	174524	118953	5	0.7024	0.08455	+----	-0.5202	0.0438	1.662e-32	0.6997	0.3279	++-+-	0.0731	0.1045	0.4844		0.7091	0.08328	-----	++-+-	-0.5809	0.07789	0.09024	0.09346	-0.006063	2.648e-32
	ALL	DBP	LIGHTvsNEVER	COMBINED	4	80261400	4:80261400:C_T	rs12509595	T	C	626342	453106	5	0.7013	8.656e-09	-----	-0.4375	0.0239	1.54e-74	0.699	0.6492	---++	-0.0616	0.0613	0.3151		0.7133	1.808e-07	-----	---++	-0.5047	0.04338	0.09039	0.0512	-0.001881	2.492e-80
	ALL	DBP	LIGHTvsNEVER	FEMALE	4	80261400	4:80261400:C_T	rs12509595	T	C	291455	178576	5	0.6968	0.005793	-----	-0.4742	0.0336	3.641e-45	0.697	0.5546	---++	-0.0999	0.094	0.2879		0.7116	0.002632	+----	----+	-0.4795	0.05263	0.004302	0.06726	-0.002768	1.304e-46
	ALL	DBP	LIGHTvsNEVER	MALE	4	80261400	4:80261400:C_T	rs12509595	T	C	326832	270563	5	0.7045	1.461e-07	-----	-0.4081	0.0324	2.671e-36	0.7015	0.7666	+-++-	0.0708	0.0892	0.4274		0.7143	3.629e-05	-----	++++-	-0.5657	0.07646	0.189	0.08397	-0.005844	4.638e-38
	ALL	PP	CURDRINK	COMBINED	4	80261400	4:80261400:C_T	rs12509595	T	C	1146250	765732	6	0.7019	0.003508	------	-0.2945	0.0204	3.061e-47	0.7026	0.09357	-+---+	-0.108	0.0458	0.0184		0.716	0.0001285	+-----	-+---+	-0.2563	0.03388	-0.0597	0.04143	-0.001147	3.818e-51
	ALL	PP	CURDRINK	FEMALE	4	80261400	4:80261400:C_T	rs12509595	T	C	492386	313913	6	0.6988	0.001936	+-----	-0.3205	0.028	3.006e-30	0.7005	0.0009466	-+--++	-0.1201	0.0711	0.09113		0.7141	4.709e-06	+-----	-+--++	-0.3309	0.04497	0.01197	0.05657	-0.002021	3.76e-31
	ALL	PP	CURDRINK	MALE	4	80261400	4:80261400:C_T	rs12509595	T	C	642885	449340	6	0.7057	0.2073	------	-0.2667	0.0274	1.863e-22	0.7077	0.265	------	-0.1481	0.0633	0.01918		0.7181	0.07434	------	------	-0.1444	0.05058	-0.1719	0.05943	-0.002558	9.277e-25
	ALL	PP	HEAVYvsLIGHT	COMBINED	4	80261400	4:80261400:C_T	rs12509595	T	C	749060	208193	5	0.702	0.05972	-----	-0.3095	0.0239	2.04e-38	0.7036	0.01246	-----	-0.077	0.0513	0.1335		0.7097	0.03757	----+	-----	-0.2764	0.02659	-0.1472	0.05218	-0.0007066	1.739e-43
	ALL	PP	HEAVYvsLIGHT	FEMALE	4	80261400	4:80261400:C_T	rs12509595	T	C	304065	79943	5	0.6993	0.005634	----+	-0.3238	0.034	1.859e-21	0.7044	0.1943	-----	-0.1102	0.0789	0.1626		0.7041	0.01018	---++	-----	-0.2882	0.03809	-0.1521	0.07782	-0.00145	2.798e-22
	ALL	PP	HEAVYvsLIGHT	MALE	4	80261400	4:80261400:C_T	rs12509595	T	C	436233	126869	5	0.7038	0.2836	-----	-0.3077	0.0314	1.102e-22	0.7029	0.03719	--+--	-0.0601	0.0681	0.3774		0.7113	0.2118	-----	-----	-0.2721	0.03584	-0.1488	0.06783	-0.001283	8.233e-25
	ALL	PP	HEAVYvsNEVER	COMBINED	4	80261400	4:80261400:C_T	rs12509595	T	C	361979	191954	5	0.6943	0.002528	+----	-0.3636	0.0343	3.205e-26	0.6947	0.1114	-----	-0.3003	0.0901	0.0008598		0.711	1.947e-05	+----	-----	-0.2852	0.04711	-0.1644	0.06745	-0.002219	1.711e-27
	ALL	PP	HEAVYvsNEVER	FEMALE	4	80261400	4:80261400:C_T	rs12509595	T	C	173183	71560	5	0.6879	0.05155	+----	-0.4037	0.0463	2.816e-18	0.6984	0.3983	----+	-0.5607	0.1587	0.0004114		0.7026	0.001646	+----	----+	-0.3528	0.0572	-0.1467	0.09422	-0.003272	1.173e-18
	ALL	PP	HEAVYvsNEVER	MALE	4	80261400	4:80261400:C_T	rs12509595	T	C	174519	118951	5	0.6994	0.2981	-----	-0.3567	0.0498	7.595e-13	0.6961	0.1384	-----	-0.2686	0.1198	0.02492		0.7091	0.05549	+----	-----	-0.2194	0.08604	-0.2066	0.1052	-0.007399	7.57e-13
	ALL	PP	LIGHTvsNEVER	COMBINED	4	80261400	4:80261400:C_T	rs12509595	T	C	626318	453095	5	0.6962	0.1091	-----	-0.2992	0.0269	7.904e-29	0.6932	0.005965	-+--+	-0.0995	0.0696	0.1528		0.7133	0.003363	+----	-+--+	-0.2964	0.04691	-0.003984	0.05651	-0.002199	4.837e-29
	ALL	PP	LIGHTvsNEVER	FEMALE	4	80261400	4:80261400:C_T	rs12509595	T	C	291445	178572	5	0.691	0.003935	+----	-0.3182	0.0364	2.215e-18	0.6915	0.02872	---++	-0.1847	0.1051	0.07869		0.7115	0.0003016	+----	---++	-0.3303	0.05577	0.016	0.07268	-0.003109	3.37e-18
	ALL	PP	LIGHTvsNEVER	MALE	4	80261400	4:80261400:C_T	rs12509595	T	C	326820	270556	5	0.7016	0.9066	-----	-0.2907	0.0375	8.305e-15	0.6969	0.1404	-+-++	-0.1087	0.1026	0.2894		0.7143	0.5853	+----	-+-++	-0.2349	0.08561	-0.0671	0.0948	-0.007325	2.985e-14
	ALL	SBP	CURDRINK	COMBINED	4	80261400	4:80261400:C_T	rs12509595	T	C	1146350	765772	6	0.7038	3.897e-11	------	-0.6948	0.0298	5.84e-120	0.7046	0.08092	-----+	-0.1909	0.0656	0.003589		0.716	1.298e-13	+-----	-----+	-0.6447	0.0495	-0.08196	0.06028	-0.002447	6.52e-134
	ALL	SBP	CURDRINK	FEMALE	4	80261400	4:80261400:C_T	rs12509595	T	C	492410	313924	6	0.7004	8.294e-06	+-----	-0.7439	0.0418	1.052e-70	0.7013	0.002033	-+--++	-0.2608	0.1041	0.01225		0.7141	7.382e-09	+-----	-+--++	-0.735	0.06828	-0.02395	0.08468	-0.004658	1.684e-75
	ALL	SBP	CURDRINK	MALE	4	80261400	4:80261400:C_T	rs12509595	T	C	642934	449367	6	0.7066	3.008e-05	------	-0.6531	0.039	4.816e-63	0.709	0.6743	--+---	-0.1394	0.0879	0.1129		0.7181	8.391e-05	------	--+---	-0.524	0.07039	-0.1871	0.08333	-0.004951	1.118e-67
	ALL	SBP	HEAVYvsLIGHT	COMBINED	4	80261400	4:80261400:C_T	rs12509595	T	C	749090	208206	5	0.7022	6.178e-05	-----	-0.7063	0.0349	5.92e-91	0.7039	0.1286	+----	-0.1195	0.0752	0.1121		0.7097	0.0005962	-----	+----	-0.6521	0.03834	-0.2632	0.07686	-0.001469	1.81e-104
	ALL	SBP	HEAVYvsLIGHT	FEMALE	4	80261400	4:80261400:C_T	rs12509595	T	C	304069	79945	5	0.6988	0.002502	-----	-0.7531	0.0502	6.327e-51	0.7045	0.2392	-----	-0.2125	0.1171	0.06958		0.7041	0.01581	----+	-----	-0.6834	0.05554	-0.3213	0.1157	-0.003082	7.562e-55
	ALL	SBP	HEAVYvsLIGHT	MALE	4	80261400	4:80261400:C_T	rs12509595	T	C	436252	126879	5	0.7042	0.01139	-----	-0.6872	0.0452	3.412e-52	0.7033	0.4133	+----	-0.0613	0.0988	0.5351		0.7113	0.06746	-----	+----	-0.6399	0.05115	-0.2198	0.09884	-0.002613	4.369e-57
	ALL	SBP	HEAVYvsNEVER	COMBINED	4	80261400	4:80261400:C_T	rs12509595	T	C	361991	191959	5	0.6978	8.999e-07	+----	-0.857	0.0513	1.383e-62	0.6967	0.6982	-----	-0.4098	0.1301	0.001635		0.711	1.41e-08	+----	-----	-0.761	0.07064	-0.1983	0.1001	-0.004984	1.512e-65
	ALL	SBP	HEAVYvsNEVER	FEMALE	4	80261400	4:80261400:C_T	rs12509595	T	C	173189	71562	5	0.6916	0.004165	+----	-0.9429	0.0707	1.332e-40	0.6998	0.8649	-----	-1.0078	0.2314	1.325e-05	0.03988	0.7026	5.46e-05	+----	-----	-0.8442	0.08872	-0.2541	0.1426	-0.007865	2.224e-41
	ALL	SBP	HEAVYvsNEVER	MALE	4	80261400	4:80261400:C_T	rs12509595	T	C	174523	118954	5	0.7009	0.04726	+----	-0.8443	0.0724	2.174e-31	0.6979	0.7501	-----	-0.1595	0.1717	0.3532		0.7091	0.06931	+----	-+---	-0.771	0.1238	-0.1094	0.1518	-0.01531	6.993e-31
	ALL	SBP	LIGHTvsNEVER	COMBINED	4	80261400	4:80261400:C_T	rs12509595	T	C	626364	453112	5	0.6989	7.988e-07	-----	-0.7274	0.0397	6.019e-75	0.6963	0.05183	----+	-0.1984	0.1004	0.04803		0.7133	4.899e-08	+----	-+-++	-0.7815	0.07043	0.07148	0.08391	-0.004956	8.952e-80
	ALL	SBP	LIGHTvsNEVER	FEMALE	4	80261400	4:80261400:C_T	rs12509595	T	C	291452	178574	5	0.6933	5.848e-05	+----	-0.7835	0.0549	2.945e-46	0.6936	0.01429	---++	-0.3444	0.1528	0.02424		0.7116	3.979e-07	+----	---++	-0.7893	0.08487	-0.001494	0.1092	-0.007195	4.751e-48
	ALL	SBP	LIGHTvsNEVER	MALE	4	80261400	4:80261400:C_T	rs12509595	T	C	326847	270569	5	0.7029	0.004129	-----	-0.6965	0.0539	3.386e-38	0.6996	0.7999	-+-++	-0.0369	0.1461	0.8005		0.7143	0.04139	-----	-+-++	-0.7978	0.1235	0.1216	0.1365	-0.01526	4.271e-39
	ALL	DBP	CURDRINK	COMBINED	4	99318162	4:99318162:C_T	rs1229984	T	C	1078660	731471	6	0.4295	0.3523	-----+	-0.1145	0.036	0.001486	0.4558	0.08983	+-----	-0.2656	0.0719	0.0002195		0.1489	0.5249	--++-+	+-----	0.02153	0.0495	-0.251	0.06843	-0.002425	8.615e-06
	ALL	DBP	CURDRINK	FEMALE	4	99318162	4:99318162:C_T	rs1229984	T	C	442440	293603	6	0.4617	0.1685	--+---	-0.0771	0.0527	0.1434	0.4811	0.01336	+++---	-0.2091	0.1217	0.08582		0.1627	0.1085	--++++	+++---	0.0321	0.06661	-0.2665	0.1033	-0.004403	0.01134
	ALL	DBP	CURDRINK	MALE	4	99318162	4:99318162:C_T	rs1229984	T	C	588618	407134	6	0.4114	0.2304	+----+	-0.1534	0.0486	0.001613	0.4091	0.3851	+---++	-0.2996	0.0983	0.002316		0.1418	0.292	--++-+	+---++	0.02452	0.07737	-0.2495	0.09663	-0.005919	0.0006556
	ALL	DBP	HEAVYvsLIGHT	COMBINED	4	99318162	4:99318162:C_T	rs1229984	T	C	673964	194779	4	0.3693	0.381	?----	-0.2257	0.0498	5.839e-06	0.4129	0.03887	?----	-0.4452	0.1079	3.716e-05		0.1076	0.0737	?---+	?----	-0.06338	0.05564	-0.404	0.1085	-0.003066	1.985e-06
	ALL	DBP	HEAVYvsLIGHT	FEMALE	4	99318162	4:99318162:C_T	rs1229984	T	C	259282	72258	2	0.3091	0.02438	?+-??	-0.1738	0.0847	0.04011	0.319	0.5857	?--??	-0.7018	0.1967	0.0003602		0.078	0.08349	?+-??	?--??	0.06812	0.09377	-0.7394	0.1951	-0.008718	0.0003579
	ALL	DBP	HEAVYvsLIGHT	MALE	4	99318162	4:99318162:C_T	rs1229984	T	C	360268	114889	3	0.4261	0.8157	?---?	-0.2246	0.0622	0.0003054	0.478	0.01553	?+--?	-0.2798	0.1332	0.03561		0.1395	0.1317	?---?	?+--?	-0.1078	0.07182	-0.2265	0.1323	-0.005111	0.003721
	ALL	DBP	HEAVYvsNEVER	COMBINED	4	99318162	4:99318162:C_T	rs1229984	T	C	325520	184882	4	0.5965	0.009667	?---+	-0.1642	0.0549	0.002777	0.5959	0.01062	?----	-0.4791	0.1294	0.000214		0.2566	0.02252	?++-+	?----	0.04871	0.06426	-0.5119	0.1156	-0.004099	7.171e-06
	ALL	DBP	HEAVYvsNEVER	FEMALE	4	99318162	4:99318162:C_T	rs1229984	T	C	146159	67702	2	0.6614	0.0243	?--??	-0.0997	0.0716	0.1639	0.6155	0.1405	?--??	-0.5504	0.2468	0.02572		0.3425	0.49	?++??	?--??	0.0282	0.07726	-0.6716	0.1939	-0.00594	0.001356
	ALL	DBP	HEAVYvsNEVER	MALE	4	99318162	4:99318162:C_T	rs1229984	T	C	152181	110910	3	0.5563	0.3868	?---?	-0.2479	0.0859	0.003895	0.5781	0.06502	?---?	-0.5347	0.1768	0.002487		0.2093	0.299	?+++?	?---?	0.1021	0.1259	-0.4601	0.1689	-0.01575	0.004881
	ALL	DBP	LIGHTvsNEVER	COMBINED	4	99318162	4:99318162:C_T	rs1229984	T	C	580071	433467	5	0.485	0.1682	++--+	-0.0222	0.0442	0.6153	0.5657	0.4698	-+---	-0.0756	0.0965	0.4337		0.1944	0.3753	+++-+	-----	0.04221	0.06182	-0.1145	0.08485	-0.003797	0.367
	ALL	DBP	LIGHTvsNEVER	FEMALE	4	99318162	4:99318162:C_T	rs1229984	T	C	257856	168327	4	0.5503	0.2494	?+--+	0.0343	0.0609	0.5734	0.5839	0.1598	?+---	0.1337	0.154	0.3851		0.233	0.115	?++-+	?+---	0.03245	0.07363	0.003755	0.1232	-0.005395	0.8494
	ALL	DBP	LIGHTvsNEVER	MALE	4	99318162	4:99318162:C_T	rs1229984	T	C	301135	250886	5	0.4339	0.08259	+---+	-0.0746	0.0629	0.2358	0.5185	0.9908	---++	-0.1589	0.1453	0.274		0.1673	0.2903	+++-+	---++	0.06779	0.1189	-0.1745	0.1383	-0.01404	0.2811
	ALL	PP	CURDRINK	COMBINED	4	99318162	4:99318162:C_T	rs1229984	T	C	1078630	731456	6	0.4926	1.73e-07	-+----	-0.1809	0.0386	2.703e-06	0.5168	0.5188	-+----	-0.3039	0.078	9.799e-05		0.1489	0.0004616	--+-++	-+----	0.01863	0.05222	-0.438	0.07377	-0.002704	1.362e-14
	ALL	PP	CURDRINK	FEMALE	4	99318162	4:99318162:C_T	rs1229984	T	C	442427	293597	6	0.51	0.0004234	--+-+-	-0.1169	0.0539	0.03008	0.5182	0.8964	-+----	-0.2762	0.1274	0.03009		0.1627	0.211	--+-++	-+----	0.05646	0.06584	-0.519	0.1072	-0.004301	2.511e-07
	ALL	PP	CURDRINK	MALE	4	99318162	4:99318162:C_T	rs1229984	T	C	588603	407125	6	0.4729	0.0002332	+----+	-0.2741	0.054	3.83e-07	0.4747	0.5166	++--+-	-0.3186	0.1115	0.004263		0.1418	0.001313	--+--+	++--+-	-0.05716	0.08738	-0.3459	0.1088	-0.007565	6.154e-09
	ALL	PP	HEAVYvsLIGHT	COMBINED	4	99318162	4:99318162:C_T	rs1229984	T	C	673949	194775	4	0.4206	0.0007421	?----	-0.3897	0.0528	1.633e-13	0.4642	0.5949	?+-+-	-0.1083	0.1147	0.3452		0.1076	0.001097	?----	?+-+-	-0.3475	0.05981	-0.07082	0.1149	-0.003546	6.344e-12
	ALL	PP	HEAVYvsLIGHT	FEMALE	4	99318162	4:99318162:C_T	rs1229984	T	C	259276	72256	2	0.3591	0.01041	?--??	-0.4099	0.0865	2.183e-06	0.3722	0.7943	?--??	-0.2683	0.2042	0.1889		0.078	0.05019	?--??	?--??	-0.3114	0.09688	-0.3105	0.2015	-0.009307	1.262e-05
	ALL	PP	HEAVYvsLIGHT	MALE	4	99318162	4:99318162:C_T	rs1229984	T	C	360259	114887	3	0.4833	0.0002248	?---?	-0.4029	0.0673	2.147e-09	0.5263	0.341	?+-+?	-0.0136	0.1432	0.9245		0.1395	0.0005637	?---?	?+-+?	-0.3947	0.07869	0.06182	0.1421	-0.006148	7.172e-08
	ALL	PP	HEAVYvsNEVER	COMBINED	4	99318162	4:99318162:C_T	rs1229984	T	C	325508	184878	4	0.6367	0.0001701	?+-++	-0.049	0.0556	0.3781	0.6344	0.4511	?----	-0.3019	0.1366	0.02706		0.2566	0.01634	?+-++	?----	0.08891	0.06328	-0.4739	0.1216	-0.003979	0.0003928
	ALL	PP	HEAVYvsNEVER	FEMALE	4	99318162	4:99318162:C_T	rs1229984	T	C	146151	67700	2	0.6862	0.006594	?+-??	-0.0004	0.0708	0.9951	0.6377	0.6726	?--??	-0.5169	0.2595	0.04637		0.3425	0.4727	?+-??	?--??	0.07739	0.07373	-0.6771	0.206	-0.005411	0.004461
	ALL	PP	HEAVYvsNEVER	MALE	4	99318162	4:99318162:C_T	rs1229984	T	C	152177	110908	3	0.6025	0.01678	?--+?	-0.1415	0.0906	0.1185	0.6255	0.402	?---?	-0.2706	0.1888	0.1517		0.2093	0.0217	?+++?	?---?	0.1138	0.1306	-0.3977	0.1793	-0.01698	0.04819
	ALL	PP	LIGHTvsNEVER	COMBINED	4	99318162	4:99318162:C_T	rs1229984	T	C	580048	433456	5	0.5474	2.212e-06	-+-++	-0.1324	0.0462	0.004164	0.6177	0.2644	+----	-0.3474	0.1021	0.0006649		0.1944	0.02098	-+-++	+----	0.08936	0.06231	-0.4929	0.08953	-0.003861	1.161e-09
	ALL	PP	LIGHTvsNEVER	FEMALE	4	99318162	4:99318162:C_T	rs1229984	T	C	257846	168323	4	0.5885	7.133e-05	?+-++	-0.0539	0.0612	0.3786	0.6209	0.6909	?----	-0.2712	0.1598	0.0897		0.233	0.06131	?+-++	?----	0.0898	0.07184	-0.4941	0.1273	-0.005137	0.0002831
	ALL	PP	LIGHTvsNEVER	MALE	4	99318162	4:99318162:C_T	rs1229984	T	C	301124	250879	5	0.5013	0.07247	+---+	-0.2319	0.069	0.0007792	0.5807	0.282	+---+	-0.3656	0.1571	0.01999		0.1673	0.2167	-++-+	+---+	0.06848	0.1249	-0.4347	0.1485	-0.01552	3.281e-05
	ALL	SBP	CURDRINK	COMBINED	4	99318162	4:99318162:C_T	rs1229984	T	C	1078720	731492	6	0.4576	4.242e-05	-----+	-0.3062	0.0589	1.976e-07	0.4845	0.1949	++----	-0.5647	0.116	1.118e-06	0.00717406	0.1489	0.008129	--+--+	++----	0.0204	0.07988	-0.6663	0.1113	-0.00632	1.587e-15
	ALL	SBP	CURDRINK	FEMALE	4	99318162	4:99318162:C_T	rs1229984	T	C	442450	293608	6	0.4801	0.000864	--+---	-0.2105	0.0846	0.01283	0.4965	0.2005	-+----	-0.4593	0.1943	0.01809		0.1627	0.04238	--+-++	-+----	0.06524	0.1047	-0.7509	0.1652	-0.01088	5.141e-07
	ALL	SBP	CURDRINK	MALE	4	99318162	4:99318162:C_T	rs1229984	T	C	588648	407148	6	0.4439	0.002328	+----+	-0.4235	0.0791	8.537e-08	0.4404	0.3349	++--++	-0.6377	0.1599	6.633e-05		0.1419	0.005412	--+--+	++--++	-0.02752	0.1258	-0.601	0.1574	-0.01567	5.405e-10
	ALL	SBP	HEAVYvsLIGHT	COMBINED	4	99318162	4:99318162:C_T	rs1229984	T	C	673976	194788	4	0.3968	0.004181	?----	-0.6083	0.0795	2.048e-14	0.4473	0.0862	?----	-0.5284	0.1722	0.002155		0.1076	0.0006668	?---+	?----	-0.4142	0.08892	-0.4482	0.1729	-0.00783	1.141e-12
	ALL	SBP	HEAVYvsLIGHT	FEMALE	4	99318162	4:99318162:C_T	rs1229984	T	C	259279	72257	2	0.3335	0.002751	?--??	-0.5731	0.1335	1.776e-05	0.3498	0.9239	?--??	-0.9623	0.3142	0.002195		0.078	0.01222	?+-??	?--??	-0.2433	0.1488	-1.046	0.3095	-0.02196	3.632e-06
	ALL	SBP	HEAVYvsLIGHT	MALE	4	99318162	4:99318162:C_T	rs1229984	T	C	360275	114897	3	0.4624	0.008792	?---?	-0.6148	0.1	7.718e-10	0.515	0.03591	?+--?	-0.225	0.2122	0.2888		0.1395	0.003087	?---?	?+--?	-0.5032	0.1159	-0.1103	0.2114	-0.01331	2.232e-07
	ALL	SBP	HEAVYvsNEVER	COMBINED	4	99318162	4:99318162:C_T	rs1229984	T	C	325518	184883	4	0.6112	0.0001425	?---+	-0.2219	0.0875	0.01121	0.616	0.02766	?----	-0.7685	0.205	0.0001776		0.2566	0.005233	?++++	?----	0.1236	0.09999	-0.9589	0.1855	-0.009931	3.069e-07
	ALL	SBP	HEAVYvsNEVER	FEMALE	4	99318162	4:99318162:C_T	rs1229984	T	C	146155	67701	2	0.6718	0.002023	?+-??	-0.1052	0.1139	0.3555	0.628	0.356	?--??	-1.0184	0.3907	0.009138		0.3425	0.4194	?+-??	?--??	0.09605	0.1202	-1.319	0.3132	-0.01438	9.649e-05
	ALL	SBP	HEAVYvsNEVER	MALE	4	99318162	4:99318162:C_T	rs1229984	T	C	152181	110911	3	0.583	0.0393	?---?	-0.3722	0.1365	0.006406	0.6037	0.08718	?---?	-0.786	0.2806	0.0051		0.2093	0.02089	?+++?	?---?	0.2318	0.1981	-0.8412	0.2685	-0.03899	0.001878
	ALL	SBP	LIGHTvsNEVER	COMBINED	4	99318162	4:99318162:C_T	rs1229984	T	C	580089	433470	5	0.512	0.00143	-+--+	-0.1719	0.0714	0.01605	0.5871	0.2365	+----	-0.4116	0.154	0.007501		0.1945	0.1863	-+-++	+----	0.1182	0.09775	-0.596	0.1366	-0.009492	1.953e-06
	ALL	SBP	LIGHTvsNEVER	FEMALE	4	99318162	4:99318162:C_T	rs1229984	T	C	257852	168325	4	0.5626	0.01203	?+--+	-0.0351	0.097	0.7173	0.5957	0.2667	?+---	-0.092	0.2445	0.7066		0.233	0.09557	?+-++	?+---	0.104	0.1142	-0.4559	0.1958	-0.01299	0.05728
	ALL	SBP	LIGHTvsNEVER	MALE	4	99318162	4:99318162:C_T	rs1229984	T	C	301148	250889	5	0.4679	0.1186	+---+	-0.3191	0.1016	0.001677	0.5462	0.5159	+---+	-0.5762	0.2315	0.01283		0.1674	0.3645	-++-+	+--++	0.1523	0.1873	-0.6447	0.2201	-0.03486	0.0001058
	AFR	DBP	CURDRINK	COMBINED	5	80645829	5:80645829:C_T	rs113808516	T	C	54258	25738	5	0.0119	0.4756	?+??????-??????--+?	-0.7568	0.3513	0.0312	0.0117	0.9381	?-??????-??????---?	-1.823	0.7087	0.0101		0.0117	0.6103	?+??????+??????--+?	?-??????-??????---?	-0.07125	0.4881	-1.449	0.6896	-0.238	0.008531
	AFR	DBP	CURDRINK	FEMALE	5	80645829	5:80645829:C_T	rs113808516	T	C	13792	5194	3	0.0111	0.2814	?-????????????-+??	-0.8898	0.7083	0.209	0.0111	0.6152	?-????????????--??	-2.4665	1.4269	0.08389		0.0106	0.5819	?+????????????-+??	?-????????????--??	0.05218	0.913	-2.638	1.419	-0.8306	0.06169
	AFR	DBP	CURDRINK	MALE	5	80645829	5:80645829:C_T	rs113808516	T	C	35021	17573	4	0.0117	0.1387	?+??????????--+	-0.7139	0.4215	0.09032	0.0116	0.8171	?-??????????---	-1.6106	0.8518	0.05863		0.0116	0.2207	?+??????????--+	?-??????????---	-0.1538	0.5917	-1.14	0.8343	-0.35	0.08767
	AFR	DBP	HEAVYvsLIGHT	COMBINED	5	80645829	5:80645829:C_T	rs113808516	T	C	13987	2460	2	0.0119	0.5564	?-????-???	-1.9506	0.6536	0.002842	0.0121	0.539	?+????-???	-1.149	1.781	0.5188		0.0119	0.7049	?-????-???	?+????-???	-1.785	0.7357	-0.9627	1.711	-0.5396	0.01093
	AFR	DBP	HEAVYvsNEVER	COMBINED	5	80645829	5:80645829:C_T	rs113808516	T	C	7861	2472	2	0.0117	0.2812	?+????-???	-0.2867	0.9627	0.7658	0.0117	0.6939	?-????-???	-3.4832	1.9711	0.07721		0.0107	0.7292	?+????+???	?-????-???	0.8939	1.216	-3.572	1.962	-1.469	0.1764
	AFR	DBP	LIGHTvsNEVER	COMBINED	5	80645829	5:80645829:C_T	rs113808516	T	C	26144	16944	4	0.0126	0.2564	?+???????--+?	-0.5917	0.4749	0.2128	0.0124	0.8558	?-???????---?	-3.2911	1.1052	0.002904		0.0122	0.3288	?+???????+++?	?-???????---?	1.114	0.8167	-2.6	0.9966	-0.6667	0.01455
	AFR	DBP	LIGHTvsNEVER	MALE	5	80645829	5:80645829:C_T	rs113808516	T	C	12392	10451	2	0.0122	0.0564	???????-?+	-0.3676	0.6833	0.5906	0.0124	0.3196	???????-?-	-2.2857	1.7443	0.1901		0.0122	0.1188	???????-?+	???????-?-	1.7	1.565	-2.574	1.736	-2.449	0.2819
	AFR	PP	CURDRINK	COMBINED	5	80645829	5:80645829:C_T	rs113808516	T	C	54257	25738	5	0.012	0.8469	?+??????-??????+-+?	0.464	0.3988	0.2446	0.0117	0.6863	?-??????-??????---?	-2.1433	0.8078	0.007972		0.0117	0.7859	?+??????-??????+++?	?-??????-??????---?	1.406	0.559	-1.95	0.7803	-0.3121	0.02757
	AFR	PP	CURDRINK	FEMALE	5	80645829	5:80645829:C_T	rs113808516	T	C	13792	5194	3	0.011	0.9055	?-????????????-+??	-0.2208	0.7982	0.7821	0.011	0.4142	?-????????????--??	-2.6785	1.5977	0.09365		0.0106	0.6587	?-????????????-+??	?-????????????--??	0.6085	1.028	-2.709	1.592	-1.052	0.1896
	AFR	PP	CURDRINK	MALE	5	80645829	5:80645829:C_T	rs113808516	T	C	35020	17573	4	0.0117	0.5825	?+??????????+-+	0.8396	0.4886	0.0857	0.0116	0.4355	?-??????????---	-2.1991	0.9937	0.0269		0.0116	0.5156	?+??????????+-+	?-??????????---	1.857	0.6962	-2.032	0.9675	-0.4844	0.02831
	AFR	PP	HEAVYvsLIGHT	COMBINED	5	80645829	5:80645829:C_T	rs113808516	T	C	13987	2460	2	0.0121	0.4465	?-????-???	-0.5224	0.7264	0.4721	0.0123	0.1982	?-????+???	2.4336	1.846	0.1874		0.0119	0.2176	?-????-???	?-????+???	-0.9702	0.8063	1.925	1.796	-0.6477	0.4072
	AFR	PP	HEAVYvsNEVER	COMBINED	5	80645829	5:80645829:C_T	rs113808516	T	C	7860	2472	2	0.0112	0.009679	?+????+???	4.2267	1.06	6.651e-05	0.0113	0.5995	?-????-???	-4.3223	2.1421	0.04362		0.0107	0.01191	?+????+???	?-????-???	5.474	1.318	-3.928	2.138	-1.722	0.0001209
	AFR	PP	LIGHTvsNEVER	COMBINED	5	80645829	5:80645829:C_T	rs113808516	T	C	26143	16944	4	0.0126	0.7628	?+???????+++?	1.1948	0.5349	0.02549	0.0122	0.115	?-???????---?	-6.1509	1.2466	8.046e-07		0.0122	0.1563	?+???????+++?	?-???????---?	4.744	0.9195	-5.388	1.124	-0.8451	1.169e-06
	AFR	PP	LIGHTvsNEVER	MALE	5	80645829	5:80645829:C_T	rs113808516	T	C	12392	10451	2	0.0124	0.8108	???????+?+	1.069	0.7908	0.1764	0.0125	0.5153	???????-?-	-11.5697	2.0755	2.484e-08	0.0165658	0.0122	0.5557	???????+?+	???????-?-	10.27	1.827	-11.39	2.032	-3.338	6.655e-08
	AFR	SBP	CURDRINK	COMBINED	5	80645829	5:80645829:C_T	rs113808516	T	C	54262	25741	5	0.012	0.5744	?+??????+??????--+?	-0.1141	0.5723	0.842	0.0118	0.1837	?-??????+??????---?	-3.4516	1.1586	0.002891		0.0117	0.2299	?+??????+??????+++?	?-??????+??????---?	1.302	0.7885	-3.048	1.122	-0.6213	0.02524
	AFR	SBP	CURDRINK	FEMALE	5	80645829	5:80645829:C_T	rs113808516	T	C	13794	5194	3	0.0112	0.5475	?-????????????-+??	-1.1868	1.177	0.3135	0.0113	0.9315	?-????????????--??	-5.141	2.3601	0.02939		0.0107	0.8855	?+????????????-+??	?-????????????--??	0.6451	1.514	-5.351	2.348	-2.284	0.03123
	AFR	SBP	CURDRINK	MALE	5	80645829	5:80645829:C_T	rs113808516	T	C	35023	17576	4	0.0117	0.2501	?+??????????+-+	0.1152	0.6981	0.869	0.0116	0.5181	?-??????????---	-3.7298	1.4145	0.008369		0.0116	0.2329	?+??????????+-+	?-??????????---	1.644	0.9822	-3.118	1.385	-0.9643	0.08047
	AFR	SBP	HEAVYvsLIGHT	COMBINED	5	80645829	5:80645829:C_T	rs113808516	T	C	13990	2460	2	0.0119	0.9256	?-????-???	-2.3649	1.067	0.02659	0.0121	0.6827	?+????+???	1.7675	2.8266	0.5318		0.0119	0.8486	?-????-???	?+????+???	-2.706	1.177	1.53	2.751	-1.381	0.06429
	AFR	SBP	HEAVYvsNEVER	COMBINED	5	80645829	5:80645829:C_T	rs113808516	T	C	7861	2472	2	0.0118	0.2971	?+????+???	4.399	1.58	0.005378	0.0118	0.562	?-????-???	-8.0416	3.2044	0.01209		0.0107	0.2767	?+????+???	?-????-???	7.028	1.985	-7.758	3.199	-3.913	0.001997
	AFR	SBP	LIGHTvsNEVER	COMBINED	5	80645829	5:80645829:C_T	rs113808516	T	C	26147	16947	4	0.0126	0.7242	?+???????-++?	0.6488	0.7909	0.412	0.0123	0.5377	?-???????---?	-9.7599	1.847	1.262e-07		0.0122	0.3283	?+???????+++?	?-???????---?	6.171	1.373	-8.284	1.668	-1.885	4.162e-06
	AFR	SBP	LIGHTvsNEVER	MALE	5	80645829	5:80645829:C_T	rs113808516	T	C	12392	10451	2	0.0122	0.3227	???????+?+	0.7177	1.13	0.5254	0.0124	0.8831	???????-?-	-14.0027	2.9349	1.832e-06		0.0122	0.8729	???????+?+	???????-?-	12.18	2.619	-14.14	2.904	-6.855	5.936e-06
	EAS	DBP	CURDRINK	COMBINED	7	126565394	7:126565394:C_T	rs140219321	T	C	164219	72634	2	0.016	0.6747	-????+???????	-0.0461	0.1874	0.8056	0.0161	0.8017	+????+???????	0.4714	0.346	0.173		0.016	0.84	-????-???????	+????+???????	-0.2389	0.2306	0.4395	0.35	-0.05318	0.4565
	EAS	DBP	CURDRINK	FEMALE	7	126565394	7:126565394:C_T	rs140219321	T	C	80423	19255	2	0.0149	0.1627	-?+?	-0.254	0.2591	0.3268	0.0156	0.4916	+?+?	0.8686	0.5883	0.1398		0.015	0.1968	-?-?	+?+?	-0.3988	0.2808	0.6709	0.5887	-0.07883	0.3281
	EAS	DBP	CURDRINK	MALE	7	126565394	7:126565394:C_T	rs140219321	T	C	83796	53379	2	0.0169	0.7334	+????+?????	0.2124	0.2472	0.3903	0.017	0.5034	+????-?????	-0.0105	0.4844	0.9827		0.0169	0.7136	+????+?????	+????-?????	0.2245	0.3873	-0.02122	0.4888	-0.15	0.6786
	EAS	DBP	HEAVYvsLIGHT	COMBINED	7	126565394	7:126565394:C_T	rs140219321	T	C	72489	24959	2	0.0164	0.8595	+??+?	0.1969	0.2702	0.466	0.0165	0.8833	+??+?	0.9272	0.5378	0.08466		0.0164	0.9767	-??-?	+??+?	-0.1487	0.3215	0.9225	0.5416	-0.1034	0.1958
	EAS	DBP	HEAVYvsLIGHT	MALE	7	126565394	7:126565394:C_T	rs140219321	T	C	53289	19226	2	0.0166	0.4333	+??-?	0.2088	0.3069	0.4963	0.0166	0.7768	+??+?	0.9432	0.609	0.1214		0.0167	0.608	+??-?	+??+?	-0.1525	0.3716	0.9358	0.6146	-0.1381	0.2641
	EAS	DBP	HEAVYvsNEVER	COMBINED	7	126565394	7:126565394:C_T	rs140219321	T	C	101769	24959	2	0.0153	0.7711	-??+?	0.0257	0.23	0.9111	0.0163	0.954	+??+?	1.1187	0.523	0.03243		0.0153	0.7934	-??-?	+??+?	-0.2508	0.2535	1.022	0.5105	-0.06423	0.1426
	EAS	DBP	HEAVYvsNEVER	FEMALE	7	126565394	7:126565394:C_T	rs140219321	T	C	63845	5733	2	0.0147	0.2466	--?	-0.3404	0.2853	0.2327	0.0173	0.5074	++?	1.415	1.0074	0.1601		0.0148	0.268	--?	++?	-0.4348	0.2936	1.045	0.9782	-0.08618	0.2726
	EAS	DBP	HEAVYvsNEVER	MALE	7	126565394	7:126565394:C_T	rs140219321	T	C	37924	19226	2	0.0161	0.7977	+??+?	0.7322	0.3613	0.0427	0.016	0.9971	+??+?	0.1731	0.7067	0.8064		0.0161	0.8874	+??+?	+??+?	0.5526	0.5022	0.2247	0.7029	-0.2522	0.1628
	EAS	DBP	LIGHTvsNEVER	COMBINED	7	126565394	7:126565394:C_T	rs140219321	T	C	124340	47530	2	0.0153	0.6789	--?????	-0.2072	0.2115	0.3272	0.0156	0.697	+-?????	0.1384	0.4131	0.7376		0.0152	0.8151	--?????	+-?????	-0.2476	0.2509	0.08765	0.4098	-0.06295	0.5558
	EAS	DBP	LIGHTvsNEVER	FEMALE	7	126565394	7:126565394:C_T	rs140219321	T	C	71579	13467	2	0.0144	0.116	--?	-0.3532	0.2717	0.1937	0.0151	0.4934	++?	0.6006	0.6772	0.3752		0.0145	0.1759	--?	++?	-0.4225	0.285	0.4273	0.6805	-0.08123	0.3417
	EAS	DBP	LIGHTvsNEVER	MALE	7	126565394	7:126565394:C_T	rs140219321	T	C	52761	34063	2	0.0163	0.4643	+-???	0.0991	0.3054	0.7455	0.0159	0.7728	--???	-0.7957	0.6312	0.2074		0.0162	0.618	++???	--???	0.5396	0.5008	-0.7015	0.624	-0.2509	0.5166
	EAS	PP	CURDRINK	COMBINED	7	126565394	7:126565394:C_T	rs140219321	T	C	164200	72625	2	0.0153	0.6614	-????-???????	-0.13	0.1871	0.4873	0.0155	0.261	+????+???????	1.3982	0.3556	8.433e-05		0.016	0.5332	-????-???????	+????+???????	-0.7183	0.2307	1.385	0.3569	-0.05322	0.0005619
	EAS	PP	CURDRINK	FEMALE	7	126565394	7:126565394:C_T	rs140219321	T	C	80413	19251	2	0.0143	0.5736	-?-?	-0.655	0.2531	0.009663	0.0151	0.2483	+?+?	1.1826	0.5989	0.04833		0.015	0.3145	-?-?	+?+?	-0.899	0.2722	1.072	0.5885	-0.07409	0.004081
	EAS	PP	CURDRINK	MALE	7	126565394	7:126565394:C_T	rs140219321	T	C	83787	53374	2	0.0163	0.9843	+????+?????	0.4575	0.258	0.07621	0.0164	0.4251	+????+?????	1.1334	0.5167	0.02828		0.0169	0.7191	-????-?????	+????+?????	-0.2545	0.4106	1.128	0.5168	-0.1686	0.01963
	EAS	PP	HEAVYvsLIGHT	COMBINED	7	126565394	7:126565394:C_T	rs140219321	T	C	72480	24957	2	0.0159	0.3486	+??+?	0.6693	0.2701	0.01322	0.0161	0.7712	+??+?	2.4043	0.5405	8.664e-06		0.0164	0.5053	-??+?	+??+?	-0.1614	0.3218	2.368	0.5452	-0.1036	4.705e-06
	EAS	PP	HEAVYvsLIGHT	MALE	7	126565394	7:126565394:C_T	rs140219321	T	C	53284	19226	2	0.0162	0.7372	+??+?	0.8906	0.3127	0.004397	0.0162	0.5475	+??+?	2.1655	0.627	0.0005523		0.0167	0.8106	-??+?	+??+?	0.1005	0.3818	2.166	0.6307	-0.1457	4.562e-05
	EAS	PP	HEAVYvsNEVER	COMBINED	7	126565394	7:126565394:C_T	rs140219321	T	C	101759	24957	2	0.0146	0.3102	+??-?	-0.1634	0.2275	0.4727	0.0157	0.8266	+??+?	3.1539	0.5394	5.015e-09	0.0220956	0.0153	0.8747	-??-?	+??+?	-0.8679	0.2482	3.085	0.5229	-0.06158	2.877e-08
	EAS	PP	HEAVYvsNEVER	FEMALE	7	126565394	7:126565394:C_T	rs140219321	T	C	63837	5731	2	0.0141	0.849	--?	-0.7168	0.2803	0.01055	0.0166	0.1718	++?	3.3419	1.0592	0.001605		0.0148	0.2407	--?	++?	-0.9489	0.2815	3.077	1.025	-0.07924	0.000331
	EAS	PP	HEAVYvsNEVER	MALE	7	126565394	7:126565394:C_T	rs140219321	T	C	37922	19226	2	0.0155	0.4441	+??+?	0.8982	0.37	0.0152	0.0155	0.8821	+??+?	2.7395	0.736	0.0001974		0.0161	0.9516	-??-?	+??+?	-0.5016	0.513	2.771	0.7277	-0.2632	4.343e-05
	EAS	PP	LIGHTvsNEVER	COMBINED	7	126565394	7:126565394:C_T	rs140219321	T	C	124325	47523	2	0.0146	0.669	--?????	-0.5999	0.2093	0.004144	0.015	0.5107	++?????	0.8133	0.4232	0.05461		0.0152	0.5249	--?????	++?????	-0.8641	0.2476	0.7148	0.4166	-0.06133	0.002489
	EAS	PP	LIGHTvsNEVER	FEMALE	7	126565394	7:126565394:C_T	rs140219321	T	C	71571	13465	2	0.0139	0.3176	--?	-0.8753	0.2663	0.001015	0.0145	0.2865	-+?	0.4291	0.689	0.5334		0.0145	0.286	--?	-+?	-0.9483	0.2787	0.3211	0.6828	-0.07767	0.001843
	EAS	PP	LIGHTvsNEVER	MALE	7	126565394	7:126565394:C_T	rs140219321	T	C	52754	34058	2	0.0157	0.8193	--???	-0.1251	0.3168	0.6928	0.0153	0.6655	++???	0.6195	0.6569	0.3457		0.0162	0.852	--???	++???	-0.4899	0.5114	0.5776	0.6439	-0.2616	0.6216
	EAS	SBP	CURDRINK	COMBINED	7	126565394	7:126565394:C_T	rs140219321	T	C	164212	72631	2	0.0158	0.9658	-????-???????	-0.1521	0.2973	0.6089	0.016	0.5658	+????+???????	1.8095	0.5402	0.0008089		0.016	0.7827	-????-???????	+????+???????	-0.9244	0.3597	1.768	0.5484	-0.1294	0.006896
	EAS	SBP	CURDRINK	FEMALE	7	126565394	7:126565394:C_T	rs140219321	T	C	80418	19253	2	0.0148	0.216	-?-?	-0.9165	0.4092	0.02511	0.0156	0.242	+?+?	1.9836	0.9238	0.03178		0.015	0.122	-?-?	+?+?	-1.302	0.4349	1.671	0.9163	-0.1892	0.0118
	EAS	SBP	CURDRINK	MALE	7	126565394	7:126565394:C_T	rs140219321	T	C	83794	53378	2	0.0168	0.7985	+????+?????	0.678	0.3887	0.08103	0.0168	0.9223	+????+?????	1.037	0.7608	0.1729		0.0169	0.904	+????-?????	+????+?????	0.03334	0.6068	1.024	0.7655	-0.3682	0.0862
	EAS	SBP	HEAVYvsLIGHT	COMBINED	7	126565394	7:126565394:C_T	rs140219321	T	C	72486	24961	2	0.0163	0.4887	+??+?	0.8498	0.4183	0.04216	0.0164	0.9099	+??+?	3.3804	0.8227	3.977e-05		0.0164	0.7165	-??+?	+??+?	-0.3498	0.4931	3.342	0.8317	-0.2432	5.662e-05
	EAS	SBP	HEAVYvsLIGHT	MALE	7	126565394	7:126565394:C_T	rs140219321	T	C	53288	19229	2	0.0165	0.7569	+??+?	1.0869	0.4738	0.02178	0.0165	0.829	+??+?	3.1692	0.9337	0.0006882		0.0167	0.8716	+??-?	+??+?	-0.08285	0.571	3.163	0.9441	-0.326	0.0003061
	EAS	SBP	HEAVYvsNEVER	COMBINED	7	126565394	7:126565394:C_T	rs140219321	T	C	101767	24961	2	0.0151	0.6001	+??-?	-0.086	0.3646	0.8135	0.0161	0.9243	+??+?	4.2655	0.8148	1.648e-07		0.0153	0.7842	-??-?	+??+?	-1.113	0.3928	4.111	0.7992	-0.1543	3.035e-06
	EAS	SBP	HEAVYvsNEVER	FEMALE	7	126565394	7:126565394:C_T	rs140219321	T	C	63841	5732	2	0.0146	0.4039	--?	-1.0483	0.4525	0.02052	0.0171	0.2082	++?	4.6407	1.586	0.003433		0.0148	0.135	--?	++?	-1.4	0.4548	3.997	1.538	-0.2068	0.002038
	EAS	SBP	HEAVYvsNEVER	MALE	7	126565394	7:126565394:C_T	rs140219321	T	C	37926	19229	2	0.016	0.4834	+??+?	1.6866	0.5627	0.002719	0.0159	0.9358	+??+?	2.9024	1.1	0.008344		0.0161	0.8619	+??-?	+??+?	0.08361	0.778	2.992	1.093	-0.6053	0.0003844
	EAS	SBP	LIGHTvsNEVER	COMBINED	7	126565394	7:126565394:C_T	rs140219321	T	C	124331	47525	2	0.0151	0.603	--?????	-0.8113	0.3333	0.01495	0.0155	0.838	++?????	0.8951	0.6464	0.1661		0.0152	0.6555	--?????	++?????	-1.108	0.3896	0.7474	0.6401	-0.1518	0.0172
	EAS	SBP	LIGHTvsNEVER	FEMALE	7	126565394	7:126565394:C_T	rs140219321	T	C	71575	13466	2	0.0143	0.09754	--?	-1.258	0.4289	0.003355	0.015	0.2539	-+?	0.9311	1.0654	0.3822		0.0145	0.08857	--?	-+?	-1.386	0.4417	0.6414	1.059	-0.1951	0.006213
	EAS	SBP	LIGHTvsNEVER	MALE	7	126565394	7:126565394:C_T	rs140219321	T	C	52756	34059	2	0.0162	0.726	+-???	-0.0314	0.4772	0.9475	0.0158	0.8943	--???	-0.2595	0.9833	0.7919		0.0162	0.9125	+-???	--???	0.08442	0.7746	-0.1991	0.9676	-0.6	0.9753
	HIS	DBP	CURDRINK	COMBINED	8	95543831	8:95543831:A_C	rs6471542	A	C	37774	14459	9	0.4928	0.1197	---++-++-	-0.0216	0.06938	0.7551	0.4969	0.05971	--+++--+-	-0.1313	0.1515	0.3859		0.5034	0.0333	-+-+--+-+	--+++--+-	0.01759	0.08352	-0.1193	0.1436	-0.006808	0.675
	HIS	DBP	CURDRINK	FEMALE	8	95543831	8:95543831:A_C	rs6471542	A	C	16636	3966	8	0.4872	0.03817	--++++--	-0.0804	0.09744	0.4089	0.4981	0.09869	--+---+-	-0.5165	0.2553	0.04304		0.4995	0.01857	--++++-+	--+---+-	0.006801	0.1067	-0.4657	0.2439	-0.01103	0.1173
	HIS	DBP	CURDRINK	MALE	8	95543831	8:95543831:A_C	rs6471542	A	C	20813	10187	8	0.4979	0.7578	-+-++-+-	-0.0034	0.09947	0.9724	0.4994	0.006431	--++++-+	0.0494	0.1993	0.804		0.505	0.04728	++----+-	--++++-+	-0.01461	0.134	0.02942	0.1937	-0.01763	0.9887
	HIS	DBP	HEAVYvsLIGHT	COMBINED	8	95543831	8:95543831:A_C	rs6471542	A	C	12275	2110	6	0.5115	0.406	-+-++-	-0.0151	0.1261	0.9047	0.5126	0.8201	+++-+-	0.1103	0.3316	0.7395		0.5148	0.7663	-+-++-	+++-+-	-0.04265	0.1402	0.1632	0.3204	-0.0191	0.8742
	HIS	DBP	HEAVYvsLIGHT	MALE	8	95543831	8:95543831:A_C	rs6471542	A	C	8876	1547	5	0.5061	0.729	-+--+	-0.0325	0.1498	0.8285	0.5068	0.9495	+--+-	0.0634	0.3975	0.8733		0.5091	0.976	-+--+	+--+-	-0.05135	0.1682	0.1503	0.3802	-0.02764	0.9146
	HIS	DBP	HEAVYvsNEVER	COMBINED	8	95543831	8:95543831:A_C	rs6471542	A	C	9746	2112	6	0.481	0.9933	++--+-	0.0327	0.116	0.7781	0.5007	0.7338	++--+-	0.0476	0.3749	0.899		0.4984	0.9748	+--+-+	++--+-	0.03262	0.1301	0.009213	0.3154	-0.01659	0.9592
	HIS	DBP	LIGHTvsNEVER	COMBINED	8	95543831	8:95543831:A_C	rs6471542	A	C	18567	10542	7	0.4924	0.581	-++-++-	0.0193	0.0922	0.8338	0.4965	0.5405	-++-++-	-0.197	0.2247	0.3808		0.5056	0.5748	+-+++-+	-++-++-	0.06313	0.1258	-0.09538	0.1833	-0.01558	0.8555
	HIS	DBP	LIGHTvsNEVER	FEMALE	8	95543831	8:95543831:A_C	rs6471542	A	C	9004	2709	6	0.4863	0.7199	-++-+-	-0.0101	0.1263	0.9364	0.5017	0.4117	----+-	-0.3503	0.3268	0.2838		0.5009	0.595	-++-++	----+-	0.05479	0.1435	-0.2503	0.2901	-0.02003	0.6886
	HIS	DBP	LIGHTvsNEVER	MALE	8	95543831	8:95543831:A_C	rs6471542	A	C	9242	7534	5	0.4998	0.4364	-+---	0.0179	0.1398	0.898	0.4935	0.6252	-+-++	-0.1135	0.3746	0.7619		0.5085	0.6131	+-+--	-+-++	0.05642	0.2719	-0.05961	0.3169	-0.07346	0.9785
	HIS	PP	CURDRINK	COMBINED	8	95543831	8:95543831:A_C	rs6471542	A	C	37774	14459	9	0.4984	0.6783	+---+----	-0.1867	0.08773	0.03328	0.5004	0.08632	-+--+-+++	0.1962	0.1817	0.2804		0.5034	0.2703	+--+-+---	-+--+-+++	-0.2669	0.105	0.2353	0.1749	-0.01074	0.03892
	HIS	PP	CURDRINK	FEMALE	8	95543831	8:95543831:A_C	rs6471542	A	C	16636	3966	8	0.4955	0.5083	+-+++---	-0.3237	0.1265	0.01051	0.5025	0.6495	-+-++-++	0.5791	0.3093	0.06122		0.4995	0.6817	+-++----	-+-++-++	-0.4467	0.1392	0.5959	0.2973	-0.01876	0.004814
	HIS	PP	CURDRINK	MALE	8	95543831	8:95543831:A_C	rs6471542	A	C	20813	10187	8	0.4999	0.4509	++--++--	-0.0291	0.1171	0.8034	0.5007	0.2839	--+-+-++	-0.0964	0.229	0.6738		0.505	0.3353	++---+--	--+-+-++	0.03583	0.1581	-0.128	0.2255	-0.02447	0.8315
	HIS	PP	HEAVYvsLIGHT	COMBINED	8	95543831	8:95543831:A_C	rs6471542	A	C	12275	2110	6	0.5141	0.6481	---+--	-0.0837	0.1401	0.5503	0.5148	0.7771	+---++	0.0934	0.3632	0.7972		0.5148	0.7214	---+--	+---++	-0.08393	0.1537	-0.02441	0.3557	-0.02291	0.8165
	HIS	PP	HEAVYvsLIGHT	MALE	8	95543831	8:95543831:A_C	rs6471542	A	C	8876	1547	5	0.5083	0.2849	---+-	-0.1413	0.1684	0.4015	0.5091	0.6867	+--++	0.4237	0.4352	0.3303		0.5091	0.3127	-----	+--++	-0.1865	0.1862	0.234	0.4248	-0.03373	0.6
	HIS	PP	HEAVYvsNEVER	COMBINED	8	95543831	8:95543831:A_C	rs6471542	A	C	9746	2112	6	0.4962	0.3888	----+-	-0.7345	0.1538	1.791e-06	0.5078	0.9846	+-++++	0.9865	0.4278	0.0211		0.4984	0.7728	------	+-++++	-0.8788	0.1708	0.739	0.379	-0.02853	1.671e-06
	HIS	PP	LIGHTvsNEVER	COMBINED	8	95543831	8:95543831:A_C	rs6471542	A	C	18567	10542	7	0.5041	0.3706	--+----	-0.4681	0.118	7.292e-05	0.5071	0.6166	+++++++	1.0779	0.2719	7.338e-05		0.5056	0.3656	-------	+++++++	-0.9293	0.1695	0.885	0.2295	-0.02827	3.414e-07
	HIS	PP	LIGHTvsNEVER	FEMALE	8	95543831	8:95543831:A_C	rs6471542	A	C	9004	2709	6	0.5003	0.9145	--+---	-0.7674	0.1684	5.192e-06	0.5093	0.686	++++++	1.4968	0.3961	0.0001574	0.0207768	0.5009	0.6606	--+---	++++++	-1.119	0.1997	1.202	0.3572	-0.03879	1.415e-07
	HIS	PP	LIGHTvsNEVER	MALE	8	95543831	8:95543831:A_C	rs6471542	A	C	9242	7534	5	0.5069	0.2484	-+-+-	-0.0651	0.1605	0.685	0.5027	0.2604	-++-+	0.0036	0.4137	0.9931		0.5085	0.1923	+--+-	-++-+	-0.1252	0.327	0.07874	0.3713	-0.1061	0.9005
	HIS	SBP	CURDRINK	COMBINED	8	95543831	8:95543831:A_C	rs6471542	A	C	37779	14461	9	0.4981	0.7565	---++--+-	-0.1867	0.1224	0.127	0.5006	0.08825	--+-+-++-	0.022	0.2547	0.9312		0.5034	0.2748	---+-+---	--+-+-++-	-0.2098	0.1465	0.0757	0.2445	-0.02093	0.2943
	HIS	SBP	CURDRINK	FEMALE	8	95543831	8:95543831:A_C	rs6471542	A	C	16638	3966	8	0.4944	0.3858	--+++---	-0.395	0.1795	0.02775	0.5026	0.2464	--+-+-+-	0.0892	0.4444	0.841		0.4995	0.2499	--++++--	--+-+-+-	-0.4185	0.1969	0.1323	0.4255	-0.03754	0.08088
	HIS	SBP	CURDRINK	MALE	8	95543831	8:95543831:A_C	rs6471542	A	C	20816	10189	8	0.5006	0.5995	-+--+-+-	-0.0172	0.1646	0.9166	0.5014	0.04901	--+-+--+	-0.1325	0.3241	0.6827		0.505	0.1502	++----+-	--+-+--+	0.07467	0.2226	-0.1741	0.3186	-0.04854	0.8606
	HIS	SBP	HEAVYvsLIGHT	COMBINED	8	95543831	8:95543831:A_C	rs6471542	A	C	12277	2110	6	0.5128	0.8524	---++-	-0.0949	0.2033	0.6408	0.514	0.7605	+---++	0.1644	0.5317	0.7571		0.5148	0.9035	---+--	+---++	-0.112	0.2238	0.1073	0.52	-0.04859	0.8831
	HIS	SBP	HEAVYvsLIGHT	MALE	8	95543831	8:95543831:A_C	rs6471542	A	C	8878	1547	5	0.5075	0.8788	-----	-0.1869	0.2406	0.4372	0.5081	0.7694	+--++	0.4077	0.6285	0.5165		0.5092	0.8979	-----	+--++	-0.2284	0.2668	0.2822	0.611	-0.0694	0.6905
	HIS	SBP	HEAVYvsNEVER	COMBINED	8	95543831	8:95543831:A_C	rs6471542	A	C	9746	2112	6	0.4914	0.6629	----+-	-0.6385	0.2117	0.002563	0.5056	0.9685	++++++	0.9586	0.6026	0.1117		0.4984	0.9125	------	++++++	-0.7548	0.2339	0.6518	0.5315	-0.05355	0.005397
	HIS	SBP	LIGHTvsNEVER	COMBINED	8	95543831	8:95543831:A_C	rs6471542	A	C	18569	10544	7	0.5007	0.4448	--+----	-0.4145	0.1627	0.01087	0.5042	0.3617	-+++++-	0.8456	0.3857	0.02835		0.5056	0.3937	--+----	-+++++-	-0.7708	0.2337	0.7122	0.3206	-0.05376	0.004243
	HIS	SBP	LIGHTvsNEVER	FEMALE	8	95543831	8:95543831:A_C	rs6471542	A	C	9004	2709	6	0.4965	0.9005	--+---	-0.7193	0.2359	0.002296	0.5079	0.5451	-++++-	1.2049	0.5698	0.03447		0.5009	0.7326	--+---	-++++-	-0.9538	0.2765	0.9122	0.5095	-0.07435	0.002601
	HIS	SBP	LIGHTvsNEVER	MALE	8	95543831	8:95543831:A_C	rs6471542	A	C	9244	7536	5	0.5051	0.1804	-+---	-0.083	0.2272	0.7147	0.5008	0.3245	-++++	-0.0386	0.6053	0.9491		0.5085	0.2057	+----	-++++	-0.1213	0.4677	0.04986	0.5321	-0.2171	0.932
	HIS	DBP	CURDRINK	COMBINED	9	133232115	9:133232115:C_T	rs12341695	T	C	35217	13075	6	0.9406	0.3615	--??---?-	-0.5773	0.1688	0.000628	0.937	0.1103	++??+-+?+	0.4785	0.3491	0.1704		0.9441	0.1509	--??---?-	++??+-+?+	-0.7574	0.2018	0.5069	0.3362	-0.03765	0.0007286
	HIS	DBP	CURDRINK	FEMALE	9	133232115	9:133232115:C_T	rs12341695	T	C	13456	3608	5	0.9274	0.2684	-???----	-1.1663	0.2617	8.28e-06	0.9257	0.6157	+???--++	0.5747	0.5611	0.3057		0.933	0.4705	-???----	+???--++	-1.351	0.2986	0.6372	0.5467	-0.07946	1.98e-05
	HIS	DBP	CURDRINK	MALE	9	133232115	9:133232115:C_T	rs12341695	T	C	18128	8906	4	0.9401	0.6702	-???+-+?	-0.0231	0.2597	0.929	0.9402	0.6666	+???---?	-0.5941	0.4882	0.2238		0.9464	0.7847	-???+-+?	+???---?	0.2762	0.3459	-0.5977	0.4855	-0.1132	0.4743
	HIS	DBP	HEAVYvsLIGHT	COMBINED	9	133232115	9:133232115:C_T	rs12341695	T	C	9889	1474	2	0.9399	0.994	??--??	-0.4335	0.3274	0.1856	0.9376	0.8176	??--??	-0.3635	0.9051	0.6879		0.946	0.9703	??--??	??--??	-0.3916	0.3544	-0.3625	0.8817	-0.1113	0.3747
	HIS	DBP	HEAVYvsLIGHT	MALE	9	133232115	9:133232115:C_T	rs12341695	T	C	7794	1209	2	0.9451	0.7243	??--?	-0.3058	0.3871	0.4295	0.943	0.8602	??+-?	-0.0338	1.0613	0.9746		0.95	0.907	??--?	??+-?	-0.312	0.4211	-0.009297	1.034	-0.1574	0.7272
	HIS	DBP	LIGHTvsNEVER	COMBINED	9	133232115	9:133232115:C_T	rs12341695	T	C	15158	9348	4	0.9416	0.1098	??---?-	-1.1036	0.2633	2.77e-05	0.9378	0.0122	??+-+?+	1.4497	0.5754	0.01176		0.9465	0.03175	??-+-?-	??+-+?+	-2.132	0.4176	1.644	0.52	-0.168	1.01e-06
	HIS	DBP	LIGHTvsNEVER	FEMALE	9	133232115	9:133232115:C_T	rs12341695	T	C	6001	1733	2	0.9388	0.3489	????--	-2.4855	0.399	4.66e-10	0.9366	0.5724	????++	2.6583	0.7961	0.0008403	0.0189067	0.945	0.202	????--	????++	-3.357	0.4874	2.349	0.775	-0.2206	2.4e-11
	HIS	DBP	LIGHTvsNEVER	MALE	9	133232115	9:133232115:C_T	rs12341695	T	C	7617	6589	2	0.9443	0.7854	??-+?	-0.0182	0.3817	0.962	0.9411	0.2964	??--?	-1.893	1.0657	0.07568		0.9492	0.5676	??++?	??--?	1.628	0.9653	-1.898	1.039	-0.9189	0.1885
	HIS	PP	CURDRINK	COMBINED	9	133232115	9:133232115:C_T	rs12341695	T	C	35217	13075	6	0.9374	0.9009	++??--+?+	0.2072	0.2049	0.312	0.9348	0.2681	++??--+?+	0.391	0.4011	0.3296		0.9441	0.6152	+-??+++?-	++??--+?+	0.07244	0.2409	0.3401	0.3935	-0.05336	0.4372
	HIS	PP	CURDRINK	FEMALE	9	133232115	9:133232115:C_T	rs12341695	T	C	13456	3608	5	0.9289	0.874	-???---+	-0.2104	0.3038	0.4885	0.9268	0.4116	-???--++	0.4343	0.644	0.5001		0.933	0.7283	+???-+--	-???--++	-0.3055	0.3415	0.3334	0.6296	-0.1041	0.6662
	HIS	PP	CURDRINK	MALE	9	133232115	9:133232115:C_T	rs12341695	T	C	18128	8906	4	0.9384	0.1908	+???+-+?	0.6712	0.288	0.01979	0.9383	0.3464	+???---?	-0.2805	0.5333	0.5989		0.9464	0.2205	+???+++?	+???---?	0.8023	0.3799	-0.2632	0.5339	-0.1357	0.0517
	HIS	PP	HEAVYvsLIGHT	COMBINED	9	133232115	9:133232115:C_T	rs12341695	T	C	9889	1474	2	0.9365	0.1698	??-+??	0.3148	0.3398	0.3542	0.9341	0.1948	??+-??	0.0056	0.8876	0.9949		0.946	0.1609	??-+??	??+-??	0.2979	0.3636	0.08489	0.8814	-0.116	0.654
	HIS	PP	HEAVYvsLIGHT	MALE	9	133232115	9:133232115:C_T	rs12341695	T	C	7794	1209	2	0.9414	0.3294	??-+?	0.3394	0.4105	0.4083	0.9391	0.2716	??+-?	0.4448	1.0631	0.6757		0.95	0.3545	??-+?	??+-?	0.2293	0.4433	0.5136	1.052	-0.172	0.6701
	HIS	PP	LIGHTvsNEVER	COMBINED	9	133232115	9:133232115:C_T	rs12341695	T	C	15158	9348	4	0.94	0.7292	??---?+	-0.1948	0.2976	0.5127	0.9368	0.7162	??+++?+	1.8909	0.6304	0.002702		0.9465	0.4181	??---?-	??+++?+	-1.091	0.4637	1.388	0.5771	-0.2071	0.04215
	HIS	PP	LIGHTvsNEVER	FEMALE	9	133232115	9:133232115:C_T	rs12341695	T	C	6001	1733	2	0.9378	0.1407	????-+	-0.6788	0.4533	0.1343	0.9358	0.7415	????++	3.1282	0.893	0.0004599		0.945	0.08149	????--	????++	-1.713	0.5564	2.704	0.8722	-0.2878	0.002496
	HIS	PP	LIGHTvsNEVER	MALE	9	133232115	9:133232115:C_T	rs12341695	T	C	7617	6589	2	0.9408	0.1178	??-+?	0.3899	0.4007	0.3306	0.9381	0.2096	??+-?	-1.1599	1.0332	0.2616		0.9492	0.167	??-+?	??+-?	1.502	0.948	-1.324	1.027	-0.8846	0.2671
	HIS	SBP	CURDRINK	COMBINED	9	133232115	9:133232115:C_T	rs12341695	T	C	35222	13077	6	0.9384	0.7834	+-??---?-	-0.3734	0.2877	0.1943	0.9354	0.04727	++??--+?+	0.7487	0.5671	0.1868		0.9441	0.1933	--??-+-?-	++??--+?+	-0.6553	0.3397	0.7398	0.554	-0.1065	0.1522
	HIS	SBP	CURDRINK	FEMALE	9	133232115	9:133232115:C_T	rs12341695	T	C	13458	3608	5	0.9277	0.6671	-???----	-1.3436	0.4385	0.002179	0.9257	0.363	+???--++	0.9713	0.9282	0.2954		0.933	0.5779	-???----	+???--++	-1.613	0.4943	0.9319	0.9043	-0.2183	0.003942
	HIS	SBP	CURDRINK	MALE	9	133232115	9:133232115:C_T	rs12341695	T	C	18131	8908	4	0.9398	0.2895	+???+-+?	0.6134	0.4098	0.1344	0.9396	0.3003	+???---?	-0.8809	0.7655	0.2498		0.9464	0.2668	-???+++?	+???---?	1.05	0.5432	-0.8742	0.7644	-0.2784	0.1528
	HIS	SBP	HEAVYvsLIGHT	COMBINED	9	133232115	9:133232115:C_T	rs12341695	T	C	9891	1474	2	0.9389	0.3366	??-+??	-0.2193	0.5043	0.6636	0.936	0.2735	??+-??	-0.2131	1.3432	0.874		0.946	0.3253	??-+??	??+-??	-0.2151	0.5403	-0.1145	1.331	-0.2577	0.8972
	HIS	SBP	HEAVYvsLIGHT	MALE	9	133232115	9:133232115:C_T	rs12341695	T	C	7796	1209	2	0.9438	0.3687	??-+?	-0.0429	0.5969	0.9427	0.941	0.3646	??+-?	0.5768	1.5766	0.7145		0.9501	0.4436	??-+?	??+-?	-0.1698	0.6446	0.6852	1.559	-0.3665	0.9028
	HIS	SBP	LIGHTvsNEVER	COMBINED	9	133232115	9:133232115:C_T	rs12341695	T	C	15160	9350	4	0.9409	0.8548	??---?-	-1.3386	0.4233	0.001565	0.9372	0.07918	??+-+?+	3.3676	0.916	0.0002365		0.9465	0.1937	??-+-?-	??+-+?+	-3.279	0.6755	3.016	0.8352	-0.4401	7.33e-06
	HIS	SBP	LIGHTvsNEVER	FEMALE	9	133232115	9:133232115:C_T	rs12341695	T	C	6001	1733	2	0.9379	0.1208	????--	-3.1629	0.6585	1.57e-06	0.9359	0.9464	????++	5.7369	1.2966	9.67e-06	0.00105392	0.945	0.04414	????--	????++	-5.09	0.8064	5.038	1.266	-0.6045	2.13e-09
	HIS	SBP	LIGHTvsNEVER	MALE	9	133232115	9:133232115:C_T	rs12341695	T	C	7619	6591	2	0.9426	0.2051	??-+?	0.2646	0.5773	0.6468	0.9394	0.8464	??--?	-2.7025	1.5486	0.08097		0.9492	0.5734	??++?	??--?	2.753	1.411	-2.886	1.524	-1.961	0.1435
	ALL	DBP	CURDRINK	COMBINED	10	20502180	10:20502180:A_G	rs150916804	A	G	83624	35489	2	0.9823	0.6538	+???-?	0.0457	0.235	0.8459	0.9822	0.662	+???+?	0.6264	0.4744	0.1867		0.9848	0.8084	-???-?	+???-?	-0.1712	0.3066	0.5347	0.4726	-0.09382	0.5138
	ALL	DBP	CURDRINK	MALE	10	20502180	10:20502180:A_G	rs150916804	A	G	49245	23466	2	0.983	0.925	+???+?	0.1306	0.3271	0.6898	0.9831	0.5561	+???-?	-0.0218	0.6562	0.9736		0.986	0.8196	-???+?	+???-?	0.06947	0.4423	0.06613	0.6515	-0.1953	0.949
	ALL	DBP	LIGHTvsNEVER	COMBINED	10	20502180	10:20502180:A_G	rs150916804	A	G	32592	17716	2	0.9821	0.4188	+??-?	-0.077	0.3627	0.8319	0.9822	0.3835	+??+?	3.384	0.8337	4.933e-05		0.9829	0.3017	-??-?	+??+?	-1.434	0.5323	2.575	0.7237	-0.2831	0.001769
	ALL	PP	CURDRINK	COMBINED	10	20502180	10:20502180:A_G	rs150916804	A	G	83623	35489	2	0.9826	0.3368	-???+?	-0.2257	0.2817	0.4232	0.9826	0.4755	+???+?	0.5142	0.5633	0.3613		0.9848	0.4559	-???-?	+???+?	-0.4383	0.3619	0.5267	0.5623	-0.1307	0.4701
	ALL	PP	CURDRINK	MALE	10	20502180	10:20502180:A_G	rs150916804	A	G	49244	23466	2	0.9834	0.3658	+???+?	0.5693	0.3783	0.1324	0.9835	0.2051	-???+?	0.0594	0.7564	0.9374		0.986	0.3376	+???+?	-???+?	0.4264	0.5156	0.2947	0.7494	-0.2653	0.2965
	ALL	PP	LIGHTvsNEVER	COMBINED	10	20502180	10:20502180:A_G	rs150916804	A	G	32591	17716	2	0.9824	0.8601	-??-?	-0.7017	0.4245	0.09834	0.9827	0.6202	+??+?	3.4126	0.9784	0.0004864		0.9829	0.6965	-??-?	+??+?	-2.053	0.6072	2.571	0.8411	-0.3684	0.002212
	ALL	SBP	CURDRINK	COMBINED	10	20502180	10:20502180:A_G	rs150916804	A	G	83633	35494	2	0.9825	0.764	-???+?	-0.1097	0.3954	0.7814	0.9825	0.941	+???+?	1.5383	0.7943	0.05277		0.9848	0.9127	-???-?	+???+?	-0.6894	0.5114	1.432	0.7928	-0.2611	0.1899
	ALL	SBP	CURDRINK	MALE	10	20502180	10:20502180:A_G	rs150916804	A	G	49250	23471	2	0.9831	0.5115	+???+?	0.6369	0.5301	0.2296	0.9832	0.7058	+???+?	0.5494	1.0638	0.6056		0.986	0.7718	+???+?	+???+?	0.2256	0.7191	0.8434	1.056	-0.5161	0.3679
	ALL	SBP	LIGHTvsNEVER	COMBINED	10	20502180	10:20502180:A_G	rs150916804	A	G	32597	17721	2	0.9822	0.626	-??-?	-0.6308	0.5993	0.2925	0.9824	0.5627	+??+?	7.7637	1.3721	1.53e-08	0.0496224	0.9829	0.4003	-??-?	+??+?	-3.683	0.8717	5.745	1.19	-0.7593	5.217e-06
	EAS	DBP	CURDRINK	COMBINED	12	111681367	12:111681367:C_T	rs11066001	T	C	173613	75691	9	0.8078	0.0006664	+??+?+-+-?+++	0.8543	0.05728	2.475e-50	0.8066	0.03136	+??+?+-++?+--	1.3217	0.1274	3.15e-25	2.51487e-18	0.8091	0.008245	+??+?+---?+++	+??+?+-++?+--	0.2932	0.06438	1.285	0.1262	-0.004111	7.373e-47
	EAS	DBP	CURDRINK	FEMALE	12	111681367	12:111681367:C_T	rs11066001	T	C	81738	20010	4	0.8244	0.1101	++++	0.4147	0.0807	2.783e-07	0.8103	0.2149	+++-	1.0768	0.2701	6.717e-05	0.0309763	0.8222	0.08044	++++	+++-	0.242	0.0834	1.104	0.2628	-0.006894	1.556e-08
	EAS	DBP	CURDRINK	MALE	12	111681367	12:111681367:C_T	rs11066001	T	C	88090	55285	7	0.8009	5.774e-09	+??+?+-+?+-	1.3076	0.07755	7.847e-64	0.8027	0.1541	+??-?+-+?+-	1.243	0.1591	5.721e-15	4.63043e-08	0.8011	0.001177	+??+?+-+?++	+??-?+-+?+-	0.3692	0.1051	1.216	0.1582	-0.01097	9.513e-40
	EAS	DBP	HEAVYvsLIGHT	COMBINED	12	111681367	12:111681367:C_T	rs11066001	T	C	74727	25346	4	0.8809	0.0005358	++?+-	1.5754	0.1128	2.349e-44	0.8759	0.5712	--?+-	-0.082	0.2558	0.7486		0.883	0.009314	++?+-	--?+-	1.391	0.1251	-0.02211	0.2546	-0.01555	3.445e-34
	EAS	DBP	HEAVYvsLIGHT	MALE	12	111681367	12:111681367:C_T	rs11066001	T	C	54774	19530	4	0.8702	0.001055	++?+-	1.5796	0.1231	1.098e-37	0.8657	0.9163	-+?+-	-0.1998	0.2797	0.4749		0.8703	0.03568	++?+-	-+?+-	1.416	0.138	-0.1801	0.2794	-0.01891	3.77e-28
	EAS	DBP	HEAVYvsNEVER	COMBINED	12	111681367	12:111681367:C_T	rs11066001	T	C	102531	25207	3	0.7926	0.8842	+??++	0.8829	0.06827	3.112e-38	0.7708	0.02435	+??+-	1.0284	0.2439	2.475e-05	0.0243872	0.7906	0.102	+??++	+??+-	0.3512	0.07297	1.031	0.2381	-0.005255	2.825e-13
	EAS	DBP	HEAVYvsNEVER	FEMALE	12	111681367	12:111681367:C_T	rs11066001	T	C	63845	5733	2	0.8041	0.2508	++?	0.3343	0.08612	0.0001041	0.7672	0.5481	++?	1.6368	0.5429	0.002568		0.8014	0.6311	++?	++?	0.2071	0.08715	1.716	0.5366	-0.007519	9.183e-05
	EAS	DBP	HEAVYvsNEVER	MALE	12	111681367	12:111681367:C_T	rs11066001	T	C	38495	19397	3	0.775	5.647e-05	+??++	1.5274	0.1048	4.477e-48	0.7678	0.276	+??+-	0.9746	0.2907	0.000798		0.7729	0.04234	+??++	+??+-	0.5396	0.1337	0.7445	0.2794	-0.01768	7.257e-10
	EAS	DBP	LIGHTvsNEVER	COMBINED	12	111681367	12:111681367:C_T	rs11066001	T	C	128588	49480	6	0.7951	0.5152	++-++?+	0.6813	0.06286	2.091e-27	0.7875	0.08283	+++++?-	1.0823	0.1469	1.72e-13	5.27778e-07	0.7939	0.1297	++--+?+	+++++?-	0.3295	0.07087	1.057	0.1442	-0.004978	6.228e-30
	EAS	DBP	LIGHTvsNEVER	FEMALE	12	111681367	12:111681367:C_T	rs11066001	T	C	72273	14047	3	0.8152	0.5502	+++	0.2802	0.08294	0.0007356	0.7969	0.116	++-	0.776	0.3069	0.01144		0.8129	0.257	+++	++-	0.2067	0.08442	0.8247	0.2969	-0.007066	9.669e-05
	EAS	DBP	LIGHTvsNEVER	MALE	12	111681367	12:111681367:C_T	rs11066001	T	C	55079	35272	5	0.7727	0.0009368	++-+-	1.1285	0.08951	1.818e-36	0.7741	0.09549	++-+-	1.0138	0.1945	1.859e-07	7.06065e-05	0.7708	0.006406	++-++	++-+-	0.5064	0.1299	0.919	0.1891	-0.01677	3.903e-26
	EAS	PP	CURDRINK	COMBINED	12	111681367	12:111681367:C_T	rs11066001	T	C	173587	75682	9	0.8143	0.01136	+??+?+-+-?++-	0.4447	0.05714	7.036e-15	0.8116	0.3301	+??+?+-+-?-++	1.0308	0.1324	6.808e-15	9.37121e-09	0.8091	0.01549	+??+?+---?+--	+??+?+-+-?-++	0.1847	0.06463	1.043	0.1303	-0.004145	1.762e-26
	EAS	PP	CURDRINK	FEMALE	12	111681367	12:111681367:C_T	rs11066001	T	C	81728	20006	4	0.8287	0.05162	-++-	-0.0773	0.07841	0.3243	0.8142	0.3822	+-++	0.4821	0.2803	0.08538		0.8222	0.4009	-++-	+-++	0.007584	0.08058	0.356	0.2669	-0.006438	0.3598
	EAS	PP	CURDRINK	MALE	12	111681367	12:111681367:C_T	rs11066001	T	C	88079	55280	7	0.8056	1.156e-05	+??+?+--?+-	0.9992	0.08031	1.664e-35	0.8073	0.4572	+??+?++-?--	0.8492	0.1685	4.682e-07	0.000268798	0.8011	0.002534	+??-?+--?+-	+??+?++-?--	0.4995	0.1097	0.9114	0.1663	-0.01196	2.755e-31
	EAS	PP	HEAVYvsLIGHT	COMBINED	12	111681367	12:111681367:C_T	rs11066001	T	C	74718	25344	4	0.8856	0.0001228	++?+-	1.2555	0.1135	1.918e-28	0.8796	0.2737	++?--	-0.1378	0.2619	0.5988		0.883	0.0007115	++?+-	++?--	1.102	0.1259	0.0262	0.2608	-0.01576	8.556e-22
	EAS	PP	HEAVYvsLIGHT	MALE	12	111681367	12:111681367:C_T	rs11066001	T	C	54769	19530	4	0.8745	0.0004474	++?+-	1.4345	0.1258	4.419e-30	0.8691	0.5104	++?--	-0.1429	0.2926	0.6252		0.8703	0.007079	++?+-	++?--	1.265	0.1416	-0.009866	0.2912	-0.01993	1.075e-22
	EAS	PP	HEAVYvsNEVER	COMBINED	12	111681367	12:111681367:C_T	rs11066001	T	C	102521	25205	3	0.7984	0.06587	+??+-	0.4285	0.06717	1.765e-10	0.7753	0.07696	+??+-	0.8474	0.2596	0.001099		0.7906	0.04421	+??+-	+??+-	0.2	0.07112	0.9099	0.2512	-0.004997	6.68e-07
	EAS	PP	HEAVYvsNEVER	FEMALE	12	111681367	12:111681367:C_T	rs11066001	T	C	63837	5731	2	0.8099	0.0678	-+?	-0.0027	0.08418	0.9749	0.7718	0.3094	+-?	0.6847	0.589	0.245		0.8014	0.5017	-+?	+-?	0.03321	0.08326	0.6191	0.5783	-0.006867	0.4828
	EAS	PP	HEAVYvsNEVER	MALE	12	111681367	12:111681367:C_T	rs11066001	T	C	38493	19397	3	0.7787	0.009887	+??+-	1.0874	0.1065	1.779e-24	0.7709	0.1546	+??--	0.5354	0.3106	0.08474		0.7729	0.06188	+??+-	+??--	0.5763	0.1347	0.6532	0.2961	-0.01796	2.896e-09
	EAS	PP	LIGHTvsNEVER	COMBINED	12	111681367	12:111681367:C_T	rs11066001	T	C	128569	49473	6	0.8016	0.09296	++-+-?-	0.2998	0.06184	1.243e-06	0.7932	0.2768	++-+-?+	0.8734	0.1514	7.91e-09	0.00898853	0.7939	0.02726	++-++?-	++-+-?+	0.1936	0.06977	0.8661	0.1475	-0.004828	3.549e-16
	EAS	PP	LIGHTvsNEVER	FEMALE	12	111681367	12:111681367:C_T	rs11066001	T	C	72265	14045	3	0.8213	0.03404	-+-	-0.083	0.08096	0.3053	0.803	0.6824	+++	0.3073	0.3186	0.3348		0.8129	0.695	-+-	+++	0.02794	0.0823	0.1938	0.3022	-0.006719	0.7065
	EAS	PP	LIGHTvsNEVER	MALE	12	111681367	12:111681367:C_T	rs11066001	T	C	55070	35267	5	0.7771	0.002763	++---	0.7793	0.09151	1.682e-17	0.7786	0.5967	+++-+	0.6314	0.2011	0.001697		0.7708	0.01877	++---	+++-+	0.5278	0.1305	0.7131	0.1941	-0.01693	1.072e-19
	EAS	SBP	CURDRINK	COMBINED	12	111681367	12:111681367:C_T	rs11066001	T	C	173636	75697	9	0.8102	0.0001389	+??+?+-+-?++-	1.3186	0.09132	2.758e-47	0.8081	0.3051	+??+?+-+-?++-	2.4005	0.2	3.47e-33	1.23902e-26	0.8091	0.006757	+??+?+---?++-	+??+?+-+-?++-	0.487	0.1011	2.38	0.1991	-0.01014	3.357e-60
	EAS	SBP	CURDRINK	FEMALE	12	111681367	12:111681367:C_T	rs11066001	T	C	81733	20008	4	0.8252	0.1756	++++	0.3077	0.1274	0.01572	0.8109	0.7095	++++	1.5954	0.4254	0.0001767		0.8222	0.4327	+++-	++++	0.2343	0.1292	1.501	0.4101	-0.01654	1.476e-05
	EAS	SBP	CURDRINK	MALE	12	111681367	12:111681367:C_T	rs11066001	T	C	88106	55291	7	0.8025	6.159e-10	+??+?+--?+-	2.3353	0.122	1.284e-81	0.8041	0.307	+??+?+--?+-	2.1442	0.2501	1.017e-17	8.23136e-11	0.8011	0.0008693	+??+?+--?+-	+??+?+--?+-	0.8813	0.1646	2.185	0.2482	-0.02692	1.646e-61
	EAS	SBP	HEAVYvsLIGHT	COMBINED	12	111681367	12:111681367:C_T	rs11066001	T	C	74724	25348	4	0.8822	2.479e-05	++?+-	2.8836	0.1753	8.994e-61	0.8766	0.4736	-+?--	-0.1708	0.3932	0.664		0.883	0.0002789	++?+-	-+?--	2.537	0.1928	0.02776	0.3931	-0.03698	7.334e-48
	EAS	SBP	HEAVYvsLIGHT	MALE	12	111681367	12:111681367:C_T	rs11066001	T	C	54773	19533	4	0.8713	0.0002394	++?+-	3.0723	0.1908	2.497e-58	0.8663	0.7566	-+?--	-0.3015	0.4307	0.4839		0.8703	0.004324	++?+-	-+?--	2.727	0.2127	-0.168	0.4314	-0.04498	1.911e-44
	EAS	SBP	HEAVYvsNEVER	COMBINED	12	111681367	12:111681367:C_T	rs11066001	T	C	102529	25209	3	0.7939	0.4618	+??+-	1.3175	0.1082	3.928e-34	0.772	0.04924	+??+-	1.9536	0.3832	3.428e-07	0.000338295	0.7906	0.1271	+??++	+??+-	0.555	0.113	2.016	0.3753	-0.01261	2.534e-16
	EAS	SBP	HEAVYvsNEVER	FEMALE	12	111681367	12:111681367:C_T	rs11066001	T	C	63841	5732	2	0.8052	0.6315	++?	0.3058	0.1364	0.02503	0.7682	0.8308	++?	2.3866	0.8591	0.005471		0.8014	0.9743	++?	++?	0.229	0.1349	2.401	0.8453	-0.01802	0.001854
	EAS	SBP	HEAVYvsNEVER	MALE	12	111681367	12:111681367:C_T	rs11066001	T	C	38497	19400	3	0.776	0.002152	+??+-	2.6471	0.1632	3.578e-59	0.7686	0.1063	+??+-	1.5783	0.4559	0.0005376		0.7729	0.1424	+??++	+??+-	1.139	0.2068	1.454	0.4374	-0.04235	1.286e-16
	EAS	SBP	LIGHTvsNEVER	COMBINED	12	111681367	12:111681367:C_T	rs11066001	T	C	128606	49484	6	0.7965	0.1723	++-++?-	0.9866	0.09909	2.318e-23	0.7885	0.2198	++-+-?-	1.9895	0.2305	6.01e-18	9.56292e-12	0.7939	0.0418	++-++?+	++-+-?-	0.5321	0.1102	1.969	0.226	-0.01203	9.065e-38
	EAS	SBP	LIGHTvsNEVER	FEMALE	12	111681367	12:111681367:C_T	rs11066001	T	C	72269	14046	3	0.8162	0.3145	-++	0.1716	0.1308	0.1896	0.7976	0.439	++-	1.1096	0.4839	0.02186		0.8129	0.7115	+++	++-	0.2256	0.1308	1.049	0.4625	-0.01696	0.004306
	EAS	SBP	LIGHTvsNEVER	MALE	12	111681367	12:111681367:C_T	rs11066001	T	C	55092	35275	5	0.7737	0.000124	++-+-	1.9245	0.1395	2.815e-43	0.7751	0.2	+++--	1.6753	0.3031	3.27e-08	1.90314e-05	0.7708	0.006316	++-+-	+++--	1.051	0.2003	1.671	0.2934	-0.03987	1.006e-39
	EAS	DBP	CURDRINK	COMBINED	12	112838931	12:112838931:A_G	rs4766660	A	G	177130	76414	13	0.4067	0.5471	---+--+-+++++	-0.2379	0.04438	8.115e-08	0.4062	0.4127	-+-++-+--++--	-0.1841	0.0849	0.03016		0.4096	0.5226	---+--+-+++++	-+-++-+--++--	-0.08643	0.05339	-0.1951	0.08445	-0.002849	5.477e-05
	EAS	DBP	CURDRINK	FEMALE	12	112838931	12:112838931:A_G	rs4766660	A	G	81738	20010	4	0.3958	0.2209	-+--	-0.1401	0.06191	0.02361	0.401	0.7003	----	-0.1925	0.1452	0.185		0.3997	0.5091	-+-+	----	-0.07824	0.06686	-0.1904	0.1438	-0.00447	0.05994
	EAS	DBP	CURDRINK	MALE	12	112838931	12:112838931:A_G	rs4766660	A	G	89760	55949	11	0.4136	0.1694	-+-+--+-+++	-0.3472	0.06033	8.774e-09	0.4128	0.437	-+-++-+-+++	-0.1558	0.12	0.194		0.4163	0.345	-++---++---	-+-++-+-+++	-0.09829	0.09272	-0.1767	0.1191	-0.008594	0.0009274
	EAS	DBP	HEAVYvsLIGHT	COMBINED	12	112838931	12:112838931:A_G	rs4766660	A	G	75172	25476	5	0.3725	0.4302	-++-+	-0.2844	0.06762	2.625e-05	0.3734	0.8795	+++++	0.3261	0.1382	0.01826		0.3759	0.7245	-++--	+++++	-0.35	0.07905	0.3092	0.1383	-0.006245	7.64e-05
	EAS	DBP	HEAVYvsLIGHT	FEMALE	12	112838931	12:112838931:A_G	rs4766660	A	G	19857	5810	3	0.3532	0.3298	---	-0.2643	0.1286	0.03988	0.358	0.2335	+-+	0.1919	0.2932	0.5128		0.3565	0.2623	---	+-+	-0.3189	0.1492	0.2211	0.2838	-0.02224	0.09774
	EAS	DBP	HEAVYvsLIGHT	MALE	12	112838931	12:112838931:A_G	rs4766660	A	G	55204	19656	5	0.3795	0.1017	-++-+	-0.2791	0.07744	0.0003133	0.3796	0.8775	+++++	0.3331	0.1565	0.03324		0.3829	0.3193	-++-+	+++++	-0.3421	0.09244	0.306	0.1572	-0.008537	0.001255
	EAS	DBP	HEAVYvsNEVER	COMBINED	12	112838931	12:112838931:A_G	rs4766660	A	G	103581	25378	5	0.4122	0.8151	----+	-0.2842	0.05542	2.945e-07	0.423	0.479	++-++	0.1202	0.1353	0.3741		0.4163	0.644	----+	++-++	-0.1574	0.06025	0.09722	0.1309	-0.003628	0.03216
	EAS	DBP	HEAVYvsNEVER	FEMALE	12	112838931	12:112838931:A_G	rs4766660	A	G	64036	5810	3	0.405	0.8679	---	-0.1289	0.06829	0.05898	0.4279	0.3069	+--	-0.0149	0.2635	0.955		0.4095	0.6134	--+	+--	-0.1033	0.06988	0.01528	0.2557	-0.00488	0.3178
	EAS	DBP	HEAVYvsNEVER	MALE	12	112838931	12:112838931:A_G	rs4766660	A	G	38850	19542	5	0.4242	0.5097	-+--+	-0.4718	0.08855	1.004e-07	0.4242	0.5217	+--++	0.2134	0.1803	0.2367		0.4276	0.5093	-+---	+--++	-0.2237	0.1204	0.1657	0.1763	-0.01449	0.1672
	EAS	DBP	LIGHTvsNEVER	COMBINED	12	112838931	12:112838931:A_G	rs4766660	A	G	129493	49541	7	0.4114	0.5672	--+--+-	-0.2503	0.05008	5.837e-07	0.4132	0.8859	--+-+--	-0.1863	0.1008	0.06461		0.4152	0.8681	--+--++	--+-+--	-0.141	0.05873	-0.2065	0.09922	-0.003446	8.452e-06
	EAS	DBP	LIGHTvsNEVER	FEMALE	12	112838931	12:112838931:A_G	rs4766660	A	G	72273	14047	3	0.3987	0.4531	---	-0.1418	0.06454	0.02792	0.4047	0.6252	---	-0.1766	0.1651	0.2847		0.4031	0.7772	--+	---	-0.1027	0.06772	-0.207	0.1634	-0.004586	0.0395
	EAS	DBP	LIGHTvsNEVER	MALE	12	112838931	12:112838931:A_G	rs4766660	A	G	55079	35272	5	0.4258	0.2138	--+-+	-0.3956	0.07401	8.872e-08	0.4224	0.6068	--+++	-0.1064	0.1536	0.4885		0.4293	0.5013	--+-+	--+++	-0.223	0.118	-0.1182	0.1503	-0.01391	0.0002678
	EAS	PP	CURDRINK	COMBINED	12	112838931	12:112838931:A_G	rs4766660	A	G	177104	76405	13	0.4016	0.232	---++-+--++-+	-0.1304	0.04384	0.002922	0.4016	0.3988	-+-+++----+--	-0.171	0.0862	0.04722		0.4096	0.224	+--+--++-++-+	-+-+++----+--	-0.05792	0.05295	-0.1729	0.0853	-0.002802	0.001925
	EAS	PP	CURDRINK	FEMALE	12	112838931	12:112838931:A_G	rs4766660	A	G	81728	20006	4	0.3923	0.02034	++-+	-0.0106	0.0598	0.8593	0.3973	0.1399	-+--	-0.0886	0.1463	0.5446		0.3997	0.059	++-+	-+--	-0.04129	0.06415	-0.02165	0.1421	-0.004115	0.719
	EAS	PP	CURDRINK	MALE	12	112838931	12:112838931:A_G	rs4766660	A	G	89749	55944	11	0.4092	0.01088	--+-+-+--++	-0.2594	0.06208	2.939e-05	0.408	0.5525	-+---+---+-	-0.1779	0.1254	0.156		0.4163	0.05898	--+++-++-++	-+---+---+-	-0.0761	0.09622	-0.2127	0.1237	-0.009255	0.0009459
	EAS	PP	HEAVYvsLIGHT	COMBINED	12	112838931	12:112838931:A_G	rs4766660	A	G	75163	25474	5	0.3685	0.07929	-++-+	-0.235	0.06705	0.0004524	0.3698	0.3263	+--+-	0.4328	0.138	0.001716		0.3759	0.06993	-++-+	+--+-	-0.3338	0.07837	0.3827	0.1383	-0.006138	0.0001413
	EAS	PP	HEAVYvsLIGHT	FEMALE	12	112838931	12:112838931:A_G	rs4766660	A	G	19853	5808	3	0.3504	0.6307	+--	-0.0788	0.1211	0.5154	0.3542	0.3688	-++	-0.1961	0.2823	0.4872		0.3565	0.4762	+--	-++	-0.04143	0.1396	-0.1194	0.2723	-0.01946	0.7598
	EAS	PP	HEAVYvsLIGHT	MALE	12	112838931	12:112838931:A_G	rs4766660	A	G	55199	19656	5	0.3758	0.01657	-+--+	-0.3013	0.07818	0.0001152	0.3762	0.09692	+--+-	0.6017	0.16	0.0001702		0.3829	0.006645	-+--+	+--+-	-0.4586	0.09388	0.5518	0.1603	-0.008806	6.703e-06
	EAS	PP	HEAVYvsNEVER	COMBINED	12	112838931	12:112838931:A_G	rs4766660	A	G	103571	25376	5	0.4073	0.3361	----+	-0.1323	0.05412	0.01447	0.4177	0.3913	++-+-	0.1697	0.1384	0.22		0.4163	0.3672	----+	++-+-	-0.1103	0.05825	0.1645	0.1332	-0.003392	0.1546
	EAS	PP	HEAVYvsNEVER	FEMALE	12	112838931	12:112838931:A_G	rs4766660	A	G	64028	5808	3	0.4004	0.006083	+-+	-0.0627	0.06623	0.3436	0.4216	0.6712	---	-0.2156	0.2719	0.4277		0.4095	0.04304	+-+	---	-0.073	0.06616	-0.08101	0.2634	-0.004375	0.4534
	EAS	PP	HEAVYvsNEVER	MALE	12	112838931	12:112838931:A_G	rs4766660	A	G	38848	19542	5	0.4197	0.51	--+-+	-0.2249	0.08962	0.01209	0.4198	0.1797	++-+-	0.3714	0.1859	0.04575		0.4276	0.2643	--+-+	++-+-	-0.1807	0.1208	0.2978	0.1809	-0.01459	0.2265
	EAS	PP	LIGHTvsNEVER	COMBINED	12	112838931	12:112838931:A_G	rs4766660	A	G	129474	49534	7	0.406	0.03611	--+++-+	-0.1478	0.04897	0.002554	0.4085	0.445	---++--	-0.2334	0.102	0.02207		0.4152	0.04015	--+++-+	---++--	-0.09263	0.05742	-0.2389	0.09967	-0.003295	9.476e-05
	EAS	PP	LIGHTvsNEVER	FEMALE	12	112838931	12:112838931:A_G	rs4766660	A	G	72265	14045	3	0.3944	0.03595	+-+	-0.0305	0.06251	0.6256	0.4001	0.09228	+--	-0.0087	0.1664	0.9583		0.4031	0.0723	+-+	+--	-0.07343	0.06551	0.0291	0.1619	-0.004292	0.5102
	EAS	PP	LIGHTvsNEVER	MALE	12	112838931	12:112838931:A_G	rs4766660	A	G	55070	35267	5	0.4213	0.0001954	--+++	-0.3359	0.07539	8.355e-06	0.4179	0.8629	---++	-0.2063	0.1569	0.1884		0.4292	0.001955	--+++	---++	-0.1468	0.118	-0.3023	0.1524	-0.01393	1.228e-05
	EAS	SBP	CURDRINK	COMBINED	12	112838931	12:112838931:A_G	rs4766660	A	G	177153	76420	13	0.4051	0.2038	---+--+--++-+	-0.3734	0.07034	1.12e-07	0.4049	0.2329	-+-++-+---+--	-0.3774	0.1324	0.00437		0.4096	0.1334	---+--+++++-+	-+-++-+---+--	-0.1432	0.08339	-0.3881	0.1323	-0.00695	1.224e-06
	EAS	SBP	CURDRINK	FEMALE	12	112838931	12:112838931:A_G	rs4766660	A	G	81733	20008	4	0.3953	0.03186	++--	-0.1275	0.09757	0.1915	0.4005	0.2076	-+--	-0.2876	0.2277	0.2066		0.3997	0.08018	++-+	-+--	-0.1024	0.1034	-0.2138	0.2235	-0.0107	0.1801
	EAS	SBP	CURDRINK	MALE	12	112838931	12:112838931:A_G	rs4766660	A	G	89776	55955	11	0.4122	0.0113	-++-+-+--++	-0.6278	0.0945	3.144e-11	0.4112	0.3778	-+-++-+-+++	-0.344	0.1874	0.06636		0.4163	0.05048	--++--++-++	-+-++-+-+++	-0.1957	0.1445	-0.3966	0.1857	-0.02088	2.16e-06
	EAS	SBP	HEAVYvsLIGHT	COMBINED	12	112838931	12:112838931:A_G	rs4766660	A	G	75169	25478	5	0.3713	0.08178	-++-+	-0.5339	0.1045	3.292e-07	0.3728	0.8405	+-+++	0.7641	0.2112	0.0002962		0.3759	0.1854	-++-+	+-+++	-0.7021	0.1212	0.6997	0.2121	-0.01468	1.121e-07
	EAS	SBP	HEAVYvsLIGHT	FEMALE	12	112838931	12:112838931:A_G	rs4766660	A	G	19855	5809	3	0.3531	0.3302	---	-0.328	0.1939	0.09071	0.3575	0.6288	+-+	-0.0438	0.4472	0.922		0.3566	0.4873	---	+-+	-0.3289	0.2268	0.06357	0.4313	-0.0514	0.275
	EAS	SBP	HEAVYvsLIGHT	MALE	12	112838931	12:112838931:A_G	rs4766660	A	G	55203	19659	5	0.3785	0.01093	-++-+	-0.6058	0.1193	3.872e-07	0.379	0.7491	+-++-	0.9562	0.2396	6.566e-05	0.0120243	0.3829	0.0338	-++-+	+-++-	-0.8349	0.1419	0.8844	0.2412	-0.02012	5.735e-08
	EAS	SBP	HEAVYvsNEVER	COMBINED	12	112838931	12:112838931:A_G	rs4766660	A	G	103579	25380	5	0.4111	0.4874	----+	-0.4119	0.08767	2.639e-06	0.4216	0.3819	++-+-	0.2708	0.2105	0.1982		0.4163	0.3672	----+	++-+-	-0.2634	0.09319	0.2425	0.2047	-0.00868	0.02136
	EAS	SBP	HEAVYvsNEVER	FEMALE	12	112838931	12:112838931:A_G	rs4766660	A	G	64032	5809	3	0.4041	0.09723	+-+	-0.1769	0.108	0.1014	0.4263	0.63	---	-0.2669	0.4126	0.5177		0.4095	0.2654	+-+	---	-0.1624	0.108	-0.09878	0.4006	-0.01166	0.262
	EAS	SBP	HEAVYvsNEVER	MALE	12	112838931	12:112838931:A_G	rs4766660	A	G	38852	19545	5	0.423	0.5536	-++-+	-0.709	0.1377	2.644e-07	0.4231	0.3612	++-++	0.5913	0.2806	0.03505		0.4276	0.3539	-++-+	++-++	-0.4221	0.1861	0.4706	0.2739	-0.03464	0.07792
	EAS	SBP	LIGHTvsNEVER	COMBINED	12	112838931	12:112838931:A_G	rs4766660	A	G	129511	49545	7	0.4101	0.1177	--+---+	-0.4024	0.07902	3.474e-07	0.4123	0.6866	----+--	-0.4439	0.1576	0.004858		0.4152	0.2063	--++--+	----+--	-0.2313	0.09121	-0.4752	0.155	-0.008315	1.65e-08
	EAS	SBP	LIGHTvsNEVER	FEMALE	12	112838931	12:112838931:A_G	rs4766660	A	G	72269	14046	3	0.398	0.145	+--	-0.1496	0.1016	0.1408	0.4041	0.1787	---	-0.174	0.2594	0.5024		0.4031	0.262	+-+	---	-0.164	0.1048	-0.1609	0.2536	-0.01098	0.115
	EAS	SBP	LIGHTvsNEVER	MALE	12	112838931	12:112838931:A_G	rs4766660	A	G	55092	35275	5	0.4247	0.001484	--+-+	-0.7658	0.1153	3.079e-11	0.4212	0.6924	--+++	-0.3338	0.2385	0.1616		0.4293	0.01413	--+-+	--+++	-0.3939	0.1817	-0.4435	0.2324	-0.033	1.055e-08
	EUR	DBP	CURDRINK	COMBINED	14	72821222	14:72821222:A_T	rs8015900	A	T	839645	634806	60	0.2124	0.2995	------+++++--+-+?------++++-++---+--+++--++++---+---??+---+++--	-0.1091	0.02361	3.855e-06	0.2142	0.7471	++--++--++++--+-?+-++----++++--+----+----+-+-++--+--??+++---+--	-0.0221	0.0525	0.6736		0.2135	0.5628	--+---+++----+-+?-----+++-+-+++--++-++++-++-+--++-++??----++++-	++--++--++++--+-?+-++----++++--+----+----+-+-++--+--??+++---+--	-0.07357	0.04209	-0.04636	0.0483	-0.00177	6.474e-06
	EUR	DBP	CURDRINK	FEMALE	14	72821222	14:72821222:A_T	rs8015900	A	T	354719	274859	58	0.2103	0.3331	--+---++-++-++-+?----+--++-+-+--++-+++--++++----+-??++--+++--	-0.0971	0.03363	0.003887	0.209	0.9923	+++-+-++-+++---+?+-++++++-++--+--+-++--++--+---++-??++++--+-+	0.0125	0.0849	0.8833		0.2105	0.8992	------++++--++-+?----+--++---+--++--+++-+++--++-++??-+--++++-	+++-+-++-+++---+?+-++++++-++--+--+-++--++--+---++-??++++--+-+	-0.07747	0.06585	-0.02458	0.0745	-0.004332	0.01189
	EUR	DBP	CURDRINK	MALE	14	72821222	14:72821222:A_T	rs8015900	A	T	483174	358429	51	0.2146	0.1966	+-+-++++-+?--+-?-+-+--+-+-++----+++----++-+-+---??+--+-	-0.123	0.03003	4.17e-05	0.2175	0.2025	++---+-+++?+-+-?++-++--+++--++----+---+++-++-+--??+----	-0.0412	0.0679	0.5441		0.2157	0.1045	--+-+-++-+?---+?-----++---++----+++-+---+---+-++??---+-	++---+-+++?+-+-?++-++--+++--++----+---+++-++-+--??+----	-0.07643	0.05441	-0.05852	0.06293	-0.002957	0.000129
	EUR	DBP	HEAVYvsLIGHT	COMBINED	14	72821222	14:72821222:A_T	rs8015900	A	T	630697	175850	52	0.2116	0.8941	----+++?+-----?---+---?-++-?-+--++--+-++-------??++----+--	-0.1231	0.02674	4.062e-06	0.2162	0.1106	-+---+-?++--++?++--+++?+--+?+-+++-++++-+++-----??++--+--+-	-0.0324	0.0537	0.5466		0.2129	0.4096	--+-+++?+-++--?---+---?-++-?-+--++----++---++--??+----++--	-+---+-?++--++?++--+++?+--+?+-+++-++++-+++-----??++--+--+-	-0.1178	0.02744	-0.02332	0.05383	-0.0007517	6.114e-06
	EUR	DBP	HEAVYvsLIGHT	FEMALE	14	72821222	14:72821222:A_T	rs8015900	A	T	272744	72337	41	0.21	0.9846	+----++--??---+-+-+--+-++--++++---+?+----+--	-0.1075	0.03835	0.005042	0.2163	0.079	-+-+-++--??-+-++++--+-+--++++-++---?+-----++	-0.0756	0.0814	0.3531		0.2106	0.5456	+----+-+-??---+-+-+--+-++----++---+?---+++--	-+-+-++--??-+-++++--+-+--++++-++---?+-----++	-0.09336	0.03998	-0.06341	0.08012	-0.001597	0.008834
	EUR	DBP	HEAVYvsLIGHT	MALE	14	72821222	14:72821222:A_T	rs8015900	A	T	355220	102938	46	0.2134	0.06035	--++-++---+-?-+-+----++--+-++----++-+++--??+---+-	-0.1406	0.03421	3.919e-05	0.2163	0.3661	-+---+-+--++?++--+--++-++++++++-+-++-+--+??++--+-	-0.0005	0.07195	0.9947		0.2146	0.06867	--+++++---+-?-+-+-----+--+-++----+--+-+--??+----+	-+---+-+--++?++--+--++-++++++++-+-++-+--+??++--+-	-0.14	0.03702	0.0002834	0.07086	-0.001368	0.0001243
	EUR	DBP	HEAVYvsNEVER	COMBINED	14	72821222	14:72821222:A_T	rs8015900	A	T	220008	159567	23	0.2168	0.7169	--++??--+-+--+?+++-+--??--+-	-0.1496	0.04482	0.0008568	0.2158	0.8232	----??--++-++-?-+-+-+-??+-++	-0.0015	0.1141	0.9897		0.2166	0.8689	+-++??----+--+?+++-+-+??--+-	----??--++-++-?-+-+-+-??+-++	-0.09641	0.0828	-0.07474	0.09631	-0.006849	0.00183
	EUR	DBP	HEAVYvsNEVER	FEMALE	14	72821222	14:72821222:A_T	rs8015900	A	T	94663	64083	19	0.216	0.6499	+-?--+++---+++--?--+-	-0.1282	0.06616	0.05268	0.2157	0.6712	--?+--+++---+-+-?--++	0.019	0.1953	0.9224		0.2159	0.7404	+-?--+-+---+++-+?--+-	--?+--+++---+-+-?--++	-0.09016	0.1158	-0.06039	0.1385	-0.0134	0.1149
	EUR	DBP	HEAVYvsNEVER	MALE	14	72821222	14:72821222:A_T	rs8015900	A	T	124008	95236	19	0.2176	0.7749	---------+++---+-??--	-0.1805	0.05799	0.001873	0.2177	0.1514	----++--+--+-++-+??+-	0.0266	0.1464	0.8558		0.2172	0.3564	+++----+-++-+--+-??-+	----++--+--+-++-+??+-	-0.1377	0.1202	-0.05025	0.1358	-0.01443	0.007486
	EUR	DBP	LIGHTvsNEVER	COMBINED	14	72821222	14:72821222:A_T	rs8015900	A	T	424211	364923	26	0.2133	0.8025	+---++??-+----++--+--+--??-+--	-0.1009	0.03328	0.002439	0.2125	0.7413	++--+-??++---++-+---+-+-??++-+	0.0392	0.094	0.6766		0.2129	0.8667	+-++++??----+--+-+++-+-+??--+-	++--+-??++---++-+---+-+-??++-+	-0.1218	0.08042	0.02355	0.08676	-0.006462	0.006306
	EUR	DBP	LIGHTvsNEVER	FEMALE	14	72821222	14:72821222:A_T	rs8015900	A	T	182951	151972	24	0.2081	0.8675	--+-??--+-+-+--+++++--??-+--	-0.0821	0.04861	0.09152	0.2038	0.5669	-+--??++---++--+--+-+-??++-+	0.0289	0.1457	0.8427		0.2077	0.8255	--+-??--+-+----+++-+-+??--+-	-+--??++---++--+--+-+-??++-+	-0.1505	0.1105	0.08027	0.1213	-0.0122	0.1702
	EUR	DBP	LIGHTvsNEVER	MALE	14	72821222	14:72821222:A_T	rs8015900	A	T	240611	212806	23	0.2173	0.1203	+--++-+-----++----+--??--	-0.1222	0.0423	0.003902	0.2186	0.5968	-+-++++++-+-----++-+-??++	0.0472	0.1272	0.7105		0.2169	0.2624	+-+++----+-+++-+--+-+??--	-+-++++++-+-----++-+-??++	-0.1401	0.1183	0.02201	0.1255	-0.01398	0.01324
	EUR	PP	CURDRINK	COMBINED	14	72821222	14:72821222:A_T	rs8015900	A	T	839638	634800	60	0.212	0.868	+-+-++++-++++++-?-+++-++--+++++--+-----++++-++-----+??-++++++++	0.1768	0.02769	1.672e-10	0.2136	0.2771	+++--+++-+---+--?-+--+----++---++----+----------+--+??-+-----++	-0.3072	0.06401	1.581e-06	0.0404224	0.2135	0.5055	+-+++++--+++++++?++++-++-+--+++--++++-++++++++-+-++-??+-+++++-+	+++--+++-+---+--?-+--+----++---++----+----------+--+??-+-----++	0.3691	0.05137	-0.2474	0.05848	-0.002636	1.829e-13
	EUR	PP	CURDRINK	FEMALE	14	72821222	14:72821222:A_T	rs8015900	A	T	354716	274857	58	0.2105	0.1339	+++-++++-+++-++-?-+++-++-+++-+--+-----++++++---+-+??-++++++++	0.1821	0.03773	1.365e-06	0.2094	0.2776	+++---++-++--+-+?----+-+-++--++++----+-+--+-+-++--??-+-----++	-0.3229	0.09682	0.0008473		0.2105	0.0637	+-+++++---++-++-?++++-+++--+-----++++-++++++-+-+-+??+-+++++--	+++---++-++--+-+?----+-+-++--++++----+-+--+-+-++--??-+-----++	0.3341	0.07536	-0.1914	0.08509	-0.005674	5.704e-07
	EUR	PP	CURDRINK	MALE	14	72821222	14:72821222:A_T	rs8015900	A	T	483170	358425	51	0.2138	0.6285	--++++-++-?+-+-?---+++--+-+++----+-++++-++-+--++??-++-+	0.1744	0.03638	1.605e-06	0.217	0.1261	--+-+++---?++--?-++-+--++----+--++-+--+----++--+??+--+-	-0.2592	0.08614	0.002613		0.2157	0.2987	++-+-+-++-?+-++?+--+-++--++++-+---+-++-+++++-++-??-++-+	--+-+++---?++--?-++-+--++----+--++-+--+----++--+??+--+-	0.3731	0.06943	-0.2571	0.07915	-0.004814	4.377e-08
	EUR	PP	HEAVYvsLIGHT	COMBINED	14	72821222	14:72821222:A_T	rs8015900	A	T	630691	175848	52	0.2112	0.6283	+-++++-?++-++-?-+++-+-?+-+-?+-----++-+-++--+--+??-+++-++++	0.1184	0.0305	0.0001063	0.2157	0.9061	--+-+++?----++?-++-+--?++-+?++++++++++-+-+----+??++++-+-++	0.0351	0.06236	0.574		0.2129	0.8546	+--+++-?++-+--?-+++-++?+-+-?------++-+-++--+--+??-+++-++-+	--+-+++?----++?-++-+--?++-+?++++++++++-+-+----+??++++-+-++	0.1076	0.03184	0.05305	0.06226	-0.001012	0.0001292
	EUR	PP	HEAVYvsLIGHT	FEMALE	14	72821222	14:72821222:A_T	rs8015900	A	T	272742	72337	41	0.2101	0.03913	+--+-++-+??-+---++--+---+++--+---+-?-+++++++	0.1289	0.04223	0.002284	0.2161	0.3925	--+++--++??++-+----+++++-++++++----?+++-+-+-	0.0556	0.0919	0.5451		0.2106	0.06611	+----++--??-++--++------+-+--+---+-?-+++++-+	--+++--++??++-+----+++++-++++++----?+++-+-+-	0.1097	0.04498	0.09334	0.08981	-0.00202	0.003092
	EUR	PP	HEAVYvsLIGHT	MALE	14	72821222	14:72821222:A_T	rs8015900	A	T	355216	102936	46	0.2127	0.543	+++++---+-+-?-+++++---+------++-+-++-++--??+-++-+	0.1134	0.04021	0.004853	0.2157	0.7717	-++-++--+-++?-+--+--++-+-++++-+-----++-+-??+--+++	-0.0041	0.0851	0.9614		0.2146	0.6675	++++--++++--?-+++++---+-+----++-+-++-++--??++++--	-++-++--+-++?-+--+--++-+-++++-+-----++-+-??+--+++	0.1185	0.04374	-0.01049	0.08362	-0.00191	0.01154
	EUR	PP	HEAVYvsNEVER	COMBINED	14	72821222	14:72821222:A_T	rs8015900	A	T	220006	159565	23	0.2158	0.755	+-+-??++-++-++?++++-++??++++	0.2197	0.05243	2.788e-05	0.2143	0.05507	-+++??--+--+--?------+??+-++	-0.2448	0.1394	0.07904		0.2166	0.1872	+-+-??++-++-++?++++-+-??++-+	-+++??--+--+--?------+??+-++	0.354	0.09925	-0.1806	0.1152	-0.009843	4.266e-05
	EUR	PP	HEAVYvsNEVER	FEMALE	14	72821222	14:72821222:A_T	rs8015900	A	T	94663	64083	19	0.2154	0.2879	++?+--++---++++-?++++	0.19	0.07514	0.01151	0.2148	0.4561	-+?--+--+-+---+-?+-+-	-0.1	0.2282	0.6614		0.2159	0.3097	++?++-++-+-+++--?-+-+	-+?--+--+-+---+-?+-+-	0.14	0.1364	0.06799	0.1612	-0.01859	0.03875
	EUR	PP	HEAVYvsNEVER	MALE	14	72821222	14:72821222:A_T	rs8015900	A	T	124006	95234	19	0.2166	0.5762	----++--+++++-+-+??++	0.2172	0.06873	0.001582	0.2167	0.1505	++++-+--+----+---??-+	-0.3912	0.1812	0.03083		0.2172	0.2877	----+++++++++-+-+??+-	++++-+--+----+---??-+	0.5371	0.1454	-0.4005	0.1642	-0.02112	0.0002805
	EUR	PP	LIGHTvsNEVER	COMBINED	14	72821222	14:72821222:A_T	rs8015900	A	T	424207	364919	26	0.2123	0.7749	+-+++-??++-++-++--++++++??++-+	0.1786	0.03891	4.478e-06	0.2116	0.06562	++++++??--+--+--+----+-+??----	-0.1962	0.1166	0.09259		0.2129	0.2159	+-+-+-??++-++-++-++++-+-??++-+	++++++??--+--+--+----+-+??----	0.3233	0.09925	-0.1711	0.1065	-0.009843	9.336e-06
	EUR	PP	LIGHTvsNEVER	FEMALE	14	72821222	14:72821222:A_T	rs8015900	A	T	182949	151970	24	0.2078	0.08312	+-+-??++-++++---++--+-??++-+	0.1654	0.05416	0.002258	0.203	0.1138	++--??-----+------+++-??+---	-0.0563	0.1732	0.7451		0.2077	0.0348	+-++??++-++-+--+++--+-??-+-+	++--??-----+------+++-??+---	0.1355	0.1344	0.0376	0.1456	-0.01805	0.007925
	EUR	PP	LIGHTvsNEVER	MALE	14	72821222	14:72821222:A_T	rs8015900	A	T	240609	212804	23	0.2166	0.4955	-+++-++++--++-+++++-+??++	0.191	0.05089	0.0001728	0.2183	0.03986	+-++++--+----+--+-+-+??-+	-0.3173	0.1591	0.04616		0.2169	0.08228	-+----+++++++-++-+-+-??+-	+-++++--+----+--+-+-+??-+	0.4733	0.146	-0.3243	0.1547	-0.02129	0.0001407
	EUR	SBP	CURDRINK	COMBINED	14	72821222	14:72821222:A_T	rs8015900	A	T	839668	634819	60	0.2115	0.8031	+-+-++++-+++-++-?---+-++-++-+----+--++-+-+++++------??++-++++-+	0.0556	0.04	0.1649	0.2135	0.8408	++---+++-+-+----?---++----++-+-+----++-----+--+-+---??++------+	-0.3122	0.08917	0.0004648		0.2135	0.8892	+-+++-++--+-++++?-----+++++-+-+--++-+++++++-++-+-+++??--+++++++	++---+++-+-+----?---++----++-+-+----++-----+--+-+---??++------+	0.2634	0.07102	-0.2707	0.08136	-0.005038	0.003359
	EUR	SBP	CURDRINK	FEMALE	14	72821222	14:72821222:A_T	rs8015900	A	T	354731	274866	58	0.2094	0.297	+-+---++-+++-+-+?--+---+++-+----++--++++++++---+-+??-+-++++-+	0.06	0.0557	0.2815	0.2082	0.8034	+++---++-+++-+-+?--+-+-+-++---+++--+-+-+------++--??-+------+	-0.3175	0.1395	0.02291		0.2105	0.5188	+-++++++--+-++++?++---++++-+-+--++--+-+-++++-+--++??+--+++++-	+++---++-+++-+-+?--+-+-+-++---+++--+-+-+------++--??-+------+	0.2155	0.1087	-0.1954	0.1228	-0.01181	0.1654
	EUR	SBP	CURDRINK	MALE	14	72821222	14:72821222:A_T	rs8015900	A	T	483185	358435	51	0.2136	0.7481	--++++-+-+?+-+-?-+-+-+--+-++----++-----+++-++---??+-+-+	0.0526	0.05124	0.3041	0.217	0.233	+---++++++?+++-?++-++--++--+-+---+-+--++---+---+??+----	-0.2736	0.1168	0.01906		0.2157	0.4655	-+++---+--?+-++?---+-++---+-+-+-+-+-++--+++-+++-??-++-+	+---++++++?+++-?++-++--++--+-+---+-+--++---+---+??+----	0.2754	0.09309	-0.291	0.1075	-0.008652	0.01964
	EUR	SBP	HEAVYvsLIGHT	COMBINED	14	72821222	14:72821222:A_T	rs8015900	A	T	630710	175857	52	0.2105	0.9202	+--+++-?+-----?---+---?----?-+--+----++++--+--+??++-+--+-+	-0.0185	0.04474	0.679	0.2155	0.532	--+--++?----++?++--+--?+--+?+-+++-++++-+-+----+??++--+--++	-0.0083	0.0908	0.927		0.2129	0.8289	+--+++-?+-++--?---+-+-?-+--?-+--+-----+++--+---??++-+-++-+	--+--++?----++?++--+--?+--+?+-+++-++++-+-+----+??++--+--++	-0.02116	0.04521	0.02548	0.09057	-0.00204	0.9039
	EUR	SBP	HEAVYvsLIGHT	FEMALE	14	72821222	14:72821222:A_T	rs8015900	A	T	272744	72338	41	0.209	0.2685	+----++--??-+---++-----++-+--++--+-?--++-+-+	-0.0024	0.0625	0.9688	0.2158	0.1581	--+++---+??++-++----+-+--++++-++---?++----++	-0.0449	0.1357	0.741		0.2106	0.1128	+----++--??-+---+++----++----+---+-?--++++-+	--+++---+??++-++----+-+--++++-++---?++----++	-0.003865	0.06497	0.01935	0.1324	-0.004216	0.99
	EUR	SBP	HEAVYvsLIGHT	MALE	14	72821222	14:72821222:A_T	rs8015900	A	T	355226	102943	46	0.2123	0.3021	-++++++-+-+-?-+-+-+--++--+-+----++++-++--??+----+	-0.0321	0.05763	0.5779	0.2155	0.5574	-+--++-+--++?++--+--++++-++++++---+-++-++??++-+++	-0.0049	0.1226	0.9683		0.2146	0.352	+-+++++-+++-?-+-+-+---+---------++++-++--??+-+--+	-+--++-+--++?++--+--++++-++++++---+-++-++??++-+++	-0.02622	0.06154	-0.004018	0.1206	-0.00378	0.8823
	EUR	SBP	HEAVYvsNEVER	COMBINED	14	72821222	14:72821222:A_T	rs8015900	A	T	220008	159566	23	0.2153	0.774	+-++??--+-+---?++++-+-??++++	0.0403	0.07599	0.5954	0.2138	0.1997	--++??--+--+--?------+??+-++	-0.2873	0.1944	0.1393		0.2166	0.4329	+-++??+--++-+-?++++-+-??-++-	--++??--+--+--?------+??+-++	0.1652	0.1333	-0.1815	0.1582	-0.01776	0.4769
	EUR	SBP	HEAVYvsNEVER	FEMALE	14	72821222	14:72821222:A_T	rs8015900	A	T	94665	64084	19	0.2146	0.3198	++?+--++---++++-?++++	0.0259	0.1098	0.8132	0.2139	0.2308	-+?+-+--+---+-+-?+-++	-0.2046	0.3256	0.5298		0.2159	0.1807	++?+--++---+++--?-++-	-+?+-+--+---+-+-?+-++	-0.004303	0.1857	0.03254	0.2256	-0.03448	0.9766
	EUR	SBP	HEAVYvsNEVER	MALE	14	72821222	14:72821222:A_T	rs8015900	A	T	124006	95234	19	0.2163	0.7388	-----+---++++-+++??++	0.0165	0.09841	0.8669	0.2163	0.1548	-++-++--+-++-+---??-+	-0.3449	0.2504	0.1685		0.2172	0.3643	+------+-++++-+++??+-	-++-++--+-++-+---??-+	0.2925	0.1937	-0.3505	0.2227	-0.03748	0.2887
	EUR	SBP	LIGHTvsNEVER	COMBINED	14	72821222	14:72821222:A_T	rs8015900	A	T	424209	364920	26	0.2117	0.6438	+-++++??++-++-+---+++++-??++-+	0.0642	0.05654	0.2557	0.2109	0.2583	++-+++??-+---++++----+-+??+--+	-0.1028	0.1585	0.5165		0.2129	0.3558	+-+-++??+--++-+--++++-+-??-+--	++-+++??-+---++++----+-+??+--+	0.09232	0.1334	-0.04009	0.1444	-0.01778	0.5392
	EUR	SBP	LIGHTvsNEVER	FEMALE	14	72821222	14:72821222:A_T	rs8015900	A	T	182951	151971	24	0.2063	0.2504	+-+-??+---+-+--+++--+-??++-+	0.0592	0.08016	0.4606	0.2017	0.2606	++--??-----++-----+++-??+--+	-0.0011	0.2406	0.9965		0.2077	0.1923	+-++??+--++----+++--+-??-+--	++--??-----++-----+++-??+--+	-0.08334	0.1823	0.1693	0.2001	-0.03322	0.5485
	EUR	SBP	LIGHTvsNEVER	MALE	14	72821222	14:72821222:A_T	rs8015900	A	T	240609	212804	23	0.2162	0.4502	--++--+-+--+++-++++-+??-+	0.0653	0.07217	0.365	0.2179	0.1389	+-+++++++---++--+-+-+??-+	-0.1951	0.2153	0.365		0.2169	0.1601	-+------++-+-+++-+++-??+-	+-+++++++---++--+-+-+??-+	0.2094	0.1957	-0.1679	0.2083	-0.03826	0.4981
	ALL	DBP	CURDRINK	COMBINED	15	60191621	15:60191621:A_G	rs336527	A	G	289943	146947	3	0.947	0.07224	-??++?	0.0875	0.1367	0.5222	0.9475	0.05154	+??-+?	0.3673	0.278	0.1864		0.9809	0.03206	-??++?	+??-+?	-0.05086	0.1835	0.321	0.2722	-0.03359	0.3912
	ALL	DBP	CURDRINK	FEMALE	15	60191621	15:60191621:A_G	rs336527	A	G	45507	19073	3	0.945	0.3416	-??++?	-0.0811	0.218	0.7097	0.9453	0.4939	+??+-?	0.3292	0.4722	0.4858		0.9656	0.4514	-??++?	+??+-?	-0.1952	0.2761	0.3185	0.4438	-0.07615	0.7313
	ALL	DBP	CURDRINK	MALE	15	60191621	15:60191621:A_G	rs336527	A	G	239373	125513	3	0.9479	0.375	+??++?	0.1795	0.1799	0.3184	0.9487	0.02864	+??-+?	0.3783	0.3638	0.2984		0.9841	0.07925	-??++?	+??-+?	0.01608	0.2517	0.3299	0.3568	-0.06324	0.393
	ALL	DBP	HEAVYvsLIGHT	COMBINED	15	60191621	15:60191621:A_G	rs336527	A	G	118385	21245	2	0.9451	0.6905	+?-??	0.1631	0.2735	0.551	0.9471	0.7066	+?+??	2.0336	0.7993	0.01095		0.9844	0.8205	-?-??	+?+??	-0.1192	0.2993	1.901	0.7813	-0.08916	0.04399
	ALL	DBP	HEAVYvsLIGHT	MALE	15	60191621	15:60191621:A_G	rs336527	A	G	106134	19303	2	0.9465	0.4847	+?-??	0.2111	0.3163	0.5045	0.9492	0.751	+?+??	3.4233	0.9349	0.0002505		0.9859	0.6579	-?-??	+?+??	-0.274	0.3472	3.298	0.9143	-0.12	0.001231
	ALL	DBP	HEAVYvsNEVER	COMBINED	15	60191621	15:60191621:A_G	rs336527	A	G	39687	21376	2	0.951	0.7099	-?+??	-0.0606	0.4228	0.8861	0.9504	0.9577	+?+??	2.2637	0.9253	0.01443		0.9824	0.9768	-?-??	+?+??	-0.893	0.5197	2.613	0.8938	-0.2696	0.01394
	ALL	DBP	HEAVYvsNEVER	MALE	15	60191621	15:60191621:A_G	rs336527	A	G	33395	19416	2	0.9524	0.8765	+?+??	0.9735	0.5507	0.07709	0.9524	0.8233	+?+??	3.2784	1.1354	0.003885		0.9857	0.9699	-?+??	+?+??	-0.451	0.725	3.385	1.111	-0.5251	0.001914
	ALL	DBP	LIGHTvsNEVER	COMBINED	15	60191621	15:60191621:A_G	rs336527	A	G	133587	104962	3	0.9461	0.6135	-?-+?	-0.113	0.1916	0.5552	0.9467	0.8177	+?-+?	0.2463	0.4469	0.5815		0.9798	0.8582	-?--?	+?-+?	-0.2675	0.3025	0.2641	0.3891	-0.09142	0.6763
	ALL	DBP	LIGHTvsNEVER	MALE	15	60191621	15:60191621:A_G	rs336527	A	G	104047	88511	2	0.9461	0.3385	-?-??	-0.1609	0.2867	0.5747	0.9462	0.6848	-?-??	-0.2516	0.7299	0.7303		0.984	0.5904	-?+??	-?-??	-0.0804	0.6012	-0.1111	0.6822	-0.3613	0.8314
	ALL	PP	CURDRINK	COMBINED	15	60191621	15:60191621:A_G	rs336527	A	G	289942	146947	3	0.948	0.5386	-??+-?	-0.2955	0.1636	0.07084	0.9487	0.0789	+??-+?	0.3526	0.3316	0.2876		0.9809	0.1619	-??+-?	+??-+?	-0.4384	0.2204	0.3141	0.3232	-0.04846	0.1207
	ALL	PP	CURDRINK	FEMALE	15	60191621	15:60191621:A_G	rs336527	A	G	45507	19073	3	0.9472	0.3755	-??--?	-0.673	0.2628	0.01045	0.9472	0.07503	+??-+?	0.5709	0.5633	0.3108		0.9656	0.1212	-??--?	+??-+?	-0.8827	0.3381	0.4821	0.5262	-0.1142	0.0203
	ALL	PP	CURDRINK	MALE	15	60191621	15:60191621:A_G	rs336527	A	G	239372	125513	3	0.9485	0.4678	-??+-?	-0.1279	0.2116	0.5455	0.9493	0.2782	+??-+?	0.4043	0.4296	0.3467		0.9841	0.4191	-??+-?	+??-+?	-0.2545	0.2985	0.2597	0.4195	-0.08894	0.6951
	ALL	PP	HEAVYvsLIGHT	COMBINED	15	60191621	15:60191621:A_G	rs336527	A	G	118385	21245	2	0.9443	0.4603	+?-??	0.1178	0.2996	0.6943	0.9458	0.04957	+?+??	4.0411	0.8364	1.353e-06		0.9844	0.1086	-?-??	+?+??	-0.4702	0.3237	3.777	0.8281	-0.1042	2.855e-05
	ALL	PP	HEAVYvsLIGHT	MALE	15	60191621	15:60191621:A_G	rs336527	A	G	106134	19303	2	0.9457	0.8321	+?-??	0.1108	0.3548	0.7549	0.9479	0.2033	+?+??	5.4586	1.0087	6.256e-08		0.9859	0.4325	-?-??	+?+??	-0.6963	0.3852	5.35	0.9984	-0.1478	5.593e-07
	ALL	PP	HEAVYvsNEVER	COMBINED	15	60191621	15:60191621:A_G	rs336527	A	G	39686	21376	2	0.9508	0.07917	+?+??	0.7332	0.457	0.1086	0.9501	0.8253	+?+??	4.1239	0.9998	3.712e-05		0.9824	0.3337	-?+??	+?+??	-0.59	0.5424	4.022	0.9621	-0.2936	4.971e-05
	ALL	PP	HEAVYvsNEVER	MALE	15	60191621	15:60191621:A_G	rs336527	A	G	33394	19416	2	0.9521	0.08742	+?+??	1.3832	0.6111	0.02361	0.9519	0.75	+?+??	5.5161	1.2621	1.239e-05		0.9857	0.3745	-?+??	+?+??	-0.9791	0.787	5.762	1.235	-0.6188	1.544e-06
	ALL	PP	LIGHTvsNEVER	COMBINED	15	60191621	15:60191621:A_G	rs336527	A	G	133586	104962	3	0.9474	0.3298	-?-+?	-0.4975	0.226	0.02769	0.9485	0.3893	+?-+?	0.4626	0.5281	0.3811		0.9798	0.4083	-?+-?	+?-+?	-0.7267	0.3597	0.3419	0.4597	-0.1292	0.05312
	ALL	PP	LIGHTvsNEVER	MALE	15	60191621	15:60191621:A_G	rs336527	A	G	104046	88511	2	0.9455	0.9053	-?-??	-0.728	0.3234	0.02439	0.946	0.2038	+?-??	0.3312	0.8165	0.685		0.9841	0.4451	-?+??	+?-??	-1.019	0.658	0.3748	0.7572	-0.4327	0.0694
	ALL	SBP	CURDRINK	COMBINED	15	60191621	15:60191621:A_G	rs336527	A	G	289952	146952	3	0.9478	0.304	-??++?	-0.2143	0.2322	0.356	0.9485	0.01539	+??-+?	0.7183	0.4705	0.1268		0.9809	0.03606	-??+-?	+??-+?	-0.5111	0.3107	0.6694	0.4607	-0.09629	0.2316
	ALL	SBP	CURDRINK	FEMALE	15	60191621	15:60191621:A_G	rs336527	A	G	45511	19073	3	0.9467	0.7735	-??--?	-0.8561	0.3801	0.0243	0.9467	0.6108	+??-+?	0.8407	0.8149	0.3022		0.9656	0.8019	-??+-?	+??-+?	-1.179	0.4849	0.77	0.7681	-0.2347	0.04126
	ALL	SBP	CURDRINK	MALE	15	60191621	15:60191621:A_G	rs336527	A	G	239378	125518	3	0.9483	0.4161	-??++?	0.0919	0.2992	0.7587	0.949	0.02248	+??-+?	0.8176	0.6053	0.1768		0.9841	0.07572	-??+-?	+??-+?	-0.2254	0.4177	0.6561	0.5944	-0.1741	0.5151
	ALL	SBP	HEAVYvsLIGHT	COMBINED	15	60191621	15:60191621:A_G	rs336527	A	G	118388	21245	2	0.9448	0.4203	+?-??	0.3093	0.4479	0.4898	0.9466	0.0945	+?+??	6.316	1.2849	8.859e-07		0.9844	0.1625	-?-??	+?+??	-0.5726	0.4846	5.951	1.268	-0.2337	1.339e-05
	ALL	SBP	HEAVYvsLIGHT	MALE	15	60191621	15:60191621:A_G	rs336527	A	G	106137	19303	2	0.9462	0.5525	+?-??	0.3786	0.5207	0.4671	0.9487	0.2473	+?+??	8.9174	1.5159	4.037e-09	0.0480502	0.9859	0.3785	-?-??	+?+??	-0.8734	0.5672	8.7	1.494	-0.3204	3.316e-08
	ALL	SBP	HEAVYvsNEVER	COMBINED	15	60191621	15:60191621:A_G	rs336527	A	G	39687	21376	2	0.9507	0.1279	+?+??	0.8191	0.7	0.242	0.9501	0.9124	+?+??	6.5482	1.5172	1.59e-05		0.9824	0.4905	-?+??	+?+??	-1.511	0.8536	6.888	1.466	-0.7272	8.002e-06
	ALL	SBP	HEAVYvsNEVER	MALE	15	60191621	15:60191621:A_G	rs336527	A	G	33394	19416	2	0.9522	0.1738	+?+??	2.5435	0.9112	0.005249	0.9521	0.7135	+?+??	8.6703	1.8809	4.033e-06		0.9857	0.5433	-?+??	+?+??	-1.311	1.202	9.107	1.841	-1.443	9.291e-08
	ALL	SBP	LIGHTvsNEVER	COMBINED	15	60191621	15:60191621:A_G	rs336527	A	G	133592	104967	3	0.9472	0.2405	-?-+?	-0.7001	0.3236	0.03052	0.9479	0.3923	+?-+?	0.8502	0.7567	0.2612		0.9798	0.3274	-?+-?	+?-+?	-1.269	0.5126	0.9006	0.6572	-0.2626	0.03145
	ALL	SBP	LIGHTvsNEVER	MALE	15	60191621	15:60191621:A_G	rs336527	A	G	104049	88514	2	0.9459	0.5386	-?-??	-0.936	0.4656	0.04439	0.946	0.2101	+?-??	0.1732	1.1812	0.8834		0.984	0.3488	-?+??	+?-??	-1.368	0.948	0.5627	1.088	-0.8985	0.1131
	EUR	DBP	CURDRINK	COMBINED	15	62516340	15:62516340:C_T	rs956006	T	C	835679	632060	60	0.333	0.8693	++++++-++++++-?++-++-++++--+-----++-++--++-+++--++--??++-+--++-	0.0714	0.02062	0.0005423	0.3348	0.6099	++----+--+--++?-++--++--+--+-+++++++--++---+-++-++-+??++++-+-++	0.0624	0.0461	0.1762		0.3324	0.8515	--++++-+++++--?+--++--++--+-+----+--++--++++++-++-+-??++----++-	++----+--+--++?-++--++--+--+-+++++++--++---+-++-++-+??++++-+-++	0.04073	0.03706	0.04122	0.04246	-0.001373	0.0008152
	EUR	DBP	CURDRINK	FEMALE	15	62516340	15:62516340:C_T	rs956006	T	C	352627	273662	58	0.3331	0.7503	-+++++----++++?++-++--++--++-++-+--++--++-+++-----??-+-++-++-	0.0461	0.02923	0.1148	0.3362	0.5738	+-----+-----++?-++--++-+--+--++++++-+++----++--+--??--+-++-++	-0.0508	0.0737	0.4909		0.3333	0.7602	-+++++-++-+++-?+--++--++-+-+-------++--++++-----+-??++-++-++-	+-----+-----++?-++--++-+--+--++++++-+++----++--+--??--+-++-++	0.05962	0.0575	-0.01689	0.06502	-0.003306	0.2495
	EUR	DBP	CURDRINK	MALE	15	62516340	15:62516340:C_T	rs956006	T	C	482075	357598	52	0.3326	0.9839	+-++++-++----?---+++++++-+-----++++--+-+++-+++++??+++--	0.0921	0.02628	0.0004599	0.3338	0.3653	++--+++-++++-?-++++-++-+++-++---+++++--++-+--+++??+++-+	0.1253	0.0601	0.03701		0.3317	0.8622	+-++++-++----?+--+++--+--++---++-+---+++++-++---??+----	++--+++-++++-?-++++-++-+++-++---+++++--++-+--+++??+++-+	0.03168	0.04815	0.08226	0.05555	-0.002318	0.0004283
	EUR	DBP	HEAVYvsLIGHT	COMBINED	15	62516340	15:62516340:C_T	rs956006	T	C	628903	175285	55	0.3331	0.8521	+-++++-++++-?-+-++-+++-+-----+++++-++-++++-++--??++++---+-	0.0785	0.02322	0.0007291	0.3306	0.1534	+---+-+++++-?-+--+--++++----++-+---+-+-+-+-+---??----++-+-	-0.0736	0.04699	0.1174		0.3325	0.4828	--++-+-+--++?-+-+--++--+--+---+-++-++-+-+--++--??++++----+	+---+-+++++-?-+--+--++++----++-+---+-+-+-+-+---??----++-+-	0.09392	0.02388	-0.04707	0.04708	-0.0005702	0.000655
	EUR	DBP	HEAVYvsLIGHT	FEMALE	15	62516340	15:62516340:C_T	rs956006	T	C	271616	72070	42	0.3327	0.7813	--+--+++?-+----++++-+++---++--++---?-+++--+-	0.0356	0.03336	0.2851	0.3294	0.4201	-+---+-+?---+-+++-+---+--+++-+-+-+-?----+-+-	-0.0434	0.0716	0.5444		0.333	0.6829	--+++-++?-+----+-++-++-+--++--+----?-+++----	-+---+-+?---+-+++-+---+--+++-+-+-+-?----+-+-	0.03873	0.03459	-0.002718	0.07025	-0.001196	0.4791
	EUR	DBP	HEAVYvsLIGHT	MALE	15	62516340	15:62516340:C_T	rs956006	T	C	353561	102530	46	0.3331	0.8086	+-++-++-+-?-+-+++++-+----++++--+-+++-++++??++++--	0.114	0.02994	0.0001382	0.3314	0.2852	+--+++++--?-+--+--+++---+++-----+-+-+++--??----+-	-0.1052	0.06293	0.09467		0.3319	0.5961	-+++----++?---++++--+----+++++++-+-+-++++??++++-+	+--+++++--?-+--+--+++---+++-----+-+-+++--??----+-	0.1403	0.03245	-0.08799	0.062	-0.001053	0.0001222
	EUR	DBP	HEAVYvsNEVER	COMBINED	15	62516340	15:62516340:C_T	rs956006	T	C	221179	159974	26	0.3314	0.2218	+--++-+--+++--+-+-++-+??+++-	0.0289	0.03878	0.4556	0.3339	0.32	-++--++-+-++---+-+-++-??+-++	0.0812	0.0991	0.4126		0.3302	0.1789	+--++-+--+--+-+-+-++-+??-++-	-++--++-+-++---+-+-++-??+-++	-0.02907	0.0704	0.0776	0.08248	-0.004954	0.5011
	EUR	DBP	HEAVYvsNEVER	FEMALE	15	62516340	15:62516340:C_T	rs956006	T	C	94791	64135	20	0.3328	0.2201	+--+-+++-+--+---?+++-	0.0137	0.05734	0.8114	0.3348	0.9041	--+----+---+-+++?--++	-0.142	0.1693	0.4016		0.3314	0.5157	++-+-++--+--+---?+++-	--+----+---+-+++?--++	0.001326	0.09881	0.01279	0.1192	-0.009764	0.9784
	EUR	DBP	HEAVYvsNEVER	MALE	15	62516340	15:62516340:C_T	rs956006	T	C	124009	95236	19	0.3302	0.2172	+-++--+++--+++++-??+-	0.0421	0.0508	0.4068	0.3314	0.1152	++++-++++----+--+??+-	0.1732	0.1291	0.1798		0.3293	0.07085	----+-+-++-++-++-??-+	++++-++++----+--+??+-	-0.07586	0.1066	0.1484	0.1201	-0.01137	0.3375
	EUR	DBP	LIGHTvsNEVER	COMBINED	15	62516340	15:62516340:C_T	rs956006	T	C	426272	366824	28	0.3362	0.5371	-+++-++++-++-++--++-++++??+++-	0.0884	0.02866	0.002069	0.3382	0.2906	++-++--+-++-++-+-+-++-+-??++-+	0.1482	0.0812	0.06815		0.3343	0.4627	-++--++-+--+--+-+-+-++-+??-++-	++-++--+-++-++-+-+-++-+-??++-+	-0.02865	0.0697	0.1396	0.07518	-0.004858	0.0009215
	EUR	DBP	LIGHTvsNEVER	FEMALE	15	62516340	15:62516340:C_T	rs956006	T	C	183456	152296	26	0.3401	0.6869	-+++++--++-++---+-+-+-??+++-	0.0447	0.04135	0.2792	0.3454	0.6152	+--+-+-+--++--++-++-+-??-+-+	0.0127	0.1224	0.9175		0.3376	0.7419	-++++-+-++--+---+-----??+++-	+--+-+-+--++--++-++-+-??-+-+	-0.01833	0.09405	0.07743	0.1033	-0.008843	0.4004
	EUR	DBP	LIGHTvsNEVER	MALE	15	62516340	15:62516340:C_T	rs956006	T	C	240615	212809	23	0.3327	0.8372	-+-+-+++--++-+++-++++??+-	0.1317	0.03705	0.0003751	0.3319	0.01914	-+++++-+-+--+----+-+-??+-	0.2192	0.1126	0.05165		0.3315	0.123	+-----+-+-++-+++-++-+??-+	-+++++-+-+--+----+-+-??+-	-0.02621	0.1043	0.1822	0.1106	-0.01087	0.0002273
	EUR	PP	CURDRINK	COMBINED	15	62516340	15:62516340:C_T	rs956006	T	C	835672	632054	60	0.3334	0.1874	---+---+-+-+--?+-+-+--++++----+-+++--+-+-+--+-----++??+------+-	-0.1694	0.02416	2.5e-12	0.3352	0.3279	--+--++-++++-+?-----++-+++-+-+-++++-+++++----++-++--??-+-+-+---	0.1674	0.05628	0.00291		0.3324	0.1789	-+-+---+---++-?+-+++--+-------+-+-+----+-+-++--+--++??+---+--+-	--+--++-++++-+?-----++-+++-+-+-++++-+++++----++-++--??-+-+-+---	-0.2659	0.04529	0.1221	0.05147	-0.002051	3.193e-13
	EUR	PP	CURDRINK	FEMALE	15	62516340	15:62516340:C_T	rs956006	T	C	352624	273660	58	0.3333	0.6745	-+-+---+-+-++-?+---+--+-+----+-+++------+-+-----++??+------+-	-0.1799	0.03281	4.271e-08	0.3359	0.09788	-++-+++--++--+?-----++-+--+---++++-++-------+-++--??-+-+-+---	0.0885	0.08437	0.294		0.3333	0.3515	---+---+---++-?+-+++--+-+--+-+--------+-+-+--+--++??+------+-	-++-+++--++--+?-----++-+--+---++++-++-------+-++--??-+-+-+---	-0.2741	0.06605	0.1197	0.07449	-0.004361	7.371e-08
	EUR	PP	CURDRINK	MALE	15	62516340	15:62516340:C_T	rs956006	T	C	482071	357594	52	0.3332	0.1258	-------+--+--?+-+-+---++-+--++++++-+-+--+-----++??-----	-0.1575	0.03176	7.428e-07	0.3344	0.4409	-----++++-+-+?++--++++++++++-+--+++++---+++--+-+??--+--	0.192	0.07621	0.01173		0.3317	0.1407	+++-+----+---?+-++----+-----++++++---+++---++-++??-+-+-	-----++++-+-+?++--++++++++++-+--+++++---+++--+-+??--+--	-0.2593	0.06148	0.1278	0.06993	-0.003779	3.524e-07
	EUR	PP	HEAVYvsLIGHT	COMBINED	15	62516340	15:62516340:C_T	rs956006	T	C	628897	175283	55	0.3337	0.03915	-----+-+-+-+?+------++-+---++++-+-+-+--+----+++??++-------	-0.1371	0.02658	2.493e-07	0.331	0.9375	--+-+--+-+-+?+++-++++--++--+-+------+++-+++-++-??++--+--++	-0.0021	0.05465	0.9697		0.3325	0.4096	-----+++++--?+-------+----+++-+-+-+-+--+---++-+??+--------	--+-+--+-+-+?+++-++++--++--+-+------+++-+++-++-??++--+--++	-0.1346	0.02765	-0.02268	0.05443	-0.0007642	2.374e-07
	EUR	PP	HEAVYvsLIGHT	FEMALE	15	62516340	15:62516340:C_T	rs956006	T	C	271614	72070	42	0.3332	0.6017	-+---+--?-+----++----+-----------+-?+-------	-0.1544	0.03677	2.64e-05	0.3295	0.7018	-++---+-?+++-+++++---+-----+----+-+?-+++--+-	0.0151	0.0808	0.8518		0.333	0.7662	-----+--?-+-----+---++-+-----+---+-?+-------	-++---+-?+++-+++++---+-----+----+-+?-+++--+-	-0.1489	0.03893	-0.006401	0.07874	-0.001515	0.0001345
	EUR	PP	HEAVYvsLIGHT	MALE	15	62516340	15:62516340:C_T	rs956006	T	C	353557	102528	46	0.3336	0.1562	-----+-+-+?+-+-+---++----+++-+-+--+----+-??-+----	-0.1216	0.03523	0.000549	0.3319	0.5562	----++-+++?--+-++---++---+-+----++++++-++??++---+	-0.0175	0.0744	0.8141		0.3319	0.2788	-+---+-+--?+-+---++++---+-+--+-+------++-??--+---	----++-+++?--+-++---++---+-+----++++++-++??++---+	-0.1158	0.03829	-0.05384	0.07316	-0.001466	0.0004866
	EUR	PP	HEAVYvsNEVER	COMBINED	15	62516340	15:62516340:C_T	rs956006	T	C	221177	159972	26	0.332	0.08708	---++-+--++----+-----+??--+-	-0.2581	0.04537	1.286e-08	0.335	0.2448	+++-++-+++-+--+++-+-+-??+---	0.5856	0.1207	1.214e-06	0.0158658	0.3302	0.06458	---+--+---+-+--+-+---+??--+-	+++-++-+++-+--+++-+-+-??+---	-0.5551	0.08495	0.4118	0.09906	-0.007215	5.573e-11
	EUR	PP	HEAVYvsNEVER	FEMALE	15	62516340	15:62516340:C_T	rs956006	T	C	94791	64135	20	0.333	0.1291	---+--++--------?--+-	-0.2356	0.06512	0.0002977	0.3349	0.1125	+++-+++-+--++---?+---	0.3794	0.1973	0.05455		0.3314	0.18	---+---+-+----+-?--+-	+++-+++-+--++---?+---	-0.5223	0.116	0.4095	0.1383	-0.01345	2.644e-05
	EUR	PP	HEAVYvsNEVER	MALE	15	62516340	15:62516340:C_T	rs956006	T	C	124007	95234	19	0.331	0.04426	---++---+--+++---??--	-0.2741	0.05996	4.898e-06	0.3324	0.7098	+-+-++++++----+-+??++	0.5801	0.1593	0.0002704		0.3293	0.1395	---+-------+++-+-??-+	+-+-++++++----+-+??++	-0.6282	0.1286	0.457	0.1448	-0.01652	3.715e-07
	EUR	PP	LIGHTvsNEVER	COMBINED	15	62516340	15:62516340:C_T	rs956006	T	C	426268	366820	28	0.3369	0.0247	-----++-+---+----++--+++??--+-	-0.1891	0.03335	1.481e-08	0.3395	0.5335	--++-+++-+++++-++++-++++??+---	0.4574	0.1004	5.286e-06		0.3343	0.1319	-----+--+---+-+--+-+---+??--+-	--++-+++-+++++-++++-++++??+---	-0.5517	0.08575	0.4169	0.09202	-0.007352	7.117e-12
	EUR	PP	LIGHTvsNEVER	FEMALE	15	62516340	15:62516340:C_T	rs956006	T	C	183454	152294	26	0.3401	0.1358	----+-+---+-+-------++??--+-	-0.2183	0.046	2.125e-06	0.3461	0.6029	--++-+-+++-+--+++--++-??+--+	0.2797	0.1454	0.05437		0.3376	0.5162	----+-+---+-+-----+-++??--+-	--++-+-+++-+--+++--++-??+--+	-0.5082	0.114	0.344	0.1236	-0.01299	5.342e-07
	EUR	PP	LIGHTvsNEVER	MALE	15	62516340	15:62516340:C_T	rs956006	T	C	240613	212807	23	0.3334	0.03963	---------++--+++--+-+??--	-0.1645	0.0444	0.0002076	0.3329	0.7179	+-++--+++++++-++-+-++??+-	0.5585	0.1405	7.057e-05		0.3315	0.1014	-+---+-------++++-+-+??--	+-++--+++++++-++-+-++??+-	-0.5952	0.1287	0.4788	0.1363	-0.01657	1.904e-06
	EUR	SBP	CURDRINK	COMBINED	15	62516340	15:62516340:C_T	rs956006	T	C	835702	632073	60	0.3337	0.3404	-+-++--+-+-+--?+--++--+++--+-----++-++---+-++-----++??++-----+-	-0.1014	0.03495	0.003731	0.3356	0.4149	+-+--++--+---+?-+---++-+++-+-+-++++++++++----++-++-+??-+++-+--+	0.2282	0.07823	0.003512		0.3324	0.3546	-+-++--+--+++-?+--++--++----+-+------+---++++--+--++??+---+--+-	+-+--++--+---+?-+---++-+++-+-+-++++++++++----++-++-+??-+++-+--+	-0.2305	0.06248	0.1676	0.07147	-0.003902	0.0009612
	EUR	SBP	CURDRINK	FEMALE	15	62516340	15:62516340:C_T	rs956006	T	C	352639	273669	58	0.3338	0.554	-+-++--+--+++-?+--++--+++----+-++---+--++-+-+-----??++-----+-	-0.1393	0.04831	0.003958	0.337	0.2318	+++---+---+--+?-++--++-+--+---+++++-++-----++--+--??-+++-+--+	0.0368	0.121	0.7609		0.3333	0.4179	-+-++--+--+++-?+--++--+-++-+-+---------++-+--+--++??++-----+-	+++---+---+--+?-++--++-+--+---+++++-++-----++--+--??-+++-+--+	-0.2292	0.09484	0.1153	0.1071	-0.008992	0.007933
	EUR	SBP	CURDRINK	MALE	15	62516340	15:62516340:C_T	rs956006	T	C	482086	357604	52	0.3333	0.6806	--+----++-+--?+-+++---++-+-----+++-+-+-++---+-++??+----	-0.0677	0.04476	0.1304	0.3345	0.3098	-----++++-+++?-+--+-++++++-+----+++++---+++--+++??+++-+	0.3188	0.1031	0.001989		0.3317	0.4037	+-+-+---++---?+-++-+--+-----++++-+---+++---++-+-??---+-	-----++++-+++?-+--+-++++++-+----+++++---+++--+++??+++-+	-0.2297	0.08232	0.2146	0.09479	-0.006775	0.02981
	EUR	SBP	HEAVYvsLIGHT	COMBINED	15	62516340	15:62516340:C_T	rs956006	T	C	628916	175292	55	0.3339	0.2297	-----+-+-+-+?----+-+++-+---++++-+---+-++++-++-+??++-------	-0.0618	0.03884	0.1118	0.3313	0.9132	----+--+-+-+?-++-+++++++-+-+-+-+-----+-+-++-++-??-+--+--+-	-0.0683	0.0794	0.3902		0.3325	0.7486	-----+-+-+--?---+--+++-+--+++-+-+++-+-+-+--++-+??++-------	----+--+-+-+?-++-+++++++-+-+-+-+-----+-+-++-++-??-+--+--+-	-0.04739	0.03925	-0.06021	0.07915	-0.00154	0.1796
	EUR	SBP	HEAVYvsLIGHT	FEMALE	15	62516340	15:62516340:C_T	rs956006	T	C	271616	72071	42	0.3337	0.7902	--+--++-?-+----++----+---------+---?+-------	-0.1215	0.05421	0.025	0.3298	0.8944	-+------?++-++++++-+-++---++-+-+--+?-+-+--+-	-0.0244	0.1192	0.8378		0.333	0.9619	--+-+++-?-+----++---++-+-----------?+-------	-+------?++-++++++-+-++---++-+-+--+?-+-+--+-	-0.1133	0.05608	-0.009242	0.116	-0.003143	0.0828
	EUR	SBP	HEAVYvsLIGHT	MALE	15	62516340	15:62516340:C_T	rs956006	T	C	353567	102535	46	0.3338	0.4975	-----+-+-+?---++-+-++----+++++-+-+++--+++??+++---	-0.0123	0.05034	0.807	0.3323	0.6747	+---++++++?-++-++-+++++--+-+----+-+-++--+??++--+-	-0.1184	0.1071	0.2689		0.3319	0.7025	-+-----+-+?+--++-+-++---+-++++-+-+-+--+++??+++---	+---++++++?-++-++-+++++--+-+----+-+-++--+??++--+-	0.01543	0.05386	-0.1318	0.1054	-0.0029	0.4475
	EUR	SBP	HEAVYvsNEVER	COMBINED	15	62516340	15:62516340:C_T	rs956006	T	C	221179	159973	26	0.3328	0.02049	---++-+--++----++----+??--+-	-0.2351	0.06551	0.0003306	0.3356	0.4736	+++-++-+++++-++++++-+-??+-+-	0.6751	0.1678	5.695e-05		0.3302	0.06499	---++-+--+--+--------+??--+-	+++-++-+++++-++++++-+-??+-+-	-0.5753	0.1136	0.488	0.1356	-0.0129	4.071e-06
	EUR	SBP	HEAVYvsNEVER	FEMALE	15	62516340	15:62516340:C_T	rs956006	T	C	94793	64136	20	0.3338	0.03079	---+--++-+------?--+-	-0.2464	0.09492	0.009406	0.3358	0.782	+-+-++-++-+++--+?--+-	0.2719	0.281	0.3334		0.3314	0.311	---+--++-+------?--+-	+-+-++-++-+++--+?--+-	-0.5398	0.1577	0.4376	0.1935	-0.02488	0.002766
	EUR	SBP	HEAVYvsNEVER	MALE	15	62516340	15:62516340:C_T	rs956006	T	C	124007	95234	19	0.3316	0.03337	--+++-+++--+++-+-??--	-0.2337	0.0858	0.006428	0.3329	0.7668	+++++++++++---+-+??+-	0.7565	0.22	0.0005854		0.3293	0.1395	---++------+++-+-??-+	+++++++++++---+-+??+-	-0.656	0.171	0.5654	0.196	-0.02923	0.0005454
	EUR	SBP	LIGHTvsNEVER	COMBINED	15	62516340	15:62516340:C_T	rs956006	T	C	426270	366821	28	0.3379	0.233	-----++-+--++----++--+++??--+-	-0.1112	0.04828	0.02132	0.34	0.3821	+-++---+-++-++-++++-+++-??+--+	0.5875	0.1362	1.598e-05		0.3343	0.4289	-+---++-+--+--+--++--+-+??--+-	+-++---+-++-++-++++-+++-??+--+	-0.5598	0.1151	0.5293	0.1245	-0.01325	2.915e-05
	EUR	SBP	LIGHTvsNEVER	FEMALE	15	62516340	15:62516340:C_T	rs956006	T	C	183456	152295	26	0.3418	0.5122	----+++--++-+-------++??--+-	-0.1876	0.06786	0.00568	0.3473	0.4971	--++-+-++--+--++-+-++-??+--+	0.2724	0.201	0.1754		0.3376	0.7542	-+--+-+--++-+-----+--+??--+-	--++-+-++--+--++-+-++-??+--+	-0.509	0.1544	0.393	0.1696	-0.02385	0.002145
	EUR	SBP	LIGHTvsNEVER	MALE	15	62516340	15:62516340:C_T	rs956006	T	C	240613	212807	23	0.3342	0.2499	-+---+-+-++--+++--+++??--	-0.0421	0.06288	0.5034	0.333	0.1336	--+++--++++-+--+-+-++??+-	0.787	0.1901	3.465e-05		0.3315	0.07539	-+---++------++++-+-+??-+	--+++--++++-+--+-+-++??+-	-0.6118	0.1724	0.6487	0.1834	-0.0297	0.002484
