# Supplementary material for: Discovery of gene-alcohol interaction loci influencing blood pressure in 1.1 million individuals from multiple populations
Source: Research Square preprint supplement (doi:10.21203/rs.3.rs-9283196/v1), 2026-04-03
Supplement: Supplementary file 14 [file a0f0e11d794e21e8ec2876b5.xlsx]

## Sheet: ST6. Biol.func_NI-noGxA
Supplementary Table 6. Brief description of the biological insights of novel locus genes for blood pressure with non-significant gene-alcohol interaction
Locus	Trait	Alcohol Class	Sex Class	N	Group	Chr:Position (hg38)	Lead Variant	Nearest Gene	Biological Insights
1p32.3	DBP	HEAVYvsNEVER	COMBINED	363346	CPMA	1:53115998	rs3820201	SLC1A7	On locus 1p32.3, a suggestive association was found between the SHISAL2A gene and the DBP change trajectory in a GWAS analysis (P=7x10-7 in cross populations, PMID: 33603002).
1p31.3	DBP	CURDRINK	COMBINED	1099520	CPMA	1:65676847	rs4655779	LEPR / PDE4B	Locus 1p31.3 contains genes linked to blood pressure (BP). (1) The LEPR gene encodes the leptin receptor. Leptin, a hormone produced by adipose tissue, binds to LEPR in the hypothalamus, activating sympathetic nervous system pathways that raise BP. In rodent models, elevated leptin levels associated with diet-induced obesity lead to increased BP, suggesting that leptin mediates the rise in BP in …
1q42.11- q42.12	SBP	CURDRINK	COMBINED	1123620	CPMA	1:224389695	rs16847945	WDR26	Locus 1q42.11-q42.12 contains the WDR26 gene, which is linked to BP. (1) A study analyzing gene expression in spontaneously hypertensive rats (SHR) found that Wdr26 was downregulated in the SHR group compared to normotensive controls. This downregulation was associated with increased oxidative stress, a known contributor to HTN, suggesting that Wdr26 may play a role in mitigating oxidative stress…
2p22.1	SBP	LIGHTvsNEVER	MALE	301746	CPMA	2:39542624	rs56203058	MAP4K3-DT	N.A.
2p16.1	SBP	HEAVYvsLIGHT	COMBINED	750591	CPMA	2:57764977	rs13032423	ACTG1P22 / VRK2	N.A.
3p14.1	SBP	LIGHTvsNEVER	COMBINED	623618	CPMA	3:68823375	rs28475377	TAFA4	N.A.
3q27.3	PP	CURDRINK	COMBINED	765630	EUR	3:187170359	rs77209823	RPL39L / RTP1	Locus 3q27.3 contains genes linked to BP levels. (1) The protein encoded by MASP1 (MASP-1) has been shown to increase endothelial permeability, potentially affecting vascular resistance and contributing to changes in BP (PMID: 31130964, 37298134). (2) A study of individuals with type 2 diabetes (T2DM) found that RTP4 expression levels were significantly associated with future HTN incidence, sugge…
				871116	CPMA
4q28.3	SBP	CURDRINK	COMBINED	1071610	CPMA	4:136177315	rs1283032	LINC00613 / LOC124900864	N.A.
5q23.1	PP	LIGHTvsNEVER	FEMALE	8843	HIS	5:117929459	rs72786706	LINC02147	(1) On locus 5q23.1, a suggestive association was found between LINC02147-rs147753900 and the DBP change trajectory in a trans-ethnic meta-analysis (P=5x10-7, PMID 33603002). The LINC02147-rs147753900 is in linkage equilibrium with the current BP association (rs7278670, D'=0.1152, r2=0.0048, All populations, https://ldlink.nih.gov/ ).
6p12.3	PP	CURDRINK	COMBINED	994732	CPMA	6:49388720	rs9357615	LOC124901478 / MMUT	(1) On locus 6p12.3, a suggestive association was found between C6orf141-GLYATL3 genes and DBP (P=6x10-6, PMID: 34586716). (rs9357615 is not in the 1000G reference panel. So, the LD is not provided in https://ldlink.nih.gov/ ).
6q12	DBP	LIGHTvsNEVER	COMBINED	609477	CPMA	6:63442460	rs59370398	LGSN	N.A.
6q21	SBP	CURDRINK	COMBINED	1132400	CPMA	6:107013848	rs57683689	CD24 / MTRES1	Locus 6q21 contains the PDSS2 gene, which is associated with BP levels. The PDSS2 encodes a mitochondrial enzyme involved in the biosynthesis of coenzyme Q10 (CoQ10, also known as ubiquinone). (1) A meta-analysis of randomized controlled trials found that CoQ10 supplementation significantly reduced SBP by up to 17 mmHg and DBP by up to 10 mmHg in patients with essential HTN (PMID: 17287847). (2) …
6q23.3	SBP	HEAVYvsLIGHT	COMBINED	652412	CPMA	6:135813807	6:135813807	LOC101928326 / PDE7B	Locus 6q23.3 contains the PDE7B gene, which is involved in BP regulation. (1) A study found that the CMIP-PDE7B-cAMP pathway plays a role in the development of preeclampsia (PE), a pregnancy-related HTN disorder. Downregulation of CMIP (c-Maf-inducing protein) in trophoblast cells led to upregulation of PDE7B, resulting in reduced cAMP levels. This cascade impaired trophoblast function, contribut…
7p21.3	SBP	HEAVYvsLIGHT	COMBINED	750328	CPMA	7:12744757	rs12540769	ARL4A / LOC105375158	N.A.
7q11.22	DBP	LIGHTvsNEVER	MALE	234853	EUR	7:72449986	rs2969138	CALN1	Locus 7q11.22 contains genes linked to BP. (1) CALN1 plays a role in aldosterone production, functioning in the distal tubules of the kidney, and is essential for sodium homeostasis, contributing to BP regulation (PMID: 29109191). (2) CALN1 expression was 4.4 times greater in aldosterone-producing adenoma cells than in non-functioning adrenocortical adenomas. Suppressing CALN1 expression inhibite…
7q11.23	PP	CURDRINK	COMBINED	1138500	CPMA	7:77108751	rs72508681	SPDYE18 / CCDC146	N.A.
7q31.1	DBP	CURDRINK	COMBINED	1096580	CPMA	7:114688105	rs1456021	FOXP2	Locus 7q31.1 contains the FOXP2 gene, which is linked to BP. (1) In a rat model of preeclampsia, FOXP2 overexpression upregulated LAMA4 expression, resulting in lower SBP and DBP, thereby alleviating preeclampsia by regulating trophoblast behavior. These changes suggest a potential role of FOXP2/LAMA4 in BP modulation (PMID: 39487340). (2) Additionally, a suggestive association was found between …
8p23.2	DBP	HEAVYvsNEVER	FEMALE	110850	CPMA	8:2519003	rs58006665	MYOM2 / LINC03021	Locus 8p23.2 contains the CSMD1 gene, which is linked to BP. (1) The CSMD1 was significantly associated with increased HTN risk in two Korean cohorts (rs995322: meta-analysis P = 1.00x10⁻⁴, PMID: 19960030). (2) Additionally, in a study involving Italian cohorts of never-treated essential HTN patients, CSMD1 was identified as a plausible candidate gene affecting SBP response to hydrochlorothiazide…
9p22.3	SBP	CURDRINK	FEMALE	493640	CPMA	9:15706643	rs10810431	CCDC171	N.A.
9q21.12- q21.13	DBP	HEAVYvsLIGHT	COMBINED	694392	CPMA	9:71171194	rs1854556	TRPM3	Locus 9q21.12-q21.13 contains the TRPM3 gene, which is linked to BP. (1) TRPM3 is expressed in renal tissues and contributes to the regulation of renal blood flow and sodium handling. In mouse models, deletion of the TRPM3 resulted in lower baseline BP and resistance to angiotensin II-induced hypertension, indicating its role in maintaining normal BP levels (doi.org/10.1016/j.bpj.2024.11.2421).
9q21.13	PP	CURDRINK	COMBINED	1145400	CPMA	9:71917710	rs13283858	C9orf85	N.A.
10q11.22	SBP	CURDRINK	COMBINED	1143500	CPMA	10:48182406	rs769009	FRMPD2	Locus 10q11.22 contains genes linked to BP. (1) MAPK8 plays a key role in the c-Jun N-terminal kinase (JNK) signaling pathway, which modulates inflammatory responses. The dysregulation of the c-JNK pathway is associated with elevated BP and affects immune responses (doi.org/10.1016/j.phyplu.2024.100564). (2) MAPK8 is involved in both the genetic predisposition and the cellular mechanisms that con…
10q26.2	DBP	HEAVYvsLIGHT	COMBINED	750280	CPMA	10:127982989	rs11015991	PTPRE	Locus 10q26.2 contains the MKI67 gene, which is linked to BP. (1) Suppressing MKI67 expression led to decreased proliferation and migration of pulmonary artery smooth muscle cells. This suggests that MKI67 contributes to vascular remodeling processes characteristic of pulmonary hypertension and may serve as a potential biomarker or therapeutic target for PH (PMID: 36389368). (2) In patients with …
12q21.31	SBP	CURDRINK	COMBINED	1147240	CPMA	12:83724138	rs7304034	TMTC2 / LOC107984536	Locus 12q21.31 contains the LOC105369874 gene, which shows a suggestive association with resistance to HTN in the Japanese population (rs200741614: P=1.89x10-6; PMID: 34593835). The LOC105369874-rs200741614 is in linkage equilibrium with the current BP association (rs7304034: r2=0.0035 and D’=0.3356, All populations, https://ldlink.nih.gov/ ).
13q21.31	SBP	CURDRINK	COMBINED	1147240	CPMA	13:62297695	rs599310	LINC01075 / LINC01074	N.A.
14q23.2	SBP	HEAVYvsLIGHT	COMBINED	745913	CPMA	14:61832287	rs17099248	SYT16	Locus 14q23.2 contains the HIF1A gene, which influences BP through various mechanisms. HIF1A encodes a transcription factor known as hypoxia-inducible factor-1α (HIF-1α), which modulates vascular tone by regulating the expression of genes involved in vasodilation and vasoconstriction. (1) Under hypoxic conditions, activation of HIF-1α can lead to pulmonary vascular remodeling, contributing to pul…
17q12-q21.1	DBP	CURDRINK	MALE	607140	CPMA	17:39740603	rs72832924	GRB7	Locus 17q12-q21.1 contains genes linked to BP. (1) The NR1D1 gene encodes the Rev-erbα protein, which regulates BP by influencing circadian rhythms, metabolism, and inflammation (PMID: 39472573, 39961935). A study revealed that Nr1d1 protein expression was elevated in both rodent intermittent hypoxia (IH)-induced PH lung tissues and human pulmonary artery smooth muscle cells (PMID: 39472573). The…
20p11.23	DBP	CURDRINK	COMBINED	1071620	CPMA	20:21260779	rs6035820	KIZ / XRN2	N.A.
20q13.2	DBP	CURDRINK	COMBINED	1147150	CPMA	20:52407694	rs4371408	LOC105372666	N.A.
22q11.21	SBP	CURDRINK	COMBINED	1138150	CPMA	22:20714371	rs641901	PI4KA	N.A.
22q12.3	SBP	CURDRINK	COMBINED	1048390	CPMA	22:33681047	rs3831698	LARGE	On locus 22q12.3, there is a suggestive association between LINC01643-rs5749739 and DBP (P=4x10-7, PMID: 32902719) in the Arab population.
Population groups: AFR, African; BRA, Brazilian; EAS, East Asian; EUR, European; HIS, Hispanic/Latino; and CPMA, cross-population meta-analysis.
Abbreviations: BP, blood pressure; DBP, diastolic BP; HTN, hypertension; PH, pulmonary hypertension;
