# Supplementary material for: Discovery of gene-alcohol interaction loci influencing blood pressure in 1.1 million individuals from multiple populations
Source: Research Square preprint supplement (doi:10.21203/rs.3.rs-9283196/v1), 2026-04-03
Supplement: Supplementary file 15 [file abb1444294f9703bf2dc91ab.xlsx]

## Sheet: ST11. Genesets
Supplementary Table 11. Significantly enriched gene sets
Category	GeneSet	N_genes	N_overlap	p	adjP	genes	link
Canonical_Pathways	REACTOME_ETHANOL_OXIDATION	11	4	7.44932e-08	0.000172119	ADH4:ADH6:ADH1B:ALDH2	http://www.gsea-msigdb.org/gsea/msigdb/human/geneset/REACTOME_ETHANOL_OXIDATION
Canonical_Pathways	WP_FATTY_ACID_OMEGAOXIDATION	12	4	1.11404e-07	0.000172119	ADH4:ADH6:ADH1B:ALDH2	http://www.gsea-msigdb.org/gsea/msigdb/human/geneset/WP_FATTY_ACID_OMEGAOXIDATION
Canonical_Pathways	KEGG_FATTY_ACID_METABOLISM	40	5	5.12308e-07	0.000527678	ADH4:ADH6:ADH1B:ACSL6:ALDH2	http://www.gsea-msigdb.org/gsea/msigdb/human/geneset/KEGG_FATTY_ACID_METABOLISM
Canonical_Pathways	REACTOME_PHASE_I_FUNCTIONALIZATION_OF_COMPOUNDS	97	5	4.20793e-05	0.0325063	ADH4:ADH6:ADH1B:CYP11B2:ALDH2	http://www.gsea-msigdb.org/gsea/msigdb/human/geneset/REACTOME_PHASE_I_FUNCTIONALIZATION_OF_COMPOUNDS
Curated_gene_sets	REACTOME_ETHANOL_OXIDATION	11	4	7.44932e-08	0.000361783	ADH4:ADH6:ADH1B:ALDH2	http://www.gsea-msigdb.org/gsea/msigdb/human/geneset/REACTOME_ETHANOL_OXIDATION
Curated_gene_sets	WP_FATTY_ACID_OMEGAOXIDATION	12	4	1.11404e-07	0.000361783	ADH4:ADH6:ADH1B:ALDH2	http://www.gsea-msigdb.org/gsea/msigdb/human/geneset/WP_FATTY_ACID_OMEGAOXIDATION
Curated_gene_sets	KEGG_FATTY_ACID_METABOLISM	40	5	5.12308e-07	0.00110915	ADH4:ADH6:ADH1B:ACSL6:ALDH2	http://www.gsea-msigdb.org/gsea/msigdb/human/geneset/KEGG_FATTY_ACID_METABOLISM
Curated_gene_sets	KIM_LIVER_CANCER_POOR_SURVIVAL_DN	42	4	2.3016e-05	0.0373722	COBLL1:ADH6:ADH1B:GPHN	http://www.gsea-msigdb.org/gsea/msigdb/human/geneset/KIM_LIVER_CANCER_POOR_SURVIVAL_DN
GO_bp	GOBP_ETHANOL_METABOLIC_PROCESS	18	4	6.76341e-07	0.00524232	ADH4:ADH6:ADH1B:ALDH2	http://www.gsea-msigdb.org/gsea/msigdb/human/geneset/GOBP_ETHANOL_METABOLIC_PROCESS
GO_bp	GOBP_ETHANOL_OXIDATION	8	3	3.33452e-06	0.0129229	ADH4:ADH6:ADH1B	http://www.gsea-msigdb.org/gsea/msigdb/human/geneset/GOBP_ETHANOL_OXIDATION
GO_mf	GOMF_ALCOHOL_DEHYDROGENASE_ACTIVITY_ZINC_DEPENDENT	6	3	1.19774e-06	0.0021224	ADH4:ADH6:ADH1B	http://www.gsea-msigdb.org/gsea/msigdb/human/geneset/GOMF_ALCOHOL_DEHYDROGENASE_ACTIVITY_ZINC_DEPENDENT
GO_mf	GOMF_ALCOHOL_DEHYDROGENASE_NAD_P_PLUS_ACTIVITY	9	3	4.98747e-06	0.0044189	ADH4:ADH6:ADH1B	http://www.gsea-msigdb.org/gsea/msigdb/human/geneset/GOMF_ALCOHOL_DEHYDROGENASE_NAD_P_PLUS_ACTIVITY
GO_mf	GOMF_NAD_RETINOL_DEHYDROGENASE_ACTIVITY	19	3	5.59106e-05	0.0330245	ADH4:ADH6:ADH1B	http://www.gsea-msigdb.org/gsea/msigdb/human/geneset/GOMF_NAD_RETINOL_DEHYDROGENASE_ACTIVITY
KEGG	KEGG_FATTY_ACID_METABOLISM	40	5	5.12308e-07	9.52894e-05	ADH4:ADH6:ADH1B:ACSL6:ALDH2	http://www.gsea-msigdb.org/gsea/msigdb/human/geneset/KEGG_FATTY_ACID_METABOLISM
KEGG	KEGG_GLYCOLYSIS_GLUCONEOGENESIS	61	4	0.000101356	0.00942615	ADH4:ADH6:ADH1B:ALDH2	http://www.gsea-msigdb.org/gsea/msigdb/human/geneset/KEGG_GLYCOLYSIS_GLUCONEOGENESIS
KEGG	KEGG_TYROSINE_METABOLISM	41	3	0.000577627	0.0358129	ADH4:ADH6:ADH1B	http://www.gsea-msigdb.org/gsea/msigdb/human/geneset/KEGG_TYROSINE_METABOLISM
Reactome	REACTOME_ETHANOL_OXIDATION	11	4	7.44932e-08	0.000123212	ADH4:ADH6:ADH1B:ALDH2	http://www.gsea-msigdb.org/gsea/msigdb/human/geneset/REACTOME_ETHANOL_OXIDATION
Reactome	REACTOME_PHASE_I_FUNCTIONALIZATION_OF_COMPOUNDS	97	5	4.20793e-05	0.0347996	ADH4:ADH6:ADH1B:CYP11B2:ALDH2	http://www.gsea-msigdb.org/gsea/msigdb/human/geneset/REACTOME_PHASE_I_FUNCTIONALIZATION_OF_COMPOUNDS
Wikipathways	WP_FATTY_ACID_OMEGAOXIDATION	12	4	1.11404e-07	8.16589e-05	ADH4:ADH6:ADH1B:ALDH2	http://www.gsea-msigdb.org/gsea/msigdb/human/geneset/WP_FATTY_ACID_OMEGAOXIDATION
microRNA_targets	MIR3128	129	6	1.24504e-05	0.0323461	COBLL1:DHFR:PDLIM4:KIF3A:TNKS:TLN2	http://www.gsea-msigdb.org/gsea/msigdb/human/geneset/MIR3128
