# Supplementary material for: Discovery of gene-alcohol interaction loci influencing blood pressure in 1.1 million individuals from multiple populations
Source: Research Square preprint supplement (doi:10.21203/rs.3.rs-9283196/v1), 2026-04-03
Supplement: Supplementary file 16 [file b7d02acbc3c19f4782f77053.xlsx]

## Sheet: ST1 Demographic & Descriptive
Supplementary Table 1. Study descriptives
Study Name	Population	Alcohol Covariate	Total N for Alcohol Covariate											N-Exposed for Alcohol Covariate
			N	% Male	% Anti-Hypertensive Meds	Age, Mean	Age, SD	SBP, Mean	SBP, SD	DBP, Mean	DBP, SD	PP, Mean	PP, SD	N-exp	% Male	% Anti-Hypertensive Meds	Age, Mean	Age, SD	SBP, Mean	SBP, SD	DBP, Mean	DBP, SD	PP, Mean	PP, SD
AGES gsa	EUR	CURDRINK	2506	43.0168	64.6049	77.2849	6.04153	151.733	22.6041	79.8587	10.8674	71.8739	18.8479	1563	47.9207	63.7876	76.5592	5.87107	151.296	22.4295	80.4888	10.9212	70.8074	18.6387
		HEAVYvsLIGHT	na	na	na	na	na	na	na	na	na	na	na	na	na	na	na	na	na	na	na	na	na	na
		HEAVYvsNEVER	na	na	na	na	na	na	na	na	na	na	na	na	na	na	na	na	na	na	na	na	na	na
		LIGHTvsNEVER	997	43.0291	62.7884	76.68	5.92735	152.407	22.6879	80.1063	10.7712	72.3009	18.7725	457	68.0525	59.9562	75.2013	5.71499	151.961	22.8019	82.0328	10.6601	69.9278	18.4121
AGES hu370CNV	EUR	CURDRINK	2937	42.0157	63.8407	76.4436	5.45788	152.214	22.2512	80.4725	10.54	71.7378	18.7085	1912	46.4958	62.8138	75.8891	5.30959	152.17	22.5602	80.7615	10.6191	71.4085	18.8117
		HEAVYvsLIGHT	na	na	na	na	na	na	na	na	na	na	na	na	na	na	na	na	na	na	na	na	na	na
		HEAVYvsNEVER	na	na	na	na	na	na	na	na	na	na	na	na	na	na	na	na	na	na	na	na	na	na
		LIGHTvsNEVER	1236	40.534	66.6667	76.5809	5.65563	153.529	21.9923	81.1462	10.4014	72.3746	18.7974	584	63.1849	64.726	75.1199	5.24095	153.735	22.1069	82.7568	10.6767	70.9777	18.6143
ARIC	AFR	CURDRINK	2841	37.2052	41.0419	53.4	5.77	134.71	23.45	83.9	13.65	50.81	16.51	905	59.116	32.9282	52.32	5.7	134.3	23.43	84.93	14.1	49.36	15.73
		HEAVYvsLIGHT	878	59.2255	32.9157	52.36	5.71	134.16	23.36	84.86	14.08	49.3	15.7	148	75	27.7027	51.24	5.25	142.37	26.93	89.11	13.51	53.26	18.93
		HEAVYvsNEVER	1440	23.6111	43.6111	53.62	5.7	136.11	24.22	84.02	13.31	52.08	17.62	148	75	27.7027	51.24	5.25	142.37	26.93	89.11	13.51	53.26	18.93
		LIGHTvsNEVER	2022	31.5529	41.2957	53.42	5.75	134.34	23.28	83.64	13.49	50.7	16.64	730	56.0274	33.9726	52.59	5.78	132.49	22.22	84	14.04	48.49	14.84
ARIC	EUR	CURDRINK	9301	47.1455	19.5678	54.28	5.69	121.33	19.53	73.54	11.56	47.79	13.32	6126	50.4734	18.1848	53.96	5.69	120.62	19.06	73.78	11.45	46.85	12.76
		HEAVYvsLIGHT	6102	50.4589	18.1416	53.95	5.69	120.61	19.07	73.76	11.43	46.84	12.77	869	55.8113	22.4396	54.26	5.74	124.69	19.75	75.19	11.42	49.5	13.33
		HEAVYvsNEVER	2482	36.3417	22.643	54.77	5.68	124	20.48	73.73	11.72	50.27	14.22	869	55.8113	22.4396	54.26	5.74	124.69	19.75	75.19	11.42	49.5	13.33
		LIGHTvsNEVER	6846	43.9819	18.6824	54.17	5.69	120.8	19.42	73.39	11.51	47.41	13.25	5233	49.57	17.4279	53.9	5.68	119.93	18.87	73.53	11.42	46.4	12.62
ASCOT-SC	EUR	CURDRINK	2462	74.4517	100	60.99	8.75	175.1	16.72	103.4	9.99	71.72	16.07	1576	82.3604	100	59.71	8.53	174.5	16.27	104.3	9.97	70.16	15.38
		HEAVYvsLIGHT	1576	82.3604	100	59.74	8.53	174.5	16.27	104.3	9.97	70.16	15.38	276	75	100	59.25	8	174.9	17.04	103.9	10.22	70.97	15.4
		HEAVYvsNEVER	na	na	na	na	na	na	na	na	na	na	na	na	na	na	na	na	na	na	na	na	na	na
		LIGHTvsNEVER	na	na	na	na	na	na	na	na	na	na	na	na	na	na	na	na	na	na	na	na	na	na
ASCOT-UK	EUR	CURDRINK	3727	82.2377	93.6947	63.68	8.11	175.3	17.31	101.6	9.88	73.73	16.05	2667	88.4889	101.35	63.19	8.13	175.1	16.98	102.1	9.71	73.01	15.54
		HEAVYvsLIGHT	2667	88.4889	91.7885	63.19	8.13	175.1	16.98	102.1	9.71	73.01	15.54	682	88.1232	90.0293	61.36	8.21	175	17.42	102.7	9.33	72.27	15.72
		HEAVYvsNEVER	na	na	na	na	na	na	na	na	na	na	na	na	na	na	na	na	na	na	na	na	na	na
		LIGHTvsNEVER	na	na	na	na	na	na	na	na	na	na	na	na	na	na	na	na	na	na	na	na	na	na
ASPREE	EUR	CURDRINK	12031	45.0918	4.77932	75.06	4.22651	140.2	16.7697	77.69	10.1678	62.53	13.7593	9608	48.4388	4.71482	74.93	4.17572	140.2	16.6731	77.85	10.0843	62.35	13.6581
		HEAVYvsLIGHT	9608	48.4388	4.71482	74.93	4.17572	140.2	16.6731	77.85	10.0843	62.35	13.6581	2548	33.752	3.21821	74.82	4.08537	140.6	16.4161	77.76	10.0416	62.81	13.454
		HEAVYvsNEVER	4387	30.1345	3.73832	75.22	4.24547	140.5	16.724	77.34	10.2277	63.14	13.7944	2548	33.752	3.21821	74.82	4.08537	140.6	16.4161	77.76	10.0416	62.81	13.454
		LIGHTvsNEVER	8899	47.8256	5.09046	75.13	4.26016	140.1	16.843	77.65	10.1842	62.48	13.8473	7060	53.7394	5.25496	74.96	4.20747	140.1	16.7641	77.88	10.1002	62.18	13.7282
ASPS	EUR	CURDRINK	810	43.3333	34.6914	65.33	8.02	149.04	26.41	90.95	12.53	58.09	17.93	268	65.6716	33.209	66.54	8.05	148.49	26.89	91.3	13.14	57.19	17.7
		HEAVYvsLIGHT	265	66.0377	32.8302	66.65	8.03	148.66	26.89	91.38	13.06	57.28	17.77	113	58.4071	35.3982	66.17	8.05	151.38	28.28	92.45	14.06	58.93	17.87
		HEAVYvsNEVER	647	36.0124	35.5487	65.04	7.99	149.75	26.58	91.1	12.59	58.64	18.03	113	58.4071	35.3982	66.17	8.05	151.38	28.28	92.45	14.06	58.93	17.87
		LIGHTvsNEVER	686	40.2332	34.5481	65.29	8.02	148.79	26.11	90.77	12.24	58.02	18	152	71.7105	30.9211	67	8.02	146.64	25.71	90.59	12.25	56.05	17.66
ASPS-Fam	EUR	CURDRINK	336	40.7738	43.75	64.57	10.61	145.65	24.74	91.19	11.08	54.46	18.37	193	51.8135	45.0777	63.93	10.6	145.81	24.33	91.24	10.09	54.58	18.64
		HEAVYvsLIGHT	193	51.8135	45.0777	63.93	10.6	145.81	24.33	91.24	10.09	54.58	18.64	91	60.4396	48.3516	63.74	10.62	147.43	22.96	92.02	10.29	55.41	18.9
		HEAVYvsNEVER	228	38.1579	44.2982	64.75	10.65	146.38	24.3	91.5	11.6	54.88	19.32	91	60.4396	48.3516	63.74	10.62	147.43	22.96	92.02	10.29	55.41	18.9
		LIGHTvsNEVER	239	32.2176	41.841	64.86	10.65	145.13	25.3	90.89	11.4	54.23	18.16	102	44.1176	42.1569	64.11	10.63	144.37	25.52	90.54	9.92	53.83	18.47
AUGUR	EUR	CURDRINK	2186	48.4446	67.1089	78.3625	5.04367	141.944	19.1971	83.1253	11.2829	58.8184	12.8041	1282	60.6084	66.9267	78.1771	4.90934	142.93	18.8856	83.6158	11.0211	59.314	12.5549
		HEAVYvsLIGHT	1282	60.6084	66.9267	78.1771	4.90934	142.93	18.8856	83.6158	11.0211	59.314	12.5549	455	40.4396	64.3956	77.8431	4.8331	141.816	19.305	83.9374	11.1505	57.8791	12.8725
		HEAVYvsNEVER	na	na	na	na	na	na	na	na	na	na	na	na	na	na	na	na	na	na	na	na	na	na
		LIGHTvsNEVER	na	na	na	na	na	na	na	na	na	na	na	na	na	na	na	na	na	na	na	na	na	na
AWI-GEN	AFR	CURDRINK	9490	49.8419	11.844	51.8119	8.12912	126.427	22.9076	79.4361	13.3024	46.9948	14.2098	4121	67.1924	5.7753	51.2679	7.37626	125.605	22.2875	79.6194	13.553	45.9888	13.1225
		HEAVYvsLIGHT	2730	61.8315	4.79853	50.6535	6.40568	122.311	20.9263	77.1542	12.3723	45.158	11.9437	908	61.674	5.72687	50.37	6.61458	123.221	20.9009	78.3001	12.4597	44.9207	12.0703
		HEAVYvsNEVER	4601	37.0137	14.6925	51.6058	8.2486	126.73	22.7912	79.4202	12.9042	47.313	14.5171	908	61.674	5.72687	50.37	6.61458	123.221	20.9009	78.3001	12.4597	44.9207	12.0703
		LIGHTvsNEVER	5515	41.1786	12.7471	51.5413	7.91317	125.698	22.6031	78.6682	12.8519	47.035	14.1014	1822	61.91	4.33589	50.7947	6.29606	121.858	20.9299	76.5822	12.2919	45.2765	11.8815
Baependi Heart Study	BRA	CURDRINK	1904	55.4622	30.7773	45.3	16.9	129.4	19.7	78.9	11.9	50.5	12.8	570	81.7544	20.5263	41.2	14.6	128	18.6	78.9	12.2	49.1	11.5
		HEAVYvsLIGHT	na	na	na	na	na	na	na	na	na	na	na	na	na	na	na	na	na	na	na	na	na	na
		HEAVYvsNEVER	na	na	na	na	na	na	na	na	na	na	na	na	na	na	na	na	na	na	na	na	na	na
		LIGHTvsNEVER	na	na	na	na	na	na	na	na	na	na	na	na	na	na	na	na	na	na	na	na	na	na
BBJ	EAS	CURDRINK	92353	62.7917	35.7671	62.3465	13.1829	138.122	20.6712	81.5355	12.7019	56.5863	14.6242	48507	76.1436	41.8888	59.9922	13.0519	137.777	20.2753	82.2424	12.7423	55.5343	13.937
		HEAVYvsLIGHT	48370	76.1815	41.8958	60.0029	13.0531	137.774	20.2686	82.2415	12.7343	55.5331	13.9369	18103	75.9985	43.2525	59.7471	12.262	139.195	20.5376	83.075	12.8535	56.1171	14.0253
		HEAVYvsNEVER	47341	49.0526	28.8714	62.7204	13.1721	138.777	21.0544	81.5114	12.8091	57.2626	14.9525	18103	75.9985	43.2525	59.7471	12.262	139.195	20.5376	83.075	12.8535	56.1171	14.0253
		LIGHTvsNEVER	59505	54.7097	30.7083	62.3206	13.6204	137.707	20.7253	81.1536	12.6746	56.5536	14.7379	30267	76.291	41.0843	60.156	13.5018	136.925	20.058	81.743	12.6363	55.1838	13.8721
Beijing Eye Study (BES-610)	EAS	CURDRINK	585	34.0171	39.8291	63	9	139.3	24.7	76.4	14.2	62.9	15.6	134	81.3433	36.5672	62	9	138.8	21.4	77.2	13.5	61.6	15.3
		HEAVYvsLIGHT	na	na	na	na	na	na	na	na	na	na	na	na	na	na	na	na	na	na	na	na	na	na
		HEAVYvsNEVER	535	29.7196	39.6262	63	9	139.2	24.8	76.3	14.2	62.9	15.5	111	82.8829	34.2342	62	9	138.8	20.7	77.4	13.4	61.3	14.7
		LIGHTvsNEVER	na	na	na	na	na	na	na	na	na	na	na	na	na	na	na	na	na	na	na	na	na	na
Beijing Eye Study (BES-omni)	EAS	CURDRINK	556	41.7266	45.1439	66	10	134.9	22.5	73	13.2	62	14.8	78	87.1795	32.0513	63	9	134.5	22.7	75.9	15	58.6	14.8
		HEAVYvsLIGHT	na	na	na	na	na	na	na	na	na	na	na	na	na	na	na	na	na	na	na	na	na	na
		HEAVYvsNEVER	515	38.0583	45.6311	66	10	135.4	22.8	73.1	13.3	62.3	15	60	88.3333	31.6667	64	10	137.7	22.7	77.8	15.2	59.9	15.4
		LIGHTvsNEVER	na	na	na	na	na	na	na	na	na	na	na	na	na	na	na	na	na	na	na	na	na	na
BHRC	HIS	CURDRINK	3636	37.4862	21.7822	45.7722	19.4457	121.498	21.0592	74.4134	10.6364	47.083	14.8581	561	71.836	17.1123	46.1164	16.534	123.556	18.753	77.2478	10.6359	46.3084	12.4431
		HEAVYvsLIGHT	524	74.2366	16.0305	46.32	16.45	123.29	18.45	77.05	10.52	46.25	12.15	109	80.7339	12.844	46.32	16.18	126.34	17.61	79.1	11.02	47.24	10.78
		HEAVYvsNEVER	2192	30.2464	23.2208	45.7604	20.9973	121.642	21.6006	73.6857	10.5863	47.9542	15.5689	109	80.7339	12.844	46.32	16.18	126.34	17.61	79.1	11.02	47.24	10.78
		LIGHTvsNEVER	2498	35.0681	22.6181	45.8291	20.5143	121.578	21.2733	73.9179	10.5245	47.6584	15.2975	415	72.5301	16.8675	46.32	16.54	122.5	18.61	76.51	10.33	45.99	12.48
BHS	AFR	CURDRINK	187	26.738	55.0802	49	4.8	136	22.4	87	13.1	49	12.7	91	32.967	52.7473	49	4.6	136	22.9	87	12.9	49	13.5
		HEAVYvsLIGHT	na	na	na	na	na	na	na	na	na	na	na	na	na	na	na	na	na	na	na	na	na	na
		HEAVYvsNEVER	na	na	na	na	na	na	na	na	na	na	na	na	na	na	na	na	na	na	na	na	na	na
		LIGHTvsNEVER	na	na	na	na	na	na	na	na	na	na	na	na	na	na	na	na	na	na	na	na	na	na
BHS	EUR	CURDRINK	437	41.4188	30.2059	50	4.3	125	16	80	10.8	45	9.1	253	44.2688	23.7154	49	4.4	125	15.8	80	11	45	8.6
		HEAVYvsLIGHT	253	44.2688	23.7154	49	4.4	125	15.8	80	11	45	8.6	54	48.1481	24.0741	50	4	126	14	80	10.1	46	8.8
		HEAVYvsNEVER	na	na	na	na	na	na	na	na	na	na	na	na	na	na	na	na	na	na	na	na	na	na
		LIGHTvsNEVER	na	na	na	na	na	na	na	na	na	na	na	na	na	na	na	na	na	na	na	na	na	na
BioMe	AFR	CURDRINK	1427	38.8227	64.541	50.28	14.84	140.29	24.43	81.42	13.86	58.88	17.57	630	36.9841	58.254	47.37	14.83	138.16	24.13	81.38	13.86	56.78	17.03
		HEAVYvsLIGHT	na	na	na	na	na	na	na	na	na	na	na	na	na	na	na	na	na	na	na	na	na	na
		HEAVYvsNEVER	na	na	na	na	na	na	na	na	na	na	na	na	na	na	na	na	na	na	na	na	na	na
		LIGHTvsNEVER	na	na	na	na	na	na	na	na	na	na	na	na	na	na	na	na	na	na	na	na	na	na
BioMe	HIS	CURDRINK	2206	37.126	56.7996	50.52	15.57	135.11	22.64	77.95	12.53	57.16	16.85	859	41.9092	44.5867	45.6	14.69	130.47	21.66	77.58	12.92	52.89	15.42
		HEAVYvsLIGHT	na	na	na	na	na	na	na	na	na	na	na	na	na	na	na	na	na	na	na	na	na	na
		HEAVYvsNEVER	na	na	na	na	na	na	na	na	na	na	na	na	na	na	na	na	na	na	na	na	na	na
		LIGHTvsNEVER	na	na	na	na	na	na	na	na	na	na	na	na	na	na	na	na	na	na	na	na	na	na
BRIGHT	EUR	CURDRINK	1751	39.9772	91.719	57.05	11.04	167.8	21.39	103.1	11.03	64.71	16.07	1103	49.864	91.1151	56.2	10.78	168	20.72	103.7	10.67	64.41	15.55
		HEAVYvsLIGHT	970	51.9588	90.9278	55.91	10.79	168.8	20.65	104.1	10.65	64.72	15.98	210	47.619	90.9524	54.81	10.75	168.6	20.36	104.3	10.61	64.32	15.57
		HEAVYvsNEVER	na	na	na	na	na	na	na	na	na	na	na	na	na	na	na	na	na	na	na	na	na	na
		LIGHTvsNEVER	na	na	na	na	na	na	na	na	na	na	na	na	na	na	na	na	na	na	na	na	na	na
CAGE-KING	EAS	CURDRINK	971	50.4634	24.6138	63.6601	6.38731	128.289	19.3323	75.1885	11.1198	53.1009	13.4844	407	75.9214	26.5356	63.8796	6.5313	131.516	19.211	77.5086	10.7378	54.0074	13.8371
		HEAVYvsLIGHT	405	76.2963	26.4198	63.8815	6.4972	131.541	19.2527	77.5407	10.7488	54	13.8548	139	95.6835	33.0935	63.9496	6.43622	135.806	19.7227	80.1295	10.436	55.6763	15.1209
		HEAVYvsNEVER	na	na	na	na	na	na	na	na	na	na	na	na	na	na	na	na	na	na	na	na	na	na
		LIGHTvsNEVER	na	na	na	na	na	na	na	na	na	na	na	na	na	na	na	na	na	na	na	na	na	na
CARDIA	AFR	CURDRINK	949	38.6723	1.36986	24.43	3.82	111.5	11.11	69.28	9.98	42.21	9.57	770	39.6104	1.2987	24.7	3.71	111.7	11.04	68.97	10.08	42.69	9.67
		HEAVYvsLIGHT	765	39.6078	1.30719	24.69	3.71	111.7	11.04	68.97	10.06	42.7	9.69	75	52	0	26.04	3.18	113.5	12.69	69.88	10.66	43.57	9.38
		HEAVYvsNEVER	191	40.8377	0.52356	23.83	3.99	111.5	12.32	70.23	10.06	41.23	9.2	75	52	0	26.04	3.18	113.5	12.69	69.88	10.66	43.57	9.38
		LIGHTvsNEVER	806	37.5931	1.36476	24.24	3.82	111.3	11.01	69.1	9.97	42.19	9.64	690	38.2609	1.44928	24.54	3.74	111.5	10.84	68.88	10	42.61	9.72
CARDIA	EUR	CURDRINK	1662	46.6306	0.661853	25.56	3.34	109.2	11.01	68.39	9.22	40.86	8.93	1531	46.8975	0.718485	25.59	3.32	109.3	11.03	68.43	9.22	40.87	8.86
		HEAVYvsLIGHT	1525	47.0164	0.721311	25.6	3.31	109.3	11.04	68.42	9.22	40.87	8.87	242	45.8678	0.413223	25.63	3.31	109.8	10.63	68.35	8.92	41.47	9.16
		HEAVYvsNEVER	298	43.6242	0.33557	25.31	3.49	109.6	10.62	68.52	9.19	41.12	9.16	242	45.8678	0.413223	25.63	3.31	109.8	10.63	68.35	8.92	41.47	9.16
		LIGHTvsNEVER	1339	46.6766	0.746826	25.53	3.35	109.2	11.09	68.47	9.32	40.71	8.82	1283	47.233	0.779423	25.6	3.31	109.2	11.12	68.44	9.27	40.76	8.81
CHS	AFR	CURDRINK	822	37.23	62.77	72.8577	5.66829	151.292	24.9376	81.4245	12.449	69.7937	19.6272	163	63.1902	52.7607	71.1779	4.82396	148.594	24.1087	82.8827	12.678	65.7111	18.498
		HEAVYvsLIGHT	na	na	na	na	na	na	na	na	na	na	na	na	na	na	na	na	na	na	na	na	na	na
		HEAVYvsNEVER	na	na	na	na	na	na	na	na	na	na	na	na	na	na	na	na	na	na	na	na	na	na
		LIGHTvsNEVER	na	na	na	na	na	na	na	na	na	na	na	na	na	na	na	na	na	na	na	na	na	na
CHS	EUR	CURDRINK	3251	39.0341	35.6813	72.3205	5.36605	140.472	23.5362	73.9843	12.5067	66.4682	18.8812	1117	50.761	31.7816	71.9481	5.10859	139.066	23.6847	74.3644	12.6091	64.7014	18.7875
		HEAVYvsLIGHT	1106	50.9042	31.9168	71.9674	5.11026	138.949	23.6499	74.3409	12.6399	64.608	18.7408	326	40.184	35.2761	71.7699	4.85093	142.885	23.9363	75.135	12.0879	67.75	19.5595
		HEAVYvsNEVER	na	na	na	na	na	na	na	na	na	na	na	na	na	na	na	na	na	na	na	na	na	na
		LIGHTvsNEVER	na	na	na	na	na	na	na	na	na	na	na	na	na	na	na	na	na	na	na	na	na	na
Cilento	EUR	CURDRINK	1236	42.9612	36.0841	56.6286	19.3737	124.563	21.8423	78.3748	11.82	46.188	14.0008	494	67.004	41.2955	60.7935	17.8779	129.579	20.0132	80.6049	11.1587	48.9743	13.585
		HEAVYvsLIGHT	443	67.9458	42.8894	62.2506	16.9669	128.927	20.0575	80.3529	11.2791	48.5741	13.5009	346	62.7168	42.7746	62.3439	16.6251	129.199	20.357	80.7033	11.8005	48.4961	13.3273
		HEAVYvsNEVER	na	na	na	na	na	na	na	na	na	na	na	na	na	na	na	na	na	na	na	na	na	na
		LIGHTvsNEVER	na	na	na	na	na	na	na	na	na	na	na	na	na	na	na	na	na	na	na	na	na	na
CoLaus	EUR	CURDRINK	5187	47.3491	20.6863	53.58	10.74	131.67	20.37	81.44	12.05	50.23	13.17	3797	54.6221	19.7261	53.7	10.68	131.91	20.07	81.62	12.07	50.3	12.85
		HEAVYvsLIGHT	3787	54.6871	19.7518	53.7	10.67	131.92	20.08	81.61	12.08	50.31	12.86	844	55.8057	20.9716	54.5	9.98	135.41	20.92	83.78	12.36	51.64	13.29
		HEAVYvsNEVER	na	na	na	na	na	na	na	na	na	na	na	na	na	na	na	na	na	na	na	na	na	na
		LIGHTvsNEVER	na	na	na	na	na	na	na	na	na	na	na	na	na	na	na	na	na	na	na	na	na	na
CROATIA-Korcula	EUR	CURDRINK	2686	37.1556	27.0663	54.32	15.67	137.4	22.4	83.47	11.48	53.96	15.29	1213	55.1525	24.5672	53.71	15.38	138.5	22.06	83.86	11.2	54.67	15.05
		HEAVYvsLIGHT	1206	55.3897	24.6269	53.68	15.38	138.6	22.04	83.88	11.18	54.69	15.05	516	70.155	23.062	52.25	14.56	139.6	21.63	84.58	11.15	54.99	14.74
		HEAVYvsNEVER	na	na	na	na	na	na	na	na	na	na	na	na	na	na	na	na	na	na	na	na	na	na
		LIGHTvsNEVER	na	na	na	na	na	na	na	na	na	na	na	na	na	na	na	na	na	na	na	na	na	na
CROATIA-Vis	EUR	CURDRINK	950	42	23.7895	56.14	15.57	141.4	27.07	83.05	12.67	58.4	19.4	554	57.9422	21.4801	55.13	15.13	140.4	26.45	83.33	12.84	57.1	18.27
		HEAVYvsLIGHT	551	58.2577	21.5971	55.18	15.04	140.5	26.46	83.37	12.85	57.13	18.28	242	61.9835	23.9669	54.18	13.97	141.9	27.04	84.41	13.03	57.53	18.14
		HEAVYvsNEVER	na	na	na	na	na	na	na	na	na	na	na	na	na	na	na	na	na	na	na	na	na	na
		LIGHTvsNEVER	na	na	na	na	na	na	na	na	na	na	na	na	na	na	na	na	na	na	na	na	na	na
CRONICAS	HIS	CURDRINK	677	49.78	4.58	55.5	12.4	130.6	16.3	83.6	9.5	47	10.9	239	77.4059	2.09205	51	10.5	130	13	84.5	9.44	45.5	7.64
		HEAVYvsLIGHT	na	na	na	na	na	na	na	na	na	na	na	na	na	na	na	na	na	na	na	na	na	na
		HEAVYvsNEVER	na	na	na	na	na	na	na	na	na	na	na	na	na	na	na	na	na	na	na	na	na	na
		LIGHTvsNEVER	na	na	na	na	na	na	na	na	na	na	na	na	na	na	na	na	na	na	na	na	na	na
DHS-AA	AFR	CURDRINK	587	42.0784	77.1721	56.0034	9.67598	145.124	20.7788	85.1831	12.2527	59.9412	16.8949	114	65.7895	71.0526	54.9474	9.78154	144.123	19.811	86.7632	13.28	57.3597	14.393
		HEAVYvsLIGHT	na	na	na	na	na	na	na	na	na	na	na	na	na	na	na	na	na	na	na	na	na	na
		HEAVYvsNEVER	na	na	na	na	na	na	na	na	na	na	na	na	na	na	na	na	na	na	na	na	na	na
		LIGHTvsNEVER	na	na	na	na	na	na	na	na	na	na	na	na	na	na	na	na	na	na	na	na	na	na
DIACORE	EUR	CURDRINK	2707	60.6206	80.1625	65.3781	9.17276	152.238	20.4422	84.6413	11.4914	67.5966	17.0007	1357	80.3979	77.5239	65.7889	8.86207	152.026	20.3483	84.9816	11.293	67.0442	16.7534
		HEAVYvsLIGHT	1357	80.4	77.52	65.3781	9.17276	152.238	20.4422	84.6413	11.4914	67.5966	17.0007	330	83.6364	79.3939	66.6354	7.72792	154.718	20.0078	84.9212	10.4037	69.797	16.4189
		HEAVYvsNEVER	na	na	na	na	na	na	na	na	na	na	na	na	na	na	na	na	na	na	na	na	na	na
		LIGHTvsNEVER	na	na	na	na	na	na	na	na	na	na	na	na	na	na	na	na	na	na	na	na	na	na
DR's EXTRA	EUR	CURDRINK	1229	47.1928	41.4972	66.4829	5.37336	154.307	22.302	87.57	10.678	66.736	17.6898	1056	49.4318	40.7197	66.259	5.35577	154.154	22.2398	87.82	10.82	66.3329	17.5527
		HEAVYvsLIGHT	734	55.9946	40.327	66.0054	5.24628	153.8	22.5005	88.26	10.912	65.5388	17.3344	115	54.7826	38.2609	64.0965	4.5667	151.965	20.4832	89.42	10.389	62.5478	16.2903
		HEAVYvsNEVER	219	41.0959	40.1826	66.1948	5.26345	153.411	20.9546	87.62	10.431	67.79	17.2446	115	54.7826	38.2609	64.0965	4.5667	151.965	20.4832	89.42	10.389	62.5478	16.2903
		LIGHTvsNEVER	723	51.8672	40.9405	66.67	5.30374	154.266	22.6458	87.7	10.911	66.5664	17.526	619	56.2197	40.7108	66.36	5.29094	154.141	22.8549	88.05	11.002	66.0945	17.4777
ELISABET	EUR	CURDRINK	2725	48.6972	23.9633	53.3	7.25	132.5	21.9	85.08	13.15	47.23	13.45	1864	57.1888	24.9464	54.08	7.07	134.5	22	86	13.16	48.23	13.52
		HEAVYvsLIGHT	1859	57.2889	24.9597	54.1	7.07	134.5	22	86	13.18	48.24	13.5	619	93.538	30.0485	55.32	6.59	142.3	22	89.48	13.16	52.54	14.26
		HEAVYvsNEVER	na	na	na	na	na	na	na	na	na	na	na	na	na	na	na	na	na	na	na	na	na	na
		LIGHTvsNEVER	na	na	na	na	na	na	na	na	na	na	na	na	na	na	na	na	na	na	na	na	na	na
Ely	EUR	CURDRINK	1431	46.1915	22.7114	61.1467	9.14795	135.035	18.3307	80.8762	11.2604	54.1591	10.2726	850	55.5294	19.6471	60.4261	8.99615	134.153	17.4259	80.5992	10.9167	53.5536	9.65529
		HEAVYvsLIGHT	848	55.5425	19.6934	60.4378	9.00195	134.152	17.4338	80.5877	10.9209	53.564	9.65968	160	50.625	16.875	59.7569	8.27892	133.533	15.4977	80.3335	9.67847	53.1999	9.17249
		HEAVYvsNEVER	na	na	na	na	na	na	na	na	na	na	na	na	na	na	na	na	na	na	na	na	na	na
		LIGHTvsNEVER	na	na	na	na	na	na	na	na	na	na	na	na	na	na	na	na	na	na	na	na	na	na
EPIC-Norfolk	EUR	CURDRINK	19090	46.9408	18.1351	59.1659	9.20036	138.033	20.1191	84.3256	12.1879	53.7059	11.2462	13013	54.8067	16.0609	58.5448	9.16804	137.253	19.7727	84.1677	12.1233	53.0827	11.0081
		HEAVYvsLIGHT	12998	54.8007	16.0717	58.5505	9.17017	137.244	19.7773	84.162	12.1248	53.0799	11.0111	1861	47.6088	14.6158	57.4541	9.16048	138.141	19.8214	85.1475	12.1992	52.9764	10.9533
		HEAVYvsNEVER	2792	38.861	18.9828	59.2876	9.29224	139.708	20.2387	85.4552	12.3018	54.2418	11.2778	1861	47.6088	14.6158	57.4541	9.16048	138.141	19.8214	85.1475	12.1992	52.9764	10.9533
		LIGHTvsNEVER	12068	53.3311	17.1942	59.0592	9.17448	137.538	19.8991	84.1572	12.1472	53.3806	11.1013	11137	56.0025	16.315	58.7338	9.1594	137.095	19.7668	83.9973	12.1051	53.0972	11.0211
EstBB	EUR	CURDRINK	50448	34.3582	0.903901	44.528	17.4496	126.305	17.7891	77.7823	10.8917	48.5217	12.4994	41256	36.9352	0.82897	43.2937	16.8116	125.702	17.4899	77.6115	10.8513	48.0898	12.1976
		HEAVYvsLIGHT	41256	36.9352	0.82897	43.2937	16.8116	125.702	17.4899	77.6115	10.8513	48.0898	12.1976	3672	69.3083	0.272331	39.4674	14.7192	127.997	17.2794	79.0825	11.5011	48.9166	11.6755
		HEAVYvsNEVER	9853	35.8774	0.568355	45.7818	18.6732	128.649	18.3174	78.6509	11.1777	49.9972	13.0147	3672	69.3083	0.272331	39.4674	14.7192	127.997	17.2794	79.0825	11.5011	48.9166	11.6755
		LIGHTvsNEVER	43765	31.2647	0.863704	44.4962	17.495	125.98	17.7426	77.5987	10.8081	48.3806	12.4954	37584	33.7723	0.883355	43.6676	16.9562	125.477	17.4944	77.4677	10.7751	48.0091	12.2446
EXCEED	EUR	CURDRINK	4252	43.7206	27.7281	58.71	8.15	135.06	16.86	80.99	10.29	54.06	12.39	2903	50.7751	26.8343	58.83	8.07	135.07	16.74	81.01	10.34	54.06	12.04
		HEAVYvsLIGHT	2897	50.7421	26.7863	58.83	8.07	135.06	16.75	81	10.35	54.06	12.05	1109	43.0117	27.6826	58.79	8.02	135.9	17.26	81.6	10.71	54.3	12.13
		HEAVYvsNEVER	2211	34.0118	28.2678	58.62	8.21	135.3	17.3	81.23	10.44	54.07	12.65	1109	43.0117	27.6826	58.79	8.02	135.9	17.26	81.6	10.71	54.3	12.13
		LIGHTvsNEVER	2890	43.8754	27.2318	58.7	8.22	134.6	16.77	80.72	10.11	53.88	12.44	1788	55.5369	26.2304	58.85	8.11	134.55	16.41	80.63	10.1	53.91	12
Fenland	EUR	CURDRINK	8236	48.203	8.1593	48.8912	7.36485	124.279	16.6639	75.2825	10.8806	49.0034	9.79897	6939	49.5316	7.98386	48.9819	7.34051	124.404	16.6838	75.2833	10.8937	49.1293	9.77203
		HEAVYvsLIGHT	6926	49.538	7.98441	48.9799	7.34417	124.389	16.6874	75.2697	10.8956	49.1283	9.77482	2291	44.653	8.11873	49.3971	7.15287	124.965	17.0621	75.4565	10.9412	49.5082	9.89441
		HEAVYvsNEVER	2833	43.2757	8.71867	49.3042	7.24295	124.67	17.0106	75.3526	10.8816	49.3172	10.0045	2291	44.653	8.11873	49.3971	7.15287	124.965	17.0621	75.4565	10.9412	49.5082	9.89441
		LIGHTvsNEVER	5177	50.4346	8.26734	48.7881	7.44715	124.034	16.5202	75.1497	10.8465	48.8954	9.78812	4635	51.9525	7.91802	48.7737	7.42902	124.105	16.4935	75.1773	10.8729	48.9405	9.71074
FHS	EUR	CURDRINK	3692	46.8581	29.0628	53.572	16.051	127.435	20.136	77.281	10.784	50.155	16.225	2029	54.1153	25.5791	51.44	15.606	126.542	19.338	77.752	10.748	48.791	14.964
		HEAVYvsLIGHT	2029	54.1153	25.5791	51.44	15.606	126.542	19.338	77.752	10.748	48.791	14.964	560	50.8929	28.75	51.121	15.264	129.555	20.154	78.798	11.405	50.769	15.47
		HEAVYvsNEVER	846	43.2624	36.9976	57.168	16.267	132.523	20.842	78.277	11.329	54.249	17.077	560	50.8929	28.75	51.121	15.264	129.555	20.154	78.798	11.405	50.769	15.47
		LIGHTvsNEVER	1755	50.9402	29.0598	54.409	16.357	127.502	19.831	77.339	10.571	50.157	16.024	1469	55.3438	24.3703	51.561	15.738	125.394	18.898	77.355	10.464	48.039	14.703
FUSION_CASES	EUR	CURDRINK	715	55.2448	62.7972	63.7	7.4	161.7	25	90.8	12.7	70.9	20.1	484	65.4959	63.2231	62.7	7.2	161.1	25.2	91.9	13.4	69.3	19.7
		HEAVYvsLIGHT	na	na	na	na	na	na	na	na	na	na	na	na	na	na	na	na	na	na	na	na	na	na
		HEAVYvsNEVER	na	na	na	na	na	na	na	na	na	na	na	na	na	na	na	na	na	na	na	na	na	na
		LIGHTvsNEVER	na	na	na	na	na	na	na	na	na	na	na	na	na	na	na	na	na	na	na	na	na	na
FUSION_CNTRLS	EUR	CURDRINK	258	29.4574	30.2326	63.7	7.7	148.9	22.9	86.5	11.9	62.4	17.3	201	32.3383	28.8557	63.3	8	147.7	21.7	85.9	11.7	61.8	16.5
		HEAVYvsLIGHT	na	na	na	na	na	na	na	na	na	na	na	na	na	na	na	na	na	na	na	na	na	na
		HEAVYvsNEVER	na	na	na	na	na	na	na	na	na	na	na	na	na	na	na	na	na	na	na	na	na	na
		LIGHTvsNEVER	na	na	na	na	na	na	na	na	na	na	na	na	na	na	na	na	na	na	na	na	na	na
Generation Scotland	EUR	CURDRINK	18133	41.5486	13.423	47.19	14.87	133.3	19.73	80.95	11.32	52.37	13.17	14425	45.2409	12.8666	47.14	14.63	133.7	19.54	81.23	11.3	52.47	12.92
		HEAVYvsLIGHT	14395	45.231	12.8656	47.15	14.63	133.7	19.51	81.22	11.29	52.46	12.9	3479	47.0538	12.2162	45.04	14.58	134.7	19.78	82.11	11.65	52.59	12.73
		HEAVYvsNEVER	6819	37.1755	13.5944	45.97	15.22	133.2	20.11	81	11.52	52.21	13.36	3479	47.0538	12.2162	45.04	14.58	134.7	19.78	82.11	11.65	52.59	12.73
		LIGHTvsNEVER	14256	40.4882	13.5311	47.61	14.88	133	19.65	80.68	11.19	52.28	13.21	10916	44.6501	13.0726	47.82	14.58	133.4	19.42	80.93	11.16	52.42	12.96
GENOA	AFR	CURDRINK	1002	29.7405	56.5868	56.32	11.22	143.91	25.07	86.72	14.45	57.19	18.43	376	39.3617	47.6064	53.19	9.67	139.47	23.01	86.57	14.51	52.9	14.9
		HEAVYvsLIGHT	222	46.3964	50	52.23	9.73	141.1	23.68	88.13	14.95	52.97	15.5	13	38.4615	30.7692	50.35	6.48	135.85	14.46	85.31	14.9	50.54	6.2
		HEAVYvsNEVER	na	na	na	na	na	na	na	na	na	na	na	na	na	na	na	na	na	na	na	na	na	na
		LIGHTvsNEVER	na	na	na	na	na	na	na	na	na	na	na	na	na	na	na	na	na	na	na	na	na	na
GENOA	EUR	CURDRINK	1436	44.9164	64.5543	55.31	10.82	142.72	19.84	88.18	12.19	54.54	14.52	1037	47.7338	62.1986	54.51	10.71	141.5	19.83	88.13	12.22	53.37	14.17
		HEAVYvsLIGHT	761	54.9277	61.2352	54.48	10.61	141.76	19.8	88.4	12.22	53.36	14.25	60	60	68.3333	55.58	11.37	146.8	17.75	91.57	10.72	55.23	15.83
		HEAVYvsNEVER	na	na	na	na	na	na	na	na	na	na	na	na	na	na	na	na	na	na	na	na	na	na
		LIGHTvsNEVER	na	na	na	na	na	na	na	na	na	na	na	na	na	na	na	na	na	na	na	na	na	na
GenSalt	EAS	CURDRINK	1761	52.4702	8.4611	39.2328	8.99686	117.793	15.2134	74.4286	10.8048	43.3645	9.6509	445	96.6292	8.76404	39.8067	8.29922	120.825	12.9834	77.0427	10.0713	43.7825	9.32236
		HEAVYvsLIGHT	445	96.6292	8.76404	39.8067	8.29922	120.825	12.9834	77.0427	10.0713	43.7825	9.32236	130	96.9231	6.92308	42.4462	7.59851	120.45	13.5052	77.6598	9.60585	42.7906	9.20519
		HEAVYvsNEVER	na	na	na	na	na	na	na	na	na	na	na	na	na	na	na	na	na	na	na	na	na	na
		LIGHTvsNEVER	na	na	na	na	na	na	na	na	na	na	na	na	na	na	na	na	na	na	na	na	na	na
HCHS/SOL	HIS	CURDRINK	11690	41.497	16.2447	46.0846	13.8383	124.664	20.2018	74.9077	11.9914	49.7597	13.3969	3697	62.6724	10.6032	43.3278	13.7876	124.223	18.9784	75.1237	12.0603	49.1064	12.0725
		HEAVYvsLIGHT	3687	62.7611	10.632	43.3507	13.7812	124.242	18.9812	75.1292	12.0731	49.1209	12.0744	608	67.7632	9.70395	42.9918	14.2368	126.384	19.7221	76.8372	12.7729	49.5536	12.1866
		HEAVYvsNEVER	2894	29.5093	18.2101	47.3165	14.117	126.352	21.199	75.6005	12.1737	50.7427	14.3845	608	67.7632	9.70395	42.9918	14.2368	126.396	19.7972	76.8372	12.7729	49.5592	12.2204
		LIGHTvsNEVER	5365	43.6906	14.9301	45.5713	13.9873	124.893	20.0629	74.9963	11.9418	49.896	13.3656	3079	61.7733	10.8152	43.4216	13.6907	123.819	18.8059	74.7917	11.9032	49.0354	12.0523
HCS	EUR	CURDRINK	1596	52.9449	52.8195	66.4123	7.43332	143.627	20.2213	84.1736	10.6091	59.4537	15.1685	1190	58.3193	49.7479	65.8748	7.28791	143.05	20.2169	84.4875	10.7649	58.5629	14.8941
		HEAVYvsLIGHT	1086	57.4586	49.4475	65.7477	7.26843	142.98	20.1283	84.5106	10.6918	58.4696	14.9287	590	59.322	52.3729	65.4288	7.1209	144.546	20.5247	85.6706	10.7323	58.8751	15.198
		HEAVYvsNEVER	862	49.3039	56.0325	66.4095	7.43117	145.055	20.3072	84.966	10.4705	60.0889	15.3625	590	59.322	52.3729	65.4288	7.1209	144.546	20.5247	85.6706	10.7323	58.8751	15.198
		LIGHTvsNEVER	768	45.4427	52.3438	66.9805	7.59335	142.903	19.7511	83.2394	10.2185	59.6641	15.057	496	55.2419	45.9677	66.1271	7.4295	141.118	19.5037	83.1307	10.4881	57.9872	14.6025
HRS	AFR	CURDRINK	2962	38.4537	62.9305	62.01	10.25	144.39	24.43	89.45	13.92	55.72	16.01	934	51.2848	55.7816	58.64	8.73	144.13	24.45	90.86	14.68	53.68	14.47
		HEAVYvsLIGHT	934	51.2848	55.7816	58.64	8.73	144.13	24.45	90.86	14.68	53.68	14.47	154	44.1558	48.7013	57.75	8.42	142.74	22.26	91.97	15.15	52.02	12.75
		HEAVYvsNEVER	757	29.0621	68.2959	66.19	10.72	146.24	24.31	88.94	13.63	57.69	16.27	154	44.1558	48.7013	57.75	8.42	142.74	22.26	91.97	15.15	52.02	12.75
		LIGHTvsNEVER	1383	40.7086	64.2082	62.97	10.53	145.59	24.84	89.41	13.93	56.56	15.98	780	52.6923	57.1795	58.82	8.78	144.4	24.86	90.61	14.58	54.05	14.81
HRS	EUR	CURDRINK	10248	42.984	48.507	67.41	11	137.62	22.7	84.16	12.62	53.47	14.96	4000	51.975	43.275	65.59	10.94	137.01	22.37	84.59	12.66	52.42	14.58
		HEAVYvsLIGHT	4000	51.975	43.275	65.59	10.94	137.01	22.37	84.59	12.66	52.42	14.58	755	45.8278	44.7682	63.66	10.51	140.16	22.48	87.39	13.03	52.77	14.47
		HEAVYvsNEVER	2978	37.2733	51.0074	68.37	10.76	139.09	22.83	84.41	12.77	54.68	15.04	755	45.8278	44.7682	63.66	10.51	140.16	22.48	87.39	13.03	52.77	14.47
		LIGHTvsNEVER	5468	45.6657	47.0739	67.63	10.92	137.28	22.58	83.72	12.5	53.55	14.92	3245	53.4052	42.9276	66.03	11	136.28	22.29	83.94	12.49	52.34	14.61
HTO	EUR	CURDRINK	1013	55.8736	18.7562	49.0433	15.5652	140.512	24.7466	84.4661	14.4391	56.0461	15.4499	650	65.3846	15.5385	46.6037	15.1313	138.895	23.4035	84.1479	14.2158	54.7469	14.2514
		HEAVYvsLIGHT	649	65.4854	15.5624	46.6063	15.1413	138.915	23.416	84.1512	14.2265	54.7635	14.2561	158	60.7595	13.2911	44.7199	13.6699	139.973	24.3419	85.3122	15.3864	54.6606	14.9829
		HEAVYvsNEVER	na	na	na	na	na	na	na	na	na	na	na	na	na	na	na	na	na	na	na	na	na	na
		LIGHTvsNEVER	na	na	na	na	na	na	na	na	na	na	na	na	na	na	na	na	na	na	na	na	na	na
HUFS	AFR	CURDRINK	1485	37.8451	27.9461	42.56	14.18	131.16	23.8	82.77	14.6	48.39	14.3	921	42.5624	23.4528	41.82	13.35	130.06	22.98	82.48	14.64	47.58	13.37
		HEAVYvsLIGHT	na	na	na	na	na	na	na	na	na	na	na	na	na	na	na	na	na	na	na	na	na	na
		HEAVYvsNEVER	na	na	na	na	na	na	na	na	na	na	na	na	na	na	na	na	na	na	na	na	na	na
		LIGHTvsNEVER	1342	38.7481	26.7511	42.03	14.22	130.82	23.76	82.6	14.66	48.22	14.17	892	43.2735	23.6547	41.74	13.45	130.04	23.04	82.51	14.69	47.53	13.39
HyperGEN	AFR	CURDRINK	1856	36.7996	61.5302	46.98	12.85	139	24.97	80.59	13.11	58.44	17.09	566	56.0071	45.7597	42.88	11.64	136.7	25.13	81.09	13.64	55.64	15.75
		HEAVYvsLIGHT	436	60.5505	47.2477	43.37	11.1	138.6	24.65	82.35	13.55	56.22	15.5	120	50.8333	50	44.68	11.17	142.1	27.03	84.8	14.36	57.34	17.91
		HEAVYvsNEVER	967	22.9576	68.3557	48.35	12.77	140.5	24.62	80.93	12.9	59.57	17.08	120	50.8333	50	44.68	11.17	142.1	27.03	84.8	14.36	57.34	17.91
		LIGHTvsNEVER	1163	31.2984	64.2304	47.24	12.7	139.4	23.96	80.66	12.74	58.78	16.41	316	64.2405	46.2025	42.88	11.05	137.2	23.3	81.42	13.13	55.8	14.49
HyperGEN	EUR	CURDRINK	1255	49.9602	50.8367	49.79	13.97	131	23.16	75.79	11.52	55.21	16.85	350	57.4286	37.1429	47.18	13.34	125.6	21.57	74.88	10.98	47.25	15.23
		HEAVYvsLIGHT	246	64.6341	40.2439	48.13	13.68	127.5	22.44	75.28	11.21	52.21	16.2	50	64	48	48.54	11.77	130.7	19.79	76.78	9.83	53.88	15.12
		HEAVYvsNEVER	654	42.9664	72.9358	55.01	12.93	138.8	22.65	78.03	11.69	60.79	1297	50	64	48	48.54	11.77	130.7	19.79	76.78	9.83	53.88	15.12
		LIGHTvsNEVER	800	47	66	53.69	13.59	136.4	23.47	77.34	11.83	59.02	17.61	196	64.7959	38.2653	48.03	14.15	126.7	23.05	74.9	11.53	51.78	16.47
INGI - CARL (Carlantino)	EUR	CURDRINK	464	38.5776	16.8103	49.33	16.26	132.32	22.72	81.01	11.55	50.47	14.3	191	66.4921	15.1832	52.03	15.64	134.16	20.91	82.02	10.83	51.38	14.19
		HEAVYvsLIGHT	190	66.3158	15.2632	52.12	15.63	134.18	20.97	81.93	10.78	51.49	14.15	113	67.2566	12.3894	53.72	15.1	134.47	20.37	80.6	10.48	53.25	14.12
		HEAVYvsNEVER	na	na	na	na	na	na	na	na	na	na	na	na	na	na	na	na	na	na	na	na	na	na
		LIGHTvsNEVER	na	na	na	na	na	na	na	na	na	na	na	na	na	na	na	na	na	na	na	na	na	na
INGI-FVG (Friuli Venezia Giulia)	EUR	CURDRINK	360	42.7778	22.5	52.26	16.1	138	22.88	85.59	11.29	51.28	15.97	192	57.2917	20.3125	53.98	15.49	139.91	23.03	86.47	11.03	52.43	16.46
		HEAVYvsLIGHT	192	57.2917	20.3125	53.98	15.49	139.91	23.03	86.47	11.03	52.43	16.46	82	60.9756	20.7317	52.84	14.55	140.18	23.64	87.72	12.7	51.42	16.23
		HEAVYvsNEVER	na	na	na	na	na	na	na	na	na	na	na	na	na	na	na	na	na	na	na	na	na	na
		LIGHTvsNEVER	na	na	na	na	na	na	na	na	na	na	na	na	na	na	na	na	na	na	na	na	na	na
INGI-VBI (Val Borbera)	EUR	CURDRINK	1653	44.2831	29.8851	54.72	18.31	132.89	22.44	79.06	10.93	52.34	13.99	835	60.3593	35.0898	58.81	16.87	137.07	20.97	80.78	10.33	54.53	13.73
		HEAVYvsLIGHT	835	60.3593	35.0898	58.81	16.87	137.07	20.97	80.78	10.33	54.53	13.73	261	60.5364	34.8659	59.1	15.49	138.23	19.94	81.35	10.59	55.13	12.39
		HEAVYvsNEVER	1038	35.0674	26.4933	52.02	18.28	130.47	22.68	78.15	11.23	50.99	13.62	261	60.5364	34.8659	59.1	15.49	138.23	19.94	81.35	10.59	55.13	12.39
		LIGHTvsNEVER	1351	40.8586	28.5714	53.48	18.63	131.55	22.72	78.54	10.94	51.57	14.16	574	60.2787	35.1916	58.68	17.48	136.54	21.42	80.52	10.21	54.25	14.29
IRASFS	AFR	CURDRINK	534	40.824	23.5955	42.2737	13.827	122.101	21.6684	77.1245	11.8785	44.9728	15.4646	151	59.6026	17.2185	41.647	12.7327	121.801	20.1627	77.8377	12.1853	43.9636	13.2215
		HEAVYvsLIGHT	151	59.6026	17.2185	41.647	12.7327	121.801	20.1627	77.8377	12.1853	43.9636	13.2215	54	64.8148	12.963	40.4811	12.5219	120.074	19.7492	77.6667	13.0731	42.4074	13.4565
		HEAVYvsNEVER	134	42.5373	24.6269	40.2139	14.7597	123.463	23.689	78.3209	11.9501	45.1269	18.923	54	64.8148	12.963	40.4811	12.5219	120.074	19.7492	77.6667	13.0731	42.4074	13.4565
		LIGHTvsNEVER	177	43.5028	25.4237	41.2735	14.4551	124.113	23.0333	78.3079	11.466	45.7938	17.5128	97	56.701	19.5876	42.296	12.867	122.763	20.4271	77.933	11.7313	44.8299	13.0785
IRASFS	HIS	CURDRINK	955	41.5707	8.58639	39.362	12.9493	117.137	17.3148	76.8565	10.686	40.2634	11.3042	312	54.8077	5.12821	38.4641	12.2167	117.534	15.8868	77.2901	10.5873	40.2436	10.2389
		HEAVYvsLIGHT	312	54.8077	5.12821	38.4641	12.2167	117.534	15.8868	77.2901	10.5873	40.2436	10.2389	135	73.3333	3.7037	36.422	12.0277	120.689	16.4023	78.3778	10.5263	42.3111	10.9949
		HEAVYvsNEVER	206	55.3398	7.76699	38.2716	13.9764	120.456	18.1776	77.9223	10.6149	42.4563	12.2517	135	73.3333	3.7037	36.422	12.0277	120.689	16.4023	78.3778	10.5263	42.3111	10.9949
		LIGHTvsNEVER	248	35.0806	8.87097	40.5274	13.5748	116.526	17.1854	76.631	10.6316	39.8306	11.1648	177	40.678	6.21469	40.0216	12.1633	115.127	15.0894	76.4605	10.588	38.6667	9.35045
JHS	AFR	CURDRINK	2108	38.0455	43.4535	49.72	11.99	131.1	20.95	84.38	11.85	46.73	15.57	1121	46.4764	35.95	46.73	10.55	128.2	20.02	83.58	12.05	44.65	14.11
		HEAVYvsLIGHT	na	na	na	na	na	na	na	na	na	na	na	na	na	na	na	na	na	na	na	na	na	na
		HEAVYvsNEVER	na	na	na	na	na	na	na	na	na	na	na	na	na	na	na	na	na	na	na	na	na	na
		LIGHTvsNEVER	1154	40.9879	41.5078	49.25	12.33	131.5	21.38	84.4	11.82	47.11	16.01	694	54.1787	33.2853	46.42	10.64	128.3	19.59	83.61	11.73	44.72	13.9
JUPITER	AFR	CURDRINK	787	0	65.3113	68.3037	5.07732	152.537	19.5226	91.2452	11.2482	61.2922	14.5552	68	0	55.8824	66.5	4.69201	152.118	20.8072	91.1912	13.3442	60.9265	14.3832
		HEAVYvsLIGHT	na	na	na	na	na	na	na	na	na	na	na	na	na	na	na	na	na	na	na	na	na	na
		HEAVYvsNEVER	na	na	na	na	na	na	na	na	na	na	na	na	na	na	na	na	na	na	na	na	na	na
		LIGHTvsNEVER	na	na	na	na	na	na	na	na	na	na	na	na	na	na	na	na	na	na	na	na	na	na
JUPITER	EUR	CURDRINK	2630	0	55.8555	68.9821	4.95626	143.759	18.2502	84.1224	10.2604	59.6365	13.9113	871	0	46.1538	68.4214	4.81334	143.96	19.0457	83.8588	10.5958	60.101	14.1685
		HEAVYvsLIGHT	871	0	46.1538	68.4214	4.81334	143.96	19.0457	83.8588	10.5958	60.101	14.1685	298	0	41.6107	67.8725	4.67069	144.326	18.6882	83.2651	10.3296	61.0604	14.1496
		HEAVYvsNEVER	na	na	na	na	na	na	na	na	na	na	na	na	na	na	na	na	na	na	na	na	na	na
		LIGHTvsNEVER	na	na	na	na	na	na	na	na	na	na	na	na	na	na	na	na	na	na	na	na	na	na
KoGES	EAS	CURDRINK	71859	35.9092	11.9999	54.1481	8.31107	124.375	16.9926	77.6036	10.9396	46.7712	10.4461	24124	68.1603	12.129	53.0832	8.37018	125.984	16.5499	79.3526	10.8767	46.6317	10.2439
		HEAVYvsLIGHT	24116	68.1664	12.133	53.08	8.36873	125.985	16.55	79.3532	10.8777	46.6318	10.2436	6858	79.7754	13.6337	52.9593	8.31565	128.51	16.7071	81.2778	10.9527	47.2319	10.4314
		HEAVYvsNEVER	54426	27.0165	12.1082	54.4667	8.25991	124.175	17.1762	77.2864	10.9796	46.888	10.533	6858	79.7754	13.6337	52.9593	8.31565	128.51	16.7071	81.2778	10.9527	47.2319	10.4314
		LIGHTvsNEVER	64826	31.1619	11.7947	54.2698	8.30064	123.931	16.9622	77.2108	10.8656	46.7199	10.4465	17258	63.5531	11.5367	53.1279	8.38949	124.982	16.38	78.5884	10.7528	46.3934	10.1585
LBC1921	EUR	CURDRINK	512	41.4062	40.4297	79.05	0.57	173.86	28.33	86.5	14.27	87.36	21.51	244	50.8197	38.9344	79.01	0.58	174.02	27.32	87.01	13.95	87.02	20.89
		HEAVYvsLIGHT	na	na	na	na	na	na	na	na	na	na	na	na	na	na	na	na	na	na	na	na	na	na
		HEAVYvsNEVER	na	na	na	na	na	na	na	na	na	na	na	na	na	na	na	na	na	na	na	na	na	na
		LIGHTvsNEVER	na	na	na	na	na	na	na	na	na	na	na	na	na	na	na	na	na	na	na	na	na	na
LBC1936	EUR	CURDRINK	996	50.9036	39.759	69.56	0.84	155.33	20.69	85.18	11.29	70.15	15.27	669	59.9402	37.8176	69.51	0.84	155.13	20.84	85.26	11.33	69.87	15.24
		HEAVYvsLIGHT	668	59.8802	37.7246	69.51	0.84	155.11	20.84	85.25	11.33	69.86	15.25	180	49.4444	35	69.56	0.84	156.77	22.03	85.18	11.62	71.59	15.04
		HEAVYvsNEVER	na	na	na	na	na	na	na	na	na	na	na	na	na	na	na	na	na	na	na	na	na	na
		LIGHTvsNEVER	na	na	na	na	na	na	na	na	na	na	na	na	na	na	na	na	na	na	na	na	na	na
Living Biobank (Chinese)	EAS	CURDRINK	1258	50.318	6.99523	36	11	114.9	16.5	69.3	11	45.4	10.6	163	76.0736	6.13497	33	11	118	15.2	71.5	10.2	46.4	10.3
		HEAVYvsLIGHT	na	na	na	na	na	na	na	na	na	na	na	na	na	na	na	na	na	na	na	na	na	na
		HEAVYvsNEVER	na	na	na	na	na	na	na	na	na	na	na	na	na	na	na	na	na	na	na	na	na	na
		LIGHTvsNEVER	883	51.9819	6.22877	35	11	114.4	16.6	69.1	11.1	45	10.6	156	75	6.41026	33	11	117.8	15.3	71.5	10.2	46.2	10.3
LL-CS	EUR	CURDRINK	10371	41.2978	12.3807	46.1687	11.0919	129.144	17.0744	76.133	10.0177	53.0095	11.8758	7667	50.0326	12.8342	46.9283	11.7457	130.051	17.1748	76.4678	10.0832	53.5811	11.9379
		HEAVYvsLIGHT	7651	49.9804	12.8219	46.9191	11.7459	130.004	17.1217	76.4327	10.0383	53.5696	11.9289	559	26.6547	16.8157	50.8229	10.7705	131.283	19.3887	77.2451	10.5955	54.0376	13.2434
		HEAVYvsNEVER	na	na	na	na	na	na	na	na	na	na	na	na	na	na	na	na	na	na	na	na	na	na
		LIGHTvsNEVER	na	na	na	na	na	na	na	na	na	na	na	na	na	na	na	na	na	na	na	na	na	na
LLFS	EUR	CURDRINK	4390	44.8747	43.5535	70.38	15.73	138.29	24.53	81.54	11.87	56.75	19.13	2283	53.3509	36.4871	66.4	13.78	136.6	22.98	82.5	11.92	54.1	16.97
		HEAVYvsLIGHT	2283	53.3509	36.4871	66.4	13.78	136.6	22.98	82.5	11.92	54.1	16.97	528	41.8561	33.9015	64.14	11.18	139.5	23.46	84.46	12.32	55.04	16.71
		HEAVYvsNEVER	1746	32.9897	45.7045	72.6	15.98	141.5	25.31	81.97	11.99	59.53	20.07	528	41.8561	33.9015	64.14	11.18	139.5	23.46	84.46	12.32	55.04	16.71
		LIGHTvsNEVER	2973	45.476	42.8187	70.84	15.89	138.44	24.37	81.49	11.72	56.96	19.17	1755	56.8091	37.265	67.07	14.41	135.72	22.77	81.91	11.73	53.81	17.04
LL-GSA	EUR	CURDRINK	32486	40.7745	11.134	42.8783	14.0753	125.886	16.7125	73.7826	10.2203	52.1039	11.2654	31400	41.551	11.0191	42.8921	14.1247	125.886	16.6866	73.7793	10.2238	52.1075	11.2328
		HEAVYvsLIGHT	31366	41.5673	11.0151	42.892	14.1253	125.882	16.6845	73.7763	10.2221	52.1067	11.233	2449	33.7281	12.2091	45.314	14.1932	127.794	17.6513	74.8375	10.603	52.9571	11.868
		HEAVYvsNEVER	na	na	na	na	na	na	na	na	na	na	na	na	na	na	na	na	na	na	na	na	na	na
		LIGHTvsNEVER	na	na	na	na	na	na	na	na	na	na	na	na	na	na	na	na	na	na	na	na	na	na
MESA	AFR	CURDRINK	1630	46.0736	50.184	62.27	10.05	139.02	24.75	79.46	11.78	59.57	18.44	814	52.0885	43.9803	61.1	10.13	136.38	24.54	79.19	11.76	57.18	17.95
		HEAVYvsLIGHT	na	na	na	na	na	na	na	na	na	na	na	na	na	na	na	na	na	na	na	na	na	na
		HEAVYvsNEVER	na	na	na	na	na	na	na	na	na	na	na	na	na	na	na	na	na	na	na	na	na	na
		LIGHTvsNEVER	733	46.5211	48.9768	62.1	9.83	139.18	24.91	79.71	12.04	59.47	18.5	447	60.6264	43.6242	60.52	9.79	136.47	24.64	80.24	12.25	56.23	17.16
MESA	EAS	CURDRINK	771	48.8975	29.1829	62.43	10.39	128.97	25.02	74.79	12.01	54.18	18.2	236	69.4915	26.6949	61.83	10.28	128.82	24.11	75.97	11.73	52.85	17.16
		HEAVYvsLIGHT	na	na	na	na	na	na	na	na	na	na	na	na	na	na	na	na	na	na	na	na	na	na
		HEAVYvsNEVER	na	na	na	na	na	na	na	na	na	na	na	na	na	na	na	na	na	na	na	na	na	na
		LIGHTvsNEVER	531	40.8663	30.5085	62.64	10.49	130.29	26.05	74.84	12.15	55.45	18.92	111	79.2793	25.2252	62.59	10.77	129.94	25.53	76.93	11.4	53	17.87
MESA	EUR	CURDRINK	2659	47.8751	33.396	62.72	10.14	128.18	23.21	73.36	11.26	54.83	17.38	1905	50.4987	31.3386	62.04	10.04	126.63	22.6	73.56	11.32	53.06	16.53
		HEAVYvsLIGHT	1369	57.0489	30.9715	62.35	9.96	126.97	22.54	74.18	11.35	52.79	16.42	252	50.7937	30.1587	60.44	9.55	126.34	21.32	75.25	11.84	51.09	14.97
		HEAVYvsNEVER	502	38.6454	36.8526	63.49	9.95	132.15	23.88	74.78	11.63	57.37	18	252	50.7937	30.1587	60.44	9.55	126.34	21.32	75.25	11.84	51.09	14.97
		LIGHTvsNEVER	1367	52.5969	33.4309	63.47	10	129.11	23.58	74.01	11.26	55.1	17.55	1117	58.4602	31.1549	62.78	10	127.11	22.81	73.94	11.23	53.17	16.72
MESA	HIS	CURDRINK	1497	48.163	33.4001	61.4	10.23	131.73	25.1	74.83	11.7	56.9	18.79	701	60.485	30.2425	59.58	9.87	129.27	23.21	75.72	11.63	53.55	16.68
		HEAVYvsLIGHT	na	na	na	na	na	na	na	na	na	na	na	na	na	na	na	na	na	na	na	na	na	na
		HEAVYvsNEVER	na	na	na	na	na	na	na	na	na	na	na	na	na	na	na	na	na	na	na	na	na	na
		LIGHTvsNEVER	767	42.2425	30.3781	61.46	10.34	131.48	24.97	74.27	11.52	57.21	18.69	373	73.1903	26.8097	59.57	9.82	129.34	22.43	76.39	11.24	52.95	15.83
METSIM	EUR	CURDRINK	10062	100	39.2566	58.1	7.1	144.2	19.8	91.2	11.1	53	14	7769	100	37.8556	57.5	7	144.1	19.7	91.6	11.1	52.5	13.6
		HEAVYvsLIGHT	7730	100	37.8655	57.5	7	144.1	19.7	91.6	11.1	52.5	13.6	1502	100	42.277	56.6	6.4	147.9	19.7	94	11	53.9	14.1
		HEAVYvsNEVER	na	na	na	na	na	na	na	na	na	na	na	na	na	na	na	na	na	na	na	na	na	na
		LIGHTvsNEVER	na	na	na	na	na	na	na	na	na	na	na	na	na	na	na	na	na	na	na	na	na	na
MONALISA	EUR	CURDRINK	1408	49.6449	30.6818	55.9	11.36	142.3	24.2	85.59	12.47	57.7	16.26	1089	56.1065	30.854	56.33	11.2	143.2	24.2	85.92	12.45	57.31	16.06
		HEAVYvsLIGHT	1065	55.1174	30.9859	56.23	11.22	142.8	24	85.74	12.38	57.1	15.92	359	56.2674	33.9833	58.78	9.96	148.3	23.8	87.98	12.1	60.37	16
		HEAVYvsNEVER	na	na	na	na	na	na	na	na	na	na	na	na	na	na	na	na	na	na	na	na	na	na
		LIGHTvsNEVER	na	na	na	na	na	na	na	na	na	na	na	na	na	na	na	na	na	na	na	na	na	na
MVP	AFR	CURDRINK	27406	85.8498	58.9834	61.8761	10.8247	142.143	19.8389	84.779	11.9041	57.3638	15.0725	12355	84.6216	54.1805	60.1646	11.0268	141.589	19.7022	85.0991	11.972	56.4891	14.6849
		HEAVYvsLIGHT	11305	83.7329	53.41	59.7265	10.9939	141.289	19.683	85.0465	11.9738	56.2421	14.5923	1566	86.7816	51.9796	60.1257	10.263	142.388	19.6947	86.2738	12.6712	56.1136	14.5455
		HEAVYvsNEVER	3319	80.4158	53.1485	60.9972	11.0049	141.64	19.8162	84.9799	12.0708	56.6601	14.9125	1578	86.692	51.9011	60.1603	10.2426	142.388	19.6583	86.2423	12.6592	56.1451	14.5194
		LIGHTvsNEVER	11475	81.9521	53.7168	59.9731	11.2138	141.078	19.7126	84.6917	11.7787	56.3859	14.6996	9739	83.2426	53.6195	59.6509	11.1148	141.106	19.6754	84.8468	11.8378	56.2595	14.5987
MVP	EUR	CURDRINK	196505	93.0282	52.6088	67.7189	11.3091	140.112	19.4117	81.1209	11.3233	58.9899	15.4623	104818	92.8476	47.8687	67.1656	11.7575	139.927	19.3404	81.3561	11.3459	58.5701	15.2908
		HEAVYvsLIGHT	99659	92.6188	47.4899	66.8954	11.7756	139.774	19.2886	81.3791	11.3263	58.3941	15.2269	18173	93.727	49.2214	67.2981	10.5123	142.422	19.4067	82.5811	11.535	59.8405	15.2528
		HEAVYvsNEVER	30285	92.6069	51.4644	68.6529	10.8872	141.631	19.4936	81.6964	11.522	59.9334	15.4321	18292	93.6858	49.2018	67.2856	10.5254	142.387	19.41	82.5705	11.5358	59.8164	15.2504
		LIGHTvsNEVER	93480	92.1876	48.1033	67.306	11.9714	139.354	19.2651	81.0171	11.2781	58.3358	15.2828	81538	92.3643	47.0995	66.8038	12.0124	139.187	19.2136	81.1109	11.2616	58.0752	15.2025
MVP	HIS	CURDRINK	13034	90.0798	48.9412	61.493	13.1245	138.373	19.3394	81.4574	11.2871	56.915	15.2381	6542	88.7802	42.6475	59.593	13.6077	137.484	19.2349	81.6045	11.3216	55.8786	15.0116
		HEAVYvsLIGHT	6204	88.3623	41.9407	59.1874	13.5896	137.253	19.1391	81.6199	11.2893	55.6334	14.9221	866	92.0323	44.1109	60.9503	12.3469	139.932	19.709	82.4595	11.5483	57.4722	15.5706
		HEAVYvsNEVER	1577	87.825	46.3538	61.8224	12.5817	138.808	19.4605	81.6211	11.4388	57.187	15.1086	868	91.9355	44.1244	60.9389	12.3932	139.866	19.7238	82.432	11.5367	57.4343	15.5895
		LIGHTvsNEVER	6048	87.2189	42.5595	59.3895	13.7079	136.895	19.0196	81.374	11.2538	55.5206	14.7646	5342	87.7761	41.6511	58.9013	13.758	136.83	19.0156	81.4887	11.2419	55.3412	14.7927
NEO	EUR	CURDRINK	5731	48.0544	31.0766	55.97	5.94	137.48	19.35	88.19	11.66	49.29	11.65	4402	53.612	29.532	56.16	5.89	137.8	19.31	88.17	11.76	49.62	11.51
		HEAVYvsLIGHT	4402	53.612	29.532	56.16	5.89	137.8	19.31	88.18	11.76	49.62	11.51	1619	48.2397	30.0185	56.69	5.75	138.47	19.53	88.59	11.68	48.88	11.68
		HEAVYvsNEVER	na	na	na	na	na	na	na	na	na	na	na	na	na	na	na	na	na	na	na	na	na	na
		LIGHTvsNEVER	na	na	na	na	na	na	na	na	na	na	na	na	na	na	na	na	na	na	na	na	na	na
NESDA	EUR	CURDRINK	2538	33.7273	14.736	42.2284	12.9905	136.268	19.8566	81.7763	11.2998	54.4919	12.9579	2133	35.6774	14.0647	42.0561	13.0085	136.369	20.1606	81.7922	11.3806	54.5769	13.1485
		HEAVYvsLIGHT	2123	35.7513	13.9896	42.0296	13.005	136.317	20.12	81.7575	11.3571	54.5596	13.146	358	32.9609	15.0838	44.7944	12.9955	140.723	22.2916	83.4095	11.8006	57.3134	14.9849
		HEAVYvsNEVER	na	na	na	na	na	na	na	na	na	na	na	na	na	na	na	na	na	na	na	na	na	na
		LIGHTvsNEVER	na	na	na	na	na	na	na	na	na	na	na	na	na	na	na	na	na	na	na	na	na	na
PROCARDIS CASE	EUR	CURDRINK	5054	74.2382	77.0875	62.18	7.36	148.07	21.17	88.22	11.51	59.85	16.36	2872	83.9136	76.2535	61.41	7.54	148.44	20.88	88.92	11.42	59.52	16.04
		HEAVYvsLIGHT	2371	85.5757	76.7187	61.52	7.48	148.88	21.04	89.2	11.42	59.68	16.22	534	79.4007	76.4045	60.92	7.2	151.27	20.85	90.34	11.46	60.92	15.96
		HEAVYvsNEVER	2245	62.0045	77.8174	62.8922	7.10708	148.768	21.4356	88.0385	11.5705	60.7298	16.6636	534	79.4007	76.4045	60.9232	7.20458	151.267	20.8506	90.3427	11.4585	60.9242	15.959
		LIGHTvsNEVER	3548	72.5197	77.5085	62.5676	7.33054	148.09	21.2958	88.122	11.4772	59.9677	16.5883	1837	87.3707	76.81	61.693	7.55253	148.184	21.0505	88.8696	11.3947	59.3144	16.2879
PROCARDIS CONT	EUR	CURDRINK	1456	65.9341	14.7665	57.5405	8.98978	138.199	20.3672	85.2081	10.8472	52.9911	14.5142	810	76.5432	17.1605	57.416	8.85893	138.937	20.6641	85.758	11.3058	53.179	14.0813
		HEAVYvsLIGHT	665	78.1955	18.1955	57.8977	8.42767	139.028	20.526	85.8602	11.3405	53.1677	13.8146	186	75.8065	18.2796	56.6667	8.59143	136.893	19.2542	85.6855	9.95309	51.207	13.6744
		HEAVYvsNEVER	587	70.6985	17.8876	55.402	9.2877	136.118	18.4513	85.3075	9.91979	50.81	13.5929	186	75.8065	18.2796	56.6667	8.59143	136.893	19.2542	85.6855	9.95309	51.207	13.6744
		LIGHTvsNEVER	880	74.2045	17.9545	56.7534	9.0718	137.989	19.7947	85.5653	11.0071	52.4239	13.7899	479	79.1232	18.1628	58.3758	8.32328	139.857	20.9599	85.928	11.8445	53.929	13.8078
PROSPER	EUR	CURDRINK	5187	48.2938	73.9734	75.34	3.35	165.69	23.26	91.04	12.45	74.64	18.45	2886	61.4692	70.4089	75.15	3.34	164.93	23.32	90.74	12.48	74.19	18.34
		HEAVYvsLIGHT	2882	61.4157	70.4025	75.16	3.34	164.93	23.33	90.73	12.48	74.2	18.33	667	67.4663	65.967	74.69	3.2	164.52	22.09	90.71	12.15	73.81	17.9
		HEAVYvsNEVER	na	na	na	na	na	na	na	na	na	na	na	na	na	na	na	na	na	na	na	na	na	na
		LIGHTvsNEVER	na	na	na	na	na	na	na	na	na	na	na	na	na	na	na	na	na	na	na	na	na	na
Ragama Health Study	SAS	CURDRINK	2473	45.2891	20.2184	52.53	7.8643	138.184	24.9115	81.4221	13.8027	56.6904	15.1069	738	91.4634	17.6152	52.09	7.68004	137.446	24.1818	81.502	14.1753	55.8094	13.8629
		HEAVYvsLIGHT	311	98.0707	16.3987	51.87	7.91845	139.489	24.9333	82.791	14.5406	56.6977	14.4659	107	98.1308	15.8879	52.63	8.37846	142.561	25.2326	83.7664	13.7296	58.7944	15.4161
		HEAVYvsNEVER	1611	22.3464	21.2291	52.51	8.00212	139.455	25.3176	81.9	13.5844	57.5071	15.7736	107	98.1308	15.8879	52.63	8.37846	142.561	25.2326	83.7664	13.7296	58.7944	15.4161
		LIGHTvsNEVER	1708	26.6393	21.0187	52.38	7.9448	139.072	25.2394	81.8284	13.7383	57.1983	15.5874	204	98.0392	16.6667	51.47	7.65732	137.877	24.6842	82.2794	14.9559	55.598	13.8541
REGARDS	AFR	CURDRINK	8894	39.105	63.3123	63.6166	9.20376	140.511	19.994	84.9406	11.4879	55.5715	14.4584	3809	46.4689	58.2043	62.4272	8.88088	139.561	20.0081	84.9802	11.4405	54.5807	14.1337
		HEAVYvsLIGHT	1541	63.4004	54.9643	62.0278	8.67753	139.431	20.0571	84.9883	11.2962	54.4422	13.8571	223	61.435	58.296	61.8969	8.35114	142.543	19.0328	85.3834	11.7345	57.1592	13.5638
		HEAVYvsNEVER	3216	25.1555	65.7649	64.4671	9.52177	141.08	19.9592	84.8504	11.5868	56.2295	14.7179	223	61.435	58.296	61.8969	8.35114	142.543	19.0328	85.3834	11.7345	57.1592	13.5638
		LIGHTvsNEVER	4311	35.0731	62.6769	63.8601	9.40322	140.339	20.0944	84.8446	11.4688	55.4944	14.5517	1318	63.7329	54.4006	62.0499	8.73421	138.904	20.1848	84.9215	11.2236	53.9825	13.8585
REGARDS	EUR	CURDRINK	1722	56.3879	47.7352	68.3798	10.3688	135.19	19.4764	80.0505	10.9971	55.14	14.7903	924	58.3333	46.4286	67.6084	10.5814	134.479	18.6284	80.3258	10.4556	54.1537	14.3528
		HEAVYvsLIGHT	487	68.5832	41.6838	67.4806	10.4713	132.916	17.3838	79.4908	10.4356	53.4251	13.2183	65	49.2308	36.9231	67.0758	10.4695	133.869	18.7773	80.2846	10.1342	53.5846	14.3172
		HEAVYvsNEVER	548	43.9781	50	69.8784	10.0566	136.012	20.0978	79.8914	11.2221	56.1204	15.1152	65	49.2308	36.9231	67.0758	10.4695	133.869	18.7773	80.2846	10.1342	53.5846	14.3172
		LIGHTvsNEVER	905	56.4641	47.4033	68.9945	10.2853	134.654	18.9632	79.6193	10.9634	55.0343	14.3165	422	71.564	42.4171	67.5437	10.4825	132.769	17.1782	79.3685	10.4876	53.4005	13.0589
SHEEP-Cases	EUR	CURDRINK	1142	71.1909	2.8021	59.17	7.16	132.01	20.25	79.71	10.15	52.31	16.03	798	78.5714	3.00752	58.55	7.15	131.03	19.44	79.83	10	51.2	15.26
		HEAVYvsLIGHT	793	78.5624	3.02648	58.55	7.16	131.03	19.41	79.83	10	51.2	15.25	216	84.2593	3.24074	57.55	7.3	131.95	19.34	80.74	10.4	51.21	14.31
		HEAVYvsNEVER	510	65.6863	2.7451	59.49	7.27	133.26	21.05	79.74	10.51	53.52	16.38	216	84.2593	3.24074	57.55	7.3	131.95	19.34	80.74	10.4	51.21	14.31
		LIGHTvsNEVER	871	68.1975	2.75545	59.6	7.08	131.88	20.47	79.33	10.07	52.55	16.4	577	76.4298	2.94627	58.93	7.07	130.68	19.44	79.49	9.83	51.19	15.6
SHEEP-Controls	EUR	CURDRINK	1494	68.2062	1.40562	59.81	7.11	140.57	21.41	83.79	10.69	56.78	16.47	1155	72.8139	1.64502	59.24	7.14	139.89	21.01	83.84	10.7	56.05	15.91
		HEAVYvsLIGHT	1153	72.7667	1.64788	59.24	7.14	139.87	21.02	83.83	10.7	56.04	15.91	329	77.8116	2.12766	58.48	7.22	140.22	20.6	84.62	11.48	55.6	14.9
		HEAVYvsNEVER	643	64.6967	1.39969	60.26	7.11	141.75	21.47	84.06	10.79	57.67	16.67	329	77.8116	2.12766	58.48	7.22	140.22	20.6	84.62	11.48	55.6	14.9
		LIGHTvsNEVER	1138	65.29	1.23023	60.25	7.02	140.72	21.55	83.5	10.25	57.21	16.9	824	70.7524	1.45631	59.54	7.08	139.72	21.2	83.51	10.36	56.21	16.31
SHIP-START	EUR	CURDRINK	3772	48.9661	26.9353	49.178	16.211	140.629	24.195	86.402	12.6	54.223	15.831	3144	51.1132	23.9822	47.982	15.82	139.407	23.534	86.148	12.377	53.259	15.116
		HEAVYvsLIGHT	3137	51.1317	23.9401	47.969	15.828	139.364	23.509	86.125	12.355	53.238	15.117	633	65.8768	19.9052	45.081	13.357	140.876	22.102	88.271	12.367	52.605	13.382
		HEAVYvsNEVER	na	na	na	na	na	na	na	na	na	na	na	na	na	na	na	na	na	na	na	na	na	na
		LIGHTvsNEVER	na	na	na	na	na	na	na	na	na	na	na	na	na	na	na	na	na	na	na	na	na	na
SHIP-TREND_B1	EUR	CURDRINK	975	43.8974	27.7949	50.142	13.722	129.545	19.647	79.952	11.225	49.592	12.705	866	44.9192	26.7898	49.782	13.542	129.474	19.592	79.965	11.042	49.509	12.834
		HEAVYvsLIGHT	863	44.9594	26.883	49.803	13.559	129.484	19.611	79.96	11.049	49.524	12.847	92	68.4783	20.6522	48.359	11.383	133.312	21.611	82.254	11.762	51.058	13.623
		HEAVYvsNEVER	na	na	na	na	na	na	na	na	na	na	na	na	na	na	na	na	na	na	na	na	na	na
		LIGHTvsNEVER	na	na	na	na	na	na	na	na	na	na	na	na	na	na	na	na	na	na	na	na	na	na
SHIP-TREND_B2	EUR	CURDRINK	3087	49.919	38.16	52.528	15.846	135.899	22.298	81.809	11.515	54.089	15.014	2500	52.16	36.24	51.697	15.754	135.473	22.038	81.91	11.583	53.564	14.597
		HEAVYvsLIGHT	2489	52.1896	36.2395	51.735	15.757	135.449	22.039	81.897	11.568	53.552	14.612	279	75.6272	35.1254	51.731	13.798	139.787	21.862	84.493	12.067	55.294	14.52
		HEAVYvsNEVER	na	na	na	na	na	na	na	na	na	na	na	na	na	na	na	na	na	na	na	na	na	na
		LIGHTvsNEVER	na	na	na	na	na	na	na	na	na	na	na	na	na	na	na	na	na	na	na	na	na	na
SINDI	SAS	CURDRINK	2533	51.0462	37.1891	58	10	141.1	22.5	81.1	11	60	17.2	328	92.378	35.3659	57	10	140.6	20.5	84.6	10.8	56	15.2
		HEAVYvsLIGHT	na	na	na	na	na	na	na	na	na	na	na	na	na	na	na	na	na	na	na	na	na	na
		HEAVYvsNEVER	na	na	na	na	na	na	na	na	na	na	na	na	na	na	na	na	na	na	na	na	na	na
		LIGHTvsNEVER	na	na	na	na	na	na	na	na	na	na	na	na	na	na	na	na	na	na	na	na	na	na
Singapore Chinese Eye Study (SCES-610)	EAS	CURDRINK	1884	51.1677	51.7516	58	10	143.5	21.7	83.2	10.7	60.3	16.4	223	86.0987	40.8072	57	9	142.9	20.5	85.2	11	57.7	15.3
		HEAVYvsLIGHT	na	na	na	na	na	na	na	na	na	na	na	na	na	na	na	na	na	na	na	na	na	na
		HEAVYvsNEVER	na	na	na	na	na	na	na	na	na	na	na	na	na	na	na	na	na	na	na	na	na	na
		LIGHTvsNEVER	na	na	na	na	na	na	na	na	na	na	na	na	na	na	na	na	na	na	na	na	na	na
Singapore Chinese Eye Study (SCES-omni)	EAS	CURDRINK	615	51.2195	37.561	60	10	141.9	21.7	80.5	10.8	61.3	16.3	66	86.3636	31.8182	57	9	137.8	18.8	81.2	10.9	56.6	13.1
		HEAVYvsLIGHT	na	na	na	na	na	na	na	na	na	na	na	na	na	na	na	na	na	na	na	na	na	na
		HEAVYvsNEVER	na	na	na	na	na	na	na	na	na	na	na	na	na	na	na	na	na	na	na	na	na	na
		LIGHTvsNEVER	na	na	na	na	na	na	na	na	na	na	na	na	na	na	na	na	na	na	na	na	na	na
Singapore Prospective Study Program (SP2-1M)	EAS	CURDRINK	942	63.5881	12.1019	47	10	130.8	20.3	79.5	12.1	51.3	12.9	132	84.8485	12.8788	47	10	131.8	18	81.5	11.4	50.3	11.9
		HEAVYvsLIGHT	na	na	na	na	na	na	na	na	na	na	na	na	na	na	na	na	na	na	na	na	na	na
		HEAVYvsNEVER	na	na	na	na	na	na	na	na	na	na	na	na	na	na	na	na	na	na	na	na	na	na
		LIGHTvsNEVER	762	61.9423	12.336	47	10	130.8	20.5	79.5	12	51.4	13	107	87.8505	13.0841	47	10	131.8	18.5	81.8	11.8	50	12.1
Singapore Prospective Study Program (SP2-610)	EAS	CURDRINK	1138	23.3743	14.587	49	11	130.3	23.3	76.1	11.5	54.2	16	72	66.6667	13.8889	48	12	135.5	23.5	80.7	12.2	54.9	15.1
		HEAVYvsLIGHT	na	na	na	na	na	na	na	na	na	na	na	na	na	na	na	na	na	na	na	na	na	na
		HEAVYvsNEVER	na	na	na	na	na	na	na	na	na	na	na	na	na	na	na	na	na	na	na	na	na	na
		LIGHTvsNEVER	905	21.8785	14.6961	49	11	130.8	23.4	76.3	11.6	54.5	16.1	61	65.5738	11.4754	48	12	134.6	24.2	79.9	12.5	54.7	15.4
UKB	AFR	CURDRINK	5976	60.425	34.5549	52.4021	8.11835	143.414	21.5195	87.9953	12.3278	55.4185	13.7956	4739	58.8099	34.5643	52.3717	8.05605	143.449	21.5004	88.2354	12.3459	55.2135	13.7108
		HEAVYvsLIGHT	4739	58.8099	34.5643	52.3717	8.05605	143.449	21.5004	88.2354	12.3459	55.2135	13.7108	612	59.8039	28.5948	51.6166	7.42881	143.419	22.2286	89.0833	12.7142	54.3358	13.7384
		HEAVYvsNEVER	1541	67.4238	31.6677	52.0932	8.06762	143.343	21.9848	87.9698	12.4282	55.3735	14.0983	612	59.8039	28.5948	51.6166	7.42881	143.419	22.2286	89.0833	12.7142	54.3358	13.7384
		LIGHTvsNEVER	5056	61.1946	35.1266	52.4675	8.19592	143.424	21.4728	87.9492	12.2722	55.4748	13.8158	4127	58.6625	35.4495	52.4829	8.13928	143.453	21.3931	88.1096	12.2869	55.3437	13.7036
UKB	EAS	CURDRINK	2460	70.7724	17.7642	52.2115	7.83774	135.337	21.205	83.6348	11.9543	51.7024	13.3574	1833	68.3033	15.9847	51.9718	7.7717	134.927	20.8498	83.6339	11.8327	51.2935	13.0176
		HEAVYvsLIGHT	1833	68.3033	15.9847	51.9718	7.7717	134.927	20.8498	83.6339	11.8327	51.2935	13.0176	248	71.371	13.7097	51.8949	7.7747	135.72	21.3366	84.3871	11.8184	51.3327	13.4014
		HEAVYvsNEVER	762	80.1837	18.6352	52.4502	7.86174	136.197	21.9503	83.7448	12.2157	52.4521	13.7839	248	71.371	13.7097	51.8949	7.7747	135.72	21.3366	84.3871	11.8184	51.3327	13.4014
		LIGHTvsNEVER	2099	71.8914	17.4845	52.1621	7.80823	135.201	21.1549	83.4962	11.9729	51.7049	13.2257	1585	67.8233	16.3407	51.9835	7.77347	134.803	20.7767	83.5161	11.8343	51.2874	12.9608
UKB	EUR	CURDRINK	329755	58.8294	25.1699	56.8224	8.00746	141.482	20.6099	84.486	11.2053	56.9951	14.1375	308263	57.9421	24.5608	56.7207	8.00821	141.461	20.5589	84.5293	11.1906	56.9309	14.0756
		HEAVYvsLIGHT	308263	57.9421	24.5608	56.7207	8.00821	141.461	20.5589	84.5293	11.1906	56.9309	14.0756	119893	61.9577	23.2074	56.4615	7.85195	142.156	20.7654	85.1281	11.2472	57.0275	14.1299
		HEAVYvsNEVER	129939	63.5552	23.9674	56.6729	7.88163	142.207	20.8219	85.0297	11.2617	57.1773	14.2242	119893	61.9577	23.2074	56.4615	7.85195	142.156	20.7654	85.1281	11.2472	57.0275	14.1299
		LIGHTvsNEVER	198416	56.7651	25.8079	57.0024	8.10236	141.11	20.4729	84.1334	11.1497	56.9754	14.1087	188370	55.3862	25.4223	56.8857	8.10183	141.018	20.4141	84.1482	11.1377	56.8693	14.0407
UKB	HIS	CURDRINK	925	68.2162	16.8649	52.8048	8.27776	133.914	19.4897	81.5184	10.9335	52.3957	12.9169	833	66.6267	16.4466	52.828	8.29744	134.155	19.4385	81.7065	10.9243	52.449	12.8114
		HEAVYvsLIGHT	833	66.6267	16.4466	52.828	8.29744	134.155	19.4385	81.7065	10.9243	52.449	12.8114	231	68.8312	16.4502	53.1245	7.87461	135.483	19.9472	82.7662	11.0039	52.7165	13.2382
		HEAVYvsNEVER	295	73.5593	17.6271	52.8013	7.89326	134.914	20.1477	82.2932	11.0169	52.6203	13.6281	231	68.8312	16.4502	53.1245	7.87461	135.483	19.9472	82.7662	11.0039	52.7165	13.2382
		LIGHTvsNEVER	666	68.1682	16.967	52.6112	8.407	133.571	19.3821	81.2312	10.8792	52.3393	12.8914	602	65.7807	16.4452	52.7147	8.45667	133.646	19.2323	81.2998	10.8753	52.3463	12.6536
UKB	SAS	CURDRINK	7634	48.2447	30.469	53.4991	8.51192	139.449	21.1266	85.428	11.2832	54.0205	14.2693	4124	39.1125	31.3531	54.0014	8.54752	140.037	21.0897	86.0129	11.2944	54.0239	14.078
		HEAVYvsLIGHT	4124	39.1125	31.3531	54.0014	8.54752	140.037	21.0897	86.0129	11.2944	54.0239	14.078	627	34.6093	32.3764	54.1997	8.42962	143.656	20.7751	88.453	11.2368	55.2026	14.025
		HEAVYvsNEVER	3705	58.8124	29.3657	52.928	8.36743	139.573	21.1492	85.4077	11.2482	54.1657	14.4705	627	34.6093	32.3764	54.1997	8.42962	143.656	20.7751	88.453	11.2368	55.2026	14.025
		LIGHTvsNEVER	6575	51.0722	30.038	53.3549	8.48213	139.085	21.1065	85.2065	11.21	53.879	14.3018	3497	39.9199	31.1696	53.966	8.56906	139.388	21.083	85.5754	11.2505	53.8126	14.0791
WGHS	EUR	CURDRINK	22915	0	12.9915	54.1976	7.11762	125.592	16.4505	78.0102	10.6893	47.5822	10.3654	12981	0	11.6324	54.0408	6.97628	124.668	15.9847	77.6152	10.497	47.0528	10.0722
		HEAVYvsLIGHT	12893	0	11.5644	54.0374	6.97817	124.634	15.9777	77.5935	10.4867	47.0408	10.0807	1839	0	13.1049	55.1898	7.28768	125.824	16.329	78.3877	10.5221	47.4361	10.4355
		HEAVYvsNEVER	na	na	na	na	na	na	na	na	na	na	na	na	na	na	na	na	na	na	na	na	na	na
		LIGHTvsNEVER	na	na	na	na	na	na	na	na	na	na	na	na	na	na	na	na	na	na	na	na	na	na
WHI-GARNET	EUR	CURDRINK	3769	0	26.0281	65.58	6.9	134.34	20.36	78.27	10.76	56.07	15.72	1215	0	20.9053	65.6	6.73	133.13	20.05	77.73	10.31	55.4	15.61
		HEAVYvsLIGHT	1211	0	20.9744	65.61	6.73	133.14	20.06	77.72	10.31	55.42	15.62	426	0	25.3521	66.46	6.73	135.66	20.39	78.8	10.71	56.86	15.85
		HEAVYvsNEVER	2961	0	27.9973	65.67	6.94	135	20.48	78.55	10.91	56.45	15.78	426	0	25.3521	66.46	6.73	135.66	20.39	78.8	10.71	56.86	15.85
		LIGHTvsNEVER	3320	0	26.1145	65.45	6.91	134.16	20.36	78.18	10.76	55.97	15.71	785	0	18.5987	65.14	6.69	131.77	19.75	77.13	10.05	54.64	15.45
WHI-SHARE	AFR	CURDRINK	7798	0	45.9862	61.56	7.02	138.95	21.15	82.74	11.32	56.21	15.9	1326	0	41.1765	60.94	6.82	137.25	20.61	82.48	11.13	54.77	15.08
		HEAVYvsLIGHT	1319	0	41.2434	60.98	6.82	137.24	20.6	82.45	11.1	54.79	15.06	308	0	45.1299	61.42	6.64	138.45	19.99	82.84	10.88	55.61	14.37
		HEAVYvsNEVER	6717	0	46.9704	61.66	7.04	139.27	21.17	82.81	11.33	56.46	15.97	308	0	45.1299	61.42	6.64	138.45	19.99	82.84	10.88	55.61	14.37
		LIGHTvsNEVER	7420	0	46.1051	61.56	7.04	138.98	21.18	82.74	11.33	56.24	15.96	1011	0	40.0593	60.85	6.87	136.87	20.77	82.33	11.17	54.55	15.27
WHI-SHARE	HIS	CURDRINK	3163	0	20.0126	60.3	6.71	128.68	19.93	77.05	10.84	51.63	14.4	718	0	14.0669	59.77	6.32	124.81	18.28	76.04	10.03	48.76	13.18
		HEAVYvsLIGHT	717	0	14.0865	59.78	6.32	124.83	18.29	76.06	10.03	48.78	13.19	161	0	12.4224	60.16	6.48	125.16	16.88	76.7	10.02	48.46	11.94
		HEAVYvsNEVER	2585	0	21.1219	60.43	6.78	129.52	20.06	77.29	10.98	52.23	14.51	161	0	12.4224	60.16	6.48	125.16	16.88	76.7	10.02	48.46	11.94
		LIGHTvsNEVER	2980	0	20.3691	60.3	6.72	128.86	20.04	77.06	10.87	51.81	14.5	556	0	14.5683	59.67	6.28	124.73	18.69	75.87	10.03	48.87	13.54
WHI-WHIMS	EUR	CURDRINK	5169	0	24.4728	67.92	5.95	133.86	20.42	77.35	10.52	56.51	15.73	2015	0	21.737	67.79	5.88	132.86	20.08	77.24	10.43	55.62	15.23
		HEAVYvsLIGHT	2012	0	21.7197	67.79	5.88	132.86	20.09	77.25	10.42	55.61	15.23	706	0	19.2635	67.62	5.8	132.29	19.33	76.9	10.09	55.39	14.57
		HEAVYvsNEVER	3833	0	24.9413	67.91	5.97	134.1	20.38	77.33	10.48	56.77	15.76	706	0	19.2635	67.62	5.8	132.29	19.33	76.9	10.09	55.39	14.57
		LIGHTvsNEVER	4433	0	25.2876	67.95	5.98	134.11	20.57	77.43	10.58	56.68	15.89	1306	0	23.0475	67.89	5.93	133.16	20.49	77.43	10.59	55.73	15.58
YFS	EUR	CURDRINK	2066	45.1113	2.71055	31.69	4.989	117.1	13.63	71.03	11.17	46.07	9.599	1475	50.5763	2.77966	31.91	5.03	117.8	13.71	71.5	11.21	46.29	9.708
		HEAVYvsLIGHT	1468	50.545	2.79292	31.92	5.037	117.8	13.7	71.49	11.21	46.29	9.687	335	53.1343	2.38806	31.93	5.156	119.1	14.14	72.39	11.98	46.73	9.713
		HEAVYvsNEVER	651	38.5561	2.76498	31.77	5	116.9	13.83	70.91	11.36	45.99	9.629	335	53.1343	2.38806	31.93	5.156	119.1	14.14	72.39	11.98	46.73	9.713
		LIGHTvsNEVER	1449	43.9614	2.96756	31.85	4.967	116.8	13.5	70.81	10.88	45.95	9.644	1133	49.7793	2.91262	31.92	5.004	117.4	13.54	71.22	10.97	46.16	9.679
