# Supplementary material for: Discovery of gene-alcohol interaction loci influencing blood pressure in 1.1 million individuals from multiple populations
Source: Research Square preprint supplement (doi:10.21203/rs.3.rs-9283196/v1), 2026-04-03
Supplement: Supplementary file 17 [file d5088cb03ddfb1beda166718.xlsx]

## Sheet: ST9. Functional
Supplementary Table 9. Functional annotation of 46 GxAlc interaction loci. Shown are non-synonymous variants that were identified by FUMA SNP2GENE (Annovar)
uniqID	gene	annot	dist	exonic_func	exon	symbol	chr	pos
4:100239319:C:T	ENSG00000196616	exonic	0	nonsynonymous SNV	exon3	ADH1B	4	100239319
5:131676320:C:T	ENSG00000197208	exonic	0	nonsynonymous SNV	exon9	SLC22A4	5	131676320
8:9414159:C:G	ENSG00000173273	exonic	0	nonsynonymous SNV	exon1	TNKS	8	9414159
12:112241766:A:G	ENSG00000111275	exonic	0	nonsynonymous SNV	exon11	ALDH2	12	112241766
