# Supplementary material for: Discovery of gene-alcohol interaction loci influencing blood pressure in 1.1 million individuals from multiple populations
Source: Research Square preprint supplement (doi:10.21203/rs.3.rs-9283196/v1), 2026-04-03
Supplement: Supplementary file 19 [file ea5d58dc3d20267d98435f21.xlsx]

## Sheet: ST2. Genotyping, imputation etc
Supplementary Table 2. Genotyping, imputation, and analysis software
Study Name	Population	Country	Study design*	# of Principal Components (PCs)	Other Covariates	Genotyping platform	Imputation software	Imputation: reference panel	Analysis Software
AGES_gsa	EUR	Iceland	UN	5	na	Illumina Infinium Global Screening Array	Minimac3	HRC	GEM
AGES_hu370CNV	EUR	Iceland	UN	5	na	Illumina Hu370CNV	Minimac3	HRC	GEM
ARIC	AFR	USA	UN	1-10	field center	Affymetrix Genome-Wide Human SNP Array 6.0	BioData Catalyst TOPMed Imputation Server	TOPMed R2	GEM
ARIC	EUR	USA	UN	1-10	field center	Affymetrix Genome-Wide Human SNP Array 6.0	BioData Catalyst TOPMed Imputation Server	TOPMed R2	GEM
ASCOT-SC	EUR	Scandinavia	UN	10	na	Illumina Human Omni Exome Express v8.1	Michigan Imputation Cloud Server	1000 Genomes Phase 3 V5	GEM
ASCOT-UK	EUR	UK / Ireland	UN	10	na	Illumina HumanCNV 370	1000 Genomes Phase 3 v5	1000 Genomes Phase 3 v5	GEM
ASPREE	EUR	Australia / US	UN	10	Country	Axiom 2.0 Precision Medicine Diversity Research Array	Michigan Imputation Server	Haplotype Reference Consortium panel, European samples	GEM
ASPS	EUR	Austria	UN	1 to 3	na	Illumina Human610-Quad BeadChip	TOPMed Imputation Server	TOPMed R2	GEM
ASPS-Fam	EUR	Austria	FB	1 to 2	na	Affymetrix Genome-Wide Human SNP Array 6.0	TOPMed Imputation Server	TOPMed R2	MMAP, GEM
AUGUR	EUR	Germany	UN	10	indicator (Augur-1 vs Augur2)	Illumina Infinium® Global Screening Array 24	Minimac3	1000G p3 v5	MMAP
AWI-GEN	AFR	South Africa /Burkina Faso /Ghana/Kenya	UN	5	field center	h3array	imputation.sanger.ac.uk platform EAGLE2	African Genome Resource	LinGxEScanR
Baependi Heart Study	BRA	Brazil	FB	1 to 4	none	Affymetrix	Minimac	TOPMed	MMAP, GEM
BBJ	EAS	Japan	CC	10	na	(1) Infinium Omni Express Exome v.1.0, (2) Infinium Omni Express Exome v.1.2 and (3) a combination of Illumina Infinium Omni Express and Human Exome	TOPMed Imputation Server	TOPMed R2	GEM
Beijing Eye Study (BES-610)	EAS	China	UN	na	na	Illumina Human610-Quad Beadchips	TOPMed Imputation Server (Minimac 4 - 1.0.2)	TOPMed R2	GEM
Beijing Eye Study (BES-omni)	EAS	China	UN	na	na	Illumina OmniExpress	TOPMed Imputation Server (Minimac 4 - 1.0.2)	TOPMed R2	GEM
BHRC	HIS	USA	UN	5	na	Illumina MEGAex	minimac4	TOPMed R2	MMAP
BHS	AFR	USA	UN	10	none	Illumina Human610 Genotyping BeadChip	Minimac4	TOPMed R2	MMAP, GEM
BHS	EUR	US	UN	10	na	Illumina Human610 Genotyping BeadChip	Minimac4	TOPMed R2	MMAP, GEM
BioMe	AFR	USA	UN	10	none	Regeneron Infinium Global Screening Array	Michigan Imputation server pipeline (minimac)	TOPMed Freeze5	GEM
BioMe	HIS	USA	UN	10	na	Regeneron Infinium Global Screening Array	Michigan Imputation server pipeline (minimac)	TOPMed freeze5	GEM
BRIGHT	EUR	UK	UN	10	na	Affy metrix GeneChip 500k array	Michigan Imputation server	HRC	GEM
CAGE-KING	EAS	Japan	UN	10	na	Illumina OmniExpress-12	Minimac3	1000G Phase 3 all ancestries	GEM
CARDIA	AFR	USA	UN	4	field center	Affymetrix 6.0 array	Michigan Imputation server	TOPMed	LinGxEScanR
CARDIA	EUR	USA	UN	2	field center	Affymetrix 6.0 array	Michigan Imputation server	TOPMed	LinGxEScanR
CHS	AFR	USA	UN	2	field center	Illumina HumanOmni1-Quad_v1 BeadChip system	Minimac 4 (prephasing Eagle v2.4)	TOPMed Freeze5	LinGxEScanR
CHS	EUR	USA	UN	6	field center	Illumina 370CNV chip	minimac 4 (prephasing Eagle v2.4)	TOPMed Freeze5	LinGxEScanR
Cilento	EUR	Italy	FB	0	chip, year_measure	Illumina 370K and Illumina OmniExpress	TOPMed Imputation Server	TOPMed	MMAP
CoLaus	EUR	Switzerland	UN	10	na	Affymetrix 500K SNP	Minimac3	HRC version r1.1	LinGxEScanR
CROATIA-Korcula	EUR	Croatia	FB	10	na	HumanOmniExpressExome8v1	Minimac4	TOPMed	MMAP/GEM
CROATIA-Vis	EUR	Croatia	FB	10	na	HumanOmniExpressExome8v1	Minimac4	TOPMed	MMAP, GEM
CRONICAS	HIS	Peru	longitudinal study	10	na	MEG chip, GDA chip	Michingan Imputation Server (Minimac3)	TOPMed	GEM
DHS	EUR	USA	FB	10	Diabetes status	Affymetrix 5.0	Minimac4	TOPMed R2	MMAP
DHS-AA	AFR	USA	UN	10	none	Illumina Omni5	Minimac4	TOPMed R2	MMAP
DIACORE	EUR	Germany	UN	10	na	Axiom UK Biobank Array	minimac	1000G p3 v5	MMAP
DR's EXTRA	EUR	Finland	UN	PC1	na	Cardio-Metabo_Chip_11395247_A	MaCH/minimac	1000G Phase 1 Integrated Release Version 3 Haplotypes (2010-11 data freeze, 2012-03-14 haplotypes) on 1,092 individuals of all ethnic backgrounds and excludes monomorphic and singleton sites	LinGxEScanR
ELISABET	EUR	France	UN	4	field center	CNG	Minimac 4	TOPMed	LinGxEScanR
Ely	EUR	UK	UN	10	na	Illumina HumanCoreExome-24	Sanger imputation server	HRC 1.1 + UK10Kplus1KGp3 combined	GEM
EPIC-Norfolk	EUR	UK	UN	10	na	Affymetrix Axiom UKBiobank	TOPMed imputation server	TOPMed (R2)	GEM
EstBB	EUR	Estonia	FB	10	na	Illumina GSA	Beagle 5.4	Estonian population specific reference	MMAP
EXCEED	EUR	UK	UN	10	na	Affymetrix Axiom UKBiobank	Michigan Imputation Server	HRC	MMAP, GEM
Fenland	EUR	UK	UN	10	na	Affymetrix Axiom UKBiobank	TOPMed imputation server	TOPMed R2	GEM v1.4.3
FHS	EUR	US	FB	3	cohort	Affymetrix Nsp, Sty and 50K gene centric	https://imputation.biodatacatalyst.nhlbi.nih.gov	TOPMed R2	MMAP
FUSION_CASES	EUR	Finland	CC	8	na	Illumina HumanHap300 v1.1	TOPMed Imputation Server	TOPMed R2	GEM
FUSION_CNTRLS	EUR	Finland	CC	8	na	Illumina HumanHap300 v1.1	TOPMed Imputation Server	TOPMed R2	GEM
Generation Scotland	EUR	Scotland	FB	10	na	HumanOmniExpressExome8v1	Minimac4	TOPMed	MMAP, GEM
GENOA	AFR	USA	FB	10	na	Affymetrix Genome-Wide Human SNP Array 6.0 or the Illumina Human 1M-Duo BeadChip	TOPMed Imputation server	TOPMed R2	MMAP, GEM
GENOA	EUR	USA	FB	10	na	Affymetrix Genome-Wide Human SNP Array 6.0, Illumina Human 1M-Duo 660-Quad, or Illumina Human 1M-Duo 610-Quad BeadChips	TOPMed Imputation server	TOPMed R2	MMAP, GEM
GenSalt	EAS	China	UN	10	field center	Whole genome sequencing using Illumina	N/A	N/A	MMAP, GEM
HCHS/SOL	HIS	USA	cohort with some relateness	10	field center	Illumina Expanded Multi-Ethnic Genotyping Array (MEGA) 15063755 B2 MEGA array	TOPMed Imputation Server	TOPMed	MMAP
HCS (Hunter Community Study)	EUR	Australia	UN	6	na	Affymetrix Axiom Kaiser array	Michigan-imputationserver-1.6.6 minimac4-1.0.2	TOPMed R2	LinGxEScanR
HRS	AFR	USA	UN	10	none	Illumina Omni2.5 Beadchip	Minimac4	TOPMed R2	GEM
HRS	EUR	USA	UN	10	na	Illumina Omni2.5 Beadchip	minimac 4	TOPMed R2	GEM
HTO	EUR	UK	FB	0	na	Illumina 660W-Quad	Minimac4 on TOPMed Imputation server	TOPMed	MMAP, GEM
HUFS	AFR	USA	FB	10	none	Affymetrix Genome-Wide Human SNP Array 6.0	minimac4-1.0.2	TOPMed (mixed populations)	MMAP, GEM
HyperGEN	AFR	USA	FB	10	none	TOPMed WGS	N/A	N/A	MMAP, GEM
HyperGEN	EUR	USA	FB	0	na	TOPMed Imputation	McCarthy Group Tools		MMAP, GEM
INGI - Carlantino	EUR	Italy	Population-Based	10	na	Illumina 370K	Shapeit/Inpute	1000 Genomes release 20130502 Plus WGS data	MMAP
INGI - Val Borbera	EUR	Italy	Population-Based	10	na	Illumina 370K, Illumina 700K	Shapeit/Inpute	1000 Genomes release 20130502 Plus WGS data	MMAP
INGI-FVG (INGI Friuli Venezia Giulia)	EUR	Italy	Population-Based	10	na	Illumina 370K+ OmniExpress	Shapeit/Inpute	1000 Genomes release 20130502 Plus WGS data	MMAP
IRASFS	AFR	USA	FB	1	none	MEGA_Consortium_15063755_B2	impute_v2.3.2_x86_64_static	1000 Genomes + AGVP	MMAP, GEM
IRASFS	HIS	USA	FB	3	field center	Illumina OmniExpress + 1S	Impute2	1000G Phase 3	MMAP
JHS	AFR	USA	FB, UN	10	field center	Full TOPMed sequence, Freeze 8	N/A	N/A	MMAP, GEM
JUPITER	EUR	US	UN	10	na	Omni 1M Quad platform	TOPMed Imputation server	TOPMed	GEM
JUPITER	EUR	US	UN	10	na	Omni 1M Quad platform	TOPMed Imputation server	TOPMed	GEM
KoGES	EAS	South Korea	UN	10	field center	KoreanChip (https://www.nature.com/articles/s41598-018-37832-9#Sec11)	IMPUTE4	1000G Phase 3 data and Korean reference genome	GEM
LBC1921	EUR	Scotland	UN	4	na	Illumina 610-Quadv1	Minimac4	TopMed freeze 8	LinGxEScanR
LBC1936	EUR	Scotland	UN	4	na	Illumina 610-Quadv1	Minimac4	TopMed freeze 8	LinGxEScanR
Living Biobank (Chinese)	EAS	Singapore	UN	na	MEC	Illumina OmniExpress	TOPMed Imputation Server (Minimac 4 - 1.0.2)	TOPMed R2	GEM
Living Biobank (Malay)	EAS	Singapore	UN	2	na	Illumina OmniExpress	TOPMed Imputation Server (Minimac 4 - 1.0.2)	TOPMed R2	GEM
LL-CS	EUR	The Netherlands	UN	10	na	Illumina Cyto SNP12 v2	Sanger server	HRC	MMAP
LLFS	EUR	USA / Denmark	FB	PC1	field center	Illumina Omni 2.5	TOPMed Imputation server (phased with Eagle v2.4, imputed with minimac4 v1.3.3)	TOPMed	MMAP
LL-GSA	EUR	The Netherlands	UN	10	na	Illumina Global Screen Array	Sanger server	HRC	MMAP
MESA	AFR	USA	UN	3	field center	Affymetrix 6.0	Minimac4/TOPMed Imputation Server	TOPMed R2	GEM
MESA	EAS	USA	UN	3	field center	Affymetrix 6.0	Minimac4/TOPMed Imputation Server	TOPMed R2	GEM
MESA	EUR	USA	UN	3	field center	Affymetrix 6.0	Minimac4/TOPMed Imputation Server	TOPMed R2	GEM
MESA	HIS	USA	UN	3	field center	Affymetrix 6.0	Minimac4/TOPMed Imputation Server	TOPMed R2	GEM
METSIM	EUR	Finland	UN and FB-like	8	na	Illumina HumanOmniExpress 12v1	TOPMed Imputation Server	TOPMed R2	MMAP, GEM
MONALISA	EUR	France	UN	2	na	CNG	Minimac 4	TOPMed	LinGxEScanR
MVP	AFR	USA	UN	10	days	Affymetrix	Minimac3	TOPMed	GEM
MVP	EUR	USA	UN	10	DAYS	Affymetrix	Minimac3	TOPMed	GEM
MVP	HIS	USA	UN	10	DAYS	Affymetrix	Minimac3	TOPMed	GEM
NEO	EUR	Netherlands	Population-Based	4	na	Illimuni HumanCoreExome-24v1_A Beadchip	Michigan server	TOPMed	GEM
NESDA	EUR	Netherlands	UN	3	na	Perlegen-Affymetrix 5.0; Affymetrix 6.0 907K	Minimac	1000Genomes global panel phase 1 release v3	LinGxEScanR
PROCARDIS	EUR	UK, Sweden, Germany, Italy	CC	3	na	Illumina 1M, Illumina 610K	Minimac	HRC	MMAP
PROSPER	EUR	UK/Ireland/Netherlands	Randomized Control Trial	4	na	Illumina	Michigan Server	TOPMed	GEM
Ragama Health Study	SAS	Sri Lanka	UN	10	na	illumina 550K / Omni2.5M	SHAPEIT/minimac3	1000G Phase 3 - all ancestry	LinGxEScanR
REGARDS	AFR	USA	CC	1	none		BioData Catalyst	TOPMed	GEM
REGARDS	EUR	US	CC	1	na		BioData CATALYST	TOPMed	GEM
SHEEP-Cases	EUR	Sweden	CC	na	na	Illumina Cardio-metabochip	na	na	PLINK 1.9, GEM v1.4.3
SHEEP-Controls	EUR	Sweden	CC	na	na	Illumina Cardio-metabochip	na	na	PLINK 1.9, GEM v1.4.3
SHIP-START	EUR	Germany	UN	10	na	Affymetrix Genome-Wide Human SNP Array 6.0	Eagle v2.3 and Minimac3 (Michigan Impution Server)	HRC v1.1	LinGxEScanR
SHIP-TREND_B1	EUR	Germany	UN	10	na	Illumina Infinium HumanOmni2.5 BeadChip	Eagle v2.3 and Minimac3 (Michigan Impution Server)	HRC v1.1	LinGxEScanR
SHIP-TREND_B2	EUR	Germany	UN	10	na	Illumina Infinium Global Screening Array	Eagle v2.3 and Minimac3 (Michigan Impution Server)	HRC v1.1	LinGxEScanR
Singapore Chinese Eye Study (SCES-610)	EAS	Singapore	UN	na	na	Illumina610Quad	TOPMed Imputation Server (Minimac 4 - 1.0.2)	TOPMed R2	GEM
Singapore Chinese Eye Study (SCES-omni)	EAS	Singapore	UN	na	na	Illumina OmniExpress	TOPMed Imputation Server (Minimac 4 - 1.0.2)	TOPMed R2	GEM
Singapore Indian Eye Study (SINDI)	SAS	Singapore	UN	3	na	Illumina610Quad	TOPMed Imputation Server (Minimac 4 - 1.0.2)	TOPMed R2	GEM
Singapore Malay Eye Study (SiMES)	EAS	Singapore	UN	2	na	Illumina610Quad	TOPMed Imputation Server (Minimac 4 - 1.0.2)	TOPMed R2	GEM
Singapore Prospective Study Program (SP2-1M)	EAS	Singapore	UN	na	na	Illumina1Mduov3	TOPMed Imputation Server (Minimac 4 - 1.0.2)	TOPMed R2	GEM
Singapore Prospective Study Program (SP2-610)	EAS	Singapore	UN	na	na	Illumina610Quad	TOPMed Imputation Server (Minimac 4 - 1.0.2)	TOPMed R2	GEM
UKB	AFR	UK	UN	1-20	none	UK Biobank Axiom Array	IMPUTE2	HRC, UK10K, and 1000G Phase 3	MMAP
UKB	EAS	UK	UN	1-20	na	UK Biobank Axiom Array	IMPUTE2	HRC, UK10K, and 1000G Phase 3	MMAP
UKB	EUR	UK	UN	1-20	na	UK Biobank Axiom Array	IMPUTE2	HRC, UK10K, and 1000G Phase 3	MMAP
UKB	HIS	UK	UN	1-20	na	UK Biobank Axiom Array	IMPUTE2	HRC, UK10K, and 1000G Phase 3	MMAP
UKB	SAS	UK	UN	1-20	na	UK Biobank Axiom Array	IMPUTE2	HRC, UK10K, and 1000G Phase 3	MMAP
WGHS	EUR	US	UN	3	na	Illumina - HumanHap300 Duo+	TOPMed Imputation server	TOPMed	GEM
WHI-GARNET	EUR	USA	UN	10	age, region	Illumina HumanOmni1-Quad v1-0 B	Minimac4	TOPMed freeze8	LinGxEScanR
WHI-SHARe	AFR	USA	UN	10	region	Affymetrix 6.0	Minimac4	TOPMed Freeze8	LinGxEScanR
WHI-SHARe	HIS	USA	UN	10	age, region	Affymetrix 6.0	Minimac4	TOPMed freeze8	LinGxEScanR
WHI-WHIMS	EUR	USA	CC	10	age, region	HumanOmniExpressExome-8v1_B	Minimac4	TOPMed freeze8	LinGxEScanR
YFS	EUR	Finland	UN	4	field center	Illumina Human670-Quad Custom	Minimac4	TOPMed R2	GEM
* UN: Unrelated; CC: Case-Control; FB: Family-Based
